# Supplementary material for: Comprehensive analysis of scRNA-Seq and bulk RNA-Seq reveals dynamic changes in the tumor immune microenvironment of bladder cancer and establishes a prognostic model
Source: Springer Nature journal article supplement (doi:10.1186/s12967-023-04056-z), 2023-03-27

# ACTG2

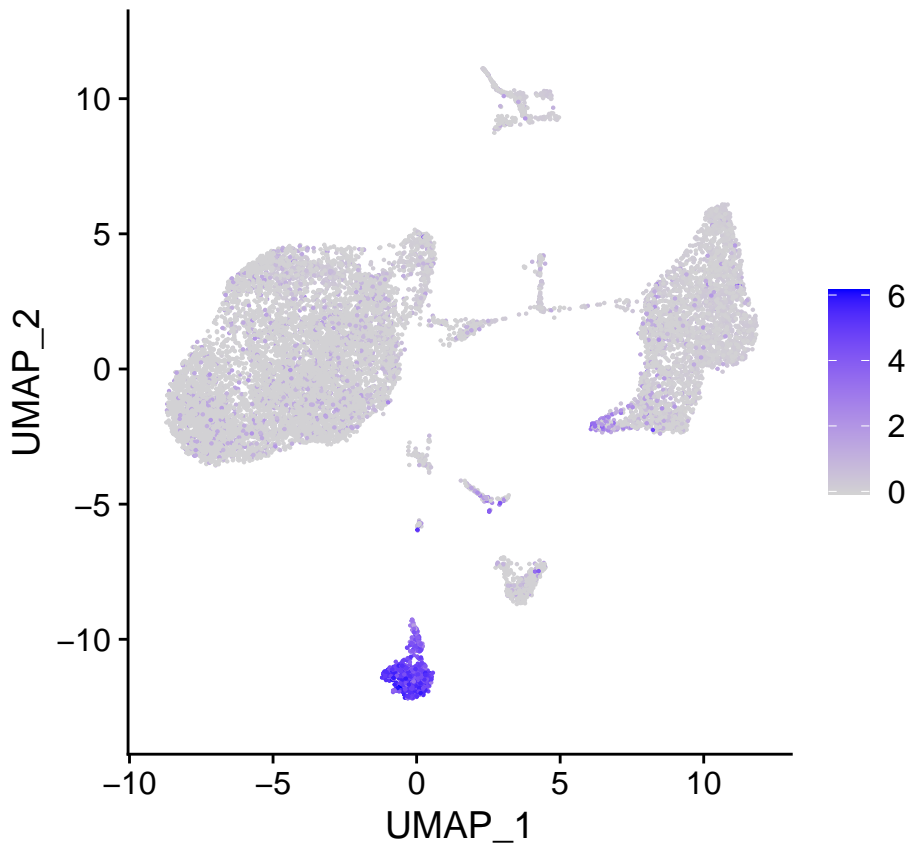

# CD3D

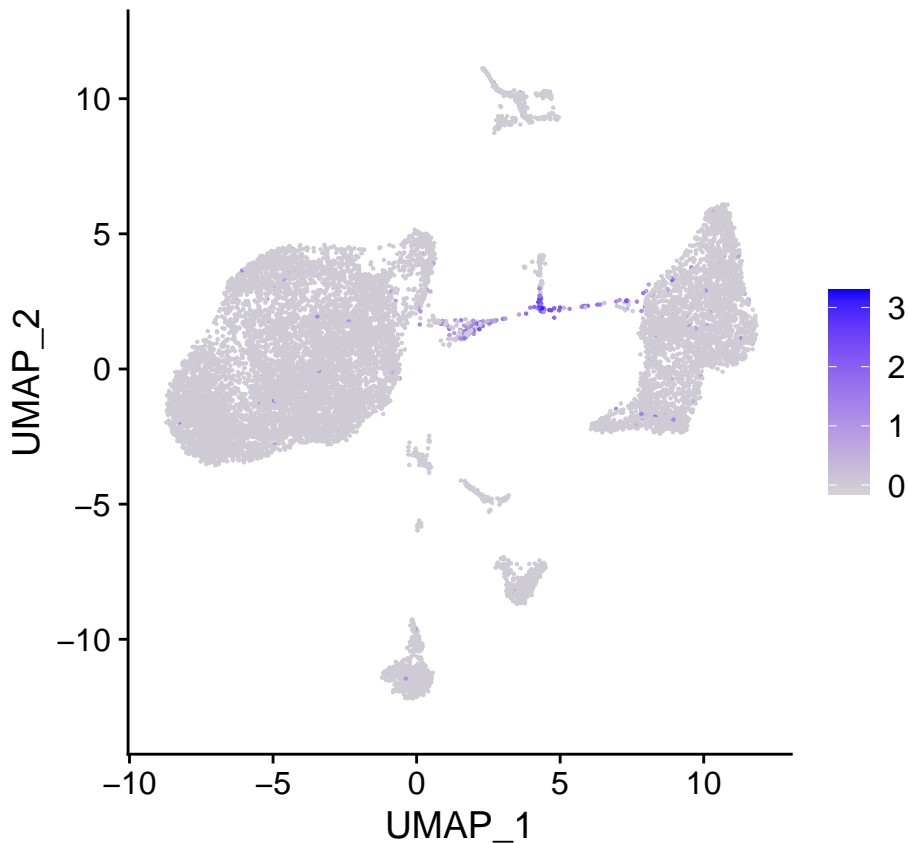

# CD3E

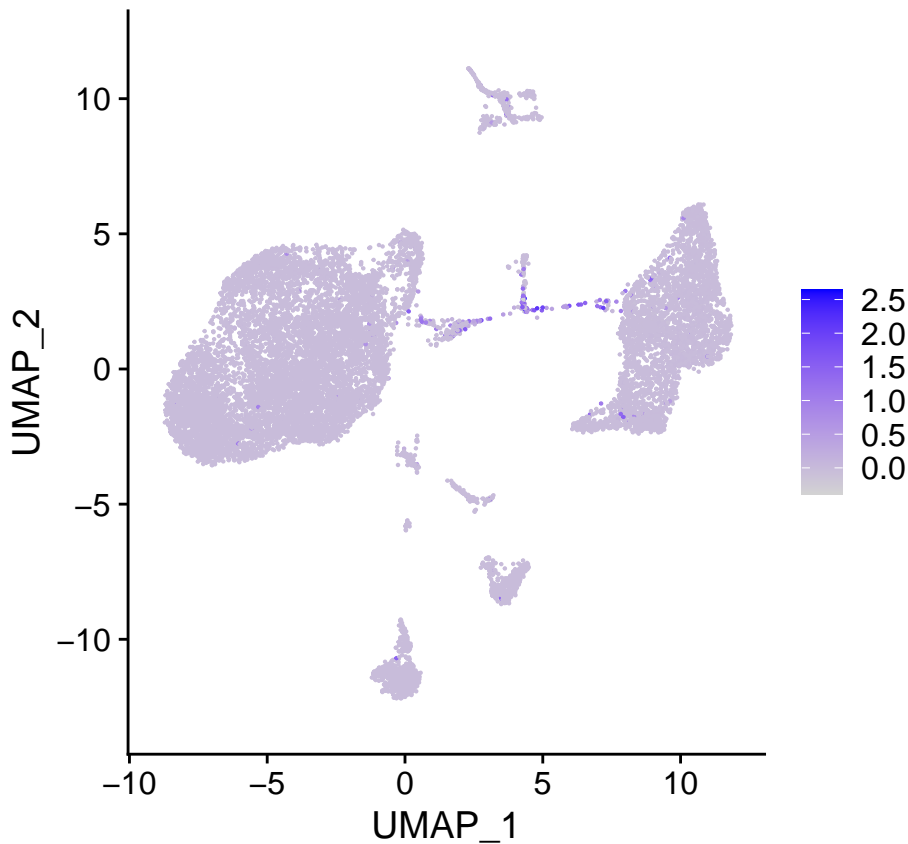

# CD14

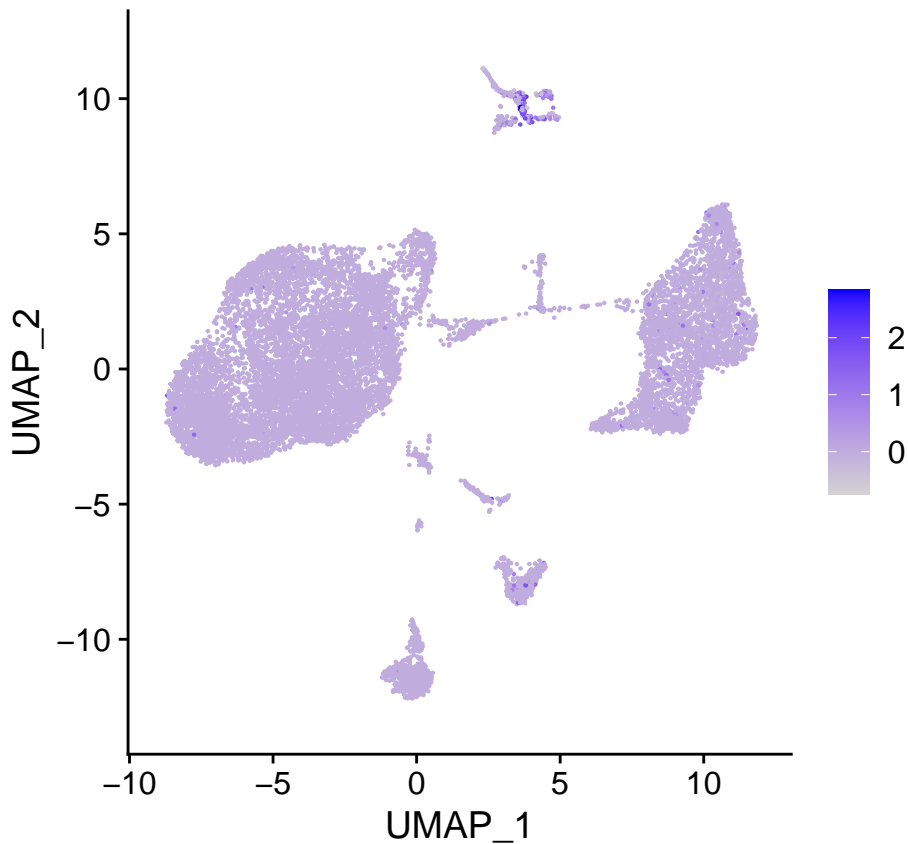

# CD79A

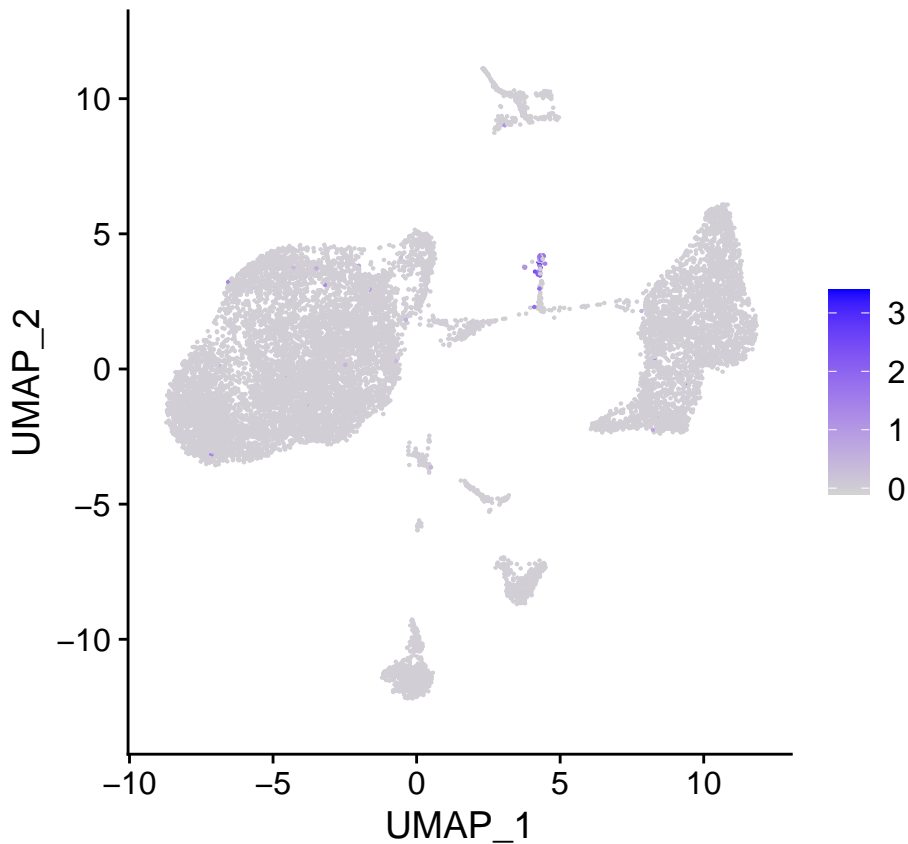

# CDH5

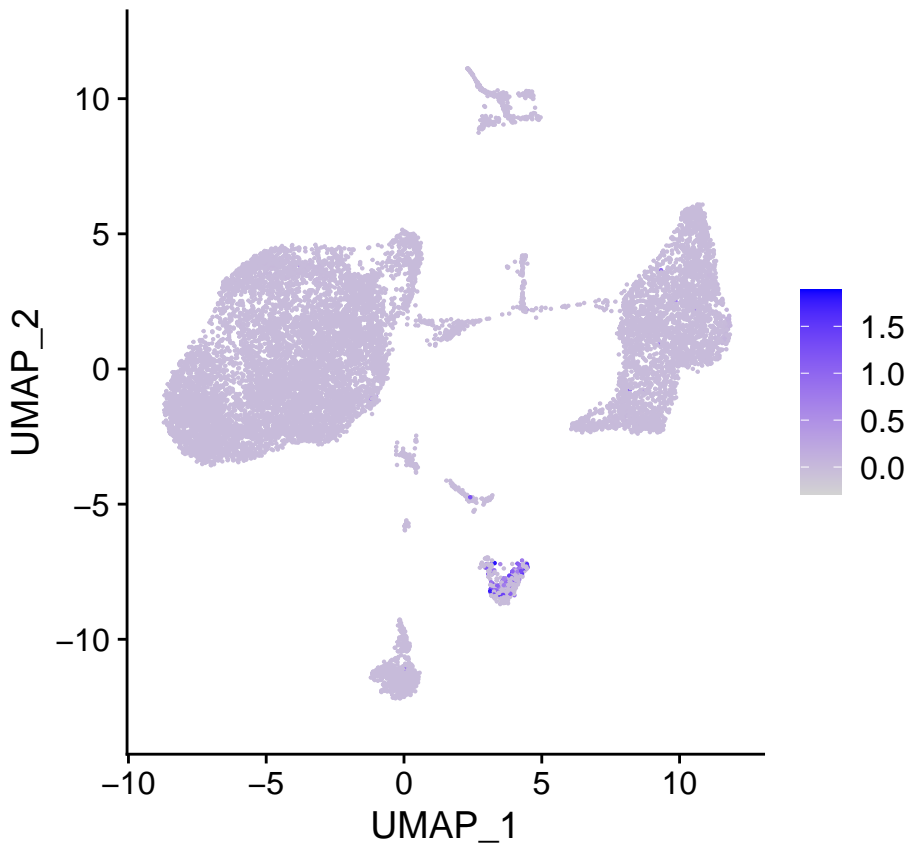

# CNN1

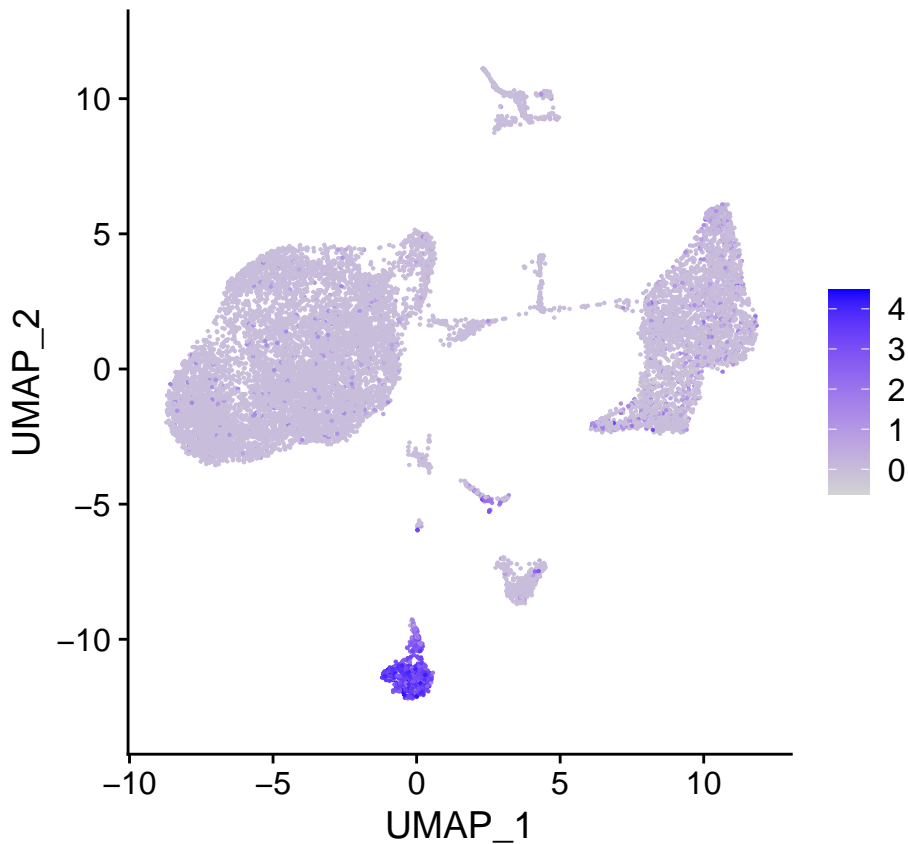

# COL1A1

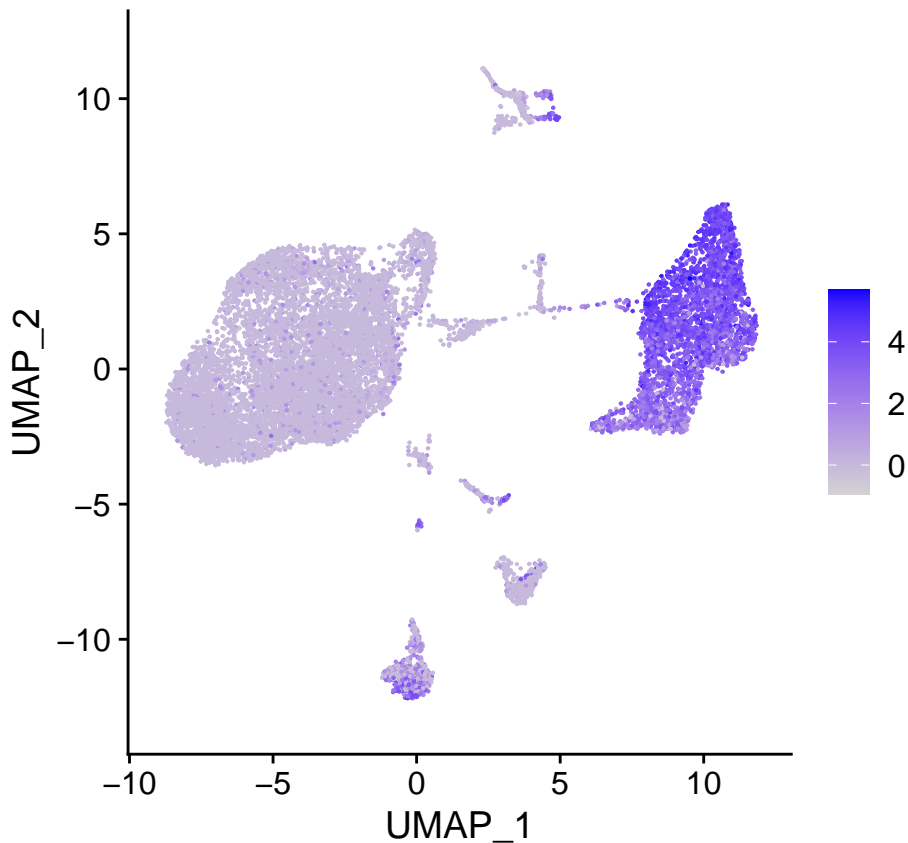



# COL1A2

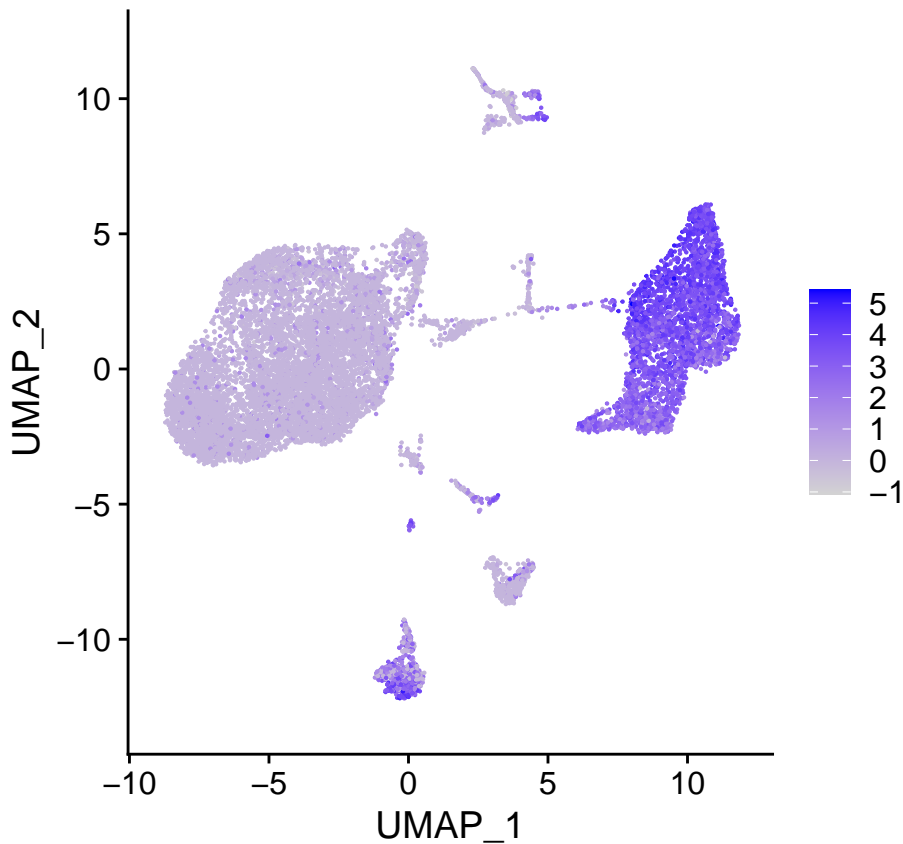

# COL3A1

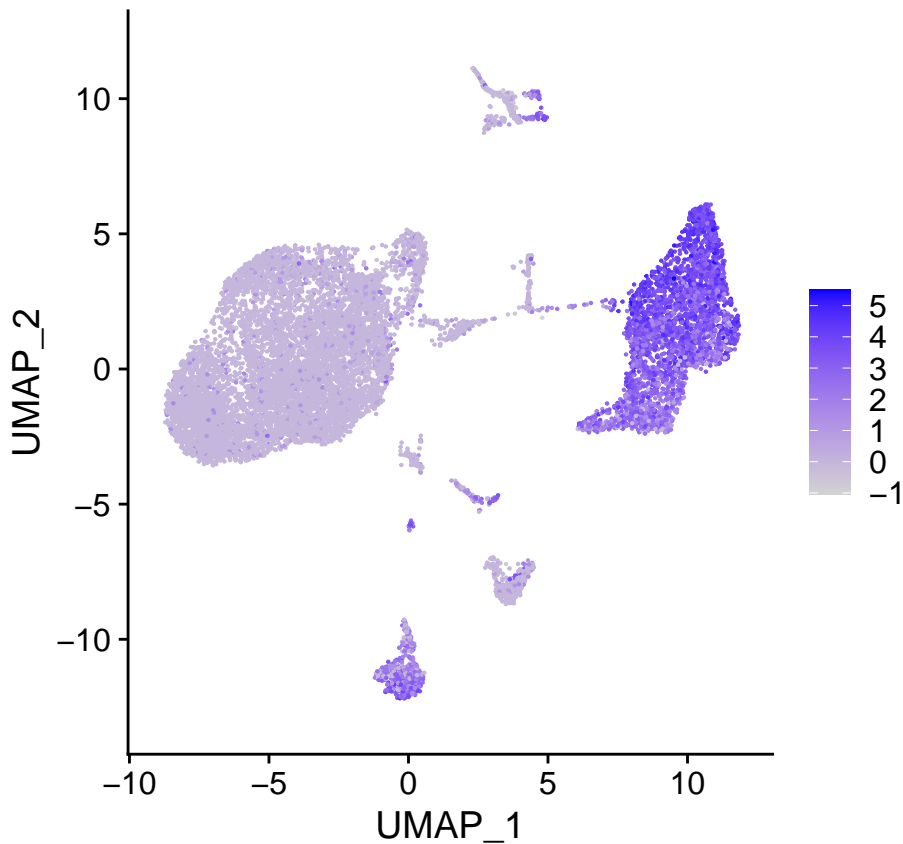

# DES

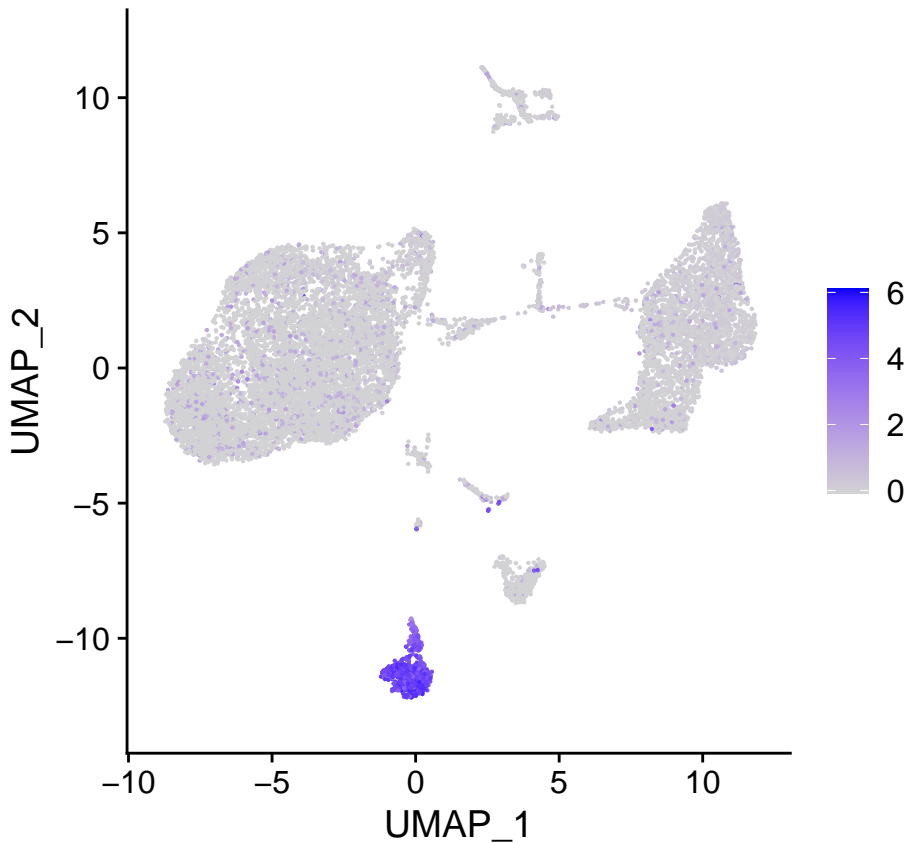

# KRT18

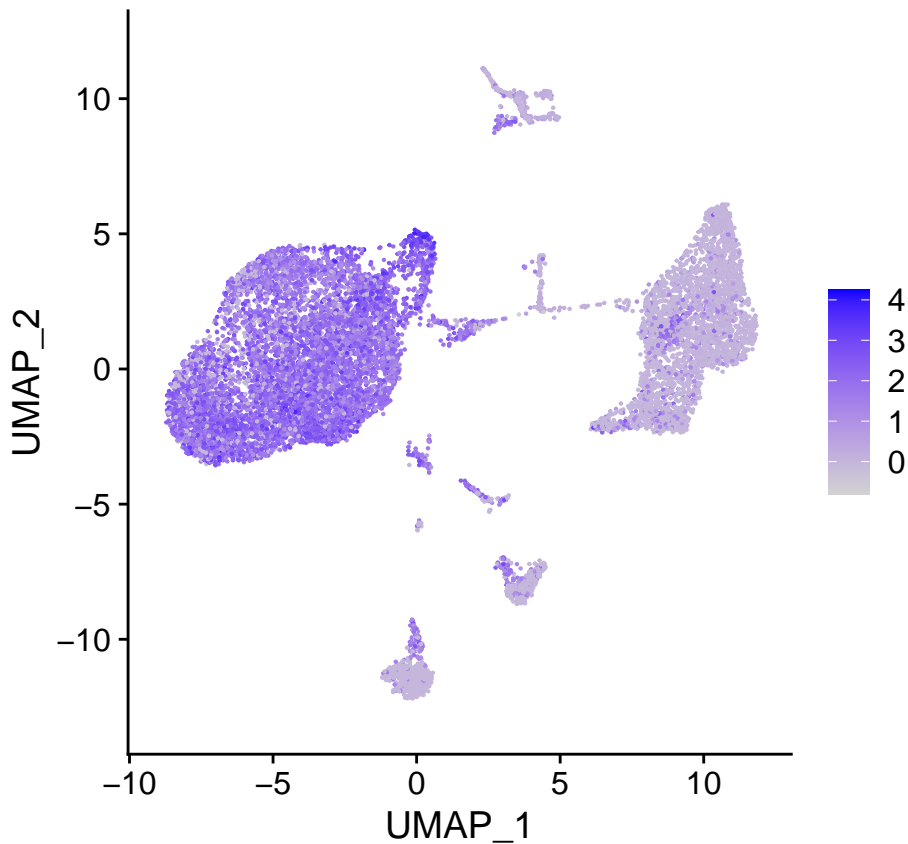

# KRT19

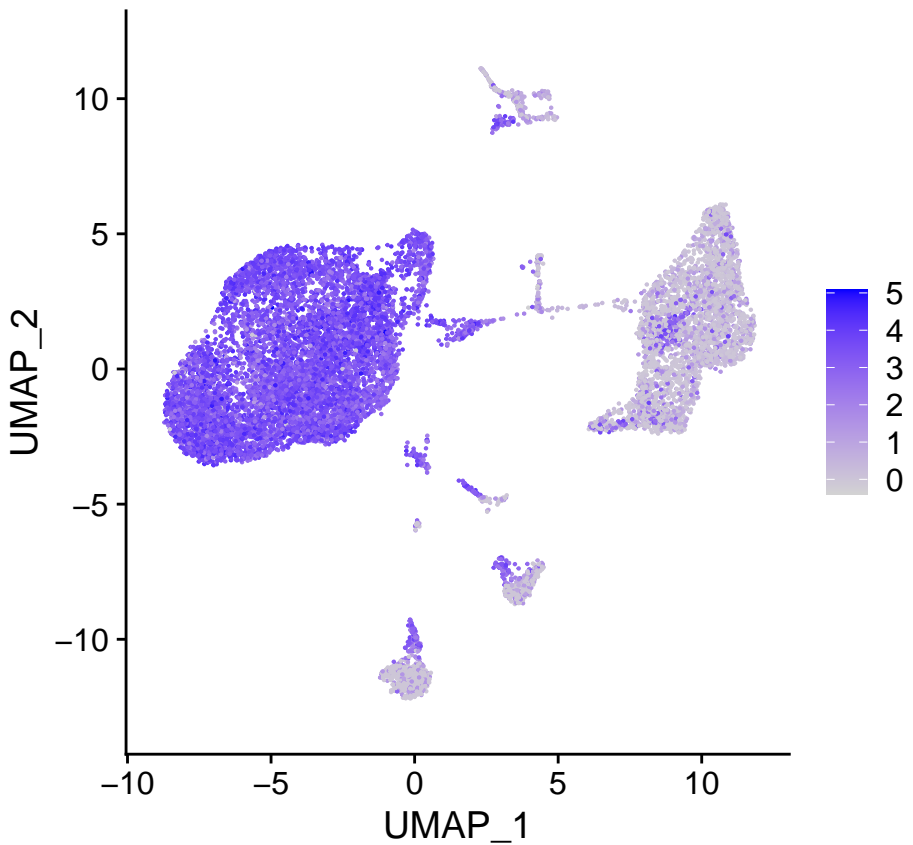

# LYZ

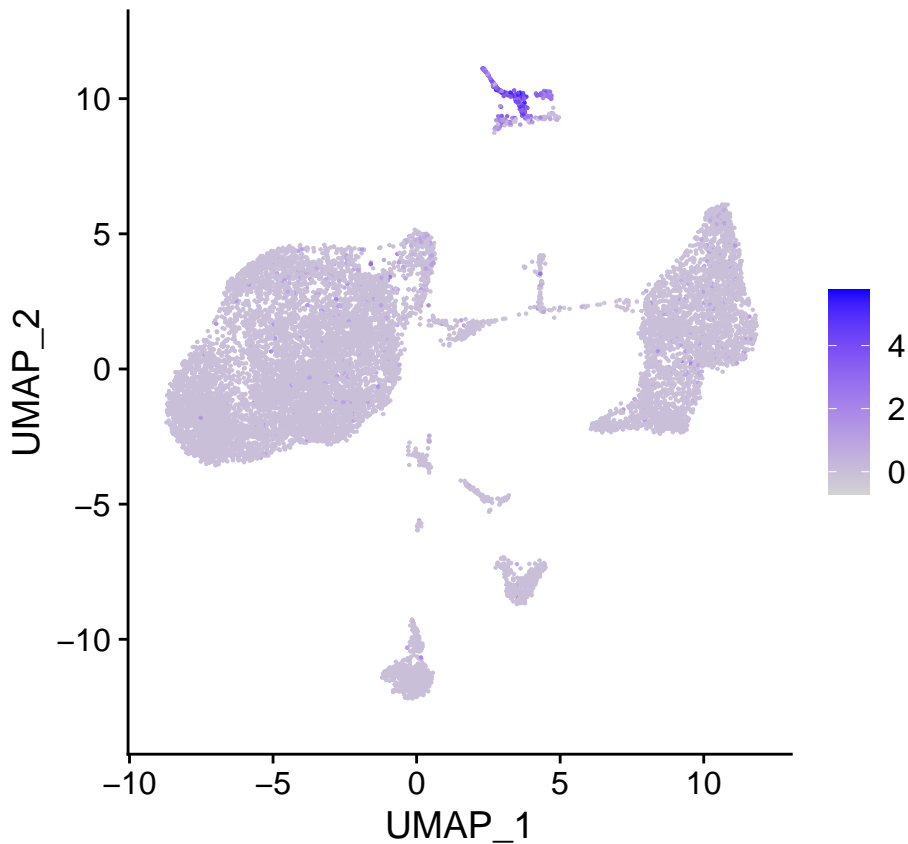

# MS4A7

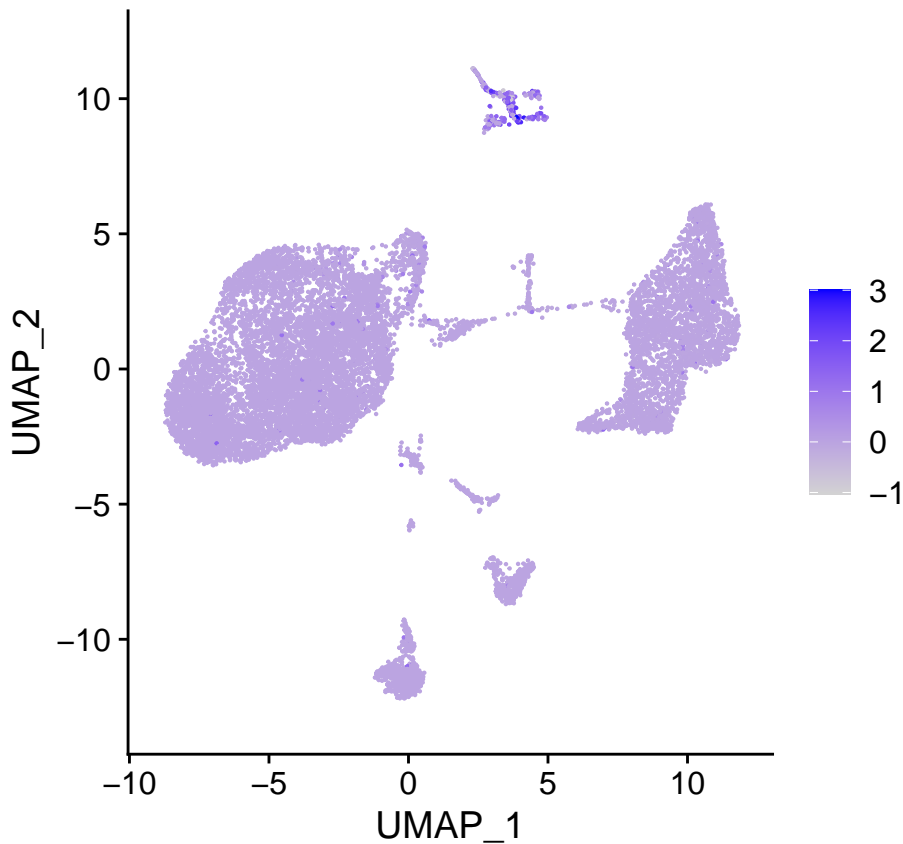

# MZB1

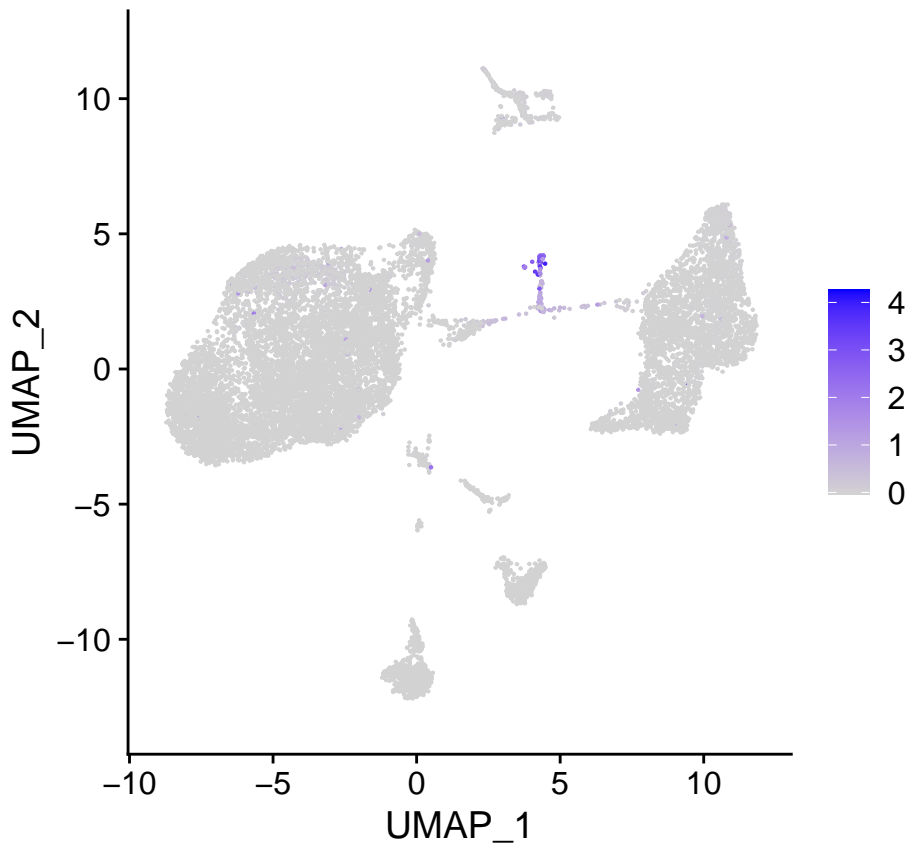



# PECAM1

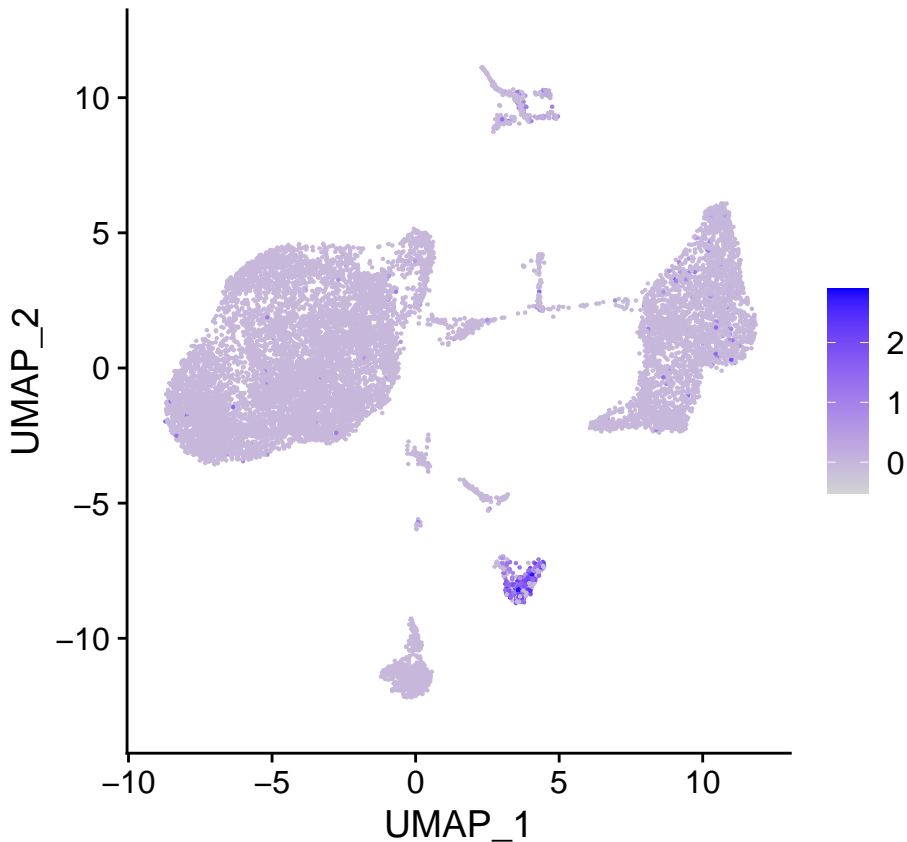

# S100A4

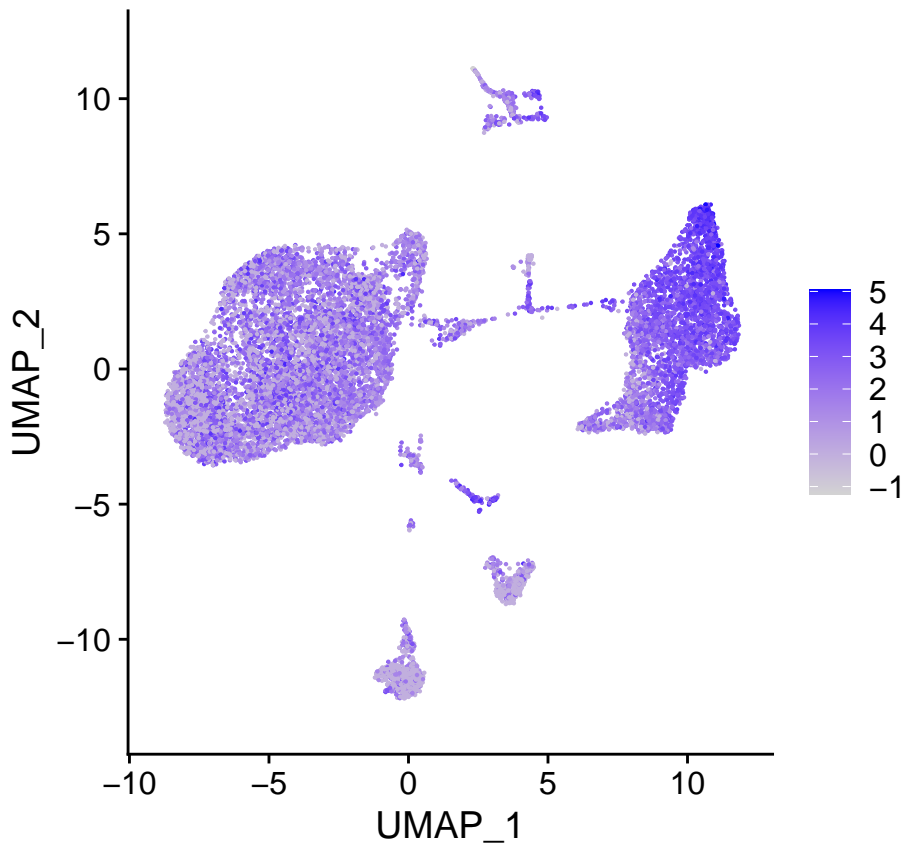

# SELE

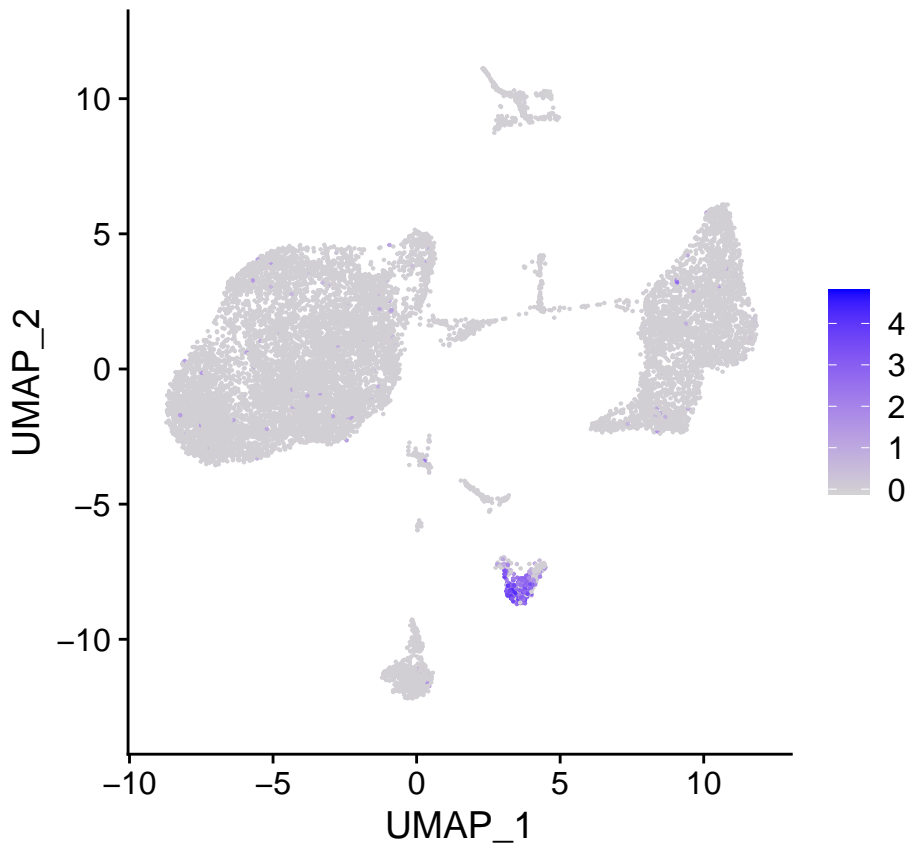

# TAGLN

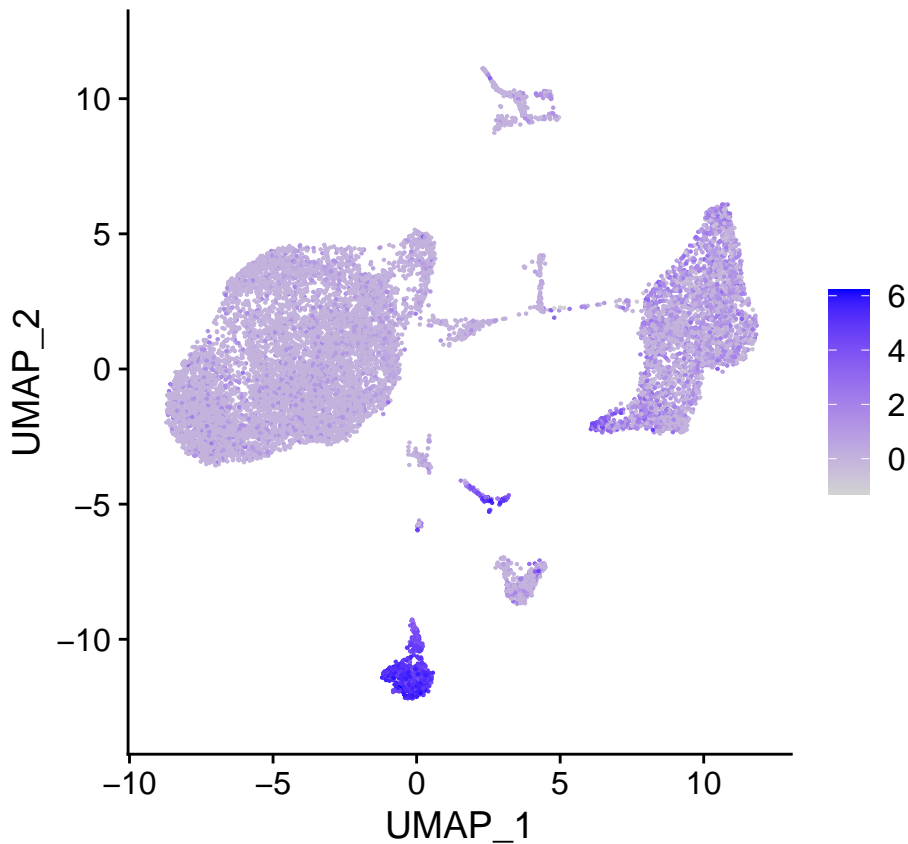

# TPM2

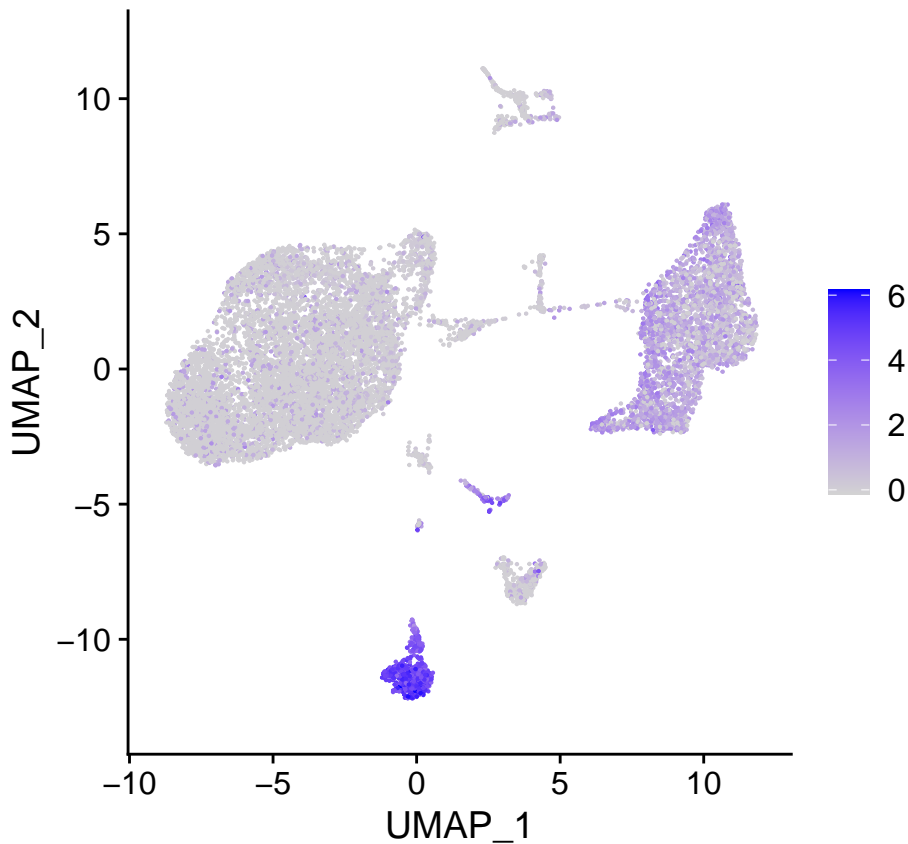

# VCAM1

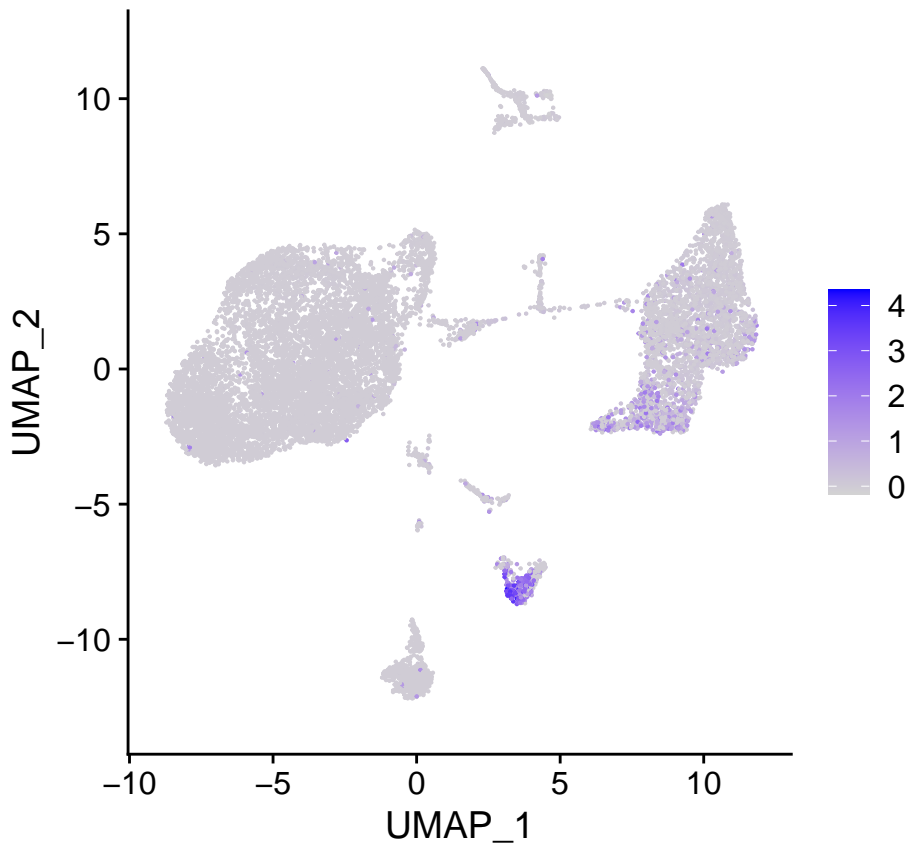

Supplement: MOESM2 [file 24738572]
