# Supplementary material for: Comprehensive analysis of scRNA-Seq and bulk RNA-Seq reveals dynamic changes in the tumor immune microenvironment of bladder cancer and establishes a prognostic model
Source: Springer Nature journal article supplement (doi:10.1186/s12967-023-04056-z), 2023-03-27

# T cell\_inflamed GEP

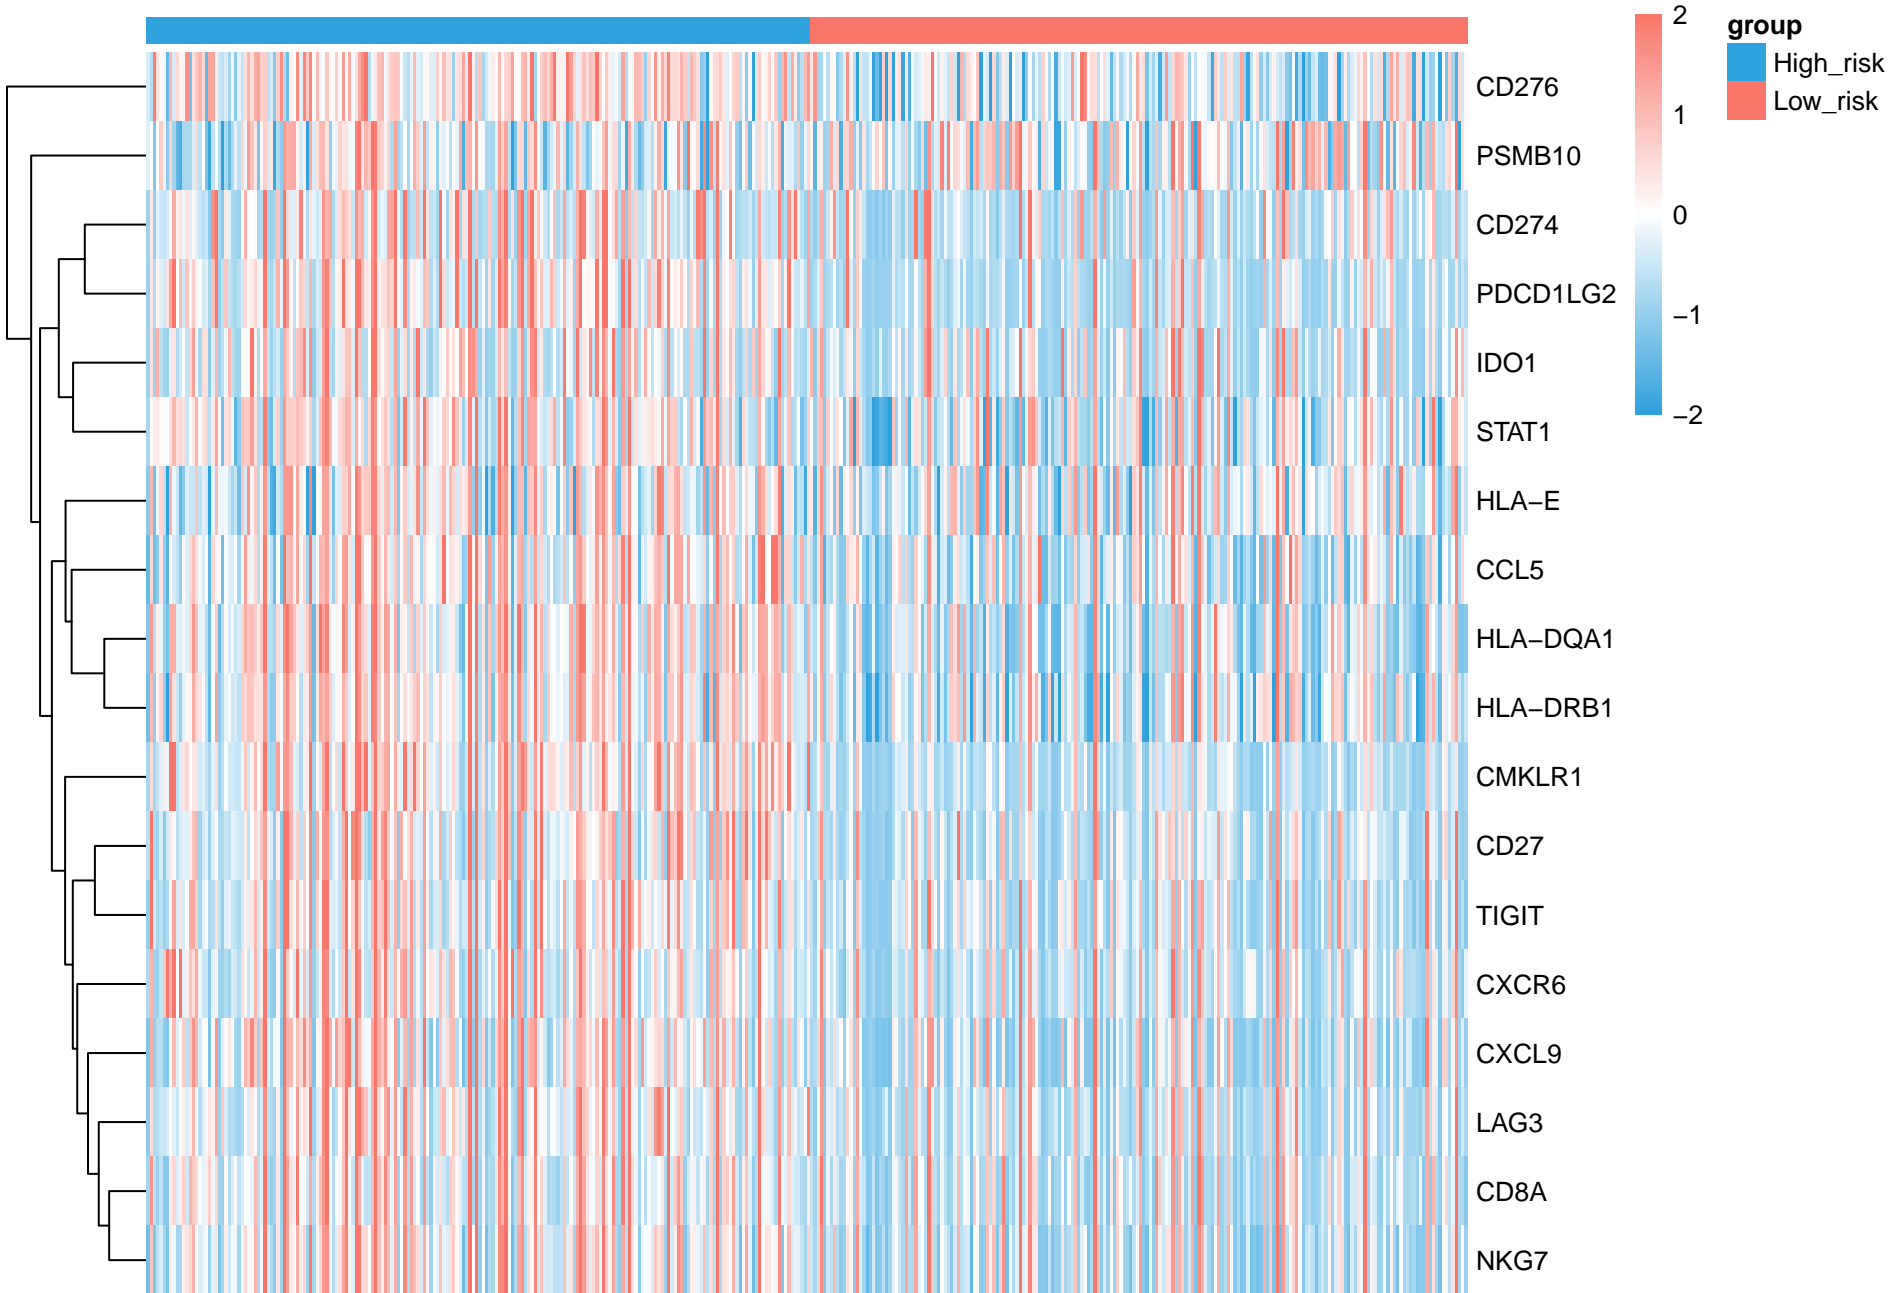

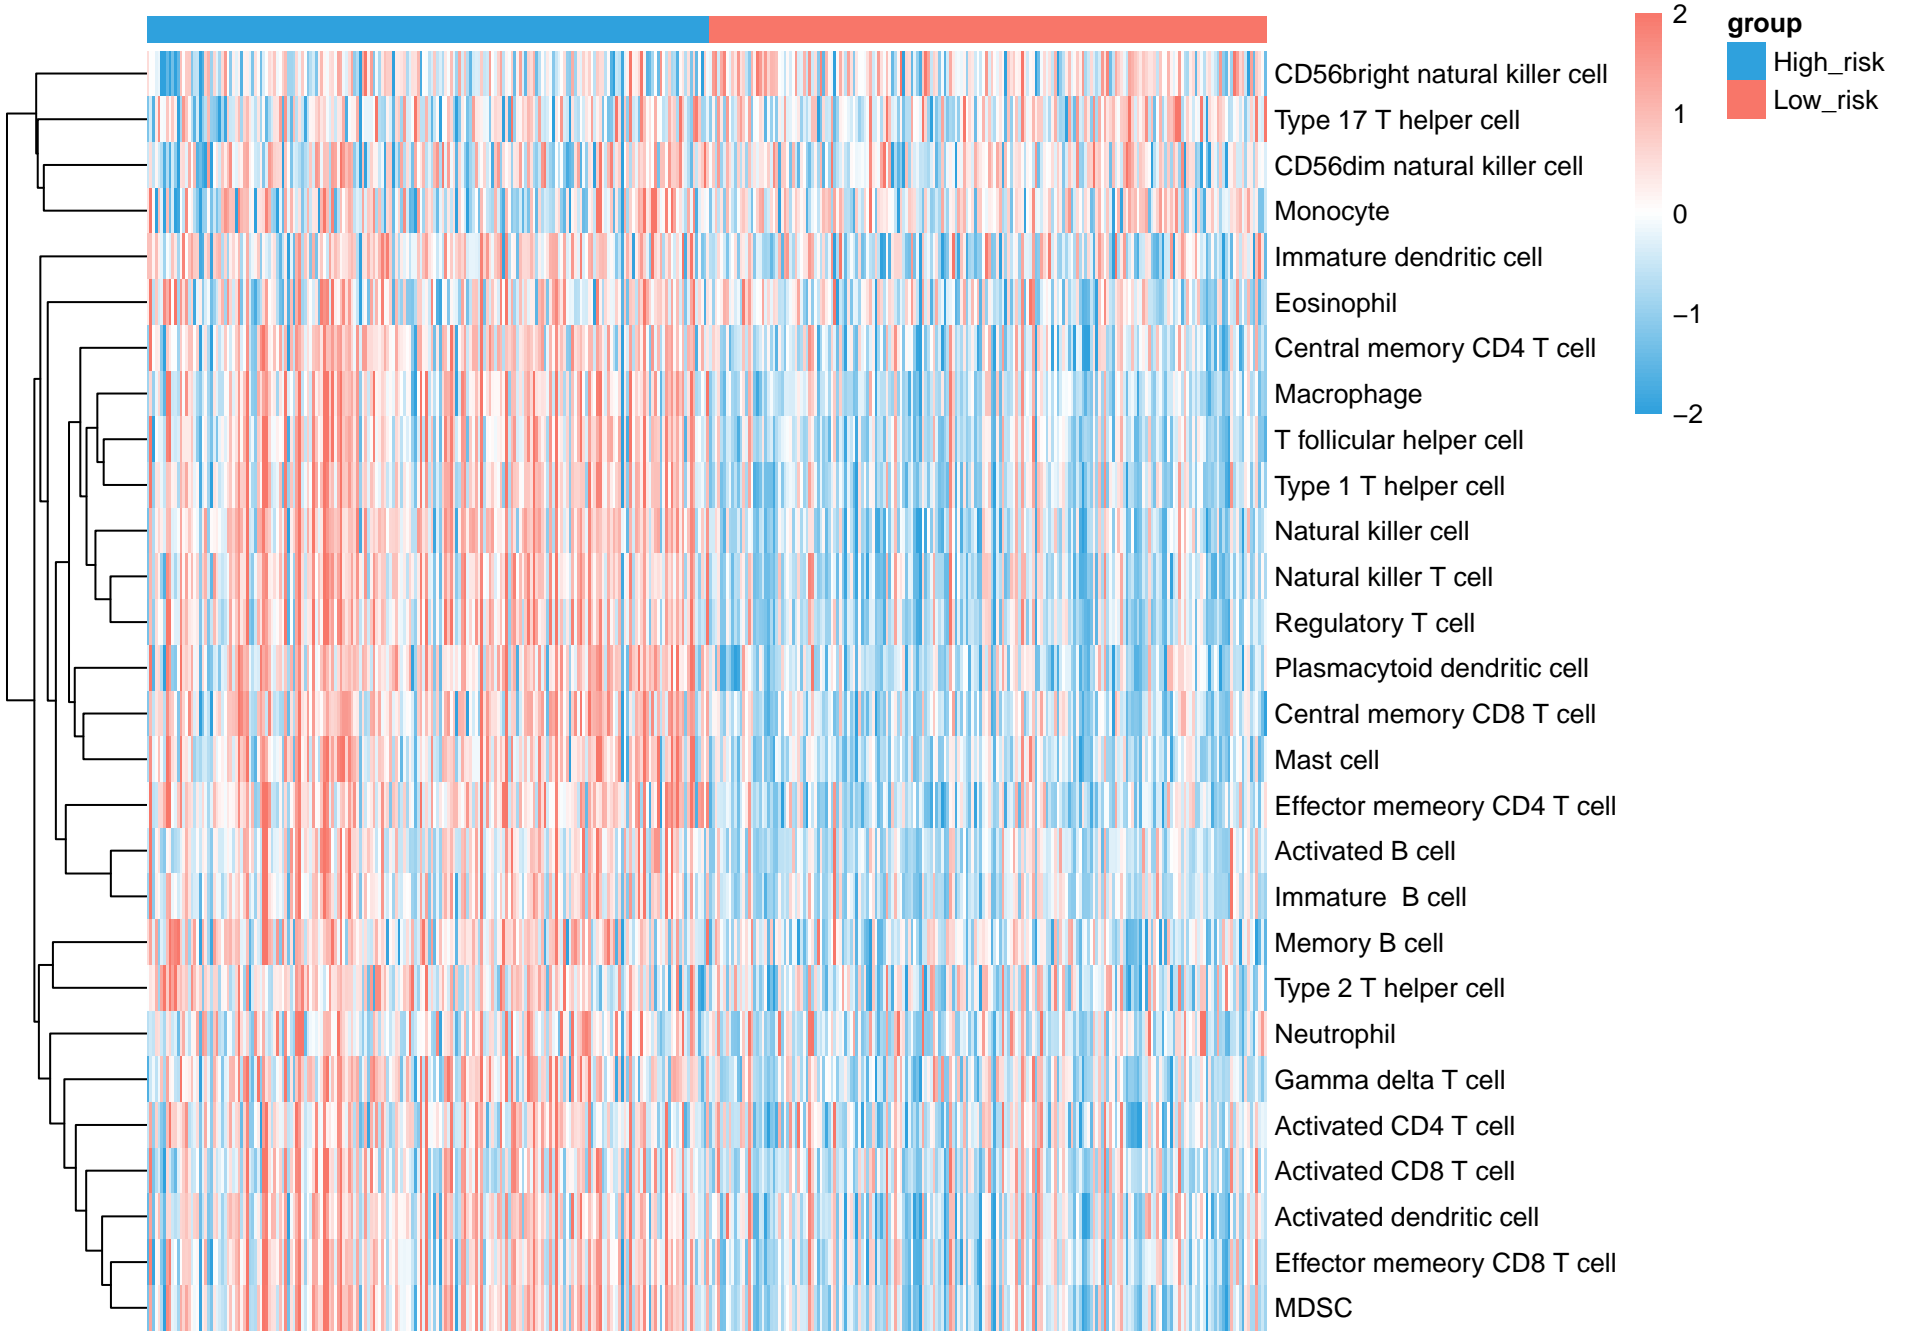

Supplement: MOESM8 [file 24738572]
