# Supplementary material for: Comprehensive analysis of scRNA-Seq and bulk RNA-Seq reveals dynamic changes in the tumor immune microenvironment of bladder cancer and establishes a prognostic model
Source: Springer Nature journal article supplement (doi:10.1186/s12967-023-04056-z), 2023-03-27
Supplement: MOESM10 [file 24738572]

| p_val    | avg_log2F | pct. 1    | pct. 2 | p_val_adj | cluster   | gene               |
|----------|-----------|-----------|--------|-----------|-----------|--------------------|
| CCL23    | 0         | 2.651228  | 0.634  | 0.078     | 0         | Endotheli:CCL23    |
| EMCN     | 0         | 2.2278348 | 0.821  | 0.075     | 0         | Endotheli:EMCN     |
| PCAT19   | 6.29E-267 | 2.2706199 | 0.844  | 0.159     | 1.26E-263 | Endotheli:PCAT19   |
| IFI27    | 3.36E-262 | 3.9424235 | 0.966  | 0.244     | 6.73E-259 | Endotheli:IFI27    |
| AQP1     | 4.88E-251 | 3.0063653 | 0.891  | 0.177     | 9.76E-248 | Endotheli:AQP1     |
| ECSCR.1  | 1.21E-250 | 2.3108478 | 0.838  | 0.093     | 2.41E-247 | Endotheli:ECSCR.1  |
| RNASE1   | 3.44E-243 | 2.6816132 | 0.877  | 0.159     | 6.88E-240 | Endotheli:RNASE1   |
| VWF      | 3.22E-240 | 2.8454161 | 0.844  | 0.146     | 6.44E-237 | Endotheli:VWF      |
| HLA-DRB5 | 1.20E-233 | 2.9518823 | 0.972  | 0.389     | 2.39E-230 | Endotheli:HLA-DRB5 |
| RAMP2    | 3.18E-231 | 2.7690945 | 0.863  | 0.2       | 6.35E-228 | Endotheli:RAMP2    |
| HLA-DRB1 | 2.15E-227 | 3.089671  | 0.978  | 0.323     | 4.29E-224 | Endotheli:HLA-DRB1 |
| GNG11    | 1.48E-219 | 2.5380538 | 0.941  | 0.282     | 2.96E-216 | Endotheli:GNG11    |
| PECAM1   | 5.75E-217 | 2.1870867 | 0.793  | 0.109     | 1.15E-213 | Endotheli:PECAM1   |
| HLA-DRA  | 7.39E-217 | 2.4660482 | 0.969  | 0.281     | 1.48E-213 | Endotheli:HLA-DRA  |
| C2CD4B   | 2.66E-213 | 2.9524438 | 0.799  | 0.246     | 5.32E-210 | Endotheli:C2CD4B   |
| TM4SF1   | 9.95E-212 | 3.5383685 | 0.989  | 0.528     | 1.99E-208 | Endotheli:TM4SF1   |
| ACKR1    | 2.49E-203 | 4.743122  | 0.832  | 0.23      | 4.99E-200 | Endotheli:ACKR1    |
| SELE     | 7.13E-200 | 3.7220063 | 0.782  | 0.239     | 1.43E-196 | Endotheli:SELE     |
| CD74     | 3.54E-196 | 2.9040327 | 0.994  | 0.6       | 7.07E-193 | Endotheli:CD74     |
| CAV1     | 1.42E-193 | 2.5561463 | 0.933  | 0.322     | 2.84E-190 | Endotheli:CAV1     |
| CLDN5    | 7.45E-187 | 2.6902631 | 0.732  | 0.114     | 1.49E-183 | Endotheli:CLDN5    |
| HLA-DQB1 | 2.69E-186 | 1.7972535 | 0.855  | 0.217     | 5.39E-183 | Endotheli:HLA-DQB1 |
| HLA-DPA1 | 4.63E-179 | 1.7838243 | 0.849  | 0.261     | 9.25E-176 | Endotheli:HLA-DPA1 |
| HLA-DPB1 | 6.77E-179 | 1.6985661 | 0.855  | 0.245     | 1.35E-175 | Endotheli:HLA-DPB1 |
| IFITM2   | 2.73E-178 | 1.9580479 | 0.939  | 0.336     | 5.46E-175 | Endotheli:IFITM2   |
| PLVAP    | 4.02E-178 | 2.1259452 | 0.721  | 0.056     | 8.03E-175 | Endotheli:PLVAP    |
| TCF4     | 8.93E-178 | 2.0424056 | 0.83   | 0.209     | 1.79E-174 | Endotheli:TCF4     |
| CXorf36  | 1.07E-177 | 1.411777  | 0.62   | 0.064     | 2.15E-174 | Endotheli:CXorf36  |
| HLA-DQA1 | 8.58E-177 | 1.6131452 | 0.768  | 0.134     | 1.72E-173 | Endotheli:HLA-DQA1 |
| SPARCL1  | 2.24E-175 | 2.3425083 | 0.955  | 0.361     | 4.48E-172 | Endotheli:SPARCL1  |
| ICAM1    | 6.94E-173 | 2.5485211 | 0.866  | 0.329     | 1.39E-169 | Endotheli:ICAM1    |
| IGFBP7   | 4.58E-168 | 2.4038812 | 0.983  | 0.537     | 9.16E-165 | Endotheli:IGFBP7   |
| ADAMTS9  | 5.75E-167 | 2.2962547 | 0.76   | 0.226     | 1.15E-163 | Endotheli:ADAMTS9  |
| ADGRL4   | 3.41E-163 | 1.5624201 | 0.626  | 0.095     | 6.81E-160 | Endotheli:ADGRL4   |
| CD93     | 8.28E-159 | 1.6731642 | 0.656  | 0.082     | 1.66E-155 | Endotheli:CD93     |
| VCAM1    | 1.85E-156 | 3.1750163 | 0.768  | 0.29      | 3.70E-153 | Endotheli:VCAM1    |
| SOX17    | 1.52E-154 | 1.2818282 | 0.536  | 0.1       | 3.04E-151 | Endotheli:SOX17    |
| GIMAP7   | 3.01E-149 | 1.8527124 | 0.642  | 0.098     | 6.02E-146 | Endotheli:GIMAP7   |
| CD200    | 5.92E-142 | 1.4005797 | 0.637  | 0.114     | 1.18E-138 | Endotheli:CD200    |
| TSPAN7   | 5.19E-141 | 1.729538  | 0.707  | 0.218     | 1.04E-137 | Endotheli:TSPAN7   |
| IFITM1   | 1.08E-140 | 1.6848541 | 0.74   | 0.246     | 2.15E-137 | Endotheli:IFITM1   |
| NNMT     | 6.63E-137 | 1.8470259 | 0.835  | 0.297     | 1.33E-133 | Endotheli:NNMT     |
| VIM      | 1.20E-135 | 1.5663884 | 0.994  | 0.403     | 2.41E-132 | Endotheli:VIM      |
| TMEM255B | 1.24E-134 | 1.2406437 | 0.623  | 0.145     | 2.49E-131 | Endotheli:TMEM255B |
| MYCT1    | 9.30E-134 | 1.0017154 | 0.52   | 0.067     | 1.86E-130 | Endotheli:MYCT1    |
| CALCRL   | 1.02E-132 | 1.6163621 | 0.659  | 0.108     | 2.04E-129 | Endotheli:CALCRL   |
| NPDC1    | 4.37E-132 | 1.7590539 | 0.777  | 0.251     | 8.75E-129 | Endotheli:NPDC1    |
| RCAN1    | 9.10E-131 | 1.7296204 | 0.723  | 0.184     | 1.82E-127 | Endotheli:RCAN1    |
| MCTP1    | 2.76E-128 | 1.3053751 | 0.628  | 0.18      | 5.52E-125 | Endotheli:MCTP1    |
| HLA-DMA  | 8.25E-128 | 1.5404673 | 0.743  | 0.227     | 1.65E-124 | Endotheli:HLA-DMA  |

|          |           |           |       |       |           |           |          |
|----------|-----------|-----------|-------|-------|-----------|-----------|----------|
| RND1     | 8.53E-126 | 1.738191  | 0.642 | 0.165 | 1.71E-122 | Endotheli | RND1     |
| IFITM3   | 2.78E-123 | 1.5846337 | 0.992 | 0.67  | 5.56E-120 | Endotheli | IFITM3   |
| ARHGAP29 | 2.81E-123 | 1.5390612 | 0.684 | 0.204 | 5.61E-120 | Endotheli | ARHGAP29 |
| SOX7     | 5.56E-123 | 1.3283656 | 0.603 | 0.143 | 1.11E-119 | Endotheli | SOX7     |
| RAMP3    | 3.56E-121 | 1.9011376 | 0.659 | 0.176 | 7.11E-118 | Endotheli | RAMP3    |
| STC1     | 7.37E-121 | 2.8565775 | 0.687 | 0.249 | 1.47E-117 | Endotheli | STC1     |
| ENG      | 5.31E-113 | 1.3097992 | 0.654 | 0.158 | 1.06E-109 | Endotheli | ENG      |
| NRN1     | 4.48E-112 | 1.1631582 | 0.511 | 0.08  | 8.97E-109 | Endotheli | NRN1     |
| ANGPT2   | 1.11E-111 | 1.4788921 | 0.55  | 0.121 | 2.22E-108 | Endotheli | ANGPT2   |
| ZNF385D  | 2.50E-111 | 1.6980139 | 0.634 | 0.179 | 5.01E-108 | Endotheli | ZNF385D  |
| IL6      | 4.10E-111 | 2.7918448 | 0.651 | 0.174 | 8.20E-108 | Endotheli | IL6      |
| SLC2A3   | 2.49E-110 | 1.6284175 | 0.696 | 0.196 | 4.98E-107 | Endotheli | SLC2A3   |
| MGST1    | 4.98E-109 | -1.877363 | 0.397 | 0.853 | 9.96E-106 | Endotheli | MGST1    |
| CSF3     | 1.05E-106 | 2.4650963 | 0.67  | 0.293 | 2.10E-103 | Endotheli | CSF3     |
| FLT1     | 3.29E-106 | 1.1555852 | 0.531 | 0.095 | 6.58E-103 | Endotheli | FLT1     |
| FAM167B  | 1.09E-105 | 1.357732  | 0.561 | 0.167 | 2.19E-102 | Endotheli | FAM167B  |
| ADAMTS4  | 2.64E-99  | 1.3573787 | 0.626 | 0.209 | 5.28E-96  | Endotheli | ADAMTS4  |
| UPP1     | 6.99E-99  | 1.3948682 | 0.715 | 0.292 | 1.40E-95  | Endotheli | UPP1     |
| JAM2     | 4.74E-97  | 1.3817215 | 0.668 | 0.279 | 9.49E-94  | Endotheli | JAM2     |
| BCAM     | 2.65E-96  | 1.3930345 | 0.751 | 0.343 | 5.31E-93  | Endotheli | BCAM     |
| TNFSF10  | 1.27E-95  | 1.6352071 | 0.668 | 0.246 | 2.54E-92  | Endotheli | TNFSF10  |
| LY96     | 7.65E-95  | 1.2364722 | 0.626 | 0.201 | 1.53E-91  | Endotheli | LY96     |
| CNKS3    | 5.14E-93  | 1.2997656 | 0.609 | 0.241 | 1.03E-89  | Endotheli | CNKS3    |
| RHOJ     | 7.33E-89  | 1.1750116 | 0.57  | 0.2   | 1.47E-85  | Endotheli | RHOJ     |
| MT2A     | 6.56E-88  | 1.7536108 | 0.832 | 0.441 | 1.31E-84  | Endotheli | MT2A     |
| CCL2     | 9.14E-88  | 2.1304787 | 0.743 | 0.303 | 1.83E-84  | Endotheli | CCL2     |
| MEF2C    | 3.04E-86  | 1.2388495 | 0.659 | 0.257 | 6.08E-83  | Endotheli | MEF2C    |
| A2M      | 4.37E-85  | 1.2395102 | 0.804 | 0.41  | 8.74E-82  | Endotheli | A2M      |
| S1PR1    | 7.72E-85  | 1.1238405 | 0.545 | 0.196 | 1.54E-81  | Endotheli | S1PR1    |
| CXCL2    | 6.04E-84  | 2.2345501 | 0.807 | 0.453 | 1.21E-80  | Endotheli | CXCL2    |
| IL3RA    | 2.80E-81  | 1.107187  | 0.567 | 0.247 | 5.61E-78  | Endotheli | IL3RA    |
| FX3D3    | 1.89E-80  | -1.941941 | 0.425 | 0.85  | 3.77E-77  | Endotheli | FX3D3    |
| FNIP2    | 1.31E-79  | 1.26549   | 0.69  | 0.302 | 2.61E-76  | Endotheli | FNIP2    |
| C1orf54  | 1.42E-78  | 1.0129749 | 0.595 | 0.207 | 2.84E-75  | Endotheli | C1orf54  |
| YPEL2    | 1.53E-78  | 1.1692188 | 0.603 | 0.254 | 3.05E-75  | Endotheli | YPEL2    |
| INSIG1   | 2.32E-77  | 1.2759292 | 0.735 | 0.378 | 4.64E-74  | Endotheli | INSIG1   |
| ESAM     | 1.57E-75  | 1.3230904 | 0.564 | 0.218 | 3.14E-72  | Endotheli | ESAM     |
| AQP3     | 8.39E-75  | -1.924972 | 0.553 | 0.906 | 1.68E-71  | Endotheli | AQP3     |
| SELP     | 2.34E-74  | 1.2393511 | 0.503 | 0.117 | 4.69E-71  | Endotheli | SELP     |
| CSRP2    | 2.21E-73  | 1.3000715 | 0.651 | 0.305 | 4.41E-70  | Endotheli | CSRP2    |
| PTRF     | 2.54E-72  | 1.0019288 | 0.757 | 0.326 | 5.07E-69  | Endotheli | PTRF     |
| SOCS3    | 1.24E-71  | 1.6238831 | 0.765 | 0.422 | 2.48E-68  | Endotheli | SOCS3    |
| SPRY1    | 1.64E-71  | 1.8858208 | 0.642 | 0.259 | 3.28E-68  | Endotheli | SPRY1    |
| KRT19    | 2.02E-71  | -2.142143 | 0.592 | 0.898 | 4.04E-68  | Endotheli | KRT19    |
| PALMD    | 3.82E-71  | 1.1998018 | 0.528 | 0.162 | 7.63E-68  | Endotheli | PALMD    |
| THBD     | 1.78E-70  | 1.2790803 | 0.645 | 0.276 | 3.55E-67  | Endotheli | THBD     |
| CD34     | 9.81E-70  | 1.0601834 | 0.556 | 0.162 | 1.96E-66  | Endotheli | CD34     |
| LY6D     | 1.69E-69  | -2.097141 | 0.461 | 0.842 | 3.39E-66  | Endotheli | LY6D     |
| COL15A1  | 4.58E-69  | 1.1159484 | 0.615 | 0.27  | 9.15E-66  | Endotheli | COL15A1  |
| DUSP6    | 6.65E-69  | 1.0864983 | 0.615 | 0.24  | 1.33E-65  | Endotheli | DUSP6    |
| AGR2     | 1.88E-67  | -1.81423  | 0.433 | 0.823 | 3.76E-64  | Endotheli | AGR2     |

|          |          |             |       |       |          |           |          |
|----------|----------|-------------|-------|-------|----------|-----------|----------|
| KLF2     | 7.37E-66 | 1.3050493   | 0.648 | 0.281 | 1.47E-62 | Endotheli | KLF2     |
| HPGD     | 8.06E-64 | -1.59321    | 0.369 | 0.743 | 1.61E-60 | Endotheli | HPGD     |
| ARL4A    | 7.10E-63 | 1.366894    | 0.628 | 0.297 | 1.42E-59 | Endotheli | ARL4A    |
| CYP1B1   | 1.99E-62 | 1.4037417   | 0.511 | 0.175 | 3.98E-59 | Endotheli | CYP1B1   |
| HSPG2    | 4.62E-62 | 1.002473    | 0.598 | 0.22  | 9.24E-59 | Endotheli | HSPG2    |
| SFN      | 2.50E-61 | -1.761701   | 0.466 | 0.827 | 5.00E-58 | Endotheli | SFN      |
| EZR      | 1.69E-60 | -1.277491   | 0.492 | 0.832 | 3.38E-57 | Endotheli | EZR      |
| KRT8     | 1.04E-58 | -1.510696   | 0.494 | 0.83  | 2.09E-55 | Endotheli | KRT8     |
| S100A4   | 1.27E-58 | -1.877165   | 0.447 | 0.751 | 2.54E-55 | Endotheli | S100A4   |
| ADAMTS1  | 4.49E-58 | 1.2099241   | 0.564 | 0.198 | 8.98E-55 | Endotheli | ADAMTS1  |
| GPX2     | 4.99E-58 | -1.427448   | 0.436 | 0.816 | 9.97E-55 | Endotheli | GPX2     |
| KRT18    | 1.24E-57 | -1.441861   | 0.444 | 0.816 | 2.47E-54 | Endotheli | KRT18    |
| C19orf33 | 1.32E-57 | -1.401047   | 0.411 | 0.79  | 2.63E-54 | Endotheli | C19orf33 |
| CFD      | 3.08E-57 | -3.082278   | 0.332 | 0.686 | 6.16E-54 | Endotheli | CFD      |
| KRT13    | 6.19E-56 | -1.882546   | 0.553 | 0.868 | 1.24E-52 | Endotheli | KRT13    |
| AKR1C2   | 1.87E-54 | -1.400234   | 0.472 | 0.806 | 3.75E-51 | Endotheli | AKR1C2   |
| CLDN4    | 5.26E-50 | -2.017136   | 0.433 | 0.764 | 1.05E-46 | Endotheli | CLDN4    |
| GPRC5A   | 9.95E-50 | -1.138158   | 0.455 | 0.769 | 1.99E-46 | Endotheli | GPRC5A   |
| KLF5     | 1.55E-49 | -1.284968   | 0.422 | 0.768 | 3.11E-46 | Endotheli | KLF5     |
| SMIM22   | 1.62E-49 | -1.347696   | 0.38  | 0.738 | 3.25E-46 | Endotheli | SMIM22   |
| KRT7     | 4.07E-49 | -1.564295   | 0.355 | 0.723 | 8.15E-46 | Endotheli | KRT7     |
| SPINT2   | 4.02E-47 | -1.297382   | 0.422 | 0.757 | 8.04E-44 | Endotheli | SPINT2   |
| DHRS2    | 2.47E-43 | -1.659521   | 0.453 | 0.76  | 4.95E-40 | Endotheli | DHRS2    |
| SERPINB5 | 8.18E-42 | -1.054485   | 0.399 | 0.731 | 1.64E-38 | Endotheli | SERPINB5 |
| HN1      | 1.06E-41 | -1.010216   | 0.321 | 0.69  | 2.12E-38 | Endotheli | HN1      |
| LYPD3    | 4.95E-39 | -1.075226   | 0.254 | 0.57  | 9.89E-36 | Endotheli | LYPD3    |
| ANXA10   | 5.58E-39 | -1.078144   | 0.355 | 0.659 | 1.12E-35 | Endotheli | ANXA10   |
| FAM3B    | 3.39E-38 | -1.046532   | 0.363 | 0.671 | 6.77E-35 | Endotheli | FAM3B    |
| LAMB3    | 4.60E-36 | -1.023802   | 0.391 | 0.701 | 9.20E-33 | Endotheli | LAMB3    |
| PTGDS    |          | 0 3.7084805 | 0.847 | 0.125 |          | Fibroblas | PTGDS    |
| PLA2G2A  |          | 0 3.3046148 | 0.685 | 0.155 |          | Fibroblas | PLA2G2A  |
| APOE     |          | 0 3.5003441 | 0.825 | 0.162 |          | Fibroblas | APOE     |
| CCL11    |          | 0 1.3848068 | 0.77  | 0.123 |          | Fibroblas | CCL11    |
| SFRP4    |          | 0 2.5848317 | 0.605 | 0.052 |          | Fibroblas | SFRP4    |
| PCP4     |          | 0 -1.658295 | 0.686 | 0.223 |          | Fibroblas | PCP4     |
| IGHG1    |          | 0 -2.160151 | 0.655 | 0.177 |          | Fibroblas | IGHG1    |
| APOD     |          | 0 2.0857326 | 0.843 | 0.174 |          | Fibroblas | APOD     |
| MYLK     |          | 0 -1.190416 | 0.701 | 0.232 |          | Fibroblas | MYLK     |
| MYH11    |          | 0 -1.216996 | 0.725 | 0.259 |          | Fibroblas | MYH11    |
| MT2A1    |          | 0 2.0212149 | 0.806 | 0.328 |          | Fibroblas | MT2A     |
| SFRP1    |          | 0 2.9111197 | 0.889 | 0.05  |          | Fibroblas | SFRP1    |
| CHRD12   |          | 0 1.2314591 | 0.791 | 0.146 |          | Fibroblas | CHRD12   |
| IGHA1    |          | 0 -1.506902 | 0.598 | 0.138 |          | Fibroblas | IGHA1    |
| MFAP5    |          | 0 3.312343  | 0.75  | 0.077 |          | Fibroblas | MFAP5    |
| TNFAIP6  |          | 0 3.1141523 | 0.802 | 0.109 |          | Fibroblas | TNFAIP6  |
| PCOLCE2  |          | 0 2.195435  | 0.735 | 0.081 |          | Fibroblas | PCOLCE2  |
| AGR21    |          | 0 -2.63162  | 0.582 | 0.893 |          | Fibroblas | AGR2     |
| PI16     |          | 0 2.5511948 | 0.723 | 0.092 |          | Fibroblas | PI16     |
| CTGF     |          | 0 1.6021967 | 0.668 | 0.085 |          | Fibroblas | CTGF     |
| POSTN    |          | 0 1.2101334 | 0.64  | 0.093 |          | Fibroblas | POSTN    |
| SERPINE2 |          | 0 2.9724156 | 0.855 | 0.136 |          | Fibroblas | SERPINE2 |

|           |              |        |        |                       |
|-----------|--------------|--------|--------|-----------------------|
| KRT71     | 0 -2. 228122 | 0. 459 | 0. 803 | 0 Fibroblas·KRT7      |
| A2M1      | 0 1. 6630751 | 0. 9   | 0. 253 | 0 Fibroblas·A2M       |
| IGLC2     | 0 -2. 053412 | 0. 516 | 0. 052 | 0 Fibroblas·IGLC2     |
| CTHRC1    | 0 1. 5168443 | 0. 652 | 0. 076 | 0 Fibroblas·CTHRC1    |
| MEG3      | 0 2. 248989  | 0. 846 | 0. 063 | 0 Fibroblas·MEG3      |
| IGFBP5    | 0 3. 1189015 | 0. 933 | 0. 42  | 0 Fibroblas·IGFBP5    |
| IGFBP6    | 0 3. 5028309 | 0. 869 | 0. 147 | 0 Fibroblas·IGFBP6    |
| IGHM      | 0 -1. 093852 | 0. 652 | 0. 15  | 0 Fibroblas·IGHM      |
| SFRP2     | 0 4. 4164523 | 0. 936 | 0. 112 | 0 Fibroblas·SFRP2     |
| SRPX      | 0 1. 4606192 | 0. 831 | 0. 058 | 0 Fibroblas·SRPX      |
| TSTD1     | 0 -1. 371031 | 0. 265 | 0. 647 | 0 Fibroblas·TSTD1     |
| ATP1B1    | 0 -1. 275924 | 0. 287 | 0. 591 | 0 Fibroblas·ATP1B1    |
| BDKRB1    | 0 1. 4675594 | 0. 607 | 0. 136 | 0 Fibroblas·BDKRB1    |
| C11orf96  | 0 2. 01182   | 0. 864 | 0. 465 | 0 Fibroblas·C11orf96  |
| SMPDL3A   | 0 1. 24155   | 0. 822 | 0. 137 | 0 Fibroblas·SMPDL3A   |
| SOWAHC    | 0 -1. 299318 | 0. 267 | 0. 605 | 0 Fibroblas·SOWAHC    |
| TIMP1     | 0 3. 5534666 | 0. 991 | 0. 673 | 0 Fibroblas·TIMP1     |
| CILP      | 0 1. 4925777 | 0. 668 | 0. 056 | 0 Fibroblas·CILP      |
| MGP       | 0 5. 386015  | 0. 988 | 0. 276 | 0 Fibroblas·MGP       |
| DPT       | 0 2. 9184114 | 0. 836 | 0. 053 | 0 Fibroblas·DPT       |
| BASP1     | 0 1. 4131067 | 0. 793 | 0. 166 | 0 Fibroblas·BASP1     |
| CCDC80    | 0 4. 1603701 | 0. 937 | 0. 094 | 0 Fibroblas·CCDC80    |
| FGF7      | 0 1. 3280437 | 0. 666 | 0. 045 | 0 Fibroblas·FGF7      |
| RBP1      | 0 1. 6936301 | 0. 881 | 0. 119 | 0 Fibroblas·RBP1      |
| CD248     | 0 1. 5195228 | 0. 715 | 0. 056 | 0 Fibroblas·CD248     |
| FN1       | 0 1. 540171  | 0. 853 | 0. 147 | 0 Fibroblas·FN1       |
| ADH1B     | 0 1. 7825533 | 0. 769 | 0. 065 | 0 Fibroblas·ADH1B     |
| TIMP3     | 0 2. 2707042 | 0. 895 | 0. 274 | 0 Fibroblas·TIMP3     |
| VCAN      | 0 2. 19523   | 0. 86  | 0. 069 | 0 Fibroblas·VCAN      |
| C7        | 0 1. 5606817 | 0. 777 | 0. 063 | 0 Fibroblas·C7        |
| OGN       | 0 2. 1636335 | 0. 807 | 0. 055 | 0 Fibroblas·OGN       |
| BGN       | 0 2. 1181429 | 0. 844 | 0. 105 | 0 Fibroblas·BGN       |
| TMEM176B  | 0 1. 5651935 | 0. 812 | 0. 145 | 0 Fibroblas·TMEM176B  |
| EMP3      | 0 2. 2485615 | 0. 924 | 0. 194 | 0 Fibroblas·EMP3      |
| COL6A3    | 0 3. 2433583 | 0. 967 | 0. 151 | 0 Fibroblas·COL6A3    |
| IGF1      | 0 2. 2593093 | 0. 784 | 0. 06  | 0 Fibroblas·IGF1      |
| TCF21     | 0 1. 5688606 | 0. 843 | 0. 123 | 0 Fibroblas·TCF21     |
| CYR61     | 0 1. 3028396 | 0. 646 | 0. 136 | 0 Fibroblas·CYR61     |
| C3        | 0 1. 8755212 | 0. 749 | 0. 095 | 0 Fibroblas·C3        |
| HTRA3     | 0 1. 175874  | 0. 592 | 0. 063 | 0 Fibroblas·HTRA3     |
| LINC01082 | 0 1. 0444682 | 0. 79  | 0. 125 | 0 Fibroblas·LINC01082 |
| MMP23B    | 0 1. 6761918 | 0. 814 | 0. 122 | 0 Fibroblas·MMP23B    |
| MATN2     | 0 1. 6137598 | 0. 818 | 0. 101 | 0 Fibroblas·MATN2     |
| EFEMP1    | 0 2. 8817072 | 0. 855 | 0. 077 | 0 Fibroblas·EFEMP1    |
| ABI3BP    | 0 1. 5256339 | 0. 724 | 0. 047 | 0 Fibroblas·ABI3BP    |
| HTRA1     | 0 1. 7545665 | 0. 865 | 0. 101 | 0 Fibroblas·HTRA1     |
| ITM2A     | 0 2. 3637313 | 0. 846 | 0. 127 | 0 Fibroblas·ITM2A     |
| PLAT      | 0 1. 3838696 | 0. 747 | 0. 225 | 0 Fibroblas·PLAT      |
| COL1A1    | 0 4. 4482216 | 0. 973 | 0. 163 | 0 Fibroblas·COL1A1    |
| THY1      | 0 2. 749879  | 0. 878 | 0. 113 | 0 Fibroblas·THY1      |
| RARRES2   | 0 2. 1984658 | 0. 835 | 0. 136 | 0 Fibroblas·RARRES2   |

|          |             |       |       |                      |
|----------|-------------|-------|-------|----------------------|
| TMEM176A | 0 1.2457206 | 0.685 | 0.057 | 0 Fibroblas·TMEM176A |
| SERPINF1 | 0 3.6812893 | 0.96  | 0.102 | 0 Fibroblas·SERPINF1 |
| LUM      | 0 5.4742675 | 0.978 | 0.209 | 0 Fibroblas·LUM      |
| CTSK     | 0 2.1853777 | 0.88  | 0.063 | 0 Fibroblas·CTSK     |
| SPON2    | 0 2.353187  | 0.895 | 0.084 | 0 Fibroblas·SPON2    |
| PDPN     | 0 1.1500692 | 0.646 | 0.123 | 0 Fibroblas·PDPN     |
| PLPP3    | 0 1.4791408 | 0.8   | 0.145 | 0 Fibroblas·PLPP3    |
| FBLN2    | 0 1.5801163 | 0.762 | 0.058 | 0 Fibroblas·FBLN2    |
| COL8A1   | 0 1.1477093 | 0.629 | 0.067 | 0 Fibroblas·COL8A1   |
| MFAP4    | 0 2.8156155 | 0.885 | 0.1   | 0 Fibroblas·MFAP4    |
| NNMT1    | 0 1.610783  | 0.804 | 0.139 | 0 Fibroblas·NNMT     |
| ELN      | 0 1.6582484 | 0.77  | 0.065 | 0 Fibroblas·ELN      |
| C1R      | 0 3.2479591 | 0.963 | 0.126 | 0 Fibroblas·C1R      |
| CALD1    | 0 1.6583073 | 0.995 | 0.254 | 0 Fibroblas·CALD1    |
| COL14A1  | 0 2.1668118 | 0.898 | 0.045 | 0 Fibroblas·COL14A1  |
| GSN      | 0 3.8421753 | 0.974 | 0.333 | 0 Fibroblas·GSN      |
| FSTL1    | 0 2.4877422 | 0.887 | 0.157 | 0 Fibroblas·FSTL1    |
| PLAC9    | 0 3.7678601 | 0.974 | 0.087 | 0 Fibroblas·PLAC9    |
| VAMP8    | 0 -1.59629  | 0.321 | 0.703 | 0 Fibroblas·VAMP8    |
| SLIT3    | 0 1.0485549 | 0.631 | 0.101 | 0 Fibroblas·SLIT3    |
| PLTP     | 0 1.8387061 | 0.877 | 0.093 | 0 Fibroblas·PLTP     |
| SOD3     | 0 2.8393689 | 0.943 | 0.121 | 0 Fibroblas·SOD3     |
| IGFBP4   | 0 3.0646583 | 0.969 | 0.299 | 0 Fibroblas·IGFBP4   |
| HSPB6    | 0 1.2755276 | 0.81  | 0.163 | 0 Fibroblas·HSPB6    |
| FBLN1    | 0 4.2510161 | 0.972 | 0.328 | 0 Fibroblas·FBLN1    |
| COL3A1   | 0 4.0290772 | 0.974 | 0.188 | 0 Fibroblas·COL3A1   |
| PCOLCE   | 0 3.0799144 | 0.932 | 0.068 | 0 Fibroblas·PCOLCE   |
| PTN      | 0 2.0330148 | 0.874 | 0.119 | 0 Fibroblas·PTN      |
| MMP2     | 0 3.1944958 | 0.949 | 0.162 | 0 Fibroblas·MMP2     |
| SPARC    | 0 3.6341137 | 0.981 | 0.186 | 0 Fibroblas·SPARC    |
| CFD1     | 0 4.9472906 | 0.975 | 0.573 | 0 Fibroblas·CFD      |
| LOXL1    | 0 1.0384713 | 0.603 | 0.098 | 0 Fibroblas·LOXL1    |
| COL5A1   | 0 1.350008  | 0.699 | 0.044 | 0 Fibroblas·COL5A1   |
| TFPI     | 0 1.0902823 | 0.883 | 0.338 | 0 Fibroblas·TFPI     |
| OLFML3   | 0 1.7157681 | 0.872 | 0.103 | 0 Fibroblas·OLFML3   |
| NUPR1    | 0 1.9569851 | 0.936 | 0.235 | 0 Fibroblas·NUPR1    |
| ISLR     | 0 1.0660747 | 0.586 | 0.052 | 0 Fibroblas·ISLR     |
| COL1A2   | 0 3.9610052 | 0.985 | 0.191 | 0 Fibroblas·COL1A2   |
| CFH      | 0 1.7595198 | 0.872 | 0.318 | 0 Fibroblas·CFH      |
| SDC2     | 0 1.6889092 | 0.811 | 0.115 | 0 Fibroblas·SDC2     |
| CXCL12   | 0 1.4005215 | 0.833 | 0.047 | 0 Fibroblas·CXCL12   |
| PRRX1    | 0 1.0375804 | 0.65  | 0.047 | 0 Fibroblas·PRRX1    |
| GPNMB    | 0 1.2088701 | 0.87  | 0.3   | 0 Fibroblas·GPNMB    |
| FBN1     | 0 1.9570787 | 0.757 | 0.053 | 0 Fibroblas·FBN1     |
| QSOX1    | 0 1.0328189 | 0.839 | 0.297 | 0 Fibroblas·QSOX1    |
| DCN      | 0 5.3920398 | 0.978 | 0.199 | 0 Fibroblas·DCN      |
| FOS      | 0 1.5491417 | 0.869 | 0.464 | 0 Fibroblas·FOS      |
| LGALS1   | 0 3.6376676 | 0.999 | 0.319 | 0 Fibroblas·LGALS1   |
| IGFBP7   | 0 2.1975243 | 0.974 | 0.4   | 0 Fibroblas·IGFBP7   |
| VIM1     | 0 3.172578  | 0.997 | 0.216 | 0 Fibroblas·VIM      |
| C1S      | 0 2.8582549 | 0.94  | 0.082 | 0 Fibroblas·C1S      |

|           |           |           |       |       |           |                     |
|-----------|-----------|-----------|-------|-------|-----------|---------------------|
| SPARCL11  | 0         | 2.1867304 | 0.956 | 0.174 | 0         | Fibroblas·SPARCL1   |
| GNG111    | 0         | 1.3064716 | 0.839 | 0.111 | 0         | Fibroblas·GNG11     |
| COL6A2    | 0         | 3.473322  | 0.992 | 0.162 | 0         | Fibroblas·COL6A2    |
| SERPING1  | 0         | 2.2612009 | 0.914 | 0.15  | 0         | Fibroblas·SERPING1  |
| TUBA1A    | 0         | 2.07315   | 0.913 | 0.214 | 0         | Fibroblas·TUBA1A    |
| COL6A1    | 0         | 2.5863105 | 0.94  | 0.116 | 0         | Fibroblas·COL6A1    |
| SELM      | 0         | 1.8529339 | 0.973 | 0.262 | 0         | Fibroblas·SELM      |
| CLEC11A   | 0         | 1.9767204 | 0.882 | 0.113 | 0         | Fibroblas·CLEC11A   |
| PMP22     | 0         | 2.1147523 | 0.869 | 0.096 | 0         | Fibroblas·PMP22     |
| JUN       | 0         | 1.4157297 | 0.914 | 0.554 | 0         | Fibroblas·JUN       |
| EGR1      | 0         | 1.0248485 | 0.773 | 0.242 | 0         | Fibroblas·EGR1      |
| IFITM21   | 0         | 1.7451325 | 0.898 | 0.161 | 0         | Fibroblas·IFITM2    |
| MFGES     | 0         | 1.5463695 | 0.741 | 0.122 | 0         | Fibroblas·MFGES     |
| TNXB      | 0         | 1.6140629 | 0.745 | 0.047 | 0         | Fibroblas·TNXB      |
| IFITM31   | 0         | 2.4706339 | 0.998 | 0.567 | 0         | Fibroblas·IFITM3    |
| PRKCDBP   | 0         | 1.7345726 | 0.85  | 0.108 | 0         | Fibroblas·PRKCDBP   |
| FXDY1     | 0         | 1.7859575 | 0.868 | 0.055 | 0         | Fibroblas·FXDY1     |
| SEPP1     | 0         | 1.2651641 | 0.877 | 0.323 | 0         | Fibroblas·SEPP1     |
| AEBP1     | 0         | 1.476945  | 0.787 | 0.075 | 0         | Fibroblas·AEBP1     |
| AKAP12    | 0         | 1.2394203 | 0.739 | 0.153 | 0         | Fibroblas·AKAP12    |
| TIMP2     | 0         | 1.7350803 | 0.86  | 0.162 | 0         | Fibroblas·TIMP2     |
| PLPP1     | 0         | 1.4335226 | 0.874 | 0.276 | 0         | Fibroblas·PLPP1     |
| PTRF1     | 0         | 1.1592484 | 0.782 | 0.182 | 0         | Fibroblas·PTRF      |
| COL5A2    | 0         | 1.4642512 | 0.721 | 0.082 | 0         | Fibroblas·COL5A2    |
| FGFR1     | 0         | 1.1742718 | 0.679 | 0.118 | 0         | Fibroblas·FGFR1     |
| GYPC      | 0         | 1.3968434 | 0.76  | 0.123 | 0         | Fibroblas·GYPC      |
| PRSS23    | 0         | 1.4218756 | 0.742 | 0.226 | 0         | Fibroblas·PRSS23    |
| COX7A1    | 0         | 1.2210434 | 0.747 | 0.134 | 0         | Fibroblas·COX7A1    |
| RCN3      | 0         | 1.2432087 | 0.796 | 0.084 | 0         | Fibroblas·RCN3      |
| CYBRD1    | 0         | 1.420935  | 0.729 | 0.068 | 0         | Fibroblas·CYBRD1    |
| PPIC      | 0         | 1.9974764 | 0.913 | 0.289 | 0         | Fibroblas·PPIC      |
| FBLN5     | 0         | 1.0957273 | 0.648 | 0.04  | 0         | Fibroblas·FBLN5     |
| ECM1      | 0         | 1.1935911 | 0.771 | 0.027 | 0         | Fibroblas·ECM1      |
| SERPINH1  | 0         | 1.6668138 | 0.872 | 0.164 | 0         | Fibroblas·SERPINH1  |
| EFEMP2    | 0         | 1.2836762 | 0.785 | 0.086 | 0         | Fibroblas·EFEMP2    |
| FCGRT     | 0         | 1.5067195 | 0.907 | 0.259 | 0         | Fibroblas·FCGRT     |
| TSPAN4    | 0         | 1.224361  | 0.78  | 0.094 | 0         | Fibroblas·TSPAN4    |
| GPX8      | 0         | 1.1689807 | 0.726 | 0.081 | 0         | Fibroblas·GPX8      |
| GADD45B   | 1.79E-305 | 1.3372725 | 0.792 | 0.407 | 3.59E-302 | Fibroblas·GADD45B   |
| RGS16     | 2.70E-294 | 1.0969972 | 0.613 | 0.159 | 5.40E-291 | Fibroblas·RGS16     |
| C1QTNF3   | 8.52E-292 | 1.1195461 | 0.531 | 0.04  | 1.70E-288 | Fibroblas·C1QTNF3   |
| GEM       | 3.56E-280 | 1.3410398 | 0.614 | 0.119 | 7.13E-277 | Fibroblas·GEM       |
| PRELP     | 1.21E-269 | 1.1179181 | 0.574 | 0.081 | 2.41E-266 | Fibroblas·PRELP     |
| LINC01133 | 3.50E-236 | 1.0725482 | 0.538 | 0.08  | 7.00E-233 | Fibroblas·LINC01133 |
| DES       | 2.16E-234 | -2.554137 | 0.725 | 0.305 | 4.33E-231 | Fibroblas·DES       |
| CYGB      | 1.05E-229 | 1.0550533 | 0.56  | 0.101 | 2.10E-226 | Fibroblas·CYGB      |
| CCL21     | 5.65E-224 | 1.6663389 | 0.65  | 0.197 | 1.13E-220 | Fibroblas·CCL2      |
| GPX3      | 1.15E-222 | 1.264973  | 0.557 | 0.049 | 2.30E-219 | Fibroblas·GPX3      |
| CXCL14    | 1.30E-222 | 2.9807283 | 0.523 | 0.064 | 2.60E-219 | Fibroblas·CXCL14    |
| TPPP3     | 4.22E-189 | 1.4074543 | 0.539 | 0.122 | 8.44E-186 | Fibroblas·TPPP3     |
| ACTG2     | 3.86E-179 | -2.470269 | 0.741 | 0.318 | 7.71E-176 | Fibroblas·ACTG2     |

|           |           |           |       |       |           |           |           |
|-----------|-----------|-----------|-------|-------|-----------|-----------|-----------|
| JCHAIN    | 1.18E-154 | -1.911375 | 0.579 | 0.173 | 2.35E-151 | Fibroblas | JCHAIN    |
| CEBPB     | 3.98E-154 | 1.0061601 | 0.727 | 0.416 | 7.97E-151 | Fibroblas | CEBPB     |
| HLA-DPB11 | 1.91E-128 | -1.134222 | 0.565 | 0.155 | 3.82E-125 | Fibroblas | HLA-DPB1  |
| IGKC      | 2.13E-31  | -4.774407 | 0.616 | 0.312 | 4.26E-28  | Fibroblas | IGKC      |
| HLA-DRB51 | 7.91E-20  | -1.412061 | 0.636 | 0.323 | 1.58E-16  | Fibroblas | HLA-DRB5  |
| PTGDS1    | 0         | -3.384456 | 0.098 | 0.66  |           | 0         | Epithelia |
| PLA2G2A1  | 0         | -3.488188 | 0.11  | 0.586 |           | 0         | Epithelia |
| ACTG21    | 0         | -3.822972 | 0.239 | 0.734 |           | 0         | Epithelia |
| APOE1     | 0         | -3.227118 | 0.146 | 0.636 |           | 0         | Epithelia |
| HLA-DPB12 | 0         | -2.121772 | 0.088 | 0.543 |           | 0         | Epithelia |
| DES1      | 0         | -3.490191 | 0.225 | 0.72  |           | 0         | Epithelia |
| CCL111    | 0         | -1.08245  | 0.103 | 0.594 |           | 0         | Epithelia |
| SPINK1    | 0         | 3.01671   | 0.772 | 0.462 |           | 0         | Epithelia |
| ACTA2     | 0         | -3.14401  | 0.186 | 0.685 |           | 0         | Epithelia |
| RGS161    | 0         | -1.218725 | 0.106 | 0.553 |           | 0         | Epithelia |
| PCP41     | 0         | -2.426553 | 0.137 | 0.677 |           | 0         | Epithelia |
| HLA-DPA11 | 0         | -1.639108 | 0.068 | 0.615 |           | 0         | Epithelia |
| PSCA      | 0         | 2.3866389 | 0.725 | 0.365 |           | 0         | Epithelia |
| MYL9      | 0         | -3.72894  | 0.257 | 0.824 |           | 0         | Epithelia |
| TPM1      | 0         | -3.352459 | 0.272 | 0.783 |           | 0         | Epithelia |
| TPM2      | 0         | -3.840053 | 0.26  | 0.848 |           | 0         | Epithelia |
| TAGLN     | 0         | -4.270883 | 0.274 | 0.687 |           | 0         | Epithelia |
| IGHG11    | 0         | -2.776929 | 0.148 | 0.549 |           | 0         | Epithelia |
| APOD1     | 0         | -1.730086 | 0.156 | 0.656 |           | 0         | Epithelia |
| CCL22     | 0         | -3.226986 | 0.124 | 0.623 |           | 0         | Epithelia |
| MYLK1     | 0         | -2.580644 | 0.157 | 0.671 |           | 0         | Epithelia |
| RGS5      | 0         | -1.205171 | 0.136 | 0.596 |           | 0         | Epithelia |
| MYH111    | 0         | -2.649355 | 0.179 | 0.705 |           | 0         | Epithelia |
| CNN1      | 0         | -2.145741 | 0.148 | 0.57  |           | 0         | Epithelia |
| MT2A2     | 0         | -2.991302 | 0.251 | 0.776 |           | 0         | Epithelia |
| SFRP11    | 0         | -2.547183 | 0.026 | 0.657 |           | 0         | Epithelia |
| CHRD121   | 0         | -1.009716 | 0.11  | 0.641 |           | 0         | Epithelia |
| FXD31     | 0         | 2.6133945 | 0.988 | 0.598 |           | 0         | Epithelia |
| IGHA11    | 0         | -2.603336 | 0.102 | 0.508 |           | 0         | Epithelia |
| MFAP51    | 0         | -2.996083 | 0.051 | 0.575 |           | 0         | Epithelia |
| TNFAIP61  | 0         | -2.725821 | 0.089 | 0.611 |           | 0         | Epithelia |
| SYNM      | 0         | -1.156258 | 0.127 | 0.586 |           | 0         | Epithelia |
| PCOLCE21  | 0         | -1.877751 | 0.062 | 0.557 |           | 0         | Epithelia |
| AGR22     | 0         | 2.5030248 | 0.967 | 0.562 |           | 0         | Epithelia |
| RRAD      | 0         | -1.07985  | 0.139 | 0.572 |           | 0         | Epithelia |
| PI161     | 0         | -2.215307 | 0.07  | 0.554 |           | 0         | Epithelia |
| CTGF1     | 0         | -1.693478 | 0.047 | 0.542 |           | 0         | Epithelia |
| POSTN1    | 0         | -1.065466 | 0.066 | 0.506 |           | 0         | Epithelia |
| SERPINE21 | 0         | -2.60262  | 0.116 | 0.657 |           | 0         | Epithelia |
| SYNPO2    | 0         | -1.417789 | 0.136 | 0.569 |           | 0         | Epithelia |
| KRT72     | 0         | 2.209376  | 0.871 | 0.459 |           | 0         | Epithelia |
| A2M2      | 0         | -2.183523 | 0.168 | 0.83  |           | 0         | Epithelia |
| SNCG      | 0         | 2.3895871 | 0.951 | 0.64  |           | 0         | Epithelia |
| TACSTD2   | 0         | 2.4835243 | 0.977 | 0.61  |           | 0         | Epithelia |
| CTHRC11   | 0         | -1.397203 | 0.031 | 0.54  |           | 0         | Epithelia |
| MEG31     | 0         | -1.923306 | 0.04  | 0.631 |           | 0         | Epithelia |

|           |             |       |       |                       |
|-----------|-------------|-------|-------|-----------------------|
| CSRP1     | 0 -1.374185 | 0.183 | 0.639 | 0 Epithelia\CSRP1     |
| SPINT21   | 0 1.7560154 | 0.873 | 0.544 | 0 Epithelia\SPINT2    |
| IGFBP51   | 0 -2.917133 | 0.401 | 0.797 | 0 Epithelia\IGFBP5    |
| IGFBP61   | 0 -3.224921 | 0.122 | 0.676 | 0 Epithelia\IGFBP6    |
| IGHM1     | 0 -1.657247 | 0.114 | 0.547 | 0 Epithelia\IGHM      |
| SFRP21    | 0 -4.129773 | 0.094 | 0.701 | 0 Epithelia\SFRP2     |
| SRPX1     | 0 -1.234458 | 0.02  | 0.642 | 0 Epithelia\SRPX      |
| RAMP1     | 0 -1.165665 | 0.106 | 0.712 | 0 Epithelia\RAMP1     |
| TSTD11    | 0 1.3951099 | 0.714 | 0.28  | 0 Epithelia\TSTD1     |
| C11orf961 | 0 -1.844539 | 0.423 | 0.803 | 0 Epithelia\C11orf96  |
| PHLDA2    | 0 2.3560913 | 0.978 | 0.659 | 0 Epithelia\PHLDA2    |
| LINC00152 | 0 -1.156249 | 0.154 | 0.625 | 0 Epithelia\LINC00152 |
| SOWAHC1   | 0 1.2663477 | 0.643 | 0.314 | 0 Epithelia\SOWAHC    |
| CILP1     | 0 -1.223645 | 0.03  | 0.513 | 0 Epithelia\CILP      |
| MGP1      | 0 -5.832094 | 0.211 | 0.864 | 0 Epithelia\MGP       |
| DPT1      | 0 -2.588117 | 0.035 | 0.613 | 0 Epithelia\DPT       |
| BASP11    | 0 -1.395692 | 0.122 | 0.662 | 0 Epithelia\BASP1     |
| CCDC801   | 0 -3.965446 | 0.074 | 0.699 | 0 Epithelia\CCDC80    |
| FGF71     | 0 -1.13217  | 0.02  | 0.507 | 0 Epithelia\FGF7      |
| RBP11     | 0 -1.55687  | 0.083 | 0.693 | 0 Epithelia\RBP1      |
| CD2481    | 0 -1.253843 | 0.028 | 0.549 | 0 Epithelia\CD248     |
| FN11      | 0 -2.458646 | 0.07  | 0.751 | 0 Epithelia\FN1       |
| ADH1B1    | 0 -1.457214 | 0.049 | 0.57  | 0 Epithelia\ADH1B     |
| TIMP31    | 0 -1.995188 | 0.259 | 0.72  | 0 Epithelia\TIMP3     |
| VCAN1     | 0 -1.970235 | 0.037 | 0.657 | 0 Epithelia\VCAN      |
| C71       | 0 -1.359678 | 0.031 | 0.599 | 0 Epithelia\C7        |
| OGN1      | 0 -1.851862 | 0.031 | 0.603 | 0 Epithelia\OGN       |
| BGN1      | 0 -1.795679 | 0.084 | 0.639 | 0 Epithelia\BGN       |
| TMEM176B1 | 0 -1.382473 | 0.115 | 0.646 | 0 Epithelia\TMEM176B  |
| EMP31     | 0 -2.509401 | 0.11  | 0.825 | 0 Epithelia\EMP3      |
| COL6A31   | 0 -3.09384  | 0.095 | 0.795 | 0 Epithelia\COL6A3    |
| IGF11     | 0 -1.956651 | 0.027 | 0.603 | 0 Epithelia\IGF1      |
| TCF211    | 0 -1.295146 | 0.097 | 0.654 | 0 Epithelia\TCF21     |
| CTSH      | 0 1.3364695 | 0.719 | 0.384 | 0 Epithelia\CTSH      |
| C31       | 0 -1.57942  | 0.08  | 0.563 | 0 Epithelia\C3        |
| MMP23B1   | 0 -1.466903 | 0.083 | 0.655 | 0 Epithelia\MMP23B    |
| MATN21    | 0 -1.349591 | 0.069 | 0.639 | 0 Epithelia\MATN2     |
| EFEMP11   | 0 -2.584758 | 0.049 | 0.649 | 0 Epithelia\EFEMP1    |
| CAV11     | 0 -1.902257 | 0.137 | 0.662 | 0 Epithelia\CAV1      |
| ABI3BP1   | 0 -1.242873 | 0.03  | 0.532 | 0 Epithelia\ABI3BP    |
| HTRA11    | 0 -1.586875 | 0.056 | 0.692 | 0 Epithelia\HTRA1     |
| ITM2A1    | 0 -2.176619 | 0.086 | 0.68  | 0 Epithelia\ITM2A     |
| COL1A11   | 0 -4.654939 | 0.113 | 0.793 | 0 Epithelia\COL1A1    |
| THY11     | 0 -2.439101 | 0.085 | 0.677 | 0 Epithelia\THY1      |
| RARRES21  | 0 -2.289522 | 0.079 | 0.702 | 0 Epithelia\RARRES2   |
| TMEM176A1 | 0 -1.071057 | 0.022 | 0.539 | 0 Epithelia\TMEM176A  |
| TXNDC17   | 0 1.5922032 | 0.875 | 0.509 | 0 Epithelia\TXNDC17   |
| SERPINF11 | 0 -3.360431 | 0.076 | 0.726 | 0 Epithelia\SERPINF1  |
| LUM1      | 0 -5.520532 | 0.188 | 0.764 | 0 Epithelia\LUM       |
| CTSK1     | 0 -1.880768 | 0.035 | 0.662 | 0 Epithelia\CTSK      |
| SPON21    | 0 -2.021446 | 0.057 | 0.676 | 0 Epithelia\SPON2     |



|           |              |        |        |                      |
|-----------|--------------|--------|--------|----------------------|
| PLPP31    | 0 -1. 356192 | 0. 106 | 0. 653 | 0 Epithelia\PLPP3    |
| FBLN21    | 0 -1. 378947 | 0. 032 | 0. 578 | 0 Epithelia\FBLN2    |
| MFAP41    | 0 -2. 589537 | 0. 068 | 0. 685 | 0 Epithelia\MFAP4    |
| NNMT2     | 0 -1. 969264 | 0. 061 | 0. 715 | 0 Epithelia\NNMT     |
| ELN1      | 0 -1. 496241 | 0. 029 | 0. 602 | 0 Epithelia\ELN      |
| C1R1      | 0 -3. 002423 | 0. 084 | 0. 761 | 0 Epithelia\C1R      |
| CALD11    | 0 -3. 860477 | 0. 152 | 0. 922 | 0 Epithelia\CALD1    |
| COL14A11  | 0 -1. 828175 | 0. 02  | 0. 665 | 0 Epithelia\COL14A1  |
| GSN1      | 0 -4. 000793 | 0. 262 | 0. 883 | 0 Epithelia\GSN      |
| FSTL11    | 0 -2. 442109 | 0. 098 | 0. 748 | 0 Epithelia\FSTL1    |
| PLAC91    | 0 -3. 519841 | 0. 055 | 0. 74  | 0 Epithelia\PLAC9    |
| VAMP81    | 0 1. 4456252 | 0. 756 | 0. 359 | 0 Epithelia\VAMP8    |
| PLTP1     | 0 -1. 55649  | 0. 058 | 0. 681 | 0 Epithelia\PLTP     |
| SOD31     | 0 -2. 913984 | 0. 059 | 0. 779 | 0 Epithelia\SOD3     |
| IGFBP41   | 0 -2. 961041 | 0. 247 | 0. 838 | 0 Epithelia\IGFBP4   |
| HSPB61    | 0 -1. 88706  | 0. 087 | 0. 724 | 0 Epithelia\HSPB6    |
| FBLN11    | 0 -3. 886262 | 0. 336 | 0. 752 | 0 Epithelia\FBLN1    |
| COL3A11   | 0 -4. 442375 | 0. 115 | 0. 839 | 0 Epithelia\COL3A1   |
| PCOLCE1   | 0 -2. 713931 | 0. 053 | 0. 679 | 0 Epithelia\PCOLCE   |
| PTN1      | 0 -1. 702959 | 0. 101 | 0. 661 | 0 Epithelia\PTN      |
| MMP21     | 0 -2. 83592  | 0. 148 | 0. 717 | 0 Epithelia\MMP2     |
| SPARC1    | 0 -4. 050659 | 0. 102 | 0. 86  | 0 Epithelia\SPARC    |
| COL5A11   | 0 -1. 170636 | 0. 023 | 0. 522 | 0 Epithelia\COL5A1   |
| OLFML31   | 0 -1. 450236 | 0. 061 | 0. 693 | 0 Epithelia\OLFML3   |
| NUPR11    | 0 -2. 306214 | 0. 16  | 0. 831 | 0 Epithelia\NUPR1    |
| GEM1      | 0 -1. 345052 | 0. 067 | 0. 537 | 0 Epithelia\GEM      |
| COL1A21   | 0 -4. 510668 | 0. 126 | 0. 835 | 0 Epithelia\COL1A2   |
| CFH1      | 0 -1. 377805 | 0. 318 | 0. 693 | 0 Epithelia\CFH      |
| SDC21     | 0 -1. 516264 | 0. 08  | 0. 645 | 0 Epithelia\SDC2     |
| CXCL121   | 0 -1. 208847 | 0. 026 | 0. 613 | 0 Epithelia\CXCL12   |
| CYSTM1    | 0 1. 8635313 | 0. 973 | 0. 663 | 0 Epithelia\CYSTM1   |
| GADD45B1  | 0 -1. 672451 | 0. 347 | 0. 765 | 0 Epithelia\GADD45B  |
| FBN11     | 0 -1. 687724 | 0. 029 | 0. 569 | 0 Epithelia\FBN1     |
| DCN1      | 0 -5. 476808 | 0. 162 | 0. 787 | 0 Epithelia\DCN      |
| FOS1      | 0 -1. 511006 | 0. 428 | 0. 796 | 0 Epithelia\FOS      |
| LGALS11   | 0 -4. 991387 | 0. 215 | 0. 95  | 0 Epithelia\LGALS1   |
| IGFBP72   | 0 -3. 560515 | 0. 322 | 0. 914 | 0 Epithelia\IGFBP7   |
| VIM2      | 0 -4. 18817  | 0. 107 | 0. 923 | 0 Epithelia\VIM      |
| C1S1      | 0 -2. 624027 | 0. 043 | 0. 726 | 0 Epithelia\C1S      |
| SPARCL12  | 0 -3. 191911 | 0. 073 | 0. 868 | 0 Epithelia\SPARCL1  |
| GNG112    | 0 -1. 853198 | 0. 035 | 0. 727 | 0 Epithelia\GNG11    |
| COL6A21   | 0 -3. 627504 | 0. 089 | 0. 843 | 0 Epithelia\COL6A2   |
| SERPING11 | 0 -2. 115354 | 0. 088 | 0. 768 | 0 Epithelia\SERPING1 |
| TUBA1A1   | 0 -2. 435328 | 0. 131 | 0. 822 | 0 Epithelia\TUBA1A   |
| COL6A11   | 0 -2. 522518 | 0. 058 | 0. 767 | 0 Epithelia\COL6A1   |
| SELM1     | 0 -2. 778871 | 0. 169 | 0. 895 | 0 Epithelia\SELM     |
| CLEC11A1  | 0 -1. 646516 | 0. 078 | 0. 689 | 0 Epithelia\CLEC11A  |
| PMP221    | 0 -1. 975098 | 0. 035 | 0. 718 | 0 Epithelia\PMP22    |
| 1-Jun     | 0 -1. 402587 | 0. 532 | 0. 833 | 0 Epithelia\JUN      |
| EGR11     | 0 -1. 279118 | 0. 191 | 0. 684 | 0 Epithelia\EGR1     |
| IFITM22   | 0 -1. 960427 | 0. 107 | 0. 749 | 0 Epithelia\IFITM2   |

|           |           |           |       |       |           |           |          |
|-----------|-----------|-----------|-------|-------|-----------|-----------|----------|
| KLF21     | 0         | -1.091949 | 0.128 | 0.555 | 0         | Epithelia | KLF2     |
| MFGES1    | 0         | -1.47662  | 0.086 | 0.6   | 0         | Epithelia | MFGES    |
| TNXB1     | 0         | -1.349061 | 0.025 | 0.556 | 0         | Epithelia | TNXB     |
| IFITM3    | 0         | -2.830348 | 0.517 | 0.94  | 0         | Epithelia | IFITM3   |
| CTSL      | 0         | -1.00704  | 0.19  | 0.714 | 0         | Epithelia | CTSL     |
| PRKCDBP1  | 0         | -1.792141 | 0.052 | 0.702 | 0         | Epithelia | PRKCDBP  |
| FXYD11    | 0         | -1.5483   | 0.032 | 0.643 | 0         | Epithelia | FXYD1    |
| COL4A2    | 0         | -1.307657 | 0.105 | 0.629 | 0         | Epithelia | COL4A2   |
| SEPP1     | 0         | -1.088773 | 0.329 | 0.688 | 0         | Epithelia | SEPP1    |
| AEBP1     | 0         | -1.374563 | 0.032 | 0.626 | 0         | Epithelia | AEBP1    |
| AKAP121   | 0         | -1.433725 | 0.083 | 0.664 | 0         | Epithelia | AKAP12   |
| TIMP21    | 0         | -1.831336 | 0.095 | 0.742 | 0         | Epithelia | TIMP2    |
| PLPP1     | 0         | -1.182296 | 0.258 | 0.711 | 0         | Epithelia | PLPP1    |
| PTRF2     | 0         | -1.71294  | 0.1   | 0.721 | 0         | Epithelia | PTRF     |
| COL5A21   | 0         | -1.311166 | 0.052 | 0.564 | 0         | Epithelia | COL5A2   |
| FGFR11    | 0         | -1.114224 | 0.065 | 0.585 | 0         | Epithelia | FGFR1    |
| GYP1      | 0         | -1.435936 | 0.061 | 0.656 | 0         | Epithelia | GYP1     |
| PRSS231   | 0         | -1.573043 | 0.172 | 0.663 | 0         | Epithelia | PRSS23   |
| COX7A11   | 0         | -1.6509   | 0.058 | 0.673 | 0         | Epithelia | COX7A1   |
| CYBRD11   | 0         | -1.241132 | 0.033 | 0.573 | 0         | Epithelia | CYBRD1   |
| PPIC1     | 0         | -1.90453  | 0.239 | 0.794 | 0         | Epithelia | PPIC     |
| PKIG      | 0         | -1.006462 | 0.132 | 0.631 | 0         | Epithelia | PKIG     |
| SERPINH11 | 0         | -1.467905 | 0.124 | 0.709 | 0         | Epithelia | SERPINH1 |
| EFEMP21   | 0         | -1.109954 | 0.043 | 0.63  | 0         | Epithelia | EFEMP2   |
| FCGRT1    | 0         | -1.454033 | 0.219 | 0.762 | 0         | Epithelia | FCGRT    |
| TSPAN41   | 0         | -1.141079 | 0.053 | 0.625 | 0         | Epithelia | TSPAN4   |
| ACTC1     | 1.53E-302 | -1.522205 | 0.136 | 0.548 | 3.06E-299 | Epithelia | ACTC1    |
| CYR611    | 2.34E-284 | -1.406717 | 0.099 | 0.541 | 4.69E-281 | Epithelia | CYR61    |
| CLIC4     | 7.95E-284 | -1.044283 | 0.098 | 0.545 | 1.59E-280 | Epithelia | CLIC4    |
| MAP1B     | 3.69E-281 | -1.053143 | 0.128 | 0.55  | 7.37E-278 | Epithelia | MAP1B    |
| BDKRB11   | 3.99E-278 | -1.228715 | 0.108 | 0.5   | 7.98E-275 | Epithelia | BDKRB1   |
| SPRY11    | 5.90E-271 | -1.100414 | 0.113 | 0.523 | 1.18E-267 | Epithelia | SPRY1    |
| COL4A1    | 5.46E-245 | -1.140175 | 0.103 | 0.528 | 1.09E-241 | Epithelia | COL4A1   |
| PALLD     | 7.14E-244 | -1.321478 | 0.153 | 0.567 | 1.43E-240 | Epithelia | PALLD    |
| PLAT1     | 2.72E-243 | -1.07885  | 0.219 | 0.589 | 5.44E-240 | Epithelia | PLAT     |
| JCHAIN1   | 3.91E-230 | -2.70234  | 0.136 | 0.507 | 7.82E-227 | Epithelia | JCHAIN   |
| FHL1      | 4.32E-218 | -1.224551 | 0.049 | 0.501 | 8.64E-215 | Epithelia | FHL1     |
| PDLIM7    | 4.73E-198 | -1.036312 | 0.139 | 0.539 | 9.45E-195 | Epithelia | PDLIM7   |
| CRYAB     | 1.45E-194 | -1.190452 | 0.083 | 0.5   | 2.89E-191 | Epithelia | CRYAB    |
| FLNA      | 4.71E-192 | -1.703683 | 0.174 | 0.568 | 9.42E-189 | Epithelia | FLNA     |
| HLA-DRB52 | 1.35E-138 | -1.028754 | 0.276 | 0.612 | 2.71E-135 | Epithelia | HLA-DRB5 |
| DERL3     | 9.02E-103 | 2.1014336 | 0.864 | 0.139 | 1.80E-99  | B_cells   | DERL3    |
| MZB1      | 2.03E-94  | 3.805643  | 1     | 0.263 | 4.06E-91  | B_cells   | MZB1     |
| IGKV1-12  | 3.73E-92  | 4.0436898 | 0.795 | 0.138 | 7.45E-89  | B_cells   | IGKV1-12 |
| JCHAIN2   | 9.68E-84  | 8.2976138 | 1     | 0.273 | 1.94E-80  | B_cells   | JCHAIN   |
| IGKC1     | 1.13E-55  | 11.146061 | 0.932 | 0.387 | 2.25E-52  | B_cells   | IGKC     |
| SRGN      | 1.61E-44  | 2.1370931 | 0.852 | 0.192 | 3.23E-41  | B_cells   | SRGN     |
| CD79A     | 4.34E-44  | 2.1368271 | 0.727 | 0.12  | 8.67E-41  | B_cells   | CD79A    |
| SEC11C    | 2.26E-41  | 1.8524031 | 0.852 | 0.287 | 4.53E-38  | B_cells   | SEC11C   |
| IGKV3-15  | 4.40E-40  | 1.725619  | 0.716 | 0.262 | 8.79E-37  | B_cells   | IGKV3-15 |
| ADIRF     | 4.08E-38  | -3.178994 | 0.477 | 0.944 | 8.16E-35  | B_cells   | ADIRF    |

|           |          |           |       |       |          |         |           |
|-----------|----------|-----------|-------|-------|----------|---------|-----------|
| CYTIP     | 7.79E-37 | 1.0214472 | 0.636 | 0.153 | 1.56E-33 | B_cells | CYTIP     |
| IGHM2     | 1.94E-34 | 6.9972857 | 0.693 | 0.277 | 3.88E-31 | B_cells | IGHM      |
| PPDPF     | 3.39E-34 | -1.924269 | 0.489 | 0.93  | 6.78E-31 | B_cells | PPDPF     |
| CD9       | 6.27E-34 | -2.088227 | 0.511 | 0.948 | 1.25E-30 | B_cells | CD9       |
| CD27      | 9.00E-34 | 1.0122751 | 0.557 | 0.072 | 1.80E-30 | B_cells | CD27      |
| IGHG12    | 4.77E-33 | 8.2900865 | 0.705 | 0.298 | 9.54E-30 | B_cells | IGHG1     |
| IGHG4     | 1.86E-30 | 8.5941292 | 0.67  | 0.25  | 3.72E-27 | B_cells | IGHG4     |
| MGST11    | 2.96E-30 | -2.134562 | 0.443 | 0.844 | 5.91E-27 | B_cells | MGST1     |
| DNAAF1    | 3.56E-29 | 1.4170049 | 0.534 | 0.123 | 7.11E-26 | B_cells | DNAAF1    |
| SOD2      | 9.38E-29 | -2.26139  | 0.477 | 0.862 | 1.88E-25 | B_cells | SOD2      |
| LINC00152 | 1.11E-28 | 1.4648201 | 0.83  | 0.33  | 2.23E-25 | B_cells | LINC00152 |
| IER3      | 3.83E-28 | -2.220049 | 0.466 | 0.862 | 7.66E-25 | B_cells | IER3      |
| PKM       | 5.79E-28 | -1.638476 | 0.455 | 0.887 | 1.16E-24 | B_cells | PKM       |
| C9orf16   | 6.84E-26 | -1.670593 | 0.557 | 0.893 | 1.37E-22 | B_cells | C9orf16   |
| LDHB      | 1.85E-24 | -1.286564 | 0.409 | 0.888 | 3.70E-21 | B_cells | LDHB      |
| CYB5A     | 2.69E-24 | -1.724328 | 0.409 | 0.804 | 5.39E-21 | B_cells | CYB5A     |
| SNCG1     | 3.62E-24 | -2.578677 | 0.42  | 0.835 | 7.24E-21 | B_cells | SNCG      |
| KRT191    | 8.60E-24 | -2.945209 | 0.58  | 0.892 | 1.72E-20 | B_cells | KRT19     |
| AGR23     | 2.60E-23 | -2.399277 | 0.364 | 0.816 | 5.20E-20 | B_cells | AGR2      |
| FABP5     | 4.15E-23 | -2.864732 | 0.534 | 0.899 | 8.29E-20 | B_cells | FABP5     |
| TACSTD21  | 4.31E-23 | -2.323951 | 0.409 | 0.84  | 8.62E-20 | B_cells | TACSTD2   |
| KRT81     | 7.50E-23 | -2.027362 | 0.375 | 0.824 | 1.50E-19 | B_cells | KRT8      |
| PHLDA21   | 8.83E-23 | -2.223649 | 0.477 | 0.859 | 1.77E-19 | B_cells | PHLDA2    |
| KRT131    | 4.08E-22 | -2.910372 | 0.511 | 0.862 | 8.16E-19 | B_cells | KRT13     |
| TXNDC171  | 5.99E-22 | -1.707723 | 0.239 | 0.739 | 1.20E-18 | B_cells | TXNDC17   |
| HIST1H1C  | 1.12E-21 | 1.3348897 | 0.705 | 0.346 | 2.24E-18 | B_cells | HIST1H1C  |
| FXYD32    | 1.62E-21 | -2.430501 | 0.511 | 0.841 | 3.24E-18 | B_cells | FXYD3     |
| IGFBP2    | 2.01E-21 | -1.929687 | 0.398 | 0.791 | 4.02E-18 | B_cells | IGFBP2    |
| AKR1C21   | 2.74E-21 | -1.913544 | 0.455 | 0.799 | 5.48E-18 | B_cells | AKR1C2    |
| KRT181    | 5.31E-21 | -2.024873 | 0.42  | 0.809 | 1.06E-17 | B_cells | KRT18     |
| PERP      | 1.65E-20 | -1.696926 | 0.432 | 0.8   | 3.30E-17 | B_cells | PERP      |
| IGHA12    | 2.20E-20 | 8.0838336 | 0.614 | 0.255 | 4.41E-17 | B_cells | IGHA1     |
| SPINT22   | 3.88E-20 | -1.532851 | 0.295 | 0.751 | 7.76E-17 | B_cells | SPINT2    |
| C19orf331 | 4.67E-20 | -1.796673 | 0.386 | 0.783 | 9.35E-17 | B_cells | C19orf33  |
| GPRC5A1   | 7.56E-20 | -1.729398 | 0.432 | 0.762 | 1.51E-16 | B_cells | GPRC5A    |
| SFN1      | 1.17E-19 | -2.488299 | 0.477 | 0.82  | 2.34E-16 | B_cells | SFN       |
| MDK       | 4.51E-19 | -1.533782 | 0.307 | 0.674 | 9.02E-16 | B_cells | MDK       |
| LY6D1     | 6.36E-19 | -2.892074 | 0.523 | 0.834 | 1.27E-15 | B_cells | LY6D      |
| MGST2     | 7.15E-19 | -1.503632 | 0.375 | 0.74  | 1.43E-15 | B_cells | MGST2     |
| PHLDA1    | 7.95E-19 | -1.834884 | 0.443 | 0.782 | 1.59E-15 | B_cells | PHLDA1    |
| ENO1      | 1.13E-18 | -1.16895  | 0.341 | 0.757 | 2.26E-15 | B_cells | ENO1      |
| KLF51     | 4.80E-18 | -1.780056 | 0.398 | 0.761 | 9.60E-15 | B_cells | KLF5      |
| EMP1      | 5.32E-18 | -1.663556 | 0.33  | 0.671 | 1.06E-14 | B_cells | EMP1      |
| HEBP2     | 7.51E-18 | -1.1719   | 0.307 | 0.739 | 1.50E-14 | B_cells | HEBP2     |
| GPX21     | 1.04E-17 | -2.00341  | 0.466 | 0.809 | 2.08E-14 | B_cells | GPX2      |
| SMIM221   | 9.88E-16 | -1.693365 | 0.386 | 0.73  | 1.98E-12 | B_cells | SMIM22    |
| ETS2      | 1.97E-15 | -1.33626  | 0.375 | 0.696 | 3.94E-12 | B_cells | ETS2      |
| FAM162A   | 2.04E-15 | -1.084198 | 0.386 | 0.734 | 4.07E-12 | B_cells | FAM162A   |
| SERPINB51 | 3.38E-15 | -1.457574 | 0.386 | 0.724 | 6.77E-12 | B_cells | SERPINB5  |
| LRRFIP1   | 1.18E-14 | -1.258676 | 0.33  | 0.725 | 2.35E-11 | B_cells | LRRFIP1   |
| IGFBP73   | 1.19E-14 | -2.606519 | 0.205 | 0.551 | 2.39E-11 | B_cells | IGFBP7    |

|             |            |            |        |        |            |            |             |
|-------------|------------|------------|--------|--------|------------|------------|-------------|
| MAST4       | 2. 61E-14  | -1. 320732 | 0. 284 | 0. 653 | 5. 22E-11  | B_cells    | MAST4       |
| TSC22D1     | 1. 09E-13  | -1. 296151 | 0. 261 | 0. 64  | 2. 18E-10  | B_cells    | TSC22D1     |
| TIMP11      | 2. 09E-12  | -2. 471624 | 0. 455 | 0. 758 | 4. 18E-09  | B_cells    | TIMP1       |
| LGALS12     | 0. 0603353 | -1. 861244 | 0. 83  | 0. 493 | 1          | B_cells    | LGALS1      |
| PTPRC       | 6. 33E-149 | 1. 6842981 | 0. 727 | 0. 102 | 1. 27E-145 | T_cells    | PTPRC       |
| SRGN1       | 4. 95E-137 | 1. 7653709 | 0. 909 | 0. 183 | 9. 91E-134 | T_cells    | SRGN        |
| CD7         | 1. 41E-113 | 1. 4989636 | 0. 711 | 0. 17  | 2. 82E-110 | T_cells    | CD7         |
| CCL5        | 1. 10E-109 | 3. 3364297 | 0. 74  | 0. 107 | 2. 20E-106 | T_cells    | CCL5        |
| CD52        | 1. 55E-106 | 1. 8667379 | 0. 723 | 0. 115 | 3. 10E-103 | T_cells    | CD52        |
| CD3D        | 4. 39E-106 | 1. 8417475 | 0. 64  | 0. 05  | 8. 78E-103 | T_cells    | CD3D        |
| TRBC1       | 2. 76E-97  | 1. 6034135 | 0. 624 | 0. 107 | 5. 52E-94  | T_cells    | TRBC1       |
| CXCR4       | 5. 18E-93  | 1. 7741436 | 0. 669 | 0. 107 | 1. 04E-89  | T_cells    | CXCR4       |
| HCST        | 5. 66E-86  | 1. 7988911 | 0. 599 | 0. 078 | 1. 13E-82  | T_cells    | HCST        |
| CD2         | 8. 33E-83  | 1. 5778222 | 0. 607 | 0. 146 | 1. 67E-79  | T_cells    | CD2         |
| CD69        | 8. 19E-79  | 1. 3522142 | 0. 591 | 0. 114 | 1. 64E-75  | T_cells    | CD69        |
| CD3E        | 1. 43E-74  | 1. 1688134 | 0. 583 | 0. 12  | 2. 85E-71  | T_cells    | CD3E        |
| TRBC2       | 1. 87E-68  | 1. 5633328 | 0. 579 | 0. 06  | 3. 74E-65  | T_cells    | TRBC2       |
| TRAC        | 5. 81E-67  | 1. 5756673 | 0. 603 | 0. 12  | 1. 16E-63  | T_cells    | TRAC        |
| AC092580. 4 | 1. 28E-66  | 1. 3765119 | 0. 57  | 0. 079 | 2. 55E-63  | T_cells    | AC092580. 4 |
| CREM        | 2. 22E-66  | 1. 3852195 | 0. 888 | 0. 452 | 4. 45E-63  | T_cells    | CREM        |
| COR01A      | 2. 20E-63  | 1. 413063  | 0. 55  | 0. 102 | 4. 41E-60  | T_cells    | COR01A      |
| IL32        | 4. 26E-63  | 2. 4133781 | 0. 702 | 0. 282 | 8. 53E-60  | T_cells    | IL32        |
| RGS1        | 6. 89E-62  | 1. 3857141 | 0. 591 | 0. 091 | 1. 38E-58  | T_cells    | RGS1        |
| IL2RG       | 2. 31E-61  | 1. 0670785 | 0. 554 | 0. 122 | 4. 62E-58  | T_cells    | IL2RG       |
| CST7        | 2. 16E-54  | 1. 1650933 | 0. 525 | 0. 058 | 4. 32E-51  | T_cells    | CST7        |
| NKG7        | 2. 63E-50  | 1. 9561448 | 0. 562 | 0. 149 | 5. 26E-47  | T_cells    | NKG7        |
| ALOX5AP     | 1. 56E-48  | 1. 028269  | 0. 558 | 0. 111 | 3. 11E-45  | T_cells    | ALOX5AP     |
| ARHGDIB     | 3. 19E-44  | 1. 2885209 | 0. 789 | 0. 452 | 6. 38E-41  | T_cells    | ARHGDIB     |
| IL7R        | 7. 29E-31  | 1. 2046833 | 0. 517 | 0. 158 | 1. 46E-27  | T_cells    | IL7R        |
| SDS         | 0          | 2. 2137675 | 0. 869 | 0. 153 | 0          | Monocyte_c | SDS         |
| MMP9        | 0          | 1. 2712564 | 0. 81  | 0. 045 | 0          | Monocyte_c | MMP9        |
| SRGN2       | 3. 83E-292 | 4. 5100366 | 0. 997 | 0. 175 | 7. 65E-289 | Monocyte_c | SRGN        |
| LYZ         | 3. 20E-279 | 4. 652962  | 0. 929 | 0. 063 | 6. 40E-276 | Monocyte_c | LYZ         |
| TYROBP      | 6. 71E-279 | 4. 0061224 | 0. 935 | 0. 048 | 1. 34E-275 | Monocyte_c | TYROBP      |
| FCER1G      | 4. 74E-269 | 3. 159808  | 0. 912 | 0. 038 | 9. 48E-266 | Monocyte_c | FCER1G      |
| AIF1        | 1. 67E-267 | 2. 8283883 | 0. 912 | 0. 078 | 3. 34E-264 | Monocyte_c | AIF1        |
| C1QC        | 1. 60E-266 | 2. 3738594 | 0. 81  | 0. 016 | 3. 21E-263 | Monocyte_c | C1QC        |
| C1QB        | 2. 11E-263 | 3. 110663  | 0. 83  | 0. 015 | 4. 22E-260 | Monocyte_c | C1QB        |
| CCR7        | 9. 45E-263 | 1. 5429371 | 0. 812 | 0. 059 | 1. 89E-259 | Monocyte_c | CCR7        |
| HLA-DQA11   | 5. 58E-259 | 4. 037803  | 0. 938 | 0. 129 | 1. 12E-255 | Monocyte_c | HLA-DQA1    |
| HLA-DPB13   | 5. 74E-258 | 5. 0539742 | 0. 972 | 0. 242 | 1. 15E-254 | Monocyte_c | HLA-DPB1    |
| CST71       | 9. 89E-254 | 1. 5948887 | 0. 818 | 0. 047 | 1. 98E-250 | Monocyte_c | CST7        |
| HLA-DPA12   | 3. 41E-251 | 4. 3809692 | 0. 952 | 0. 259 | 6. 82E-248 | Monocyte_c | HLA-DPA1    |
| FCER1A      | 1. 47E-248 | 1. 2902683 | 0. 608 | 0. 002 | 2. 94E-245 | Monocyte_c | FCER1A      |
| HLA-DRA1    | 2. 29E-246 | 4. 9992694 | 0. 994 | 0. 281 | 4. 57E-243 | Monocyte_c | HLA-DRA     |
| C1QA        | 5. 95E-243 | 3. 3489484 | 0. 844 | 0. 024 | 1. 19E-239 | Monocyte_c | C1QA        |
| C15orf48    | 7. 24E-241 | 3. 5043465 | 0. 929 | 0. 156 | 1. 45E-237 | Monocyte_c | C15orf48    |
| GPR183      | 2. 19E-239 | 3. 4339396 | 0. 892 | 0. 064 | 4. 38E-236 | Monocyte_c | GPR183      |
| HLA-DRB53   | 1. 48E-229 | 3. 4692385 | 0. 994 | 0. 389 | 2. 96E-226 | Monocyte_c | HLA-DRB5    |
| HLA-DQB11   | 4. 85E-228 | 4. 2346477 | 0. 943 | 0. 215 | 9. 69E-225 | Monocyte_c | HLA-DQB1    |
| HLA-DRB11   | 1. 37E-222 | 3. 944887  | 0. 98  | 0. 323 | 2. 73E-219 | Monocyte_c | HLA-DRB1    |

|               |            |            |        |        |            |           |               |
|---------------|------------|------------|--------|--------|------------|-----------|---------------|
| CLEC10A       | 3. 24E-218 | 1. 4879792 | 0. 699 | 0. 012 | 6. 49E-215 | Monocyte_ | CLEC10A       |
| VM01          | 3. 14E-215 | 1. 7824465 | 0. 824 | 0. 151 | 6. 27E-212 | Monocyte_ | VM01          |
| DNASE1L3      | 1. 21E-211 | 1. 494473  | 0. 784 | 0. 153 | 2. 41E-208 | Monocyte_ | DNASE1L3      |
| CD741         | 1. 66E-196 | 4. 1576292 | 1      | 0. 6   | 3. 32E-193 | Monocyte_ | CD74          |
| LST1          | 1. 02E-189 | 2. 5588406 | 0. 838 | 0. 045 | 2. 03E-186 | Monocyte_ | LST1          |
| HLA-DMA1      | 2. 82E-186 | 2. 1988294 | 0. 898 | 0. 223 | 5. 63E-183 | Monocyte_ | HLA-DMA       |
| MS4A6A        | 2. 58E-171 | 1. 9947493 | 0. 787 | 0. 04  | 5. 16E-168 | Monocyte_ | MS4A6A        |
| OLR1          | 1. 11E-162 | 1. 4273274 | 0. 759 | 0. 147 | 2. 21E-159 | Monocyte_ | OLR1          |
| EREG          | 1. 03E-146 | 3. 0818487 | 0. 747 | 0. 032 | 2. 05E-143 | Monocyte_ | EREG          |
| HLA-DMB       | 2. 88E-145 | 1. 3251034 | 0. 713 | 0. 047 | 5. 77E-142 | Monocyte_ | HLA-DMB       |
| CREM1         | 1. 88E-140 | 2. 3624535 | 0. 963 | 0. 447 | 3. 76E-137 | Monocyte_ | CREM          |
| MMP19         | 3. 51E-138 | 1. 0649613 | 0. 73  | 0. 099 | 7. 02E-135 | Monocyte_ | MMP19         |
| MS4A7         | 2. 18E-128 | 1. 6327493 | 0. 676 | 0. 026 | 4. 37E-125 | Monocyte_ | MS4A7         |
| GOS2          | 1. 83E-126 | 3. 0511177 | 0. 906 | 0. 385 | 3. 67E-123 | Monocyte_ | GOS2          |
| LAPTM5        | 2. 62E-125 | 1. 7649771 | 0. 747 | 0. 043 | 5. 23E-122 | Monocyte_ | LAPTM5        |
| SERPINB9      | 4. 83E-117 | 1. 9597853 | 0. 756 | 0. 18  | 9. 66E-114 | Monocyte_ | SERPINB9      |
| CD83          | 4. 36E-115 | 1. 7219033 | 0. 747 | 0. 206 | 8. 73E-112 | Monocyte_ | CD83          |
| SPP1          | 2. 21E-114 | 1. 7012299 | 0. 648 | 0. 13  | 4. 42E-111 | Monocyte_ | SPP1          |
| SAMSN1        | 6. 04E-108 | 1. 7423411 | 0. 705 | 0. 046 | 1. 21E-104 | Monocyte_ | SAMSN1        |
| EMP32         | 6. 91E-104 | 1. 3634824 | 0. 929 | 0. 369 | 1. 38E-100 | Monocyte_ | EMP3          |
| CSF2RA        | 6. 88E-96  | 1. 2141063 | 0. 668 | 0. 098 | 1. 38E-92  | Monocyte_ | CSF2RA        |
| RGS2          | 7. 51E-93  | 1. 7965775 | 0. 747 | 0. 169 | 1. 50E-89  | Monocyte_ | RGS2          |
| PLEK          | 2. 54E-91  | 1. 4631046 | 0. 651 | 0. 014 | 5. 09E-88  | Monocyte_ | PLEK          |
| BASP12        | 5. 39E-91  | 1. 2221352 | 0. 841 | 0. 315 | 1. 08E-87  | Monocyte_ | BASP1         |
| C5AR1         | 7. 93E-91  | 1. 0367089 | 0. 642 | 0. 08  | 1. 59E-87  | Monocyte_ | C5AR1         |
| PLAUR         | 2. 92E-83  | 1. 4989995 | 0. 912 | 0. 532 | 5. 83E-80  | Monocyte_ | PLAUR         |
| CXCL16        | 1. 74E-82  | 1. 2365426 | 0. 824 | 0. 37  | 3. 48E-79  | Monocyte_ | CXCL16        |
| RP11-1143G9.4 | 9. 01E-82  | 1. 3538665 | 0. 631 | 0. 065 | 1. 80E-78  | Monocyte_ | RP11-1143G9.4 |
| CXCL3         | 3. 82E-81  | 2. 5403488 | 0. 767 | 0. 322 | 7. 65E-78  | Monocyte_ | CXCL3         |
| HCST1         | 2. 30E-80  | 1. 3459015 | 0. 676 | 0. 072 | 4. 60E-77  | Monocyte_ | HCST          |
| BCL2A1        | 3. 05E-80  | 1. 9273884 | 0. 656 | 0. 053 | 6. 11E-77  | Monocyte_ | BCL2A1        |
| JCHAIN3       | 4. 72E-78  | -1. 622427 | 0. 716 | 0. 266 | 9. 45E-75  | Monocyte_ | JCHAIN        |
| CLEC7A        | 1. 10E-73  | 1. 1477624 | 0. 594 | 0. 055 | 2. 21E-70  | Monocyte_ | CLEC7A        |
| CTSL1         | 1. 31E-71  | 1. 3059362 | 0. 861 | 0. 378 | 2. 62E-68  | Monocyte_ | CTSL          |
| IL1B          | 7. 29E-71  | 2. 2578719 | 0. 705 | 0. 213 | 1. 46E-67  | Monocyte_ | IL1B          |
| IGSF6         | 1. 13E-69  | 1. 1339799 | 0. 597 | 0. 079 | 2. 27E-66  | Monocyte_ | IGSF6         |
| IGHG41        | 3. 75E-68  | -2. 019854 | 0. 707 | 0. 241 | 7. 50E-65  | Monocyte_ | IGHG4         |
| PCP42         | 5. 56E-68  | -1. 338077 | 0. 747 | 0. 332 | 1. 11E-64  | Monocyte_ | PCP4          |
| INSIG11       | 6. 99E-68  | 1. 3808992 | 0. 821 | 0. 376 | 1. 40E-64  | Monocyte_ | INSIG1        |
| CTSS          | 1. 22E-67  | 1. 4882786 | 0. 815 | 0. 475 | 2. 44E-64  | Monocyte_ | CTSS          |
| LGALS2        | 5. 75E-67  | 1. 3927004 | 0. 565 | 0. 01  | 1. 15E-63  | Monocyte_ | LGALS2        |
| CXCL21        | 1. 93E-65  | 1. 2519588 | 0. 864 | 0. 451 | 3. 85E-62  | Monocyte_ | CXCL2         |
| RGS11         | 5. 69E-59  | 1. 7696007 | 0. 619 | 0. 086 | 1. 14E-55  | Monocyte_ | RGS1          |
| ITGB2         | 8. 60E-57  | 1. 0118585 | 0. 602 | 0. 075 | 1. 72E-53  | Monocyte_ | ITGB2         |
| ID2           | 2. 82E-56  | 1. 5001083 | 0. 767 | 0. 364 | 5. 63E-53  | Monocyte_ | ID2           |
| CPVL          | 3. 22E-56  | 1. 5478216 | 0. 67  | 0. 224 | 6. 45E-53  | Monocyte_ | CPVL          |
| IGHA13        | 3. 02E-54  | -1. 588084 | 0. 67  | 0. 246 | 6. 03E-51  | Monocyte_ | IGHA1         |
| IGKC2         | 3. 50E-51  | -3. 981527 | 0. 781 | 0. 381 | 6. 99E-48  | Monocyte_ | IGKC          |
| FGL2          | 4. 90E-47  | 1. 0285583 | 0. 693 | 0. 296 | 9. 80E-44  | Monocyte_ | FGL2          |
| FCN1          | 4. 60E-45  | 1. 1764397 | 0. 514 | 0. 022 | 9. 19E-42  | Monocyte_ | FCN1          |
| SPI1          | 1. 47E-38  | 1. 1375962 | 0. 543 | 0. 022 | 2. 94E-35  | Monocyte_ | SPI1          |

|          |           |           |       |       |           |            |          |
|----------|-----------|-----------|-------|-------|-----------|------------|----------|
| CCL3     | 9.14E-36  | 2.486751  | 0.528 | 0.057 | 1.83E-32  | Monocyte_c | CCL3     |
| IGHG13   | 1.14E-34  | -1.823251 | 0.636 | 0.292 | 2.27E-31  | Monocyte_c | IGHG1    |
| CXCR41   | 1.62E-32  | 1.12075   | 0.554 | 0.106 | 3.25E-29  | Monocyte_c | CXCR4    |
| MYH112   | 2.11E-27  | -1.627176 | 0.73  | 0.37  | 4.21E-24  | Monocyte_c | MYH11    |
| FAM26F   | 3.19E-26  | 1.0913656 | 0.543 | 0.147 | 6.37E-23  | Monocyte_c | FAM26F   |
| JAML     | 6.83E-23  | 1.0176488 | 0.506 | 0.05  | 1.37E-19  | Monocyte_c | JAML     |
| RNASE6   | 4.99E-22  | 1.1854835 | 0.52  | 0.075 | 9.98E-19  | Monocyte_c | RNASE6   |
| RGS10    | 2.89E-19  | 1.0042753 | 0.599 | 0.265 | 5.78E-16  | Monocyte_c | RGS10    |
| ACTG22   | 3.63E-17  | -2.651627 | 0.764 | 0.419 | 7.26E-14  | Monocyte_c | ACTG2    |
| DES2     | 1.32E-16  | -2.413718 | 0.75  | 0.405 | 2.63E-13  | Monocyte_c | DES      |
| CNN11    | 5.28E-16  | -1.182671 | 0.622 | 0.301 | 1.06E-12  | Monocyte_c | CNN1     |
| ACTA21   | 1.38E-15  | -1.825293 | 0.73  | 0.367 | 2.76E-12  | Monocyte_c | ACTA2    |
| ALOX5AP1 | 4.75E-15  | 1.3033542 | 0.5   | 0.109 | 9.49E-12  | Monocyte_c | ALOX5AP  |
| APOC1    | 1.12E-14  | 1.4983441 | 0.554 | 0.238 | 2.24E-11  | Monocyte_c | APOC1    |
| ACTG23   | 0         | 6.6097999 | 1     | 0.4   | 0         | Smooth_mu: | ACTG2    |
| DES3     | 0         | 6.3908863 | 1     | 0.386 | 0         | Smooth_mu: | DES      |
| ACTA22   | 0         | 4.9034472 | 1     | 0.346 | 0         | Smooth_mu: | ACTA2    |
| PCP43    | 0         | 5.200022  | 0.981 | 0.313 | 0         | Smooth_mu: | PCP4     |
| ACTC11   | 0         | 4.042585  | 0.864 | 0.266 | 0         | Smooth_mu: | ACTC1    |
| MYL91    | 0         | 5.490399  | 1     | 0.448 | 0         | Smooth_mu: | MYL9     |
| TPM11    | 0         | 5.2370574 | 1     | 0.442 | 0         | Smooth_mu: | TPM1     |
| TPM21    | 0         | 5.7737995 | 1     | 0.46  | 0         | Smooth_mu: | TPM2     |
| TAGLN1   | 0         | 5.9120234 | 1     | 0.405 | 0         | Smooth_mu: | TAGLN    |
| MYLK2    | 0         | 5.1173276 | 1     | 0.322 | 0         | Smooth_mu: | MYLK     |
| MYH113   | 0         | 5.196913  | 1     | 0.35  | 0         | Smooth_mu: | MYH11    |
| CNN12    | 0         | 4.6390379 | 0.997 | 0.276 | 0         | Smooth_mu: | CNN1     |
| PPP1R14A | 0         | 4.2086205 | 0.984 | 0.219 | 0         | Smooth_mu: | PPP1R14A |
| SYNM1    | 0         | 3.4370616 | 0.932 | 0.272 | 0         | Smooth_mu: | SYNM     |
| SMTN     | 0         | 3.2627129 | 0.898 | 0.227 | 0         | Smooth_mu: | SMTN     |
| SYNP021  | 0         | 3.6701761 | 0.958 | 0.27  | 0         | Smooth_mu: | SYNP02   |
| CSRP11   | 0         | 3.4967428 | 0.969 | 0.328 | 0         | Smooth_mu: | CSRP1    |
| RAMP11   | 0         | 2.584655  | 0.856 | 0.313 | 0         | Smooth_mu: | RAMP1    |
| PALLD1   | 0         | 2.9363263 | 0.942 | 0.281 | 0         | Smooth_mu: | PALLD    |
| FN12     | 0         | 2.5473464 | 0.919 | 0.301 | 0         | Smooth_mu: | FN1      |
| SORBS1   | 0         | 2.4310925 | 0.788 | 0.201 | 0         | Smooth_mu: | SORBS1   |
| FHL11    | 0         | 2.3002403 | 0.819 | 0.193 | 0         | Smooth_mu: | FHL1     |
| FLNA1    | 0         | 3.7408624 | 0.974 | 0.293 | 0         | Smooth_mu: | FLNA     |
| CKB      | 0         | 2.601891  | 0.945 | 0.476 | 0         | Smooth_mu: | CKB      |
| CALD12   | 0         | 3.4511065 | 1     | 0.419 | 0         | Smooth_mu: | CALD1    |
| LPP      | 0         | 3.1801937 | 0.974 | 0.414 | 0         | Smooth_mu: | LPP      |
| SVIL     | 0         | 2.4056324 | 0.864 | 0.297 | 0         | Smooth_mu: | SVIL     |
| SELM2    | 0         | 2.3552784 | 0.977 | 0.42  | 0         | Smooth_mu: | SELM     |
| TNS1     | 2.00E-294 | 2.2393472 | 0.782 | 0.217 | 3.99E-291 | Smooth_mu: | TNS1     |
| CAV12    | 2.67E-294 | 2.1267775 | 0.895 | 0.311 | 5.33E-291 | Smooth_mu: | CAV1     |
| PDLIM71  | 1.41E-293 | 2.2549533 | 0.822 | 0.266 | 2.83E-290 | Smooth_mu: | PDLIM7   |
| HSPB62   | 3.80E-288 | 2.2747748 | 0.868 | 0.304 | 7.60E-285 | Smooth_mu: | HSPB6    |
| PPP1R12B | 8.43E-286 | 2.1721348 | 0.763 | 0.185 | 1.69E-282 | Smooth_mu: | PPP1R12B |
| PKIG1    | 1.40E-272 | 2.2877365 | 0.808 | 0.299 | 2.79E-269 | Smooth_mu: | PKIG     |
| PDLIM3   | 1.40E-248 | 2.0282849 | 0.729 | 0.198 | 2.80E-245 | Smooth_mu: | PDLIM3   |
| SORBS2   | 4.05E-239 | 2.3009825 | 0.724 | 0.249 | 8.10E-236 | Smooth_mu: | SORBS2   |
| CRYAB1   | 3.33E-231 | 2.071205  | 0.724 | 0.219 | 6.65E-228 | Smooth_mu: | CRYAB    |

|           |            |            |        |        |            |                    |
|-----------|------------|------------|--------|--------|------------|--------------------|
| RGS51     | 1. 30E-227 | 2. 7845489 | 0. 729 | 0. 291 | 2. 59E-224 | Smooth_mu:RGS5     |
| MAP1B1    | 4. 49E-223 | 1. 9572404 | 0. 737 | 0. 268 | 8. 98E-220 | Smooth_mu:MAP1B    |
| LMOD1     | 3. 23E-222 | 1. 9839639 | 0. 664 | 0. 197 | 6. 47E-219 | Smooth_mu:LMOD1    |
| CLIC41    | 2. 28E-219 | 1. 9954825 | 0. 714 | 0. 248 | 4. 56E-216 | Smooth_mu:CLIC4    |
| FILIP1    | 7. 50E-215 | 2. 0031188 | 0. 635 | 0. 17  | 1. 50E-211 | Smooth_mu:FILIP1   |
| FLNC      | 3. 49E-208 | 1. 9977894 | 0. 63  | 0. 171 | 6. 99E-205 | Smooth_mu:FLNC     |
| PTRF3     | 8. 22E-207 | 1. 8196126 | 0. 782 | 0. 316 | 1. 64E-203 | Smooth_mu:PTRF     |
| PLN       | 3. 26E-201 | 2. 147012  | 0. 654 | 0. 248 | 6. 52E-198 | Smooth_mu:PLN      |
| COL4A21   | 1. 95E-199 | 1. 9357733 | 0. 721 | 0. 285 | 3. 91E-196 | Smooth_mu:COL4A2   |
| HOPX      | 4. 32E-199 | 2. 1392364 | 0. 612 | 0. 168 | 8. 63E-196 | Smooth_mu:HOPX     |
| COX7A12   | 4. 80E-198 | 1. 7736964 | 0. 74  | 0. 271 | 9. 59E-195 | Smooth_mu:COX7A1   |
| NUPR12    | 9. 07E-187 | 1. 5626341 | 0. 866 | 0. 395 | 1. 81E-183 | Smooth_mu:NUPR1    |
| COL4A11   | 1. 85E-186 | 1. 992503  | 0. 669 | 0. 246 | 3. 70E-183 | Smooth_mu:COL4A1   |
| IGFBP74   | 7. 20E-184 | 1. 4543433 | 0. 971 | 0. 528 | 1. 44E-180 | Smooth_mu:IGFBP7   |
| ADIRF1    | 1. 02E-168 | -1. 988945 | 0. 515 | 0. 962 | 2. 05E-165 | Smooth_mu:ADIRF    |
| ITGA5     | 4. 12E-167 | 1. 6339506 | 0. 559 | 0. 157 | 8. 24E-164 | Smooth_mu:ITGA5    |
| AQP31     | 1. 92E-164 | -2. 064272 | 0. 37  | 0. 922 | 3. 84E-161 | Smooth_mu:AQP3     |
| KRT192    | 6. 29E-164 | -2. 299237 | 0. 383 | 0. 915 | 1. 26E-160 | Smooth_mu:KRT19    |
| PTGS1     | 3. 52E-162 | 1. 673683  | 0. 504 | 0. 123 | 7. 05E-159 | Smooth_mu:PTGS1    |
| S100P     | 1. 09E-161 | -2. 423716 | 0. 498 | 0. 947 | 2. 17E-158 | Smooth_mu:S100P    |
| KRT182    | 1. 21E-160 | -1. 668414 | 0. 22  | 0. 834 | 2. 42E-157 | Smooth_mu:KRT18    |
| LGALS13   | 2. 36E-160 | 1. 1309054 | 1      | 0. 471 | 4. 73E-157 | Smooth_mu:LGALS1   |
| FABP51    | 4. 76E-160 | -2. 092174 | 0. 352 | 0. 923 | 9. 52E-157 | Smooth_mu:FABP5    |
| SFN2      | 9. 82E-158 | -1. 971438 | 0. 241 | 0. 845 | 1. 96E-154 | Smooth_mu:SFN      |
| SLMAP     | 3. 71E-156 | 1. 7279406 | 0. 698 | 0. 363 | 7. 42E-153 | Smooth_mu:SLMAP    |
| FXYD33    | 2. 35E-155 | -1. 93786  | 0. 296 | 0. 865 | 4. 70E-152 | Smooth_mu:FXYD3    |
| AKR1C22   | 2. 73E-154 | -1. 580099 | 0. 218 | 0. 825 | 5. 46E-151 | Smooth_mu:AKR1C2   |
| C19orf332 | 4. 21E-154 | -1. 526192 | 0. 199 | 0. 808 | 8. 42E-151 | Smooth_mu:C19orf33 |
| GPX22     | 5. 26E-154 | -1. 601698 | 0. 228 | 0. 834 | 1. 05E-150 | Smooth_mu:GPX2     |
| SPARCL13  | 2. 27E-152 | 1. 0486111 | 0. 872 | 0. 353 | 4. 54E-149 | Smooth_mu:SPARCL1  |
| SNCG2     | 1. 58E-151 | -1. 940264 | 0. 276 | 0. 859 | 3. 16E-148 | Smooth_mu:SNCG     |
| TACSTD22  | 1. 59E-149 | -1. 935798 | 0. 288 | 0. 863 | 3. 17E-146 | Smooth_mu:TACSTD2  |
| KRT17     | 6. 91E-147 | -2. 309224 | 0. 412 | 0. 924 | 1. 38E-143 | Smooth_mu:KRT17    |
| KRT132    | 2. 59E-146 | -2. 051697 | 0. 328 | 0. 886 | 5. 17E-143 | Smooth_mu:KRT13    |
| KCNMB1    | 1. 81E-145 | 1. 630595  | 0. 557 | 0. 206 | 3. 62E-142 | Smooth_mu:KCNMB1   |
| PHLDA22   | 1. 82E-145 | -1. 946379 | 0. 334 | 0. 881 | 3. 64E-142 | Smooth_mu:PHLDA2   |
| AGR24     | 4. 25E-144 | -1. 913628 | 0. 25  | 0. 84  | 8. 50E-141 | Smooth_mu:AGR2     |
| NEXN      | 4. 69E-144 | 1. 5745803 | 0. 548 | 0. 194 | 9. 37E-141 | Smooth_mu:NEXN     |
| HSPG21    | 2. 34E-136 | 1. 5489818 | 0. 572 | 0. 214 | 4. 67E-133 | Smooth_mu:HSPG2    |
| GAS6      | 2. 94E-136 | 1. 4010159 | 0. 556 | 0. 194 | 5. 87E-133 | Smooth_mu:GAS6     |
| A2M3      | 1. 28E-135 | 1. 4601261 | 0. 745 | 0. 405 | 2. 55E-132 | Smooth_mu:A2M      |
| CCL24     | 9. 16E-135 | 2. 3216197 | 0. 666 | 0. 298 | 1. 83E-131 | Smooth_mu:CCL2     |
| LY6D2     | 5. 84E-134 | -2. 103964 | 0. 312 | 0. 857 | 1. 17E-130 | Smooth_mu:LY6D     |
| SERPINB52 | 6. 49E-133 | -1. 183983 | 0. 166 | 0. 748 | 1. 30E-129 | Smooth_mu:SERPINB5 |
| CXCL8     | 1. 18E-132 | -2. 201451 | 0. 373 | 0. 889 | 2. 37E-129 | Smooth_mu:CXCL8    |
| IGFBP21   | 5. 34E-131 | -1. 537868 | 0. 249 | 0. 815 | 1. 07E-127 | Smooth_mu:IGFBP2   |
| AREG      | 7. 54E-130 | -1. 92462  | 0. 242 | 0. 816 | 1. 51E-126 | Smooth_mu:AREG     |
| SMIM222   | 1. 36E-127 | -1. 363714 | 0. 179 | 0. 755 | 2. 72E-124 | Smooth_mu:SMIM22   |
| RARRES22  | 2. 06E-127 | 1. 113014  | 0. 716 | 0. 298 | 4. 12E-124 | Smooth_mu:RARRES2  |
| FABP4     | 3. 08E-126 | -2. 103362 | 0. 439 | 0. 923 | 6. 16E-123 | Smooth_mu:FABP4    |
| CYSTM11   | 1. 99E-123 | -1. 494568 | 0. 402 | 0. 877 | 3. 97E-120 | Smooth_mu:CYSTM1   |

|          |           |           |       |       |           |                    |
|----------|-----------|-----------|-------|-------|-----------|--------------------|
| CAPG     | 6.95E-120 | -1.125882 | 0.129 | 0.683 | 1.39E-116 | Smooth_mu:CAPG     |
| HPGD1    | 7.28E-120 | -1.480592 | 0.204 | 0.759 | 1.46E-116 | Smooth_mu:HPGD     |
| DHRS21   | 1.41E-119 | -1.785662 | 0.231 | 0.776 | 2.83E-116 | Smooth_mu:DHRS2    |
| MPZL2    | 6.47E-119 | -1.120132 | 0.16  | 0.723 | 1.29E-115 | Smooth_mu:MPZL2    |
| MGST12   | 8.65E-119 | -1.224667 | 0.388 | 0.863 | 1.73E-115 | Smooth_mu:MGST1    |
| LAMB31   | 9.64E-116 | -1.137818 | 0.171 | 0.718 | 1.93E-112 | Smooth_mu:LAMB3    |
| S100A2   | 1.25E-114 | -2.391003 | 0.491 | 0.928 | 2.51E-111 | Smooth_mu:S100A2   |
| KLF52    | 6.97E-114 | -1.182901 | 0.234 | 0.784 | 1.39E-110 | Smooth_mu:KLF5     |
| S100A41  | 1.38E-113 | -2.031026 | 0.305 | 0.764 | 2.75E-110 | Smooth_mu:S100A4   |
| CLDN7    | 5.50E-112 | -1.338183 | 0.141 | 0.698 | 1.10E-108 | Smooth_mu:CLDN7    |
| CFD2     | 4.40E-111 | -3.319641 | 0.204 | 0.7   | 8.80E-108 | Smooth_mu:CFD      |
| FAM3B1   | 2.88E-106 | -1.066621 | 0.16  | 0.688 | 5.75E-103 | Smooth_mu:FAM3B    |
| ANXA101  | 1.30E-105 | -1.07635  | 0.147 | 0.676 | 2.61E-102 | Smooth_mu:ANXA10   |
| TUBA1A2  | 7.77E-104 | 1.222717  | 0.727 | 0.379 | 1.55E-100 | Smooth_mu:TUBA1A   |
| EZR1     | 1.04E-102 | -1.201656 | 0.378 | 0.844 | 2.07E-99  | Smooth_mu:EZR      |
| PRSS232  | 2.93E-101 | 1.0915889 | 0.675 | 0.344 | 5.86E-98  | Smooth_mu:PRSS23   |
| CDC42EP5 | 3.53E-100 | -1.083002 | 0.15  | 0.665 | 7.06E-97  | Smooth_mu:CDC42EP5 |
| CLDN41   | 4.04E-100 | -2.032216 | 0.286 | 0.777 | 8.09E-97  | Smooth_mu:CLDN4    |
| KRT73    | 9.22E-100 | -1.775827 | 0.213 | 0.738 | 1.84E-96  | Smooth_mu:KRT7     |
| PMAIP1   | 1.86E-98  | -1.118676 | 0.199 | 0.716 | 3.72E-95  | Smooth_mu:PMAIP1   |
| HLA-B    | 7.08E-98  | -1.363871 | 0.596 | 0.926 | 1.42E-94  | Smooth_mu:HLA-B    |
| PERP1    | 1.83E-95  | -1.109463 | 0.341 | 0.819 | 3.66E-92  | Smooth_mu:PERP     |
| KRT82    | 3.53E-95  | -1.263291 | 0.394 | 0.842 | 7.07E-92  | Smooth_mu:KRT8     |
| DUSP5    | 4.28E-95  | -1.146458 | 0.317 | 0.812 | 8.56E-92  | Smooth_mu:DUSP5    |
| CRABP2   | 1.64E-94  | -1.321935 | 0.132 | 0.613 | 3.28E-91  | Smooth_mu:CRABP2   |
| EMP11    | 2.26E-91  | -1.22536  | 0.2   | 0.691 | 4.53E-88  | Smooth_mu:EMP1     |
| DUOXA2   | 8.59E-88  | -1.261611 | 0.136 | 0.621 | 1.72E-84  | Smooth_mu:DUOXA2   |
| TSPAN1   | 1.02E-87  | -1.120411 | 0.16  | 0.661 | 2.04E-84  | Smooth_mu:TSPAN1   |
| ELF3     | 3.88E-87  | -1.412503 | 0.184 | 0.686 | 7.76E-84  | Smooth_mu:ELF3     |
| C9orf161 | 4.98E-87  | -1.039489 | 0.593 | 0.905 | 9.95E-84  | Smooth_mu:C9orf16  |
| HN11     | 8.72E-87  | -1.254374 | 0.199 | 0.703 | 1.74E-83  | Smooth_mu:HN1      |
| LYPD31   | 1.02E-84  | -1.01322  | 0.105 | 0.584 | 2.04E-81  | Smooth_mu:LYPD3    |
| HMGAI    | 3.42E-84  | -1.08943  | 0.342 | 0.803 | 6.85E-81  | Smooth_mu:HMGAI    |
| PHLDA11  | 3.81E-83  | -1.280291 | 0.342 | 0.801 | 7.63E-80  | Smooth_mu:PHLDA1   |
| VSIG2    | 9.32E-83  | -1.042509 | 0.123 | 0.613 | 1.86E-79  | Smooth_mu:VSIG2    |
| CD742    | 1.82E-73  | -2.004872 | 0.179 | 0.632 | 3.64E-70  | Smooth_mu:CD74     |
| MMP1     | 1.31E-69  | -1.479761 | 0.121 | 0.543 | 2.61E-66  | Smooth_mu:MMP1     |
| SLPI     | 1.38E-68  | -1.546295 | 0.116 | 0.565 | 2.76E-65  | Smooth_mu:SLPI     |
| TXNDC172 | 1.97E-67  | -1.126484 | 0.33  | 0.755 | 3.94E-64  | Smooth_mu:TXNDC17  |
| HES4     | 2.00E-67  | -1.064664 | 0.373 | 0.777 | 4.01E-64  | Smooth_mu:HES4     |
| FBLN12   | 3.24E-67  | -2.71215  | 0.116 | 0.513 | 6.48E-64  | Smooth_mu:FBLN1    |
| PLIN2    | 3.87E-64  | -1.006115 | 0.183 | 0.617 | 7.75E-61  | Smooth_mu:PLIN2    |
| SPINK11  | 1.40E-63  | -2.236172 | 0.242 | 0.673 | 2.80E-60  | Smooth_mu:SPINK1   |
| GDF15    | 8.12E-63  | -1.426796 | 0.165 | 0.576 | 1.62E-59  | Smooth_mu:GDF15    |
| VAMP82   | 1.48E-58  | -1.211587 | 0.162 | 0.626 | 2.96E-55  | Smooth_mu:VAMP8    |
| HES1     | 9.43E-54  | -1.541323 | 0.202 | 0.594 | 1.89E-50  | Smooth_mu:HES1     |
| PSCA1    | 6.47E-51  | -1.925238 | 0.192 | 0.607 | 1.29E-47  | Smooth_mu:PSCA     |
| CCL20    | 1.31E-50  | -1.593518 | 0.166 | 0.561 | 2.62E-47  | Smooth_mu:CCL20    |
| TSTD12   | 1.01E-41  | -1.033013 | 0.142 | 0.568 | 2.03E-38  | Smooth_mu:TSTD1    |
| DKK1     | 4.88E-40  | -1.440604 | 0.157 | 0.547 | 9.76E-37  | Smooth_mu:DKK1     |
| TM4SF11  | 3.52E-37  | -1.004361 | 0.205 | 0.557 | 7.04E-34  | Smooth_mu:TM4SF1   |
