# Supplementary material for: Comprehensive analysis of scRNA-Seq and bulk RNA-Seq reveals dynamic changes in the tumor immune microenvironment of bladder cancer and establishes a prognostic model
Source: Springer Nature journal article supplement (doi:10.1186/s12967-023-04056-z), 2023-03-27
Supplement: MOESM11 [file 24738572]

| probes  | moduleColor | GS. IDD      | p. GS. IDD  | MEbrown      | MEbrown     |
|---------|-------------|--------------|-------------|--------------|-------------|
| MFS3    | brown       | 0.364637168  | 5.73E-15    | -0.525506455 | 6.71E-32    |
| ESM1    | brown       | 0.30799055   | 6.69E-11    | -0.270231243 | 1.24E-08    |
| TOMM40  | brown       | 0.351119675  | 6.39E-14    | -0.588242927 | 2.21E-41    |
| LHX5    | brown       | 0.157096968  | 0.00108132  | -0.194022966 | 5.12E-05    |
| MYOM2   | brown       | -0.537213589 | 1.61E-33    | 0.586076023  | 5.09E-41    |
| SPCS2   | brown       | 0.215827354  | 6.31E-06    | -0.274979919 | 6.73E-09    |
| SETDB2  | brown       | -0.10312656  | 0.032520298 | 0.302713664  | 1.46E-10    |
| COX17   | brown       | 0.277426023  | 4.88E-09    | -0.334641389 | 1.04E-12    |
| FANK1   | brown       | 0.187505344  | 9.17E-05    | -0.230928515 | 1.30E-06    |
| PTPRB   | brown       | -0.11035711  | 0.022094044 | 0.405483779  | 1.90E-18    |
| TRABD2B | brown       | -0.234198697 | 9.07E-07    | 0.377277438  | 5.41E-16    |
| SLC2A1  | brown       | 0.122305456  | 0.011138178 | -0.370636689 | 1.89E-15    |
| GLYCTK  | brown       | 0.206737867  | 1.55E-05    | -0.221297209 | 3.60E-06    |
| KCNE4   | brown       | -0.333452069 | 1.26E-12    | 0.763926791  | 1.91E-83    |
| HOXC13  | brown       | 0.190971067  | 6.74E-05    | -0.2761926   | 5.74E-09    |
| NME2    | brown       | 0.125078317  | 0.009422479 | -0.231816611 | 1.18E-06    |
| PHLDA2  | brown       | 0.031541308  | 0.514199313 | -0.303491407 | 1.30E-10    |
| EPHA3   | brown       | -0.427695488 | 1.50E-20    | 0.766499213  | 2.49E-84    |
| C1orf35 | brown       | 0.365892545  | 4.55E-15    | -0.584230368 | 1.03E-40    |
| PDE5A   | brown       | -0.411569267 | 5.22E-19    | 0.754489887  | 2.70E-80    |
| PLIN4   | brown       | -0.306277418 | 8.63E-11    | 0.389952842  | 4.56E-17    |
| HEY2    | brown       | -0.127411798 | 0.008165105 | 0.355398352  | 3.01E-14    |
| ACOX2   | brown       | -0.456211717 | 1.72E-23    | 0.743458124  | 8.63E-77    |
| OR51E2  | brown       | -0.028615689 | 0.553996926 | 0.342946464  | 2.60E-13    |
| ASB2    | brown       | -0.482268742 | 1.98E-26    | 0.740926369  | 5.19E-76    |
| EXOSC7  | brown       | 0.218905519  | 4.61E-06    | -0.430010958 | 8.83E-21    |
| FAM86C1 | brown       | 0.221943002  | 3.37E-06    | -0.278294635 | 4.35E-09    |
| SH3D21  | brown       | 0.210265274  | 1.10E-05    | -0.309809003 | 5.10E-11    |
| PPP4C   | brown       | 0.356716772  | 2.39E-14    | -0.566748487 | 6.65E-38    |
| JAKMIP3 | brown       | -0.160128854 | 0.000861113 | 0.297459186  | 3.11E-10    |
| ALDOA   | brown       | 0.128956147  | 0.007417479 | -0.395433914 | 1.51E-17    |
| RCAN3   | brown       | 0.240346743  | 4.57E-07    | -0.291651045 | 7.06E-10    |
| LCN6    | brown       | -0.43309584  | 4.36E-21    | 0.580621563  | 4.05E-40    |
| MED31   | brown       | 0.173005814  | 0.000312999 | -0.348584506 | 9.91E-14    |
| LEMD2   | brown       | 0.404226618  | 2.47E-18    | -0.460821904 | 5.41E-24    |
| FAM69B  | brown       | -0.046252493 | 0.338651848 | 0.17073553   | 0.000376133 |
| MPLKIP  | brown       | 0.359942899  | 1.34E-14    | -0.434863872 | 2.89E-21    |
| MRPL22  | brown       | 0.225939691  | 2.21E-06    | -0.3790607   | 3.84E-16    |
| GALNT16 | brown       | -0.20796216  | 1.38E-05    | 0.478368709  | 5.65E-26    |
| NLGN3   | brown       | -0.21893783  | 4.59E-06    | 0.373005658  | 1.21E-15    |
| ITGB6   | brown       | 0.178887489  | 0.000192384 | -0.274959462 | 6.74E-09    |
| SLC18A2 | brown       | -0.186165192 | 0.000103106 | 0.495342335  | 5.29E-28    |
| DENND5A | brown       | -0.263185578 | 3.03E-08    | 0.680729028  | 7.92E-60    |
| ADCY2   | brown       | -0.321683529 | 8.28E-12    | 0.476643415  | 8.96E-26    |
| EIF3I   | brown       | 0.234848675  | 8.44E-07    | -0.451202899 | 5.91E-23    |
| PDE1C   | brown       | -0.52110252  | 2.63E-31    | 0.811692071  | 5.35E-102   |
| PRG4    | brown       | -0.097840942 | 0.042577114 | 0.417782468  | 1.36E-19    |
| PCDHGA2 | brown       | -0.149516901 | 0.001877747 | 0.390280959  | 4.27E-17    |
| TULP2   | brown       | -0.191353034 | 6.51E-05    | 0.301763937  | 1.67E-10    |
| POU6F1  | brown       | -0.303579036 | 1.28E-10    | 0.670459439  | 1.90E-57    |

|            |       |              |             |              |             |
|------------|-------|--------------|-------------|--------------|-------------|
| CSPG4      | brown | -0.223593493 | 2.83E-06    | 0.546057544  | 8.69E-35    |
| PLP1       | brown | -0.693532981 | 6.19E-63    | 0.729553505  | 1.27E-72    |
| ZFYVE19    | brown | 0.3109771    | 4.28E-11    | -0.393955016 | 2.04E-17    |
| NR2F1      | brown | -0.319096344 | 1.24E-11    | 0.545713498  | 9.75E-35    |
| PTGS2      | brown | -0.275803796 | 6.04E-09    | 0.290465894  | 8.33E-10    |
| OSBPL5     | brown | -0.236258431 | 7.22E-07    | 0.490283571  | 2.19E-27    |
| C8orf76    | brown | 0.327470863  | 3.31E-12    | -0.478229385 | 5.87E-26    |
| DDR1       | brown | 0.213241531  | 8.18E-06    | -0.48288265  | 1.67E-26    |
| CDH6       | brown | -0.106956095 | 0.026568608 | 0.408431069  | 1.02E-18    |
| PLIN1      | brown | -0.181483576 | 0.000154429 | 0.402117454  | 3.84E-18    |
| PDIA3      | brown | 0.371761448  | 1.53E-15    | -0.398471831 | 8.15E-18    |
| KLHL10     | brown | -0.381033762 | 2.63E-16    | 0.615981109  | 2.83E-46    |
| QRFP       | brown | -0.323699392 | 6.03E-12    | 0.371956865  | 1.48E-15    |
| MAPK4      | brown | -0.276200357 | 5.73E-09    | 0.405552801  | 1.87E-18    |
| VSTM2A     | brown | -0.464237393 | 2.27E-24    | 0.233872416  | 9.40E-07    |
| FGF10      | brown | -0.564362106 | 1.56E-37    | 0.786255924  | 1.60E-91    |
| RASD2      | brown | -0.13831145  | 0.004058719 | 0.379047877  | 3.85E-16    |
| TYK2       | brown | 0.304640439  | 1.10E-10    | -0.280051734 | 3.44E-09    |
| TMOD1      | brown | -0.49843159  | 2.20E-28    | 0.786887372  | 9.13E-92    |
| FXYD6      | brown | -0.416817303 | 1.68E-19    | 0.824905469  | 4.31E-108   |
| ANTXR2     | brown | -0.357195252 | 2.19E-14    | 0.706366986  | 3.23E-66    |
| PBX1       | brown | -0.257149813 | 6.37E-08    | 0.362426973  | 8.57E-15    |
| COL19A1    | brown | -0.460535468 | 5.82E-24    | 0.618275701  | 1.06E-46    |
| SORBS2     | brown | -0.483138964 | 1.56E-26    | 0.706117861  | 3.76E-66    |
| ENTPD6     | brown | 0.342602103  | 2.75E-13    | -0.414791599 | 2.61E-19    |
| CD01       | brown | -0.314556598 | 2.49E-11    | 0.559857792  | 7.67E-37    |
| PLCD4      | brown | -0.532793653 | 6.69E-33    | 0.778739262  | 1.07E-88    |
| FAT3       | brown | -0.215220225 | 6.71E-06    | 0.35912314   | 1.55E-14    |
| CDON       | brown | -0.344682536 | 1.93E-13    | 0.597307332  | 6.27E-43    |
| PRX        | brown | -0.285913675 | 1.56E-09    | 0.501713474  | 8.57E-29    |
| HSPA1L     | brown | -0.153573621 | 0.001401852 | 0.259684105  | 4.67E-08    |
| KCNE3      | brown | 0.052527068  | 0.277123318 | 0.139214086  | 0.003821904 |
| SCN2B      | brown | -0.408422979 | 1.02E-18    | 0.559156874  | 9.81E-37    |
| RNF112     | brown | -0.466810057 | 1.17E-24    | 0.668349039  | 5.69E-57    |
| AC011530.4 | brown | -0.478932482 | 4.86E-26    | 0.625682646  | 4.20E-48    |
| FAM46B     | brown | -0.355325051 | 3.05E-14    | 0.46942216   | 5.98E-25    |
| ANO4       | brown | -0.216869667 | 5.68E-06    | 0.273693168  | 7.95E-09    |
| CFL2       | brown | -0.449523852 | 8.90E-23    | 0.828108617  | 1.20E-109   |
| NRN1       | brown | -0.205200399 | 1.80E-05    | 0.345397875  | 1.71E-13    |
| NFASC      | brown | -0.464683185 | 2.03E-24    | 0.648181771  | 1.33E-52    |
| HGH1       | brown | 0.454107654  | 2.89E-23    | -0.515065033 | 1.66E-30    |
| GTPBP2     | brown | 0.311752302  | 3.81E-11    | -0.366185577 | 4.31E-15    |
| CRTAP      | brown | -0.31106048  | 4.23E-11    | 0.579683916  | 5.76E-40    |
| DDR2       | brown | -0.390549818 | 4.05E-17    | 0.844010252  | 7.16E-118   |
| ADAM8      | brown | 0.243948236  | 3.03E-07    | -0.250257248 | 1.45E-07    |
| FBXL22     | brown | -0.458055768 | 1.08E-23    | 0.797945025  | 3.77E-96    |
| KLF4       | brown | -0.38619554  | 9.60E-17    | 0.261508768  | 3.73E-08    |
| KIAA1614   | brown | -0.330864216 | 1.92E-12    | 0.67800695   | 3.46E-59    |
| KCNA5      | brown | -0.490135115 | 2.28E-27    | 0.69738137   | 6.70E-64    |
| MOCOS      | brown | 0.237217708  | 6.49E-07    | -0.366588275 | 4.01E-15    |
| CHMP1A     | brown | 0.210363017  | 1.09E-05    | -0.383702348 | 1.57E-16    |

|          |       |              |             |              |             |
|----------|-------|--------------|-------------|--------------|-------------|
| EPHA7    | brown | -0.429769211 | 9.34E-21    | 0.605664979  | 2.12E-44    |
| DCAF13   | brown | 0.259967218  | 4.52E-08    | -0.343215994 | 2.48E-13    |
| CAMKK1   | brown | -0.224310729 | 2.63E-06    | 0.240735887  | 4.37E-07    |
| C1QTNF4  | brown | -0.161776285 | 0.000759618 | 0.269916993  | 1.30E-08    |
| PROC     | brown | 0.128786275  | 0.007496607 | -0.179052915 | 0.000189726 |
| RRP9     | brown | 0.257183285  | 6.35E-08    | -0.434321193 | 3.28E-21    |
| RRAGD    | brown | -0.168489785 | 0.00045009  | 0.367538619  | 3.36E-15    |
| FABP5    | brown | 0.054206973  | 0.262027224 | -0.363480318 | 7.07E-15    |
| C8orf88  | brown | -0.312261519 | 3.53E-11    | 0.616758375  | 2.03E-46    |
| PCGF5    | brown | -0.19640915  | 4.11E-05    | 0.399185593  | 7.04E-18    |
| F11R     | brown | 0.270795157  | 1.16E-08    | -0.466903428 | 1.15E-24    |
| MYOZ2    | brown | -0.320311771 | 1.03E-11    | 0.597972175  | 4.81E-43    |
| EYA4     | brown | -0.26611542  | 2.10E-08    | 0.367263106  | 3.54E-15    |
| TYSND1   | brown | 0.268156418  | 1.62E-08    | -0.497772231 | 2.66E-28    |
| LPAR2    | brown | 0.336655072  | 7.44E-13    | -0.562649906 | 2.87E-37    |
| C1QTNF9  | brown | -0.49187422  | 1.40E-27    | 0.643480241  | 1.25E-51    |
| DDT      | brown | 0.150160327  | 0.001793532 | -0.328164664 | 2.97E-12    |
| ITIH5    | brown | -0.546572175 | 7.31E-35    | 0.787852908  | 3.87E-92    |
| LPHN2    | brown | -0.111348441 | 0.020919448 | 0.277641906  | 4.74E-09    |
| F2RL3    | brown | -0.003108858 | 0.948747958 | 0.278885687  | 4.02E-09    |
| MYOC     | brown | -0.641255272 | 3.54E-51    | 0.681589675  | 4.95E-60    |
| GPCPD1   | brown | -0.186433293 | 0.000100717 | 0.332403854  | 1.49E-12    |
| LRCH2    | brown | -0.375087278 | 8.20E-16    | 0.687112441  | 2.34E-61    |
| PDZD4    | brown | -0.408837252 | 9.36E-19    | 0.603339924  | 5.50E-44    |
| CD200    | brown | -0.276564431 | 5.46E-09    | 0.649305028  | 7.75E-53    |
| CADPS2   | brown | -0.046880705 | 0.33212498  | 0.242387373  | 3.62E-07    |
| CTDSPL   | brown | -0.141367259 | 0.003306703 | 0.170536343  | 0.000382203 |
| DNAJB5   | brown | -0.407317802 | 1.29E-18    | 0.750586418  | 4.92E-79    |
| USHBP1   | brown | -0.217362383 | 5.40E-06    | 0.497266725  | 3.07E-28    |
| DYNC1I1  | brown | -0.244222965 | 2.94E-07    | 0.476138295  | 1.02E-25    |
| RASSF7   | brown | 0.33590123   | 8.43E-13    | -0.594982282 | 1.58E-42    |
| CC2D1B   | brown | 0.312575117  | 3.36E-11    | -0.37368356  | 1.07E-15    |
| DDX56    | brown | 0.390265589  | 4.29E-17    | -0.569192195 | 2.75E-38    |
| MPC1     | brown | -0.200113404 | 2.92E-05    | 0.196020818  | 4.26E-05    |
| IQSEC1   | brown | -0.106658447 | 0.026994965 | 0.283511979  | 2.16E-09    |
| F10      | brown | -0.654439638 | 6.37E-54    | 0.738191918  | 3.52E-75    |
| C16orf74 | brown | 0.135986736  | 0.004730929 | -0.459738509 | 7.11E-24    |
| NTF4     | brown | 0.067344947  | 0.163313825 | -0.290280362 | 8.55E-10    |
| ITPR1    | brown | -0.413412551 | 3.51E-19    | 0.716968517  | 4.58E-69    |
| ABCB4    | brown | -0.273946009 | 7.70E-09    | 0.636765472  | 2.84E-50    |
| FAM83H   | brown | 0.358034141  | 1.89E-14    | -0.685435317 | 5.96E-61    |
| ATP2B4   | brown | -0.282081322 | 2.62E-09    | 0.519172279  | 4.76E-31    |
| MOCS2    | brown | -0.106024655 | 0.027922468 | 0.214764029  | 7.02E-06    |
| CDC37    | brown | 0.218336572  | 4.89E-06    | -0.393769109 | 2.12E-17    |
| FAM162B  | brown | -0.28609454  | 1.52E-09    | 0.305184968  | 1.01E-10    |
| DCLK1    | brown | -0.342463972 | 2.82E-13    | 0.648738066  | 1.02E-52    |
| EFNB1    | brown | 0.012047439  | 0.803281215 | -0.286076994 | 1.53E-09    |
| RNF135   | brown | 0.241850698  | 3.85E-07    | -0.240412483 | 4.54E-07    |
| INPP5B   | brown | -0.155166198 | 0.001247464 | 0.424147027  | 3.32E-20    |
| COASY    | brown | 0.42135724   | 6.18E-20    | -0.625021327 | 5.62E-48    |
| RPS6KA2  | brown | -0.356314785 | 2.56E-14    | 0.577970522  | 1.09E-39    |

|            |       |              |             |              |          |
|------------|-------|--------------|-------------|--------------|----------|
| DNALI1     | brown | -0.14402799  | 0.002757461 | 0.233397025  | 9.91E-07 |
| ASB1       | brown | -0.237626101 | 6.20E-07    | 0.421198116  | 6.40E-20 |
| POLR2H     | brown | 0.464740857  | 2.00E-24    | -0.662498109 | 1.14E-55 |
| RER1       | brown | 0.320136639  | 1.05E-11    | -0.454885621 | 2.39E-23 |
| MPZ        | brown | -0.414339491 | 2.87E-19    | 0.464638591  | 2.05E-24 |
| TP63       | brown | 0.118031238  | 0.014325767 | -0.366950161 | 3.75E-15 |
| TMEM41A    | brown | 0.314380141  | 2.56E-11    | -0.40764239  | 1.21E-18 |
| RBM24      | brown | -0.520058747 | 3.63E-31    | 0.724381559  | 3.90E-71 |
| GNAO1      | brown | -0.430963569 | 7.11E-21    | 0.744755144  | 3.41E-77 |
| USP2       | brown | -0.345474714 | 1.69E-13    | 0.33550736   | 8.99E-13 |
| TRIM7      | brown | 0.106135713  | 0.027757992 | -0.286042596 | 1.53E-09 |
| CACNA2D1   | brown | -0.300309148 | 2.06E-10    | 0.680123617  | 1.10E-59 |
| TEF        | brown | -0.286314942 | 1.48E-09    | 0.276921479  | 5.21E-09 |
| DESI1      | brown | 0.136771916  | 0.004493417 | -0.220721784 | 3.82E-06 |
| ITGA10     | brown | -0.118292625 | 0.014109983 | 0.416013187  | 2.00E-19 |
| OXLD1      | brown | 0.394707283  | 1.76E-17    | -0.555273967 | 3.78E-36 |
| TNS4       | brown | 0.079123673  | 0.101309691 | -0.3966042   | 1.19E-17 |
| PPIF       | brown | 0.21287652   | 8.48E-06    | -0.365077478 | 5.29E-15 |
| ARHGEF25   | brown | -0.34199173  | 3.05E-13    | 0.650884806  | 3.61E-53 |
| NEURL1     | brown | -0.228606465 | 1.67E-06    | 0.467761737  | 9.19E-25 |
| RPUSD3     | brown | 0.294388227  | 4.81E-10    | -0.358294739 | 1.80E-14 |
| EHP1L1     | brown | -0.204407895 | 1.94E-05    | 0.259191869  | 4.97E-08 |
| PCDH12     | brown | -0.031150545 | 0.5194279   | 0.446843464  | 1.70E-22 |
| PLSCR4     | brown | -0.312815815 | 3.24E-11    | 0.683313952  | 1.92E-60 |
| RGL1       | brown | -0.234352108 | 8.92E-07    | 0.607562749  | 9.71E-45 |
| RARB       | brown | -0.199238805 | 3.16E-05    | 0.468460851  | 7.67E-25 |
| IGSF10     | brown | -0.493861757 | 8.04E-28    | 0.526469358  | 4.96E-32 |
| PEMT       | brown | 0.212846564  | 8.51E-06    | -0.376148343 | 6.71E-16 |
| SNRPE      | brown | 0.326380245  | 3.94E-12    | -0.48528797  | 8.69E-27 |
| TBX18      | brown | -0.126298091 | 0.008745237 | 0.303554727  | 1.29E-10 |
| ELN        | brown | -0.298253924 | 2.77E-10    | 0.675679925  | 1.20E-58 |
| LEFTY2     | brown | -0.057263295 | 0.236036036 | 0.49658003   | 3.73E-28 |
| IGIP       | brown | -0.288863006 | 1.04E-09    | 0.526926378  | 4.30E-32 |
| OTUB1      | brown | 0.30332345   | 1.33E-10    | -0.5456362   | 1.00E-34 |
| DMRTA2     | brown | 0.137857164  | 0.004182856 | -0.200273512 | 2.87E-05 |
| EID1       | brown | -0.266913021 | 1.90E-08    | 0.505772404  | 2.63E-29 |
| FBLN5      | brown | -0.386212863 | 9.57E-17    | 0.737372779  | 6.21E-75 |
| IQCJ-SCHIP | brown | -0.257385983 | 6.19E-08    | 0.541486391  | 3.97E-34 |
| SGCG       | brown | -0.560114118 | 7.01E-37    | 0.602228695  | 8.65E-44 |
| RBP7       | brown | -0.240491753 | 4.50E-07    | 0.437014225  | 1.76E-21 |
| DBNDD2     | brown | -0.1849836   | 0.00011428  | 0.285009471  | 1.76E-09 |
| SEMA3A     | brown | -0.247223441 | 2.08E-07    | 0.556167087  | 2.78E-36 |
| PRSS22     | brown | 0.173658571  | 0.000296767 | -0.338191229 | 5.77E-13 |
| PCGF1      | brown | 0.417557348  | 1.43E-19    | -0.563547736 | 2.09E-37 |
| LAMTOR5    | brown | 0.261676669  | 3.66E-08    | -0.527512153 | 3.58E-32 |
| SEPP1      | brown | -0.247564477 | 1.99E-07    | 0.463084117  | 3.05E-24 |
| SLC8A2     | brown | -0.230412924 | 1.37E-06    | 0.364749333  | 5.61E-15 |
| HAPLN2     | brown | -0.131452452 | 0.006337733 | 0.263069251  | 3.08E-08 |
| KCTD10     | brown | -0.292294227 | 6.45E-10    | 0.639058222  | 9.86E-51 |
| IL11RA     | brown | -0.275370799 | 6.39E-09    | 0.478685456  | 5.19E-26 |
| TACC1      | brown | -0.258126275 | 5.66E-08    | 0.497919635  | 2.55E-28 |

|            |       |              |             |              |             |
|------------|-------|--------------|-------------|--------------|-------------|
| GUCA1C     | brown | -0.373235831 | 1.16E-15    | 0.162142697  | 0.000738603 |
| SDC3       | brown | -0.212009    | 9.25E-06    | 0.548379797  | 3.98E-35    |
| ATP1A2     | brown | -0.60900609  | 5.34E-45    | 0.838928967  | 3.81E-115   |
| NUDT7      | brown | -0.22776567  | 1.82E-06    | 0.320560058  | 9.87E-12    |
| RABEP1     | brown | -0.16434911  | 0.000623024 | 0.429052207  | 1.10E-20    |
| WFDC5      | brown | 0.032390926  | 0.50292589  | -0.201484009 | 2.56E-05    |
| LPAR1      | brown | -0.316770754 | 1.77E-11    | 0.413670671  | 3.32E-19    |
| PPIA       | brown | 0.351651475  | 5.82E-14    | -0.555503517 | 3.49E-36    |
| ALKBH4     | brown | 0.372775069  | 1.27E-15    | -0.44269024  | 4.61E-22    |
| BCL6B      | brown | -0.165842246 | 0.000554579 | 0.537101549  | 1.67E-33    |
| RBM38      | brown | -0.108404649 | 0.024575444 | 0.200795562  | 2.74E-05    |
| NDN        | brown | -0.239763425 | 4.88E-07    | 0.441939076  | 5.51E-22    |
| CARD14     | brown | 0.135936979  | 0.004746355 | -0.304133503 | 1.18E-10    |
| NFATC4     | brown | -0.300299709 | 2.07E-10    | 0.513447064  | 2.70E-30    |
| TNS2       | brown | -0.435283233 | 2.63E-21    | 0.794931029  | 6.28E-95    |
| PPIE       | brown | 0.182519931  | 0.000141339 | -0.273273399 | 8.40E-09    |
| SRF        | brown | -0.46876555  | 7.09E-25    | 0.563480606  | 2.14E-37    |
| NOP14      | brown | 0.083446912  | 0.083921804 | -0.26345249  | 2.93E-08    |
| FAM83A     | brown | 0.133305533  | 0.005629728 | -0.306884242 | 7.89E-11    |
| RNF126     | brown | 0.258246227  | 5.57E-08    | -0.560239603 | 6.71E-37    |
| ZC3H10     | brown | -0.020287862 | 0.674838591 | 0.211434669  | 9.79E-06    |
| ALDH1B1    | brown | -0.303291197 | 1.34E-10    | 0.650309546  | 4.77E-53    |
| XPNPEP2    | brown | -0.521172185 | 2.58E-31    | 0.756901544  | 4.36E-81    |
| ADCYAP1R1  | brown | -0.432937559 | 4.52E-21    | 0.69889857   | 2.76E-64    |
| HSPB2-C11o | brown | -0.35532829  | 3.05E-14    | 0.503345688  | 5.34E-29    |
| ECSCR      | brown | -0.271580071 | 1.05E-08    | 0.549473079  | 2.75E-35    |
| NSFL1C     | brown | 0.200390724  | 2.84E-05    | -0.374601005 | 8.99E-16    |
| STC1       | brown | -0.200251761 | 2.88E-05    | 0.416926421  | 1.64E-19    |
| PPM1L      | brown | -0.332138288 | 1.56E-12    | 0.444506904  | 2.99E-22    |
| MTHFR      | brown | -0.207550722 | 1.43E-05    | 0.298590257  | 2.64E-10    |
| LDLRAD2    | brown | -0.45850467  | 9.69E-24    | 0.802585878  | 4.50E-98    |
| SMPX       | brown | -0.294477267 | 4.75E-10    | 0.522897948  | 1.51E-31    |
| 3-Mar      | brown | -0.056400159 | 0.243184787 | 0.211370888  | 9.85E-06    |
| TMEM99     | brown | 0.227995729  | 1.78E-06    | -0.390874558 | 3.80E-17    |
| PAK4       | brown | 0.280574862  | 3.21E-09    | -0.445467898 | 2.37E-22    |
| MTURN      | brown | -0.379035047 | 3.86E-16    | 0.479810162  | 3.84E-26    |
| XPA        | brown | -0.229011586 | 1.59E-06    | 0.259542967  | 4.76E-08    |
| MYO1C      | brown | -0.13578095  | 0.004795023 | 0.266705891  | 1.95E-08    |
| ATAD3B     | brown | 0.296259849  | 3.69E-10    | -0.488274053 | 3.82E-27    |
| GAB2       | brown | -0.18169255  | 0.000151702 | 0.439151032  | 1.06E-21    |
| ZHX2       | brown | -0.234292057 | 8.98E-07    | 0.428183978  | 1.34E-20    |
| PRDM11     | brown | -0.238886287 | 5.39E-07    | 0.325873825  | 4.27E-12    |
| CCDC136    | brown | -0.337566429 | 6.40E-13    | 0.535256607  | 3.03E-33    |
| MYL12B     | brown | 0.280075955  | 3.43E-09    | -0.44949848  | 8.96E-23    |
| LMCD1      | brown | -0.276208286 | 5.73E-09    | 0.685601266  | 5.43E-61    |
| USF1       | brown | 0.260989781  | 3.98E-08    | -0.310890203 | 4.34E-11    |
| ZNF540     | brown | -0.273915745 | 7.73E-09    | 0.42215591   | 5.18E-20    |
| TMEM259    | brown | 0.279395665  | 3.76E-09    | -0.457057782 | 1.39E-23    |
| CDK15      | brown | -0.35822232  | 1.83E-14    | 0.687959072  | 1.46E-61    |
| THRA       | brown | -0.335812937 | 8.55E-13    | 0.588826923  | 1.76E-41    |
| ANKRD22    | brown | 0.077181518  | 0.109999368 | -0.227269059 | 1.92E-06    |

|           |       |              |             |              |             |
|-----------|-------|--------------|-------------|--------------|-------------|
| ACTA1     | brown | -0.223897138 | 2.75E-06    | 0.376554367  | 6.21E-16    |
| YWHAЕ     | brown | 0.225650898  | 2.28E-06    | -0.367280192 | 3.53E-15    |
| C18orf21  | brown | 0.270651073  | 1.18E-08    | -0.431802412 | 5.86E-21    |
| FLAD1     | brown | 0.402690937  | 3.41E-18    | -0.532751896 | 6.78E-33    |
| CACNA1H   | brown | -0.448427841 | 1.16E-22    | 0.765451676  | 5.73E-84    |
| HEPH      | brown | -0.291452222 | 7.26E-10    | 0.714358169  | 2.37E-68    |
| ARRDC1    | brown | 0.279473767  | 3.72E-09    | -0.478641692 | 5.25E-26    |
| CCDC89    | brown | -0.083068334 | 0.085341206 | 0.208591795  | 1.30E-05    |
| SH3BGR    | brown | -0.417320121 | 1.50E-19    | 0.636331699  | 3.47E-50    |
| NTNG1     | brown | -0.297062052 | 3.29E-10    | 0.537223329  | 1.60E-33    |
| PCDHGB7   | brown | -0.298046063 | 2.86E-10    | 0.60091287   | 1.47E-43    |
| SPNS2     | brown | -0.023320505 | 0.629633893 | 0.185914723  | 0.000105385 |
| NME1-NME2 | brown | 0.232087485  | 1.14E-06    | -0.478613926 | 5.29E-26    |
| NFIX      | brown | -0.360347739 | 1.25E-14    | 0.646930441  | 2.42E-52    |
| CHRDЛ2    | brown | -0.152616556 | 0.001502886 | 0.61167674   | 1.75E-45    |
| ADCY4     | brown | -0.237737442 | 6.13E-07    | 0.592214197  | 4.70E-42    |
| MRGPRF    | brown | -0.429400091 | 1.02E-20    | 0.730909152  | 5.13E-73    |
| DACT3     | brown | -0.432498398 | 5.00E-21    | 0.831940046  | 1.51E-111   |
| GID8      | brown | 0.283232194  | 2.25E-09    | -0.428876399 | 1.14E-20    |
| JUP       | brown | 0.252685054  | 1.09E-07    | -0.573634003 | 5.45E-39    |
| CKM       | brown | -0.194212393 | 5.03E-05    | 0.221991218  | 3.35E-06    |
| VAMP8     | brown | 0.317281477  | 1.64E-11    | -0.530249774 | 1.51E-32    |
| KCNJ3     | brown | -0.335875592 | 8.46E-13    | 0.474905023  | 1.42E-25    |
| ALAS2     | brown | -0.07746036  | 0.108716847 | 0.196380105  | 4.12E-05    |
| TBC1D19   | brown | -0.109390315 | 0.023294204 | 0.379791617  | 3.34E-16    |
| SLC2A4    | brown | -0.578329983 | 9.56E-40    | 0.848281809  | 3.07E-120   |
| ATP13A1   | brown | 0.39069492   | 3.94E-17    | -0.492942244 | 1.04E-27    |
| RPP25     | brown | 0.150738489  | 0.001720826 | -0.248797129 | 1.73E-07    |
| TMEM216   | brown | 0.236020616  | 7.42E-07    | -0.352024516 | 5.45E-14    |
| PAFAH1B3  | brown | 0.411162068  | 5.70E-19    | -0.597100394 | 6.81E-43    |
| DRG2      | brown | 0.157439511  | 0.001054066 | -0.22784765  | 1.81E-06    |
| PLXNA4    | brown | -0.171741894 | 0.00034681  | 0.518808532  | 5.32E-31    |
| C8orf59   | brown | 0.251280236  | 1.29E-07    | -0.439991107 | 8.73E-22    |
| FNBP1     | brown | -0.402751858 | 3.36E-18    | 0.779974047  | 3.73E-89    |
| FABP3     | brown | -0.076544297 | 0.112974958 | 0.163961252  | 0.000642042 |
| MAMDC2    | brown | -0.462023104 | 3.99E-24    | 0.653604809  | 9.60E-54    |
| GFRA1     | brown | -0.517940682 | 6.93E-31    | 0.611991508  | 1.53E-45    |
| STX18     | brown | 0.237499169  | 6.29E-07    | -0.250950414 | 1.34E-07    |
| ZNF354C   | brown | -0.112370536 | 0.019765561 | 0.338472247  | 5.50E-13    |
| NAP1L2    | brown | -0.364944961 | 5.42E-15    | 0.435281287  | 2.63E-21    |
| CSTF1     | brown | 0.260056308  | 4.47E-08    | -0.336557738 | 7.56E-13    |
| ABI3BP    | brown | -0.50433111  | 4.01E-29    | 0.842148794  | 7.32E-117   |
| NAPRT     | brown | 0.148095819  | 0.002076714 | -0.377095708 | 5.60E-16    |
| MBNL1     | brown | -0.283759937 | 2.09E-09    | 0.607158556  | 1.15E-44    |
| MECR      | brown | 0.278208905  | 4.40E-09    | -0.325360723 | 4.64E-12    |
| PTCH2     | brown | -0.316790576 | 1.77E-11    | 0.601041688  | 1.40E-43    |
| TMEM44    | brown | 0.29305527   | 5.80E-10    | -0.29761652  | 3.04E-10    |
| DCUN1D3   | brown | -0.40029404  | 5.60E-18    | 0.499717985  | 1.52E-28    |
| NBEA      | brown | -0.408358882 | 1.04E-18    | 0.618717585  | 8.76E-47    |
| FAIM2     | brown | -0.553104992 | 7.98E-36    | 0.727850142  | 3.97E-72    |
| CRABP2    | brown | 0.076129994  | 0.114943266 | -0.24699602  | 2.13E-07    |

|          |       |              |             |              |           |
|----------|-------|--------------|-------------|--------------|-----------|
| BMP5     | brown | -0.422382238 | 4.92E-20    | 0.325199667  | 4.76E-12  |
| C1QTNF2  | brown | -0.414380608 | 2.85E-19    | 0.66331204   | 7.55E-56  |
| RASSF3   | brown | -0.331630841 | 1.69E-12    | 0.675969176  | 1.03E-58  |
| PGAP2    | brown | 0.245942012  | 2.41E-07    | -0.508214228 | 1.28E-29  |
| TMEM234  | brown | 0.30712072   | 7.62E-11    | -0.392337067 | 2.83E-17  |
| MAGEE1   | brown | -0.102577895 | 0.033459896 | 0.226525218  | 2.08E-06  |
| MFSD5    | brown | 0.244555489  | 2.83E-07    | -0.490899535 | 1.84E-27  |
| DLG2     | brown | -0.481008097 | 2.78E-26    | 0.563491402  | 2.13E-37  |
| HIPK4    | brown | -0.358992349 | 1.59E-14    | 0.560916863  | 5.29E-37  |
| SHISA3   | brown | -0.379527626 | 3.51E-16    | 0.5141409    | 2.19E-30  |
| LPP      | brown | -0.399756587 | 6.26E-18    | 0.753152762  | 7.33E-80  |
| NT5DC3   | brown | -0.329629756 | 2.34E-12    | 0.675815778  | 1.12E-58  |
| LY6K     | brown | 0.156996797  | 0.001089411 | -0.273141233 | 8.55E-09  |
| FARSA    | brown | 0.285998357  | 1.54E-09    | -0.486463846 | 6.29E-27  |
| FOXO1    | brown | -0.225321107 | 2.36E-06    | 0.41345384   | 3.48E-19  |
| CRTC2    | brown | 0.301886931  | 1.64E-10    | -0.359704489 | 1.40E-14  |
| ATL1     | brown | -0.265602435 | 2.24E-08    | 0.482053038  | 2.10E-26  |
| RPUSD2   | brown | 0.296333266  | 3.65E-10    | -0.468142337 | 8.33E-25  |
| GCSAML   | brown | -0.37968455  | 3.41E-16    | 0.647773093  | 1.62E-52  |
| SPARCL1  | brown | -0.436117709 | 2.16E-21    | 0.826097324  | 1.15E-108 |
| NUDT8    | brown | 0.26934949   | 1.39E-08    | -0.538793805 | 9.60E-34  |
| GKAP1    | brown | -0.18100466  | 0.000160855 | 0.334903429  | 9.93E-13  |
| SERINC2  | brown | 0.295824261  | 3.92E-10    | -0.581403226 | 3.01E-40  |
| TMEM63B  | brown | 0.202923219  | 2.24E-05    | -0.426724691 | 1.86E-20  |
| PEAR1    | brown | -0.157998452 | 0.001010953 | 0.407689958  | 1.19E-18  |
| SLC2A13  | brown | -0.195016626 | 4.67E-05    | 0.520733444  | 2.95E-31  |
| HECTD3   | brown | 0.262693173  | 3.22E-08    | -0.264089608 | 2.71E-08  |
| LPPR4    | brown | -0.448240817 | 1.22E-22    | 0.45188304   | 5.00E-23  |
| RABGGTA  | brown | 0.212220262  | 9.06E-06    | -0.441440895 | 6.20E-22  |
| POP5     | brown | 0.279871998  | 3.52E-09    | -0.453176672 | 3.64E-23  |
| FAM135B  | brown | -0.430128    | 8.60E-21    | 0.268468841  | 1.56E-08  |
| GMDS     | brown | 0.215981247  | 6.21E-06    | -0.321549337 | 8.45E-12  |
| TPM1     | brown | -0.382183556 | 2.10E-16    | 0.743535866  | 8.16E-77  |
| PRKD1    | brown | -0.198657903 | 3.34E-05    | 0.585624395  | 6.05E-41  |
| HDGFRP3  | brown | -0.152398102 | 0.001526865 | 0.261755115  | 3.62E-08  |
| ACSM5    | brown | -0.291259801 | 7.46E-10    | 0.632433607  | 2.05E-49  |
| NOVA2    | brown | -0.041385213 | 0.391969688 | 0.386203127  | 9.59E-17  |
| LRRC70   | brown | -0.306236304 | 8.68E-11    | 0.618952216  | 7.91E-47  |
| GPR17    | brown | -0.336623646 | 7.48E-13    | 0.691208575  | 2.33E-62  |
| BTNL9    | brown | -0.12693929  | 0.008406907 | 0.211954704  | 9.30E-06  |
| JAM2     | brown | -0.510790219 | 5.98E-30    | 0.851888367  | 2.70E-122 |
| HSPB7    | brown | -0.384518555 | 1.33E-16    | 0.784405692  | 8.11E-91  |
| PARK2    | brown | -0.516878927 | 9.58E-31    | 0.674302435  | 2.50E-58  |
| NOC4L    | brown | 0.295863243  | 3.90E-10    | -0.489793706 | 2.51E-27  |
| FBXO32   | brown | -0.213356988 | 8.09E-06    | 0.614106543  | 6.27E-46  |
| DDO      | brown | -0.111647602 | 0.020575805 | 0.219599835  | 4.29E-06  |
| ZNF205   | brown | 0.305169603  | 1.02E-10    | -0.445053247 | 2.62E-22  |
| WBSCR22  | brown | 0.267245976  | 1.82E-08    | -0.517542859 | 7.83E-31  |
| CRYM     | brown | -0.364169427 | 6.24E-15    | 0.518054593  | 6.70E-31  |
| KIAA1210 | brown | -0.20989671  | 1.14E-05    | 0.281779624  | 2.73E-09  |
| SCAMP2   | brown | 0.209672263  | 1.17E-05    | -0.294630332 | 4.65E-10  |

|           |       |              |             |              |          |
|-----------|-------|--------------|-------------|--------------|----------|
| RERG      | brown | -0.396273659 | 1.28E-17    | 0.712148008  | 9.39E-68 |
| NEXN      | brown | -0.406821743 | 1.43E-18    | 0.798703526  | 1.84E-96 |
| CCNJL     | brown | 0.082289898  | 0.088320558 | -0.18846549  | 8.42E-05 |
| ICAM2     | brown | -0.180639331 | 0.000165925 | 0.31859143   | 1.34E-11 |
| NOP10     | brown | 0.29051703   | 8.27E-10    | -0.473513892 | 2.05E-25 |
| SETBP1    | brown | -0.318213564 | 1.42E-11    | 0.629314691  | 8.35E-49 |
| EBF3      | brown | -0.302909743 | 1.41E-10    | 0.636179666  | 3.72E-50 |
| DBX2      | brown | -0.151563176 | 0.001621785 | 0.261770711  | 3.61E-08 |
| LINC00493 | brown | 0.171066895  | 0.000366232 | -0.349071714 | 9.11E-14 |
| SMTNL2    | brown | -0.2084399   | 1.31E-05    | 0.386307455  | 9.39E-17 |
| ARMC6     | brown | 0.325156816  | 4.79E-12    | -0.425584583 | 2.41E-20 |
| CACNB2    | brown | -0.420407824 | 7.63E-20    | 0.787614711  | 4.79E-92 |
| TRIM11    | brown | 0.331420033  | 1.75E-12    | -0.498405507 | 2.22E-28 |
| GIT1      | brown | 0.314086509  | 2.67E-11    | -0.414316025 | 2.89E-19 |
| LYPD3     | brown | 0.061468372  | 0.203327579 | -0.319071017 | 1.24E-11 |
| TRMU      | brown | 0.356236249  | 2.60E-14    | -0.502917007 | 6.05E-29 |
| COL21A1   | brown | -0.358784119 | 1.65E-14    | 0.615817195  | 3.03E-46 |
| CLEC14A   | brown | -0.207188865 | 1.48E-05    | 0.501334688  | 9.55E-29 |
| HPS6      | brown | 0.176662888  | 0.00023169  | -0.330678359 | 1.98E-12 |
| HSD17B10  | brown | 0.213314498  | 8.12E-06    | -0.461982231 | 4.03E-24 |
| ELTD1     | brown | -0.229156754 | 1.57E-06    | 0.617553531  | 1.44E-46 |
| PRKAR2B   | brown | -0.337620178 | 6.34E-13    | 0.543635029  | 1.95E-34 |
| CABP1     | brown | -0.239494907 | 5.03E-07    | 0.313570711  | 2.89E-11 |
| RNF7      | brown | 0.279030336  | 3.94E-09    | -0.423509153 | 3.83E-20 |
| GARNL3    | brown | -0.342631046 | 2.74E-13    | 0.377389991  | 5.29E-16 |
| RARA      | brown | -0.15539289  | 0.001226807 | 0.261763598  | 3.62E-08 |
| CYP2U1    | brown | -0.225513876 | 2.32E-06    | 0.547945894  | 4.61E-35 |
| TNNT2     | brown | -0.300431438 | 2.03E-10    | 0.462699183  | 3.36E-24 |
| LRRTM1    | brown | -0.37897819  | 3.91E-16    | 0.385597928  | 1.08E-16 |
| FAM124A   | brown | -0.311112784 | 4.20E-11    | 0.704331858  | 1.10E-65 |
| EHD4      | brown | 0.04506747   | 0.351185437 | -0.196129802 | 4.22E-05 |
| TNFAIP8L3 | brown | -0.38586932  | 1.02E-16    | 0.703303473  | 2.04E-65 |
| RRP7A     | brown | 0.242806707  | 3.46E-07    | -0.399103586 | 7.16E-18 |
| EIF6      | brown | 0.281528415  | 2.82E-09    | -0.60520717  | 2.56E-44 |
| PYCRL     | brown | 0.34991471   | 7.87E-14    | -0.466949253 | 1.13E-24 |
| DPH7      | brown | 0.260827474  | 4.06E-08    | -0.392203215 | 2.91E-17 |
| TSTA3     | brown | 0.350244414  | 7.44E-14    | -0.520736004 | 2.95E-31 |
| DEDD2     | brown | 0.252525714  | 1.11E-07    | -0.452587247 | 4.21E-23 |
| ITGB1BP2  | brown | -0.405385348 | 1.94E-18    | 0.6416356    | 2.96E-51 |
| ZDHHC8    | brown | 0.20937603   | 1.20E-05    | -0.231744272 | 1.19E-06 |
| FOXN3     | brown | -0.345667265 | 1.64E-13    | 0.621911955  | 2.19E-47 |
| ORMDL2    | brown | 0.28480725   | 1.81E-09    | -0.519888738 | 3.82E-31 |
| NUDT22    | brown | 0.251928787  | 1.19E-07    | -0.450359081 | 7.26E-23 |
| ZNF707    | brown | 0.320699907  | 9.65E-12    | -0.325057324 | 4.87E-12 |
| PFDN2     | brown | 0.287208488  | 1.31E-09    | -0.402863252 | 3.29E-18 |
| NUDT10    | brown | -0.25672475  | 6.71E-08    | 0.539379436  | 7.93E-34 |
| PTRH2     | brown | 0.299964091  | 2.17E-10    | -0.483821096 | 1.30E-26 |
| TMED3     | brown | 0.282519819  | 2.47E-09    | -0.418627893 | 1.13E-19 |
| RFX2      | brown | -0.291830116 | 6.89E-10    | 0.231059894  | 1.28E-06 |
| SLC50A1   | brown | 0.341319265  | 3.42E-13    | -0.416254485 | 1.90E-19 |
| TDRD10    | brown | -0.245039073 | 2.67E-07    | 0.498291761  | 2.29E-28 |



|          |       |              |             |              |           |
|----------|-------|--------------|-------------|--------------|-----------|
| CCDC110  | brown | -0.292269294 | 6.48E-10    | 0.550418089  | 2.00E-35  |
| RSP02    | brown | -0.251513647 | 1.25E-07    | 0.652330297  | 1.79E-53  |
| FBXL19   | brown | 0.297625244  | 3.03E-10    | -0.500935574 | 1.07E-28  |
| CA3      | brown | -0.232248751 | 1.12E-06    | 0.542287797  | 3.04E-34  |
| RGS9BP   | brown | -0.082383686 | 0.087957233 | 0.210794861  | 1.04E-05  |
| HOXA11   | brown | -0.078542786 | 0.103849631 | 0.194525855  | 4.89E-05  |
| PRRG3    | brown | -0.47320477  | 2.22E-25    | 0.718829407  | 1.41E-69  |
| ZHX3     | brown | -0.338060577 | 5.89E-13    | 0.604190711  | 3.89E-44  |
| SLC35A2  | brown | 0.368870854  | 2.63E-15    | -0.415802667 | 2.09E-19  |
| CBX6     | brown | -0.223360827 | 2.90E-06    | 0.429220312  | 1.06E-20  |
| GAR1     | brown | 0.227783955  | 1.82E-06    | -0.440048063 | 8.62E-22  |
| PSMG2    | brown | 0.178234956  | 0.000203213 | -0.281159445 | 2.97E-09  |
| MAP3K8   | brown | -0.252899856 | 1.06E-07    | 0.193958321  | 5.15E-05  |
| CDH5     | brown | -0.188306893 | 8.54E-05    | 0.594770003  | 1.72E-42  |
| GID4     | brown | -0.178586844 | 0.000197305 | 0.320794736  | 9.51E-12  |
| SH3D19   | brown | -0.307615873 | 7.08E-11    | 0.532280526  | 7.88E-33  |
| APBB1    | brown | -0.334605127 | 1.04E-12    | 0.649073645  | 8.67E-53  |
| RIC3     | brown | -0.297709706 | 3.00E-10    | 0.339903984  | 4.33E-13  |
| CREBRF   | brown | -0.29424958  | 4.90E-10    | 0.5953227    | 1.38E-42  |
| ST14     | brown | 0.312326306  | 3.49E-11    | -0.513986895 | 2.30E-30  |
| IL17B    | brown | -0.294350597 | 4.83E-10    | 0.633858191  | 1.07E-49  |
| CIQTNF7  | brown | -0.656092969 | 2.82E-54    | 0.777178221  | 3.98E-88  |
| REEP4    | brown | 0.29398328   | 5.09E-10    | -0.602149577 | 8.93E-44  |
| MYH2     | brown | -0.376080295 | 6.79E-16    | 0.445234766  | 2.51E-22  |
| PHKG2    | brown | 0.282499233  | 2.48E-09    | -0.446046073 | 2.07E-22  |
| MYL9     | brown | -0.37920662  | 3.74E-16    | 0.71494276   | 1.64E-68  |
| TES      | brown | -0.230877454 | 1.30E-06    | 0.384187264  | 1.42E-16  |
| RSP01    | brown | -0.37070165  | 1.87E-15    | 0.527091492  | 4.08E-32  |
| ADCK5    | brown | 0.310011162  | 4.95E-11    | -0.525376469 | 6.99E-32  |
| TCF21    | brown | -0.628925759 | 9.94E-49    | 0.735386054  | 2.45E-74  |
| LRRK2    | brown | -0.449107531 | 9.85E-23    | 0.784420252  | 8.00E-91  |
| CLDN11   | brown | -0.17104033  | 0.000367016 | 0.361133978  | 1.08E-14  |
| NR2C2AP  | brown | 0.35346783   | 4.24E-14    | -0.548094387 | 4.38E-35  |
| UBE2Q2   | brown | -0.194444683 | 4.92E-05    | 0.412732344  | 4.07E-19  |
| SYNC     | brown | -0.340128765 | 4.17E-13    | 0.759180476  | 7.64E-82  |
| WNT2B    | brown | -0.382484582 | 1.98E-16    | 0.440996847  | 6.89E-22  |
| SLC16A13 | brown | 0.276589858  | 5.44E-09    | -0.293488275 | 5.46E-10  |
| SLC25A39 | brown | 0.416642679  | 1.74E-19    | -0.645863534 | 4.03E-52  |
| CYTL1    | brown | -0.344436562 | 2.02E-13    | 0.530132173  | 1.56E-32  |
| GJB7     | brown | 0.211627697  | 9.61E-06    | -0.257426907 | 6.16E-08  |
| IGF1     | brown | -0.185998726 | 0.000104615 | 0.595333397  | 1.38E-42  |
| SMAGP    | brown | 0.156979009  | 0.001090854 | -0.310782621 | 4.41E-11  |
| SLC16A4  | brown | -0.243245627 | 3.29E-07    | 0.373837517  | 1.04E-15  |
| HDAC4    | brown | -0.413054612 | 3.79E-19    | 0.688622359  | 1.01E-61  |
| ASPA     | brown | -0.588456861 | 2.03E-41    | 0.566901352  | 6.29E-38  |
| BCHE     | brown | -0.408702734 | 9.63E-19    | 0.627762667  | 1.67E-48  |
| CLDN7    | brown | 0.208836844  | 1.26E-05    | -0.468419095 | 7.75E-25  |
| LDLRAD4  | brown | -0.240035685 | 4.73E-07    | 0.545176101  | 1.17E-34  |
| PRDM8    | brown | -0.299536401 | 2.31E-10    | 0.518387224  | 6.05E-31  |
| KCNMB1   | brown | -0.475998752 | 1.06E-25    | 0.826354295  | 8.62E-109 |
| TSEN34   | brown | 0.231295433  | 1.25E-06    | -0.375906407 | 7.02E-16  |

|          |       |              |             |              |             |
|----------|-------|--------------|-------------|--------------|-------------|
| CBX7     | brown | -0.489412699 | 2.79E-27    | 0.626598554  | 2.80E-48    |
| NT5C1A   | brown | -0.153557016 | 0.00140355  | 0.384916587  | 1.23E-16    |
| SH3BP2   | brown | 0.304845374  | 1.07E-10    | -0.309261595 | 5.54E-11    |
| PELI3    | brown | -0.068394043 | 0.156840232 | 0.111153719  | 0.021145791 |
| EXOSC1   | brown | 0.227106856  | 1.96E-06    | -0.351000612 | 6.52E-14    |
| SIRT7    | brown | 0.346782144  | 1.35E-13    | -0.56263407  | 2.88E-37    |
| TSHZ3    | brown | -0.325868199 | 4.28E-12    | 0.715624535  | 1.07E-68    |
| SKIV2L   | brown | 0.257036553  | 6.46E-08    | -0.345683157 | 1.63E-13    |
| EPHB1    | brown | -0.272886885 | 8.83E-09    | 0.475034673  | 1.37E-25    |
| TMEM88   | brown | -0.308261998 | 6.43E-11    | 0.366188773  | 4.31E-15    |
| FRZB     | brown | -0.131350543 | 0.006378891 | 0.457227233  | 1.33E-23    |
| SLC25A4  | brown | -0.321646606 | 8.33E-12    | 0.37686706   | 5.85E-16    |
| TAF6L    | brown | 0.305704116  | 9.39E-11    | -0.45427332  | 2.78E-23    |
| ALG8     | brown | 0.311152126  | 4.17E-11    | -0.381821755 | 2.26E-16    |
| SYPL2    | brown | -0.351447837 | 6.03E-14    | 0.679512157  | 1.53E-59    |
| PLXND1   | brown | -0.012520891 | 0.795717731 | 0.398074694  | 8.84E-18    |
| NEK9     | brown | -0.187369306 | 9.28E-05    | 0.490786527  | 1.90E-27    |
| EGR3     | brown | -0.528001274 | 3.07E-32    | 0.625483489  | 4.58E-48    |
| ADAMTS9  | brown | -0.268210849 | 1.61E-08    | 0.682384998  | 3.20E-60    |
| ACTC1    | brown | -0.421650658 | 5.79E-20    | 0.763542969  | 2.58E-83    |
| HSBP1L1  | brown | 0.271870102  | 1.01E-08    | -0.428767977 | 1.17E-20    |
| C8orf89  | brown | -0.091842079 | 0.057046059 | 0.252061109  | 1.17E-07    |
| DCHS1    | brown | -0.343639615 | 2.31E-13    | 0.840040384  | 9.83E-116   |
| GPS1     | brown | 0.3492477    | 8.84E-14    | -0.46328253  | 2.90E-24    |
| FAM212B  | brown | -0.303243871 | 1.35E-10    | 0.314299669  | 2.59E-11    |
| HSPA2    | brown | -0.317590469 | 1.56E-11    | 0.44963354   | 8.67E-23    |
| PPP1R3F  | brown | -0.094515308 | 0.050160531 | 0.175157701  | 0.000262415 |
| CCDC64   | brown | 0.175832646  | 0.000248194 | -0.267545664 | 1.75E-08    |
| NPR2     | brown | -0.35017654  | 7.53E-14    | 0.636454166  | 3.28E-50    |
| ADPGK    | brown | 0.399043155  | 7.25E-18    | -0.305375088 | 9.86E-11    |
| TPPP     | brown | -0.556502108 | 2.47E-36    | 0.528270128  | 2.82E-32    |
| C15orf59 | brown | -0.30667426  | 8.14E-11    | 0.356087687  | 2.67E-14    |
| MXRA7    | brown | -0.363135652 | 7.53E-15    | 0.694432573  | 3.69E-63    |
| MATN2    | brown | -0.367430035 | 3.43E-15    | 0.482739169  | 1.74E-26    |
| NDUFA12  | brown | 0.170374837  | 0.000387193 | -0.324472666 | 5.34E-12    |
| PITPNM2  | brown | -0.229238564 | 1.56E-06    | 0.413785219  | 3.24E-19    |
| TRPC3    | brown | -0.419488026 | 9.34E-20    | 0.601015597  | 1.41E-43    |
| TRPC4AP  | brown | 0.286003969  | 1.54E-09    | -0.324241053 | 5.54E-12    |
| MORN5    | brown | -0.508956437 | 1.03E-29    | 0.71681791   | 5.04E-69    |
| DCAF12L1 | brown | -0.296801716 | 3.41E-10    | 0.365783356  | 4.65E-15    |
| PDE3A    | brown | -0.220462986 | 3.93E-06    | 0.660033396  | 3.96E-55    |
| TMEM69   | brown | 0.35818278   | 1.84E-14    | -0.520973139 | 2.74E-31    |
| GATA6    | brown | -0.454764614 | 2.46E-23    | 0.758816574  | 1.01E-81    |
| SNRPD3   | brown | 0.28813598   | 1.15E-09    | -0.448565806 | 1.12E-22    |
| HSPB8    | brown | -0.349657689 | 8.23E-14    | 0.523090367  | 1.42E-31    |
| DTNB     | brown | 0.171971319  | 0.00034043  | -0.239242564 | 5.18E-07    |
| YIPF2    | brown | 0.312251313  | 3.53E-11    | -0.314180027 | 2.64E-11    |
| PPP1R14A | brown | -0.389640127 | 4.86E-17    | 0.638228343  | 1.45E-50    |
| CX3CL1   | brown | -0.254917917 | 8.35E-08    | 0.369624335  | 2.29E-15    |
| ANKRD35  | brown | -0.219843322 | 4.19E-06    | 0.298631607  | 2.63E-10    |
| CD164L2  | brown | 0.128098132  | 0.007824924 | -0.205975408 | 1.67E-05    |

|            |       |              |             |              |             |
|------------|-------|--------------|-------------|--------------|-------------|
| COL14A1    | brown | -0.43867554  | 1.19E-21    | 0.795735952  | 2.98E-95    |
| DDRGK1     | brown | 0.221856178  | 3.40E-06    | -0.369384932 | 2.39E-15    |
| CD302      | brown | -0.324367474 | 5.43E-12    | 0.653109989  | 1.22E-53    |
| RAB30      | brown | -0.275961817 | 5.91E-09    | 0.637466954  | 2.06E-50    |
| PUS1       | brown | 0.331534257  | 1.72E-12    | -0.568025358 | 4.20E-38    |
| SMIM10     | brown | -0.295938665 | 3.86E-10    | 0.553470655  | 7.04E-36    |
| DST        | brown | -0.155904384 | 0.001181349 | 0.295780536  | 3.95E-10    |
| ANGPT2     | brown | 0.068938735  | 0.153556527 | 0.062645247  | 0.194792301 |
| ACTG1      | brown | 0.149613411  | 0.001864888 | -0.325477332 | 4.55E-12    |
| FAM171A1   | brown | -0.169847507 | 0.000403909 | 0.452563126  | 4.23E-23    |
| COA6       | brown | 0.357559098  | 2.05E-14    | -0.472085356 | 2.98E-25    |
| DGKZ       | brown | 0.220515063  | 3.91E-06    | -0.234477352 | 8.80E-07    |
| JPH2       | brown | -0.367439004 | 3.43E-15    | 0.705932879  | 4.20E-66    |
| ARID5B     | brown | -0.312301632 | 3.51E-11    | 0.587922467  | 2.50E-41    |
| NEURL1B    | brown | -0.226920522 | 1.99E-06    | 0.525179589  | 7.43E-32    |
| PPP1CA     | brown | 0.368980694  | 2.58E-15    | -0.613944467 | 6.72E-46    |
| INO80B     | brown | 0.244603131  | 2.81E-07    | -0.439189276 | 1.05E-21    |
| MRVI1      | brown | -0.425930704 | 2.23E-20    | 0.83484811   | 5.03E-113   |
| TRIM61     | brown | -0.138424988 | 0.004028218 | 0.227621396  | 1.85E-06    |
| NFIB       | brown | -0.274591803 | 7.08E-09    | 0.514858929  | 1.77E-30    |
| ACACB      | brown | -0.49797782  | 2.50E-28    | 0.720896003  | 3.74E-70    |
| CTAGE8     | brown | 0.130333832  | 0.006802821 | -0.227832336 | 1.81E-06    |
| CTSG       | brown | -0.394215031 | 1.94E-17    | 0.757758259  | 2.27E-81    |
| DES        | brown | -0.361363284 | 1.04E-14    | 0.670368824  | 1.99E-57    |
| FAM117A    | brown | -0.224199005 | 2.66E-06    | 0.368910682  | 2.61E-15    |
| BMP4       | brown | -0.153037019 | 0.001457703 | 0.322939713  | 6.80E-12    |
| MRPS28     | brown | 0.152812082  | 0.001481717 | -0.312755718 | 3.27E-11    |
| IGSF8      | brown | 0.283240734  | 2.24E-09    | -0.409889481 | 7.48E-19    |
| ACTA2      | brown | -0.368188279 | 2.98E-15    | 0.74571911   | 1.71E-77    |
| SYNP02     | brown | -0.505184817 | 3.12E-29    | 0.858535017  | 3.11E-126   |
| ANGPT1     | brown | -0.179045961 | 0.000189837 | 0.430867305  | 7.27E-21    |
| ADH1B      | brown | -0.602718319 | 7.09E-44    | 0.731012378  | 4.79E-73    |
| PRIMA1     | brown | -0.514585329 | 1.92E-30    | 0.561048272  | 5.05E-37    |
| ZNF154     | brown | -0.300292647 | 2.07E-10    | 0.558965704  | 1.05E-36    |
| MYH11      | brown | -0.457355361 | 1.29E-23    | 0.7924479    | 6.15E-94    |
| ISCA2      | brown | 0.31182589   | 3.77E-11    | -0.341239275 | 3.46E-13    |
| STAC       | brown | -0.249727794 | 1.55E-07    | 0.362139116  | 9.02E-15    |
| BCAP31     | brown | 0.264353431  | 2.62E-08    | -0.587698962 | 2.72E-41    |
| GSTP1      | brown | 0.101864832  | 0.034715531 | -0.421078553 | 6.58E-20    |
| STON1-GTF2 | brown | -0.484983227 | 9.44E-27    | 0.732522608  | 1.73E-73    |
| RBP4       | brown | -0.125071027 | 0.009426663 | 0.255274988  | 7.99E-08    |
| NELFCD     | brown | 0.350312787  | 7.35E-14    | -0.511036938 | 5.55E-30    |
| C1orf233   | brown | 0.214815062  | 6.99E-06    | -0.300530627 | 2.00E-10    |
| MARGPRE    | brown | -0.244648209 | 2.80E-07    | 0.408857556  | 9.31E-19    |
| DCAF12L2   | brown | -0.195234932 | 4.58E-05    | 0.336563598  | 7.55E-13    |
| CEP68      | brown | -0.251892817 | 1.20E-07    | 0.471940679  | 3.10E-25    |
| SCARF1     | brown | -0.101761991 | 0.034899892 | 0.39752018   | 9.90E-18    |
| PIH1D1     | brown | 0.270829893  | 1.15E-08    | -0.433995255 | 3.54E-21    |
| SMARCD2    | brown | 0.270315594  | 1.23E-08    | -0.409607965 | 7.94E-19    |
| CORO1B     | brown | 0.238429235  | 5.67E-07    | -0.454566954 | 2.58E-23    |
| CASP8      | brown | 0.173841005  | 0.000292373 | -0.246596228 | 2.23E-07    |

|            |       |              |             |              |             |
|------------|-------|--------------|-------------|--------------|-------------|
| CYGB       | brown | -0.31513245  | 2.28E-11    | 0.468904656  | 6.84E-25    |
| AQP1       | brown | -0.414316305 | 2.89E-19    | 0.714659193  | 1.96E-68    |
| SLC25A25   | brown | -0.478546594 | 5.39E-26    | 0.562404903  | 3.13E-37    |
| MRPS9      | brown | 0.093414926  | 0.052905802 | -0.311474971 | 3.97E-11    |
| PRDM5      | brown | -0.222342694 | 3.23E-06    | 0.44477505   | 2.80E-22    |
| CLIC4      | brown | -0.234819506 | 8.47E-07    | 0.638527524  | 1.26E-50    |
| RPUSD1     | brown | 0.348977682  | 9.26E-14    | -0.520186628 | 3.49E-31    |
| NOSTRIN    | brown | -0.208754535 | 1.27E-05    | 0.335411599  | 9.13E-13    |
| ZMAT1      | brown | -0.193795063 | 5.22E-05    | 0.306129037  | 8.82E-11    |
| PELP1      | brown | 0.152127402  | 0.001557066 | -0.294455593 | 4.76E-10    |
| DYSF       | brown | -0.234336615 | 8.94E-07    | 0.638229222  | 1.45E-50    |
| GPR115     | brown | 0.13822153   | 0.004083022 | -0.291002036 | 7.73E-10    |
| FAM124B    | brown | -0.154240152 | 0.001335217 | 0.626490159  | 2.94E-48    |
| ACTN2      | brown | -0.379481455 | 3.55E-16    | 0.598884551  | 3.34E-43    |
| STXBP6     | brown | -0.278881437 | 4.02E-09    | 0.471860731  | 3.16E-25    |
| KLHL42     | brown | -0.253866474 | 9.47E-08    | 0.586122171  | 5.00E-41    |
| MSX1       | brown | -0.254259867 | 9.03E-08    | 0.434547011  | 3.12E-21    |
| MAP6       | brown | -0.229211585 | 1.56E-06    | 0.41182797   | 4.94E-19    |
| RBKS       | brown | -0.320258447 | 1.03E-11    | 0.293405062  | 5.52E-10    |
| ACO04754.3 | brown | -0.301164156 | 1.82E-10    | 0.422864428  | 4.42E-20    |
| ANXA8L1    | brown | 0.130839661  | 0.006588854 | -0.296615121 | 3.51E-10    |
| RPS6KB2    | brown | 0.253523513  | 9.87E-08    | -0.467511447 | 9.81E-25    |
| MTA2       | brown | 0.268807612  | 1.49E-08    | -0.524671193 | 8.71E-32    |
| FERMT1     | brown | 0.233622169  | 9.67E-07    | -0.377956633 | 4.75E-16    |
| SCUBE3     | brown | -0.259942962 | 4.53E-08    | 0.582032146  | 2.38E-40    |
| MLXIP      | brown | -0.278111498 | 4.45E-09    | 0.582865099  | 1.73E-40    |
| MYO18B     | brown | -0.242438325 | 3.60E-07    | 0.314960531  | 2.34E-11    |
| CTAGE4     | brown | 0.133393486  | 0.005597965 | -0.209246923 | 1.21E-05    |
| CFD        | brown | -0.509559279 | 8.62E-30    | 0.533006409  | 6.25E-33    |
| STX6       | brown | 0.259346231  | 4.87E-08    | -0.388415151 | 6.19E-17    |
| CDKN1C     | brown | -0.172209421 | 0.000333925 | 0.26720377   | 1.83E-08    |
| PPARGC1A   | brown | -0.227218865 | 1.93E-06    | 0.340379182  | 4.00E-13    |
| SPR        | brown | 0.157567452  | 0.001044051 | -0.247866271 | 1.93E-07    |
| NACAD      | brown | -0.28362985  | 2.13E-09    | 0.505075493  | 3.22E-29    |
| PAN01      | brown | 0.220247369  | 4.02E-06    | -0.254514814 | 8.76E-08    |
| DAGLB      | brown | 0.358403729  | 1.77E-14    | -0.409472278 | 8.17E-19    |
| IL17RA     | brown | 0.214511938  | 7.20E-06    | -0.17591174  | 0.000246576 |
| CSTA       | brown | 0.089663709  | 0.063220549 | -0.323592503 | 6.13E-12    |
| RP11-195F1 | brown | -0.144329342 | 0.0027008   | 0.267656989  | 1.73E-08    |
| YARS2      | brown | 0.317785973  | 1.52E-11    | -0.483606723 | 1.37E-26    |
| C12orf45   | brown | 0.212301201  | 8.98E-06    | -0.317713552 | 1.53E-11    |
| RASSF2     | brown | -0.172707657 | 0.000320686 | 0.407713267  | 1.19E-18    |
| EIF1B      | brown | -0.182934507 | 0.0001364   | 0.298785412  | 2.57E-10    |
| SCRIB      | brown | 0.256794152  | 6.65E-08    | -0.477005521 | 8.13E-26    |
| GPR20      | brown | -0.067835708 | 0.160260958 | 0.215398009  | 6.59E-06    |
| MAP1LC3A   | brown | -0.105703826 | 0.028402322 | 0.171660493  | 0.0003491   |
| DLG4       | brown | -0.088634999 | 0.066322199 | 0.323815922  | 5.92E-12    |
| UFSP2      | brown | -0.264883586 | 2.45E-08    | 0.399889174  | 6.09E-18    |
| LRRC45     | brown | 0.403549036  | 2.85E-18    | -0.520733974 | 2.95E-31    |
| FGF2       | brown | -0.430927488 | 7.17E-21    | 0.749980546  | 7.68E-79    |
| NTF3       | brown | -0.381471883 | 2.41E-16    | 0.327217911  | 3.45E-12    |

|          |       |              |             |              |             |
|----------|-------|--------------|-------------|--------------|-------------|
| ELF4     | brown | 0.182608102  | 0.000140275 | -0.322569101 | 7.21E-12    |
| PIN4     | brown | 0.231736107  | 1.19E-06    | -0.399041334 | 7.25E-18    |
| ADCY5    | brown | -0.482334998 | 1.94E-26    | 0.762957823  | 4.09E-83    |
| MRPS18A  | brown | 0.122221697  | 0.011194051 | -0.3627281   | 8.11E-15    |
| CLDN5    | brown | -0.364561939 | 5.81E-15    | 0.542963036  | 2.43E-34    |
| PRR13    | brown | 0.216864839  | 5.68E-06    | -0.351133591 | 6.37E-14    |
| DMKN     | brown | 0.097661875  | 0.042959287 | -0.201551256 | 2.55E-05    |
| PDK2     | brown | -0.173273759 | 0.000306239 | 0.315145134  | 2.28E-11    |
| PPAP2B   | brown | -0.433804588 | 3.70E-21    | 0.663101143  | 8.41E-56    |
| PCDH10   | brown | -0.153113955 | 0.001449572 | 0.377009123  | 5.69E-16    |
| TNIK     | brown | -0.197685837 | 3.66E-05    | 0.294833222  | 4.51E-10    |
| ANXA8    | brown | 0.124206539  | 0.009934678 | -0.292080085 | 6.65E-10    |
| ITGA3    | brown | 0.131388256  | 0.006363632 | -0.276888892 | 5.23E-09    |
| VARS     | brown | 0.309703956  | 5.18E-11    | -0.416111763 | 1.96E-19    |
| ZBTB16   | brown | -0.497325792 | 3.02E-28    | 0.734848066  | 3.54E-74    |
| HSPB2    | brown | -0.414111834 | 3.02E-19    | 0.70350818   | 1.80E-65    |
| DERL2    | brown | 0.218410179  | 4.85E-06    | -0.25837837  | 5.49E-08    |
| CBLC     | brown | 0.213604139  | 7.89E-06    | -0.495976458 | 4.42E-28    |
| NMB      | brown | 0.27409424   | 7.55E-09    | -0.357397571 | 2.11E-14    |
| MRM1     | brown | 0.341007447  | 3.60E-13    | -0.418479753 | 1.17E-19    |
| CCND2    | brown | -0.292406282 | 6.35E-10    | 0.546941662  | 6.46E-35    |
| TLE3     | brown | 0.127528726  | 0.008106233 | -0.204981057 | 1.84E-05    |
| CLIP3    | brown | -0.375664428 | 7.35E-16    | 0.787248537  | 6.63E-92    |
| RGAG4    | brown | -0.360879487 | 1.13E-14    | 0.567405457  | 5.25E-38    |
| CLNS1A   | brown | 0.192204823  | 6.03E-05    | -0.349491291 | 8.47E-14    |
| PRR29    | brown | -0.040686378 | 0.400021217 | 0.069308156  | 0.151359279 |
| WDR74    | brown | 0.274738851  | 6.94E-09    | -0.50784919  | 1.43E-29    |
| CAMLG    | brown | -0.137785316 | 0.004202801 | 0.232988642  | 1.04E-06    |
| NHSL2    | brown | -0.331287134 | 1.79E-12    | 0.646816011  | 2.56E-52    |
| ABCC10   | brown | 0.298255556  | 2.77E-10    | -0.326222676 | 4.04E-12    |
| PIP5KL1  | brown | 0.155986613  | 0.001174188 | -0.243706083 | 3.12E-07    |
| SOX5     | brown | -0.408064483 | 1.10E-18    | 0.662520337  | 1.13E-55    |
| FAM218A  | brown | -0.080966567 | 0.093576669 | 0.259041404  | 5.06E-08    |
| FAM131A  | brown | -0.179740924 | 0.000179036 | 0.210394748  | 1.09E-05    |
| LMO3     | brown | -0.424058944 | 3.39E-20    | 0.706695837  | 2.65E-66    |
| TBRG4    | brown | 0.365523233  | 4.87E-15    | -0.590510875 | 9.15E-42    |
| AHSA1    | brown | 0.26672988   | 1.94E-08    | -0.366695873 | 3.93E-15    |
| SEL1L2   | brown | -0.221830501 | 3.41E-06    | 0.513823665  | 2.41E-30    |
| QPCTL    | brown | 0.287731657  | 1.22E-09    | -0.388513688 | 6.08E-17    |
| MGLL     | brown | -0.361214106 | 1.07E-14    | 0.516134181  | 1.20E-30    |
| ATP1B2   | brown | -0.484110475 | 1.20E-26    | 0.678025705  | 3.42E-59    |
| PTGIS    | brown | -0.355316774 | 3.06E-14    | 0.733557164  | 8.54E-74    |
| ARHGEF26 | brown | -0.288278619 | 1.13E-09    | 0.432009415  | 5.59E-21    |
| TELO2    | brown | 0.270802226  | 1.16E-08    | -0.465969283 | 1.46E-24    |
| CNIH4    | brown | 0.304191508  | 1.17E-10    | -0.44379331  | 3.54E-22    |
| IRF6     | brown | 0.161050399  | 0.000802891 | -0.436655356 | 1.91E-21    |
| ACSS3    | brown | -0.149269936 | 0.00191102  | 0.302733002  | 1.45E-10    |
| STAP2    | brown | 0.259633947  | 4.70E-08    | -0.558126208 | 1.41E-36    |
| ACOT13   | brown | 0.207540367  | 1.43E-05    | -0.260336065 | 4.31E-08    |
| LONRF3   | brown | -0.210086178 | 1.12E-05    | 0.281765235  | 2.74E-09    |
| SCARA5   | brown | -0.687940632 | 1.47E-61    | 0.780455014  | 2.47E-89    |

|            |       |              |             |              |             |
|------------|-------|--------------|-------------|--------------|-------------|
| SCARA3     | brown | -0.190263955 | 7.18E-05    | 0.398629981  | 7.89E-18    |
| RCAN2      | brown | -0.499158277 | 1.79E-28    | 0.824534947  | 6.50E-108   |
| CSDC2      | brown | -0.271054187 | 1.12E-08    | 0.705610088  | 5.11E-66    |
| DBI        | brown | 0.251214366  | 1.30E-07    | -0.407982372 | 1.12E-18    |
| SERPINB5   | brown | -0.003700032 | 0.939019393 | -0.251539511 | 1.25E-07    |
| STX1A      | brown | 0.196597944  | 4.04E-05    | -0.268785229 | 1.50E-08    |
| GYG2       | brown | -0.067672408 | 0.161271985 | 0.294009539  | 5.07E-10    |
| CPSF3L     | brown | 0.237196153  | 6.51E-07    | -0.428168867 | 1.34E-20    |
| GSPT2      | brown | -0.133828885 | 0.005443084 | 0.270394713  | 1.22E-08    |
| EDNRB      | brown | -0.33255301  | 1.46E-12    | 0.564997369  | 1.24E-37    |
| DISP1      | brown | -0.322127907 | 7.72E-12    | 0.525821892  | 6.08E-32    |
| ATPIF1     | brown | 0.326921766  | 3.62E-12    | -0.597833451 | 5.08E-43    |
| SMPDL3A    | brown | -0.162834486 | 0.000700388 | 0.20950261   | 1.18E-05    |
| FAM129A    | brown | -0.376181592 | 6.66E-16    | 0.740132161  | 9.07E-76    |
| COPS5      | brown | 0.256505579  | 6.89E-08    | -0.368380771 | 2.88E-15    |
| RP11-766F1 | brown | -0.242750508 | 3.48E-07    | 0.490830432  | 1.88E-27    |
| PDE1A      | brown | -0.466326371 | 1.33E-24    | 0.884691562  | 6.01E-144   |
| S1PR1      | brown | -0.325467685 | 4.56E-12    | 0.727503859  | 4.99E-72    |
| SYBU       | brown | -0.178156079 | 0.00020456  | 0.307861525  | 6.82E-11    |
| KCNH2      | brown | -0.382210575 | 2.09E-16    | 0.619557953  | 6.09E-47    |
| GIPC3      | brown | -0.011740038 | 0.808201918 | 0.324274776  | 5.51E-12    |
| EGFL7      | brown | -0.140471664 | 0.003512812 | 0.290767244  | 7.99E-10    |
| IFNGR2     | brown | 0.24768763   | 1.97E-07    | -0.287593906 | 1.24E-09    |
| MGAT4B     | brown | 0.342950419  | 2.60E-13    | -0.418673778 | 1.12E-19    |
| EDA2R      | brown | -0.140801496 | 0.003435588 | 0.341714259  | 3.20E-13    |
| DVL1       | brown | 0.175137225  | 0.000262858 | -0.375213255 | 8.01E-16    |
| AUP1       | brown | 0.40436149   | 2.40E-18    | -0.622251934 | 1.89E-47    |
| ATP5J2     | brown | 0.373153558  | 1.18E-15    | -0.601927612 | 9.78E-44    |
| CCDC50     | brown | -0.19755629  | 3.70E-05    | 0.507316874  | 1.67E-29    |
| DTNA       | brown | -0.474165503 | 1.73E-25    | 0.78920646   | 1.16E-92    |
| MBNL2      | brown | -0.140918225 | 0.003408629 | 0.378229809  | 4.51E-16    |
| RND1       | brown | -0.286637429 | 1.41E-09    | 0.227249354  | 1.93E-06    |
| TFAP4      | brown | 0.336380148  | 7.79E-13    | -0.463250641 | 2.92E-24    |
| MAPRE2     | brown | -0.263966244 | 2.75E-08    | 0.715500096  | 1.16E-68    |
| BRE        | brown | -0.151727131 | 0.001602729 | 0.163637565  | 0.000658324 |
| FLT4       | brown | -0.045745693 | 0.343976676 | 0.38516966   | 1.17E-16    |
| AKT3       | brown | -0.269378153 | 1.39E-08    | 0.673668814  | 3.50E-58    |
| WWOX       | brown | -0.133853459 | 0.005434459 | 0.243607657  | 3.15E-07    |
| FBX031     | brown | -0.28504941  | 1.75E-09    | 0.516591419  | 1.05E-30    |
| ARNT2      | brown | -0.15059866  | 0.001738158 | 0.2873404    | 1.28E-09    |
| OPN1SW     | brown | -0.179669081 | 0.000180125 | 0.532390952  | 7.61E-33    |
| PLCB3      | brown | 0.322484449  | 7.30E-12    | -0.53556768  | 2.74E-33    |
| SELENBP1   | brown | -0.215615331 | 6.44E-06    | 0.181990186  | 0.000147895 |
| CD58       | brown | 0.080526427  | 0.095379261 | -0.276744891 | 5.33E-09    |
| LYNX1      | brown | -0.231749727 | 1.19E-06    | 0.20282733   | 2.26E-05    |
| TMTC1      | brown | -0.286981915 | 1.35E-09    | 0.54636597   | 7.83E-35    |
| INMT-FAM18 | brown | -0.565532524 | 1.03E-37    | 0.622052694  | 2.06E-47    |
| MOV10      | brown | 0.332629979  | 1.44E-12    | -0.427993848 | 1.40E-20    |
| RRS1       | brown | 0.169667709  | 0.00040976  | -0.350193477 | 7.50E-14    |
| SLC22A18   | brown | 0.129215066  | 0.007298307 | -0.329763024 | 2.29E-12    |
| IER2       | brown | -0.227290006 | 1.92E-06    | 0.06029199   | 0.212127254 |

|            |       |              |             |              |             |
|------------|-------|--------------|-------------|--------------|-------------|
| C2CD4D     | brown | 0.104651467  | 0.030026314 | -0.18576058  | 0.000106811 |
| CIA01      | brown | 0.269173019  | 1.42E-08    | -0.355890557 | 2.76E-14    |
| MBD2       | brown | 0.105600415  | 0.028558492 | -0.267562864 | 1.75E-08    |
| SEMA4C     | brown | -0.101881493 | 0.034685742 | 0.183783152  | 0.000126791 |
| LGI4       | brown | -0.456139157 | 1.75E-23    | 0.564276999  | 1.61E-37    |
| THBS4      | brown | -0.051888917 | 0.283009724 | 0.555762581  | 3.19E-36    |
| TSHB       | brown | -0.46701255  | 1.12E-24    | 0.656160701  | 2.73E-54    |
| LXN        | brown | -0.04262059  | 0.377978331 | 0.273000561  | 8.70E-09    |
| COX4I2     | brown | -0.141958202 | 0.003176782 | 0.191635342  | 6.35E-05    |
| MSANTD3-TM | brown | -0.186043578 | 0.000104206 | 0.424169201  | 3.31E-20    |
| TCEAL4     | brown | -0.206216122 | 1.63E-05    | 0.24538355   | 2.57E-07    |
| PBXIP1     | brown | -0.27857124  | 4.19E-09    | 0.361011949  | 1.11E-14    |
| OR5K2      | brown | -0.240637983 | 4.42E-07    | 0.457926454  | 1.12E-23    |
| ABRACL     | brown | 0.329118095  | 2.54E-12    | -0.506813829 | 1.94E-29    |
| STK40      | brown | -0.343812051 | 2.24E-13    | 0.424643292  | 2.97E-20    |
| MFSD10     | brown | 0.294628071  | 4.65E-10    | -0.517692503 | 7.48E-31    |
| GPR135     | brown | -0.286298783 | 1.48E-09    | 0.652990558  | 1.30E-53    |
| PLEK2      | brown | 0.201641736  | 2.53E-05    | -0.459714476 | 7.15E-24    |
| CIB1       | brown | 0.177087833  | 0.000223645 | -0.450257696 | 7.45E-23    |
| PABPC5     | brown | -0.335329944 | 9.26E-13    | 0.612924005  | 1.03E-45    |
| EEF1E1     | brown | 0.328190922  | 2.95E-12    | -0.427108056 | 1.71E-20    |
| ZDBF2      | brown | -0.201374351 | 2.59E-05    | 0.361258542  | 1.06E-14    |
| GDF10      | brown | -0.515596985 | 1.41E-30    | 0.64626645   | 3.33E-52    |
| SNTA1      | brown | -0.205309382 | 1.78E-05    | 0.268065997  | 1.64E-08    |
| MS4A2      | brown | -0.403631975 | 2.80E-18    | 0.706346301  | 3.27E-66    |
| ARL10      | brown | -0.084967332 | 0.078412008 | 0.351854271  | 5.62E-14    |
| RHOJ       | brown | -0.376406847 | 6.38E-16    | 0.787866276  | 3.83E-92    |
| CACTIN     | brown | 0.24298621   | 3.38E-07    | -0.360706613 | 1.17E-14    |
| AXIN1      | brown | 0.162771045  | 0.000703815 | -0.314821196 | 2.39E-11    |
| PA2G4      | brown | 0.241384347  | 4.06E-07    | -0.501305405 | 9.64E-29    |
| PIAS4      | brown | 0.255576793  | 7.71E-08    | -0.379396141 | 3.60E-16    |
| VAMP2      | brown | -0.286549853 | 1.43E-09    | 0.389371819  | 5.12E-17    |
| OSBPL1A    | brown | -0.220276324 | 4.00E-06    | 0.40081941   | 5.02E-18    |
| ADIPOR1    | brown | 0.167420899  | 0.000489852 | -0.250785366 | 1.37E-07    |
| TMUB1      | brown | 0.377829896  | 4.87E-16    | -0.548041638 | 4.46E-35    |
| TRIM27     | brown | 0.276526055  | 5.49E-09    | -0.3621786   | 8.96E-15    |
| CSRP1      | brown | -0.459901981 | 6.82E-24    | 0.76872451   | 4.19E-85    |
| PCDHGA9    | brown | -0.161530818 | 0.000774004 | 0.460680402  | 5.61E-24    |
| IL23A      | brown | 0.105484874  | 0.028733852 | -0.186397315 | 0.000101035 |
| G6PC3      | brown | 0.23799761   | 5.95E-07    | -0.340616774 | 3.85E-13    |
| ADPRM      | brown | -0.158732416 | 0.000956808 | 0.274183683  | 7.46E-09    |
| HM13       | brown | 0.359772561  | 1.38E-14    | -0.423358186 | 3.96E-20    |
| COA4       | brown | 0.269691224  | 1.33E-08    | -0.4746122   | 1.53E-25    |
| RAP1A      | brown | -0.360952893 | 1.12E-14    | 0.622523921  | 1.68E-47    |
| LMO4       | brown | -0.066119038 | 0.171130442 | 0.166763617  | 0.000515898 |
| SLC24A3    | brown | -0.381025851 | 2.63E-16    | 0.562152083  | 3.42E-37    |
| RANBP3L    | brown | -0.507495904 | 1.59E-29    | 0.82437517   | 7.75E-108   |
| CTTN       | brown | 0.129013357  | 0.007390998 | -0.289203821 | 9.92E-10    |
| C14orf80   | brown | 0.250922857  | 1.34E-07    | -0.46157788  | 4.47E-24    |
| LPAR5      | brown | 0.201217918  | 2.63E-05    | -0.266948781 | 1.89E-08    |
| LRRC2      | brown | -0.597743363 | 5.27E-43    | 0.833418957  | 2.69E-112   |

|          |       |              |             |              |             |
|----------|-------|--------------|-------------|--------------|-------------|
| DGKG     | brown | -0.347945864 | 1.11E-13    | 0.501838571  | 8.26E-29    |
| PRAC2    | brown | -0.201550963 | 2.55E-05    | 0.1864486    | 0.000100583 |
| SLC19A1  | brown | 0.353146935  | 4.48E-14    | -0.36838142  | 2.88E-15    |
| CPNE6    | brown | -0.422298228 | 5.02E-20    | 0.523154704  | 1.40E-31    |
| MPHOSPH6 | brown | 0.15989608   | 0.000876424 | -0.314575354 | 2.48E-11    |
| FBXL6    | brown | 0.441275726  | 6.45E-22    | -0.574141615 | 4.52E-39    |
| BMPER    | brown | -0.179859551 | 0.000177251 | 0.280134693  | 3.40E-09    |
| RHOQ     | brown | -0.169565472 | 0.000413123 | 0.397141052  | 1.07E-17    |
| ARHGEF15 | brown | -0.245261482 | 2.61E-07    | 0.539398939  | 7.88E-34    |
| RASGEF1C | brown | -0.209068965 | 1.24E-05    | 0.229327128  | 1.54E-06    |
| BAX      | brown | 0.370290117  | 2.02E-15    | -0.425234626 | 2.60E-20    |
| TLDC1    | brown | 0.1639959    | 0.000640322 | -0.322498322 | 7.29E-12    |
| ZFP2     | brown | -0.279844726 | 3.54E-09    | 0.457553246  | 1.23E-23    |
| GSS      | brown | 0.349769533  | 8.08E-14    | -0.592466357 | 4.26E-42    |
| STK32B   | brown | -0.306914315 | 7.85E-11    | 0.662825731  | 9.67E-56    |
| MCRS1    | brown | 0.279105892  | 3.90E-09    | -0.414744987 | 2.63E-19    |
| TFAP2A   | brown | 0.190460305  | 7.06E-05    | -0.326778513 | 3.70E-12    |
| KLHL41   | brown | -0.580561826 | 4.14E-40    | 0.821497382  | 1.80E-106   |
| NME1     | brown | 0.461708922  | 4.32E-24    | -0.631793122 | 2.74E-49    |
| CAPN6    | brown | -0.110244297 | 0.022231268 | 0.303434039  | 1.31E-10    |
| FIGLA    | brown | -0.172439448 | 0.000327751 | 0.173359557  | 0.000304103 |
| IER5L    | brown | 0.366173825  | 4.32E-15    | -0.354671152 | 3.43E-14    |
| TRPA1    | brown | -0.247340858 | 2.05E-07    | 0.221370438  | 3.57E-06    |
| CSNK1A1L | brown | -0.11849949  | 0.01394124  | 0.264888233  | 2.45E-08    |
| KIT      | brown | -0.210557078 | 1.07E-05    | 0.322543482  | 7.23E-12    |
| ATP6V1G1 | brown | 0.16586668   | 0.00055352  | -0.288868802 | 1.04E-09    |
| SEMA3E   | brown | -0.393736922 | 2.14E-17    | 0.480684627  | 3.03E-26    |
| CAPZA2   | brown | -0.248229124 | 1.85E-07    | 0.501784986  | 8.39E-29    |
| EPM2A    | brown | -0.479444626 | 4.24E-26    | 0.740222532  | 8.51E-76    |
| GRIN2D   | brown | 0.23607211   | 7.38E-07    | -0.256563665 | 6.84E-08    |
| SHE      | brown | -0.336004286 | 8.28E-13    | 0.729938618  | 9.85E-73    |
| PCDHB4   | brown | -0.178615616 | 0.000196829 | 0.301179347  | 1.82E-10    |
| AKAP6    | brown | -0.481675125 | 2.32E-26    | 0.835556845  | 2.17E-113   |
| KRT10    | brown | 0.12443134   | 0.009800288 | -0.309008983 | 5.75E-11    |
| MANF     | brown | 0.348119726  | 1.07E-13    | -0.360433592 | 1.23E-14    |
| TPSG1    | brown | -0.51466033  | 1.87E-30    | 0.76724714   | 1.37E-84    |
| PCSK1    | brown | -0.042526283 | 0.379035481 | 0.403275095  | 3.02E-18    |
| CAMK1    | brown | -0.201701374 | 2.51E-05    | 0.501866401  | 8.19E-29    |
| SEMA6D   | brown | -0.157361022 | 0.001060255 | 0.413700699  | 3.30E-19    |
| HECW2    | brown | 0.04370688   | 0.365932276 | 0.277091481  | 5.10E-09    |
| KCNQ4    | brown | -0.345142248 | 1.79E-13    | 0.594657929  | 1.80E-42    |
| VWF      | brown | -0.203058486 | 2.21E-05    | 0.562117605  | 3.46E-37    |
| SDF2     | brown | 0.205754897  | 1.71E-05    | -0.308607896 | 6.11E-11    |
| RASL11A  | brown | -0.345780787 | 1.60E-13    | 0.519714441  | 4.03E-31    |
| VSTM4    | brown | -0.468656372 | 7.29E-25    | 0.822375668  | 6.93E-107   |
| PALM     | brown | -0.245380249 | 2.57E-07    | 0.476552797  | 9.17E-26    |
| EBP      | brown | 0.35987745   | 1.36E-14    | -0.58066829  | 3.98E-40    |
| ARMCX1   | brown | -0.283000031 | 2.32E-09    | 0.527036794  | 4.15E-32    |
| TREX2    | brown | 0.112713563  | 0.019390916 | -0.21055575  | 1.07E-05    |
| BDKRB1   | brown | -0.4015229   | 4.34E-18    | 0.449679231  | 8.57E-23    |
| SYMPK    | brown | 0.308458061  | 6.24E-11    | -0.385833141 | 1.03E-16    |



|          |       |              |             |              |             |
|----------|-------|--------------|-------------|--------------|-------------|
| TLN2     | brown | -0.197281142 | 3.80E-05    | 0.404594786  | 2.29E-18    |
| LYPLA2   | brown | 0.370270229  | 2.03E-15    | -0.604956434 | 2.84E-44    |
| GTPBP3   | brown | 0.389059365  | 5.45E-17    | -0.508322987 | 1.24E-29    |
| FAM167B  | brown | 0.05273374   | 0.27523489  | 0.140715516  | 0.003455569 |
| FGF13    | brown | -0.292707228 | 6.09E-10    | 0.458951287  | 8.67E-24    |
| PKP3     | brown | 0.274418597  | 7.24E-09    | -0.570774031 | 1.55E-38    |
| ARHGEF5  | brown | 0.158644446  | 0.000963154 | -0.323459057 | 6.26E-12    |
| PERP     | brown | 0.165693626  | 0.000561065 | -0.428709954 | 1.19E-20    |
| MEOX2    | brown | -0.293924362 | 5.13E-10    | 0.657198995  | 1.63E-54    |
| EIF4EBP1 | brown | 0.316707414  | 1.79E-11    | -0.383566612 | 1.61E-16    |
| ZFHX4    | brown | -0.280102357 | 3.42E-09    | 0.558873022  | 1.08E-36    |
| KHDRBS3  | brown | -0.099275735 | 0.039617139 | 0.287594842  | 1.24E-09    |
| LIMS2    | brown | -0.466086553 | 1.42E-24    | 0.806400851  | 1.08E-99    |
| SAMD4A   | brown | -0.365150218 | 5.22E-15    | 0.641243854  | 3.56E-51    |
| LHX4-AS1 | brown | 0.268476733  | 1.56E-08    | -0.301301293 | 1.79E-10    |
| CRYAB    | brown | -0.404775986 | 2.20E-18    | 0.707728772  | 1.42E-66    |
| DCLK2    | brown | -0.184444472 | 0.000119748 | 0.545679298  | 9.86E-35    |
| SOBP     | brown | -0.496941811 | 3.36E-28    | 0.828822385  | 5.36E-110   |
| MAPKAPK3 | brown | 0.142856755  | 0.002988099 | -0.237512629 | 6.28E-07    |
| VIPR2    | brown | -0.59741603  | 6.01E-43    | 0.620778414  | 3.59E-47    |
| COLEC11  | brown | -0.217682555 | 5.22E-06    | 0.26383605   | 2.80E-08    |
| GSTK1    | brown | 0.192810843  | 5.71E-05    | -0.294186767 | 4.95E-10    |
| PYGB     | brown | -0.237098847 | 6.58E-07    | 0.388573658  | 6.00E-17    |
| RGS22    | brown | -0.550705195 | 1.81E-35    | 0.743127934  | 1.09E-76    |
| SYCE3    | brown | 0.137063909  | 0.004407875 | -0.225288131 | 2.37E-06    |
| BVES     | brown | -0.338286523 | 5.68E-13    | 0.615643739  | 3.27E-46    |
| HSPB6    | brown | -0.507522907 | 1.57E-29    | 0.816258541  | 4.76E-104   |
| TRMT2A   | brown | 0.333379855  | 1.27E-12    | -0.480986709 | 2.80E-26    |
| SCAMP4   | brown | 0.296333023  | 3.65E-10    | -0.384144735 | 1.44E-16    |
| NOS3     | brown | -0.143493212 | 0.00286068  | 0.483380743  | 1.46E-26    |
| ABL1     | brown | -0.346359043 | 1.45E-13    | 0.685104536  | 7.16E-61    |
| NFS1     | brown | 0.280090024  | 3.42E-09    | -0.369873672 | 2.18E-15    |
| DTD1     | brown | 0.247538461  | 2.00E-07    | -0.357222664 | 2.18E-14    |
| MEN1     | brown | 0.487881186  | 4.26E-27    | -0.603015189 | 6.28E-44    |
| MITD1    | brown | 0.282000228  | 2.65E-09    | -0.350904549 | 6.63E-14    |
| SRR      | brown | -0.094881511 | 0.049273723 | 0.265194094  | 2.36E-08    |
| ZSWIM4   | brown | 0.239726327  | 4.90E-07    | -0.193692709 | 5.27E-05    |
| DCP1B    | brown | -0.109335753 | 0.023363585 | 0.249338735  | 1.62E-07    |
| MAGOH    | brown | 0.306277694  | 8.63E-11    | -0.524679372 | 8.69E-32    |
| PYGM     | brown | -0.607446724 | 1.02E-44    | 0.864831354  | 3.74E-130   |
| HES4     | brown | 0.171551014  | 0.000352202 | -0.355460958 | 2.98E-14    |
| FAM32A   | brown | 0.204269023  | 1.97E-05    | -0.295442053 | 4.14E-10    |
| ARTN     | brown | 0.14261262   | 0.003038329 | -0.271713985 | 1.03E-08    |
| CD93     | brown | -0.213571284 | 7.92E-06    | 0.634132978  | 9.48E-50    |
| DIRC3    | brown | -0.235299769 | 8.03E-07    | 0.452662464  | 4.13E-23    |
| DPY30    | brown | 0.333254003  | 1.30E-12    | -0.493299696 | 9.42E-28    |
| KLHL30   | brown | -0.299002722 | 2.49E-10    | 0.460436312  | 5.96E-24    |
| NEDD9    | brown | -0.155695895 | 0.001199688 | 0.2438665    | 3.06E-07    |
| TMEM136  | brown | -0.130856485 | 0.006581843 | 0.371075887  | 1.74E-15    |
| BAI3     | brown | -0.447857424 | 1.33E-22    | 0.601776809  | 1.04E-43    |
| PEAK1    | brown | -0.214003336 | 7.58E-06    | 0.662067884  | 1.42E-55    |

|          |       |              |             |              |           |
|----------|-------|--------------|-------------|--------------|-----------|
| INMT     | brown | -0.389512583 | 4.98E-17    | 0.679678106  | 1.40E-59  |
| IL3RA    | brown | -0.171034422 | 0.000367191 | 0.422478597  | 4.82E-20  |
| MRPS15   | brown | 0.35065942   | 6.92E-14    | -0.540331994 | 5.80E-34  |
| PER1     | brown | -0.414926165 | 2.53E-19    | 0.551996647  | 1.17E-35  |
| LCN10    | brown | -0.30432917  | 1.15E-10    | 0.501189613  | 9.96E-29  |
| LAMB3    | brown | 0.066268904  | 0.170160158 | -0.274535778 | 7.13E-09  |
| B4GAT1   | brown | -0.126858294 | 0.008448991 | 0.346852648  | 1.34E-13  |
| EXOSC5   | brown | 0.275192753  | 6.54E-09    | -0.514422841 | 2.01E-30  |
| NAALAD2  | brown | -0.184463433 | 0.000119552 | 0.32291458   | 6.82E-12  |
| DIRAS3   | brown | -0.270504344 | 1.20E-08    | 0.578374884  | 9.40E-40  |
| HRSP12   | brown | 0.170490638  | 0.000383609 | -0.262151034 | 3.45E-08  |
| KBTBD13  | brown | -0.268083997 | 1.64E-08    | 0.597206619  | 6.53E-43  |
| DUS2     | brown | 0.235856626  | 7.55E-07    | -0.407573417 | 1.22E-18  |
| ADAMTSL3 | brown | -0.620247794 | 4.52E-47    | 0.841666234  | 1.33E-116 |
| SHF      | brown | -0.177355874 | 0.000218705 | 0.239365501  | 5.10E-07  |
| BLOC1S2  | brown | 0.270631158  | 1.18E-08    | -0.349558872 | 8.38E-14  |
| TLN1     | brown | -0.334023094 | 1.15E-12    | 0.743410515  | 8.92E-77  |
| ANGPTL7  | brown | -0.486490399 | 6.25E-27    | 0.792645959  | 5.14E-94  |
| P2RX1    | brown | -0.495141614 | 5.60E-28    | 0.828569346  | 7.14E-110 |
| SDPR     | brown | -0.526416615 | 5.05E-32    | 0.835081214  | 3.82E-113 |
| CYYR1    | brown | -0.310071394 | 4.91E-11    | 0.607608968  | 9.53E-45  |
| GNB1L    | brown | 0.175241574  | 0.000260607 | -0.27093047  | 1.14E-08  |
| LSM11    | brown | -0.278153725 | 4.43E-09    | 0.677100536  | 5.63E-59  |
| TMEM54   | brown | 0.216016875  | 6.19E-06    | -0.516694971 | 1.01E-30  |
| LAD1     | brown | 0.240205391  | 4.64E-07    | -0.524077823 | 1.05E-31  |
| CA9      | brown | 0.196975594  | 3.90E-05    | -0.359947977 | 1.34E-14  |
| MRPL15   | brown | 0.25179479   | 1.21E-07    | -0.380093921 | 3.15E-16  |
| RCVRN    | brown | -0.350421975 | 7.21E-14    | 0.619752563  | 5.60E-47  |
| AGRN     | brown | 0.389653364  | 4.84E-17    | -0.469414462 | 5.99E-25  |
| FXYP1    | brown | -0.584683507 | 8.67E-41    | 0.651545955  | 2.62E-53  |
| PPP2R5A  | brown | -0.283519065 | 2.16E-09    | 0.293017166  | 5.83E-10  |
| GALT     | brown | 0.120527473  | 0.012378732 | -0.213053347 | 8.34E-06  |
| TSFM     | brown | 0.252669195  | 1.09E-07    | -0.416275823 | 1.89E-19  |
| TRABD    | brown | 0.26193026   | 3.54E-08    | -0.531783066 | 9.24E-33  |
| ZDHHC16  | brown | 0.402242091  | 3.74E-18    | -0.486468126 | 6.29E-27  |
| ZFPM2    | brown | -0.403992847 | 2.60E-18    | 0.79275311   | 4.66E-94  |
| COPZ1    | brown | 0.36892753   | 2.60E-15    | -0.448519307 | 1.14E-22  |
| PRRG2    | brown | 0.253772483  | 9.58E-08    | -0.515633614 | 1.40E-30  |
| PTPN6    | brown | 0.283966693  | 2.03E-09    | -0.409518112 | 8.09E-19  |
| PTH1R    | brown | -0.459316936 | 7.91E-24    | 0.68984835   | 5.04E-62  |
| TRMT1    | brown | 0.255439834  | 7.84E-08    | -0.461215853 | 4.90E-24  |
| KLF2     | brown | -0.473705597 | 1.95E-25    | 0.670622787  | 1.74E-57  |
| PCDHB7   | brown | -0.111123247 | 0.021181404 | 0.323018765  | 6.71E-12  |
| KIAA1462 | brown | -0.24763026  | 1.98E-07    | 0.67407064   | 2.83E-58  |
| TRUB2    | brown | 0.266230963  | 2.07E-08    | -0.440168964 | 8.37E-22  |
| WIPF3    | brown | -0.12815062  | 0.007799437 | 0.34313516   | 2.52E-13  |
| FLNC     | brown | -0.453770381 | 3.15E-23    | 0.822173039  | 8.63E-107 |
| C1QBP    | brown | 0.127437123  | 0.008152322 | -0.291891763 | 6.83E-10  |
| CUX1     | brown | -0.134106239 | 0.005346444 | 0.333431229  | 1.26E-12  |
| ANKZF1   | brown | 0.237509755  | 6.29E-07    | -0.419738737 | 8.84E-20  |
| ACOT1    | brown | -0.126876793 | 0.008439363 | 0.348324833  | 1.04E-13  |

|           |       |              |             |              |          |
|-----------|-------|--------------|-------------|--------------|----------|
| IRF3      | brown | 0.329880476  | 2.25E-12    | -0.525744417 | 6.23E-32 |
| ICT1      | brown | 0.333530599  | 1.24E-12    | -0.529297813 | 2.04E-32 |
| SMUG1     | brown | 0.402490772  | 3.55E-18    | -0.554120102 | 5.63E-36 |
| GATA5     | brown | -0.467826139 | 9.04E-25    | 0.798908517  | 1.52E-96 |
| SLITRK3   | brown | -0.205267865 | 1.79E-05    | 0.455460426  | 2.07E-23 |
| C10orf107 | brown | -0.25658097  | 6.83E-08    | 0.475353174  | 1.26E-25 |
| PLCB4     | brown | -0.439248929 | 1.04E-21    | 0.611261048  | 2.08E-45 |
| VTN       | brown | -0.070139682 | 0.146500933 | 0.3576138    | 2.03E-14 |
| ANGPTL5   | brown | -0.246186609 | 2.34E-07    | 0.25968974   | 4.67E-08 |
| ANP32A    | brown | 0.274865495  | 6.83E-09    | -0.391250527 | 3.52E-17 |
| CXorf40B  | brown | 0.154628662  | 0.001297732 | -0.263026235 | 3.09E-08 |
| TACR2     | brown | -0.459885271 | 6.85E-24    | 0.77635468   | 7.95E-88 |
| ZNF575    | brown | -0.044229064 | 0.360227613 | 0.255487392  | 7.79E-08 |
| ITGA7     | brown | -0.367358317 | 3.48E-15    | 0.801035859  | 2.00E-97 |
| IGSF9     | brown | 0.259003309  | 5.08E-08    | -0.404598775 | 2.29E-18 |
| FGF6      | brown | -0.41770887  | 1.38E-19    | 0.557140673  | 1.98E-36 |
| CDH3      | brown | 0.208764132  | 1.27E-05    | -0.299284483 | 2.39E-10 |
| ZDHH15    | brown | -0.216434189 | 5.93E-06    | 0.379702015  | 3.40E-16 |
| ELOVL1    | brown | 0.226749556  | 2.03E-06    | -0.41752267  | 1.44E-19 |
| PRKD2     | brown | 0.293071338  | 5.79E-10    | -0.488227613 | 3.87E-27 |
| GPR39     | brown | 0.116528934  | 0.015623108 | -0.221997392 | 3.35E-06 |
| PI16      | brown | -0.670515214 | 1.84E-57    | 0.765680955  | 4.78E-84 |
| HOXA13    | brown | -0.168545665 | 0.000448096 | 0.234701698  | 8.58E-07 |
| MASP1     | brown | -0.426217818 | 2.09E-20    | 0.617994634  | 1.19E-46 |
| EPS8L2    | brown | 0.2306899    | 1.33E-06    | -0.489120408 | 3.02E-27 |
| PRMT1     | brown | 0.241569919  | 3.98E-07    | -0.468754167 | 7.11E-25 |
| COL4A4    | brown | -0.260764974 | 4.09E-08    | 0.551107002  | 1.58E-35 |
| S1PR5     | brown | 0.218197397  | 4.96E-06    | -0.355176803 | 3.13E-14 |
| TMEM60    | brown | 0.391238945  | 3.53E-17    | -0.40263391  | 3.45E-18 |
| TYRP1     | brown | -0.017994706 | 0.709825755 | 0.372733924  | 1.28E-15 |
| CCDC86    | brown | 0.237433666  | 6.34E-07    | -0.382703013 | 1.90E-16 |
| ARRB1     | brown | -0.143338725 | 0.002891146 | 0.303824952  | 1.24E-10 |
| ADRM1     | brown | 0.297288083  | 3.18E-10    | -0.536474153 | 2.04E-33 |
| MAS1L     | brown | -0.410952946 | 5.96E-19    | 0.737454054  | 5.87E-75 |
| PTRHD1    | brown | 0.213968865  | 7.61E-06    | -0.462845082 | 3.24E-24 |
| MITF      | brown | -0.334634245 | 1.04E-12    | 0.687307826  | 2.10E-61 |
| PPP1R35   | brown | 0.3442407    | 2.09E-13    | -0.532476921 | 7.40E-33 |
| TBC1D10B  | brown | 0.335572859  | 8.90E-13    | -0.406843029 | 1.43E-18 |
| C1orf53   | brown | 0.295956799  | 3.85E-10    | -0.407716674 | 1.19E-18 |
| ITIH3     | brown | -0.098945141 | 0.040283257 | 0.357194413  | 2.19E-14 |
| RORA      | brown | -0.253567003 | 9.81E-08    | 0.545971457  | 8.94E-35 |
| PCDHB3    | brown | -0.037199636 | 0.441650548 | 0.217025458  | 5.59E-06 |
| CLCN2     | brown | 0.347048747  | 1.29E-13    | -0.393290631 | 2.34E-17 |
| ALPK3     | brown | -0.164129123 | 0.000633745 | 0.427145285  | 1.69E-20 |
| MPV17L2   | brown | 0.261342712  | 3.81E-08    | -0.354099619 | 3.79E-14 |
| SMOC2     | brown | -0.393144022 | 2.41E-17    | 0.757753023  | 2.28E-81 |
| AP1S1     | brown | 0.369819359  | 2.20E-15    | -0.54480656  | 1.32E-34 |
| PCDH9     | brown | -0.241766303 | 3.89E-07    | 0.4206414    | 7.24E-20 |
| UNC119    | brown | 0.325421663  | 4.59E-12    | -0.422284397 | 5.03E-20 |
| HDAC8     | brown | 0.256654508  | 6.77E-08    | -0.320583287 | 9.83E-12 |
| PCK2      | brown | 0.307216399  | 7.51E-11    | -0.392132334 | 2.95E-17 |

|            |       |              |             |              |             |
|------------|-------|--------------|-------------|--------------|-------------|
| EFNA3      | brown | 0.231248898  | 1.25E-06    | -0.337443249 | 6.53E-13    |
| SPOP       | brown | -0.274510578 | 7.15E-09    | 0.514681917  | 1.86E-30    |
| MLIP       | brown | -0.247961643 | 1.90E-07    | 0.342179636  | 2.96E-13    |
| SLC25A23   | brown | -0.329897462 | 2.24E-12    | 0.449121018  | 9.82E-23    |
| FAM189A2   | brown | -0.456593856 | 1.56E-23    | 0.532261915  | 7.93E-33    |
| TUFM       | brown | 0.234766589  | 8.52E-07    | -0.464794603 | 1.97E-24    |
| CHRM2      | brown | -0.554731657 | 4.56E-36    | 0.847510922  | 8.32E-120   |
| LNP1       | brown | -0.161397072 | 0.000781948 | 0.334703798  | 1.03E-12    |
| C4orf3     | brown | -0.212569203 | 8.75E-06    | 0.201423139  | 2.58E-05    |
| EEPDI      | brown | -0.21306458  | 8.33E-06    | 0.399570409  | 6.50E-18    |
| ETV4       | brown | 0.300379117  | 2.04E-10    | -0.428184185 | 1.34E-20    |
| UBAC2      | brown | 0.316254328  | 1.92E-11    | -0.323194303 | 6.53E-12    |
| PRELP      | brown | -0.439977309 | 8.76E-22    | 0.790016286  | 5.58E-93    |
| PVRL1      | brown | 0.167168542  | 0.000499704 | -0.476462178 | 9.40E-26    |
| CD34       | brown | -0.412863911 | 3.95E-19    | 0.706432111  | 3.11E-66    |
| TMEM189    | brown | 0.244994811  | 2.69E-07    | -0.442769666 | 4.52E-22    |
| PRUNE2     | brown | -0.444127172 | 3.27E-22    | 0.880907938  | 3.93E-141   |
| CUTC       | brown | -0.26249302  | 3.30E-08    | 0.301343724  | 1.78E-10    |
| SCAF1      | brown | 0.259623541  | 4.71E-08    | -0.435471094 | 2.51E-21    |
| DTX2       | brown | 0.221531645  | 3.52E-06    | -0.431260653 | 6.64E-21    |
| C6orf136   | brown | 0.312993872  | 3.16E-11    | -0.576744242 | 1.73E-39    |
| BAIAP2L1   | brown | 0.294132694  | 4.98E-10    | -0.549975688 | 2.32E-35    |
| CDK7       | brown | 0.266933996  | 1.89E-08    | -0.408220715 | 1.07E-18    |
| ZNF454     | brown | -0.189361778 | 7.78E-05    | 0.438291964  | 1.30E-21    |
| DDA1       | brown | 0.201247183  | 2.62E-05    | -0.442872635 | 4.41E-22    |
| FREM3      | brown | -0.062797414 | 0.193708124 | 0.184754018  | 0.000116579 |
| MBOAT7     | brown | 0.292053947  | 6.67E-10    | -0.459189502 | 8.16E-24    |
| SHISA6     | brown | -0.387065172 | 8.09E-17    | 0.420858587  | 6.90E-20    |
| CPTP       | brown | 0.307134025  | 7.60E-11    | -0.55417445  | 5.52E-36    |
| FOLH1      | brown | 0.070028292  | 0.147144765 | 0.054347109  | 0.260794012 |
| CXorf36    | brown | -0.275339162 | 6.42E-09    | 0.635249471  | 5.70E-50    |
| EDEM2      | brown | 0.357818691  | 1.96E-14    | -0.372022466 | 1.46E-15    |
| ENPP6      | brown | -0.419682165 | 8.95E-20    | 0.387601956  | 7.28E-17    |
| DNAJC18    | brown | -0.339287124 | 4.80E-13    | 0.618184756  | 1.10E-46    |
| ENPP2      | brown | -0.219861376 | 4.18E-06    | 0.491143208  | 1.72E-27    |
| PPP1R12C   | brown | -0.211577424 | 9.65E-06    | 0.300156055  | 2.11E-10    |
| FAM47E-STB | brown | -0.18590245  | 0.000105498 | 0.258430236  | 5.45E-08    |
| PHYHIP     | brown | -0.451664542 | 5.28E-23    | 0.590566308  | 8.96E-42    |
| MAP1B      | brown | -0.39419296  | 1.95E-17    | 0.820149556  | 7.68E-106   |
| TMEM79     | brown | 0.152802227  | 0.001482777 | -0.403939902 | 2.63E-18    |
| PITX2      | brown | -0.269612551 | 1.35E-08    | 0.47802955   | 6.19E-26    |
| PROM2      | brown | 0.145630861  | 0.002468064 | -0.399124943 | 7.12E-18    |
| EPHA2      | brown | -0.041548506 | 0.390102553 | -0.208026641 | 1.37E-05    |
| KCNQ5      | brown | -0.219753126 | 4.23E-06    | 0.360958517  | 1.12E-14    |
| S100A14    | brown | 0.17502832   | 0.000265226 | -0.372288539 | 1.39E-15    |
| ZNF185     | brown | 0.062700063  | 0.194401227 | -0.231023585 | 1.28E-06    |
| PCDH19     | brown | -0.136704941 | 0.004513249 | 0.267743184  | 1.71E-08    |
| DENND2A    | brown | -0.359121743 | 1.55E-14    | 0.589916434  | 1.15E-41    |
| SNRPA1     | brown | 0.402166803  | 3.80E-18    | -0.590584984 | 8.89E-42    |
| UCKL1      | brown | 0.314682     | 2.44E-11    | -0.467828755 | 9.03E-25    |
| DDX49      | brown | 0.324464505  | 5.34E-12    | -0.478385316 | 5.63E-26    |

|           |       |              |             |              |             |
|-----------|-------|--------------|-------------|--------------|-------------|
| GNG5      | brown | 0.369488283  | 2.34E-15    | -0.50920934  | 9.56E-30    |
| CHCHD6    | brown | 0.225553958  | 2.31E-06    | -0.348918288 | 9.36E-14    |
| NAT9      | brown | 0.378357685  | 4.40E-16    | -0.465634112 | 1.59E-24    |
| REM1      | brown | -0.20713844  | 1.49E-05    | 0.472632924  | 2.58E-25    |
| CES1      | brown | -0.295534851 | 4.09E-10    | 0.458468658  | 9.78E-24    |
| GRIK5     | brown | -0.297537304 | 3.07E-10    | 0.544455767  | 1.48E-34    |
| IRX3      | brown | 0.058910802  | 0.222804927 | -0.196150267 | 4.21E-05    |
| PGR       | brown | -0.572606811 | 7.94E-39    | 0.551320453  | 1.47E-35    |
| HBA1      | brown | -0.08992059  | 0.062464957 | 0.16453642   | 0.000614027 |
| FGF7      | brown | -0.367480023 | 3.40E-15    | 0.771490349  | 4.45E-86    |
| KCNK3     | brown | -0.360252223 | 1.27E-14    | 0.619559197  | 6.09E-47    |
| RGN       | brown | -0.38091619  | 2.69E-16    | 0.628488837  | 1.21E-48    |
| DUSP1     | brown | -0.417751224 | 1.37E-19    | 0.510528929  | 6.46E-30    |
| TMEM147   | brown | 0.287255907  | 1.30E-09    | -0.366736029 | 3.90E-15    |
| ZNF628    | brown | 0.185306831  | 0.000111115 | -0.367312164 | 3.51E-15    |
| SLC02A1   | brown | -0.125335819 | 0.009275746 | 0.399141814  | 7.10E-18    |
| NIPSNAP3B | brown | -0.210597029 | 1.06E-05    | 0.440419708  | 7.89E-22    |
| TRPV4     | brown | 0.107223011  | 0.026191213 | -0.237670909 | 6.17E-07    |
| TFAP2C    | brown | 0.207705058  | 1.41E-05    | -0.333944679 | 1.16E-12    |
| FAM180B   | brown | -0.681727948 | 4.59E-60    | 0.732412117  | 1.86E-73    |
| PIDD1     | brown | 0.26296036   | 3.12E-08    | -0.366074996 | 4.40E-15    |
| PARM1     | brown | -0.295098676 | 4.35E-10    | 0.494707038  | 6.34E-28    |
| ACOT2     | brown | -0.07461993  | 0.122345714 | 0.326157724  | 4.09E-12    |
| LAMC3     | brown | -0.422804687 | 4.48E-20    | 0.470936707  | 4.03E-25    |
| TP53I3    | brown | 0.171937451  | 0.000341365 | -0.322320048 | 7.49E-12    |
| OPCML     | brown | -0.1497544   | 0.001846249 | 0.253553842  | 9.83E-08    |
| ACVRL1    | brown | -0.220252422 | 4.01E-06    | 0.543971098  | 1.74E-34    |
| BMX       | brown | -0.262371535 | 3.35E-08    | 0.391642032  | 3.26E-17    |
| CHTF18    | brown | 0.389363384  | 5.13E-17    | -0.533237319 | 5.80E-33    |
| SLC25A22  | brown | 0.327145128  | 3.49E-12    | -0.453848891 | 3.09E-23    |
| PPP1R1A   | brown | -0.35697796  | 2.28E-14    | 0.626930213  | 2.42E-48    |
| ABCB1     | brown | -0.381797453 | 2.27E-16    | 0.519076245  | 4.90E-31    |
| C19orf25  | brown | 0.295652389  | 4.02E-10    | -0.351091574 | 6.42E-14    |
| CLPTM1    | brown | 0.290858867  | 7.89E-10    | -0.411531267 | 5.26E-19    |
| PKNOX2    | brown | -0.258977342 | 5.10E-08    | 0.360991425  | 1.11E-14    |
| KCNK1     | brown | 0.086262572  | 0.073953014 | -0.264324677 | 2.63E-08    |
| ILK       | brown | -0.363820576 | 6.65E-15    | 0.729902651  | 1.01E-72    |
| KANK2     | brown | -0.404672237 | 2.25E-18    | 0.807447585  | 3.84E-100   |
| IGSF3     | brown | 0.184400905  | 0.000120201 | -0.333837412 | 1.18E-12    |
| SLC43A1   | brown | -0.201327448 | 2.60E-05    | 0.453054903  | 3.75E-23    |
| WDR24     | brown | 0.208834233  | 1.26E-05    | -0.288365165 | 1.11E-09    |
| RCAN1     | brown | -0.358701407 | 1.68E-14    | 0.604872867  | 2.94E-44    |
| MSRB3     | brown | -0.390827376 | 3.83E-17    | 0.844083319  | 6.53E-118   |
| SLC8B1    | brown | 0.238605149  | 5.56E-07    | -0.266334572 | 2.04E-08    |
| TMEM102   | brown | 0.263888115  | 2.78E-08    | -0.560231011 | 6.73E-37    |
| GNB5      | brown | -0.218609241 | 4.75E-06    | 0.259142356  | 5.00E-08    |
| NPM3      | brown | 0.234148836  | 9.12E-07    | -0.375535371 | 7.53E-16    |
| ELMO3     | brown | 0.216324846  | 6.00E-06    | -0.532352778 | 7.70E-33    |
| ARHGAP39  | brown | 0.394322753  | 1.90E-17    | -0.423111599 | 4.19E-20    |
| TMEM35    | brown | -0.372992479 | 1.22E-15    | 0.583827847  | 1.20E-40    |
| SNPH      | brown | -0.132461787 | 0.005942775 | 0.328933326  | 2.62E-12    |

|            |       |              |             |              |             |
|------------|-------|--------------|-------------|--------------|-------------|
| COA3       | brown | 0.20810585   | 1.36E-05    | -0.483581502 | 1.38E-26    |
| KLHL17     | brown | 0.277981418  | 4.53E-09    | -0.395000083 | 1.65E-17    |
| ZNF34      | brown | -0.124956731 | 0.009492476 | 0.242191596  | 3.71E-07    |
| DGUOK      | brown | 0.326986757  | 3.58E-12    | -0.531553408 | 9.94E-33    |
| GLRB       | brown | -0.071637047 | 0.138053344 | 0.299895726  | 2.19E-10    |
| ADRA1D     | brown | -0.443444225 | 3.85E-22    | 0.504845475  | 3.45E-29    |
| GPR56      | brown | 0.23212717   | 1.14E-06    | -0.406936132 | 1.40E-18    |
| SVIL       | brown | -0.331116268 | 1.84E-12    | 0.656411814  | 2.41E-54    |
| SMARCD3    | brown | -0.213289889 | 8.14E-06    | 0.382158878  | 2.11E-16    |
| GPD1       | brown | -0.095964757 | 0.046726925 | 0.320828399  | 9.46E-12    |
| KDR        | brown | -0.120127637 | 0.012673959 | 0.451973099  | 4.89E-23    |
| EFNA1      | brown | 0.266464575  | 2.01E-08    | -0.321057442 | 9.13E-12    |
| INHBB      | brown | -0.214910109 | 6.92E-06    | 0.37890959   | 3.96E-16    |
| LSM4       | brown | 0.399985571  | 5.97E-18    | -0.615127706 | 4.07E-46    |
| UBALD2     | brown | 0.360309108  | 1.26E-14    | -0.571198667 | 1.33E-38    |
| CKMT2      | brown | -0.389199391 | 5.30E-17    | 0.700659565  | 9.79E-65    |
| MRPL14     | brown | 0.315092712  | 2.29E-11    | -0.531467255 | 1.02E-32    |
| CCL16      | brown | -0.148298226 | 0.002047244 | 0.34624012   | 1.48E-13    |
| THSD7A     | brown | -0.154920086 | 0.001270253 | 0.478572377  | 5.35E-26    |
| CFAP58     | brown | -0.081117977 | 0.092962905 | 0.295905393  | 3.88E-10    |
| RAMP1      | brown | -0.293993867 | 5.08E-10    | 0.58377211   | 1.23E-40    |
| PSD        | brown | -0.467167614 | 1.07E-24    | 0.802758793  | 3.81E-98    |
| KCND3      | brown | -0.469744404 | 5.50E-25    | 0.608574744  | 6.39E-45    |
| NOV        | brown | -0.085125457 | 0.077856232 | 0.326225828  | 4.04E-12    |
| FILIP1     | brown | -0.542401914 | 2.93E-34    | 0.900557889  | 6.19E-157   |
| PYGL       | brown | 0.121425729  | 0.011737523 | -0.232381368 | 1.11E-06    |
| LIMK2      | brown | 0.225933142  | 2.22E-06    | -0.24031918  | 4.58E-07    |
| DNAJC7     | brown | 0.259651845  | 4.69E-08    | -0.434652094 | 3.04E-21    |
| RGCC       | brown | -0.247608928 | 1.98E-07    | 0.4009538    | 4.89E-18    |
| C11orf95   | brown | -0.187385877 | 9.26E-05    | 0.504430984  | 3.89E-29    |
| KLHL40     | brown | -0.370089979 | 2.10E-15    | 0.259776708  | 4.62E-08    |
| TERF2IP    | brown | -0.091483711 | 0.058026054 | 0.172390873  | 0.000329045 |
| PNMA2      | brown | -0.244025764 | 3.00E-07    | 0.511848585  | 4.36E-30    |
| PLAC9      | brown | -0.492935673 | 1.04E-27    | 0.609153509  | 5.02E-45    |
| THOC6      | brown | 0.268730481  | 1.51E-08    | -0.406061445 | 1.68E-18    |
| KIF13A     | brown | -0.227708985 | 1.83E-06    | 0.372918801  | 1.23E-15    |
| SDC1       | brown | 0.236903328  | 6.72E-07    | -0.532660596 | 6.98E-33    |
| RAET1G     | brown | 0.025136291  | 0.603201513 | -0.29060865  | 8.16E-10    |
| FAM110A    | brown | 0.395417319  | 1.52E-17    | -0.634878787 | 6.75E-50    |
| RADIL      | brown | -0.20863983  | 1.29E-05    | 0.379233892  | 3.72E-16    |
| RNF113A    | brown | 0.204731776  | 1.88E-05    | -0.396368753 | 1.25E-17    |
| CTTNBP2    | brown | -0.162922871 | 0.000695639 | 0.309109601  | 5.66E-11    |
| ZEB1       | brown | -0.392208505 | 2.91E-17    | 0.886340767  | 3.31E-145   |
| EGFLAM     | brown | -0.007750868 | 0.872676293 | 0.328884503  | 2.64E-12    |
| CAMK2A     | brown | -0.521986264 | 2.00E-31    | 0.781843158  | 7.50E-90    |
| GRIK3      | brown | -0.310256592 | 4.77E-11    | 0.381825687  | 2.25E-16    |
| TMX2-CTNND | brown | -0.128839034 | 0.007471951 | 0.268406757  | 1.57E-08    |
| CTAGE9     | brown | 0.098117308  | 0.041992906 | -0.208896013 | 1.26E-05    |
| STX10      | brown | 0.306720865  | 8.08E-11    | -0.479858403 | 3.79E-26    |
| CNKS3      | brown | -0.309089633 | 5.68E-11    | 0.375634176  | 7.39E-16    |
| COL4A3     | brown | -0.114248604 | 0.017789137 | 0.298437377  | 2.70E-10    |

|            |       |              |             |              |           |
|------------|-------|--------------|-------------|--------------|-----------|
| CNN1       | brown | -0.426697307 | 1.87E-20    | 0.754401564  | 2.88E-80  |
| LMX1A      | brown | -0.344666103 | 1.94E-13    | 0.326320289  | 3.98E-12  |
| ZNF788     | brown | -0.079947163 | 0.097793739 | 0.341483911  | 3.32E-13  |
| PRPH       | brown | -0.203567352 | 2.10E-05    | 0.387363618  | 7.63E-17  |
| C3orf18    | brown | -0.277075821 | 5.11E-09    | 0.565791458  | 9.37E-38  |
| SYNE1      | brown | -0.487667097 | 4.52E-27    | 0.827573066  | 2.20E-109 |
| PTGS1      | brown | -0.415332212 | 2.32E-19    | 0.721556569  | 2.44E-70  |
| NUDT19     | brown | 0.237309111  | 6.43E-07    | -0.286357764 | 1.47E-09  |
| PDGFD      | brown | -0.316142936 | 1.95E-11    | 0.540000374  | 6.47E-34  |
| FOXD3      | brown | -0.321683293 | 8.28E-12    | 0.485710122  | 7.74E-27  |
| C19orf33   | brown | 0.189453945  | 7.72E-05    | -0.461477791 | 4.58E-24  |
| RALY       | brown | 0.320999914  | 9.21E-12    | -0.448924423 | 1.03E-22  |
| SLC7A2     | brown | -0.116072037 | 0.016037579 | 0.284457854  | 1.90E-09  |
| CACNB4     | brown | -0.314420795 | 2.54E-11    | 0.548456836  | 3.88E-35  |
| GRASP      | brown | -0.355241683 | 3.10E-14    | 0.561865012  | 3.78E-37  |
| TUSC5      | brown | -0.189341674 | 7.79E-05    | 0.410957401  | 5.95E-19  |
| ADAMTS1    | brown | -0.481280122 | 2.58E-26    | 0.654520291  | 6.12E-54  |
| SNTB1      | brown | -0.078611162 | 0.103548062 | 0.376572415  | 6.19E-16  |
| CGNL1      | brown | -0.49765155  | 2.75E-28    | 0.757255572  | 3.33E-81  |
| CALCRL     | brown | -0.076010222 | 0.115517273 | 0.539500409  | 7.62E-34  |
| NFIC       | brown | -0.302891346 | 1.42E-10    | 0.557947286  | 1.50E-36  |
| KIF26A     | brown | -0.234209706 | 9.06E-07    | 0.432163629  | 5.40E-21  |
| TIGD5      | brown | 0.241156073  | 4.17E-07    | -0.360639503 | 1.18E-14  |
| SPINT2     | brown | 0.236352934  | 7.15E-07    | -0.422544999 | 4.75E-20  |
| TMEM9B     | brown | 0.121065894  | 0.011990775 | -0.256847975 | 6.61E-08  |
| STYXL1     | brown | 0.309678595  | 5.20E-11    | -0.462798951 | 3.28E-24  |
| GREM2      | brown | -0.500303123 | 1.29E-28    | 0.584007718  | 1.12E-40  |
| RNF122     | brown | -0.353997872 | 3.86E-14    | 0.535289238  | 3.00E-33  |
| GPR124     | brown | -0.354591671 | 3.48E-14    | 0.807398703  | 4.03E-100 |
| PFKFB4     | brown | 0.328343502  | 2.88E-12    | -0.353119822 | 4.50E-14  |
| ZNF385D    | brown | -0.214399742 | 7.28E-06    | 0.530943961  | 1.21E-32  |
| PTGER3     | brown | -0.265453486 | 2.28E-08    | 0.689720759  | 5.42E-62  |
| KCNB1      | brown | -0.570136662 | 1.96E-38    | 0.827073597  | 3.86E-109 |
| HPD        | brown | -0.283784118 | 2.08E-09    | 0.534192809  | 4.27E-33  |
| C8orf4     | brown | -0.250933729 | 1.34E-07    | 0.219772803  | 4.22E-06  |
| EMCN       | brown | -0.370666706 | 1.88E-15    | 0.667026127  | 1.13E-56  |
| TIGD1      | brown | 0.216273825  | 6.03E-06    | -0.266995353 | 1.88E-08  |
| THEM5      | brown | 0.107855966  | 0.025314684 | -0.292286448 | 6.46E-10  |
| FP325317.1 | brown | -0.259159224 | 4.99E-08    | 0.536104592  | 2.30E-33  |
| TNNI3K     | brown | -0.219672242 | 4.26E-06    | 0.295442022  | 4.14E-10  |
| AKAP13     | brown | -0.286905626 | 1.36E-09    | 0.646319721  | 3.24E-52  |
| LPIN1      | brown | -0.157217523 | 0.001071655 | 0.441213485  | 6.54E-22  |
| ABCA9      | brown | -0.285280814 | 1.70E-09    | 0.4402486    | 8.22E-22  |
| NRG2       | brown | -0.293299526 | 5.60E-10    | 0.28950129   | 9.52E-10  |
| TSHZ2      | brown | -0.2447004   | 2.78E-07    | 0.396152882  | 1.31E-17  |
| RBM10      | brown | 0.186983376  | 9.60E-05    | -0.317780509 | 1.52E-11  |
| HDAC5      | brown | -0.249844889 | 1.53E-07    | 0.330015345  | 2.20E-12  |
| CRTC3      | brown | -0.251972006 | 1.19E-07    | 0.60903765   | 5.27E-45  |
| ASMTL      | brown | -0.129739036 | 0.007062366 | 0.242338896  | 3.64E-07  |
| PDZRN4     | brown | -0.538377461 | 1.10E-33    | 0.820372874  | 6.04E-106 |
| ANKRD53    | brown | -0.297453847 | 3.11E-10    | 0.506859086  | 1.91E-29  |

|         |       |              |             |              |             |
|---------|-------|--------------|-------------|--------------|-------------|
| USP43   | brown | 0.225137034  | 2.41E-06    | -0.324176534 | 5.59E-12    |
| DDX54   | brown | 0.27677693   | 5.31E-09    | -0.412974877 | 3.86E-19    |
| EIF5A   | brown | 0.248492156  | 1.79E-07    | -0.482171457 | 2.03E-26    |
| STARD3  | brown | 0.266654891  | 1.96E-08    | -0.34452083  | 1.99E-13    |
| USP20   | brown | -0.165719496 | 0.000559931 | 0.250803387  | 1.36E-07    |
| GALE    | brown | 0.30638027   | 8.50E-11    | -0.587336406 | 3.13E-41    |
| AP4S1   | brown | -0.122582519 | 0.010955112 | 0.330746954  | 1.96E-12    |
| DCT     | brown | -0.286078463 | 1.52E-09    | 0.465565161  | 1.62E-24    |
| MPP2    | brown | -0.183639277 | 0.000128374 | 0.336592748  | 7.52E-13    |
| HDC     | brown | -0.352208915 | 5.28E-14    | 0.673577225  | 3.68E-58    |
| HSD17B6 | brown | -0.384684634 | 1.29E-16    | 0.715143167  | 1.45E-68    |
| PTPRD   | brown | -0.275061254 | 6.65E-09    | 0.537111805  | 1.66E-33    |
| ST8SIA1 | brown | -0.324246784 | 5.53E-12    | 0.526378782  | 5.11E-32    |
| PECAM1  | brown | -0.222778071 | 3.09E-06    | 0.609833021  | 3.78E-45    |
| KLF17   | brown | -0.404236731 | 2.47E-18    | 0.75972526   | 5.03E-82    |
| MYLK    | brown | -0.444823922 | 2.77E-22    | 0.867395423  | 8.31E-132   |
| SRRT    | brown | 0.268342811  | 1.58E-08    | -0.498432132 | 2.20E-28    |
| CRLF2   | brown | -0.316624965 | 1.81E-11    | 0.399612172  | 6.45E-18    |
| CNNM1   | brown | -0.285206375 | 1.72E-09    | 0.381210246  | 2.54E-16    |
| KANK3   | brown | -0.239894598 | 4.81E-07    | 0.453202416  | 3.62E-23    |
| PLCL1   | brown | -0.427561528 | 1.54E-20    | 0.787528036  | 5.17E-92    |
| ATP6AP1 | brown | 0.303224223  | 1.35E-10    | -0.395988052 | 1.35E-17    |
| ARHGEF9 | brown | -0.315896646 | 2.03E-11    | 0.496279833  | 4.06E-28    |
| AQP2    | brown | -0.138006462 | 0.004141686 | 0.218746475  | 4.69E-06    |
| PLA2G5  | brown | -0.346499824 | 1.42E-13    | 0.775447464  | 1.70E-87    |
| DNAJB4  | brown | -0.365008695 | 5.35E-15    | 0.608116895  | 7.72E-45    |
| ZNF671  | brown | -0.186157527 | 0.000103175 | 0.411396352  | 5.42E-19    |
| KDELR1  | brown | 0.378614852  | 4.19E-16    | -0.427963817 | 1.41E-20    |
| PAMR1   | brown | -0.493186141 | 9.72E-28    | 0.633694828  | 1.16E-49    |
| PRDM16  | brown | -0.130198316 | 0.006861191 | 0.194722635  | 4.80E-05    |
| TARS2   | brown | 0.298234688  | 2.78E-10    | -0.399369769 | 6.78E-18    |
| C4A     | brown | -0.199590653 | 3.06E-05    | 0.63156327   | 3.04E-49    |
| KCND1   | brown | -0.036849485 | 0.445963452 | 0.245282009  | 2.60E-07    |
| GEMIN7  | brown | 0.351544782  | 5.93E-14    | -0.556583155 | 2.40E-36    |
| STEAP3  | brown | 0.244153054  | 2.96E-07    | -0.390310798 | 4.25E-17    |
| EMID1   | brown | -0.069341547 | 0.151161856 | 0.128302256  | 0.007726221 |
| PLVAP   | brown | -0.07662808  | 0.112580149 | 0.35110518   | 6.40E-14    |
| ABCA8   | brown | -0.550445285 | 1.98E-35    | 0.661627149  | 1.77E-55    |
| HGF     | brown | -0.211926133 | 9.33E-06    | 0.593121945  | 3.29E-42    |
| PGM5    | brown | -0.535286061 | 3.00E-33    | 0.826188559  | 1.04E-108   |
| ALG14   | brown | 0.158507502  | 0.000973109 | -0.23611549  | 7.34E-07    |
| GEM     | brown | -0.416285459 | 1.88E-19    | 0.795336263  | 4.31E-95    |
| ROB04   | brown | -0.150807067 | 0.001712383 | 0.459958135  | 6.73E-24    |
| KCNN2   | brown | -0.272328289 | 9.49E-09    | 0.492886226  | 1.06E-27    |
| SMPDL3B | brown | 0.183728783  | 0.000127387 | -0.24256303  | 3.55E-07    |
| ZNF516  | brown | -0.266121493 | 2.10E-08    | 0.393101457  | 2.43E-17    |
| ERC1    | brown | -0.242657556 | 3.51E-07    | 0.52785691   | 3.21E-32    |
| PIGU    | brown | 0.316431379  | 1.87E-11    | -0.443726497 | 3.60E-22    |
| ACTG2   | brown | -0.397140948 | 1.07E-17    | 0.715229352  | 1.37E-68    |
| RAB38   | brown | 0.074772236  | 0.121582668 | -0.232439143 | 1.10E-06    |
| PLEKHJ1 | brown | 0.316220431  | 1.93E-11    | -0.440305717 | 8.11E-22    |



|          |       |              |             |              |           |
|----------|-------|--------------|-------------|--------------|-----------|
| TXLNB    | brown | -0.322335719 | 7.47E-12    | 0.625233405  | 5.12E-48  |
| GSTM5    | brown | -0.375383971 | 7.75E-16    | 0.390480323  | 4.11E-17  |
| LRRC4B   | brown | -0.351599821 | 5.87E-14    | 0.471180288  | 3.78E-25  |
| TCEAL3   | brown | -0.235545983 | 7.82E-07    | 0.405041766  | 2.08E-18  |
| DMD      | brown | -0.464817659 | 1.96E-24    | 0.78503005   | 4.69E-91  |
| PDE1B    | brown | -0.099402307 | 0.039364586 | 0.315842892  | 2.05E-11  |
| LRRC3B   | brown | -0.601844772 | 1.01E-43    | 0.409025764  | 8.99E-19  |
| NPR1     | brown | -0.344297024 | 2.07E-13    | 0.622844475  | 1.46E-47  |
| TMEM47   | brown | -0.165868099 | 0.000553458 | 0.297483977  | 3.10E-10  |
| CAPN1    | brown | 0.200696778  | 2.76E-05    | -0.495223195 | 5.48E-28  |
| RBPMS2   | brown | -0.402323663 | 3.68E-18    | 0.779004758  | 8.50E-89  |
| SLC9A9   | brown | -0.380053046 | 3.18E-16    | 0.610712239  | 2.62E-45  |
| ADAT3    | brown | 0.220018101  | 4.11E-06    | -0.366883367 | 3.80E-15  |
| HPGDS    | brown | -0.388266673 | 6.38E-17    | 0.663251469  | 7.79E-56  |
| SLC25A12 | brown | -0.233379225 | 9.93E-07    | 0.340383688  | 4.00E-13  |
| MRPS22   | brown | 0.173252126  | 0.000306779 | -0.356763227 | 2.37E-14  |
| LEP      | brown | -0.075339717 | 0.118772231 | 0.208522884  | 1.30E-05  |
| RD3L     | brown | -0.499626606 | 1.56E-28    | 0.262572199  | 3.27E-08  |
| PREX2    | brown | -0.350949443 | 6.58E-14    | 0.608152228  | 7.61E-45  |
| CMA1     | brown | -0.407425397 | 1.26E-18    | 0.773883454  | 6.22E-87  |
| FBLN1    | brown | -0.176750226 | 0.000230014 | 0.204838994  | 1.86E-05  |
| UGP2     | brown | -0.188423992 | 8.45E-05    | 0.313398926  | 2.97E-11  |
| HN1      | brown | 0.450576138  | 6.89E-23    | -0.603795704 | 4.57E-44  |
| DUSP3    | brown | -0.274568    | 7.10E-09    | 0.545908521  | 9.13E-35  |
| TPRKB    | brown | 0.263824423  | 2.80E-08    | -0.429025553 | 1.11E-20  |
| GNAL     | brown | -0.484670757 | 1.03E-26    | 0.706376671  | 3.21E-66  |
| STAT5B   | brown | -0.328407674 | 2.85E-12    | 0.595239774  | 1.43E-42  |
| PCDH17   | brown | 8.36E-05     | 0.998621513 | 0.360324721  | 1.25E-14  |
| DLC1     | brown | -0.29879729  | 2.57E-10    | 0.568304989  | 3.80E-38  |
| CLEC3A   | brown | -0.431678139 | 6.03E-21    | 0.623969948  | 8.92E-48  |
| CILP     | brown | -0.341030745 | 3.59E-13    | 0.709015904  | 6.46E-67  |
| PDZD11   | brown | 0.215546392  | 6.49E-06    | -0.374475079 | 9.21E-16  |
| THAP8    | brown | -0.03921233  | 0.417325894 | 0.235911863  | 7.51E-07  |
| KPTN     | brown | 0.296392087  | 3.62E-10    | -0.426989647 | 1.75E-20  |
| PACSIN3  | brown | 0.17192251   | 0.000341778 | -0.322807503 | 6.94E-12  |
| LURAP1   | brown | -0.3036341   | 1.27E-10    | 0.426875114  | 1.80E-20  |
| IMP4     | brown | 0.248779592  | 1.73E-07    | -0.389238068 | 5.26E-17  |
| C14orf28 | brown | -0.262921773 | 3.13E-08    | 0.468186442  | 8.24E-25  |
| PELI2    | brown | -0.405944393 | 1.72E-18    | 0.610484708  | 2.88E-45  |
| AKAP12   | brown | -0.357835213 | 1.96E-14    | 0.599989354  | 2.14E-43  |
| AXIN2    | brown | -0.137860323 | 0.004181981 | 0.38428301   | 1.40E-16  |
| GSN      | brown | -0.424877358 | 2.82E-20    | 0.619046592  | 7.60E-47  |
| CPXM2    | brown | -0.319526508 | 1.16E-11    | 0.765006396  | 8.15E-84  |
| TMX4     | brown | -0.289518887 | 9.50E-10    | 0.509397512  | 9.04E-30  |
| BCO2     | brown | -0.273689758 | 7.96E-09    | 0.235127753  | 8.19E-07  |
| RAB9B    | brown | -0.464484801 | 2.13E-24    | 0.764546029  | 1.17E-83  |
| TRPC4    | brown | -0.295048072 | 4.38E-10    | 0.699095045  | 2.46E-64  |
| AOX1     | brown | -0.518385857 | 6.05E-31    | 0.822802883  | 4.35E-107 |
| FAM57A   | brown | 0.081193487  | 0.092658019 | -0.225708176 | 2.27E-06  |
| AVPR2    | brown | -0.289570037 | 9.43E-10    | 0.460907345  | 5.30E-24  |
| CASQ2    | brown | -0.460974605 | 5.21E-24    | 0.818273134  | 5.69E-105 |

|          |       |              |             |              |             |
|----------|-------|--------------|-------------|--------------|-------------|
| 2-Mar    | brown | -0.162935249 | 0.000694977 | 0.381865912  | 2.24E-16    |
| ESYT2    | brown | -0.181985924 | 0.000147948 | 0.419544314  | 9.23E-20    |
| DHRS1    | brown | 0.051793713  | 0.283895089 | -0.3245554   | 5.27E-12    |
| CFAP221  | brown | 0.059187903  | 0.220632552 | 0.166450404  | 0.000528757 |
| CASP14   | brown | 0.149763263  | 0.001845083 | -0.234403863 | 8.87E-07    |
| EBF1     | brown | -0.438721011 | 1.18E-21    | 0.846205132  | 4.44E-119   |
| ADAMTSL2 | brown | -0.051041902 | 0.29095226  | 0.160039553  | 0.000866958 |
| CALM1    | brown | -0.164071231 | 0.000636595 | 0.283212524  | 2.25E-09    |
| TECR     | brown | 0.24651768   | 2.25E-07    | -0.550826839 | 1.74E-35    |
| MROH6    | brown | 0.211206267  | 1.00E-05    | -0.255245997 | 8.02E-08    |
| ACAN     | brown | 0.107430854  | 0.025900549 | 0.194410664  | 4.94E-05    |
| OXER1    | brown | -0.348094548 | 1.08E-13    | 0.380173475  | 3.10E-16    |
| PCSK7    | brown | -0.396221503 | 1.29E-17    | 0.767348561  | 1.27E-84    |
| ACTN3    | brown | -0.176605366 | 0.000232799 | 0.30878305   | 5.95E-11    |
| FHL1     | brown | -0.470029594 | 5.10E-25    | 0.854596803  | 7.08E-124   |
| PEX14    | brown | -0.229629689 | 1.49E-06    | 0.123279936  | 0.010506044 |
| CHRD1    | brown | -0.454882402 | 2.39E-23    | 0.728781197  | 2.13E-72    |
| ENDOG    | brown | 0.121115267  | 0.011955743 | -0.36848919  | 2.82E-15    |
| FAT4     | brown | -0.400575289 | 5.28E-18    | 0.841164202  | 2.47E-116   |
| WWC1     | brown | 0.21781391   | 5.15E-06    | -0.269243848 | 1.41E-08    |
| GPM6B    | brown | -0.336106212 | 8.15E-13    | 0.552635548  | 9.37E-36    |
| WDR17    | brown | -0.205210399 | 1.80E-05    | 0.332363834  | 1.50E-12    |
| TRAF5    | brown | -0.120840644 | 0.012151751 | 0.362337316  | 8.71E-15    |
| CDIP1    | brown | -0.255099696 | 8.16E-08    | 0.348288729  | 1.04E-13    |
| ENPP3    | brown | -0.262449902 | 3.32E-08    | 0.485061188  | 9.25E-27    |
| RHOV     | brown | 0.183817756  | 0.000126413 | -0.409287475 | 8.50E-19    |
| C11orf80 | brown | 0.265827323  | 2.18E-08    | -0.309482409 | 5.36E-11    |
| TACC2    | brown | -0.384091758 | 1.45E-16    | 0.418668612  | 1.12E-19    |
| IL13     | brown | -0.299771816 | 2.23E-10    | 0.360204052  | 1.28E-14    |
| KRT18    | brown | 0.331288376  | 1.79E-12    | -0.48242581  | 1.90E-26    |
| TACR1    | brown | -0.406596635 | 1.50E-18    | 0.611302088  | 2.05E-45    |
| HABP4    | brown | -0.300446771 | 2.02E-10    | 0.604334799  | 3.67E-44    |
| TMEM258  | brown | 0.335050147  | 9.69E-13    | -0.481608932 | 2.36E-26    |
| PDE4D    | brown | -0.426767928 | 1.84E-20    | 0.60523322   | 2.54E-44    |
| RNF180   | brown | -0.485687792 | 7.79E-27    | 0.735632591  | 2.06E-74    |
| DOK6     | brown | -0.460657721 | 5.64E-24    | 0.754781624  | 2.17E-80    |
| PRSS8    | brown | 0.274354423  | 7.30E-09    | -0.310932018 | 4.31E-11    |
| MEGF8    | brown | -0.131827923 | 0.00618814  | 0.291055981  | 7.67E-10    |
| CSRNP1   | brown | -0.490086352 | 2.31E-27    | 0.550036555  | 2.27E-35    |
| MRPL27   | brown | 0.294037678  | 5.05E-10    | -0.519989767 | 3.71E-31    |
| DUS3L    | brown | 0.165467573  | 0.000571065 | -0.327844578 | 3.12E-12    |
| SRL      | brown | -0.538118854 | 1.20E-33    | 0.780909201  | 1.67E-89    |
| LEPR     | brown | -0.423526312 | 3.82E-20    | 0.596258864  | 9.53E-43    |
| CPQ      | brown | -0.278167427 | 4.42E-09    | 0.542682275  | 2.67E-34    |
| GPIHBP1  | brown | -0.482402376 | 1.91E-26    | 0.687419349  | 1.97E-61    |
| AGMAT    | brown | 0.231927037  | 1.16E-06    | -0.347847922 | 1.13E-13    |
| UTRN     | brown | -0.282787492 | 2.38E-09    | 0.603751548  | 4.65E-44    |
| KIAA1377 | brown | -0.270664408 | 1.18E-08    | 0.420921132  | 6.81E-20    |
| PLA2G2A  | brown | -0.200906844 | 2.71E-05    | 0.399019717  | 7.28E-18    |
| LRFN5    | brown | -0.47586836  | 1.10E-25    | 0.718282455  | 1.99E-69    |
| KCNMA1   | brown | -0.498116369 | 2.41E-28    | 0.84495863   | 2.17E-118   |

|            |       |              |             |              |             |
|------------|-------|--------------|-------------|--------------|-------------|
| OAS1       | brown | 0.2010952    | 2.66E-05    | -0.375692917 | 7.31E-16    |
| KCP        | brown | 0.153660115  | 0.001393035 | -0.204403349 | 1.94E-05    |
| C7         | brown | -0.482237177 | 1.99E-26    | 0.76298798   | 3.99E-83    |
| EBF2       | brown | -0.404614981 | 2.28E-18    | 0.760984644  | 1.90E-82    |
| TMEM233    | brown | -0.224549353 | 2.56E-06    | 0.404605872  | 2.28E-18    |
| TMEM229A   | brown | -0.294149487 | 4.97E-10    | 0.532565845  | 7.19E-33    |
| ZMAT3      | brown | -0.13339043  | 0.005599066 | 0.434172993  | 3.40E-21    |
| SSBP2      | brown | -0.317302571 | 1.63E-11    | 0.496903474  | 3.40E-28    |
| LDB3       | brown | -0.450213532 | 7.53E-23    | 0.658491104  | 8.57E-55    |
| ITGB4      | brown | 0.16695298   | 0.000508265 | -0.396641945 | 1.18E-17    |
| UBE2J2     | brown | 0.27769044   | 4.71E-09    | -0.472795879 | 2.48E-25    |
| NR4A3      | brown | -0.540725442 | 5.10E-34    | 0.61346379   | 8.24E-46    |
| LAMA2      | brown | -0.418542871 | 1.15E-19    | 0.798340315  | 2.60E-96    |
| CMTM5      | brown | -0.693333227 | 6.94E-63    | 0.719385558  | 9.85E-70    |
| PTGFR      | brown | -0.492896365 | 1.05E-27    | 0.838526309  | 6.20E-115   |
| MYOT       | brown | -0.489654738 | 2.61E-27    | 0.604131179  | 3.98E-44    |
| TMED9      | brown | 0.28892852   | 1.03E-09    | -0.296798912 | 3.41E-10    |
| GPRASP1    | brown | -0.50667391  | 2.02E-29    | 0.819158803  | 2.22E-105   |
| CEP85L     | brown | -0.410793529 | 6.16E-19    | 0.593676533  | 2.65E-42    |
| HOXB7      | brown | 0.283493113  | 2.17E-09    | -0.441311521 | 6.39E-22    |
| SLC8A1     | brown | -0.388730252 | 5.82E-17    | 0.737679478  | 5.02E-75    |
| PAK3       | brown | -0.058247513 | 0.228066734 | 0.200104395  | 2.92E-05    |
| ANG        | brown | -0.211142558 | 1.01E-05    | 0.278746577  | 4.09E-09    |
| PHYHD1     | brown | -0.266276527 | 2.06E-08    | 0.394946894  | 1.67E-17    |
| PARD3B     | brown | -0.413774491 | 3.25E-19    | 0.729013156  | 1.83E-72    |
| TUB        | brown | -0.33648516  | 7.65E-13    | 0.61191893   | 1.58E-45    |
| HSF1       | brown | 0.206280431  | 1.62E-05    | -0.345141774 | 1.79E-13    |
| NKIRAS1    | brown | -0.132098068 | 0.006082478 | 0.342902952  | 2.62E-13    |
| BOLA3      | brown | 0.327309292  | 3.40E-12    | -0.459700214 | 7.18E-24    |
| PDXK       | brown | 0.321511218  | 8.51E-12    | -0.330601791 | 2.00E-12    |
| AAAS       | brown | 0.294282866  | 4.88E-10    | -0.369019766 | 2.56E-15    |
| TMEM256-PL | brown | 0.162749147  | 0.000705001 | -0.288449231 | 1.10E-09    |
| PIP5K1C    | brown | -0.277139417 | 5.06E-09    | 0.490694786  | 1.95E-27    |
| SELE       | brown | -0.295161562 | 4.31E-10    | 0.458950303  | 8.67E-24    |
| DCXR       | brown | 0.238378551  | 5.70E-07    | -0.446030446 | 2.07E-22    |
| FAM107A    | brown | -0.626159552 | 3.40E-48    | 0.718595761  | 1.63E-69    |
| EBPL       | brown | 0.13362516   | 0.005515067 | -0.276215465 | 5.72E-09    |
| SLC40A1    | brown | -0.131881958 | 0.006166875 | 0.352275659  | 5.22E-14    |
| IL33       | brown | -0.280230925 | 3.36E-09    | 0.471409723  | 3.56E-25    |
| ANKRD16    | brown | 0.198395538  | 3.42E-05    | -0.279823822 | 3.55E-09    |
| MAOB       | brown | -0.40694448  | 1.40E-18    | 0.680874918  | 7.31E-60    |
| MKX        | brown | -0.374980414 | 8.37E-16    | 0.729989075  | 9.52E-73    |
| BAG2       | brown | -0.369572182 | 2.31E-15    | 0.698454002  | 3.58E-64    |
| PISD       | brown | 0.202914934  | 2.24E-05    | -0.250720674 | 1.38E-07    |
| TP53I11    | brown | -0.049498703 | 0.305803635 | 0.168679476  | 0.000443356 |
| ZCCHC24    | brown | -0.408199599 | 1.07E-18    | 0.812136555  | 3.40E-102   |
| BCL2       | brown | -0.33420244  | 1.11E-12    | 0.536593352  | 1.97E-33    |
| ZBTB47     | brown | -0.326590303 | 3.81E-12    | 0.593164456  | 3.24E-42    |
| RUNX1T1    | brown | -0.402213159 | 3.76E-18    | 0.831308491  | 3.12E-111   |
| CACNA1G    | brown | -0.002116107 | 0.965101408 | 0.157870816  | 0.001020652 |
| CPE        | brown | -0.205534144 | 1.74E-05    | 0.376781665  | 5.94E-16    |

|            |       |              |             |              |            |
|------------|-------|--------------|-------------|--------------|------------|
| TLL7       | brown | -0.343127268 | 2.52E-13    | 0.555284095  | 3.77E-36   |
| TCEAL2     | brown | -0.459664061 | 7.24E-24    | 0.730690406  | 5.95E-73   |
| FAM155A    | brown | -0.220254723 | 4.01E-06    | 0.333295826  | 1.29E-12   |
| CAPN15     | brown | 0.254138     | 9.17E-08    | -0.43710398  | 1.72E-21   |
| BRAT1      | brown | 0.262805129  | 3.18E-08    | -0.397323897 | 1.03E-17   |
| ZFYVE27    | brown | 0.198152256  | 3.50E-05    | -0.296251131 | 3.69E-10   |
| RAC1       | brown | 0.172933573  | 0.000314846 | -0.357478383 | 2.08E-14   |
| ESAM       | brown | -0.095167067 | 0.048591345 | 0.379068472  | 3.84E-16   |
| OR2C1      | brown | -0.10128629  | 0.035763548 | 0.226962192  | 1.99E-06   |
| FHL5       | brown | -0.382631404 | 1.93E-16    | 0.692116089  | 1.39E-62   |
| TMEM220    | brown | -0.457061203 | 1.39E-23    | 0.672049968  | 8.23E-58   |
| SNRK       | brown | -0.30901532  | 5.75E-11    | 0.575523984  | 2.71E-39   |
| INPP5A     | brown | -0.318566349 | 1.34E-11    | 0.459932922  | 6.77E-24   |
| TBC1D1     | brown | -0.16027047  | 0.00085192  | 0.339297358  | 4.80E-13   |
| HSPB3      | brown | -0.19819473  | 3.49E-05    | 0.367209156  | 3.57E-15   |
| LDB2       | brown | -0.34475035  | 1.91E-13    | 0.704393035  | 1.06E-65   |
| ZDHHC24    | brown | 0.361793299  | 9.61E-15    | -0.425515268 | 2.44E-20   |
| ESR1       | brown | -0.310968781 | 4.29E-11    | 0.233318757  | 9.99E-07   |
| MTG2       | brown | 0.331738154  | 1.67E-12    | -0.383727999 | 1.56E-16   |
| THEGL      | brown | -0.152149418 | 0.00155459  | 0.356876569  | 2.32E-14   |
| DMGDH      | brown | -0.600549255 | 1.71E-43    | 0.807998044  | 2.22E-100  |
| NCALD      | brown | -0.3808374   | 2.73E-16    | 0.666996443  | 1.14E-56   |
| KLF12      | brown | -0.197503144 | 3.72E-05    | 0.504847042  | 3.45E-29   |
| RXRG       | brown | -0.506607055 | 2.06E-29    | 0.569946706  | 2.10E-38   |
| TARBP2     | brown | 0.414942313  | 2.52E-19    | -0.573906365 | 4.93E-39   |
| SSBP1      | brown | 0.252429914  | 1.12E-07    | -0.48167996  | 2.32E-26   |
| FUCA2      | brown | 0.254772251  | 8.49E-08    | -0.265061323 | 2.40E-08   |
| FAM110D    | brown | -0.356638121 | 2.42E-14    | 0.523317617  | 1.33E-31   |
| TOMM34     | brown | 0.283910595  | 2.05E-09    | -0.340222233 | 4.11E-13   |
| MPRIP      | brown | -0.129828412 | 0.007022808 | 0.253192819  | 1.03E-07   |
| RAD51L3-RF | brown | -0.116055992 | 0.016052308 | 0.186306541  | 0.00010184 |
| WWTR1      | brown | -0.351575162 | 5.90E-14    | 0.732241361  | 2.09E-73   |
| HHIP       | brown | -0.341340841 | 3.41E-13    | 0.294120446  | 4.99E-10   |
| PTP4A3     | brown | -0.077191582 | 0.109952872 | 0.394203782  | 1.94E-17   |
| STARD13    | brown | -0.371686174 | 1.56E-15    | 0.770771113  | 7.99E-86   |
| PSMA4      | brown | 0.292917447  | 5.91E-10    | -0.482120979 | 2.06E-26   |
| MYOCD      | brown | -0.597403658 | 6.04E-43    | 0.840448848  | 5.96E-116  |
| SLIT2      | brown | -0.448169608 | 1.24E-22    | 0.819507674  | 1.53E-105  |
| CHCHD1     | brown | 0.329875542  | 2.25E-12    | -0.509989055 | 7.59E-30   |
| THOC3      | brown | 0.271576091  | 1.05E-08    | -0.481449413 | 2.47E-26   |
| SV2B       | brown | -0.064452693 | 0.182198475 | 0.304635365  | 1.10E-10   |
| MEOX1      | brown | -0.379260788 | 3.70E-16    | 0.607495457  | 9.99E-45   |
| WNT9A      | brown | -0.247239175 | 2.07E-07    | 0.262374469  | 3.35E-08   |
| THRSP      | brown | -0.077516274 | 0.108461094 | 0.244529476  | 2.84E-07   |
| C11orf98   | brown | 0.275728058  | 6.10E-09    | -0.493867894 | 8.03E-28   |
| CCDC3      | brown | -0.267415294 | 1.78E-08    | 0.518963126  | 5.07E-31   |
| NPRL3      | brown | 0.248085387  | 1.88E-07    | -0.35016007  | 7.55E-14   |
| TSPAN18    | brown | -0.3696386   | 2.28E-15    | 0.753812788  | 4.48E-80   |
| RAI2       | brown | -0.458094239 | 1.07E-23    | 0.706051894  | 3.91E-66   |
| KIAA2013   | brown | 0.248143078  | 1.86E-07    | -0.360114661 | 1.30E-14   |
| ANKRD34A   | brown | -0.05560495  | 0.249903928 | 0.304847161  | 1.07E-10   |

|          |       |              |             |              |             |
|----------|-------|--------------|-------------|--------------|-------------|
| ZNF135   | brown | -0.155559236 | 0.00121185  | 0.285148364  | 1.73E-09    |
| SLC39A11 | brown | 0.329424832  | 2.42E-12    | -0.363560929 | 6.97E-15    |
| TIAM2    | brown | -0.200520468 | 2.81E-05    | 0.478948663  | 4.84E-26    |
| FLT1     | brown | -0.041983733 | 0.385152413 | 0.260356395  | 4.30E-08    |
| SHROOM3  | brown | -0.142760237 | 0.003007867 | 0.288792939  | 1.05E-09    |
| AARD     | brown | -0.454204878 | 2.83E-23    | 0.750681027  | 4.59E-79    |
| VARS2    | brown | 0.244401146  | 2.88E-07    | -0.333709109 | 1.21E-12    |
| DPCD     | brown | 0.230670132  | 1.33E-06    | -0.372097797 | 1.44E-15    |
| CCDC176  | brown | -0.085291219 | 0.077277047 | 0.379687418  | 3.41E-16    |
| TMEM179B | brown | 0.279590659  | 3.66E-09    | -0.406836227 | 1.43E-18    |
| CDC42EP3 | brown | -0.252152257 | 1.16E-07    | 0.534090193  | 4.41E-33    |
| SGCD     | brown | -0.414921613 | 2.53E-19    | 0.821291771  | 2.24E-106   |
| CBX4     | brown | 0.246208437  | 2.34E-07    | -0.290330449 | 8.49E-10    |
| NT5C3A   | brown | 0.247071506  | 2.11E-07    | -0.370271954 | 2.03E-15    |
| RBMX2    | brown | 0.123818267  | 0.01017065  | -0.284584708 | 1.87E-09    |
| BLOC1S3  | brown | 0.384952956  | 1.23E-16    | -0.380861564 | 2.72E-16    |
| HSPA12B  | brown | -0.241776568 | 3.89E-07    | 0.671722346  | 9.78E-58    |
| CST11    | brown | -0.065916725 | 0.172446828 | 0.194069906  | 5.10E-05    |
| NKAPL    | brown | -0.569311095 | 2.64E-38    | 0.803703897  | 1.52E-98    |
| PTPN21   | brown | -0.219496431 | 4.34E-06    | 0.498412361  | 2.21E-28    |
| HIF3A    | brown | -0.42612373  | 2.13E-20    | 0.620158755  | 4.70E-47    |
| SBDS     | brown | -0.332302068 | 1.52E-12    | 0.432316189  | 5.21E-21    |
| C6orf223 | brown | 0.123746091  | 0.010215059 | -0.178348581 | 0.000201287 |
| ARMCX2   | brown | -0.079571855 | 0.099383905 | 0.230929606  | 1.30E-06    |
| FAM150B  | brown | -0.347744688 | 1.15E-13    | 0.31055269   | 4.56E-11    |
| F2RL1    | brown | 0.025810359  | 0.59351729  | -0.193647918 | 5.30E-05    |
| CCDC69   | brown | -0.433619813 | 3.86E-21    | 0.631674275  | 2.89E-49    |
| MAPK13   | brown | 0.3343335    | 1.09E-12    | -0.570157246 | 1.94E-38    |
| TRADD    | brown | 0.229463593  | 1.52E-06    | -0.32394126  | 5.81E-12    |
| PRDM6    | brown | -0.49185568  | 1.41E-27    | 0.7906239    | 3.23E-93    |
| RYR2     | brown | -0.370793911 | 1.84E-15    | 0.726331735  | 1.08E-71    |
| ZNF835   | brown | -0.20456933  | 1.91E-05    | 0.421009374  | 6.68E-20    |
| DGKB     | brown | -0.390366502 | 4.20E-17    | 0.663463479  | 6.99E-56    |
| PTGES3L  | brown | -0.4160107   | 2.00E-19    | 0.599926386  | 2.19E-43    |
| CSTB     | brown | 0.179854645  | 0.000177324 | -0.517762764 | 7.32E-31    |
| PGPEP1L  | brown | -0.187246471 | 9.38E-05    | 0.34056575   | 3.88E-13    |
| PDK4     | brown | -0.478431429 | 5.56E-26    | 0.670871527  | 1.53E-57    |
| SEPT4    | brown | -0.056959753 | 0.238532983 | 0.474500352  | 1.58E-25    |
| PRKCSH   | brown | 0.308794963  | 5.94E-11    | -0.45623738  | 1.71E-23    |
| RGS11    | brown | -0.158724452 | 0.000957381 | 0.332921087  | 1.37E-12    |
| THSD7B   | brown | -0.166509443 | 0.000526311 | 0.245436215  | 2.55E-07    |
| SPON1    | brown | -0.350841838 | 6.70E-14    | 0.732185153  | 2.17E-73    |
| LRCH1    | brown | -0.286189966 | 1.50E-09    | 0.64700491   | 2.34E-52    |
| LY6D     | brown | 0.065203832  | 0.17714555  | -0.28463072  | 1.86E-09    |
| ERO1L    | brown | 0.24865667   | 1.76E-07    | -0.368402992 | 2.87E-15    |
| TIMM23   | brown | 0.259729076  | 4.65E-08    | -0.425493091 | 2.46E-20    |
| TMEM150C | brown | -0.204100481 | 2.00E-05    | 0.469623339  | 5.67E-25    |
| DYNLT1   | brown | 0.137834064  | 0.004189259 | -0.286754556 | 1.39E-09    |
| DCAF15   | brown | 0.339977251  | 4.28E-13    | -0.518789005 | 5.35E-31    |
| PRICKLE2 | brown | -0.421259487 | 6.32E-20    | 0.734505405  | 4.47E-74    |
| PQLC2    | brown | 0.431960762  | 5.66E-21    | -0.427701727 | 1.49E-20    |

|          |       |              |             |              |           |
|----------|-------|--------------|-------------|--------------|-----------|
| SPEG     | brown | -0.3836784   | 1.57E-16    | 0.735479654  | 2.29E-74  |
| ISL2     | brown | 0.249379582  | 1.61E-07    | -0.292962551 | 5.88E-10  |
| ACKR3    | brown | -0.185330427 | 0.000110887 | 0.295628506  | 4.03E-10  |
| ADIPOQ   | brown | -0.166501085 | 0.000526656 | 0.41853657   | 1.15E-19  |
| ULBP2    | brown | 0.280343811  | 3.31E-09    | -0.309420768 | 5.41E-11  |
| RBFOX3   | brown | -0.58113935  | 3.33E-40    | 0.822740314  | 4.65E-107 |
| UNC5C    | brown | -0.333492121 | 1.25E-12    | 0.623361442  | 1.17E-47  |
| MTTP     | brown | -0.316249241 | 1.92E-11    | 0.578809598  | 7.99E-40  |
| YTHDF1   | brown | 0.280086897  | 3.43E-09    | -0.35277572  | 4.78E-14  |
| CYFIP2   | brown | -0.15981855  | 0.00088158  | 0.295488711  | 4.11E-10  |
| HAAO     | brown | -0.442188992 | 5.19E-22    | 0.560902484  | 5.31E-37  |
| SRP19    | brown | 0.170886532  | 0.00037159  | -0.283531769 | 2.16E-09  |
| MAGI2    | brown | -0.402751477 | 3.36E-18    | 0.582369516  | 2.09E-40  |
| TSPYL2   | brown | -0.36559085  | 4.81E-15    | 0.46476241   | 1.99E-24  |
| FAM127B  | brown | 0.211063607  | 1.02E-05    | -0.361041904 | 1.10E-14  |
| MDK      | brown | 0.242170031  | 3.72E-07    | -0.306849623 | 7.93E-11  |
| LSR      | brown | 0.321117766  | 9.05E-12    | -0.535383615 | 2.91E-33  |
| CDK5     | brown | 0.363589178  | 6.94E-15    | -0.425370248 | 2.53E-20  |
| HSBP1    | brown | 0.228254084  | 1.73E-06    | -0.374882299 | 8.53E-16  |
| LDOC1    | brown | -0.122491396 | 0.011015024 | 0.195763738  | 4.37E-05  |
| ZNF25    | brown | -0.312619316 | 3.34E-11    | 0.69292103   | 8.79E-63  |
| BTBD6    | brown | 0.178248452  | 0.000202983 | -0.303304486 | 1.34E-10  |
| DDX28    | brown | 0.155157329  | 0.001248279 | -0.391220756 | 3.54E-17  |
| TXNDC17  | brown | 0.185354323  | 0.000110657 | -0.55575229  | 3.21E-36  |
| ACE      | brown | -0.003646068 | 0.939907092 | 0.226070346  | 2.18E-06  |
| FDXR     | brown | 0.222967662  | 3.03E-06    | -0.463036268 | 3.09E-24  |
| CPSF1    | brown | 0.296575729  | 3.53E-10    | -0.357799074 | 1.97E-14  |
| KRTCAP2  | brown | 0.308880492  | 5.86E-11    | -0.455957846 | 1.83E-23  |
| TSLP     | brown | -0.332069925 | 1.58E-12    | 0.329923784  | 2.23E-12  |
| WDR18    | brown | 0.31089225   | 4.34E-11    | -0.501169582 | 1.00E-28  |
| SERTM1   | brown | -0.375865743 | 7.08E-16    | 0.550770549  | 1.77E-35  |
| ZNRD1    | brown | 0.20651419   | 1.59E-05    | -0.486780223 | 5.77E-27  |
| FREM1    | brown | -0.250167353 | 1.47E-07    | 0.34456832   | 1.97E-13  |
| NRXN2    | brown | -0.281162196 | 2.97E-09    | 0.635117818  | 6.05E-50  |
| CLUAP1   | brown | -0.214868253 | 6.95E-06    | 0.36838186   | 2.88E-15  |
| TMEM255B | brown | -0.091216161 | 0.058766754 | 0.432825342  | 4.64E-21  |
| CSRNP3   | brown | -0.306523103 | 8.32E-11    | 0.51367753   | 2.52E-30  |
| TMEM11   | brown | 0.236372314  | 7.13E-07    | -0.376649645 | 6.10E-16  |
| C16orf45 | brown | -0.349854155 | 7.96E-14    | 0.573795776  | 5.13E-39  |
| AGT      | brown | -0.120660247 | 0.012282047 | 0.357029065  | 2.26E-14  |
| CLEC3B   | brown | -0.648797612 | 9.90E-53    | 0.725666738  | 1.68E-71  |
| TTC23    | brown | -0.180679007 | 0.000165367 | 0.36632001   | 4.21E-15  |
| C11orf31 | brown | 0.281379068  | 2.88E-09    | -0.456846596 | 1.47E-23  |
| ERGIC3   | brown | 0.263706777  | 2.84E-08    | -0.414159806 | 2.99E-19  |
| RBCK1    | brown | 0.283015202  | 2.31E-09    | -0.400450126 | 5.42E-18  |
| STARD9   | brown | -0.426962675 | 1.76E-20    | 0.796825862  | 1.08E-95  |
| MCAM     | brown | -0.274422664 | 7.23E-09    | 0.683886289  | 1.40E-60  |
| TCEAL7   | brown | -0.457288096 | 1.31E-23    | 0.784782811  | 5.83E-91  |
| ANKS1B   | brown | -0.403128688 | 3.11E-18    | 0.639857554  | 6.80E-51  |
| ADAMTS4  | brown | -0.27527186  | 6.47E-09    | 0.572179827  | 9.28E-39  |
| RBMS3    | brown | -0.393205931 | 2.38E-17    | 0.768513818  | 4.97E-85  |

|          |       |              |             |              |             |
|----------|-------|--------------|-------------|--------------|-------------|
| C7orf43  | brown | 0.305741797  | 9.34E-11    | -0.420055758 | 8.24E-20    |
| NOVA1    | brown | -0.41369419  | 3.31E-19    | 0.602850543  | 6.72E-44    |
| CNTNAP1  | brown | -0.228271807 | 1.73E-06    | 0.702769983  | 2.80E-65    |
| C6orf132 | brown | 0.097151785  | 0.044063819 | -0.34689002  | 1.33E-13    |
| EGR1     | brown | -0.415557181 | 2.21E-19    | 0.556337336  | 2.62E-36    |
| ZC3H3    | brown | 0.329543245  | 2.38E-12    | -0.423212576 | 4.09E-20    |
| FAXC     | brown | -0.2631475   | 3.05E-08    | 0.512114775  | 4.03E-30    |
| STON1    | brown | -0.405403004 | 1.93E-18    | 0.727993364  | 3.61E-72    |
| LYVE1    | brown | -0.389264966 | 5.23E-17    | 0.729172175  | 1.64E-72    |
| BHMT2    | brown | -0.5980988   | 4.57E-43    | 0.897116968  | 6.12E-154   |
| C16orf89 | brown | -0.675615454 | 1.25E-58    | 0.73812846   | 3.68E-75    |
| NLGN1    | brown | -0.418409892 | 1.18E-19    | 0.594569702  | 1.86E-42    |
| GPR146   | brown | -0.343535722 | 2.35E-13    | 0.637878932  | 1.70E-50    |
| TUBB4B   | brown | 0.109463924  | 0.023200884 | -0.438886937 | 1.13E-21    |
| ROR1     | brown | -0.392959032 | 2.50E-17    | 0.740280673  | 8.17E-76    |
| GJA4     | brown | -0.148659056 | 0.001995656 | 0.472237971  | 2.87E-25    |
| SPRY1    | brown | -0.382621141 | 1.93E-16    | 0.644898307  | 6.37E-52    |
| CTS0     | brown | -0.168346059 | 0.000455256 | 0.428032395  | 1.39E-20    |
| CMC1     | brown | 0.302592815  | 1.48E-10    | -0.360678404 | 1.17E-14    |
| CPNE1    | brown | 0.259433392  | 4.82E-08    | -0.340421405 | 3.97E-13    |
| SPRY2    | brown | -0.2315843   | 1.21E-06    | 0.324900723  | 4.99E-12    |
| RPP38    | brown | 0.250977083  | 1.34E-07    | -0.432343736 | 5.18E-21    |
| HBM      | brown | 0.00103587   | 0.982912428 | 0.175534075  | 0.000254394 |
| TIMP4    | brown | -0.151292672 | 0.00165368  | 0.311192262  | 4.15E-11    |
| LMOD3    | brown | -0.614382284 | 5.58E-46    | 0.750151544  | 6.78E-79    |
| GNG7     | brown | -0.516659302 | 1.02E-30    | 0.684099533  | 1.25E-60    |
| RDH5     | brown | -0.209480789 | 1.19E-05    | 0.529079916  | 2.18E-32    |
| WISP2    | brown | -0.286367787 | 1.47E-09    | 0.615498136  | 3.47E-46    |
| METTL1   | brown | 0.323068752  | 6.66E-12    | -0.454121059 | 2.88E-23    |
| TMEM252  | brown | -0.584194461 | 1.04E-40    | 0.801748066  | 1.01E-97    |
| DAZAP1   | brown | 0.394161724  | 1.96E-17    | -0.597550307 | 5.69E-43    |
| HOPX     | brown | -0.040282623 | 0.404717848 | 0.197100765  | 3.86E-05    |
| RNF149   | brown | 0.2420375    | 3.77E-07    | -0.400111624 | 5.81E-18    |
| PTPN3    | brown | 0.204477457  | 1.93E-05    | -0.302608323 | 1.48E-10    |
| LPPR2    | brown | -0.044612081 | 0.356078861 | 0.203244914  | 2.17E-05    |
| GPR87    | brown | 0.13762304   | 0.004248164 | -0.286307796 | 1.48E-09    |
| TLCD1    | brown | 0.303339178  | 1.33E-10    | -0.495114999 | 5.65E-28    |
| E2F4     | brown | 0.220496715  | 3.91E-06    | -0.295725674 | 3.98E-10    |
| pk       | brown | -0.40599625  | 1.71E-18    | 0.732169651  | 2.19E-73    |
| NTRK2    | brown | -0.150934306 | 0.00169682  | 0.326017478  | 4.18E-12    |
| TGFBR2   | brown | -0.282342342 | 2.53E-09    | 0.605936448  | 1.90E-44    |
| TMEM240  | brown | -0.214264404 | 7.38E-06    | 0.388389309  | 6.23E-17    |
| NR3C2    | brown | -0.489975245 | 2.39E-27    | 0.680242817  | 1.03E-59    |
| PLD2     | brown | 0.098725295  | 0.040731447 | -0.23594794  | 7.48E-07    |
| C2CD4B   | brown | -0.359269545 | 1.51E-14    | 0.435435772  | 2.54E-21    |
| ZNF728   | brown | -0.300668548 | 1.96E-10    | 0.422942985  | 4.35E-20    |
| P4HA1    | brown | 0.195481702  | 4.48E-05    | -0.199712598 | 3.03E-05    |
| PRKAG2   | brown | -0.366145227 | 4.35E-15    | 0.529642325  | 1.83E-32    |
| SLC39A4  | brown | 0.365218601  | 5.15E-15    | -0.551540481 | 1.36E-35    |
| SH2D3A   | brown | 0.183622115  | 0.000128564 | -0.511908636 | 4.28E-30    |
| TMEM81   | brown | 0.216457486  | 5.92E-06    | -0.20756327  | 1.43E-05    |

|          |       |              |             |              |             |
|----------|-------|--------------|-------------|--------------|-------------|
| FBXL7    | brown | -0.432264427 | 5.27E-21    | 0.847314527  | 1.07E-119   |
| KRT222   | brown | -0.210500724 | 1.07E-05    | 0.350970551  | 6.56E-14    |
| CCDC81   | brown | -0.212711814 | 8.62E-06    | 0.387175279  | 7.92E-17    |
| SYNM     | brown | -0.49769608  | 2.71E-28    | 0.859918227  | 4.45E-127   |
| S100A11  | brown | 0.297165772  | 3.24E-10    | -0.565355576 | 1.09E-37    |
| PINK1    | brown | -0.14281787  | 0.002996049 | 0.287293076  | 1.29E-09    |
| KIAA0408 | brown | -0.502336148 | 7.15E-29    | 0.636939411  | 2.62E-50    |
| IL1RL1   | brown | -0.120327469 | 0.012525641 | 0.27927597   | 3.82E-09    |
| PER2     | brown | -0.467683599 | 9.38E-25    | 0.415887051  | 2.05E-19    |
| CGB7     | brown | 0.124313481  | 0.009870543 | -0.221249359 | 3.62E-06    |
| TCEAL1   | brown | -0.308592198 | 6.12E-11    | 0.399565801  | 6.51E-18    |
| ANK2     | brown | -0.487195014 | 5.15E-27    | 0.79115283   | 2.00E-93    |
| NANOS1   | brown | -0.08503256  | 0.078182357 | 0.290586219  | 8.19E-10    |
| PACSIN2  | brown | -0.110621632 | 0.021775158 | 0.3249613    | 4.94E-12    |
| PCDH18   | brown | -0.325018151 | 4.90E-12    | 0.767336772  | 1.28E-84    |
| CHRM3    | brown | -0.371325236 | 1.66E-15    | 0.6172349    | 1.66E-46    |
| HTR2A    | brown | -0.309671214 | 5.21E-11    | 0.697700743  | 5.56E-64    |
| SLC6A16  | brown | -0.107454414 | 0.025867777 | 0.253542455  | 9.84E-08    |
| MECP2    | brown | -0.198710515 | 3.32E-05    | 0.362375346  | 8.65E-15    |
| C6       | brown | -0.166796802 | 0.000514553 | 0.42613222   | 2.13E-20    |
| ZCWPW2   | brown | -0.417539193 | 1.43E-19    | 0.605154701  | 2.62E-44    |
| SCRG1    | brown | -0.293666572 | 5.32E-10    | 0.771541887  | 4.26E-86    |
| GNB2     | brown | 0.233153293  | 1.02E-06    | -0.380094051 | 3.15E-16    |
| CABS1    | brown | -0.39759673  | 9.75E-18    | 0.345975146  | 1.55E-13    |
| RPP25L   | brown | 0.128768525  | 0.007504919 | -0.404639547 | 2.27E-18    |
| ADAMTS17 | brown | -0.050753221 | 0.293693053 | 0.269515545  | 1.36E-08    |
| TGIF1    | brown | 0.136778429  | 0.004491493 | -0.250234737 | 1.46E-07    |
| DDX41    | brown | 0.318351982  | 1.39E-11    | -0.428488711 | 1.25E-20    |
| TSPAN2   | brown | -0.319698072 | 1.13E-11    | 0.611869844  | 1.61E-45    |
| UBE2L3   | brown | 0.220684196  | 3.84E-06    | -0.341126447 | 3.53E-13    |
| AKR1A1   | brown | 0.270301309  | 1.23E-08    | -0.378762702 | 4.07E-16    |
| C22orf39 | brown | -0.214787418 | 7.01E-06    | 0.307005431  | 7.75E-11    |
| TP53INP2 | brown | -0.404606744 | 2.28E-18    | 0.512045646  | 4.11E-30    |
| NGFR     | brown | -0.19759026  | 3.69E-05    | 0.469958816  | 5.20E-25    |
| NOTCH4   | brown | -0.062404952 | 0.196513404 | 0.382737717  | 1.89E-16    |
| PDZRN3   | brown | -0.425075995 | 2.70E-20    | 0.801867636  | 9.00E-98    |
| SVEP1    | brown | -0.542661732 | 2.69E-34    | 0.768965572  | 3.45E-85    |
| CC2D2A   | brown | -0.347019457 | 1.30E-13    | 0.584889387  | 8.01E-41    |
| SHROOM4  | brown | -0.107232964 | 0.02617723  | 0.326523636  | 3.85E-12    |
| PCDHGA12 | brown | -0.240061622 | 4.72E-07    | 0.682208767  | 3.53E-60    |
| PLEKHH2  | brown | -0.199255194 | 3.16E-05    | 0.312363903  | 3.47E-11    |
| ADARB1   | brown | -0.309871733 | 5.05E-11    | 0.694804792  | 2.98E-63    |
| SCN4B    | brown | -0.399210023 | 7.00E-18    | 0.525032812  | 7.78E-32    |
| VSX1     | brown | -0.208327232 | 1.33E-05    | 0.367782423  | 3.22E-15    |
| PALMD    | brown | -0.107269107 | 0.026126508 | 0.163397933  | 0.000670624 |
| ATP5H    | brown | 0.184155749  | 0.000122777 | -0.41124974  | 5.59E-19    |
| TBX5     | brown | -0.41181919  | 4.95E-19    | 0.683661097  | 1.59E-60    |
| PKIB     | brown | 0.135124359  | 0.005004791 | -0.158306178 | 0.000987917 |
| NEGR1    | brown | -0.584348474 | 9.85E-41    | 0.877551874  | 1.03E-138   |
| NUDT14   | brown | 0.219643469  | 4.27E-06    | -0.377370105 | 5.31E-16    |
| FIGF     | brown | -0.521373301 | 2.42E-31    | 0.653200577  | 1.17E-53    |



|          |       |              |             |              |           |
|----------|-------|--------------|-------------|--------------|-----------|
| PRKAA2   | brown | -0.361626074 | 9.90E-15    | 0.495804267  | 4.65E-28  |
| CDC42BPA | brown | -0.290793479 | 7.96E-10    | 0.571470576  | 1.20E-38  |
| NNAT     | brown | -0.168294056 | 0.000457139 | 0.219167547  | 4.49E-06  |
| DIXDC1   | brown | -0.475428874 | 1.24E-25    | 0.905930734  | 7.75E-162 |
| CERS4    | brown | -0.161187308 | 0.000794559 | 0.234243509  | 9.03E-07  |
| COL4A6   | brown | -0.27584848  | 6.00E-09    | 0.284767632  | 1.82E-09  |
| SFN      | brown | 0.23029397   | 1.39E-06    | -0.475682508 | 1.16E-25  |
| APOLD1   | brown | -0.426441812 | 1.98E-20    | 0.659843197  | 4.35E-55  |
| KIAA0513 | brown | -0.33829324  | 5.67E-13    | 0.467612169  | 9.55E-25  |
| DSEL     | brown | -0.224757048 | 2.51E-06    | 0.512361041  | 3.74E-30  |
| MICU3    | brown | -0.55187074  | 1.22E-35    | 0.840465209  | 5.84E-116 |
| HRASLS5  | brown | -0.201578356 | 2.54E-05    | 0.410456986  | 6.62E-19  |
| KDF1     | brown | 0.306924222  | 7.84E-11    | -0.603655243 | 4.84E-44  |
| PKHD1L1  | brown | -0.190602865 | 6.97E-05    | 0.319165449  | 1.23E-11  |
| MIEN1    | brown | 0.259117277  | 5.01E-08    | -0.458515396 | 9.67E-24  |
| MRPL4    | brown | 0.205153693  | 1.81E-05    | -0.425848923 | 2.27E-20  |
| DPP9     | brown | 0.24097305   | 4.26E-07    | -0.25662118  | 6.79E-08  |
| PRKG1    | brown | -0.420849393 | 6.92E-20    | 0.873042183  | 1.42E-135 |
| SHKBP1   | brown | 0.291779805  | 6.93E-10    | -0.366176783 | 4.32E-15  |
| BID      | brown | 0.354902711  | 3.29E-14    | -0.446072662 | 2.05E-22  |
| SGCA     | brown | -0.457845526 | 1.14E-23    | 0.793889452  | 1.64E-94  |
| TIMM17B  | brown | 0.253685865  | 9.68E-08    | -0.495379678 | 5.24E-28  |
| ZER1     | brown | -0.186987793 | 9.59E-05    | 0.206346886  | 1.61E-05  |
| SOX17    | brown | -0.5011429   | 1.01E-28    | 0.647924397  | 1.51E-52  |
| CAP2     | brown | -0.310586848 | 4.54E-11    | 0.587315823  | 3.16E-41  |
| CD300LG  | brown | -0.474492646 | 1.58E-25    | 0.654127315  | 7.43E-54  |
| SLC22A17 | brown | -0.192676614 | 5.78E-05    | 0.322255871  | 7.57E-12  |
| GPRASP2  | brown | -0.311786576 | 3.79E-11    | 0.518145174  | 6.52E-31  |
| MED18    | brown | 0.211492321  | 9.74E-06    | -0.375476006 | 7.62E-16  |
| RAD9A    | brown | 0.298042415  | 2.86E-10    | -0.493046938 | 1.01E-27  |
| ARHGEF17 | brown | -0.236267445 | 7.22E-07    | 0.683962816  | 1.35E-60  |
| NDUFB4   | brown | 0.214108444  | 7.50E-06    | -0.396320012 | 1.26E-17  |
| PPME1    | brown | 0.195256945  | 4.57E-05    | -0.289096988 | 1.01E-09  |
| VPS16    | brown | 0.267007191  | 1.88E-08    | -0.276466095 | 5.53E-09  |
| A2M      | brown | -0.356852543 | 2.33E-14    | 0.734480029  | 4.55E-74  |
| GNL2     | brown | 0.242021983  | 3.78E-07    | -0.394355097 | 1.89E-17  |
| RHBDD3   | brown | 0.321546725  | 8.46E-12    | -0.365439607 | 4.95E-15  |
| HSPG2    | brown | -0.210581697 | 1.07E-05    | 0.69892577   | 2.72E-64  |
| ARHGAP24 | brown | -0.334664788 | 1.03E-12    | 0.762686978  | 5.05E-83  |
| RBFA     | brown | 0.12097491   | 0.012055569 | -0.223387193 | 2.90E-06  |
| HBA2     | brown | -0.21899284  | 4.57E-06    | 0.257927098  | 5.80E-08  |
| LPAR3    | brown | 0.082734868  | 0.086607437 | -0.231008725 | 1.29E-06  |
| TNFRSF25 | brown | 0.277050886  | 5.12E-09    | -0.429151662 | 1.07E-20  |
| FSCN1    | brown | 0.199276478  | 3.15E-05    | -0.297014305 | 3.31E-10  |
| KIAA1644 | brown | -0.514944842 | 1.72E-30    | 0.866362501  | 3.89E-131 |
| FOSB     | brown | -0.420091892 | 8.18E-20    | 0.341571032  | 3.28E-13  |
| TSTD1    | brown | 0.251604552  | 1.24E-07    | -0.464761193 | 1.99E-24  |
| ADPRHL2  | brown | 0.333303708  | 1.29E-12    | -0.484374967 | 1.12E-26  |
| KL       | brown | -0.089445488 | 0.063868325 | 0.296352994  | 3.64E-10  |
| ZNF331   | brown | -0.182489608 | 0.000141707 | 0.21735523   | 5.40E-06  |
| ITGA9    | brown | -0.364914273 | 5.45E-15    | 0.711502591  | 1.40E-67  |

|          |       |              |             |              |             |
|----------|-------|--------------|-------------|--------------|-------------|
| GIPC1    | brown | 0.264921769  | 2.44E-08    | -0.572240496 | 9.08E-39    |
| SLC25A30 | brown | -0.107281547 | 0.026109069 | 0.40548125   | 1.90E-18    |
| DUSP23   | brown | 0.224853574  | 2.48E-06    | -0.285271324 | 1.70E-09    |
| SPINK13  | brown | -0.149466821 | 0.001884451 | 0.205007908  | 1.83E-05    |
| SUV420H2 | brown | 0.268863835  | 1.48E-08    | -0.351826656 | 5.65E-14    |
| ALDH7A1  | brown | -0.13005824  | 0.006921997 | 0.184835949  | 0.000115754 |
| PRAC1    | brown | -0.356502503 | 2.48E-14    | 0.26394583   | 2.76E-08    |
| LTBR     | brown | 0.272543344  | 9.23E-09    | -0.466846494 | 1.16E-24    |
| BDNF     | brown | -0.287591809 | 1.24E-09    | 0.415446335  | 2.26E-19    |
| RAMP3    | brown | -0.157612461 | 0.001040548 | 0.437412404  | 1.60E-21    |
| RUVBL2   | brown | 0.334189716  | 1.12E-12    | -0.547910817 | 4.66E-35    |
| TMEM138  | brown | 0.311490903  | 3.96E-11    | -0.34462103  | 1.96E-13    |
| CALCOCO1 | brown | -0.284578381 | 1.87E-09    | 0.467751623  | 9.22E-25    |
| KCNN3    | brown | -0.324514198 | 5.30E-12    | 0.590569062  | 8.95E-42    |
| TRIM3    | brown | -0.123460595 | 0.010392412 | 0.404810495  | 2.19E-18    |
| HLX      | brown | -0.067711585 | 0.161028995 | 0.412904248  | 3.92E-19    |
| ACTR5    | brown | 0.300504242  | 2.01E-10    | -0.391760836 | 3.18E-17    |
| WLS      | brown | -0.235442836 | 7.91E-07    | 0.405860113  | 1.76E-18    |
| POMGNT1  | brown | 0.24265296   | 3.52E-07    | -0.361312873 | 1.05E-14    |
| NLE1     | brown | 0.22026642   | 4.01E-06    | -0.364288051 | 6.11E-15    |
| AGTR1    | brown | -0.472318029 | 2.81E-25    | 0.734259954  | 5.29E-74    |
| LONRF2   | brown | -0.372244552 | 1.40E-15    | 0.582445295  | 2.03E-40    |
| RGS5     | brown | -0.340221589 | 4.11E-13    | 0.660425653  | 3.25E-55    |
| AFF3     | brown | -0.546208394 | 8.26E-35    | 0.752651122  | 1.07E-79    |
| PKD2     | brown | -0.233789434 | 9.49E-07    | 0.600129508  | 2.02E-43    |
| WBSCR17  | brown | -0.476573047 | 9.12E-26    | 0.794384979  | 1.04E-94    |
| POR      | brown | 0.210998576  | 1.02E-05    | -0.357257618 | 2.17E-14    |
| ANGPTL1  | brown | -0.398101711 | 8.79E-18    | 0.815250787  | 1.37E-103   |
| TMEM177  | brown | 0.307428774  | 7.28E-11    | -0.390484685 | 4.10E-17    |
| APEH     | brown | 0.196920783  | 3.92E-05    | -0.334540877 | 1.05E-12    |
| MEIS2    | brown | -0.329130945 | 2.54E-12    | 0.565474566  | 1.05E-37    |
| ENOX1    | brown | -0.179389241 | 0.000184428 | 0.513723738  | 2.49E-30    |
| ARHGAP10 | brown | -0.305422159 | 9.79E-11    | 0.414627416  | 2.70E-19    |
| FAXDC2   | brown | -0.496453399 | 3.86E-28    | 0.769191723  | 2.88E-85    |
| PMF1     | brown | 0.239263335  | 5.16E-07    | -0.39611907  | 1.32E-17    |
| MYH3     | brown | -0.284947079 | 1.78E-09    | 0.568845083  | 3.12E-38    |
| JTB      | brown | 0.343197564  | 2.49E-13    | -0.415293738 | 2.34E-19    |
| CHURC1   | brown | -0.233308323 | 1.00E-06    | 0.445028103  | 2.64E-22    |
| ENG      | brown | -0.021059558 | 0.663215927 | 0.309203183  | 5.59E-11    |
| RNASE4   | brown | -0.431496233 | 6.29E-21    | 0.539273795  | 8.21E-34    |
| TSPAN7   | brown | -0.294738768 | 4.57E-10    | 0.430986931  | 7.07E-21    |
| GYG1     | brown | -0.203858403 | 2.05E-05    | 0.394556376  | 1.81E-17    |
| GTF2E2   | brown | 0.163829897  | 0.000648604 | -0.240498965 | 4.49E-07    |
| FZR1     | brown | 0.188266785  | 8.57E-05    | -0.34666323  | 1.38E-13    |
| ARHGAP20 | brown | -0.539417418 | 7.83E-34    | 0.87245608   | 3.57E-135   |
| C3orf70  | brown | -0.360261778 | 1.27E-14    | 0.645886645  | 3.99E-52    |
| SYNGR2   | brown | 0.335073441  | 9.66E-13    | -0.415980203 | 2.01E-19    |
| ZSCAN18  | brown | -0.167302507 | 0.000494451 | 0.253960209  | 9.36E-08    |
| MYOZ1    | brown | -0.03951696  | 0.413714082 | 0.243229537  | 3.29E-07    |
| DIRAS1   | brown | -0.239213028 | 5.19E-07    | 0.470149331  | 4.95E-25    |
| SPRY4    | brown | 0.079459874  | 0.099862324 | 0.112982442  | 0.019101592 |

|           |       |              |             |              |             |
|-----------|-------|--------------|-------------|--------------|-------------|
| NHP2      | brown | 0.143040285  | 0.002950837 | -0.366308028 | 4.22E-15    |
| PDLIM3    | brown | -0.376668883 | 6.07E-16    | 0.793111367  | 3.35E-94    |
| DSTN      | brown | -0.414510798 | 2.77E-19    | 0.59167271   | 5.81E-42    |
| PPP1R16A  | brown | 0.310571133  | 4.55E-11    | -0.53666114  | 1.92E-33    |
| DACT2     | brown | -0.11969478  | 0.013000553 | 0.185811561  | 0.000106337 |
| WSCD1     | brown | -0.097607569 | 0.04307576  | 0.352904532  | 4.68E-14    |
| SLMAP     | brown | -0.421249279 | 6.33E-20    | 0.718130087  | 2.19E-69    |
| HIST3H2A  | brown | 0.351626736  | 5.85E-14    | -0.40627818  | 1.61E-18    |
| ZBTB4     | brown | -0.35519698  | 3.12E-14    | 0.504487626  | 3.83E-29    |
| ZNF423    | brown | -0.180194367 | 0.000172302 | 0.367450828  | 3.42E-15    |
| TUT1      | brown | 0.249740427  | 1.55E-07    | -0.424803714 | 2.87E-20    |
| CNTN1     | brown | -0.371635697 | 1.57E-15    | 0.664949227  | 3.28E-56    |
| SEMA6B    | brown | -0.135024878 | 0.005037285 | 0.411509438  | 5.29E-19    |
| CPT1A     | brown | -0.12646012  | 0.008658617 | 0.220125543  | 4.07E-06    |
| MRPL21    | brown | 0.168578791  | 0.000446918 | -0.406308906 | 1.60E-18    |
| UQCC2     | brown | 0.262903351  | 3.14E-08    | -0.445383394 | 2.42E-22    |
| MST1R     | brown | 0.108936238  | 0.023877084 | -0.291133703 | 7.59E-10    |
| C20orf194 | brown | -0.274062801 | 7.58E-09    | 0.38364932   | 1.58E-16    |
| NPTX1     | brown | -0.212931323 | 8.44E-06    | 0.311937562  | 3.70E-11    |
| SOX18     | brown | -0.105561481 | 0.028617479 | 0.295552225  | 4.08E-10    |
| APLNR     | brown | -0.010339401 | 0.830715496 | 0.421955052  | 5.41E-20    |
| COX19     | brown | 0.296882983  | 3.37E-10    | -0.396261905 | 1.28E-17    |
| VLDLR     | brown | -0.169860527 | 0.000403488 | 0.361284584  | 1.05E-14    |
| ASL       | brown | 0.217676745  | 5.23E-06    | -0.29810541  | 2.83E-10    |
| RANGAP1   | brown | 0.298534694  | 2.66E-10    | -0.536050523 | 2.34E-33    |
| LIFR      | brown | -0.330441767 | 2.05E-12    | 0.570856241  | 1.51E-38    |
| ERG       | brown | -0.220373552 | 3.96E-06    | 0.60223759   | 8.62E-44    |
| NACC2     | brown | -0.414488455 | 2.78E-19    | 0.732590716  | 1.65E-73    |
| IL17RD    | brown | -0.206548075 | 1.58E-05    | 0.452489368  | 4.31E-23    |
| PARVA     | brown | -0.310083371 | 4.90E-11    | 0.673233159  | 4.41E-58    |
| KLHL13    | brown | -0.353522109 | 4.20E-14    | 0.494970397  | 5.88E-28    |
| HSPA12A   | brown | -0.342416661 | 2.84E-13    | 0.662463004  | 1.16E-55    |
| GNA14     | brown | -0.21347985  | 7.99E-06    | 0.391512985  | 3.34E-17    |
| C1QTNF3   | brown | -0.158007698 | 0.001010254 | 0.437531184  | 1.56E-21    |
| PPP3CB    | brown | -0.322131324 | 7.72E-12    | 0.555186507  | 3.90E-36    |
| FYCO1     | brown | -0.3639972   | 6.44E-15    | 0.628189808  | 1.38E-48    |
| MCAT      | brown | 0.238575448  | 5.58E-07    | -0.451206084 | 5.91E-23    |
| TRIM63    | brown | -0.285326433 | 1.69E-09    | 0.51470613   | 1.85E-30    |
| PODN      | brown | -0.324672313 | 5.17E-12    | 0.69146746   | 2.01E-62    |
| RUNDC3B   | brown | -0.418062579 | 1.28E-19    | 0.546043204  | 8.73E-35    |
| SSTR1     | brown | -0.322678497 | 7.08E-12    | 0.392628989  | 2.67E-17    |
| GNAZ      | brown | -0.336435783 | 7.71E-13    | 0.60428396   | 3.74E-44    |
| PPP1R13L  | brown | 0.261118359  | 3.92E-08    | -0.530632114 | 1.33E-32    |
| SCN7A     | brown | -0.564220553 | 1.64E-37    | 0.666521528  | 1.46E-56    |
| AMOTL1    | brown | -0.262529686 | 3.29E-08    | 0.52439409   | 9.49E-32    |
| CADM3     | brown | -0.473242586 | 2.20E-25    | 0.653374802  | 1.07E-53    |
| CCDC22    | brown | 0.111095391  | 0.021214004 | -0.302257864 | 1.56E-10    |
| RNASEK    | brown | 0.191720658  | 6.30E-05    | -0.285194152 | 1.72E-09    |
| FZD4      | brown | -0.118271684 | 0.014127165 | 0.385312385  | 1.14E-16    |
| MRPL2     | brown | 0.272869604  | 8.85E-09    | -0.448883971 | 1.04E-22    |
| PKD1      | brown | -0.355807813 | 2.80E-14    | 0.610782225  | 2.54E-45    |

|            |       |              |             |              |             |
|------------|-------|--------------|-------------|--------------|-------------|
| PALLD      | brown | -0.363502966 | 7.05E-15    | 0.744021613  | 5.77E-77    |
| PSMG4      | brown | 0.244717974  | 2.77E-07    | -0.342230148 | 2.93E-13    |
| TMEM55A    | brown | -0.244441367 | 2.86E-07    | 0.568109617  | 4.07E-38    |
| KCNK6      | brown | -0.149231001 | 0.001916315 | 0.182361107  | 0.000143275 |
| PUSL1      | brown | 0.294956794  | 4.44E-10    | -0.51984015  | 3.88E-31    |
| PRKCA      | brown | -0.15380994  | 0.001377884 | 0.331434174  | 1.75E-12    |
| Clorf21    | brown | -0.299639688 | 2.27E-10    | 0.300733479  | 1.94E-10    |
| SPECC1L    | brown | -0.077047019 | 0.110622236 | 0.350498813  | 7.12E-14    |
| ATP6V0A1   | brown | -0.036710827 | 0.447677919 | 0.217176642  | 5.50E-06    |
| HMGCLL1    | brown | -0.426537096 | 1.94E-20    | 0.385061142  | 1.20E-16    |
| LRRN4CL    | brown | -0.487754612 | 4.41E-27    | 0.72291322   | 1.01E-70    |
| ZNF366     | brown | -0.142236897 | 0.003117134 | 0.564373701  | 1.55E-37    |
| VWA1       | brown | -0.01998157  | 0.679473427 | 0.181988022  | 0.000147922 |
| FAM110B    | brown | -0.310925462 | 4.32E-11    | 0.662416479  | 1.19E-55    |
| RP11-216L1 | brown | -0.169183981 | 0.000425897 | 0.259534322  | 4.76E-08    |
| VCL        | brown | -0.305218198 | 1.01E-10    | 0.615162602  | 4.01E-46    |
| TPSD1      | brown | -0.35546885  | 2.98E-14    | 0.613030265  | 9.89E-46    |
| ACKR1      | brown | -0.375878335 | 7.06E-16    | 0.616828603  | 1.97E-46    |
| DTWD1      | brown | -0.202067497 | 2.43E-05    | 0.423422465  | 3.91E-20    |
| MFAP4      | brown | -0.391923028 | 3.08E-17    | 0.688219463  | 1.26E-61    |
| TSPAN17    | brown | 0.275004161  | 6.70E-09    | -0.335644054 | 8.79E-13    |
| SMARCA4    | brown | 0.281299513  | 2.91E-09    | -0.350838924 | 6.71E-14    |
| MRPS34     | brown | 0.327839668  | 3.12E-12    | -0.577921243 | 1.11E-39    |
| EFHD2      | brown | 0.204878669  | 1.86E-05    | -0.482948156 | 1.64E-26    |
| PEBP4      | brown | -0.170616038 | 0.000379764 | 0.331153875  | 1.83E-12    |
| CYP7A1     | brown | -0.098093926 | 0.04204207  | 0.223362954  | 2.90E-06    |
| HLF        | brown | -0.700995479 | 8.03E-65    | 0.869508252  | 3.39E-133   |
| TIMM13     | brown | 0.287161331  | 1.31E-09    | -0.507551275 | 1.56E-29    |
| TPRA1      | brown | 0.321685786  | 8.28E-12    | -0.43380988  | 3.69E-21    |
| MEF2D      | brown | -0.417193742 | 1.55E-19    | 0.653032226  | 1.27E-53    |
| ERCC2      | brown | 0.247296004  | 2.06E-07    | -0.301182045 | 1.82E-10    |
| CCDC102B   | brown | -0.075467618 | 0.118145868 | 0.443005876  | 4.27E-22    |
| GJB6       | brown | 0.161651625  | 0.000766892 | -0.332201736 | 1.54E-12    |
| REEP2      | brown | -0.258974968 | 5.10E-08    | 0.56936138   | 2.59E-38    |
| VDAC1      | brown | 0.305861785  | 9.17E-11    | -0.409509945 | 8.11E-19    |
| CAND2      | brown | -0.186576557 | 9.95E-05    | 0.431504532  | 6.28E-21    |
| EMC4       | brown | 0.20046713   | 2.82E-05    | -0.385382647 | 1.13E-16    |
| ADRB3      | brown | -0.5073951   | 1.63E-29    | 0.819294119  | 1.92E-105   |
| RP11-903H1 | brown | -0.451001793 | 6.21E-23    | 0.617271402  | 1.63E-46    |
| RELL2      | brown | 0.280793749  | 3.12E-09    | -0.325818469 | 4.31E-12    |
| PTBP2      | brown | -0.240108071 | 4.69E-07    | 0.464334537  | 2.22E-24    |
| ALDH16A1   | brown | 0.257976746  | 5.76E-08    | -0.389578801 | 4.92E-17    |
| MYCT1      | brown | -0.332389234 | 1.50E-12    | 0.684696866  | 8.97E-61    |
| WFS1       | brown | -0.163342347 | 0.000673507 | 0.207080717  | 1.50E-05    |
| SHPK       | brown | 0.216692341  | 5.78E-06    | -0.309124358 | 5.65E-11    |
| KRT19      | brown | 0.200831783  | 2.73E-05    | -0.470790085 | 4.19E-25    |
| H1FNT      | brown | -0.078125921 | 0.105703259 | 0.212164467  | 9.11E-06    |
| MIF        | brown | 0.277000763  | 5.16E-09    | -0.553131531 | 7.90E-36    |
| MEIS1      | brown | -0.380589501 | 2.86E-16    | 0.530728175  | 1.29E-32    |
| RHBDD2     | brown | 0.190730921  | 6.89E-05    | -0.29606162  | 3.79E-10    |
| SYNJ2BP-CO | brown | -0.195738353 | 4.38E-05    | 0.258623689  | 5.32E-08    |

|            |       |              |             |              |             |
|------------|-------|--------------|-------------|--------------|-------------|
| GPR4       | brown | -0.023328111 | 0.629522141 | 0.314403808  | 2.55E-11    |
| TMEM238    | brown | 0.255597645  | 7.69E-08    | -0.439289181 | 1.03E-21    |
| UNC93B1    | brown | 0.233035246  | 1.03E-06    | -0.439856087 | 9.01E-22    |
| NIT2       | brown | 0.339490235  | 4.64E-13    | -0.503741013 | 4.76E-29    |
| OLFM1      | brown | -0.407086529 | 1.36E-18    | 0.616357466  | 2.41E-46    |
| GLIPR1L2   | brown | -0.32661435  | 3.80E-12    | 0.314275237  | 2.60E-11    |
| SLC51B     | brown | -0.401975027 | 3.95E-18    | 0.688067236  | 1.37E-61    |
| NCAM1      | brown | -0.478087475 | 6.09E-26    | 0.801313926  | 1.53E-97    |
| MRPL32     | brown | 0.265396271  | 2.30E-08    | -0.461531729 | 4.52E-24    |
| LTBP4      | brown | -0.438889757 | 1.13E-21    | 0.50341118   | 5.24E-29    |
| DALRD3     | brown | 0.169371514  | 0.000419572 | -0.224207558 | 2.66E-06    |
| RP5-877J2. | brown | -0.265397422 | 2.30E-08    | 0.330774215  | 1.95E-12    |
| ELANE      | brown | -0.598273022 | 4.26E-43    | 0.553945177  | 5.98E-36    |
| MPDU1      | brown | 0.2258626    | 2.23E-06    | -0.357145506 | 2.21E-14    |
| RPP21      | brown | 0.252717888  | 1.09E-07    | -0.525688783 | 6.34E-32    |
| TXN        | brown | 0.163182673  | 0.000681854 | -0.380281308 | 3.04E-16    |
| SMN1       | brown | 0.140557032  | 0.003492675 | -0.329107936 | 2.55E-12    |
| STXBP2     | brown | 0.366379012  | 4.16E-15    | -0.645139973 | 5.68E-52    |
| WISP3      | brown | 0.101998507  | 0.034477134 | -0.186188733 | 0.000102894 |
| NRTN       | brown | -0.132494637 | 0.0059303   | 0.297865364  | 2.93E-10    |
| NR4A1      | brown | -0.501620515 | 8.80E-29    | 0.559727994  | 8.03E-37    |
| GJB3       | brown | 0.124642457  | 0.009675551 | -0.364466591 | 5.91E-15    |
| P4HB       | brown | 0.38393487   | 1.50E-16    | -0.370583642 | 1.91E-15    |
| NDRG1      | brown | 0.060267414  | 0.212313968 | -0.214979237 | 6.87E-06    |
| TBCC       | brown | 0.174840442  | 0.000269359 | -0.273917273 | 7.73E-09    |
| OSTF1      | brown | 0.110754889  | 0.021616033 | -0.278369738 | 4.30E-09    |
| ADAM33     | brown | -0.505012919 | 3.28E-29    | 0.804682138  | 5.87E-99    |
| PLEKHG5    | brown | 0.167806334  | 0.000475152 | -0.271703515 | 1.03E-08    |
| ANKRD39    | brown | 0.21726278   | 5.45E-06    | -0.354105692 | 3.79E-14    |
| FGD5       | brown | -0.129365088 | 0.007230043 | 0.293565892  | 5.40E-10    |
| TMEM204    | brown | -0.097254801 | 0.043838845 | 0.331881373  | 1.63E-12    |
| MEF2C      | brown | -0.365839131 | 4.60E-15    | 0.799024962  | 1.36E-96    |
| RP9        | brown | 0.306038745  | 8.94E-11    | -0.327370291 | 3.37E-12    |
| AP000350.1 | brown | 0.120995075  | 0.012041182 | -0.214608121 | 7.13E-06    |
| SLC45A1    | brown | -0.212677729 | 8.65E-06    | 0.437470528  | 1.58E-21    |
| CKB        | brown | -0.305795339 | 9.26E-11    | 0.33848528   | 5.49E-13    |
| UCHL3      | brown | 0.229215798  | 1.56E-06    | -0.479466522 | 4.21E-26    |
| THBS3      | brown | -0.051880024 | 0.283092348 | 0.236394774  | 7.12E-07    |
| FGFBP2     | brown | -0.131304093 | 0.00639773  | 0.213693742  | 7.82E-06    |
| EXOC3L2    | brown | 0.011213748  | 0.81664392  | 0.141115242  | 0.003363562 |
| MMP27      | brown | -0.594315389 | 2.06E-42    | 0.538552104  | 1.04E-33    |
| FKBPL      | brown | 0.35006181   | 7.68E-14    | -0.485164522 | 8.99E-27    |
| HTR1B      | brown | -0.335944868 | 8.37E-13    | 0.590538926  | 9.05E-42    |
| WDR49      | brown | -0.192026729 | 6.13E-05    | 0.336902962  | 7.14E-13    |
| ITGA8      | brown | -0.574378619 | 4.14E-39    | 0.719969496  | 6.78E-70    |
| PIP5K1B    | brown | -0.155613612 | 0.001206997 | 0.359983796  | 1.33E-14    |
| RHOB       | brown | -0.404250266 | 2.46E-18    | 0.501306672  | 9.63E-29    |
| TMC3       | brown | -0.008671295 | 0.857708613 | 0.169739746  | 0.000407407 |
| EIF4E3     | brown | -0.283735185 | 2.10E-09    | 0.413772146  | 3.25E-19    |
| EPHX1      | brown | -0.186194129 | 0.000102845 | 0.21979821   | 4.21E-06    |
| Clorf95    | brown | -0.424259936 | 3.24E-20    | 0.736738686  | 9.63E-75    |

|            |       |              |             |              |           |
|------------|-------|--------------|-------------|--------------|-----------|
| ZFP36      | brown | -0.410945356 | 5.97E-19    | 0.405579994  | 1.86E-18  |
| TTC28      | brown | -0.236770343 | 6.83E-07    | 0.513024757  | 3.07E-30  |
| MARC2      | brown | -0.149797411 | 0.001840597 | 0.300210704  | 2.09E-10  |
| TMEM223    | brown | 0.377253164  | 5.43E-16    | -0.554150246 | 5.57E-36  |
| MAP3K12    | brown | -0.08035065  | 0.096106851 | 0.376157832  | 6.69E-16  |
| HYAL1      | brown | -0.18660173  | 9.92E-05    | 0.259335901  | 4.88E-08  |
| AIF1L      | brown | -0.142111031 | 0.003143946 | 0.210525574  | 1.07E-05  |
| METTL24    | brown | -0.519030678 | 4.97E-31    | 0.825235845  | 2.99E-108 |
| TRAK2      | brown | -0.261686374 | 3.65E-08    | 0.608993082  | 5.37E-45  |
| NECAB1     | brown | -0.434220225 | 3.36E-21    | 0.715702083  | 1.02E-68  |
| CYP46A1    | brown | -0.219077005 | 4.53E-06    | 0.505279879  | 3.04E-29  |
| MARCKS     | brown | 0.177923811  | 0.000208575 | -0.202312049 | 2.37E-05  |
| SMYD5      | brown | 0.304091257  | 1.19E-10    | -0.431425431 | 6.39E-21  |
| TMC6       | brown | 0.377578976  | 5.11E-16    | -0.450113904 | 7.71E-23  |
| SLC01C1    | brown | -0.12628053  | 0.008754671 | 0.491985705  | 1.36E-27  |
| MRPL16     | brown | 0.214548755  | 7.18E-06    | -0.43149467  | 6.29E-21  |
| CSGALNACT1 | brown | -0.439795829 | 9.14E-22    | 0.697155343  | 7.64E-64  |
| RGMA       | brown | -0.21503071  | 6.84E-06    | 0.386973784  | 8.24E-17  |
| TSEN54     | brown | 0.352416952  | 5.09E-14    | -0.553273331 | 7.53E-36  |
| DHH        | brown | -0.228924847 | 1.61E-06    | 0.612270397  | 1.36E-45  |
| PNPLA7     | brown | -0.312978604 | 3.16E-11    | 0.402299794  | 3.70E-18  |
| MYL3       | brown | -0.438743871 | 1.17E-21    | 0.582888034  | 1.72E-40  |
| TGFBR3     | brown | -0.342734877 | 2.69E-13    | 0.443113474  | 4.17E-22  |
| SS18L2     | brown | 0.287062062  | 1.33E-09    | -0.447164041 | 1.58E-22  |
| SNX9       | brown | -0.273371154 | 8.29E-09    | 0.587543284  | 2.89E-41  |
| ST3GAL3    | brown | -0.26513951  | 2.37E-08    | 0.511268885  | 5.18E-30  |
| RCCD1      | brown | 0.308184385  | 6.50E-11    | -0.426455328 | 1.98E-20  |
| EPHA6      | brown | -0.3522653   | 5.23E-14    | 0.498170432  | 2.37E-28  |
| RNF115     | brown | -0.153258737 | 0.001434383 | 0.473278359  | 2.18E-25  |
| SOCS2      | brown | -0.193648123 | 5.29E-05    | 0.269623376  | 1.34E-08  |
| ZDHC12     | brown | 0.345886701  | 1.58E-13    | -0.546456107 | 7.60E-35  |
| LA16c-306E | brown | -0.211732995 | 9.51E-06    | 0.250848951  | 1.36E-07  |
| DLL4       | brown | 0.00559898   | 0.907838097 | 0.286583179  | 1.42E-09  |
| SMG9       | brown | 0.34009965   | 4.19E-13    | -0.315614946 | 2.12E-11  |
| NAP1L3     | brown | -0.31240793  | 3.45E-11    | 0.711037101  | 1.87E-67  |
| DAAM2      | brown | -0.328549522 | 2.79E-12    | 0.763794205  | 2.12E-83  |
| TRPC1      | brown | -0.26302548  | 3.09E-08    | 0.555327887  | 3.71E-36  |
| PHKG1      | brown | -0.22082442  | 3.78E-06    | 0.620176299  | 4.66E-47  |
| LSM8       | brown | 0.3140078    | 2.71E-11    | -0.350012379 | 7.74E-14  |
| DDIT4L     | brown | -0.087656027 | 0.06938883  | 0.423100362  | 4.20E-20  |
| ABCC9      | brown | -0.370405655 | 1.98E-15    | 0.814567856  | 2.78E-103 |
| NCAM2      | brown | -0.089168756 | 0.064697633 | 0.305754474  | 9.32E-11  |
| RASL12     | brown | -0.431474787 | 6.32E-21    | 0.851982264  | 2.38E-122 |
| IL1RL2     | brown | 0.140723221  | 0.003453774 | -0.221981111 | 3.35E-06  |
| PCP4       | brown | -0.378340727 | 4.41E-16    | 0.727964506  | 3.68E-72  |
| CDKL1      | brown | -0.45769959  | 1.19E-23    | 0.507753338  | 1.47E-29  |
| YDJC       | brown | 0.408136033  | 1.09E-18    | -0.65052626  | 4.30E-53  |
| GALNT14    | brown | 0.173981991  | 0.000289019 | -0.329692899 | 2.32E-12  |
| SPATA4     | brown | -0.348205384 | 1.06E-13    | 0.513821545  | 2.41E-30  |
| NTRK3      | brown | -0.527611046 | 3.47E-32    | 0.495444503  | 5.14E-28  |
| MRPS12     | brown | 0.31707367   | 1.69E-11    | -0.525033943 | 7.78E-32  |

|            |       |              |             |              |           |
|------------|-------|--------------|-------------|--------------|-----------|
| PENK       | brown | -0.197723373 | 3.64E-05    | 0.405414985  | 1.93E-18  |
| GRPEL1     | brown | 0.108974121  | 0.023827978 | -0.372374129 | 1.37E-15  |
| CSNK1G2    | brown | 0.34557842   | 1.66E-13    | -0.472935561 | 2.39E-25  |
| MAD2L1BP   | brown | 0.212727099  | 8.61E-06    | -0.397854579 | 9.25E-18  |
| TBX4       | brown | -0.312902644 | 3.20E-11    | 0.701548477  | 5.79E-65  |
| TKT        | brown | 0.125876972  | 0.008973986 | -0.252972209 | 1.05E-07  |
| TMEM41B    | brown | 0.201144429  | 2.65E-05    | -0.313115589 | 3.10E-11  |
| CCDC149    | brown | -0.126571514 | 0.008599509 | 0.368796274  | 2.67E-15  |
| CDH19      | brown | -0.39297993  | 2.49E-17    | 0.497175285  | 3.15E-28  |
| CCM2L      | brown | -0.239370661 | 5.10E-07    | 0.521680006  | 2.20E-31  |
| HAND1      | brown | -0.398443238 | 8.20E-18    | 0.745610866  | 1.85E-77  |
| SLC52A2    | brown | 0.465188617  | 1.78E-24    | -0.579661454 | 5.80E-40  |
| MICAL1     | brown | -0.177134061 | 0.000222785 | 0.382933256  | 1.82E-16  |
| SNX21      | brown | -0.136169628 | 0.004674616 | 0.197511347  | 3.72E-05  |
| SHFM1      | brown | 0.341278655  | 3.44E-13    | -0.580089603 | 4.94E-40  |
| FAM198A    | brown | -0.100654694 | 0.036938251 | 0.331285441  | 1.79E-12  |
| PDE2A      | brown | -0.505927689 | 2.51E-29    | 0.758467122  | 1.32E-81  |
| TMEM108    | brown | -0.29273287  | 6.07E-10    | 0.599465161  | 2.64E-43  |
| MYOM1      | brown | -0.568645803 | 3.36E-38    | 0.860071397  | 3.58E-127 |
| LCMT1      | brown | 0.223137552  | 2.97E-06    | -0.312953762 | 3.18E-11  |
| FERMT2     | brown | -0.376564521 | 6.20E-16    | 0.842071564  | 8.06E-117 |
| JAM3       | brown | -0.420574862 | 7.35E-20    | 0.83673058   | 5.37E-114 |
| PPP1R12B   | brown | -0.499101492 | 1.82E-28    | 0.847997601  | 4.44E-120 |
| SNRPF      | brown | 0.338511824  | 5.47E-13    | -0.582679965 | 1.86E-40  |
| FAM46A     | brown | -0.298984535 | 2.50E-10    | 0.416987314  | 1.62E-19  |
| WDR4       | brown | 0.351815416  | 5.66E-14    | -0.387921533 | 6.83E-17  |
| MICU1      | brown | -0.052990302 | 0.27290281  | 0.265624658  | 2.23E-08  |
| PTGES3L-AA | brown | -0.273648324 | 8.00E-09    | 0.324698673  | 5.15E-12  |
| FAM134B    | brown | -0.096211074 | 0.046163481 | 0.271713122  | 1.03E-08  |
| EPAS1      | brown | -0.077053394 | 0.110592649 | 0.21373008   | 7.79E-06  |
| RGS9       | brown | -0.299856233 | 2.20E-10    | 0.517807052  | 7.22E-31  |
| CACNA1C    | brown | -0.373043162 | 1.21E-15    | 0.857748923  | 9.32E-126 |
| ANKRD29    | brown | -0.311355063 | 4.04E-11    | 0.620095896  | 4.83E-47  |
| TTL11      | brown | -0.272383593 | 9.43E-09    | 0.479048297  | 4.71E-26  |
| ATP6V0B    | brown | 0.359896149  | 1.35E-14    | -0.455300415 | 2.15E-23  |
| KIZ        | brown | -0.25231919  | 1.14E-07    | 0.234529528  | 8.75E-07  |
| ADRBK1     | brown | 0.193216575  | 5.51E-05    | -0.416735979 | 1.71E-19  |
| GSK3A      | brown | 0.263114384  | 3.06E-08    | -0.37741661  | 5.27E-16  |
| FAM109A    | brown | 0.264198745  | 2.67E-08    | -0.282185666 | 2.59E-09  |
| TPSB2      | brown | -0.330788809 | 1.94E-12    | 0.603401819  | 5.37E-44  |
| ZDHHC11B   | brown | -0.315098217 | 2.29E-11    | 0.238764354  | 5.46E-07  |
| CNFN       | brown | 0.096082766  | 0.046456266 | -0.276188593 | 5.74E-09  |
| VIT        | brown | -0.588240357 | 2.21E-41    | 0.698906841  | 2.75E-64  |
| PKIG       | brown | -0.351498228 | 5.98E-14    | 0.70523049   | 6.42E-66  |
| IMP3       | brown | 0.20692179   | 1.52E-05    | -0.553743787 | 6.41E-36  |
| LMAN2      | brown | 0.242219089  | 3.69E-07    | -0.405546088 | 1.88E-18  |
| HBB        | brown | -0.210238637 | 1.10E-05    | 0.33215698   | 1.56E-12  |
| MTMR14     | brown | 0.24562602   | 2.50E-07    | -0.281674826 | 2.77E-09  |
| TM4SF18    | brown | -0.028910537 | 0.549918965 | 0.280906049  | 3.07E-09  |
| GPR116     | brown | -0.139330605 | 0.003792264 | 0.460737043  | 5.53E-24  |
| CPA3       | brown | -0.322924715 | 6.81E-12    | 0.69073468   | 3.05E-62  |

|          |       |              |             |              |             |
|----------|-------|--------------|-------------|--------------|-------------|
| JADE1    | brown | -0.203405278 | 2.14E-05    | 0.448413777  | 1.17E-22    |
| CNGA3    | brown | -0.37034336  | 2.00E-15    | 0.49089132   | 1.85E-27    |
| TECPR2   | brown | -0.238056841 | 5.91E-07    | 0.508440076  | 1.20E-29    |
| ELOVL2   | brown | -0.114511364 | 0.017526857 | 0.401224069  | 4.62E-18    |
| EWSR1    | brown | 0.245278912  | 2.60E-07    | -0.404933571 | 2.13E-18    |
| TACR3    | brown | -0.454566908 | 2.58E-23    | 0.275027945  | 6.68E-09    |
| HUNK     | brown | -0.165207844 | 0.00058276  | 0.353738992  | 4.04E-14    |
| PYG01    | brown | -0.202211966 | 2.39E-05    | 0.477487782  | 7.15E-26    |
| MDFI     | brown | 0.203276193  | 2.16E-05    | -0.3314129   | 1.76E-12    |
| SMPD2    | brown | 0.216339314  | 5.99E-06    | -0.457992445 | 1.10E-23    |
| ABCB5    | brown | -0.475887706 | 1.09E-25    | 0.62978848   | 6.75E-49    |
| LTBP3    | brown | -0.187682169 | 9.03E-05    | 0.400563644  | 5.30E-18    |
| C2orf74  | brown | -0.13126025  | 0.006415558 | 0.266003949  | 2.13E-08    |
| ITPKB    | brown | -0.427680247 | 1.50E-20    | 0.681952382  | 4.06E-60    |
| PCDHB15  | brown | -0.193766759 | 5.24E-05    | 0.335222729  | 9.42E-13    |
| PPP1R3B  | brown | -0.282589165 | 2.45E-09    | 0.508163838  | 1.30E-29    |
| HS1BP3   | brown | -0.046348644 | 0.3376476   | 0.153643007  | 0.001394775 |
| PHACTR1  | brown | -0.211949301 | 9.30E-06    | 0.475696566  | 1.15E-25    |
| CSK      | brown | 0.288361474  | 1.11E-09    | -0.363922685 | 6.53E-15    |
| ITGA1    | brown | -0.274406115 | 7.25E-09    | 0.741205726  | 4.26E-76    |
| FAM149A  | brown | -0.331340789 | 1.78E-12    | 0.441163105  | 6.62E-22    |
| PCED1A   | brown | 0.251512604  | 1.25E-07    | -0.34630572  | 1.47E-13    |
| PER3     | brown | -0.287923201 | 1.18E-09    | 0.405000571  | 2.10E-18    |
| GABRG1   | brown | -0.269114494 | 1.44E-08    | 0.221256864  | 3.62E-06    |
| RDH16    | brown | 0.12904532   | 0.007376241 | -0.189204116 | 7.89E-05    |
| BOC      | brown | -0.361988095 | 9.27E-15    | 0.841631113  | 1.39E-116   |
| DEF6     | brown | 0.18545727   | 0.00010967  | -0.390588117 | 4.02E-17    |
| CDCP1    | brown | 0.24261406   | 3.53E-07    | -0.347728209 | 1.15E-13    |
| ARHGEF37 | brown | -0.283566118 | 2.15E-09    | 0.41173698   | 5.04E-19    |
| SCUBE1   | brown | -0.389639418 | 4.86E-17    | 0.304109049  | 1.19E-10    |
| TRIM29   | brown | 0.081179334  | 0.092715106 | -0.371836944 | 1.51E-15    |
| TEK      | brown | -0.251056043 | 1.32E-07    | 0.725244968  | 2.21E-71    |
| OSTN     | brown | -0.381095234 | 2.60E-16    | 0.55257113   | 9.58E-36    |
| TNRC6C   | brown | -0.248933876 | 1.70E-07    | 0.527569408  | 3.51E-32    |
| PRRG4    | brown | 0.095270813  | 0.048345395 | -0.314908342 | 2.36E-11    |
| TAGLN    | brown | -0.340865871 | 3.69E-13    | 0.696757553  | 9.63E-64    |
| HDHD1    | brown | 0.167182037  | 0.000499173 | -0.22409143  | 2.69E-06    |
| SAFB     | brown | 0.225298071  | 2.37E-06    | -0.429667335 | 9.55E-21    |
| AKT1S1   | brown | 0.277710058  | 4.70E-09    | -0.416888863 | 1.65E-19    |
| PRR7     | brown | 0.219071526  | 4.53E-06    | -0.387119455 | 8.01E-17    |
| BUD31    | brown | 0.289611978  | 9.38E-10    | -0.433232852 | 4.22E-21    |
| PPP1R15A | brown | -0.267724411 | 1.71E-08    | 0.141185761  | 0.003347564 |
| CHMP7    | brown | -0.138981559 | 0.003881683 | 0.222993884  | 3.02E-06    |
| EOGT     | brown | -0.171482362 | 0.000354161 | 0.334788425  | 1.01E-12    |
| NES      | brown | -0.234933131 | 8.37E-07    | 0.497252365  | 3.08E-28    |
| EML1     | brown | -0.323393872 | 6.33E-12    | 0.717534936  | 3.20E-69    |
| ABCA7    | brown | 0.16985589   | 0.000403638 | -0.233727782 | 9.55E-07    |
| PABPN1   | brown | 0.334375956  | 1.08E-12    | -0.511226518 | 5.25E-30    |
| TMEM101  | brown | 0.185644707  | 0.000107895 | -0.269759945 | 1.32E-08    |
| BNC2     | brown | -0.345720595 | 1.62E-13    | 0.811866614  | 4.47E-102   |
| SEMA3D   | brown | -0.152500502 | 0.001515581 | 0.284597883  | 1.87E-09    |



|          |       |              |             |              |             |
|----------|-------|--------------|-------------|--------------|-------------|
| SSBP3    | brown | -0.140150744 | 0.003589457 | 0.190654225  | 6.93E-05    |
| F12      | brown | 0.153051653  | 0.001456153 | -0.387217767 | 7.85E-17    |
| PPP1R14B | brown | 0.424093381  | 3.36E-20    | -0.621683305 | 2.42E-47    |
| EFHC2    | brown | -0.194755947 | 4.79E-05    | 0.249012124  | 1.68E-07    |
| HMGA1    | brown | 0.324533654  | 5.29E-12    | -0.501983874 | 7.92E-29    |
| ARHGAP1  | brown | -0.249113002 | 1.66E-07    | 0.53896535   | 9.08E-34    |
| CCL14    | brown | -0.535583359 | 2.73E-33    | 0.687581052  | 1.80E-61    |
| MRGBP    | brown | 0.387214101  | 7.86E-17    | -0.487414266 | 4.85E-27    |
| SEMA3G   | brown | -0.34868386  | 9.74E-14    | 0.644991369  | 6.10E-52    |
| GNE      | brown | -0.110457613 | 0.021972412 | 0.254258302  | 9.03E-08    |
| COX16    | brown | 0.274344811  | 7.31E-09    | -0.478436405 | 5.55E-26    |
| MPDZ     | brown | -0.270517806 | 1.20E-08    | 0.633109547  | 1.51E-49    |
| POLR3K   | brown | 0.259385422  | 4.85E-08    | -0.414670522 | 2.68E-19    |
| PSD4     | brown | 0.145933597  | 0.002416621 | -0.310353968 | 4.70E-11    |
| PID1     | brown | -0.512768424 | 3.31E-30    | 0.734471444  | 4.58E-74    |
| POPDC2   | brown | -0.405931179 | 1.73E-18    | 0.826184464  | 1.04E-108   |
| PPCS     | brown | 0.183791984  | 0.000126695 | -0.236320543 | 7.18E-07    |
| DOC2B    | brown | -0.130360275 | 0.006791483 | 0.288171878  | 1.14E-09    |
| TARSL2   | brown | -0.287758763 | 1.21E-09    | 0.444679762  | 2.87E-22    |
| LATS2    | brown | -0.306629385 | 8.19E-11    | 0.673195186  | 4.50E-58    |
| HIGD1B   | brown | -0.094345571 | 0.050576068 | 0.129333224  | 0.007244494 |
| USP51    | brown | -0.182165491 | 0.000145694 | 0.460740935  | 5.52E-24    |
| KRT17    | brown | 0.129050054  | 0.007374057 | -0.357838698 | 1.95E-14    |
| ATF3     | brown | -0.365710055 | 4.71E-15    | 0.340185279  | 4.13E-13    |
| DUS1L    | brown | 0.413161376  | 3.71E-19    | -0.655686274 | 3.45E-54    |
| MYBBP1A  | brown | 0.254608075  | 8.66E-08    | -0.377027063 | 5.67E-16    |
| TNS1     | brown | -0.451727455 | 5.20E-23    | 0.873650957  | 5.45E-136   |
| POLR1C   | brown | 0.278940042  | 3.99E-09    | -0.566613361 | 6.98E-38    |
| GFRA3    | brown | -0.323915814 | 5.83E-12    | 0.388735111  | 5.81E-17    |
| SORCS1   | brown | -0.659788703 | 4.47E-55    | 0.583469053  | 1.38E-40    |
| APOD     | brown | -0.229138164 | 1.57E-06    | 0.446947623  | 1.66E-22    |
| IL6ST    | brown | -0.328649968 | 2.74E-12    | 0.715205641  | 1.39E-68    |
| SBSPON   | brown | -0.369189904 | 2.48E-15    | 0.749788011  | 8.85E-79    |
| C17orf96 | brown | 0.183610442  | 0.000128694 | -0.385164869 | 1.18E-16    |
| C2orf40  | brown | -0.592882181 | 3.62E-42    | 0.839315975  | 2.38E-115   |
| MYPOP    | brown | 0.333152661  | 1.32E-12    | -0.412462622 | 4.31E-19    |
| C3orf36  | brown | 0.00464106   | 0.923552784 | 0.234757909  | 8.53E-07    |
| PLN      | brown | -0.390235935 | 4.31E-17    | 0.804772429  | 5.37E-99    |
| NDNF     | brown | -0.390976328 | 3.72E-17    | 0.395659227  | 1.45E-17    |
| ETHE1    | brown | 0.133028582  | 0.005730809 | -0.278980828 | 3.97E-09    |
| TMEM132C | brown | -0.629545057 | 7.53E-49    | 0.512756607  | 3.32E-30    |
| WFDC1    | brown | -0.453800446 | 3.12E-23    | 0.613483908  | 8.17E-46    |
| MRPS7    | brown | 0.262735306  | 3.21E-08    | -0.446225331 | 1.98E-22    |
| EDA      | brown | -0.167672207 | 0.00048022  | 0.241343655  | 4.08E-07    |
| POLB     | brown | 0.20360915   | 2.10E-05    | -0.327433361 | 3.33E-12    |
| SH2D3C   | brown | -0.112243384 | 0.019906024 | 0.473002543  | 2.35E-25    |
| LIN7A    | brown | -0.056864635 | 0.239319236 | 0.286193841  | 1.50E-09    |
| GABRD    | brown | 0.17433576   | 0.00028076  | -0.004073421 | 0.932879351 |
| ABHD4    | brown | 0.007816804  | 0.871602473 | 0.191733298  | 6.29E-05    |
| PNKP     | brown | 0.34875634   | 9.62E-14    | -0.511284853 | 5.16E-30    |
| FAH      | brown | 0.123146082  | 0.010590946 | -0.255601745 | 7.68E-08    |

|          |       |              |             |              |             |
|----------|-------|--------------|-------------|--------------|-------------|
| COMMD5   | brown | 0.308284048  | 6.41E-11    | -0.366875407 | 3.80E-15    |
| HK2      | brown | 0.172401063  | 0.000328773 | -0.367772462 | 3.22E-15    |
| ZBTB80S  | brown | 0.259044542  | 5.06E-08    | -0.314178961 | 2.64E-11    |
| GPR133   | brown | -0.562491081 | 3.03E-37    | 0.871517712  | 1.54E-134   |
| CHCHD7   | brown | 0.131258706  | 0.006416187 | -0.232257625 | 1.12E-06    |
| LURAP1L  | brown | -0.106264548 | 0.027568232 | 0.258214327  | 5.60E-08    |
| NAP1L5   | brown | -0.362611621 | 8.28E-15    | 0.458614897  | 9.43E-24    |
| GHR      | brown | -0.392629937 | 2.67E-17    | 0.664740112  | 3.65E-56    |
| EFNA4    | brown | 0.386073887  | 9.84E-17    | -0.501153972 | 1.01E-28    |
| ASB5     | brown | -0.520745391 | 2.94E-31    | 0.815733548  | 8.25E-104   |
| CAPG     | brown | 0.234415912  | 8.86E-07    | -0.259858126 | 4.58E-08    |
| GPR155   | brown | -0.24022625  | 4.63E-07    | 0.543610399  | 1.96E-34    |
| HAND2    | brown | -0.451715031 | 5.21E-23    | 0.811205082  | 8.78E-102   |
| KLHDC1   | brown | -0.33007341  | 2.18E-12    | 0.542351292  | 2.98E-34    |
| PLCXD3   | brown | -0.02225958  | 0.645302415 | 0.186129945  | 0.000103424 |
| SERPINI2 | brown | -0.112184064 | 0.019971851 | 0.223874447  | 2.75E-06    |
| SHISA5   | brown | 0.198268001  | 3.46E-05    | -0.319126686 | 1.23E-11    |
| GNG11    | brown | -0.350336499 | 7.32E-14    | 0.660789669  | 2.71E-55    |
| ACR      | brown | -0.178900481 | 0.000192174 | 0.330650592  | 1.99E-12    |
| TNXB     | brown | -0.605087371 | 2.69E-44    | 0.815845196  | 7.34E-104   |
| CTU1     | brown | 0.289470104  | 9.56E-10    | -0.455504547 | 2.05E-23    |
| RAMP2    | brown | -0.159800279 | 0.000882799 | 0.395938466  | 1.37E-17    |
| SMTN     | brown | -0.465225112 | 1.77E-24    | 0.702745857  | 2.84E-65    |
| S100A2   | brown | 0.074847277  | 0.121208084 | -0.32879199  | 2.68E-12    |
| MAP1A    | brown | -0.390272937 | 4.28E-17    | 0.839984775  | 1.05E-115   |
| COQ3     | brown | 0.13087352   | 0.00657475  | -0.352374393 | 5.13E-14    |
| NXPH3    | brown | -0.42173926  | 5.68E-20    | 0.728907373  | 1.96E-72    |
| CNPY2    | brown | 0.357992381  | 1.90E-14    | -0.484888982 | 9.69E-27    |
| ADAMTS8  | brown | -0.480773506 | 2.96E-26    | 0.77921424   | 7.12E-89    |
| GJB5     | brown | 0.072210928  | 0.134916746 | -0.380661713 | 2.82E-16    |
| CNTN4    | brown | -0.38109635  | 2.60E-16    | 0.590862847  | 7.98E-42    |
| MMAB     | brown | 0.164188846  | 0.000630818 | -0.350556382 | 7.04E-14    |
| PRCD     | brown | -0.241636786 | 3.95E-07    | 0.345451172  | 1.70E-13    |
| PBX3     | brown | -0.186776248 | 9.77E-05    | 0.518357526  | 6.11E-31    |
| RCE1     | brown | 0.265372747  | 2.31E-08    | -0.450847331 | 6.45E-23    |
| DMPK     | brown | -0.33183313  | 1.64E-12    | 0.496856289  | 3.45E-28    |
| C2orf71  | brown | -0.235181463 | 8.14E-07    | 0.247974516  | 1.90E-07    |
| C15orf61 | brown | 0.227929639  | 1.79E-06    | -0.300510343 | 2.00E-10    |
| NRIP2    | brown | -0.239539727 | 5.01E-07    | 0.484182196  | 1.18E-26    |
| CRY2     | brown | -0.484896744 | 9.67E-27    | 0.65107184   | 3.30E-53    |
| ARHGEF35 | brown | 0.156512276  | 0.001129343 | -0.232725931 | 1.07E-06    |
| TACSTD2  | brown | 0.224681597  | 2.53E-06    | -0.475594908 | 1.18E-25    |
| MMACHC   | brown | 0.288020223  | 1.17E-09    | -0.35095179  | 6.58E-14    |
| SORBS1   | brown | -0.445600009 | 2.30E-22    | 0.858238972  | 4.71E-126   |
| AGA      | brown | 0.137858371  | 0.004182522 | -0.186349274 | 0.00010146  |
| ABCA3    | brown | -0.095789845 | 0.047130523 | 0.351788226  | 5.68E-14    |
| SLC12A9  | brown | 0.302612985  | 1.48E-10    | -0.371523653 | 1.60E-15    |
| C10orf32 | brown | -0.219742578 | 4.23E-06    | 0.32169138   | 8.27E-12    |
| ERP29    | brown | 0.205899187  | 1.68E-05    | -0.316255888 | 1.92E-11    |
| PSENFEN  | brown | 0.275640281  | 6.17E-09    | -0.447440384 | 1.48E-22    |
| LY75     | brown | 0.100041097  | 0.038110676 | -0.225278825 | 2.37E-06    |

|            |       |              |             |              |             |
|------------|-------|--------------|-------------|--------------|-------------|
| STARD10    | brown | 0.207483397  | 1.44E-05    | -0.468264965 | 8.07E-25    |
| NCLN       | brown | 0.350661773  | 6.92E-14    | -0.509412066 | 9.00E-30    |
| ADAMTS5    | brown | -0.323395168 | 6.33E-12    | 0.607757361  | 8.96E-45    |
| BIK        | brown | 0.117791128  | 0.014526538 | -0.250825728 | 1.36E-07    |
| SFRP5      | brown | -0.292615608 | 6.17E-10    | 0.476118073  | 1.03E-25    |
| PRSS35     | brown | -0.283635599 | 2.13E-09    | 0.649138516  | 8.40E-53    |
| MYRIP      | brown | -0.387393343 | 7.58E-17    | 0.526839708  | 4.42E-32    |
| TPM2       | brown | -0.321449886 | 8.59E-12    | 0.647663873  | 1.71E-52    |
| IL17D      | brown | -0.168602299 | 0.000446084 | 0.295210759  | 4.28E-10    |
| GRB10      | brown | -0.220796417 | 3.79E-06    | 0.344026477  | 2.16E-13    |
| NACC1      | brown | 0.284855321  | 1.80E-09    | -0.511468848 | 4.88E-30    |
| FOXP2      | brown | -0.453506159 | 3.36E-23    | 0.713050059  | 5.36E-68    |
| CYB561D2   | brown | 0.259841475  | 4.59E-08    | -0.315900235 | 2.03E-11    |
| DIO3       | brown | -0.181137125 | 0.000159053 | 0.423496378  | 3.84E-20    |
| GPFR1      | brown | -0.340682848 | 3.80E-13    | 0.593297442  | 3.07E-42    |
| RERGL      | brown | -0.572736228 | 7.57E-39    | 0.610322464  | 3.08E-45    |
| FLNA       | brown | -0.320701659 | 9.65E-12    | 0.664501052  | 4.12E-56    |
| DIP2C      | brown | -0.234598495 | 8.68E-07    | 0.517512088  | 7.90E-31    |
| P2RY2      | brown | 0.147552273  | 0.002157781 | -0.294024248 | 5.06E-10    |
| GNA15      | brown | 0.135539531  | 0.004871212 | -0.414860095 | 2.57E-19    |
| FILIP1L    | brown | -0.380028465 | 3.19E-16    | 0.777102095  | 4.25E-88    |
| SNX29      | brown | -0.136839174 | 0.004473582 | 0.496781807  | 3.52E-28    |
| CCDC27     | brown | -0.402917263 | 3.25E-18    | 0.488885404  | 3.23E-27    |
| NUDT16     | brown | -0.126002006 | 0.008905519 | 0.272795491  | 8.94E-09    |
| NMUR1      | brown | -0.289105595 | 1.01E-09    | 0.486449527  | 6.32E-27    |
| MRPS26     | brown | 0.345732293  | 1.62E-13    | -0.548704388 | 3.57E-35    |
| GALNT3     | brown | 0.200393141  | 2.84E-05    | -0.31054925  | 4.57E-11    |
| MUSTN1     | brown | -0.322570686 | 7.20E-12    | 0.430161394  | 8.54E-21    |
| PHF21A     | brown | -0.137669235 | 0.004235206 | 0.384655117  | 1.30E-16    |
| ACOT8      | brown | 0.263585383  | 2.88E-08    | -0.382935677 | 1.82E-16    |
| NFIA       | brown | -0.380088449 | 3.15E-16    | 0.545748356  | 9.63E-35    |
| TBXA2R     | brown | -0.081367938 | 0.091956698 | 0.418862528  | 1.07E-19    |
| TMEM161A   | brown | 0.313498741  | 2.92E-11    | -0.481454429 | 2.47E-26    |
| CIDEC      | brown | -0.220012628 | 4.11E-06    | 0.475005131  | 1.38E-25    |
| TTL12      | brown | 0.158538481  | 0.000970849 | -0.340198412 | 4.13E-13    |
| ST6GALNAC3 | brown | -0.249297856 | 1.63E-07    | 0.511942146  | 4.24E-30    |
| C14orf180  | brown | -0.163781026 | 0.000651061 | 0.363988038  | 6.45E-15    |
| MGARP      | brown | -0.317473113 | 1.59E-11    | 0.55638221   | 2.58E-36    |
| TXNL4A     | brown | 0.22599923   | 2.20E-06    | -0.355783742 | 2.82E-14    |
| TSPO       | brown | 0.179226491  | 0.000186974 | -0.495028416 | 5.79E-28    |
| BAHCC1     | brown | -0.077435778 | 0.108829433 | 0.266210588  | 2.07E-08    |
| ABT1       | brown | 0.277873851  | 4.60E-09    | -0.484251117 | 1.15E-26    |
| PSMG3      | brown | 0.449623762  | 8.69E-23    | -0.567917723 | 4.36E-38    |
| CLU        | brown | -0.259335713 | 4.88E-08    | 0.410737283  | 6.24E-19    |
| AHDC1      | brown | -0.156078676 | 0.001166217 | 0.177220269  | 0.000221191 |
| FRMD8      | brown | 0.193455626  | 5.39E-05    | -0.330439698 | 2.06E-12    |
| ARPC3      | brown | 0.34850079   | 1.01E-13    | -0.555041645 | 4.10E-36    |
| PFDN4      | brown | 0.275554638  | 6.24E-09    | -0.430935065 | 7.15E-21    |
| WFDC10B    | brown | 0.018230923  | 0.70619191  | 0.167438605  | 0.000489167 |
| RGMB       | brown | -0.114049735 | 0.017989915 | 0.262474974  | 3.31E-08    |
| CTIF       | brown | -0.235759418 | 7.64E-07    | 0.514587314  | 1.92E-30    |

|            |       |              |             |              |             |
|------------|-------|--------------|-------------|--------------|-------------|
| KY         | brown | -0.524257937 | 9.90E-32    | 0.661013055  | 2.42E-55    |
| TRNAU1AP   | brown | 0.205224808  | 1.79E-05    | -0.300256829 | 2.08E-10    |
| COL6A5     | brown | -0.219547652 | 4.32E-06    | 0.10044645   | 0.037332673 |
| ADCK3      | brown | -0.14638745  | 0.002341328 | 0.26424221   | 2.66E-08    |
| COX7A1     | brown | -0.417552609 | 1.43E-19    | 0.699220877  | 2.28E-64    |
| CABLES1    | brown | -0.101683701 | 0.035040799 | 0.186311846  | 0.000101793 |
| SAMD1      | brown | 0.33974421   | 4.45E-13    | -0.468189818 | 8.23E-25    |
| STAB2      | brown | -0.379198921 | 3.74E-16    | 0.634574949  | 7.75E-50    |
| CCDC137    | brown | 0.405277255  | 1.98E-18    | -0.566826005 | 6.47E-38    |
| CPEB1      | brown | -0.560348284 | 6.46E-37    | 0.816979061  | 2.24E-104   |
| SLIT3      | brown | -0.48439477  | 1.11E-26    | 0.646700227  | 2.70E-52    |
| SFRP1      | brown | -0.375583875 | 7.46E-16    | 0.658713948  | 7.66E-55    |
| KCNAB1     | brown | -0.336243099 | 7.96E-13    | 0.618328583  | 1.04E-46    |
| PKDCC      | brown | -0.331098985 | 1.85E-12    | 0.727152704  | 6.30E-72    |
| CCDC74A    | brown | -0.025338506 | 0.600288893 | 0.208527856  | 1.30E-05    |
| FAM50B     | brown | -0.218879363 | 4.62E-06    | 0.274613537  | 7.06E-09    |
| HTR2B      | brown | -0.164708503 | 0.000605868 | 0.467991053  | 8.66E-25    |
| RNF150     | brown | -0.476643532 | 8.96E-26    | 0.800702746  | 2.75E-97    |
| TMEM8B     | brown | -0.275612103 | 6.19E-09    | 0.282750614  | 2.40E-09    |
| INO80C     | brown | 0.166622582  | 0.000521652 | -0.416416637 | 1.83E-19    |
| SSPN       | brown | -0.349137508 | 9.01E-14    | 0.57995849   | 5.19E-40    |
| OTC        | brown | -0.313060273 | 3.13E-11    | 0.470993969  | 3.97E-25    |
| HBD        | brown | 0.014232386  | 0.768540232 | 0.16036344   | 0.000845933 |
| COQ4       | brown | 0.206030354  | 1.66E-05    | -0.493016657 | 1.02E-27    |
| SF3A2      | brown | 0.275304091  | 6.45E-09    | -0.415549814 | 2.21E-19    |
| TOP1MT     | brown | 0.20031876   | 2.86E-05    | -0.411601515 | 5.19E-19    |
| R3HDM4     | brown | 0.159414051  | 0.000908934 | -0.378436237 | 4.33E-16    |
| BLOC1S4    | brown | 0.262299166  | 3.38E-08    | -0.426547428 | 1.94E-20    |
| FAM229B    | brown | -0.233818554 | 9.46E-07    | 0.411774571  | 5.00E-19    |
| OGN        | brown | -0.560890738 | 5.34E-37    | 0.850222191  | 2.44E-121   |
| MOGS       | brown | 0.485860603  | 7.43E-27    | -0.589311213 | 1.46E-41    |
| SPSB2      | brown | 0.253037425  | 1.05E-07    | -0.324842386 | 5.03E-12    |
| OSBPL10    | brown | -0.341631982 | 3.24E-13    | 0.647808376  | 1.59E-52    |
| F8         | brown | -0.351075237 | 6.44E-14    | 0.68586521   | 4.69E-61    |
| TLE4       | brown | -0.245338751 | 2.58E-07    | 0.330025641  | 2.20E-12    |
| RRP1       | brown | 0.295883772  | 3.89E-10    | -0.522790851 | 1.56E-31    |
| SAMD11     | brown | -0.191183397 | 6.61E-05    | 0.29216626   | 6.57E-10    |
| GOT1L1     | brown | -0.090490056 | 0.060816444 | 0.214757353  | 7.03E-06    |
| PFDN6      | brown | 0.364590444  | 5.78E-15    | -0.58935672  | 1.43E-41    |
| C4B        | brown | -0.197930501 | 3.57E-05    | 0.633182932  | 1.46E-49    |
| ADCYAP1    | brown | -0.357917348 | 1.93E-14    | 0.62343724   | 1.13E-47    |
| APRT       | brown | 0.272810503  | 8.92E-09    | -0.524314409 | 9.73E-32    |
| FAM131C    | brown | 0.137747058  | 0.004213456 | -0.250607787 | 1.40E-07    |
| CTD-2369P2 | brown | 0.17203047   | 0.000338803 | -0.220268662 | 4.01E-06    |
| MREG       | brown | 0.262855809  | 3.16E-08    | -0.353548195 | 4.18E-14    |
| ODF3L1     | brown | -0.481355645 | 2.53E-26    | 0.351190438  | 6.31E-14    |
| ARF5       | brown | 0.278417602  | 4.28E-09    | -0.513761321 | 2.46E-30    |
| ARL14EP    | brown | -0.161383917 | 0.000782733 | 0.318533515  | 1.35E-11    |
| GPX3       | brown | -0.241704435 | 3.92E-07    | 0.442792976  | 4.50E-22    |
| RAB23      | brown | -0.360624683 | 1.19E-14    | 0.797536132  | 5.53E-96    |
| RASD1      | brown | -0.306367423 | 8.51E-11    | 0.395606805  | 1.46E-17    |

|          |       |              |             |              |             |
|----------|-------|--------------|-------------|--------------|-------------|
| SH3BGRL  | brown | -0.261238807 | 3.86E-08    | 0.512447358  | 3.65E-30    |
| SSUH2    | brown | -0.071152515 | 0.140744942 | 0.272118767  | 9.76E-09    |
| NSDHL    | brown | 0.255354962  | 7.92E-08    | -0.474820941 | 1.45E-25    |
| PIEZ02   | brown | -0.174109063 | 0.000286026 | 0.50283061   | 6.20E-29    |
| KLHL38   | brown | -0.176573407 | 0.000233418 | 0.58143366   | 2.98E-40    |
| MRPL17   | brown | 0.357631032  | 2.03E-14    | -0.501303142 | 9.64E-29    |
| CWC15    | brown | 0.232299835  | 1.12E-06    | -0.394107267 | 1.98E-17    |
| HPSE2    | brown | -0.464983242 | 1.88E-24    | 0.816185029  | 5.15E-104   |
| GPBAR1   | brown | -0.371996215 | 1.47E-15    | 0.680646821  | 8.28E-60    |
| LHX6     | brown | -0.125773664 | 0.009030909 | 0.431966018  | 5.65E-21    |
| REEP1    | brown | -0.447294125 | 1.53E-22    | 0.723329232  | 7.74E-71    |
| TMEM100  | brown | -0.454118289 | 2.89E-23    | 0.750590232  | 4.91E-79    |
| MTFP1    | brown | 0.274172357  | 7.47E-09    | -0.472553671 | 2.64E-25    |
| SEZ6L2   | brown | 0.16714679   | 0.000500562 | -0.17654151  | 0.000234037 |
| IPO4     | brown | 0.246939271  | 2.15E-07    | -0.384866425 | 1.25E-16    |
| RFTN2    | brown | -0.264592486 | 2.54E-08    | 0.628953088  | 9.82E-49    |
| RPS6KA1  | brown | 0.297542317  | 3.07E-10    | -0.439572285 | 9.64E-22    |
| PIPOX    | brown | -0.25630454  | 7.06E-08    | 0.4576448    | 1.20E-23    |
| HMCN2    | brown | -0.503627248 | 4.92E-29    | 0.767861734  | 8.39E-85    |
| ANO5     | brown | -0.336439534 | 7.71E-13    | 0.575901218  | 2.36E-39    |
| SMAD9    | brown | -0.281308815 | 2.91E-09    | 0.463741948  | 2.58E-24    |
| CCDC58   | brown | 0.396272265  | 1.28E-17    | -0.632340913 | 2.14E-49    |
| CYP21A2  | brown | -0.142548707 | 0.003051606 | 0.501506388  | 9.09E-29    |
| MEX3D    | brown | 0.278007184  | 4.52E-09    | -0.336487539 | 7.65E-13    |
| LETM1    | brown | 0.229022389  | 1.59E-06    | -0.409939924 | 7.40E-19    |
| TSC22D1  | brown | -0.367557481 | 3.35E-15    | 0.504991492  | 3.31E-29    |
| GJC2     | brown | -0.383635009 | 1.59E-16    | 0.558908749  | 1.07E-36    |
| CLEC4F   | brown | -0.132083566 | 0.006088109 | 0.218330984  | 4.89E-06    |
| CYB561   | brown | 0.39308334   | 2.44E-17    | -0.483845466 | 1.29E-26    |
| MRPL48   | brown | 0.245408128  | 2.56E-07    | -0.458076407 | 1.08E-23    |
| NOC2L    | brown | 0.28174987   | 2.74E-09    | -0.478145737 | 6.00E-26    |
| CEP131   | brown | 0.328697818  | 2.72E-12    | -0.403818031 | 2.69E-18    |
| CYB5R2   | brown | 0.191958739  | 6.17E-05    | -0.388435988 | 6.17E-17    |
| TBX20    | brown | -0.457911883 | 1.12E-23    | 0.705071322  | 7.06E-66    |
| LGI1     | brown | -0.346033965 | 1.54E-13    | 0.338793089  | 5.22E-13    |
| P2RY14   | brown | -0.480377791 | 3.30E-26    | 0.804367377  | 7.98E-99    |
| MMRN1    | brown | -0.434227763 | 3.35E-21    | 0.705879682  | 4.34E-66    |
| C19orf52 | brown | 0.303984988  | 1.21E-10    | -0.349329176 | 8.72E-14    |
| SLC1A5   | brown | 0.090293341  | 0.061381794 | -0.280116971 | 3.41E-09    |
| TAL1     | brown | -0.176057813 | 0.000243613 | 0.452969095  | 3.83E-23    |
| NR4A2    | brown | -0.454749447 | 2.47E-23    | 0.405517271  | 1.89E-18    |
| FOXJ2    | brown | -0.137874791 | 0.004177976 | 0.367134624  | 3.62E-15    |
| RYR3     | brown | -0.57844755  | 9.15E-40    | 0.723551226  | 6.70E-71    |
| GPR112   | brown | -0.592692556 | 3.90E-42    | 0.506582481  | 2.07E-29    |
| ITPA     | brown | 0.358986748  | 1.59E-14    | -0.516111103 | 1.21E-30    |
| GFRA2    | brown | -0.393325954 | 2.32E-17    | 0.663799906  | 5.89E-56    |
| GATA1    | brown | -0.276874468 | 5.24E-09    | 0.48082481   | 2.92E-26    |
| FUNDC1   | brown | 0.205205185  | 1.80E-05    | -0.375353312 | 7.80E-16    |
| STK11IP  | brown | 0.15090302   | 0.001700634 | -0.2220046   | 3.35E-06    |
| APITD1   | brown | 0.297657308  | 3.02E-10    | -0.441983068 | 5.45E-22    |
| GYPE     | brown | -0.293495714 | 5.45E-10    | 0.616674451  | 2.10E-46    |

|            |       |              |             |              |           |
|------------|-------|--------------|-------------|--------------|-----------|
| NCS1       | brown | -0.31343566  | 2.95E-11    | 0.471910166  | 3.12E-25  |
| IGSF9B     | brown | -0.479127731 | 4.61E-26    | 0.716431915  | 6.44E-69  |
| IRS2       | brown | -0.085283498 | 0.077303947 | 0.334947739  | 9.86E-13  |
| CTSF       | brown | -0.217419328 | 5.37E-06    | 0.369285442  | 2.43E-15  |
| AKAP2      | brown | -0.396365995 | 1.25E-17    | 0.693567432  | 6.07E-63  |
| ITGB3      | brown | -0.290468148 | 8.33E-10    | 0.664159647  | 4.90E-56  |
| LMOD1      | brown | -0.454570491 | 2.58E-23    | 0.817005595  | 2.17E-104 |
| ADCY9      | brown | -0.284007504 | 2.02E-09    | 0.607847578  | 8.63E-45  |
| C17orf70   | brown | 0.312886827  | 3.21E-11    | -0.406215176 | 1.63E-18  |
| AOC3       | brown | -0.429424958 | 1.01E-20    | 0.781850589  | 7.45E-90  |
| ESD        | brown | -0.167730669 | 0.000478005 | 0.313734079  | 2.82E-11  |
| PCOLCE2    | brown | -0.493541035 | 8.80E-28    | 0.6452548    | 5.38E-52  |
| TIE1       | brown | -0.189259687 | 7.85E-05    | 0.600691993  | 1.61E-43  |
| SOD3       | brown | -0.293465028 | 5.48E-10    | 0.592184754  | 4.76E-42  |
| CLEC1A     | brown | -0.167829045 | 0.000474299 | 0.413779327  | 3.24E-19  |
| STARD8     | brown | -0.280635285 | 3.18E-09    | 0.744619221  | 3.76E-77  |
| ZNF853     | brown | -0.167347873 | 0.000492684 | 0.283219691  | 2.25E-09  |
| ZHX1-C8orf | brown | 0.291460265  | 7.25E-10    | -0.375415255 | 7.71E-16  |
| SPINT1     | brown | 0.338769705  | 5.24E-13    | -0.510890697 | 5.80E-30  |
| FAM102A    | brown | -0.194371722 | 4.96E-05    | 0.23526697   | 8.06E-07  |
| PDCD5      | brown | 0.332058955  | 1.58E-12    | -0.443242987 | 4.04E-22  |
| CYSRT1     | brown | 0.065440273  | 0.175576731 | -0.25569454  | 7.60E-08  |
| MAPT       | brown | -0.306055178 | 8.92E-11    | 0.46942172   | 5.98E-25  |
| GLP2R      | brown | -0.620788852 | 3.58E-47    | 0.79321436   | 3.05E-94  |
| TSC22D4    | brown | 0.242050654  | 3.77E-07    | -0.366169528 | 4.33E-15  |
| FZD7       | brown | -0.351119836 | 6.39E-14    | 0.573356205  | 6.03E-39  |
| SLC35C2    | brown | 0.346817183  | 1.34E-13    | -0.472056851 | 3.01E-25  |
| CPED1      | brown | -0.520938797 | 2.77E-31    | 0.847134753  | 1.35E-119 |
| TPSAB1     | brown | -0.345665624 | 1.64E-13    | 0.612922006  | 1.04E-45  |
| SELP       | brown | -0.269329446 | 1.40E-08    | 0.535907726  | 2.45E-33  |
| OCIAD2     | brown | 0.360542464  | 1.20E-14    | -0.61795163  | 1.22E-46  |
| BOLA1      | brown | 0.259203437  | 4.96E-08    | -0.313836922 | 2.78E-11  |
| ST8SIA6    | brown | -0.11855167  | 0.013898957 | 0.324165103  | 5.60E-12  |
| FAM83G     | brown | 0.13534931   | 0.004932011 | -0.309667524 | 5.21E-11  |
| POP7       | brown | 0.405494019  | 1.90E-18    | -0.585314965 | 6.81E-41  |
| FBXW9      | brown | 0.367086629  | 3.66E-15    | -0.470614288 | 4.38E-25  |
| FOXF1      | brown | -0.483210586 | 1.53E-26    | 0.751292932  | 2.92E-79  |
| ATPAF2     | brown | 0.169105991  | 0.000428554 | -0.270603772 | 1.19E-08  |
| DUSP19     | brown | -0.238592389 | 5.57E-07    | 0.404741481  | 2.22E-18  |
| CNDP2      | brown | 0.166411466  | 0.000530376 | -0.245558743 | 2.52E-07  |

| MEgreen      | MEgreen     | MEyellow     | MEyellow    | MEagenta     |
|--------------|-------------|--------------|-------------|--------------|
| -0.322832941 | 6.91E-12    | -0.120848392 | 0.012146183 | 0.068486495  |
| -0.271229496 | 1.09E-08    | -0.307545312 | 7.15E-11    | 0.009240594  |
| -0.216474287 | 5.91E-06    | -0.038112094 | 0.430524084 | 0.052456588  |
| -0.009434212 | 0.845340596 | -0.012941243 | 0.789018488 | -0.021921574 |
| 0.211414587  | 9.81E-06    | 0.094356353  | 0.050549588 | 0.01463407   |
| -0.240835349 | 4.32E-07    | -0.114782222 | 0.017260037 | 0.018677967  |
| 0.046333324  | 0.337807485 | 0.123319487  | 0.010481073 | -0.023764898 |
| -0.188158928 | 8.65E-05    | -0.0017816   | 0.970615352 | 0.096179583  |
| -0.252683734 | 1.09E-07    | -0.229059707 | 1.59E-06    | -0.02433345  |
| 0.07625775   | 0.114333469 | -0.050597557 | 0.295178096 | 0.056420876  |
| 0.229897272  | 1.45E-06    | 0.125558686  | 0.009150395 | -0.053942549 |
| -0.128704793 | 0.007534829 | -0.164545371 | 0.0006136   | -0.102486411 |
| -0.287925166 | 1.18E-09    | -0.065396247 | 0.175868066 | 0.122492472  |
| 0.710493101  | 2.61E-67    | 0.413748115  | 3.27E-19    | -0.081699723 |
| -0.232095006 | 1.14E-06    | -0.251384854 | 1.27E-07    | 0.017726118  |
| -0.13142108  | 0.006350378 | -0.154048583 | 0.001354064 | 0.072756592  |
| -0.010506475 | 0.828022317 | 0.155432424  | 0.001223237 | -0.03657866  |
| 0.493113027  | 9.93E-28    | 0.217649134  | 5.24E-06    | -0.04684731  |
| -0.502767431 | 6.31E-29    | -0.311330595 | 4.06E-11    | 0.173952563  |
| 0.445666179  | 2.26E-22    | 0.184141504  | 0.000122928 | -0.023938347 |
| -0.152509793 | 0.001514562 | -0.196614013 | 4.04E-05    | 0.066671613  |
| 0.222412081  | 3.21E-06    | 0.064805325  | 0.1798132   | 0.009887261  |
| 0.504984068  | 3.31E-29    | 0.299317204  | 2.38E-10    | -0.025735992 |
| 0.228620467  | 1.66E-06    | 0.156416366  | 0.001137406 | 0.022000845  |
| 0.482998343  | 1.62E-26    | 0.433291471  | 4.16E-21    | -0.043627965 |
| -0.348547047 | 9.98E-14    | -0.218759105 | 4.68E-06    | 0.045410573  |
| -0.119270535 | 0.013327823 | -0.033071911 | 0.493984889 | 0.033275143  |
| -0.230864229 | 1.31E-06    | -0.183571666 | 0.000129125 | 0.058175495  |
| -0.321409354 | 8.64E-12    | -0.134644319 | 0.00516335  | 0.090609735  |
| 0.153676385  | 0.001391383 | 0.082188696  | 0.088713959 | 0.035372602  |
| -0.240101562 | 4.70E-07    | -0.188704918 | 8.25E-05    | -0.038907097 |
| -0.298010983 | 2.87E-10    | -0.259389317 | 4.85E-08    | 0.0289364    |
| 0.28524579   | 1.71E-09    | 0.277632441  | 4.75E-09    | 0.006706751  |
| -0.244432689 | 2.87E-07    | -0.114013479 | 0.018026731 | -0.016488578 |
| -0.295853503 | 3.91E-10    | -0.119804016 | 0.012917441 | 0.029332175  |
| -0.016607626 | 0.731294333 | -0.147787111 | 0.002122408 | 0.139718233  |
| -0.082355009 | 0.088068196 | 0.019328313  | 0.689398791 | 0.024414191  |
| -0.206761457 | 1.55E-05    | 0.012641766  | 0.793789756 | 0.050527586  |
| 0.248141014  | 1.86E-07    | 0.095231532  | 0.048438395 | -0.002567901 |
| 0.046716998  | 0.333817981 | -0.094669026 | 0.049786673 | 0.081819754  |
| -0.119777346 | 0.012937689 | -0.04919726  | 0.308762112 | -0.090022227 |
| 0.357900817  | 1.93E-14    | 0.235522113  | 7.84E-07    | -0.000657491 |
| 0.66381447   | 5.85E-56    | 0.473443073  | 2.09E-25    | -0.061294703 |
| 0.211126545  | 1.01E-05    | 0.025308708  | 0.600717694 | 0.009789641  |
| -0.188110897 | 8.69E-05    | -0.084696978 | 0.079369699 | -0.021420886 |
| 0.3546618    | 3.43E-14    | 0.092719725  | 0.054703873 | -0.003412436 |
| 0.295650466  | 4.02E-10    | 0.193506602  | 5.36E-05    | 0.011171559  |
| 0.340787033  | 3.74E-13    | 0.157095653  | 0.001081425 | 0.060547204  |
| 0.054696232  | 0.257739119 | 0.039577274  | 0.413001166 | 0.130341183  |
| 0.532189386  | 8.11E-33    | 0.394055246  | 2.00E-17    | 0.087722367  |

|              |             |              |             |              |
|--------------|-------------|--------------|-------------|--------------|
| 0.5707107    | 1.59E-38    | 0.292719374  | 6.08E-10    | -0.064504951 |
| 0.345204621  | 1.77E-13    | 0.149975254  | 0.001817394 | -0.021996815 |
| -0.339785702 | 4.42E-13    | -0.194145372 | 5.06E-05    | 0.123141424  |
| 0.287728475  | 1.22E-09    | 0.124658313  | 0.00966624  | -0.067380252 |
| 0.23547134   | 7.88E-07    | 0.117526873  | 0.01475035  | -0.101039509 |
| 0.424173458  | 3.30E-20    | 0.296264089  | 3.69E-10    | -0.021506835 |
| -0.258163886 | 5.63E-08    | -0.046536212 | 0.335694034 | 0.097174831  |
| -0.478972137 | 4.81E-26    | -0.35566843  | 2.87E-14    | -0.046490774 |
| 0.195969055  | 4.28E-05    | 0.019043664  | 0.693740488 | 0.001007067  |
| 0.194563391  | 4.87E-05    | 0.166880447  | 0.000511176 | 0.085018743  |
| -0.054018139 | 0.263695326 | 0.105510469  | 0.028694925 | -0.006628497 |
| 0.279234029  | 3.84E-09    | 0.082576258  | 0.087214988 | 0.084208678  |
| 0.103855949  | 0.031306149 | -0.058349856 | 0.227249154 | 0.078174507  |
| 0.164122574  | 0.000634067 | -0.020307428 | 0.674542937 | -0.00585566  |
| -0.030276959 | 0.53121499  | -0.052098267 | 0.281069417 | 0.093211267  |
| 0.430650595  | 7.63E-21    | 0.179417904  | 0.000183983 | -0.037673265 |
| 0.389664965  | 4.83E-17    | 0.209804314  | 1.15E-05    | -0.055903261 |
| -0.308503263 | 6.20E-11    | -0.001898993 | 0.968680094 | 0.121394964  |
| 0.4850381    | 9.30E-27    | 0.289335288  | 9.74E-10    | -0.043752672 |
| 0.614235946  | 5.94E-46    | 0.360918243  | 1.13E-14    | -0.038588255 |
| 0.59858711   | 3.76E-43    | 0.394790594  | 1.73E-17    | -0.104867465 |
| -0.095750339 | 0.047222085 | -0.245532052 | 2.53E-07    | -0.019290945 |
| 0.269817047  | 1.31E-08    | 0.073625275  | 0.127420925 | -0.007627031 |
| 0.272195945  | 9.66E-09    | 0.034295824  | 0.478130943 | -0.040408752 |
| -0.302628633 | 1.47E-10    | -0.128286638 | 0.007733734 | 0.047617171  |
| 0.417021003  | 1.60E-19    | 0.222240125  | 3.27E-06    | -0.019343157 |
| 0.415571959  | 2.20E-19    | 0.211741277  | 9.50E-06    | -0.010612202 |
| 0.061794312  | 0.200936982 | -0.085694195 | 0.0758836   | -0.005301392 |
| 0.400637962  | 5.22E-18    | 0.225433914  | 2.34E-06    | -0.001614994 |
| 0.327398975  | 3.35E-12    | 0.191055878  | 6.69E-05    | -0.001404805 |
| -0.022438035 | 0.642655611 | 0.029348079  | 0.543894721 | 0.115722463  |
| 0.038749947  | 0.422843363 | 0.04449514   | 0.35734235  | 0.014690293  |
| 0.452233518  | 4.59E-23    | 0.24220462   | 3.70E-07    | 0.005437479  |
| 0.330821963  | 1.93E-12    | 0.189117864  | 7.95E-05    | 0.022035656  |
| 0.332646229  | 1.44E-12    | 0.073121742  | 0.130051663 | -0.040628564 |
| 0.491586472  | 1.52E-27    | 0.358946672  | 1.60E-14    | -0.069832484 |
| 0.247596915  | 1.99E-07    | 0.208789306  | 1.27E-05    | 0.016337888  |
| 0.727425796  | 5.25E-72    | 0.489456783  | 2.75E-27    | -0.079074425 |
| 0.230886435  | 1.30E-06    | 0.239137475  | 5.24E-07    | 0.061643383  |
| 0.366100428  | 4.38E-15    | 0.156049429  | 0.001168744 | 0.017901392  |
| -0.262800132 | 3.18E-08    | -0.142429892 | 0.003076426 | 0.084003149  |
| -0.281278811 | 2.92E-09    | -0.121258642 | 0.011854526 | -0.049322137 |
| 0.597723708  | 5.31E-43    | 0.428207107  | 1.33E-20    | -0.107865687 |
| 0.75981339   | 4.70E-82    | 0.487338636  | 4.95E-27    | -0.060893703 |
| -0.076552417 | 0.112936649 | 0.131176039  | 0.006449925 | 0.008182924  |
| 0.363877355  | 6.58E-15    | 0.071694711  | 0.137735665 | -0.041827055 |
| 0.238600109  | 5.56E-07    | 0.173176017  | 0.000308689 | -0.091229497 |
| 0.487180169  | 5.17E-27    | 0.268408009  | 1.57E-08    | 0.026879974  |
| 0.293082513  | 5.78E-10    | 0.120041914  | 0.012738057 | -0.011008344 |
| -0.201546772 | 2.55E-05    | 0.023266208  | 0.630431838 | -0.000689215 |
| -0.113815008 | 0.018229437 | 0.044776398  | 0.354308261 | 0.00887089   |



|              |             |              |             |              |
|--------------|-------------|--------------|-------------|--------------|
| 0.167627646  | 0.000481915 | -0.090047844 | 0.062093419 | 0.008885955  |
| -0.161371961 | 0.000783448 | -0.175355837 | 0.000258163 | 0.00035581   |
| 0.023933005  | 0.620662498 | -0.094133097 | 0.051100279 | 0.002899414  |
| 0.122857272  | 0.010776208 | 0.046374034  | 0.337382732 | 0.062257607  |
| -0.123292256 | 0.01049826  | -0.081101804 | 0.093028311 | 0.020188064  |
| -0.151477269 | 0.001631853 | 0.001668541  | 0.972479307 | 0.046685359  |
| 0.348229322  | 1.05E-13    | 0.26850254   | 1.55E-08    | 0.035710667  |
| -0.246086867 | 2.37E-07    | -0.158615639 | 0.00096524  | 0.022564634  |
| 0.510792331  | 5.97E-30    | 0.223421014  | 2.89E-06    | -0.016469968 |
| 0.317146094  | 1.67E-11    | 0.357916778  | 1.93E-14    | -0.059214706 |
| -0.407328753 | 1.29E-18    | -0.274350476 | 7.30E-09    | 0.024897852  |
| 0.366091733  | 4.39E-15    | 0.230672226  | 1.33E-06    | 0.022929809  |
| 0.333794059  | 1.19E-12    | 0.183056041  | 0.000134984 | 0.010344071  |
| -0.423242958 | 4.06E-20    | -0.218846798 | 4.64E-06    | 0.031973873  |
| -0.63826028  | 1.43E-50    | -0.404527828 | 2.32E-18    | 0.124076001  |
| 0.306065029  | 8.90E-11    | 0.141945241  | 0.003179581 | 0.024077565  |
| -0.235736393 | 7.66E-07    | -0.126088566 | 0.008858392 | 0.014466119  |
| 0.30584766   | 9.19E-11    | 0.133534259  | 0.005547461 | -0.04277381  |
| 0.276565886  | 5.46E-09    | 0.115035338  | 0.01701391  | -0.065764546 |
| 0.364507863  | 5.87E-15    | 0.331981901  | 1.60E-12    | -0.008789143 |
| 0.284289518  | 1.95E-09    | 0.064941775  | 0.178896461 | -0.0319381   |
| 0.258802922  | 5.21E-08    | 0.287160257  | 1.31E-09    | -0.03443556  |
| 0.501121455  | 1.02E-28    | 0.263681289  | 2.85E-08    | -0.02891611  |
| 0.303000928  | 1.40E-10    | 0.122853185  | 0.01077885  | 0.183527547  |
| 0.523970511  | 1.08E-31    | 0.38519341   | 1.17E-16    | -0.060486663 |
| 0.046351635  | 0.337616392 | 0.078346727  | 0.104718195 | -0.011106281 |
| 0.097758365  | 0.042752997 | 0.050721106  | 0.293999015 | -0.008482957 |
| 0.755657342  | 1.12E-80    | 0.498342541  | 2.26E-28    | -0.073713617 |
| 0.203953192  | 2.03E-05    | 0.197502861  | 3.72E-05    | 0.079756546  |
| 0.155117719  | 0.001251923 | -0.082232671 | 0.088542846 | 0.053713344  |
| -0.582691222 | 1.85E-40    | -0.287738958 | 1.21E-09    | 0.069950526  |
| -0.248719135 | 1.74E-07    | -0.025916639 | 0.591996883 | 0.07826603   |
| -0.304394817 | 1.14E-10    | -0.058652748 | 0.224841655 | 0.12261815   |
| -0.141691726 | 0.003234783 | -0.062105902 | 0.198670814 | 0.030391462  |
| 0.05021497   | 0.298849265 | 0.07071074   | 0.143233902 | -0.01565012  |
| 0.381000681  | 2.65E-16    | 0.205505155  | 1.75E-05    | -0.01369422  |
| -0.413279244 | 3.61E-19    | -0.247640315 | 1.98E-07    | 0.009180755  |
| -0.278801453 | 4.06E-09    | -0.100845916 | 0.03657919  | 0.011696738  |
| 0.335648973  | 8.78E-13    | 0.188548651  | 8.36E-05    | 0.002312213  |
| 0.400238065  | 5.66E-18    | 0.381197622  | 2.55E-16    | 0.041237016  |
| -0.520520432 | 3.15E-31    | -0.307319152 | 7.40E-11    | 0.045158066  |
| 0.441640481  | 5.91E-22    | 0.211109942  | 1.01E-05    | -0.112228996 |
| 0.137810002  | 0.004195938 | 0.09599696   | 0.046652935 | -0.034298279 |
| -0.276844052 | 5.27E-09    | -0.072694639 | 0.132315854 | 0.087678539  |
| -0.064970938 | 0.178700978 | -0.062335733 | 0.197011236 | 0.003780211  |
| 0.535552968  | 2.75E-33    | 0.355425901  | 3.00E-14    | 0.015255321  |
| -0.194505231 | 4.90E-05    | -0.073270557 | 0.129269836 | 0.016688698  |
| -0.238745859 | 5.47E-07    | -0.060145107 | 0.213244943 | 0.091801099  |
| 0.35700703   | 2.27E-14    | 0.339816343  | 4.40E-13    | -0.030142844 |
| -0.418460107 | 1.17E-19    | -0.184988799 | 0.000114228 | 0.033306065  |
| 0.218813169  | 4.65E-06    | 0.126547595  | 0.008612171 | -0.004149382 |

|              |             |              |             |              |
|--------------|-------------|--------------|-------------|--------------|
| 0.041703     | 0.388340992 | -0.052010839 | 0.281878621 | 0.024636149  |
| 0.407099486  | 1.35E-18    | 0.314997242  | 2.33E-11    | 0.011568485  |
| -0.47936931  | 4.32E-26    | -0.245115366 | 2.65E-07    | 0.156744113  |
| -0.350946435 | 6.58E-14    | -0.208203972 | 1.35E-05    | 0.068173048  |
| 0.085742996  | 0.075716247 | 0.012763906  | 0.79184287  | 0.058950646  |
| -0.322707325 | 7.05E-12    | -0.243637511 | 3.14E-07    | 0.010334666  |
| -0.307364502 | 7.35E-11    | -0.240104816 | 4.70E-07    | -0.029260399 |
| 0.44624129   | 1.97E-22    | 0.224721632  | 2.52E-06    | -0.01537473  |
| 0.478481518  | 5.48E-26    | 0.22033645   | 3.98E-06    | -0.020528291 |
| 0.207589611  | 1.43E-05    | 0.109201314  | 0.023535304 | -0.005431381 |
| -0.102377422 | 0.033808935 | -0.053060204 | 0.272269761 | -0.021606784 |
| 0.612872967  | 1.06E-45    | 0.364234436  | 6.17E-15    | -0.028009025 |
| -0.009750694 | 0.840220905 | -0.042890349 | 0.374964434 | 0.008306056  |
| 0.009397157  | 0.845940462 | 0.141233146  | 0.003336852 | -0.016039231 |
| 0.252261188  | 1.15E-07    | 0.143119038  | 0.002934978 | 0.110606953  |
| -0.498536974 | 2.13E-28    | -0.256422757 | 6.96E-08    | 0.127706109  |
| -0.281935894 | 2.67E-09    | -0.160649211 | 0.000827775 | -0.027172311 |
| -0.225781144 | 2.25E-06    | -0.110906421 | 0.021436311 | -0.00248351  |
| 0.476507718  | 9.28E-26    | 0.190621948  | 6.95E-05    | 0.061881235  |
| 0.27776616   | 4.66E-09    | 0.079017342  | 0.101770903 | -0.027781398 |
| -0.240304967 | 4.59E-07    | -0.186291615 | 0.000101973 | 0.01682685   |
| 0.255932301  | 7.38E-08    | 0.341092372  | 3.55E-13    | -0.045489227 |
| 0.504268423  | 4.08E-29    | 0.420865712  | 6.89E-20    | -0.007426129 |
| 0.657624224  | 1.32E-54    | 0.482780876  | 1.72E-26    | -0.086343636 |
| 0.482085676  | 2.08E-26    | 0.465168469  | 1.79E-24    | -0.066547407 |
| 0.35593133   | 2.74E-14    | 0.205680708  | 1.72E-05    | -0.046907422 |
| 0.280845243  | 3.10E-09    | 0.091618956  | 0.057654586 | -0.010161609 |
| -0.308117454 | 6.57E-11    | -0.205334037 | 1.78E-05    | -0.010294411 |
| -0.311184101 | 4.15E-11    | -0.140262355 | 0.003562631 | 0.09531068   |
| 0.263429308  | 2.94E-08    | 0.145532517  | 0.00248499  | -0.01920289  |
| 0.439901812  | 8.92E-22    | 0.222265427  | 3.26E-06    | -0.044341653 |
| 0.435106394  | 2.74E-21    | 0.198947311  | 3.25E-05    | -0.015876336 |
| 0.039407537  | 0.415009309 | -0.098953894 | 0.040265499 | -0.003180753 |
| -0.273926572 | 7.72E-09    | -0.063918337 | 0.185857403 | 0.04314182   |
| -0.178468043 | 0.000199281 | -0.157848298 | 0.001022372 | 0.014628505  |
| 0.251244755  | 1.29E-07    | 0.061539773  | 0.202802131 | -0.061332501 |
| 0.604864414  | 2.95E-44    | 0.452725403  | 4.07E-23    | -0.076200804 |
| 0.536782029  | 1.85E-33    | 0.312148323  | 3.59E-11    | -0.102707101 |
| 0.355563284  | 2.93E-14    | 0.180363725  | 0.000169848 | 0.020201308  |
| 0.4279907    | 1.40E-20    | 0.289466712  | 9.57E-10    | 0.019864067  |
| 0.222237703  | 3.27E-06    | 0.119947431  | 0.012809036 | -0.039385906 |
| 0.575147034  | 3.12E-39    | 0.359194418  | 1.53E-14    | -0.030822196 |
| -0.30310439  | 1.38E-10    | -0.205716617 | 1.71E-05    | -0.025972832 |
| -0.263124809 | 3.05E-08    | -0.095236479 | 0.048426676 | 0.189396726  |
| -0.421368047 | 6.17E-20    | -0.223360832 | 2.90E-06    | 0.061314146  |
| 0.186092412  | 0.000103763 | 0.176484936  | 0.000235138 | -0.041544107 |
| 0.046630939  | 0.334710191 | -0.157944013 | 0.001015079 | 0.060083894  |
| 0.128637656  | 0.007566453 | 0.067945736  | 0.159582441 | 0.030615848  |
| 0.596445111  | 8.84E-43    | 0.273900034  | 7.74E-09    | -0.155020887 |
| 0.307785225  | 6.90E-11    | 0.27612765   | 5.79E-09    | 0.057740637  |
| 0.157947115  | 0.001014844 | -0.038996459 | 0.419896537 | -0.053639475 |

|              |             |              |             |              |
|--------------|-------------|--------------|-------------|--------------|
| 0.021916603  | 0.650401935 | 0.017726879  | 0.71395383  | 0.002452614  |
| 0.507847956  | 1.43E-29    | 0.480527626  | 3.17E-26    | -0.015787016 |
| 0.375299754  | 7.88E-16    | 0.137097357  | 0.00439817  | -0.039345589 |
| 0.097566457  | 0.04316411  | 0.040902996  | 0.397514953 | -0.020865953 |
| 0.379946094  | 3.24E-16    | 0.276493672  | 5.51E-09    | -0.068228897 |
| -0.045034588 | 0.35153735  | -0.035821456 | 0.458763106 | 0.054667861  |
| 0.369390018  | 2.39E-15    | 0.342263703  | 2.92E-13    | -0.118326238 |
| -0.137352088 | 0.004324894 | 0.098864114  | 0.040447956 | 0.078574991  |
| -0.366301327 | 4.22E-15    | -0.223766627 | 2.78E-06    | 0.087666061  |
| 0.508672186  | 1.12E-29    | 0.374191596  | 9.72E-16    | -0.016541623 |
| 0.153687617  | 0.001390243 | 0.20595656   | 1.67E-05    | 0.039444657  |
| 0.340695644  | 3.80E-13    | 0.184590894  | 0.000118239 | -0.039536294 |
| -0.240811633 | 4.34E-07    | -0.223010099 | 3.01E-06    | 0.001692516  |
| 0.248333523  | 1.82E-07    | 0.048003271  | 0.32066508  | 0.035008189  |
| 0.450310495  | 7.35E-23    | 0.31235182   | 3.48E-11    | -0.012922739 |
| -0.152063356 | 0.001564292 | -0.067577509 | 0.161861729 | 0.084866767  |
| 0.482282664  | 1.97E-26    | 0.341518052  | 3.31E-13    | -0.143143367 |
| -0.200260872 | 2.88E-05    | -0.127537257 | 0.008101953 | -0.066958368 |
| 0.04710093   | 0.329856233 | 0.121717771  | 0.011535472 | -0.098434181 |
| -0.430292927 | 8.28E-21    | -0.213354785 | 8.09E-06    | 0.080043494  |
| 0.048419847  | 0.316478707 | 0.046438309  | 0.336712809 | 0.023169693  |
| 0.60767317   | 9.28E-45    | 0.363014893  | 7.70E-15    | -0.097895245 |
| 0.453667431  | 3.23E-23    | 0.320152005  | 1.05E-11    | 0.003739875  |
| 0.487494461  | 4.74E-27    | 0.231576426  | 1.21E-06    | 0.018784277  |
| 0.326417957  | 3.92E-12    | 0.191669131  | 6.33E-05    | -0.038715321 |
| 0.444752295  | 2.82E-22    | 0.447402563  | 1.49E-22    | 0.004442421  |
| -0.158715713 | 0.00095801  | -0.055214847 | 0.253246944 | 0.012630115  |
| 0.479841533  | 3.81E-26    | 0.330342453  | 2.09E-12    | -0.07626934  |
| -0.172832923 | 0.000317435 | -0.363645016 | 6.87E-15    | 0.00101038   |
| 0.031708559  | 0.511969793 | 0.167733718  | 0.00047789  | 0.088813911  |
| 0.47101044   | 3.95E-25    | 0.227330278  | 1.91E-06    | -0.024847136 |
| 0.263905815  | 2.77E-08    | 0.05497071   | 0.255354813 | 0.02179315   |
| 0.030469288  | 0.528608375 | 0.011393588  | 0.813756743 | -0.022874642 |
| -0.355928555 | 2.74E-14    | -0.312071455 | 3.63E-11    | 0.066001203  |
| -0.43767832  | 1.50E-21    | -0.400505379 | 5.36E-18    | 0.008203963  |
| 0.083733668  | 0.082859396 | -0.110087139 | 0.022423664 | 0.019235727  |
| 0.096160104  | 0.046279603 | 0.146319976  | 0.002352384 | -0.010460988 |
| 0.182072595  | 0.000146856 | 0.077143712  | 0.110174169 | -0.137723351 |
| -0.340662991 | 3.82E-13    | -0.143483122 | 0.002862661 | 0.201465511  |
| 0.222034679  | 3.34E-06    | 0.094888634  | 0.049256607 | 0.096988698  |
| 0.268615009  | 1.53E-08    | 0.25819714   | 5.61E-08    | -0.097223638 |
| 0.166100422  | 0.000543477 | 0.079253859  | 0.10074727  | 0.004968441  |
| 0.24293051   | 3.41E-07    | 0.088665407  | 0.066228755 | 0.093474694  |
| -0.208798521 | 1.27E-05    | 0.00211213   | 0.965166959 | -0.01712746  |
| 0.671625524  | 1.03E-57    | 0.466563749  | 1.25E-24    | -0.047833614 |
| -0.297573746 | 3.06E-10    | -0.014981773 | 0.756726942 | 0.147089883  |
| -0.109244283 | 0.023480302 | -0.061890049 | 0.200238702 | 0.079123552  |
| -0.503817417 | 4.65E-29    | -0.217873507 | 5.12E-06    | 0.111364509  |
| 0.586657132  | 4.07E-41    | 0.392943591  | 2.51E-17    | -0.000315321 |
| 0.453358652  | 3.48E-23    | 0.236671838  | 6.90E-07    | -0.0663613   |
| -0.248778206 | 1.73E-07    | -0.011434472 | 0.813100739 | -0.000251454 |

|              |             |              |             |              |
|--------------|-------------|--------------|-------------|--------------|
| 0.281274617  | 2.92E-09    | 0.074896226  | 0.120964229 | 0.031203661  |
| -0.175844998 | 0.000247941 | -0.131435491 | 0.006344567 | -0.045773907 |
| -0.313364865 | 2.98E-11    | -0.123530141 | 0.010348959 | 0.053319007  |
| -0.379991162 | 3.21E-16    | -0.19380888  | 5.22E-05    | 0.153747707  |
| 0.358306484  | 1.80E-14    | 0.106207014  | 0.027652836 | -0.040263373 |
| 0.677077367  | 5.70E-59    | 0.383923121  | 1.50E-16    | -0.080581354 |
| -0.48939036  | 2.81E-27    | -0.232085835 | 1.14E-06    | 0.05917916   |
| 0.078021564  | 0.106171364 | -0.007964391 | 0.869199803 | -0.043812777 |
| 0.196882254  | 3.94E-05    | -0.010712171 | 0.824709323 | 0.028018101  |
| 0.373383956  | 1.13E-15    | 0.175036509  | 0.000265047 | -0.025102054 |
| 0.446715265  | 1.76E-22    | 0.22250991   | 3.17E-06    | -0.039564931 |
| 0.026318036  | 0.586270757 | -0.026124494 | 0.589028539 | -0.058255581 |
| -0.244988715 | 2.69E-07    | -0.086175094 | 0.074247518 | 0.022670022  |
| 0.630508093  | 4.89E-49    | 0.472123989  | 2.95E-25    | -0.070452446 |
| 0.588727019  | 1.83E-41    | 0.420929043  | 6.80E-20    | -0.047656405 |
| 0.311400482  | 4.02E-11    | 0.326010874  | 4.18E-12    | 0.028198722  |
| 0.570434506  | 1.75E-38    | 0.347876549  | 1.12E-13    | -0.056627001 |
| 0.567680379  | 4.75E-38    | 0.277505748  | 4.83E-09    | 0.011077248  |
| -0.406663999 | 1.48E-18    | -0.359339888 | 1.49E-14    | -0.001304276 |
| -0.420830329 | 6.95E-20    | -0.337267315 | 6.72E-13    | -0.01412769  |
| 0.150118716  | 0.001798872 | -0.006061419 | 0.900264257 | 0.012797374  |
| -0.371065106 | 1.75E-15    | -0.034883866 | 0.470613486 | 0.040289027  |
| 0.185512525  | 0.000109144 | 0.036058763  | 0.455790391 | -0.006457568 |
| 0.107449764  | 0.025874242 | 0.040379028  | 0.403593453 | 0.036379386  |
| 0.284640803  | 1.85E-09    | 0.109760568  | 0.022828074 | -0.032806656 |
| 0.416720622  | 1.71E-19    | 0.156780552  | 0.001107069 | -0.047870323 |
| -0.458349777 | 1.01E-23    | -0.231766687 | 1.18E-06    | 0.119289316  |
| -0.147964217 | 0.002096082 | -0.017631281 | 0.715429338 | 0.12983602   |
| -0.335162954 | 9.52E-13    | -0.214211563 | 7.42E-06    | 0.011451693  |
| -0.530294072 | 1.48E-32    | -0.370983447 | 1.77E-15    | 0.119527537  |
| -0.135462923 | 0.004895616 | -0.025074719 | 0.604089626 | -0.045882442 |
| 0.501318174  | 9.60E-29    | 0.28146641   | 2.85E-09    | -0.017910883 |
| -0.343454236 | 2.38E-13    | -0.19227191  | 6.00E-05    | 0.103329823  |
| 0.528967022  | 2.26E-32    | 0.476493148  | 9.32E-26    | -0.054146647 |
| -0.028752307 | 0.552105568 | -0.041572462 | 0.389829084 | 0.055422554  |
| 0.558014965  | 1.46E-36    | 0.355637893  | 2.89E-14    | -0.048185426 |
| 0.252097507  | 1.17E-07    | 0.167901272  | 0.000471595 | 0.17366089   |
| -0.24626125  | 2.32E-07    | -0.090476439 | 0.060855442 | -0.032801672 |
| 0.091202813  | 0.058803909 | -0.081501262 | 0.091423585 | 0.073145245  |
| 0.141532598  | 0.003269875 | 0.013674985  | 0.77736212  | 0.02676807   |
| -0.299402682 | 2.35E-10    | -0.197997281 | 3.55E-05    | 0.059105078  |
| 0.52432645   | 9.70E-32    | 0.412644677  | 4.14E-19    | -0.047221435 |
| -0.340781009 | 3.74E-13    | -0.11519655  | 0.016858753 | 0.091455113  |
| 0.50745174   | 1.61E-29    | 0.435935832  | 2.26E-21    | -0.084267946 |
| -0.241203845 | 4.15E-07    | -0.194739391 | 4.79E-05    | 0.042143626  |
| 0.258489295  | 5.41E-08    | 0.120673209  | 0.012272644 | 0.036864173  |
| -0.179698518 | 0.000179678 | -0.083928636 | 0.082143277 | 0.101732212  |
| 0.357728128  | 1.99E-14    | 0.235389115  | 7.96E-07    | -0.028160616 |
| 0.224447689  | 2.59E-06    | 0.045241502  | 0.349326636 | -0.044248075 |
| 0.427123679  | 1.70E-20    | 0.303157084  | 1.36E-10    | 0.005050275  |
| -0.21797808  | 5.07E-06    | -0.190382562 | 7.10E-05    | 0.023963212  |

|              |             |              |             |              |
|--------------|-------------|--------------|-------------|--------------|
| -0.107952026 | 0.025183895 | -0.156927003 | 0.001095082 | -0.011827543 |
| 0.592694827  | 3.90E-42    | 0.42544269   | 2.48E-20    | -0.024434417 |
| 0.490500823  | 2.06E-27    | 0.318655907  | 1.33E-11    | -0.084107034 |
| -0.482414505 | 1.90E-26    | -0.334068643 | 1.14E-12    | 0.042366013  |
| -0.384235966 | 1.41E-16    | -0.201003103 | 2.68E-05    | 0.091610451  |
| 0.214772736  | 7.02E-06    | 0.150394577  | 0.001763742 | -0.012390503 |
| -0.490207776 | 2.24E-27    | -0.277594583 | 4.77E-09    | 0.029806776  |
| 0.140010939  | 0.003623318 | -0.039571274 | 0.413072043 | 0.028785528  |
| 0.307834195  | 6.85E-11    | 0.063283189  | 0.190276567 | 0.002272899  |
| 0.261264125  | 3.85E-08    | 0.173718604  | 0.000295314 | -0.028582592 |
| 0.294814258  | 4.53E-10    | 0.034409395  | 0.476673988 | -0.059233211 |
| 0.554047352  | 5.77E-36    | 0.280952031  | 3.05E-09    | -0.044711036 |
| -0.009238452 | 0.848510664 | 0.04996411   | 0.301272839 | -0.04857934  |
| -0.199738844 | 3.02E-05    | -0.019308045 | 0.689707599 | 0.013114425  |
| 0.284796193  | 1.82E-09    | 0.203378285  | 2.14E-05    | -0.057379134 |
| -0.269733007 | 1.33E-08    | -0.055476794 | 0.250998769 | 0.103628721  |
| 0.225237715  | 2.38E-06    | -0.034105246 | 0.48058123  | -0.050443476 |
| -0.357636162 | 2.03E-14    | -0.184518953 | 0.000118978 | 0.054054196  |
| 0.394182026  | 1.95E-17    | 0.276959405  | 5.19E-09    | 0.034757932  |
| 0.518901334  | 5.17E-31    | 0.304534474  | 1.12E-10    | -0.080428211 |
| -0.344766656 | 1.91E-13    | -0.142886041 | 0.002982125 | 0.118562328  |
| -0.07123113  | 0.14030552  | -0.13567674  | 0.004827778 | 0.101447365  |
| -0.565162221 | 1.17E-37    | -0.40612505  | 1.66E-18    | 0.031959831  |
| -0.286299462 | 1.48E-09    | -0.165371462 | 0.000575367 | -0.050821158 |
| 0.244318191  | 2.91E-07    | 0.183264167  | 0.000132589 | -0.064325003 |
| 0.424294324  | 3.21E-20    | 0.211465773  | 9.76E-06    | -0.044048734 |
| -0.238139535 | 5.86E-07    | -0.19653643  | 4.07E-05    | -0.055790641 |
| 0.281567499  | 2.81E-09    | 0.160028998  | 0.000867651 | -0.047250708 |
| -0.211322341 | 9.90E-06    | 0.041771749  | 0.387558661 | 0.015150798  |
| -0.318531671 | 1.35E-11    | -0.100696769 | 0.03685899  | 0.150665918  |
| 0.050913226  | 0.292171805 | 0.00191958   | 0.968340727 | 0.038664875  |
| -0.165077072 | 0.000588731 | 0.054447888  | 0.259909623 | -0.086354081 |
| 0.726373901  | 1.05E-71    | 0.418941259  | 1.05E-19    | -0.101053484 |
| 0.238761122  | 5.46E-07    | 0.000708485  | 0.988312448 | -0.045011223 |
| 0.233230597  | 1.01E-06    | 0.128832298  | 0.007475095 | 0.018671248  |
| 0.462487153  | 3.55E-24    | 0.457709534  | 1.18E-23    | 0.027151441  |
| 0.305762459  | 9.31E-11    | 0.195544866  | 4.45E-05    | 0.056169688  |
| 0.286179777  | 1.50E-09    | 0.137117111  | 0.004392448 | -0.000726372 |
| 0.368150398  | 3.00E-15    | 0.192260278  | 6.00E-05    | 0.061836619  |
| -0.185333975 | 0.000110853 | -0.164204963 | 0.00063003  | 0.099696983  |
| 0.523043811  | 1.44E-31    | 0.3535189    | 4.20E-14    | -0.033196571 |
| 0.575306626  | 2.94E-39    | 0.293317523  | 5.59E-10    | -0.053765978 |
| 0.118541847  | 0.013906908 | -0.066565144 | 0.1682543   | -0.025201924 |
| -0.089823525 | 0.062749587 | 0.139325294  | 0.003793611 | 0.015286775  |
| 0.630663538  | 4.56E-49    | 0.450143139  | 7.66E-23    | -0.076459913 |
| 0.048077544  | 0.319916048 | 0.122512305  | 0.011001251 | -0.060891894 |
| -0.448918009 | 1.03E-22    | -0.303429891 | 1.31E-10    | 0.162611877  |
| -0.468263551 | 8.07E-25    | -0.253723867 | 9.63E-08    | 0.073224377  |
| 0.074151676  | 0.124715006 | -0.058333826 | 0.227377076 | -0.008790221 |
| 0.131341185  | 0.006382683 | 0.010019832  | 0.835872364 | 0.000847634  |
| -0.273731501 | 7.91E-09    | -0.09083784  | 0.059827453 | -0.041873506 |

|              |             |              |             |              |
|--------------|-------------|--------------|-------------|--------------|
| 0.414075856  | 3.04E-19    | 0.205060626  | 1.82E-05    | -0.039796542 |
| 0.724390072  | 3.87E-71    | 0.538564143  | 1.03E-33    | -0.09443795  |
| -0.220935561 | 3.74E-06    | -0.124540574 | 0.009735571 | 0.017044532  |
| 0.174431947  | 0.000278553 | 0.34004842   | 4.23E-13    | -0.045828758 |
| -0.171934212 | 0.000341454 | -0.01165971  | 0.809489016 | 0.075251866  |
| 0.50788452   | 1.41E-29    | 0.25395083   | 9.37E-08    | -0.048829061 |
| 0.382623359  | 1.93E-16    | 0.2433911    | 3.23E-07    | -0.005901852 |
| 0.098274062  | 0.041664559 | 0.03387383   | 0.483565727 | 0.056734593  |
| -0.320910342 | 9.34E-12    | -0.208117056 | 1.36E-05    | 0.071636347  |
| 0.098189545  | 0.041841324 | -0.102810675 | 0.033058466 | -0.007465    |
| -0.274427074 | 7.23E-09    | -0.099283721 | 0.039601165 | 0.088080414  |
| 0.27354599   | 8.11E-09    | 0.006026989  | 0.900827852 | 0.069598144  |
| -0.471931206 | 3.11E-25    | -0.228698073 | 1.65E-06    | 0.085457254  |
| -0.26109479  | 3.93E-08    | -0.113351801 | 0.018710282 | 0.09400365   |
| -0.226789153 | 2.02E-06    | -0.214736444 | 7.04E-06    | -0.08826921  |
| -0.503052335 | 5.81E-29    | -0.294347271 | 4.83E-10    | 0.178160525  |
| 0.329509683  | 2.39E-12    | 0.102337724  | 0.03387842  | 0.01689837   |
| 0.268604502  | 1.53E-08    | 0.250556977  | 1.40E-07    | -0.019557542 |
| -0.194985445 | 4.69E-05    | -0.009818943 | 0.839117723 | -0.092331622 |
| -0.219022761 | 4.55E-06    | 0.002141784  | 0.96467823  | 0.089136843  |
| 0.467804201  | 9.09E-25    | 0.354896906  | 3.29E-14    | -0.0541114   |
| 0.276387653  | 5.59E-09    | 0.23477097   | 8.52E-07    | -0.004784336 |
| 0.025186643  | 0.60247567  | -0.144894953 | 0.002597307 | 0.062304024  |
| -0.363780009 | 6.70E-15    | -0.239883195 | 4.82E-07    | 0.013827284  |
| -0.163836955 | 0.00064825  | -0.259107238 | 5.02E-08    | 0.03845492   |
| 0.1495575    | 0.001872328 | 0.130722658  | 0.006637804 | -0.062405951 |
| 0.276738149  | 5.34E-09    | 0.206193328  | 1.64E-05    | -0.007638949 |
| 0.169280494  | 0.000422631 | -0.063998405 | 0.185305729 | 0.015100663  |
| 0.174699062  | 0.000272508 | 0.061363566  | 0.204100638 | 0.032872252  |
| 0.606056939  | 1.81E-44    | 0.502605927  | 6.62E-29    | 0.003047344  |
| -0.271536157 | 1.05E-08    | -0.115689121 | 0.016392327 | -0.008514361 |
| 0.71006303   | 3.40E-67    | 0.553307122  | 7.44E-36    | -0.032723741 |
| -0.23546971  | 7.88E-07    | -0.038545852 | 0.425292234 | 0.073774813  |
| -0.353737823 | 4.04E-14    | -0.118881633 | 0.013634184 | -0.045786818 |
| -0.118354075 | 0.014059671 | 0.068374497  | 0.156959043 | 0.09891115   |
| -0.389740853 | 4.76E-17    | -0.145227392 | 0.002538178 | 0.090490749  |
| -0.174952335 | 0.00026689  | 0.021634122  | 0.654614284 | 0.064473484  |
| -0.415831597 | 2.08E-19    | -0.200001686 | 2.95E-05    | 0.03470948   |
| 0.217562153  | 5.29E-06    | 0.000706006  | 0.988353344 | 0.166483326  |
| -0.144093045 | 0.002745138 | -0.14595812  | 0.002412496 | -0.029470289 |
| 0.290776283  | 7.98E-10    | 0.086937641  | 0.071712216 | -0.052495784 |
| -0.263462247 | 2.93E-08    | -0.040987203 | 0.396543228 | 0.041650092  |
| -0.369470331 | 2.35E-15    | -0.07591131  | 0.115992995 | 0.03494528   |
| -0.214239018 | 7.40E-06    | -0.068251503 | 0.157708231 | 0.110868899  |
| -0.117488084 | 0.014783456 | -0.004352095 | 0.928299375 | 0.098231703  |
| 0.418812684  | 1.08E-19    | 0.158763561  | 0.000954571 | 0.001680496  |
| -0.33103325  | 1.87E-12    | -0.16731996  | 0.000493771 | 0.115678158  |
| -0.352997042 | 4.60E-14    | -0.239338755 | 5.12E-07    | 0.048106165  |
| -0.025485    | 0.598182814 | -0.133867117 | 0.00542967  | 0.051801246  |
| -0.399366377 | 6.78E-18    | -0.245888857 | 2.42E-07    | 0.068399336  |
| 0.345229086  | 1.76E-13    | 0.323823375  | 5.91E-12    | 0.084851478  |

|              |             |              |             |              |
|--------------|-------------|--------------|-------------|--------------|
| 0.424223605  | 3.27E-20    | 0.208685117  | 1.28E-05    | 0.018693431  |
| 0.452233132  | 4.59E-23    | 0.210845275  | 1.04E-05    | -0.03154     |
| -0.495666935 | 4.83E-28    | -0.368356843 | 2.89E-15    | 0.115477458  |
| 0.278579882  | 4.19E-09    | 0.145266227  | 0.002531351 | 0.009434428  |
| -0.013133777 | 0.785955179 | -0.143453737 | 0.002868437 | 0.026156566  |
| 0.120225338  | 0.012601252 | 0.030241838  | 0.531691678 | -0.034518761 |
| 0.525440813  | 6.85E-32    | 0.205822175  | 1.69E-05    | -0.043864717 |
| 0.540160508  | 6.14E-34    | 0.247449697  | 2.02E-07    | -0.04685545  |
| -0.165438697 | 0.000572355 | -0.087608224 | 0.069541496 | -0.063333896 |
| 0.115072516  | 0.016978018 | -0.03396411  | 0.482400223 | 0.014807078  |
| -0.216375874 | 5.97E-06    | -0.071512863 | 0.138739393 | 0.080809892  |
| -0.251793933 | 1.21E-07    | -0.076344434 | 0.113921156 | 0.024558251  |
| -0.045051014 | 0.351361531 | 0.052280783  | 0.27938517  | -0.020408658 |
| 0.420649403  | 7.23E-20    | 0.291858607  | 6.86E-10    | -0.0578705   |
| 0.220776268  | 3.80E-06    | -0.004085943 | 0.932673504 | -0.098355862 |
| 0.289485779  | 9.54E-10    | -0.015548428 | 0.747831533 | -0.111512761 |
| 0.543632536  | 1.95E-34    | 0.348852082  | 9.47E-14    | 0.004368058  |
| -0.063529331 | 0.188554921 | -0.051398802 | 0.287587548 | 0.089911161  |
| 0.114686127  | 0.01735429  | 0.052419621  | 0.278108566 | 0.01170237   |
| -0.420216945 | 7.95E-20    | -0.230729328 | 1.32E-06    | 0.007158637  |
| 0.376105164  | 6.76E-16    | 0.190793021  | 6.85E-05    | 0.059977383  |
| 0.278076716  | 4.47E-09    | 0.036102687  | 0.455241348 | -0.040293618 |
| -0.412803028 | 4.01E-19    | -0.231822803 | 1.18E-06    | 0.002188626  |
| 0.207827162  | 1.40E-05    | -0.006621261 | 0.89110729  | 0.008746977  |
| -0.418050264 | 1.28E-19    | -0.161819059 | 0.000757136 | 0.176780331  |
| 0.646048312  | 3.69E-52    | 0.41932611   | 9.68E-20    | -0.062500032 |
| 0.326871741  | 3.65E-12    | 0.133077011  | 0.005713017 | -0.140182763 |
| 0.321610786  | 8.37E-12    | 0.242330081  | 3.65E-07    | 0.013290583  |
| -0.456588469 | 1.56E-23    | -0.237616155 | 6.21E-07    | 0.226313815  |
| 0.31282156   | 3.24E-11    | 0.131273369  | 0.006410219 | -0.056170629 |
| 0.601722776  | 1.06E-43    | 0.526481113  | 4.94E-32    | -0.024911501 |
| 0.179505894  | 0.000182623 | 0.027275283  | 0.572719504 | 0.018112561  |
| -0.446122301 | 2.03E-22    | -0.276741141 | 5.34E-09    | 0.162090922  |
| 0.442136851  | 5.26E-22    | 0.251113169  | 1.31E-07    | -0.102869379 |
| 0.741406509  | 3.70E-76    | 0.430865163  | 7.27E-21    | -0.086427132 |
| 0.221300532  | 3.60E-06    | 0.078025285  | 0.106154643 | 0.01682418   |
| -0.273441493 | 8.22E-09    | -0.240936245 | 4.27E-07    | 0.049316119  |
| -0.262080453 | 3.48E-08    | -0.023822021 | 0.622283985 | 0.084770067  |
| 0.470730632  | 4.25E-25    | 0.384816183  | 1.26E-16    | -0.029522343 |
| -0.231734053 | 1.19E-06    | -0.264822181 | 2.47E-08    | 0.045598556  |
| 0.481771128  | 2.26E-26    | 0.381784359  | 2.27E-16    | -0.023795163 |
| -0.196113845 | 4.23E-05    | -0.164175874 | 0.000631453 | 0.001886638  |
| 0.253655452  | 9.71E-08    | 0.183677847  | 0.000127948 | -0.003454698 |
| 0.513780337  | 2.44E-30    | 0.297407386  | 3.13E-10    | -0.000165267 |
| 0.089633091  | 0.06331111  | 0.05348758   | 0.268421118 | 0.000284098  |
| 0.445911844  | 2.13E-22    | 0.176460853  | 0.000235609 | -0.04714157  |
| -0.481229314 | 2.62E-26    | -0.338596378 | 5.39E-13    | 0.004530873  |
| 0.275478332  | 6.30E-09    | 0.227442373  | 1.89E-06    | -0.034597654 |
| 0.35184028   | 5.63E-14    | 0.249227735  | 1.64E-07    | -0.047023103 |
| 0.568827535  | 3.14E-38    | 0.35153282   | 5.94E-14    | -0.06241857  |
| -0.13079326  | 0.006608228 | -0.064841061 | 0.179572775 | -0.042949295 |

|              |             |              |             |              |
|--------------|-------------|--------------|-------------|--------------|
| 0.028117661  | 0.560918342 | -0.006626412 | 0.891023105 | -0.003601699 |
| 0.388699838  | 5.85E-17    | 0.331228803  | 1.81E-12    | 0.064081743  |
| -0.225282561 | 2.37E-06    | 0.035080924  | 0.468108941 | 0.115105257  |
| 0.112259698  | 0.019887954 | 0.034523369  | 0.475214307 | 0.068604155  |
| -0.204407819 | 1.94E-05    | -0.023052762 | 0.633572838 | 0.03714789   |
| -0.657553335 | 1.37E-54    | -0.390624384 | 3.99E-17    | 0.138144532  |
| 0.658514202  | 8.47E-55    | 0.37332886   | 1.14E-15    | -0.087689052 |
| -0.118025999 | 0.014330122 | 0.079763245  | 0.098570446 | 0.028462856  |
| 0.272618374  | 9.14E-09    | 0.149336568  | 0.00190199  | 0.002901994  |
| -0.065171027 | 0.177364034 | -0.090751673 | 0.060071238 | 0.070210387  |
| 0.12779923   | 0.007971488 | 0.036110984  | 0.455137674 | 0.000343141  |
| -0.036234773 | 0.453592527 | -0.167857317 | 0.000473239 | -0.010797396 |
| -0.386931452 | 8.31E-17    | -0.140813237 | 0.003432868 | 0.105901172  |
| -0.286704807 | 1.40E-09    | -0.183212654 | 0.000133178 | 0.09377449   |
| 0.412972284  | 3.86E-19    | 0.142251073  | 0.003114127 | -0.022955827 |
| 0.636547289  | 3.14E-50    | 0.608678783  | 6.12E-45    | -0.043214075 |
| 0.263757337  | 2.82E-08    | 0.109549046  | 0.023093371 | 0.017517733  |
| 0.50559698   | 2.77E-29    | 0.369630817  | 2.28E-15    | -0.064952459 |
| 0.494947634  | 5.92E-28    | 0.30903384   | 5.73E-11    | -0.025014114 |
| 0.48147753   | 2.45E-26    | 0.24621989   | 2.33E-07    | -0.049252551 |
| -0.443937867 | 3.42E-22    | -0.230593691 | 1.34E-06    | 0.075325797  |
| 0.188150273  | 8.66E-05    | 0.108175502  | 0.024881876 | 0.010781148  |
| 0.618718553  | 8.75E-47    | 0.272171656  | 9.69E-09    | -0.041083143 |
| -0.264497366 | 2.57E-08    | -0.108168622 | 0.024891127 | 0.100358481  |
| 0.08356465   | 0.083484273 | 0.004374708  | 0.927927836 | -0.030098787 |
| 0.182588517  | 0.000140511 | -0.095421222 | 0.047990674 | -0.008638745 |
| 0.073449821  | 0.128332869 | 0.071924188  | 0.136477021 | 0.08729238   |
| -0.240623    | 4.43E-07    | -0.043192513 | 0.37160613  | 0.134175664  |
| 0.267335733  | 1.80E-08    | 0.045557762  | 0.34596468  | 0.041048776  |
| -0.162582029 | 0.000714117 | 0.102384586  | 0.033796409 | 0.037537973  |
| 0.221075163  | 3.69E-06    | 0.031526756  | 0.514393539 | -0.025821033 |
| 0.208278162  | 1.34E-05    | 0.069217896  | 0.151893916 | -0.031972443 |
| 0.710179691  | 3.16E-67    | 0.370323592  | 2.01E-15    | -0.075593664 |
| 0.169334982  | 0.000420798 | 0.06284751   | 0.193352155 | 0.038253595  |
| -0.15068732  | 0.00172715  | -0.028984986 | 0.548891616 | -0.045075473 |
| 0.478930049  | 4.86E-26    | 0.341882423  | 3.11E-13    | 0.053738623  |
| 0.339798449  | 4.41E-13    | 0.105008638  | 0.029466433 | 0.042536447  |
| -0.221501925 | 3.53E-06    | -0.016245736 | 0.736930966 | -0.00217322  |
| 0.312092197  | 3.62E-11    | 0.053018384  | 0.272648371 | -0.003262605 |
| 0.124606524  | 0.009696682 | -0.008890094 | 0.854157851 | 0.004455828  |
| 0.548136926  | 4.32E-35    | 0.280652565  | 3.18E-09    | -0.032983608 |
| -0.428770189 | 1.17E-20    | -0.361508542 | 1.01E-14    | -0.026783021 |
| 0.616434282  | 2.33E-46    | 0.417257837  | 1.52E-19    | -0.072344151 |
| -0.26339511  | 2.95E-08    | -0.13845953  | 0.00401898  | 0.017121295  |
| 0.248117497  | 1.87E-07    | 0.068923682  | 0.15364657  | -0.108215581 |
| -0.086465622 | 0.073273098 | 0.027636942  | 0.567638525 | 0.084985745  |
| -0.218796249 | 4.66E-06    | -0.194471408 | 4.91E-05    | -0.030429251 |
| 0.360198668  | 1.28E-14    | 0.138363956  | 0.004044588 | -0.016624444 |
| 0.267710992  | 1.72E-08    | 0.322294956  | 7.52E-12    | -0.068028494 |
| 0.113106123  | 0.018969774 | 0.001221951  | 0.979843466 | -0.020112727 |
| -0.005974751 | 0.901683044 | -0.011639388 | 0.809814716 | 0.049506171  |



|              |             |              |             |              |
|--------------|-------------|--------------|-------------|--------------|
| 0.56962335   | 2.36E-38    | 0.331695043  | 1.68E-12    | -0.056644307 |
| -0.193819172 | 5.21E-05    | -0.034760907 | 0.472179984 | 0.048406217  |
| 0.480295175  | 3.37E-26    | 0.348832126  | 9.50E-14    | -0.020095706 |
| 0.479883576  | 3.76E-26    | 0.374588589  | 9.01E-16    | -0.01996346  |
| -0.326898999 | 3.63E-12    | -0.080089655 | 0.09719534  | 0.077366406  |
| 0.389386326  | 5.11E-17    | 0.238097573  | 5.89E-07    | -0.003064655 |
| 0.291153378  | 7.57E-10    | 0.137067928  | 0.004406708 | -0.023270174 |
| -0.015529308 | 0.748131139 | -0.098784267 | 0.040610812 | -0.030225805 |
| 0.061064755  | 0.206316401 | 0.119859902  | 0.012875101 | -0.082396395 |
| 0.366407096  | 4.14E-15    | 0.238970798  | 5.34E-07    | 0.041901882  |
| -0.144999988 | 0.002578491 | 0.032475469  | 0.501811271 | 0.060904161  |
| -0.062062853 | 0.198982791 | 0.109939218  | 0.022606067 | 0.150311719  |
| 0.585973478  | 5.29E-41    | 0.33682745   | 7.23E-13    | -0.059825355 |
| 0.339820723  | 4.39E-13    | 0.204021909  | 2.01E-05    | -0.096320902 |
| 0.452323843  | 4.49E-23    | 0.318889095  | 1.28E-11    | 0.024080948  |
| -0.224503574 | 2.58E-06    | 0.057353684  | 0.235296063 | 0.017777875  |
| -0.483875076 | 1.28E-26    | -0.27032822  | 1.23E-08    | 0.156436799  |
| 0.57312245   | 6.57E-39    | 0.285720339  | 1.60E-09    | -0.065232616 |
| 0.116173978  | 0.015944279 | 0.170304098  | 0.000389397 | -0.003225177 |
| 0.27258993   | 9.18E-09    | 0.200377049  | 2.84E-05    | 0.074803107  |
| 0.253735488  | 9.62E-08    | 0.175593059  | 0.000253158 | -0.007501062 |
| -0.145381653 | 0.002511159 | -0.029715101 | 0.538866794 | 0.053109798  |
| 0.521299257  | 2.48E-31    | 0.410262339  | 6.91E-19    | -0.044251617 |
| 0.515705693  | 1.37E-30    | 0.311434663  | 4.00E-11    | -0.050774616 |
| 0.031815032  | 0.510553075 | 0.001880038  | 0.96899256  | -0.04693765  |
| 0.186766821  | 9.78E-05    | 0.021384516  | 0.65834555  | 0.032793147  |
| -0.169583674 | 0.000412522 | -0.090209256 | 0.06162477  | -0.043615518 |
| -0.244423153 | 2.87E-07    | -0.116959388 | 0.015241246 | 0.026347669  |
| 0.636508452  | 3.20E-50    | 0.371813789  | 1.52E-15    | -0.063883038 |
| 0.469383404  | 6.04E-25    | 0.23149037   | 1.22E-06    | -0.063831405 |
| 0.434789802  | 2.94E-21    | 0.246128527  | 2.36E-07    | -0.022510406 |
| 0.315606748  | 2.12E-11    | 0.188741765  | 8.22E-05    | 0.023703638  |
| 0.216426204  | 5.94E-06    | 0.082847756  | 0.086177099 | 0.039668475  |
| 0.205278225  | 1.79E-05    | 0.120437645  | 0.012444524 | 0.001925782  |
| 0.44945731   | 9.05E-23    | 0.212520652  | 8.79E-06    | -0.063062799 |
| -0.146670208 | 0.002295508 | 0.085749151  | 0.075695162 | -0.005211037 |
| 0.40764983   | 1.20E-18    | 0.329135572  | 2.54E-12    | -0.030954815 |
| -0.462372787 | 3.65E-24    | -0.286862578 | 1.37E-09    | 0.054519385  |
| -0.198657786 | 3.34E-05    | -0.04350991  | 0.368098605 | -0.022929517 |
| 0.412068544  | 4.69E-19    | 0.141231726  | 0.003337172 | -0.034052584 |
| 0.172415996  | 0.000328375 | 0.096204816  | 0.046177724 | 0.032883649  |
| -0.52054084  | 3.13E-31    | -0.438371951 | 1.28E-21    | 0.078695089  |
| -0.201771961 | 2.49E-05    | -0.181404991 | 0.000155467 | 0.109505846  |
| 0.231897016  | 1.17E-06    | 0.142783252  | 0.003003142 | 0.017408566  |
| 0.098525658  | 0.041142079 | -0.061413532 | 0.203731817 | -0.007895547 |
| 0.105142688  | 0.029258626 | -0.063145126 | 0.191247284 | 0.09281829   |
| 0.312678985  | 3.31E-11    | 0.453147712  | 3.67E-23    | 0.016006058  |
| -0.290072732 | 8.80E-10    | -0.124627845 | 0.009684139 | 0.073457807  |
| -0.407380958 | 1.27E-18    | -0.308916045 | 5.83E-11    | 0.026644212  |
| -0.493011299 | 1.02E-27    | -0.245623529 | 2.50E-07    | 0.025477404  |
| -0.218843107 | 4.64E-06    | 0.051545041  | 0.286216453 | -0.058194134 |

|              |             |              |             |              |
|--------------|-------------|--------------|-------------|--------------|
| 0.312354822  | 3.48E-11    | 0.268597008  | 1.53E-08    | -0.061347005 |
| 0.34085516   | 3.70E-13    | 0.206063318  | 1.66E-05    | -0.043604332 |
| 0.439797334  | 9.14E-22    | 0.317208465  | 1.66E-11    | -0.105587263 |
| -0.162492765 | 0.00071903  | -0.029831255 | 0.537280413 | 0.049367889  |
| 0.323938477  | 5.81E-12    | 0.184148108  | 0.000122858 | -4.15E-05    |
| 0.858959089  | 1.72E-126   | 0.566153424  | 8.23E-38    | -0.077970305 |
| -0.306018332 | 8.97E-11    | -0.068214514 | 0.157934074 | 0.077701168  |
| -0.087406538 | 0.070188638 | -0.036939437 | 0.44485321  | 0.069871856  |
| -0.105231063 | 0.029122313 | -0.045097883 | 0.350860155 | 0.153738046  |
| -0.236350859 | 7.15E-07    | -0.1666837   | 0.000519151 | 0.097132557  |
| 0.701654973  | 5.43E-65    | 0.556418083  | 2.55E-36    | -0.053999825 |
| -0.235905558 | 7.51E-07    | -0.212665015 | 8.66E-06    | -0.109301806 |
| 0.487771629  | 4.39E-27    | 0.374653512  | 8.90E-16    | -0.028270983 |
| 0.36661764   | 3.99E-15    | 0.09076381   | 0.06003685  | 0.003830063  |
| 0.30022735   | 2.09E-10    | 0.12557299   | 0.009142401 | -0.010814039 |
| 0.403333388  | 2.98E-18    | 0.105133632  | 0.029272624 | -0.016291634 |
| 0.354268161  | 3.68E-14    | 0.211386149  | 9.84E-06    | 0.032918441  |
| 0.114407745  | 0.017629881 | -0.00280855  | 0.953692938 | 0.002222186  |
| 0.164699285  | 0.000606303 | 0.232255588  | 1.12E-06    | 0.029069216  |
| 0.104616452  | 0.030081688 | -0.044163487 | 0.360940948 | 0.074322178  |
| -0.020179153 | 0.676482183 | 0.040342484  | 0.404019463 | -0.022790354 |
| -0.138350126 | 0.004048305 | 0.074911752  | 0.120886963 | 0.036569451  |
| -0.432307558 | 5.22E-21    | -0.24896975  | 1.69E-07    | 0.074963473  |
| -0.182203945 | 0.000145216 | -0.143784075 | 0.002804112 | -0.059126692 |
| 0.357230577  | 2.18E-14    | 0.062579779  | 0.195260117 | -0.022877443 |
| 0.535326593  | 2.96E-33    | 0.33892683   | 5.10E-13    | -0.054840297 |
| 0.072897703  | 0.131235589 | -0.067205219 | 0.164190969 | 0.044328794  |
| -0.126023596 | 0.008893744 | -0.030654935 | 0.526098499 | 0.154688929  |
| 0.218753977  | 4.68E-06    | 0.259943747  | 4.53E-08    | -0.013869049 |
| -0.213368054 | 8.08E-06    | -0.149275606 | 0.00191025  | 0.003994981  |
| 0.121488636  | 0.011693738 | 0.028870931  | 0.550465887 | 0.060864039  |
| 0.133757192  | 0.005468319 | 0.013925807  | 0.773388783 | 0.015129082  |
| -0.223731509 | 2.79E-06    | -0.143132036 | 0.002932368 | 0.122859831  |
| 0.446397626  | 1.90E-22    | 0.200268583  | 2.87E-05    | 0.032997253  |
| -0.188456386 | 8.43E-05    | -0.07939012  | 0.100161263 | 0.057966731  |
| -0.133042033 | 0.005725862 | 0.056037164  | 0.246236058 | 0.120399866  |
| 0.037713514  | 0.435364286 | 0.220938797  | 3.74E-06    | 0.004522216  |
| -0.142690673 | 0.003022187 | 0.018964595  | 0.694948309 | 0.007675608  |
| 0.137184476  | 0.004372984 | 0.039961596  | 0.408475509 | -0.014814548 |
| -0.183151382 | 0.000133882 | -0.067712412 | 0.161023868 | -0.060464587 |
| -0.028156899 | 0.560371525 | 0.202040655  | 2.43E-05    | 0.043095463  |
| 0.111884683  | 0.020306967 | 0.155242057  | 0.001240516 | 0.062498427  |
| 0.187919556  | 8.84E-05    | 0.119934132  | 0.012819054 | -0.053744844 |
| -0.450514959 | 6.99E-23    | -0.362317793 | 8.74E-15    | 0.08163651   |
| 0.115806998  | 0.016282397 | 0.017412275  | 0.718813562 | 0.010556679  |
| 0.08016401   | 0.096884246 | 0.109931495  | 0.022615626 | 0.111483809  |
| 0.188871066  | 8.13E-05    | 0.063799515  | 0.186678329 | 0.074699333  |
| 0.435999191  | 2.22E-21    | 0.354738411  | 3.39E-14    | -0.105370355 |
| -0.384949404 | 1.23E-16    | -0.189887527 | 7.43E-05    | 0.181694337  |
| 0.578792379  | 8.04E-40    | 0.438677074  | 1.19E-21    | -0.019943405 |
| 0.034452517  | 0.476121435 | -0.085046235 | 0.07813428  | 0.016642405  |

|              |             |              |             |              |
|--------------|-------------|--------------|-------------|--------------|
| -0.366428173 | 4.13E-15    | -0.247528423 | 2.00E-07    | -0.031197255 |
| -0.27472837  | 6.95E-09    | -0.099987284 | 0.038214985 | 0.1536142    |
| 0.300629223  | 1.97E-10    | 0.134722748  | 0.005137139 | -0.007626222 |
| -0.23034188  | 1.38E-06    | -0.082571829 | 0.087232003 | -0.085911084 |
| 0.320815988  | 9.48E-12    | 0.292685509  | 6.11E-10    | 0.019397628  |
| -0.327415049 | 3.34E-12    | -0.003455492 | 0.943042601 | -0.00121406  |
| -0.10151407  | 0.035347763 | -0.147294373 | 0.002197247 | 0.072352066  |
| 0.028783645  | 0.551672164 | -0.089735599 | 0.063008339 | -0.070703538 |
| 0.249335757  | 1.62E-07    | 0.105162384  | 0.029228199 | -0.100972466 |
| 0.178493098  | 0.000198863 | 0.027547258  | 0.5688965   | 0.003553331  |
| 0.15281164   | 0.001481765 | 0.097655115  | 0.042973772 | -0.030587544 |
| -0.038170758 | 0.429814325 | 0.044545466  | 0.356798261 | -0.048371202 |
| -0.009076867 | 0.851129151 | 0.167869631  | 0.000472778 | -0.084762627 |
| -0.088187307 | 0.067710502 | 0.008525276  | 0.860079868 | -0.020860835 |
| 0.341999666  | 3.05E-13    | 0.15216161   | 0.00155322  | -0.02549419  |
| 0.569702135  | 2.29E-38    | 0.362099933  | 9.09E-15    | -0.031566689 |
| -0.102120163 | 0.034261384 | 0.098956641  | 0.040259927 | -0.028432066 |
| -0.500420642 | 1.24E-28    | -0.328695952 | 2.72E-12    | 0.062896888  |
| -0.264231441 | 2.66E-08    | -0.19022452  | 7.21E-05    | 0.020150309  |
| -0.394386853 | 1.87E-17    | -0.263523713 | 2.91E-08    | 0.088385689  |
| 0.495320323  | 5.33E-28    | 0.44726665   | 1.54E-22    | -0.046600132 |
| -0.068037858 | 0.159016018 | 0.024757765  | 0.608670601 | -0.020939864 |
| 0.568212932  | 3.92E-38    | 0.286414036  | 1.46E-09    | -0.012601249 |
| 0.278915021  | 4.00E-09    | 0.191136794  | 6.64E-05    | -0.033534405 |
| -0.192844076 | 5.70E-05    | -0.031184004 | 0.518979141 | 0.012213278  |
| -0.157482727 | 0.001050673 | -0.024483024 | 0.612653875 | 0.022135014  |
| -0.18166133  | 0.000152106 | 0.033667051  | 0.486240942 | 0.069947855  |
| 0.1183522    | 0.014061203 | 0.048487562  | 0.315801601 | -0.043318623 |
| 0.351755089  | 5.72E-14    | 0.071270081  | 0.140088194 | -0.011118609 |
| -0.335136553 | 9.56E-13    | -0.179321128 | 0.00018549  | -0.016201125 |
| -0.081708107 | 0.090601389 | -0.053426529 | 0.268968613 | 0.007565966  |
| 0.356382769  | 2.53E-14    | 0.173238411  | 0.000307123 | 0.031751424  |
| 0.086919984  | 0.071770111 | 0.027329174  | 0.571961018 | 0.119108509  |
| 0.167343266  | 0.000492863 | 0.046582614  | 0.335211867 | -0.040650187 |
| 0.26654575   | 1.99E-08    | 0.048558956  | 0.315088725 | 0.018157856  |
| -0.259066693 | 5.04E-08    | -0.070044995 | 0.147048086 | 0.095247557  |
| -0.056082057 | 0.245857253 | -0.010348645 | 0.830566435 | 0.00244062   |
| 0.293027077  | 5.82E-10    | 0.160475799  | 0.000838751 | 0.142446209  |
| -0.296067916 | 3.79E-10    | -0.118379084 | 0.01403924  | 0.005396254  |
| 0.469725568  | 5.52E-25    | 0.34075974   | 3.75E-13    | -0.060339177 |
| 0.253266172  | 1.02E-07    | 0.059026355  | 0.221897185 | -0.012837356 |
| 0.556836072  | 2.20E-36    | 0.308900033  | 5.84E-11    | -0.066760347 |
| 0.110768726  | 0.021599567 | -0.070220105 | 0.146037424 | 0.034800329  |
| -0.480492335 | 3.20E-26    | -0.244678076 | 2.79E-07    | 0.165742161  |
| -0.141179617 | 0.003348955 | -0.054547262 | 0.259039592 | 0.088540787  |
| -0.299989192 | 2.16E-10    | -0.219853839 | 4.18E-06    | -0.007870184 |
| 0.162706694  | 0.000707306 | 0.036289482  | 0.452910576 | -0.001402237 |
| -0.636710368 | 2.92E-50    | -0.397502847 | 9.94E-18    | 0.074204387  |
| -0.224436027 | 2.59E-06    | -0.116139396 | 0.015975876 | 0.016887115  |
| 0.047009786  | 0.330793979 | 0.041360683  | 0.392250638 | -0.021293146 |
| 0.362397088  | 8.61E-15    | 0.239078093  | 5.27E-07    | -0.035890231 |

|              |             |              |             |              |
|--------------|-------------|--------------|-------------|--------------|
| 0.406428316  | 1.56E-18    | 0.278749479  | 4.09E-09    | -0.059806885 |
| 0.462676979  | 3.38E-24    | 0.230863377  | 1.31E-06    | -0.071039321 |
| 0.599427073  | 2.68E-43    | 0.321290765  | 8.80E-12    | -0.033861638 |
| -0.39651266  | 1.22E-17    | -0.230946541 | 1.29E-06    | 0.102497188  |
| -0.016400312 | 0.734521609 | 0.004098771  | 0.932462622 | -0.10525957  |
| -0.142574695 | 0.003046201 | -0.082586519 | 0.087175578 | -0.016459851 |
| 0.132195609  | 0.006044726 | -0.019500248 | 0.686781219 | 0.03525795   |
| -0.442768722 | 4.52E-22    | -0.309770673 | 5.13E-11    | 0.154844931  |
| 0.116198314  | 0.015922075 | 0.087994227  | 0.068316556 | 0.044437948  |
| 0.217756877  | 5.19E-06    | 0.110787255  | 0.021577536 | -0.044967335 |
| 0.039578764  | 0.412983559 | -0.099300979 | 0.03956666  | -0.014280966 |
| -0.566581508 | 7.06E-38    | -0.357111096 | 2.22E-14    | 0.081740645  |
| 0.08694115   | 0.071700714 | 0.096678386  | 0.045110178 | -0.053565111 |
| 0.653763656  | 8.88E-54    | 0.450754413  | 6.60E-23    | -0.095726292 |
| -0.286301118 | 1.48E-09    | -0.173277794 | 0.000306138 | 0.091640187  |
| 0.360525878  | 1.21E-14    | 0.207067077  | 1.50E-05    | -0.019648618 |
| 0.53467772   | 3.65E-33    | 0.28139326   | 2.88E-09    | 0.029689832  |
| 0.528003835  | 3.06E-32    | 0.424159354  | 3.31E-20    | -0.077956774 |
| 0.140213993  | 0.003574233 | 0.158148167  | 0.000999684 | -0.027030128 |
| 0.291404226  | 7.31E-10    | 0.058917109  | 0.222755312 | 0.02222293   |
| 0.290899273  | 7.84E-10    | 0.215017206  | 6.85E-06    | 0.043892297  |
| 0.268918288  | 1.47E-08    | 0.237364421  | 6.39E-07    | 0.055888129  |
| -0.100126272 | 0.037946066 | 0.095807031  | 0.047090738 | -0.040754014 |
| -0.170045926 | 0.000397542 | 0.062103657  | 0.198687075 | 0.050371554  |
| 0.160477801  | 0.000838623 | -0.005688711 | 0.906367812 | -0.017062862 |
| -0.212760578 | 8.58E-06    | -0.247336014 | 2.05E-07    | 0.059537552  |
| -0.370269705 | 2.03E-15    | -0.194600379 | 4.86E-05    | 0.19637193   |
| -0.414884605 | 2.55E-19    | -0.187382465 | 9.27E-05    | 0.103514094  |
| 0.438533089  | 1.23E-21    | 0.358655453  | 1.69E-14    | 0.00415689   |
| 0.428838058  | 1.15E-20    | 0.156040911  | 0.001169481 | 0.015812821  |
| 0.152962702  | 0.001465597 | -0.04075277  | 0.399252066 | -0.064483868 |
| -0.114555151 | 0.01748348  | -0.053246282 | 0.270589474 | 0.004477532  |
| -0.322041721 | 7.83E-12    | -0.2260428   | 2.19E-06    | 0.098515645  |
| 0.601770804  | 1.04E-43    | 0.461467255  | 4.60E-24    | -0.058669481 |
| 0.004749503  | 0.921772166 | 0.012820401  | 0.790942794 | 0.108775021  |
| 0.28240119   | 2.51E-09    | 0.162260441  | 0.000731966 | 0.004522642  |
| 0.651146665  | 3.18E-53    | 0.423078633  | 4.22E-20    | -0.040138865 |
| 0.084597918  | 0.079722971 | 0.019578738  | 0.685587508 | 0.032139928  |
| 0.457368976  | 1.29E-23    | 0.364413982  | 5.97E-15    | -0.018003534 |
| 0.062265037  | 0.19752064  | -0.045089057 | 0.350954533 | 0.090858938  |
| 0.597561679  | 5.67E-43    | 0.314215768  | 2.62E-11    | -0.07525914  |
| -0.237578305 | 6.24E-07    | -0.147797581 | 0.002120843 | 0.021346499  |
| -0.18427144  | 0.000121555 | -0.069923825 | 0.147750542 | 0.068589754  |
| -0.043562597 | 0.367518362 | 0.094509961  | 0.050173576 | -0.075739717 |
| 0.206515938  | 1.58E-05    | 0.128704257  | 0.007535082 | -0.024160054 |
| 0.377162668  | 5.53E-16    | 0.22566207   | 2.28E-06    | -0.034378486 |
| 0.232875782  | 1.05E-06    | 0.054214526  | 0.261960654 | 0.069184983  |
| -0.126799143 | 0.008479843 | 0.214626069  | 7.12E-06    | 0.080392383  |
| -0.205678274 | 1.72E-05    | -0.105516528 | 0.028685718 | 0.061942199  |
| -0.319725449 | 1.12E-11    | -0.039893418 | 0.4092762   | 0.081940688  |
| -0.073118217 | 0.13007023  | 0.064412125  | 0.182474376 | 0.073170071  |

|              |             |              |             |              |
|--------------|-------------|--------------|-------------|--------------|
| -0.141239577 | 0.0033354   | -0.02615989  | 0.588523736 | 0.032979865  |
| -0.32617405  | 4.08E-12    | -0.20776614  | 1.40E-05    | 0.11253138   |
| -0.098335226 | 0.041537031 | 0.08893311   | 0.065410775 | -0.044434538 |
| 0.056683623  | 0.240820522 | -0.05914455  | 0.220971419 | -0.023611514 |
| 0.260162666  | 4.41E-08    | 0.202461647  | 2.34E-05    | 0.007795081  |
| 0.42384503   | 3.55E-20    | 0.235844674  | 7.56E-07    | 0.004138522  |
| 0.359463385  | 1.46E-14    | 0.102233166  | 0.034062011 | 0.012592435  |
| 0.137992888  | 0.004145414 | 0.170903856  | 0.000371072 | -0.05370579  |
| -0.01555406  | 0.747743276 | 0.005117489  | 0.91573286  | 0.067935529  |
| 0.420601167  | 7.31E-20    | 0.202846081  | 2.25E-05    | -0.058112436 |
| -0.033487647 | 0.488568431 | -0.187552156 | 9.13E-05    | -0.012652635 |
| -0.041522231 | 0.390402623 | -0.103275724 | 0.03226878  | 0.001682663  |
| 0.08264913   | 0.086935427 | 0.022288317  | 0.644875884 | 0.1934332    |
| -0.422190731 | 5.14E-20    | -0.152029283 | 0.001568148 | 0.019159058  |
| 0.348945844  | 9.31E-14    | 0.289221571  | 9.90E-10    | -0.050916346 |
| -0.345649952 | 1.64E-13    | -0.159147268 | 0.000927401 | 0.076094801  |
| 0.418049793  | 1.28E-19    | 0.232662037  | 1.07E-06    | 0.004686708  |
| -0.12645775  | 0.008659878 | 0.023295943  | 0.629994803 | -0.04377181  |
| -0.425043885 | 2.72E-20    | -0.116549645 | 0.015604544 | -0.015222324 |
| 0.33861766   | 5.37E-13    | 0.111202523  | 0.021088863 | 0.016579767  |
| -0.268356457 | 1.58E-08    | -0.161379984 | 0.000782968 | -0.002355888 |
| 0.29902894   | 2.48E-10    | 0.200375839  | 2.85E-05    | 0.010652975  |
| 0.408753383  | 9.52E-19    | 0.251890437  | 1.20E-07    | -0.008685185 |
| 0.249692736  | 1.55E-07    | 0.230608249  | 1.34E-06    | 0.004672483  |
| 0.376810852  | 5.91E-16    | 0.270865896  | 1.15E-08    | -0.030478309 |
| 0.324799177  | 5.07E-12    | 0.115597922  | 0.016477824 | 0.015495866  |
| 0.571089554  | 1.38E-38    | 0.370637108  | 1.89E-15    | -0.060822434 |
| -0.353414898 | 4.28E-14    | -0.138992242 | 0.003878918 | 0.113832039  |
| -0.195877857 | 4.32E-05    | -0.049966328 | 0.301251355 | 0.074765528  |
| -0.283096515 | 2.29E-09    | -0.153948408 | 0.001364016 | 0.040142619  |
| -0.352767045 | 4.79E-14    | -0.222081549 | 3.32E-06    | 0.092918575  |
| 0.173799693  | 0.000293363 | 0.176855942  | 0.000228002 | -0.061416657 |
| 0.441478744  | 6.14E-22    | 0.286706632  | 1.40E-09    | -0.043444705 |
| -0.086730363 | 0.072394269 | 0.000225992  | 0.996271795 | -0.092961404 |
| -0.462231924 | 3.79E-24    | -0.252675506 | 1.09E-07    | 0.11579873   |
| -0.415607134 | 2.18E-19    | -0.239151845 | 5.23E-07    | -0.019218514 |
| 0.558939033  | 1.06E-36    | 0.313751994  | 2.81E-11    | -0.086549836 |
| 0.370282466  | 2.02E-15    | 0.168221237  | 0.000459787 | -0.005131796 |
| -0.220536429 | 3.90E-06    | -0.068823592 | 0.154246296 | 0.009372186  |
| -0.376235115 | 6.60E-16    | -0.220741814 | 3.82E-06    | 0.033924203  |
| 0.171070851  | 0.000366115 | 0.226576295  | 2.07E-06    | -0.014684427 |
| -0.001274184 | 0.978982053 | 0.172060139  | 0.00033799  | 0.030497616  |
| -0.35312307  | 4.50E-14    | -0.166964071 | 0.000507821 | 0.078218056  |
| 0.497582344  | 2.80E-28    | 0.331854639  | 1.63E-12    | -0.126497504 |
| 0.137042433  | 0.004414116 | 0.123182417  | 0.010567839 | 0.066269703  |
| 0.527667664  | 3.41E-32    | 0.28568282   | 1.61E-09    | -0.077534069 |
| 0.396418123  | 1.24E-17    | 0.120376151  | 0.012489742 | -0.012893051 |
| -0.229773406 | 1.47E-06    | -0.168626114 | 0.000445241 | -0.033012153 |
| -0.206954534 | 1.52E-05    | 0.033689108  | 0.485955193 | 0.142437858  |
| -0.223221991 | 2.95E-06    | -0.062879574 | 0.193124577 | 0.00694727   |
| 0.456195381  | 1.73E-23    | 0.28115868   | 2.97E-09    | -0.006829711 |

|              |             |              |             |              |
|--------------|-------------|--------------|-------------|--------------|
| 0.277179095  | 5.04E-09    | 0.192359426  | 5.95E-05    | -0.026623861 |
| 0.118675163  | 0.013799337 | 0.082597718  | 0.087132586 | 0.004101518  |
| -0.276799779 | 5.30E-09    | -0.257445549 | 6.15E-08    | 0.060209251  |
| 0.111823639  | 0.020375894 | -0.026543858 | 0.583060581 | 0.020225083  |
| -0.103235571 | 0.032336322 | 0.009049144  | 0.851578574 | 0.00248386   |
| -0.366699904 | 3.93E-15    | -0.188077132 | 8.72E-05    | 0.146741857  |
| 0.302415958  | 1.52E-10    | 0.206728446  | 1.55E-05    | 0.008176484  |
| 0.078637134  | 0.103433697 | -0.011738524 | 0.808226172 | -0.014667607 |
| 0.292283612  | 6.46E-10    | 0.228902363  | 1.61E-06    | 0.036347947  |
| 0.182519827  | 0.000141341 | 0.109923529  | 0.022625488 | 0.11505534   |
| -0.063557525 | 0.188358455 | 0.134760641  | 0.005124519 | 0.045827799  |
| -0.113311239 | 0.01875291  | -0.056585841 | 0.241634256 | -0.090082685 |
| -0.082678669 | 0.086822314 | -0.197327183 | 3.78E-05    | 0.060695951  |
| -0.419788791 | 8.74E-20    | -0.202900004 | 2.24E-05    | 0.032573836  |
| 0.615866972  | 2.97E-46    | 0.46613585   | 1.40E-24    | 0.007522578  |
| -0.272344282 | 9.48E-09    | -0.02931247  | 0.544383772 | 0.038618149  |
| 0.008292282  | 0.863866142 | 0.067081199  | 0.164972466 | -0.046061444 |
| 0.359694446  | 1.40E-14    | 0.076060764  | 0.115274777 | -0.027339384 |
| -0.268345995 | 1.58E-08    | -0.08954734  | 0.063565307 | 0.127392241  |
| 0.177522468  | 0.000215687 | 0.100491024  | 0.037247949 | 0.014554017  |
| 0.057630988  | 0.233036131 | 0.023789846  | 0.622754409 | 0.065214226  |
| -0.057214264 | 0.236438109 | 0.032878834  | 0.496511248 | -0.02784867  |
| 0.076176497  | 0.114721006 | 0.118944809  | 0.013583998 | -0.009078268 |
| 0.212293756  | 8.99E-06    | 0.165610849  | 0.000564708 | 0.216297209  |
| -0.006867963 | 0.887076662 | -0.101374658 | 0.035601752 | 0.022421743  |
| -0.21116089  | 1.01E-05    | -0.070525384 | 0.144288162 | -0.049159675 |
| 0.146829951  | 0.002269985 | 0.055260864  | 0.252850984 | -0.024183128 |
| 0.491690817  | 1.48E-27    | 0.348172771  | 1.06E-13    | -0.179455759 |
| 0.341468892  | 3.33E-13    | 0.127733164  | 0.008004212 | -0.028792582 |
| -0.128771641 | 0.007503459 | -0.136631834 | 0.004534986 | 0.018551727  |
| 0.471887704  | 3.14E-25    | 0.349755063  | 8.10E-14    | 0.007983161  |
| 0.122886889  | 0.010757078 | -0.020003561 | 0.679140246 | 0.036801446  |
| 0.473763707  | 1.92E-25    | 0.168501453  | 0.000449673 | -0.033575234 |
| -0.158251236 | 0.000991994 | -0.145707643 | 0.002454923 | 0.021195896  |
| -0.032567737 | 0.500596279 | 0.118578851  | 0.013876976 | 0.028620087  |
| 0.378653813  | 4.16E-16    | 0.1668929    | 0.000510675 | -0.003369429 |
| 0.414721727  | 2.65E-19    | 0.29413782   | 4.98E-10    | 0.012162407  |
| 0.44275025   | 4.54E-22    | 0.435808925  | 2.32E-21    | 0.053457916  |
| 0.246187863  | 2.34E-07    | 0.077750933  | 0.107392934 | 0.008671485  |
| 0.268990942  | 1.46E-08    | 0.18563771   | 0.000107961 | 0.000264574  |
| 0.301082161  | 1.85E-10    | 0.09285967   | 0.054337893 | -0.012633332 |
| 0.412980376  | 3.86E-19    | 0.357551082  | 2.06E-14    | -0.048309808 |
| -0.235355187 | 7.99E-07    | -0.145395634 | 0.002508724 | 0.070126627  |
| 0.154791084  | 0.00128235  | 0.207853579  | 1.39E-05    | -0.032015444 |
| 0.655715856  | 3.40E-54    | 0.383861688  | 1.52E-16    | -0.063564689 |
| 0.303565747  | 1.29E-10    | 0.158696648  | 0.000959384 | 0.049226765  |
| -0.230592269 | 1.34E-06    | -0.057994867 | 0.23009397  | 0.095083794  |
| 0.390865544  | 3.80E-17    | 0.219966859  | 4.13E-06    | 0.067727097  |
| -0.155240176 | 0.001240688 | -0.071708859 | 0.137657808 | 0.171314083  |
| 0.465161439  | 1.79E-24    | 0.368347243  | 2.90E-15    | -0.043784666 |
| -0.212129553 | 9.14E-06    | 0.051481772  | 0.286809097 | 0.116309689  |

|              |             |              |             |              |
|--------------|-------------|--------------|-------------|--------------|
| 0.208024586  | 1.37E-05    | 0.019083547  | 0.693131555 | 0.073896866  |
| -0.436559941 | 1.95E-21    | -0.242335594 | 3.65E-07    | 0.030769771  |
| -0.455821242 | 1.89E-23    | -0.329382954 | 2.44E-12    | 0.118327989  |
| 0.088240029  | 0.067545784 | 0.249993263  | 1.50E-07    | 0.125848151  |
| 0.24631893   | 2.31E-07    | 0.152268172  | 0.001541293 | 0.01681775   |
| -0.187292513 | 9.34E-05    | -0.007701017 | 0.873488289 | -0.005506776 |
| -0.027205696 | 0.573699599 | 0.089292701  | 0.064325107 | -0.065705381 |
| -0.14925578  | 0.001912944 | -0.13379891  | 0.005453622 | -0.098024822 |
| 0.510006715  | 7.55E-30    | 0.381336317  | 2.48E-16    | -0.035424388 |
| 0.020894363  | 0.665697299 | 0.032164189  | 0.505921638 | 0.085198397  |
| 0.492038932  | 1.34E-27    | 0.227669049  | 1.84E-06    | -0.032506565 |
| 0.170693642  | 0.000377402 | -0.027412176 | 0.570793754 | 0.013105032  |
| 0.554527254  | 4.89E-36    | 0.346887456  | 1.33E-13    | -0.032456723 |
| 0.604329948  | 3.67E-44    | 0.427972626  | 1.40E-20    | -0.081979248 |
| -0.246605296 | 2.23E-07    | -0.160049072 | 0.000866333 | 0.104127793  |
| 0.646242506  | 3.36E-52    | 0.404032815  | 2.58E-18    | -0.055852477 |
| 0.230278126  | 1.39E-06    | 0.071683795  | 0.137795759 | 0.05914081   |
| 0.443604219  | 3.71E-22    | 0.161770689  | 0.000759943 | -0.029274026 |
| -0.039205383 | 0.41740848  | 0.123227846  | 0.010539012 | -0.069136927 |
| 0.233956842  | 9.32E-07    | 0.114195302  | 0.017842758 | -0.001860777 |
| -0.003267526 | 0.946136057 | -0.069957099 | 0.147557391 | 0.129849086  |
| -0.348890766 | 9.40E-14    | -0.046048264 | 0.340791259 | -0.006925249 |
| 0.483946813  | 1.25E-26    | 0.308666725  | 6.05E-11    | -0.074722082 |
| 0.387167287  | 7.93E-17    | 0.217424684  | 5.36E-06    | 0.071113149  |
| -0.23663653  | 6.93E-07    | -0.142198147 | 0.003125366 | 0.083403757  |
| 0.491133475  | 1.73E-27    | 0.259250842  | 4.93E-08    | 0.012097345  |
| 0.498230735  | 2.33E-28    | 0.258755095  | 5.24E-08    | -0.044454507 |
| -0.511478339 | 4.87E-30    | -0.31107828  | 4.22E-11    | 0.097471298  |
| -0.263071334 | 3.07E-08    | -0.064962874 | 0.178755015 | -0.004019291 |
| 0.412525347  | 4.25E-19    | 0.309002907  | 5.76E-11    | -0.034599951 |
| 0.588835337  | 1.76E-41    | 0.346396745  | 1.44E-13    | -0.087664772 |
| -0.37241719  | 1.36E-15    | -0.260275586 | 4.35E-08    | 0.003020321  |
| -0.018318259 | 0.704850061 | 0.038416178  | 0.426852425 | 0.010384996  |
| -0.403896784 | 2.65E-18    | -0.260261692 | 4.35E-08    | 0.02773945   |
| -0.203900361 | 2.04E-05    | 0.102673426  | 0.033294653 | 0.045625072  |
| 0.19404998   | 5.11E-05    | 0.126256345  | 0.008767679 | -0.024908103 |
| -0.092624929 | 0.054952944 | -0.005267495 | 0.913272361 | -0.017917124 |
| 0.01450699   | 0.76420502  | -0.011453358 | 0.812797739 | 0.0022726    |
| -0.20490473  | 1.85E-05    | -0.011512784 | 0.811844541 | 0.078976763  |
| 0.383886537  | 1.51E-16    | 0.147056146  | 0.002234288 | 0.008454019  |
| -0.309728867 | 5.16E-11    | -0.197469688 | 3.73E-05    | 0.06733233   |
| -0.270450803 | 1.21E-08    | -0.099051035 | 0.040068868 | 0.066506476  |
| -0.141308325 | 0.003319921 | -0.096722575 | 0.045011632 | 0.054962201  |
| 0.604535501  | 3.38E-44    | 0.492426836  | 1.20E-27    | -0.074262103 |
| 0.239993009  | 4.76E-07    | 0.107526885  | 0.025767193 | 0.002551734  |
| -0.295308069 | 4.22E-10    | -0.172603712 | 0.000323407 | 0.042823625  |
| 0.260814065  | 4.07E-08    | 0.119266222  | 0.013331188 | -0.031534005 |
| 0.10153382   | 0.035311907 | 0.050051354  | 0.300428494 | -0.064954717 |
| 0.263835115  | 2.80E-08    | 0.185237573  | 0.000111786 | 0.047872428  |
| 0.281547915  | 2.82E-09    | 0.088468184  | 0.066836738 | -0.009522917 |
| 0.542103203  | 3.24E-34    | 0.27821597   | 4.39E-09    | -0.043937467 |

|              |             |              |             |              |
|--------------|-------------|--------------|-------------|--------------|
| 0.390001988  | 4.52E-17    | 0.259716103  | 4.66E-08    | 0.026918918  |
| 0.332256912  | 1.53E-12    | 0.493318487  | 9.37E-28    | 0.055938842  |
| -0.31186322  | 3.75E-11    | -0.137845303 | 0.004186143 | 0.074474975  |
| 0.498595213  | 2.10E-28    | 0.445199789  | 2.53E-22    | -0.091261414 |
| 0.247417144  | 2.03E-07    | 0.244631655  | 2.80E-07    | 8.38E-05     |
| -0.019340895 | 0.689207108 | 0.142323388  | 0.00309883  | -0.094262152 |
| 0.365394762  | 4.99E-15    | 0.199931889  | 2.97E-05    | -0.028993015 |
| -0.387599302 | 7.28E-17    | -0.231244875 | 1.25E-06    | 0.069641006  |
| 0.132286057  | 0.006009908 | 0.017981477  | 0.710029464 | 0.056340403  |
| 0.453119573  | 3.69E-23    | 0.271969906  | 9.95E-09    | 0.007107986  |
| -0.102469657 | 0.033647964 | -0.087351435 | 0.0703663   | 0.032200172  |
| 0.334408043  | 1.08E-12    | 0.180428194  | 0.000168923 | -0.025457075 |
| -0.301473018 | 1.74E-10    | -0.204833162 | 1.86E-05    | 0.126403463  |
| 0.416668209  | 1.73E-19    | 0.144439413  | 0.00268037  | -0.023746696 |
| 0.073133526  | 0.129989623 | -0.105215125 | 0.029146857 | 0.081364593  |
| -0.17787386  | 0.000209448 | -0.018063222 | 0.708771063 | -0.063621938 |
| 0.727274356  | 5.81E-72    | 0.512997743  | 3.09E-30    | -0.119945787 |
| 0.427087707  | 1.72E-20    | 0.242371701  | 3.63E-07    | 0.002690053  |
| 0.503506961  | 5.09E-29    | 0.337613828  | 6.35E-13    | -0.051340574 |
| 0.456054213  | 1.79E-23    | 0.25883474   | 5.19E-08    | -0.060389538 |
| 0.317009307  | 1.71E-11    | 0.220790424  | 3.80E-06    | -0.034059499 |
| -0.052553783 | 0.276878723 | 0.027035309  | 0.576102741 | 0.090019739  |
| 0.428780023  | 1.17E-20    | 0.131441528  | 0.006342134 | -0.037850277 |
| -0.501109817 | 1.02E-28    | -0.341168564 | 3.51E-13    | 0.052533564  |
| -0.43538635  | 2.56E-21    | -0.315203712 | 2.26E-11    | -0.030824646 |
| -0.116822816 | 0.015361505 | -0.087740301 | 0.069120357 | -0.001396758 |
| -0.171736554 | 0.000346959 | -0.089584066 | 0.063456336 | 0.02451303   |
| 0.501549323  | 8.98E-29    | 0.373303042  | 1.15E-15    | 0.072697819  |
| -0.319478062 | 1.17E-11    | -0.18489785  | 0.000115134 | -0.035847232 |
| 0.328265295  | 2.92E-12    | 0.19027426   | 7.17E-05    | 0.016625982  |
| 0.046370783  | 0.337416635 | 0.024889434  | 0.606765693 | -0.05944242  |
| -0.145077619 | 0.002564664 | 0.077251581  | 0.109675999 | 0.056620435  |
| -0.223214196 | 2.95E-06    | -0.046224221 | 0.338947497 | 0.036700921  |
| -0.513412125 | 2.73E-30    | -0.191754032 | 6.28E-05    | 0.098853307  |
| -0.19525919  | 4.57E-05    | -0.049929332 | 0.301609865 | -0.015170998 |
| 0.630276176  | 5.43E-49    | 0.303116445  | 1.37E-10    | -0.053037252 |
| -0.24634633  | 2.30E-07    | -0.095326216 | 0.04821448  | 0.058747768  |
| -0.566416199 | 7.49E-38    | -0.3820894   | 2.14E-16    | 0.013411882  |
| -0.42392975  | 3.49E-20    | 0.090165078  | 0.061752748 | 0.081331731  |
| 0.4662969    | 1.34E-24    | 0.265265066  | 2.34E-08    | -0.000166535 |
| -0.360129412 | 1.30E-14    | -0.087809903 | 0.068899267 | 0.15905611   |
| 0.416427671  | 1.83E-19    | 0.395984273  | 1.35E-17    | -0.009100913 |
| 0.319852469  | 1.10E-11    | 0.189930503  | 7.40E-05    | -0.021891572 |
| 0.644819773  | 6.61E-52    | 0.365915243  | 4.53E-15    | -0.037301261 |
| -0.177782702 | 0.00021105  | -0.038108874 | 0.430563063 | 0.020152911  |
| 0.353378274  | 4.30E-14    | 0.291545087  | 7.17E-10    | -0.002310284 |
| 0.655311953  | 4.15E-54    | 0.369229314  | 2.46E-15    | -0.066713561 |
| -0.093951319 | 0.051552349 | -0.012114261 | 0.802212595 | -0.087355867 |
| 0.323194973  | 6.53E-12    | 0.195794424  | 4.35E-05    | -0.06898039  |
| -0.44702691  | 1.63E-22    | -0.255600605 | 7.69E-08    | 0.1048107    |
| 0.209928324  | 1.14E-05    | 0.144099397  | 0.002743938 | 0.001626249  |



|              |             |              |             |              |
|--------------|-------------|--------------|-------------|--------------|
| -0.382144895 | 2.12E-16    | -0.059897455 | 0.215139016 | 0.083679485  |
| -0.336116136 | 8.13E-13    | -0.150701497 | 0.001725395 | 0.092641547  |
| -0.540253084 | 5.95E-34    | -0.348124464 | 1.07E-13    | 0.141374911  |
| 0.427424678  | 1.59E-20    | 0.173558256  | 0.000299209 | -0.036319962 |
| 0.263525129  | 2.91E-08    | 0.038969881  | 0.420213667 | -0.016350725 |
| 0.290488382  | 8.30E-10    | 0.142948682  | 0.002969382 | 0.005489617  |
| 0.158509586  | 0.000972957 | 0.008279318  | 0.864076898 | 0.011707907  |
| 0.2379361    | 5.99E-07    | 0.217934052  | 5.09E-06    | 0.000304436  |
| 0.210314822  | 1.09E-05    | 0.138546252  | 0.003995872 | 0.006779984  |
| -0.342070379 | 3.01E-13    | -0.2024211   | 2.35E-05    | 0.070223566  |
| -0.219972982 | 4.13E-06    | -0.066714481 | 0.167299613 | 0.015569768  |
| 0.357770791  | 1.98E-14    | 0.157953236  | 0.001014379 | -0.035878351 |
| 0.120397087  | 0.012474331 | 0.153117184  | 0.001449231 | 0.080239976  |
| 0.521299316  | 2.48E-31    | 0.290030044  | 8.85E-10    | 0.048498038  |
| -0.385246327 | 1.16E-16    | -0.360646637 | 1.18E-14    | 0.135638311  |
| 0.272826587  | 8.90E-09    | 0.028050076  | 0.561860826 | 0.123148129  |
| 0.162880827  | 0.000697894 | 0.248736989  | 1.74E-07    | -0.065970397 |
| 0.154110105  | 0.001347985 | 0.000422793  | 0.993025225 | 0.055889994  |
| -0.429735565 | 9.41E-21    | -0.366700394 | 3.93E-15    | -0.034675344 |
| -0.362248923 | 8.85E-15    | -0.009921072 | 0.837467494 | 0.046677555  |
| -0.252083599 | 1.17E-07    | -0.083427715 | 0.083993317 | -0.046578772 |
| 0.379131477  | 3.79E-16    | 0.292827703  | 5.99E-10    | -0.022145955 |
| -0.145257457 | 0.002532891 | -0.24275105  | 3.48E-07    | -0.063316352 |
| 0.321373801  | 8.69E-12    | 0.163664439  | 0.000656958 | 0.000275187  |
| -0.481518592 | 2.42E-26    | -0.318625178 | 1.33E-11    | 0.004760826  |
| -0.292730861 | 6.07E-10    | -0.185276204 | 0.000111411 | -0.011606759 |
| 0.314604219  | 2.47E-11    | 0.252343822  | 1.14E-07    | 0.001861663  |
| -0.219715482 | 4.24E-06    | -0.150285884 | 0.001777508 | 0.028204445  |
| -0.228119513 | 1.75E-06    | -0.015346711 | 0.750994337 | 0.050313027  |
| 0.279220879  | 3.84E-09    | 0.109472188  | 0.023190426 | -0.015663617 |
| -0.124974904 | 0.009481985 | -0.078731204 | 0.103020303 | 0.057632045  |
| 0.060384514  | 0.211425371 | 0.079739012  | 0.098673148 | 0.067430297  |
| -0.139110525 | 0.003848424 | 0.085984342  | 0.074893011 | 0.048900583  |
| 0.394049603  | 2.01E-17    | 0.24945516   | 1.60E-07    | -0.019239661 |
| -0.488147317 | 3.96E-27    | -0.275521939 | 6.26E-09    | 0.078935085  |
| 0.527718003  | 3.35E-32    | 0.377174229  | 5.52E-16    | -0.097825299 |
| -0.454349136 | 2.73E-23    | -0.208877688 | 1.26E-05    | 0.144483919  |
| -0.27603389  | 5.86E-09    | -0.11429532  | 0.017742257 | 0.071441193  |
| -0.325756251 | 4.36E-12    | -0.176398885 | 0.000236823 | 0.031554718  |
| 0.220215871  | 4.03E-06    | 0.236936605  | 6.70E-07    | 0.068986921  |
| 0.373842294  | 1.04E-15    | 0.224072075  | 2.70E-06    | 0.039886809  |
| 0.155735195  | 0.001196211 | 0.058687378  | 0.22456757  | 0.007793097  |
| -0.322531495 | 7.25E-12    | -0.293659377 | 5.33E-10    | 0.10002072   |
| 0.115706301  | 0.016376265 | -0.079422977 | 0.100020361 | -0.038442274 |
| -0.18945623  | 7.72E-05    | -0.00868967  | 0.857410312 | 0.005553168  |
| 0.506789738  | 1.95E-29    | 0.28940281   | 9.65E-10    | -0.059273262 |
| -0.340707621 | 3.79E-13    | -0.170606906 | 0.000380042 | 0.016577109  |
| 0.320757883  | 9.57E-12    | 0.138564145  | 0.003991119 | 0.003424906  |
| -0.45210689  | 4.74E-23    | -0.278038486 | 4.50E-09    | 0.056335402  |
| -0.217030076 | 5.58E-06    | -0.102743376 | 0.033174101 | 0.074240616  |
| -0.399459422 | 6.65E-18    | -0.162503046 | 0.000718463 | 0.095793019  |

|              |             |              |             |              |
|--------------|-------------|--------------|-------------|--------------|
| -0.123136375 | 0.010597126 | -0.174257201 | 0.000282575 | 0.041683124  |
| 0.240475353  | 4.50E-07    | 0.117531749  | 0.014746193 | -0.055729536 |
| 0.36570634   | 4.71E-15    | 0.239177903  | 5.21E-07    | -0.021666121 |
| 0.045745108  | 0.343982851 | -0.093545091 | 0.052574673 | -0.050934247 |
| 0.036451478  | 0.450894695 | -0.144092508 | 0.00274524  | 0.012847147  |
| -0.32484179  | 5.04E-12    | -0.176998848 | 0.000225307 | 0.026467774  |
| 0.423703152  | 3.67E-20    | 0.155033038  | 0.001259747 | -0.04586661  |
| 0.19965246   | 3.04E-05    | 0.01237576   | 0.798034223 | -0.020526738 |
| 0.20159304   | 2.54E-05    | 0.117812619  | 0.014508468 | -0.104819523 |
| 0.21224003   | 9.04E-06    | 0.177092923  | 0.00022355  | -0.006309136 |
| -0.278992966 | 3.96E-09    | -0.243908518 | 3.05E-07    | 0.038952854  |
| -0.220228787 | 4.02E-06    | -0.118783423 | 0.013712523 | 0.033525695  |
| 0.53882632   | 9.50E-34    | 0.305261593  | 1.00E-10    | -0.052843653 |
| -0.374652446 | 8.90E-16    | -0.263700112 | 2.84E-08    | -0.008342626 |
| 0.426811025  | 1.83E-20    | 0.2963767    | 3.63E-10    | -0.046313691 |
| -0.243042885 | 3.36E-07    | -0.205257737 | 1.79E-05    | 0.030332048  |
| 0.539170982  | 8.49E-34    | 0.274143305  | 7.50E-09    | -0.030923949 |
| 0.164248938  | 0.000627885 | 0.156071983  | 0.001166795 | -0.027057874 |
| -0.258207833 | 5.60E-08    | -0.129208888 | 0.007301131 | 0.021503926  |
| -0.238796752 | 5.44E-07    | 0.025537355  | 0.597430951 | 0.041415589  |
| -0.607902421 | 8.44E-45    | -0.39034841  | 4.22E-17    | 0.077748224  |
| -0.428438703 | 1.26E-20    | -0.256591336 | 6.82E-08    | 0.003056711  |
| -0.131715629 | 0.006232544 | -0.02221853  | 0.645911889 | -0.065268341 |
| 0.18313874   | 0.000134027 | -0.049277633 | 0.307971462 | 0.081856861  |
| -0.378316855 | 4.43E-16    | -0.14771523  | 0.002133178 | 0.056590006  |
| 0.114470867  | 0.017567058 | -0.00118357  | 0.980476444 | 0.031217751  |
| -0.473929119 | 1.84E-25    | -0.365728843 | 4.69E-15    | 0.056276455  |
| 0.179785771  | 0.000178359 | 0.004761049  | 0.921582601 | -0.012332246 |
| -0.485418027 | 8.39E-27    | -0.311651339 | 3.87E-11    | 0.078962951  |
| 0.047563924  | 0.325119198 | 0.113924151  | 0.01811772  | -0.017049888 |
| 0.387795673  | 7.00E-17    | 0.292854933  | 5.97E-10    | -0.01833101  |
| -0.107588049 | 0.025682565 | 0.129843217  | 0.007016275 | 0.039556243  |
| 0.187425601  | 9.23E-05    | 0.14045543   | 0.003516653 | 0.013040713  |
| 0.405565923  | 1.87E-18    | 0.194720366  | 4.80E-05    | -0.057706535 |
| 0.338296561  | 5.67E-13    | 0.432123222  | 5.45E-21    | -0.048962891 |
| 0.017198471  | 0.72212272  | 0.018227178  | 0.706249475 | 0.084361886  |
| -0.07831281  | 0.104869032 | -0.185443715 | 0.0001098   | 0.003620149  |
| 0.300450122  | 2.02E-10    | 0.191327758  | 6.53E-05    | -0.050461915 |
| 0.686270827  | 3.75E-61    | 0.407054878  | 1.36E-18    | -0.028570383 |
| -0.381586182 | 2.36E-16    | -0.293777374 | 5.24E-10    | 0.040041094  |
| 0.229939602  | 1.44E-06    | 0.007364302  | 0.878976375 | -0.011126473 |
| -0.429554892 | 9.80E-21    | -0.295715385 | 3.98E-10    | -0.000855709 |
| -0.123230097 | 0.010537585 | -0.072363166 | 0.134093961 | -0.138929204 |
| 0.323171427  | 6.55E-12    | 0.213953864  | 7.62E-06    | -0.023585114 |
| -0.174455548 | 0.000278014 | -0.091436712 | 0.058155606 | -0.031571565 |
| -0.177470135 | 0.000216631 | -0.113106879 | 0.018968971 | -0.068201392 |
| 0.085119621  | 0.077876686 | -0.051794422 | 0.28388849  | 0.092490762  |
| 0.347324751  | 1.23E-13    | 0.134101534  | 0.00534807  | 0.121615771  |
| -0.381305685 | 2.49E-16    | -0.145409879 | 0.002506244 | 0.0939027    |
| -0.426278697 | 2.06E-20    | -0.255604441 | 7.68E-08    | 0.14477993   |
| -0.267303811 | 1.81E-08    | -0.088953599 | 0.065348514 | 0.091553033  |

|              |             |              |             |              |
|--------------|-------------|--------------|-------------|--------------|
| -0.2300795   | 1.42E-06    | -0.002969518 | 0.951042136 | 0.007428876  |
| -0.285230795 | 1.71E-09    | -0.176828984 | 0.000228513 | 0.012889186  |
| -0.514198512 | 2.15E-30    | -0.345112568 | 1.80E-13    | 0.127009115  |
| 0.429331543  | 1.03E-20    | 0.444269105  | 3.16E-22    | 0.013688786  |
| 0.384322082  | 1.39E-16    | 0.255705159  | 7.59E-08    | -0.061857448 |
| 0.264102946  | 2.70E-08    | 0.0473245    | 0.327563287 | 0.079632035  |
| -0.035127928 | 0.46751263  | 0.080309586  | 0.096277464 | 0.01017405   |
| 0.335394036  | 9.16E-13    | 0.193217158  | 5.51E-05    | -0.025773981 |
| 0.060203232  | 0.21280214  | 0.049577725  | 0.305031182 | 0.061089756  |
| 0.637214989  | 2.31E-50    | 0.423722708  | 3.65E-20    | -0.056058102 |
| 0.339392145  | 4.72E-13    | 0.15833848   | 0.000985527 | -0.009689069 |
| 0.318585599  | 1.34E-11    | 0.115900292  | 0.016195851 | -0.048657242 |
| 0.456134594  | 1.75E-23    | 0.399721052  | 6.30E-18    | -0.104504111 |
| -0.282996908 | 2.32E-09    | -0.228406081 | 1.70E-06    | 0.118900764  |
| -0.231227084 | 1.26E-06    | -0.050839409 | 0.292872966 | 0.043451384  |
| 0.394069748  | 2.00E-17    | 0.363447984  | 7.12E-15    | -0.073457752 |
| 0.11292798   | 0.01915989  | 0.033663926  | 0.486281428 | 0.096167917  |
| -0.182062068 | 0.000146989 | -0.070248598 | 0.145873479 | -0.014578991 |
| -0.185029705 | 0.000113823 | -0.153455995 | 0.001413924 | 0.056451478  |
| 0.331749132  | 1.66E-12    | 0.1335004    | 0.005559571 | 0.026056397  |
| -0.345714512 | 1.62E-13    | -0.120634277 | 0.012300906 | 0.211444484  |
| 0.134564906  | 0.005190012 | 0.037913088  | 0.432936841 | -0.013327088 |
| 0.140376817  | 0.003535309 | 0.078108129  | 0.105782953 | -0.001763326 |
| 0.208153982  | 1.35E-05    | 0.052903952  | 0.273686197 | -0.040511629 |
| -0.112852473 | 0.019240971 | 0.032867103  | 0.496664971 | 0.066627953  |
| 0.203935489  | 2.03E-05    | 0.051502126  | 0.286618353 | 0.055065676  |
| 0.54569153   | 9.82E-35    | 0.551738632  | 1.27E-35    | -0.02211624  |
| 0.19418124   | 5.04E-05    | 0.101925439  | 0.03460727  | -0.028876512 |
| -0.433020994 | 4.43E-21    | -0.255031097 | 8.23E-08    | 0.180821623  |
| -0.047923156 | 0.321474313 | 0.247785668  | 1.94E-07    | 0.038270196  |
| 0.359231556  | 1.52E-14    | 0.169317262  | 0.000421393 | 0.013175347  |
| 0.169188184  | 0.000425754 | 0.264018328  | 2.73E-08    | -0.000151595 |
| -0.358639318 | 1.69E-14    | -0.104170729 | 0.030794258 | 0.134915466  |
| -0.325244021 | 4.72E-12    | -0.216841583 | 5.69E-06    | 0.0091528    |
| 0.067067925  | 0.165056279 | -0.064529882 | 0.181674364 | 0.041626651  |
| -0.139060097 | 0.003861398 | -0.081737899 | 0.090483461 | -0.078508955 |
| 0.664031663  | 5.24E-56    | 0.415684176  | 2.15E-19    | -0.15306012  |
| 0.560003818  | 7.29E-37    | 0.295147114  | 4.32E-10    | -0.058950702 |
| -0.230982597 | 1.29E-06    | -0.287780022 | 1.21E-09    | -0.050165089 |
| 0.374086059  | 9.91E-16    | 0.264082111  | 2.71E-08    | 0.029884287  |
| -0.317746285 | 1.53E-11    | -0.132335805 | 0.005990835 | 0.130024912  |
| 0.534350032  | 4.06E-33    | 0.371412501  | 1.64E-15    | -0.076857437 |
| 0.771087651  | 6.18E-86    | 0.436844404  | 1.83E-21    | -0.086181919 |
| -0.2388557   | 5.41E-07    | 0.033518533  | 0.488167308 | -0.003527764 |
| -0.488543648 | 3.55E-27    | -0.268013039 | 1.65E-08    | -0.0304067   |
| 0.240153571  | 4.67E-07    | 0.155198057  | 0.001244542 | -0.046587757 |
| -0.012724547 | 0.792470106 | 0.055010027  | 0.255014533 | 0.035392249  |
| -0.520896521 | 2.80E-31    | -0.350974062 | 6.55E-14    | 0.07132425   |
| -0.299373452 | 2.36E-10    | -0.303784881 | 1.24E-10    | 0.06097579   |
| 0.223607929  | 2.83E-06    | -0.007110192 | 0.883121948 | 0.090593607  |
| 0.257824939  | 5.87E-08    | 0.180364196  | 0.000169841 | -0.019812319 |

|              |             |              |             |              |
|--------------|-------------|--------------|-------------|--------------|
| -0.422246679 | 5.07E-20    | -0.187413973 | 9.24E-05    | 0.097441213  |
| -0.325660152 | 4.42E-12    | -0.216615029 | 5.82E-06    | 0.086224562  |
| -0.101219466 | 0.035886312 | -0.187380809 | 9.27E-05    | 0.038134193  |
| -0.398401356 | 8.27E-18    | -0.189908445 | 7.41E-05    | 0.157135685  |
| 0.179978521  | 0.000175477 | 0.040943042  | 0.397052661 | 0.037128961  |
| 0.379487001  | 3.54E-16    | 0.29832236   | 2.75E-10    | -0.016815079 |
| -0.381200873 | 2.54E-16    | -0.342387767 | 2.85E-13    | -0.021986358 |
| 0.516073747  | 1.22E-30    | 0.213908581  | 7.65E-06    | -0.066182952 |
| 0.081016567  | 0.093373631 | 0.04607899   | 0.340468839 | 0.109345816  |
| 0.187837741  | 8.90E-05    | 0.195699738  | 4.39E-05    | 0.025721634  |
| 0.231361932  | 1.24E-06    | 0.11325395   | 0.018813262 | -0.033322535 |
| -0.188189344 | 8.63E-05    | -0.123135342 | 0.010597784 | 0.005099006  |
| 0.288425336  | 1.10E-09    | 0.139148675  | 0.003838636 | -0.090266706 |
| -0.369714602 | 2.25E-15    | -0.134505639 | 0.005209991 | 0.129721935  |
| -0.46703431  | 1.11E-24    | -0.226874425 | 2.00E-06    | 0.104618856  |
| 0.32156746   | 8.43E-12    | 0.069121459  | 0.15246672  | 0.008740759  |
| -0.136262775 | 0.004646168 | 0.073710744  | 0.12697851  | 0.009797632  |
| 0.093692415  | 0.052201979 | 0.074371185  | 0.123599922 | 0.078431369  |
| 0.251387984  | 1.27E-07    | 0.066120486  | 0.171121051 | -0.020456344 |
| 0.319723794  | 1.12E-11    | 0.19494123   | 4.71E-05    | 0.003007608  |
| 0.664269315  | 4.64E-56    | 0.571529367  | 1.18E-38    | -0.065274295 |
| 0.450368913  | 7.25E-23    | 0.191342385  | 6.52E-05    | -0.008075556 |
| 0.243224721  | 3.29E-07    | 0.128571249  | 0.00759785  | -0.049540203 |
| 0.255265926  | 8.00E-08    | 0.174689697  | 0.000272718 | -0.042564392 |
| 0.510700622  | 6.14E-30    | 0.202640977  | 2.30E-05    | -0.045802688 |
| 0.101358582  | 0.035631139 | 0.115478379  | 0.016590482 | -0.0497849   |
| -0.00753232  | 0.876237122 | 0.040102447  | 0.40682429  | -0.093701075 |
| -0.162697634 | 0.000707799 | 0.068478495  | 0.156327662 | -0.008971859 |
| 0.384373125  | 1.37E-16    | 0.354451565  | 3.56E-14    | -0.052493743 |
| 0.509640961  | 8.41E-30    | 0.259014561  | 5.07E-08    | -0.031726122 |
| 0.039194182  | 0.417541656 | -0.013722665 | 0.776606355 | 0.276181009  |
| 0.014744251  | 0.76046525  | 0.003818281  | 0.937074479 | -0.049935813 |
| 0.463703382  | 2.60E-24    | 0.318677825  | 1.32E-11    | -0.007240298 |
| 0.272471311  | 9.32E-09    | 0.176271897  | 0.00023933  | 0.138226898  |
| -0.276551865 | 5.47E-09    | -0.10574112  | 0.028346181 | 0.100222248  |
| 0.363782835  | 6.70E-15    | 0.201190212  | 2.64E-05    | -0.128045281 |
| -0.508358786 | 1.23E-29    | -0.407755002 | 1.18E-18    | -0.014881548 |
| -0.24762364  | 1.98E-07    | -0.178724718 | 0.000195034 | -0.075824904 |
| -0.526812152 | 4.46E-32    | -0.268642157 | 1.52E-08    | 0.104947358  |
| 0.310618044  | 4.52E-11    | 0.121948864  | 0.011377774 | 0.078525824  |
| -0.280936032 | 3.06E-09    | -0.020585577 | 0.670345302 | 0.069094522  |
| 0.072567314  | 0.132996691 | -0.115679462 | 0.016401364 | 0.104539491  |
| 0.700016499  | 1.43E-64    | 0.413110289  | 3.75E-19    | 0.008599084  |
| 0.440758758  | 7.28E-22    | 0.389543847  | 4.95E-17    | -0.023052752 |
| 0.565997023  | 8.70E-38    | 0.253754704  | 9.60E-08    | -0.046806854 |
| 0.068495947  | 0.156221897 | -0.034371784 | 0.477156221 | 0.07091165   |
| 0.187688467  | 9.02E-05    | 0.103107814  | 0.032552025 | -0.019976518 |
| -0.128714384 | 0.007530321 | -0.076208473 | 0.114568374 | 0.039115676  |
| -0.330790269 | 1.94E-12    | -0.094305732 | 0.050674014 | 0.133120648  |
| 0.198811833  | 3.29E-05    | 0.019253533  | 0.69053841  | -0.013288537 |
| 0.106852973  | 0.02671566  | 0.117732358  | 0.014576054 | 0.03394107   |

|               |              |               |              |               |
|---------------|--------------|---------------|--------------|---------------|
| 0. 576236567  | 2. 08E-39    | 0. 335370417  | 9. 20E-13    | -0. 058234841 |
| 0. 131634463  | 0. 006264817 | 0. 013096065  | 0. 786554941 | 0. 06065738   |
| 0. 314346063  | 2. 57E-11    | 0. 24394296   | 3. 03E-07    | 0. 067756935  |
| 0. 271401316  | 1. 07E-08    | 0. 218092794  | 5. 01E-06    | 0. 000365566  |
| 0. 266079679  | 2. 11E-08    | 0. 077930407  | 0. 106581597 | 0. 029578483  |
| 0. 448625007  | 1. 11E-22    | 0. 318288458  | 1. 40E-11    | -0. 01227685  |
| 0. 683541848  | 1. 70E-60    | 0. 533919836  | 4. 66E-33    | -0. 087566865 |
| -0. 297205989 | 3. 22E-10    | -0. 233882144 | 9. 39E-07    | 0. 081845197  |
| 0. 195832493  | 4. 34E-05    | 0. 068376348  | 0. 156947786 | -0. 03103488  |
| 0. 355897342  | 2. 76E-14    | 0. 224999321  | 2. 44E-06    | 0. 012565135  |
| -0. 372264207 | 1. 40E-15    | -0. 185385359 | 0. 000110359 | 0. 024989818  |
| -0. 291190831 | 7. 53E-10    | -0. 098313017 | 0. 041583298 | 0. 118038616  |
| 0. 110211785  | 0. 022270951 | -0. 008657161 | 0. 857938079 | -0. 030727405 |
| 0. 165285549  | 0. 000579238 | 0. 006655007  | 0. 890555778 | 0. 093772864  |
| 0. 435188733  | 2. 68E-21    | 0. 445387961  | 2. 42E-22    | 0. 028782748  |
| 0. 34073009   | 3. 77E-13    | 0. 266161856  | 2. 09E-08    | -0. 016182988 |
| 0. 326211062  | 4. 05E-12    | 0. 162343766  | 0. 000727302 | -0. 052453306 |
| 0. 231916568  | 1. 16E-06    | 0. 146819302  | 0. 002271678 | 0. 012760212  |
| 0. 406174344  | 1. 64E-18    | 0. 188372451  | 8. 49E-05    | -0. 023957391 |
| 0. 450239507  | 7. 48E-23    | 0. 308762933  | 5. 97E-11    | -0. 049503785 |
| 0. 479874028  | 3. 77E-26    | 0. 357264726  | 2. 16E-14    | 0. 025860865  |
| 0. 411521949  | 5. 27E-19    | 0. 215893491  | 6. 27E-06    | -0. 030869784 |
| -0. 246183349 | 2. 34E-07    | -0. 111781526 | 0. 020423564 | 0. 087687852  |
| -0. 392289329 | 2. 86E-17    | -0. 303581023 | 1. 28E-10    | 0. 027261541  |
| -0. 162059884 | 0. 000743305 | 0. 06788031   | 0. 159985645 | -0. 088306852 |
| -0. 280565739 | 3. 21E-09    | -0. 060182968 | 0. 212956443 | 0. 098448222  |
| 0. 203257626  | 2. 17E-05    | 0. 026692166  | 0. 58095676  | 0. 033564983  |
| 0. 379515779  | 3. 52E-16    | 0. 232813343  | 1. 06E-06    | 0. 071044115  |
| 0. 678650134  | 2. 44E-59    | 0. 365427274  | 4. 96E-15    | -0. 109119714 |
| -0. 129358125 | 0. 007233199 | -0. 140596842 | 0. 00348332  | 0. 058434907  |
| 0. 328972619  | 2. 60E-12    | 0. 245342174  | 2. 58E-07    | 0. 031515699  |
| 0. 573376078  | 5. 99E-39    | 0. 321823967  | 8. 10E-12    | -0. 035888039 |
| 0. 404712018  | 2. 23E-18    | 0. 109259575  | 0. 023460753 | -0. 013314687 |
| 0. 322460561  | 7. 33E-12    | 0. 259760618  | 4. 63E-08    | 0. 039838836  |
| -0. 046038575 | 0. 340892971 | -0. 042030888 | 0. 384618404 | -0. 028962663 |
| 0. 293575     | 5. 39E-10    | 0. 183591788  | 0. 000128901 | 0. 001213303  |
| -0. 254243295 | 9. 05E-08    | -0. 211722063 | 9. 52E-06    | 0. 082759972  |
| -0. 156991641 | 0. 001089829 | 0. 014651909  | 0. 761920111 | 0. 075105203  |
| 0. 357582189  | 2. 05E-14    | 0. 185501736  | 0. 000109247 | 0. 050661827  |
| -0. 058404508 | 0. 226813407 | -0. 10241811  | 0. 033737845 | 0. 022718191  |
| 0. 496462961  | 3. 85E-28    | 0. 34230306   | 2. 90E-13    | -0. 099193114 |
| 0. 314647012  | 2. 46E-11    | 0. 305706237  | 9. 39E-11    | 0. 017589405  |
| 0. 07348598   | 0. 128144515 | -0. 060202899 | 0. 21280468  | 0. 068548528  |
| -0. 117134781 | 0. 015088016 | -0. 106097358 | 0. 027814701 | 0. 01067939   |
| 0. 098668986  | 0. 040846918 | 0. 071559192  | 0. 138483145 | 0. 049495976  |
| -0. 204247821 | 1. 97E-05    | -0. 035434741 | 0. 463630561 | 0. 112280968  |
| 0. 231535888  | 1. 21E-06    | 0. 154485577  | 0. 001311424 | 0. 017319866  |
| 0. 259941972  | 4. 53E-08    | 0. 095790947  | 0. 047127972 | 0. 011760252  |
| 0. 167747683  | 0. 000477362 | 0. 178024106  | 0. 000206832 | -0. 018748013 |
| 0. 411603191  | 5. 18E-19    | 0. 124092109  | 0. 010003712 | -0. 038280516 |
| 0. 357111687  | 2. 22E-14    | 0. 198192208  | 3. 49E-05    | 0. 148067072  |

|              |             |              |             |              |
|--------------|-------------|--------------|-------------|--------------|
| -0.118706488 | 0.013774168 | -0.010288528 | 0.831535953 | 0.006133053  |
| -0.148100111 | 0.002076085 | 0.001005463  | 0.983413948 | -0.070230731 |
| -0.022529058 | 0.641307302 | 0.120030859  | 0.012746344 | -0.047418069 |
| -0.176802431 | 0.000229018 | 0.02396227   | 0.620235248 | 0.075800993  |
| 0.010146223  | 0.833831945 | 0.128574423  | 0.007596347 | 0.04840902   |
| -0.593930939 | 2.39E-42    | -0.393100277 | 2.43E-17    | 0.025340998  |
| 0.24952183   | 1.59E-07    | 0.236233301  | 7.25E-07    | -0.02835594  |
| 0.268331781  | 1.59E-08    | 0.124208702  | 0.009933377 | 0.066542591  |
| 0.180625078  | 0.000166126 | -0.016840222 | 0.727679119 | 0.000997218  |
| 0.463730102  | 2.59E-24    | 0.423123017  | 4.18E-20    | -0.021376353 |
| 0.518389996  | 6.05E-31    | 0.270095741  | 1.27E-08    | -0.047695141 |
| 0.466906637  | 1.15E-24    | 0.237802073  | 6.08E-07    | -0.022845471 |
| 0.431118233  | 6.86E-21    | 0.348290097  | 1.04E-13    | 0.011554504  |
| 0.544527984  | 1.45E-34    | 0.541977448  | 3.37E-34    | -0.073330333 |
| 0.468952197  | 6.75E-25    | 0.175107272  | 0.000263507 | -0.028962404 |
| 0.679291384  | 1.73E-59    | 0.373387742  | 1.13E-15    | -0.083399071 |
| -0.506137082 | 2.36E-29    | -0.278060983 | 4.48E-09    | 0.203738854  |
| 0.30678342   | 8.01E-11    | 0.359272445  | 1.51E-14    | 0.026526379  |
| 0.143545007  | 0.002850531 | -0.045246761 | 0.349270559 | 0.021401222  |
| 0.268554985  | 1.54E-08    | 0.26803288   | 1.65E-08    | 0.045813674  |
| 0.533457477  | 5.41E-33    | 0.36697204   | 3.73E-15    | -0.027149691 |
| -0.367142649 | 3.62E-15    | -0.238850127 | 5.41E-07    | 0.003875934  |
| 0.021926594  | 0.650253148 | -0.149880595 | 0.00182971  | 0.050177872  |
| 0.107525365  | 0.025769299 | 0.055929308  | 0.247147809 | 0.091756832  |
| 0.589962688  | 1.13E-41    | 0.308512215  | 6.19E-11    | -0.051156876 |
| 0.577796061  | 1.17E-39    | 0.389496024  | 5.00E-17    | -0.074653135 |
| 0.194971199  | 4.69E-05    | 0.256593902  | 6.82E-08    | 0.057820131  |
| -0.189772863 | 7.50E-05    | -0.192535545 | 5.86E-05    | -0.067181572 |
| 0.273604627  | 8.05E-09    | 0.084732533  | 0.079243213 | -0.052311821 |
| 0.075965423  | 0.115732546 | 0.018426749  | 0.703184486 | 0.066099483  |
| -0.353594947 | 4.14E-14    | -0.222053691 | 3.33E-06    | 0.053301067  |
| 0.546311462  | 7.98E-35    | 0.482283419  | 1.97E-26    | -0.054802654 |
| 0.057603716  | 0.233257706 | 0.050612988  | 0.295030662 | 0.179221609  |
| -0.449516596 | 8.92E-23    | -0.135746485 | 0.004805833 | 0.08681106   |
| -0.327695637 | 3.20E-12    | -0.173828916 | 0.000292662 | 0.02411308   |
| 0.055715863  | 0.248959087 | 0.053163366  | 0.271337329 | 0.039500189  |
| 0.278429782  | 4.27E-09    | 0.252043881  | 1.18E-07    | -0.05015108  |
| 0.238950531  | 5.35E-07    | 0.088790372  | 0.06584588  | -0.027979004 |
| 0.500083234  | 1.37E-28    | 0.320214903  | 1.04E-11    | -0.013543598 |
| 0.374681174  | 8.86E-16    | 0.160673743  | 0.000826234 | -0.034553277 |
| -0.144485345 | 0.002671887 | -0.003706352 | 0.938915427 | 0.012951675  |
| 0.684457724  | 1.02E-60    | 0.435731217  | 2.37E-21    | -0.086883383 |
| 0.415675372  | 2.15E-19    | 0.344493958  | 2.00E-13    | -0.024016987 |
| 0.129726752  | 0.007067818 | -0.048539395 | 0.315283935 | 0.109855901  |
| -0.138660021 | 0.003965738 | -0.048266259 | 0.318018009 | 0.049209685  |
| 0.214033932  | 7.56E-06    | 0.143475927  | 0.002864074 | 0.026954973  |
| 0.585986755  | 5.26E-41    | 0.374365291  | 9.40E-16    | -0.110499962 |
| -0.41883306  | 1.08E-19    | -0.323890921 | 5.85E-12    | 0.065283495  |
| 0.558094574  | 1.42E-36    | 0.304968829  | 1.05E-10    | -0.060375278 |
| 0.040244986  | 0.405157331 | 0.091376726  | 0.058321304 | -0.054234684 |
| -0.407606268 | 1.21E-18    | -0.188265585 | 8.57E-05    | 0.141436978  |

|              |             |              |             |              |
|--------------|-------------|--------------|-------------|--------------|
| 0.474754035  | 1.48E-25    | 0.428167825  | 1.34E-20    | 0.01052496   |
| 0.059333443  | 0.219497645 | -0.090351227 | 0.061214985 | 0.020023721  |
| 0.147757094  | 0.002126899 | -0.006970405 | 0.885403816 | 0.050600223  |
| 0.23822647   | 5.80E-07    | 0.130979705  | 0.006530691 | -0.023139517 |
| 0.48946773   | 2.75E-27    | 0.206954722  | 1.52E-05    | -0.039485144 |
| 0.143275757  | 0.002903648 | 0.135889553  | 0.004761101 | 0.031256207  |
| 0.102899912  | 0.03290567  | 0.038000449  | 0.43187671  | 0.005583368  |
| 0.519361781  | 4.49E-31    | 0.400924878  | 4.92E-18    | -0.033251584 |
| -0.049228508 | 0.308454565 | -0.196737202 | 3.99E-05    | -0.079223752 |
| -0.483871793 | 1.28E-26    | -0.296763157 | 3.43E-10    | -0.041931786 |
| 0.522606407  | 1.65E-31    | 0.280698175  | 3.16E-09    | -0.018415849 |
| 0.447885325  | 1.33E-22    | 0.4774901    | 7.15E-26    | -0.016448676 |
| -0.326222731 | 4.04E-12    | -0.199332948 | 3.14E-05    | 0.126456059  |
| 0.534785809  | 3.53E-33    | 0.466187033  | 1.38E-24    | -0.036319583 |
| 0.210575454  | 1.07E-05    | 0.190008759  | 7.35E-05    | -0.142847993 |
| -0.194757677 | 4.79E-05    | -0.036166441 | 0.454445095 | -0.033336581 |
| 0.169957483  | 0.000400368 | 0.057601696  | 0.23327412  | 0.004469745  |
| 0.038371065  | 0.427395995 | 0.009250824  | 0.848310248 | 0.049229003  |
| 0.227467502  | 1.88E-06    | 0.075751244  | 0.116766098 | 0.029231067  |
| 0.468611384  | 7.38E-25    | 0.345919769  | 1.57E-13    | -0.03853316  |
| -0.11464971  | 0.017390127 | -0.210468154 | 1.08E-05    | 0.09626329   |
| 0.336017643  | 8.27E-13    | 0.272464719  | 9.33E-09    | -0.094455595 |
| -0.182802751 | 0.000137952 | -0.046392145 | 0.33719388  | 0.074051462  |
| 0.603188851  | 5.85E-44    | 0.471870194  | 3.16E-25    | -0.099929628 |
| -0.305677592 | 9.43E-11    | -0.17600915  | 0.000244596 | 0.18789374   |
| 0.358781114  | 1.65E-14    | 0.136792522  | 0.004487332 | -0.041280592 |
| 0.179928736  | 0.000176217 | 0.083481546  | 0.083792907 | -0.02522021  |
| 0.328275081  | 2.91E-12    | 0.211771544  | 9.47E-06    | 0.019090146  |
| 0.36215127   | 9.00E-15    | 0.174997157  | 0.000265907 | -0.056756963 |
| 0.237667207  | 6.18E-07    | 0.052716617  | 0.275391015 | -0.007470459 |
| 0.6119446    | 1.56E-45    | 0.446249599  | 1.97E-22    | -0.064095271 |
| -0.106754067 | 0.02685736  | 0.042644121  | 0.377714845 | 0.063379742  |
| 0.186800916  | 9.75E-05    | 0.114337249  | 0.017700273 | 0.105936345  |
| -0.220771947 | 3.80E-06    | -0.060430205 | 0.211079377 | 0.112982981  |
| -0.037955744 | 0.432419023 | -0.044512555 | 0.357154004 | 0.02887479   |
| 0.3845891    | 1.32E-16    | 0.238420598  | 5.68E-07    | -0.041038899 |
| -0.166857991 | 0.000512081 | -0.032541498 | 0.500941645 | 0.045084082  |
| 0.023275828  | 0.630290437 | -0.066671151 | 0.167576199 | 0.036842671  |
| 0.288468038  | 1.10E-09    | 0.139875658  | 0.003656359 | 0.01415885   |
| 0.471646819  | 3.35E-25    | 0.222501302  | 3.18E-06    | -0.01993927  |
| 0.216768502  | 5.73E-06    | 0.023280705  | 0.630218757 | 0.017706212  |
| 0.619032891  | 7.64E-47    | 0.457406413  | 1.28E-23    | -0.136899018 |
| 0.627002599  | 2.34E-48    | 0.379969386  | 3.23E-16    | -0.045843626 |
| 0.400543819  | 5.32E-18    | 0.290527714  | 8.26E-10    | -0.035152477 |
| 0.070013031  | 0.147233141 | 0.057321548  | 0.235558961 | 0.032823228  |
| 0.321890641  | 8.02E-12    | 0.048669332  | 0.313988699 | -0.006012743 |
| 0.488114401  | 3.99E-27    | 0.216786506  | 5.72E-06    | -0.010140599 |
| 0.570377287  | 1.79E-38    | 0.425103957  | 2.68E-20    | -0.031218821 |
| 0.011498312  | 0.812076639 | 0.013404682  | 0.781650545 | -0.053238346 |
| 0.23593834   | 7.49E-07    | 0.242162776  | 3.72E-07    | 0.029365417  |
| 0.471906012  | 3.13E-25    | 0.216226509  | 6.06E-06    | -0.038812895 |

|               |              |               |              |               |
|---------------|--------------|---------------|--------------|---------------|
| 0. 227808493  | 1. 81E-06    | 0. 32316394   | 6. 56E-12    | 0. 042798203  |
| 0. 408865206  | 9. 30E-19    | 0. 209830434  | 1. 15E-05    | -0. 106461066 |
| -0. 220609778 | 3. 87E-06    | -0. 013064944 | 0. 787049967 | -0. 027442824 |
| 0. 069204836  | 0. 151971391 | 0. 045006091  | 0. 351842512 | 0. 036497752  |
| 0. 114833732  | 0. 017209698 | 0. 179519588  | 0. 000182412 | -0. 050570294 |
| 0. 580961888  | 3. 56E-40    | 0. 403094919  | 3. 13E-18    | -0. 025428236 |
| 0. 097055654  | 0. 044274629 | 0. 04872291   | 0. 313455634 | -0. 00158664  |
| 0. 355806841  | 2. 80E-14    | 0. 213437899  | 8. 02E-06    | -0. 094300444 |
| -0. 41221523  | 4. 55E-19    | -0. 236669669 | 6. 90E-07    | 0. 08802643   |
| -0. 057823892 | 0. 231473101 | 0. 040762841  | 0. 399135466 | 0. 039309213  |
| 0. 29964248   | 2. 27E-10    | 0. 181076822  | 0. 000159871 | 0. 010539478  |
| 0. 091069954  | 0. 059174815 | 0. 160543032  | 0. 00083448  | 0. 085143466  |
| 0. 436417598  | 2. 02E-21    | 0. 231021612  | 1. 28E-06    | -0. 085927327 |
| 0. 232714609  | 1. 07E-06    | 0. 138939292  | 0. 003892639 | 0. 186729953  |
| 0. 630963559  | 3. 98E-49    | 0. 37964582   | 3. 44E-16    | -0. 04301912  |
| -0. 255974672 | 7. 35E-08    | -0. 315412862 | 2. 18E-11    | 0. 043431223  |
| 0. 465387452  | 1. 69E-24    | 0. 327510107  | 3. 29E-12    | -0. 006310033 |
| -0. 220422562 | 3. 94E-06    | -0. 112392623 | 0. 01974125  | 0. 017640375  |
| 0. 550142294  | 2. 19E-35    | 0. 252591915  | 1. 10E-07    | -0. 04171413  |
| -0. 254940605 | 8. 32E-08    | -0. 142531829 | 0. 00305512  | 0. 020274401  |
| 0. 47726628   | 7. 59E-26    | 0. 26436361   | 2. 62E-08    | -0. 014453276 |
| 0. 147889365  | 0. 002107172 | -0. 010971056 | 0. 820544072 | 0. 080976101  |
| 0. 072252803  | 0. 134690044 | 0. 179837209  | 0. 000177586 | 0. 022251991  |
| 0. 292055282  | 6. 67E-10    | 0. 277474824  | 4. 85E-09    | -0. 048437044 |
| 0. 312399201  | 3. 46E-11    | 0. 23753498   | 6. 27E-07    | 0. 027998283  |
| -0. 360329975 | 1. 25E-14    | -0. 244736328 | 2. 77E-07    | 0. 007588895  |
| -0. 135489883 | 0. 004887015 | -0. 097409431 | 0. 043502971 | 0. 082021985  |
| 0. 023776296  | 0. 622952564 | -0. 174180039 | 0. 000284368 | -0. 102682188 |
| 0. 235258203  | 8. 07E-07    | 0. 211767529  | 9. 47E-06    | 0. 02145147   |
| -0. 389536208 | 4. 96E-17    | -0. 229335692 | 1. 54E-06    | 0. 002378814  |
| 0. 283913113  | 2. 05E-09    | 0. 271576419  | 1. 05E-08    | 0. 022267359  |
| 0. 577833837  | 1. 15E-39    | 0. 394143409  | 1. 97E-17    | -0. 050025374 |
| -0. 302329622 | 1. 54E-10    | -0. 141658105 | 0. 003242169 | 0. 085646443  |
| 0. 300520919  | 2. 00E-10    | 0. 177093635  | 0. 000223537 | -0. 061526919 |
| 0. 312954973  | 3. 18E-11    | 0. 082664008  | 0. 08687844  | -0. 016263326 |
| 0. 403146827  | 3. 10E-18    | 0. 136518225  | 0. 004568953 | -0. 025210714 |
| -0. 112353636 | 0. 01978418  | -0. 09032827  | 0. 061281095 | -0. 013222247 |
| 0. 12470181   | 0. 009640738 | 0. 020561923  | 0. 670701877 | 0. 014496345  |
| 0. 281455002  | 2. 85E-09    | 0. 227425805  | 1. 89E-06    | -0. 097969197 |
| -0. 480855958 | 2. 90E-26    | -0. 274955751 | 6. 75E-09    | 0. 181570766  |
| -0. 260508229 | 4. 22E-08    | -0. 082219313 | 0. 088594795 | 0. 102194668  |
| 0. 395683599  | 1. 44E-17    | 0. 241064265  | 4. 21E-07    | -0. 015107982 |
| 0. 331427488  | 1. 75E-12    | 0. 159902381  | 0. 000876007 | -0. 05835462  |
| 0. 346545581  | 1. 41E-13    | 0. 234828595  | 8. 46E-07    | -0. 032556796 |
| 0. 334385643  | 1. 08E-12    | 0. 201665156  | 2. 52E-05    | -0. 012525211 |
| -0. 274063513 | 7. 58E-09    | -0. 100489331 | 0. 037251163 | 0. 074338534  |
| 0. 423928268  | 3. 49E-20    | 0. 314131363  | 2. 66E-11    | -0. 056523812 |
| 0. 199443502  | 3. 10E-05    | 0. 088174266  | 0. 067751297 | -0. 006348763 |
| 0. 103887829  | 0. 031253977 | 0. 023303496  | 0. 629883807 | 0. 007430983  |
| 0. 381689946  | 2. 31E-16    | 0. 125139571  | 0. 009387389 | -0. 019731937 |
| 0. 560720821  | 5. 66E-37    | 0. 359990294  | 1. 33E-14    | 0. 000886108  |



|              |             |              |             |              |
|--------------|-------------|--------------|-------------|--------------|
| -0.383569468 | 1.61E-16    | -0.073553051 | 0.127795709 | -0.015660702 |
| -0.16971747  | 0.000408133 | -0.102719696 | 0.033214868 | 0.063529398  |
| 0.399593989  | 6.47E-18    | 0.254050712  | 9.26E-08    | -0.001213853 |
| 0.513865388  | 2.38E-30    | 0.284812077  | 1.81E-09    | -0.002922043 |
| 0.225252608  | 2.38E-06    | 0.137585374  | 0.004258756 | 0.029029891  |
| 0.268501944  | 1.55E-08    | 0.044716565  | 0.354952352 | -0.003407554 |
| 0.293613275  | 5.36E-10    | 0.080694489  | 0.094687719 | -0.073194801 |
| 0.284838937  | 1.81E-09    | 0.164430503  | 0.000619099 | 0.000937793  |
| 0.267714436  | 1.72E-08    | 0.053155483  | 0.271408504 | -0.007584939 |
| -0.171175695 | 0.000363034 | -0.06579003  | 0.173275021 | -0.058552808 |
| -0.410309026 | 6.84E-19    | -0.251146356 | 1.31E-07    | 0.135103808  |
| 0.391534908  | 3.33E-17    | 0.323087808  | 6.64E-12    | -0.030761911 |
| 0.615087041  | 4.14E-46    | 0.286377595  | 1.46E-09    | -0.060571157 |
| 0.314873094  | 2.37E-11    | 0.136497289  | 0.004575238 | 0.017988867  |
| 0.573719374  | 5.28E-39    | 0.346707558  | 1.37E-13    | -0.052378914 |
| 0.235130156  | 8.19E-07    | 0.092618147  | 0.054970798 | 0.035934749  |
| 0.08178012   | 0.09031654  | 0.231340549  | 1.24E-06    | -0.021189697 |
| 0.281829851  | 2.71E-09    | 0.061831766  | 0.200663594 | 0.020740895  |
| 0.253000528  | 1.05E-07    | 0.200817154  | 2.73E-05    | -0.004259006 |
| -0.46780308  | 9.09E-25    | -0.278890413 | 4.02E-09    | 0.044675793  |
| 0.506194396  | 2.32E-29    | 0.336329272  | 7.85E-13    | -0.035705849 |
| 0.141458479  | 0.003286338 | 0.138880611  | 0.003907897 | 0.091353683  |
| 0.15407454   | 0.001351496 | 0.089776301  | 0.06288845  | 0.017296643  |
| 0.275507524  | 6.28E-09    | 0.170366228  | 0.000387461 | -0.041347146 |
| 0.339237986  | 4.84E-13    | 0.149473404  | 0.001883568 | -0.043126192 |
| 0.375115537  | 8.16E-16    | 0.109963726  | 0.022575757 | 0.033348445  |
| -0.071461531 | 0.139023743 | -0.023072316 | 0.633284811 | 0.059079299  |
| 0.277337408  | 4.93E-09    | 0.094304672  | 0.050676622 | -0.046428752 |
| -0.159466119 | 0.000905369 | -0.006810365 | 0.888017442 | 0.127652081  |
| -0.146754487 | 0.00228201  | -0.029501059 | 0.541796189 | 0.032398916  |
| -0.308241007 | 6.45E-11    | -0.16184786  | 0.00075547  | 0.088681554  |
| -0.18858595  | 8.33E-05    | -0.127545663 | 0.008097737 | -0.022399128 |
| 0.229704795  | 1.48E-06    | 0.163089436  | 0.000686772 | 0.009393082  |
| 0.246470301  | 2.27E-07    | 0.193475194  | 5.38E-05    | 0.001783158  |
| -0.48245649  | 1.88E-26    | -0.34015605  | 4.15E-13    | 0.137883912  |
| 0.289597463  | 9.40E-10    | 0.222437645  | 3.20E-06    | -0.023970179 |
| -0.190566299 | 6.99E-05    | -0.090438666 | 0.060963721 | 0.017995056  |
| 0.223146329  | 2.97E-06    | 0.245560491  | 2.52E-07    | -0.103830618 |
| 0.33073339   | 1.96E-12    | 0.311820187  | 3.77E-11    | -0.051111504 |
| -0.308849851 | 5.89E-11    | -0.206538134 | 1.58E-05    | 0.251041289  |
| 0.555364808  | 3.67E-36    | 0.343927265  | 2.20E-13    | -0.058213903 |
| 0.488768592  | 3.33E-27    | 0.230121178  | 1.41E-06    | -0.019106304 |
| 0.728971672  | 1.88E-72    | 0.465499012  | 1.65E-24    | -0.077591597 |
| -0.268777928 | 1.50E-08    | -0.085535791 | 0.076428889 | 0.056169622  |
| 0.032937414  | 0.495744017 | 0.059200258  | 0.220536045 | 0.034797324  |
| 0.661076033  | 2.34E-55    | 0.415850741  | 2.07E-19    | -0.087462533 |
| 0.261358462  | 3.80E-08    | 0.267596329  | 1.74E-08    | -0.002086623 |
| 0.348458387  | 1.01E-13    | 0.124576924  | 0.009714119 | -0.074973725 |
| 0.547768341  | 4.89E-35    | 0.220237722  | 4.02E-06    | -0.010569106 |
| 0.169457284  | 0.000416709 | 0.077310622  | 0.109404087 | 0.013630315  |
| 0.36779736   | 3.21E-15    | 0.244185869  | 2.95E-07    | 0.0135185    |

|              |             |              |             |              |
|--------------|-------------|--------------|-------------|--------------|
| 0.314473078  | 2.52E-11    | 0.103348402  | 0.032146834 | -0.026665557 |
| 0.393970345  | 2.04E-17    | 0.156296192  | 0.001147583 | -0.014522438 |
| 0.214247142  | 7.40E-06    | 0.12653931   | 0.00861656  | 0.001271987  |
| -0.426368116 | 2.02E-20    | -0.185618163 | 0.000108145 | 0.092372209  |
| -0.200917418 | 2.70E-05    | -0.008415526 | 0.861862974 | 0.100913297  |
| -0.34644512  | 1.43E-13    | -0.097882903 | 0.042487975 | 0.040270056  |
| -0.131020102 | 0.006513999 | -0.02853879  | 0.555062922 | 0.002761107  |
| 0.171608656  | 0.000350566 | 0.115179838  | 0.016874779 | -0.020912775 |
| 0.098996641  | 0.040178871 | 0.062837628  | 0.193422337 | 0.072408392  |
| 0.354333494  | 3.64E-14    | 0.187713247  | 9.00E-05    | -0.025306221 |
| 0.40382192   | 2.69E-18    | 0.2748215    | 6.87E-09    | -0.002133843 |
| 0.306553258  | 8.28E-11    | 0.198996788  | 3.24E-05    | -0.026030335 |
| 0.019964002  | 0.679739628 | -0.263140659 | 3.05E-08    | -0.094288481 |
| -0.015657789 | 0.746118564 | -0.074285387 | 0.12403484  | 0.079133644  |
| 0.3229952    | 6.74E-12    | 0.136585671  | 0.00454876  | -0.0153393   |
| 0.454556333  | 2.59E-23    | 0.261024207  | 3.96E-08    | -0.043308508 |
| -0.237522564 | 6.28E-07    | -0.034651132 | 0.47358094  | 0.057467115  |
| 0.089959619  | 0.062350811 | 0.112100031  | 0.020065425 | -0.020331911 |
| -0.342088064 | 3.00E-13    | -0.153999563 | 0.001358926 | 0.134023503  |
| 0.361901232  | 9.42E-15    | 0.207565636  | 1.43E-05    | 0.071207272  |
| 0.347630764  | 1.17E-13    | 0.099051099  | 0.040068737 | 0.017698533  |
| 0.409572645  | 8.00E-19    | 0.179400777  | 0.000184249 | -0.010455086 |
| 0.506385173  | 2.20E-29    | 0.384587118  | 1.32E-16    | -0.029649783 |
| 0.313569957  | 2.89E-11    | 0.184880881  | 0.000115303 | -0.000527057 |
| -0.465961234 | 1.46E-24    | -0.221864924 | 3.40E-06    | 0.053711096  |
| -0.232109343 | 1.14E-06    | -0.025611402 | 0.596368285 | 0.034669528  |
| -0.006634079 | 0.8908978   | 0.136561182  | 0.004556083 | -0.039354515 |
| 0.189792282  | 7.49E-05    | 0.193421625  | 5.40E-05    | 0.028000003  |
| -0.229964303 | 1.44E-06    | -0.16569854  | 0.00056085  | -0.014017351 |
| 0.175585604  | 0.000253313 | 0.050035445  | 0.300582344 | -0.043554734 |
| 0.018093415  | 0.708306455 | -0.007156869 | 0.882360209 | -0.020308437 |
| 0.735112652  | 2.95E-74    | 0.47614183   | 1.02E-25    | -0.082741407 |
| 0.103292482  | 0.032240627 | 0.018833947  | 0.696945699 | -0.008753296 |
| 0.345964955  | 1.55E-13    | 0.253985001  | 9.33E-08    | 0.121460233  |
| 0.649036433  | 8.82E-53    | 0.449324221  | 9.35E-23    | -0.05526574  |
| -0.145227304 | 0.002538194 | 0.174098855  | 0.000286266 | 0.016596744  |
| 0.362750729  | 8.08E-15    | 0.09817353   | 0.041874889 | -0.047918021 |
| 0.649163583  | 8.30E-53    | 0.42225423   | 5.07E-20    | -0.025223841 |
| -0.315727687 | 2.08E-11    | -0.084812996 | 0.078957567 | 0.052058609  |
| -0.261734489 | 3.63E-08    | -0.080987722 | 0.093490721 | 0.021047529  |
| 0.241144149  | 4.18E-07    | 0.218252416  | 4.93E-06    | 0.00625931   |
| 0.416650683  | 1.74E-19    | 0.388190747  | 6.48E-17    | 0.00298781   |
| 0.221267514  | 3.61E-06    | 0.136073808  | 0.004704043 | -0.018410467 |
| 0.208957353  | 1.25E-05    | 0.236203343  | 7.27E-07    | 0.015293939  |
| -0.335542147 | 8.94E-13    | -0.101127223 | 0.036056364 | 0.106344007  |
| 0.40234083   | 3.66E-18    | 0.30080676   | 1.92E-10    | -0.027802868 |
| -0.296299758 | 3.67E-10    | -0.163460414 | 0.000667397 | 0.079913625  |
| 0.519610618  | 4.16E-31    | 0.306903033  | 7.87E-11    | -0.042488865 |
| 0.289524363  | 9.49E-10    | 0.120480507  | 0.012413093 | -0.045635396 |
| -0.140810674 | 0.003433461 | -0.089702237 | 0.063106744 | 0.003692048  |
| 0.093114972  | 0.053675476 | -0.058038713 | 0.229741233 | 0.101566139  |

|              |             |              |             |              |
|--------------|-------------|--------------|-------------|--------------|
| 0.006544662  | 0.89235934  | -0.104495236 | 0.030274063 | 0.083395012  |
| -0.351737677 | 5.73E-14    | -0.232726908 | 1.07E-06    | 0.009533351  |
| 0.400710694  | 5.14E-18    | 0.231774754  | 1.18E-06    | -0.017695971 |
| 0.116515677  | 0.015635    | -0.002760604 | 0.954482593 | -0.06454661  |
| 0.271739053  | 1.02E-08    | 0.195722723  | 4.38E-05    | -0.081544005 |
| 0.434289949  | 3.31E-21    | 0.211132755  | 1.01E-05    | -0.037853101 |
| -0.34018357  | 4.14E-13    | -0.192837535 | 5.70E-05    | 0.125084905  |
| -0.26448083  | 2.58E-08    | -0.253178278 | 1.03E-07    | 0.052003744  |
| 0.21344337   | 8.02E-06    | 0.049612239  | 0.304694212 | -0.010288654 |
| -0.336558434 | 7.56E-13    | -0.165470747 | 0.000570924 | -0.025103391 |
| 0.505770785  | 2.63E-29    | 0.310914045  | 4.32E-11    | -0.088964058 |
| 0.662428006  | 1.18E-55    | 0.286733196  | 1.39E-09    | -0.063653122 |
| -0.196995948 | 3.90E-05    | -0.073388685 | 0.12865182  | -0.004283689 |
| -0.205405671 | 1.76E-05    | 0.059399289  | 0.218985563 | 0.015759631  |
| -0.159531914 | 0.000900883 | -0.059808031 | 0.215825896 | 0.072436396  |
| -0.291712292 | 7.00E-10    | -0.155925689 | 0.00117949  | 0.030498509  |
| 0.665521932  | 2.44E-56    | 0.499746314  | 1.51E-28    | -0.010142724 |
| 0.0185138    | 0.701849065 | -0.03074024  | 0.524947257 | 0.079745932  |
| 0.462552844  | 3.49E-24    | 0.253258193  | 1.02E-07    | -0.031105916 |
| 0.330544162  | 2.02E-12    | 0.065852435  | 0.172866716 | -0.020849404 |
| 0.264637886  | 2.53E-08    | 0.088099998  | 0.067984005 | 0.005435343  |
| 0.49639519   | 3.93E-28    | 0.290574499  | 8.20E-10    | -0.149706536 |
| -0.152433523 | 0.001522953 | -0.074933689 | 0.120777853 | -0.007090932 |
| 0.091773392  | 0.057232822 | 0.001017299  | 0.983218723 | 0.035024575  |
| 0.010318037  | 0.83106003  | -0.058917525 | 0.222752037 | 0.015577291  |
| -0.076844447 | 0.111565586 | -0.044050096 | 0.362176467 | -0.037247303 |
| 0.275830043  | 6.02E-09    | 0.273200808  | 8.48E-09    | -0.04034339  |
| -0.479170827 | 4.56E-26    | -0.266664804 | 1.96E-08    | -0.050407531 |
| -0.125028081 | 0.009451344 | 0.123263726  | 0.010516294 | 0.005848074  |
| 0.394270984  | 1.92E-17    | 0.13455857   | 0.005192144 | -0.014564158 |
| 0.386553409  | 8.95E-17    | 0.113244148  | 0.018823604 | -0.014988673 |
| 0.131074301  | 0.006491665 | 0.026285112  | 0.586739466 | 0.105283442  |
| 0.345457988  | 1.70E-13    | 0.109775633  | 0.02280928  | -0.004680803 |
| 0.282290713  | 2.55E-09    | 0.041668204  | 0.388737318 | 0.013956883  |
| -0.480832935 | 2.92E-26    | -0.355479457 | 2.97E-14    | -0.002287479 |
| 0.151398171  | 0.001641173 | 0.114907236  | 0.017138088 | 0.032060783  |
| 0.228848605  | 1.62E-06    | 0.087930313  | 0.068518151 | -0.014492129 |
| 0.515689895  | 1.37E-30    | 0.438231839  | 1.32E-21    | 0.037554686  |
| -0.26546416  | 2.28E-08    | -0.163518893 | 0.000664389 | 0.056001742  |
| 0.090832983  | 0.059841171 | -0.061345346 | 0.204235246 | 0.067982392  |
| 0.028704923  | 0.552761198 | -0.061857274 | 0.200477556 | -0.005665335 |
| 0.601858241  | 1.01E-43    | 0.339148449  | 4.92E-13    | -0.093052346 |
| 0.511655653  | 4.62E-30    | 0.336665983  | 7.43E-13    | -0.140664496 |
| -0.150142498 | 0.001795818 | -0.066720242 | 0.167262866 | -0.026859658 |
| -0.123232552 | 0.01053603  | -0.078782189 | 0.102796793 | -0.08300954  |
| -0.093075761 | 0.053776776 | 0.011586168  | 0.810667829 | 0.045758134  |
| 0.298307829  | 2.75E-10    | 0.247295631  | 2.06E-07    | -0.018442867 |
| -0.175118007 | 0.000263274 | 0.058715651  | 0.224343972 | 0.050089743  |
| -0.334943721 | 9.87E-13    | -0.131725014 | 0.006228822 | 0.097880953  |
| 0.602546753  | 7.60E-44    | 0.33930706   | 4.79E-13    | -0.085628554 |
| -0.212972232 | 8.40E-06    | -0.087295784 | 0.070546101 | 0.08433435   |

|               |              |               |              |               |
|---------------|--------------|---------------|--------------|---------------|
| 0. 546038161  | 8. 74E-35    | 0. 303492051  | 1. 30E-10    | -0. 020853857 |
| -0. 302134636 | 1. 58E-10    | -0. 207818789 | 1. 40E-05    | 0. 138979719  |
| 0. 209395282  | 1. 20E-05    | 0. 036393324  | 0. 451617791 | -0. 115539279 |
| 0. 35489638   | 3. 29E-14    | 0. 294629597  | 4. 65E-10    | -0. 026809217 |
| 0. 043504933  | 0. 368153442 | 0. 077508448  | 0. 108496862 | -0. 089948624 |
| 0. 360697242  | 1. 17E-14    | 0. 105359748  | 0. 028924799 | -0. 019322738 |
| 0. 496751072  | 3. 55E-28    | 0. 223160899  | 2. 97E-06    | 0. 024023354  |
| 0. 313391055  | 2. 97E-11    | 0. 154591475  | 0. 001301278 | 0. 014280827  |
| -0. 27401975  | 7. 62E-09    | -0. 185923219 | 0. 000105307 | 0. 049001482  |
| -0. 164782354 | 0. 000602398 | -0. 065824827 | 0. 173047259 | 0. 073568127  |
| 0. 303962405  | 1. 21E-10    | 0. 32405724   | 5. 70E-12    | 0. 010548749  |
| -0. 038254598 | 0. 428801159 | 0. 177263561  | 0. 000220395 | 0. 080750314  |
| 0. 131268782  | 0. 006412085 | -0. 105267635 | 0. 029066063 | 0. 052238475  |
| -0. 002770517 | 0. 954319329 | -0. 069945723 | 0. 147623405 | 0. 084311972  |
| -0. 233504251 | 9. 79E-07    | -0. 255027814 | 8. 24E-08    | 0. 045929196  |
| -0. 256454814 | 6. 93E-08    | -0. 049141169 | 0. 309314686 | 0. 082643798  |
| -0. 453112193 | 3. 70E-23    | -0. 278056021 | 4. 49E-09    | 0. 065579541  |
| -0. 192674969 | 5. 78E-05    | -0. 032022079 | 0. 507804012 | 0. 012133812  |
| -0. 303878185 | 1. 23E-10    | -0. 225178877 | 2. 40E-06    | 0. 048487372  |
| 0. 10756293   | 0. 025717291 | 0. 090580145  | 0. 060558974 | 0. 027690018  |
| 0. 319634137  | 1. 14E-11    | 0. 115673581  | 0. 016406868 | 0. 026515927  |
| -0. 150636051 | 0. 001733507 | -0. 027445844 | 0. 5703206   | 0. 092469409  |
| -0. 328594269 | 2. 77E-12    | -0. 172142451 | 0. 000335743 | 0. 102182092  |
| -0. 423494828 | 3. 84E-20    | -0. 217233482 | 5. 47E-06    | 0. 055961854  |
| 0. 287366775  | 1. 28E-09    | 0. 437438494  | 1. 59E-21    | -0. 027054986 |
| -0. 439334483 | 1. 02E-21    | -0. 31429172  | 2. 59E-11    | 0. 108079366  |
| -0. 267616114 | 1. 74E-08    | -0. 159754485 | 0. 000885861 | 0. 122435614  |
| -0. 445286032 | 2. 48E-22    | -0. 243602206 | 3. 15E-07    | 0. 181800207  |
| 0. 184166143  | 0. 000122666 | 0. 101206145  | 0. 035910828 | -0. 018342528 |
| -0. 253548724 | 9. 84E-08    | -0. 072541351 | 0. 133135854 | 0. 092943129  |
| 0. 27039698   | 1. 22E-08    | 0. 133942212  | 0. 005403408 | 0. 008259607  |
| -0. 376947413 | 5. 76E-16    | -0. 138295609 | 0. 004062991 | 0. 022220846  |
| -0. 084330367 | 0. 080683487 | -0. 213022579 | 8. 36E-06    | 0. 029642743  |
| 0. 494850507  | 6. 08E-28    | 0. 298136308  | 2. 82E-10    | 0. 000932035  |
| 0. 283466558  | 2. 18E-09    | 0. 218597533  | 4. 76E-06    | -0. 015187092 |
| 0. 430359306  | 8. 16E-21    | 0. 462075404  | 3. 94E-24    | 0. 023543103  |
| 0. 204358575  | 1. 95E-05    | -0. 044214959 | 0. 360380963 | 0. 012497965  |
| -0. 129311948 | 0. 007254157 | 0. 00389246   | 0. 935854612 | 0. 000399763  |
| 0. 240723556  | 4. 38E-07    | 0. 090185777  | 0. 061692758 | -0. 099213812 |
| 0. 176161906  | 0. 000241521 | 0. 10470322   | 0. 029944629 | 0. 000610366  |
| 0. 329876263  | 2. 25E-12    | 0. 24452628   | 2. 84E-07    | 0. 023796805  |
| 0. 264511264  | 2. 57E-08    | 0. 183191044  | 0. 000133426 | -0. 105448367 |
| -0. 351233283 | 6. 26E-14    | -0. 091459359 | 0. 058093152 | 0. 091769068  |
| -0. 319082873 | 1. 24E-11    | -0. 206724515 | 1. 55E-05    | 0. 055624004  |
| -0. 197412615 | 3. 75E-05    | 0. 172132656  | 0. 000336009 | 0. 102095583  |
| 0. 599469264  | 2. 64E-43    | 0. 382173787  | 2. 11E-16    | 0. 03534496   |
| 0. 644828892  | 6. 59E-52    | 0. 379651151  | 3. 43E-16    | -0. 090521197 |
| 0. 585586004  | 6. 14E-41    | 0. 29241141   | 6. 35E-10    | -0. 042629607 |
| 0. 300134376  | 2. 12E-10    | 0. 048818035  | 0. 312510675 | 0. 014716935  |
| 0. 680960964  | 6. 98E-60    | 0. 530527949  | 1. 38E-32    | -0. 073879614 |
| 0. 678122729  | 3. 25E-59    | 0. 464695639  | 2. 02E-24    | -0. 039144863 |

|              |             |              |             |              |
|--------------|-------------|--------------|-------------|--------------|
| -0.402911937 | 3.25E-18    | -0.111809098 | 0.020392344 | 0.121150696  |
| 0.269452324  | 1.37E-08    | 0.116259727  | 0.015866166 | 0.000121528  |
| 0.508554337  | 1.16E-29    | 0.297727544  | 2.99E-10    | -0.017986424 |
| -0.27725995  | 4.98E-09    | -0.189862399 | 7.44E-05    | -0.11232052  |
| 0.500583376  | 1.19E-28    | 0.37554593   | 7.52E-16    | -0.057742636 |
| -0.261387634 | 3.79E-08    | -0.131960529 | 0.00613607  | 0.150031196  |
| 0.382932171  | 1.82E-16    | 0.138413414  | 0.004031318 | 0.042442583  |
| 0.486680113  | 5.93E-27    | 0.235056032  | 8.25E-07    | -0.086236297 |
| 0.571798488  | 1.07E-38    | 0.434630477  | 3.06E-21    | -0.048225184 |
| 0.480213329  | 3.45E-26    | 0.218542736  | 4.78E-06    | -0.052376015 |
| 0.314370233  | 2.56E-11    | 0.223091156  | 2.99E-06    | -0.027960567 |
| 0.280354533  | 3.31E-09    | 0.040517346  | 0.401983477 | -0.009544256 |
| 0.331582841  | 1.71E-12    | 0.175677797  | 0.000251392 | 0.028020479  |
| -0.211499959 | 9.73E-06    | -0.057097555 | 0.237397122 | 0.044341903  |
| 0.628936614  | 9.89E-49    | 0.383323418  | 1.69E-16    | -0.053510524 |
| 0.356634588  | 2.42E-14    | 0.332274477  | 1.53E-12    | -0.028916744 |
| 0.288783723  | 1.05E-09    | 0.130726251  | 0.006636296 | -0.101957423 |
| 0.245042861  | 2.67E-07    | 0.311909947  | 3.72E-11    | -0.057719137 |
| -0.377883696 | 4.82E-16    | -0.199297342 | 3.15E-05    | 0.071966508  |
| -0.159799905 | 0.000882824 | -0.028148193 | 0.560492827 | 0.035633245  |
| 0.179865856  | 0.000177156 | 0.071928259  | 0.136454771 | -0.094996375 |
| -0.40089274  | 4.95E-18    | -0.222080885 | 3.32E-06    | 0.126951921  |
| 0.108424442  | 0.024549128 | 0.062901265  | 0.192970728 | 0.073352052  |
| 0.214317512  | 7.34E-06    | 0.208608012  | 1.29E-05    | -0.013880609 |
| 0.351880013  | 5.59E-14    | 0.104227898  | 0.030702062 | -0.007196    |
| 0.271244865  | 1.09E-08    | 0.215332887  | 6.63E-06    | 0.03809087   |
| 0.192643852  | 5.80E-05    | 0.124215841  | 0.009929085 | 0.028794966  |
| 0.480974109  | 2.81E-26    | 0.30777663   | 6.91E-11    | -0.020947633 |
| -0.150046508 | 0.001808173 | 0.021838254  | 0.65156917  | 0.084668358  |
| 0.329419525  | 2.42E-12    | 0.067363296  | 0.1631989   | -0.023627285 |
| -0.391661887 | 3.24E-17    | -0.116047423 | 0.016060179 | 0.186538607  |
| 0.042181757  | 0.382912877 | -0.059483812 | 0.21832948  | 0.003954895  |
| -0.207377072 | 1.46E-05    | 0.008487282  | 0.86069708  | -0.026186568 |
| -0.196227538 | 4.18E-05    | -0.137973889 | 0.004150637 | -0.060150489 |
| 0.055596593  | 0.24997522  | -0.079346152 | 0.100350055 | 0.079878734  |
| -0.068342449 | 0.157153994 | 0.009841357  | 0.838755493 | -0.09144782  |
| -0.535946763 | 2.42E-33    | -0.370099002 | 2.09E-15    | 0.146623606  |
| -0.084470635 | 0.080178756 | 0.038272696  | 0.428582624 | -0.000284549 |
| 0.739065108  | 1.91E-75    | 0.452778863  | 4.02E-23    | -0.082968893 |
| 0.264963735  | 2.43E-08    | 0.202640777  | 2.30E-05    | -0.007121297 |
| 0.496793224  | 3.51E-28    | 0.400942384  | 4.90E-18    | -0.115203901 |
| 0.22049094   | 3.92E-06    | 0.073072181  | 0.130312851 | 0.069617885  |
| 0.204622298  | 1.90E-05    | 0.022926489  | 0.635434128 | -0.029519208 |
| -0.067199413 | 0.164227492 | -0.005146563 | 0.915255901 | -0.054816295 |
| 0.17357965   | 0.000298687 | 0.162091152  | 0.000741527 | 0.081337832  |
| 0.175180911  | 0.000261913 | -0.003679271 | 0.93936089  | 0.022788491  |
| -0.025188284 | 0.60245202  | -0.099159182 | 0.039850913 | -0.115764388 |
| 0.20411397   | 2.00E-05    | 0.133842511  | 0.0054383   | -0.061060994 |
| -0.412900133 | 3.92E-19    | -0.343049381 | 2.55E-13    | 0.143624667  |
| -0.510959445 | 5.68E-30    | -0.291638179 | 7.07E-10    | 0.006963922  |
| -0.067402639 | 0.162952693 | -0.029746786 | 0.538433814 | 0.120602702  |

|               |              |               |              |               |
|---------------|--------------|---------------|--------------|---------------|
| 0. 673345087  | 4. 16E-58    | 0. 366840705  | 3. 82E-15    | -0. 059475707 |
| 0. 22909881   | 1. 58E-06    | 0. 147330599  | 0. 002191664 | 0. 010958775  |
| 0. 068419669  | 0. 156684563 | -0. 01906617  | 0. 693396842 | 0. 031651723  |
| 0. 528984875  | 2. 25E-32    | 0. 297901754  | 2. 92E-10    | -0. 047921571 |
| -0. 304098018 | 1. 19E-10    | -0. 117990358 | 0. 014359776 | -0. 011955209 |
| 0. 303790366  | 1. 24E-10    | 0. 110559391  | 0. 021849829 | -0. 183298357 |
| 0. 264618227  | 2. 53E-08    | 0. 04895147   | 0. 311188311 | 0. 016571733  |
| 0. 25825753   | 5. 57E-08    | 0. 209261241  | 1. 21E-05    | -0. 016612828 |
| 0. 18411235   | 0. 000123238 | 0. 126131543  | 0. 008835077 | -0. 064819243 |
| -0. 166828964 | 0. 000513252 | -0. 088224204 | 0. 06759519  | 0. 07758765   |
| -0. 038373305 | 0. 427368998 | -0. 171583285 | 0. 000351285 | -0. 070228866 |
| 0. 52498791   | 7. 89E-32    | 0. 332931559  | 1. 37E-12    | 0. 011279895  |
| 0. 246775874  | 2. 19E-07    | 0. 044204059  | 0. 360499504 | 0. 013983759  |
| 0. 273778464  | 7. 87E-09    | 0. 21680888   | 5. 71E-06    | -0. 115369405 |
| 0. 5556487    | 3. 32E-36    | 0. 237895531  | 6. 02E-07    | -0. 056525146 |
| 0. 358465922  | 1. 75E-14    | 0. 099660678  | 0. 038853275 | -0. 024902593 |
| 0. 56355101   | 2. 08E-37    | 0. 340448698  | 3. 96E-13    | -0. 026212566 |
| 0. 109367893  | 0. 023322694 | 0. 087622456  | 0. 069496014 | 0. 169220019  |
| 0. 103065835  | 0. 03262317  | 0. 090790616  | 0. 059960959 | 0. 047648112  |
| 0. 229509979  | 1. 51E-06    | 0. 134414148  | 0. 005240968 | 0. 022381092  |
| 0. 186181183  | 0. 000102962 | 0. 029106956  | 0. 547210545 | -0. 029686641 |
| 0. 452345497  | 4. 47E-23    | 0. 228111157  | 1. 76E-06    | -0. 027117677 |
| -0. 079646325 | 0. 099066755 | 0. 068122993  | 0. 158493906 | 0. 071199924  |
| 0. 093646091  | 0. 052318931 | -0. 019884479 | 0. 680945136 | 0. 112925877  |
| -0. 338209417 | 5. 75E-13    | -0. 112023236 | 0. 020151273 | 0. 050850302  |
| 0. 095931609  | 0. 046803187 | -0. 013436006 | 0. 781153245 | 0. 068243134  |
| -0. 273476615 | 8. 18E-09    | -0. 164330574 | 0. 000623921 | 0. 026256902  |
| -0. 157710489 | 0. 001032957 | 0. 048845961  | 0. 312233617 | 0. 058858171  |
| 0. 488471731  | 3. 62E-27    | 0. 260315333  | 4. 33E-08    | -0. 051672019 |
| -0. 145453131 | 0. 002498729 | -0. 094406901 | 0. 050425593 | -0. 006094741 |
| -0. 380015084 | 3. 20E-16    | -0. 183421522 | 0. 000130806 | 0. 110861888  |
| -0. 029318658 | 0. 544298777 | -0. 151607422 | 0. 001616622 | 0. 037898328  |
| 0. 181932725  | 0. 000148622 | 0. 004480209  | 0. 926194633 | -0. 013387864 |
| 0. 463122821  | 3. 02E-24    | 0. 466137797  | 1. 40E-24    | -0. 046455347 |
| 0. 142028748  | 0. 003161586 | 0. 073640431  | 0. 127342384 | -0. 000622355 |
| 0. 607693751  | 9. 20E-45    | 0. 343224599  | 2. 48E-13    | -0. 058315619 |
| 0. 577235332  | 1. 44E-39    | 0. 35844693   | 1. 75E-14    | -0. 048325125 |
| 0. 361111019  | 1. 09E-14    | 0. 10043744   | 0. 037349818 | 0. 00243219   |
| 0. 034230972  | 0. 47896399  | -0. 133237456 | 0. 005654425 | -0. 063854447 |
| 0. 611304002  | 2. 04E-45    | 0. 367708302  | 3. 26E-15    | -0. 038059844 |
| 0. 194066616  | 5. 10E-05    | 0. 112297301  | 0. 019846357 | -0. 010840852 |
| 0. 578329084  | 9. 56E-40    | 0. 362741368  | 8. 09E-15    | -0. 009172763 |
| 0. 316237444  | 1. 93E-11    | 0. 127529295  | 0. 008105948 | -0. 012796913 |
| 0. 168158101  | 0. 000462095 | 0. 073847783  | 0. 126271637 | 0. 060347347  |
| 0. 100713318  | 0. 036827855 | 0. 007898922  | 0. 870265466 | 0. 01615768   |
| -0. 37435596  | 9. 42E-16    | -0. 204566044 | 1. 91E-05    | 0. 061865043  |
| 0. 372401888  | 1. 36E-15    | 0. 07261438   | 0. 132744703 | 0. 015097657  |
| -0. 158502059 | 0. 000973506 | -0. 125451517 | 0. 009210483 | 0. 029442858  |
| 0. 552025371  | 1. 15E-35    | 0. 253034937  | 1. 05E-07    | -0. 037155505 |
| -0. 352920738 | 4. 66E-14    | -0. 155328757 | 0. 001232619 | 0. 107403027  |
| 0. 171974784  | 0. 000340334 | 0. 019357237  | 0. 68895819  | 0. 034255576  |

|              |             |              |             |              |
|--------------|-------------|--------------|-------------|--------------|
| 0.27052431   | 1.20E-08    | 0.032189362  | 0.50558857  | -0.007543011 |
| 0.340063878  | 4.22E-13    | 0.123824816  | 0.010166629 | -0.113782753 |
| -0.09746378  | 0.043385434 | -0.178749267 | 0.000194632 | -0.023438809 |
| 0.67930424   | 1.72E-59    | 0.367736476  | 3.24E-15    | -0.06698388  |
| 0.198796499  | 3.30E-05    | 0.200828008  | 2.73E-05    | 0.025663021  |
| 0.124923962  | 0.009511421 | -0.061523591 | 0.202921129 | -0.052052989 |
| -0.053811333 | 0.265530535 | 0.09471851   | 0.049666819 | -0.015834567 |
| 0.354389819  | 3.60E-14    | 0.18254126   | 0.000141081 | -0.056607385 |
| 0.213889596  | 7.67E-06    | 0.197865573  | 3.60E-05    | -0.082215029 |
| 0.451962291  | 4.91E-23    | 0.216040535  | 6.17E-06    | -0.007315708 |
| 0.436345082  | 2.05E-21    | 0.154534744  | 0.001306704 | -0.019989678 |
| 0.339497474  | 4.64E-13    | 0.200735767  | 2.75E-05    | -0.032503677 |
| -0.61856394  | 9.35E-47    | -0.491064492 | 1.76E-27    | 0.023346388  |
| 0.155284716  | 0.001236625 | 0.158748326  | 0.000955665 | 0.069356508  |
| -0.459429723 | 7.68E-24    | -0.342271405 | 2.91E-13    | 0.184141833  |
| -0.173699846 | 0.000295768 | 0.035174424  | 0.466923171 | 0.011194888  |
| -0.019650315 | 0.684499617 | 0.142602256  | 0.003040479 | 0.012241976  |
| 0.689546024  | 5.98E-62    | 0.348051282  | 1.09E-13    | -0.051636598 |
| -0.133049459 | 0.005723133 | 0.079639256  | 0.099096824 | 0.024924151  |
| -0.410733514 | 6.24E-19    | -0.251831529 | 1.21E-07    | -0.015729902 |
| 0.479643054  | 4.02E-26    | 0.251346765  | 1.28E-07    | -0.038593459 |
| -0.369296778 | 2.43E-15    | -0.162390631 | 0.000724691 | 0.088130185  |
| 0.015764505  | 0.744448239 | 0.041172175  | 0.394413733 | -0.047960265 |
| 0.323396402  | 6.33E-12    | 0.263138156  | 3.05E-08    | 0.006490373  |
| 0.557986845  | 1.48E-36    | 0.293281004  | 5.62E-10    | 0.042767571  |
| 0.37528148   | 7.91E-16    | 0.237193071  | 6.51E-07    | -0.015227342 |
| -0.022829829 | 0.636860479 | -0.181363637 | 0.000156016 | 0.053716417  |
| 0.357694112  | 2.01E-14    | 0.129424401  | 0.007203212 | -0.044236274 |
| -0.320133348 | 1.05E-11    | -0.133114864 | 0.005699145 | 0.063964219  |
| -0.537143239 | 1.64E-33    | -0.262610475 | 3.26E-08    | 0.099067831  |
| 0.623421324  | 1.14E-47    | 0.367185034  | 3.59E-15    | -0.088269471 |
| -0.380850775 | 2.72E-16    | -0.217894003 | 5.11E-06    | 0.014477476  |
| -0.151533204 | 0.001625291 | -0.212984666 | 8.39E-06    | -0.02625657  |
| -0.119132701 | 0.013435703 | 0.04062416   | 0.400742829 | 0.126110828  |
| 0.469617691  | 5.68E-25    | 0.358603893  | 1.70E-14    | -0.064587637 |
| -0.214704254 | 7.06E-06    | -0.175843668 | 0.000247968 | 0.049089011  |
| -0.220898267 | 3.75E-06    | -0.061838861 | 0.200611836 | 0.058372287  |
| 0.592531032  | 4.15E-42    | 0.284713799  | 1.84E-09    | -0.119213187 |
| 0.668278629  | 5.90E-57    | 0.430573374  | 7.77E-21    | -0.039691265 |
| -0.127005777 | 0.008372502 | -0.052880654 | 0.273897831 | 0.040142482  |
| 0.044496388  | 0.357328844 | 0.049060868  | 0.310106898 | 0.047760217  |
| -0.08587444  | 0.075266981 | -0.10135098  | 0.035645044 | -0.090439208 |
| -0.388118588 | 6.57E-17    | -0.129567864 | 0.007138682 | 0.152373072  |
| 0.226608873  | 2.06E-06    | 0.257715481  | 5.95E-08    | -0.031070668 |
| 0.607404391  | 1.04E-44    | 0.301808111  | 1.66E-10    | -0.057624264 |
| 0.051582872  | 0.285862476 | 0.0186704    | 0.699449012 | -0.033973739 |
| -0.525924125 | 5.89E-32    | -0.318466818 | 1.37E-11    | 0.10885216   |
| -0.25313335  | 1.03E-07    | -0.076751534 | 0.11200038  | 0.044054469  |
| 0.124236231  | 0.009916834 | 0.065383923  | 0.175949682 | -0.025073386 |
| 0.057030557  | 0.237948892 | 0.027231848  | 0.573331164 | 0.00866901   |
| 0.417663238  | 1.39E-19    | 0.275917178  | 5.95E-09    | -0.030291656 |

|              |             |              |             |              |
|--------------|-------------|--------------|-------------|--------------|
| -0.520095996 | 3.59E-31    | -0.356328102 | 2.56E-14    | 0.011562957  |
| 0.379833453  | 3.31E-16    | 0.330881139  | 1.91E-12    | -0.068297191 |
| -0.092277956 | 0.055872642 | 0.07384954   | 0.126262598 | 0.125776203  |
| 0.138663196  | 0.0039649   | 0.196303049  | 4.15E-05    | 0.050371878  |
| -0.301151919 | 1.83E-10    | -0.199052577 | 3.22E-05    | 0.080349985  |
| 0.108885548  | 0.023942929 | 0.063601515  | 0.188052209 | 0.055662651  |
| 0.08634832   | 0.073665261 | 0.05309709   | 0.27193611  | -0.026479468 |
| -0.248663156 | 1.75E-07    | -0.108291789 | 0.024725959 | -0.020964322 |
| 0.334961394  | 9.84E-13    | 0.212299446  | 8.99E-06    | -0.00070028  |
| 0.363908761  | 6.54E-15    | 0.459695039  | 7.19E-24    | -0.017063343 |
| -0.213762971 | 7.76E-06    | -0.09464357  | 0.049848423 | 0.066392537  |
| -0.152659539 | 0.001498209 | 0.039216515  | 0.41727616  | 0.003944017  |
| 0.015467598  | 0.749098397 | -0.090494807 | 0.060802843 | -0.067618888 |
| 0.397539062  | 9.86E-18    | 0.321205676  | 8.92E-12    | 0.023008455  |
| 0.348249447  | 1.05E-13    | 0.227422753  | 1.89E-06    | 0.014035778  |
| 0.520178004  | 3.50E-31    | 0.542991654  | 2.41E-34    | 0.041205155  |
| -0.279943776 | 3.49E-09    | -0.134302262 | 0.005279077 | 0.110312505  |
| 0.258681248  | 5.29E-08    | 0.084376669  | 0.080516594 | -0.048612569 |
| -0.315175592 | 2.27E-11    | -0.232833772 | 1.05E-06    | -0.014248358 |
| -0.183015829 | 0.000135451 | -0.119212258 | 0.013373342 | 0.015464784  |
| 0.430120442  | 8.62E-21    | 0.191825741  | 6.24E-05    | -0.054749974 |
| 0.109329586  | 0.023371439 | -0.139418273 | 0.0037701   | 0.082931648  |
| 0.157924338  | 0.001016575 | -0.04508568  | 0.350990653 | -0.023321315 |
| 0.413242713  | 3.64E-19    | 0.200377267  | 2.84E-05    | -0.021888739 |
| 0.418884943  | 1.07E-19    | 0.230944812  | 1.29E-06    | -0.067715408 |
| 0.505907487  | 2.53E-29    | 0.240317689  | 4.58E-07    | -0.050415378 |
| -0.343919051 | 2.20E-13    | -0.245499743 | 2.54E-07    | 0.073750264  |
| 0.508696613  | 1.11E-29    | 0.302391916  | 1.53E-10    | -0.018407233 |
| -0.121950884 | 0.011376405 | 0.00794448   | 0.869523869 | -0.016097693 |
| -0.298875892 | 2.54E-10    | -0.122873994 | 0.010765403 | -0.050797458 |
| 0.176855733  | 0.000228006 | -0.05480385  | 0.256802446 | -0.067016146 |
| 0.39585034   | 1.39E-17    | 0.187664521  | 9.04E-05    | 0.003862382  |
| 0.130823204  | 0.00659572  | -0.038039227 | 0.431406625 | 0.007325973  |
| 0.397411489  | 1.01E-17    | 0.209461844  | 1.19E-05    | -0.044652402 |
| -0.370208006 | 2.05E-15    | -0.138465439 | 0.004017402 | 0.093940435  |
| 0.332383492  | 1.50E-12    | 0.104772578  | 0.029835454 | 0.037911972  |
| -0.317519906 | 1.58E-11    | -0.119146627 | 0.013424768 | 0.114296907  |
| 0.357818601  | 1.96E-14    | 0.253953323  | 9.37E-08    | -0.09774349  |
| 0.405360148  | 1.95E-18    | 0.514428731  | 2.01E-30    | -0.018203732 |
| 0.216265111  | 6.03E-06    | 0.096588002  | 0.045312309 | 0.004429833  |
| 0.213783521  | 7.75E-06    | 0.161697108  | 0.000764231 | -0.028211285 |
| 0.235574129  | 7.79E-07    | 0.183790112  | 0.000126715 | -0.05899432  |
| -0.042470185 | 0.379665181 | 0.066603048  | 0.168011602 | -0.029955888 |
| -0.209217542 | 1.22E-05    | -0.057118451 | 0.237225215 | 0.070349887  |
| 0.548159921  | 4.29E-35    | 0.237218073  | 6.49E-07    | -0.044192568 |
| 0.204681633  | 1.89E-05    | -0.09400304  | 0.051423382 | -0.013575043 |
| -0.348641782 | 9.82E-14    | -0.094532479 | 0.050118652 | -0.013544294 |
| -0.025517551 | 0.597715302 | -0.11483898  | 0.017204576 | 0.034456655  |
| 0.104858113  | 0.029701287 | 0.050563683  | 0.295501912 | 0.006914998  |
| 0.328053947  | 3.02E-12    | 0.082510967  | 0.087466078 | 0.086226374  |
| 0.186928779  | 9.64E-05    | 0.046881596  | 0.332115783 | -0.084511231 |



|              |             |              |             |              |
|--------------|-------------|--------------|-------------|--------------|
| -0.282427209 | 2.50E-09    | -0.142613042 | 0.003038242 | 0.020176911  |
| 0.730978306  | 4.90E-73    | 0.442528835  | 4.79E-22    | -0.078388453 |
| 0.402916274  | 3.25E-18    | 0.12097105   | 0.012058325 | -0.09200758  |
| -0.545173449 | 1.17E-34    | -0.343571103 | 2.34E-13    | 0.184736567  |
| 0.114651847  | 0.017388022 | 0.020546901  | 0.670928368 | 0.099053398  |
| 0.280501875  | 3.24E-09    | 0.183082367  | 0.000134678 | 0.029252793  |
| 0.393175771  | 2.39E-17    | 0.144849835  | 0.002605428 | -0.115209965 |
| -0.290494014 | 8.30E-10    | -0.229423133 | 1.53E-06    | 0.015339034  |
| 0.160027534  | 0.000867747 | 0.012725138  | 0.792460692 | -0.094985826 |
| 0.062055551  | 0.199035743 | -0.123397325 | 0.010432083 | 0.127042083  |
| -0.399973736 | 5.98E-18    | -0.183753468 | 0.000127116 | 0.172358068  |
| 0.511233443  | 5.24E-30    | 0.212964965  | 8.41E-06    | -0.062992861 |
| 0.496656818  | 3.65E-28    | 0.480960625  | 2.82E-26    | -0.008884141 |
| 0.12446517   | 0.009780204 | 0.062816061  | 0.193575563 | -0.051002836 |
| -0.252851616 | 1.07E-07    | -0.109039263 | 0.023743742 | 0.102841378  |
| -0.297194937 | 3.23E-10    | -0.078235731 | 0.105212461 | 0.086964029  |
| -0.270959229 | 1.13E-08    | -0.068656659 | 0.155250476 | -0.027307431 |
| 0.019190993  | 0.691492038 | -0.143347557 | 0.002889396 | -0.035933693 |
| 0.213830961  | 7.71E-06    | 0.060547717  | 0.210191395 | -0.023537232 |
| 0.29505116   | 4.38E-10    | 0.354468017  | 3.55E-14    | 0.025996474  |
| 0.518078295  | 6.65E-31    | 0.457691559  | 1.19E-23    | -0.004229621 |
| -0.406268654 | 1.61E-18    | -0.236650451 | 6.92E-07    | 0.119759555  |
| 0.149462627  | 0.001885013 | -0.041771444 | 0.387562122 | -0.033041587 |
| -0.116239192 | 0.015884841 | 0.061062919  | 0.206330066 | 0.032577674  |
| -0.223855868 | 2.76E-06    | -0.036656154 | 0.448354965 | 0.079390622  |
| 0.374085638  | 9.91E-16    | 0.323996014  | 5.76E-12    | 0.00706874   |
| 0.546701242  | 7.00E-35    | 0.389078482  | 5.43E-17    | -0.038271802 |
| 0.54297313   | 2.43E-34    | 0.344235673  | 2.09E-13    | -0.06171058  |
| 0.420196502  | 7.99E-20    | 0.130780489  | 0.006613569 | 0.035241788  |
| 0.688687946  | 9.69E-62    | 0.471576288  | 3.41E-25    | -0.078372114 |
| 0.347773016  | 1.14E-13    | 0.179497774  | 0.000182748 | -0.05197928  |
| 0.638276006  | 1.42E-50    | 0.351268536  | 6.22E-14    | -0.006925038 |
| 0.056501322  | 0.242339168 | -0.004814874 | 0.920698978 | 0.010199885  |
| 0.200099931  | 2.92E-05    | -0.022663852 | 0.639312806 | 0.012926422  |
| 0.454826464  | 2.42E-23    | 0.275003063  | 6.70E-09    | -0.089873076 |
| 0.12652094   | 0.0086263   | -0.082771264 | 0.086468502 | -0.102619704 |
| -0.398957752 | 7.37E-18    | -0.26095866  | 4.00E-08    | 0.092719296  |
| 0.224583385  | 2.55E-06    | -0.015137501 | 0.754279052 | -0.020297503 |
| 0.561149924  | 4.87E-37    | 0.343098555  | 2.53E-13    | -0.081522599 |
| 0.197477343  | 3.73E-05    | 0.034962792  | 0.469609484 | 0.042331093  |
| 0.185886762  | 0.000105642 | 0.07426443   | 0.124141254 | 0.01911017   |
| 0.303250566  | 1.35E-10    | 0.117452482  | 0.0148139   | 0.087153619  |
| -0.351717838 | 5.75E-14    | -0.249539978 | 1.58E-07    | -0.050621506 |
| 0.309910764  | 5.03E-11    | 0.132204206  | 0.006041409 | -0.02152315  |
| 0.602588741  | 7.47E-44    | 0.324245     | 5.53E-12    | -0.081073399 |
| 0.45524632   | 2.18E-23    | 0.427629853  | 1.52E-20    | 0.001250496  |
| -0.185277041 | 0.000111403 | 0.052290909  | 0.279291923 | 0.067427636  |
| -0.143720069 | 0.002816472 | 0.100866822  | 0.036540114 | -0.053925179 |
| 0.116009866  | 0.016094716 | 0.075303748  | 0.11894885  | 0.018661327  |
| -0.148020839 | 0.002087729 | 0.045291507  | 0.348793692 | 0.003563106  |
| 0.287044103  | 1.34E-09    | 0.114807578  | 0.017235241 | 0.137503966  |

|              |             |              |             |              |
|--------------|-------------|--------------|-------------|--------------|
| 0.810011895  | 2.94E-101   | 0.508302354  | 1.25E-29    | -0.119804847 |
| -0.216368633 | 5.97E-06    | -0.007526316 | 0.876334985 | 0.060483835  |
| 0.559097982  | 1.00E-36    | 0.369209204  | 2.47E-15    | -0.026677331 |
| 0.191872102  | 6.22E-05    | 0.125353399  | 0.009265803 | -0.036215347 |
| -0.48084675  | 2.90E-26    | -0.360276629 | 1.26E-14    | 0.117140793  |
| 0.156267512  | 0.001150024 | 0.030322051  | 0.530603281 | -0.064233836 |
| 0.05374213   | 0.26614661  | -0.07473283  | 0.121779733 | 0.015026242  |
| 0.358446937  | 1.75E-14    | 0.215533385  | 6.50E-06    | -0.064120341 |
| 0.15126995   | 0.001656385 | 0.116744656  | 0.015430702 | 0.043119711  |
| 0.124044035  | 0.010032842 | 0.039740159  | 0.411079474 | 0.059250625  |
| 0.422678897  | 4.61E-20    | 0.216260693  | 6.04E-06    | -0.058209812 |
| 0.360969958  | 1.11E-14    | 0.276942407  | 5.20E-09    | -0.021514439 |
| 0.089772685  | 0.062899092 | -0.081755411 | 0.090414197 | 0.000159659  |
| 0.538209427  | 1.16E-33    | 0.280692412  | 3.16E-09    | -0.02271796  |
| 0.156850646  | 0.001101317 | 0.08285413   | 0.086152852 | 0.046864821  |
| 0.537971489  | 1.26E-33    | 0.249967001  | 1.51E-07    | -0.162233744 |
| 0.434035266  | 3.51E-21    | 0.341238422  | 3.46E-13    | -0.037973473 |
| 0.285756502  | 1.59E-09    | 0.311023394  | 4.25E-11    | 0.004515601  |
| 0.033283967  | 0.491218094 | -0.033744025 | 0.485244157 | 0.018661382  |
| 0.495133086  | 5.62E-28    | 0.294665861  | 4.62E-10    | -0.07824003  |
| -0.056012121 | 0.246447553 | 0.23345685   | 9.84E-07    | 0.050277926  |
| -0.279413914 | 3.75E-09    | -0.246663515 | 2.22E-07    | 0.077232657  |
| -0.369372408 | 2.40E-15    | -0.125248224 | 0.009325431 | 0.105706428  |
| -0.413924436 | 3.14E-19    | -0.104838594 | 0.029731858 | 0.06455385   |
| 0.200620524  | 2.78E-05    | 0.211105261  | 1.01E-05    | -0.003886284 |
| 0.040193493  | 0.405759056 | -0.031450333 | 0.515414159 | 0.049494452  |
| 0.400250462  | 5.65E-18    | 0.179560791  | 0.000181779 | -0.035165032 |
| -0.356085377 | 2.67E-14    | -0.171933658 | 0.00034147  | 0.115448179  |
| -0.30464751  | 1.10E-10    | -0.112056528 | 0.020114018 | 0.130610536  |
| 0.536446026  | 2.06E-33    | 0.426978432  | 1.76E-20    | -0.070024567 |
| -0.167713158 | 0.000478668 | -0.071363624 | 0.139567323 | 0.063283089  |
| 0.464854987  | 1.94E-24    | 0.341404077  | 3.37E-13    | 0.029349585  |
| -0.165339991 | 0.000576782 | -0.202636826 | 2.30E-05    | -0.044176986 |
| 0.527309091  | 3.81E-32    | 0.317383842  | 1.61E-11    | 0.046696719  |
| -0.261176109 | 3.89E-08    | -0.160805071 | 0.000818025 | 0.010958815  |
| 0.283438683  | 2.18E-09    | 0.138724596  | 0.003948726 | 0.077764618  |
| -0.241722512 | 3.91E-07    | -0.176243377 | 0.000239896 | -0.00836856  |
| 0.420373299  | 7.68E-20    | 0.176293675  | 0.000238898 | -0.043576208 |
| 0.307244389  | 7.48E-11    | 0.101295804  | 0.035746098 | -0.033947684 |
| -0.242556204 | 3.56E-07    | -0.090409059 | 0.061048705 | 0.087943032  |
| 0.036225928  | 0.453702836 | -0.109409546 | 0.023269791 | 0.087005243  |
| -0.258121266 | 5.66E-08    | -0.029620159 | 0.540165199 | 0.077068816  |
| 0.393541163  | 2.22E-17    | 0.260698684  | 4.13E-08    | -0.037161819 |
| -0.170162296 | 0.000393851 | -0.310697257 | 4.47E-11    | 0.010040142  |
| -0.165684954 | 0.000561446 | -0.057446835 | 0.234535193 | -0.015277661 |
| -0.518505605 | 5.84E-31    | -0.342733152 | 2.69E-13    | -0.003750694 |
| -0.003333746 | 0.945046144 | 0.028632072  | 0.553769953 | 0.105734013  |
| -0.35847841  | 1.74E-14    | -0.276002048 | 5.88E-09    | 0.047058652  |
| 0.105197605  | 0.029173856 | -0.080539962 | 0.095323416 | 0.021731834  |
| -0.094352143 | 0.050559925 | 0.060043781  | 0.214018441 | 0.129998288  |
| 0.080973263  | 0.09354946  | 0.022635298  | 0.639735089 | 0.024162271  |

|              |             |              |             |              |
|--------------|-------------|--------------|-------------|--------------|
| 0.340524763  | 3.91E-13    | 0.239242652  | 5.18E-07    | -0.028114242 |
| -0.434739129 | 2.98E-21    | -0.247373716 | 2.04E-07    | 0.097652321  |
| -0.487299616 | 5.00E-27    | -0.132819979 | 0.005808018 | 0.03167858   |
| -0.427648181 | 1.51E-20    | -0.202809037 | 2.26E-05    | 0.063157202  |
| 0.41403172   | 3.07E-19    | 0.307026263  | 7.72E-11    | -0.000608279 |
| 0.030130896  | 0.533198892 | 0.017024831  | 0.724814047 | -0.026386846 |
| 0.357103476  | 2.23E-14    | 0.15131708   | 0.001650778 | 0.010910576  |
| 0.469739922  | 5.50E-25    | 0.224985334  | 2.45E-06    | -0.030341461 |
| -0.344894577 | 1.87E-13    | -0.158316187 | 0.000987176 | 0.074068408  |
| 0.263781555  | 2.81E-08    | 0.124347258  | 0.009850364 | -0.02515687  |
| -0.142665643 | 0.003027355 | -0.018858607 | 0.69656852  | -0.008724464 |
| 0.031607824  | 0.513312027 | -0.079916833 | 0.097921489 | 0.009280842  |
| 0.270927956  | 1.14E-08    | 0.228707118  | 1.65E-06    | 0.042257644  |
| -0.171634273 | 0.00034984  | 0.068835847  | 0.154172768 | 0.020603823  |
| -0.551075759 | 1.60E-35    | -0.36065626  | 1.18E-14    | 0.122104667  |
| 0.015242159  | 0.752635299 | 0.170275949  | 0.000390278 | 0.006470015  |
| -0.283318559 | 2.22E-09    | -0.219278393 | 4.44E-06    | -0.04638809  |
| -0.619833191 | 5.41E-47    | -0.262066981 | 3.48E-08    | 0.118999807  |
| -0.131905939 | 0.006157458 | -0.028737331 | 0.55231274  | 0.001553701  |
| 0.198679505  | 3.33E-05    | 0.014008324  | 0.772082904 | 0.018706811  |
| 0.276131209  | 5.78E-09    | 0.175507586  | 0.000254951 | -0.064054504 |
| -0.042096084 | 0.383880812 | 0.068339162  | 0.157174004 | -0.070574458 |
| -0.076823255 | 0.111664637 | -0.02447206  | 0.612813083 | 0.034033566  |
| -0.015511807 | 0.748405419 | -0.071406935 | 0.139326657 | -0.079815954 |
| -0.252819633 | 1.07E-07    | -0.019446733 | 0.687595533 | -0.011577839 |
| -0.091166397 | 0.058905383 | 0.110175779  | 0.022314973 | -0.044216586 |
| 0.48217635   | 2.03E-26    | 0.241170915  | 4.16E-07    | -0.0158094   |
| -0.14749531  | 0.002166442 | -0.111420831 | 0.02083584  | 0.044424765  |
| -0.275036174 | 6.68E-09    | -0.166529407 | 0.000525486 | 0.064902833  |
| 0.085854292  | 0.075335706 | 0.047886332  | 0.32184672  | -0.050524991 |
| 0.250685196  | 1.38E-07    | 0.217791721  | 5.17E-06    | -0.050421047 |
| 0.582910602  | 1.70E-40    | 0.514897739  | 1.75E-30    | -0.016142548 |
| -0.148649284 | 0.001997037 | -0.095267499 | 0.048353236 | 0.14111425   |
| -0.172713659 | 0.000320529 | -0.150386762 | 0.001764728 | 0.029312268  |
| 0.40837702   | 1.03E-18    | 0.211272935  | 9.95E-06    | 0.010973712  |
| 0.024471972  | 0.61281436  | -0.136585898 | 0.004548693 | -0.027306611 |
| -0.164792847 | 0.000601906 | 0.036364217  | 0.451979946 | -0.022261155 |
| 0.096726927  | 0.045001935 | -0.003444185 | 0.943228669 | 0.104852758  |
| 0.225579102  | 2.30E-06    | 0.200732389  | 2.75E-05    | 0.005907596  |
| -0.008631231 | 0.858359108 | 0.040690903  | 0.39996877  | 0.043455287  |
| 0.28437738   | 1.92E-09    | 0.157522312  | 0.001047574 | 0.006622724  |
| -0.205339947 | 1.78E-05    | -0.015905445 | 0.742244079 | 0.045512642  |
| 0.329898302  | 2.24E-12    | 0.120045147  | 0.012735634 | -0.024559664 |
| 0.165748945  | 0.000558643 | 0.117264911  | 0.014975205 | 0.074248364  |
| 0.188348247  | 8.51E-05    | 0.021267517  | 0.660097447 | -0.036539699 |
| 0.074016297  | 0.125406606 | 0.043416808  | 0.369125327 | -0.003000305 |
| 0.18693129   | 9.64E-05    | 0.079296247  | 0.100564685 | -0.042116073 |
| 0.083066092  | 0.085349669 | 0.113534444  | 0.01851938  | 0.063031038  |
| 0.02946769   | 0.542253595 | -0.03848488  | 0.426025415 | 0.023384639  |
| 0.096225435  | 0.046130806 | 0.093636023  | 0.052344377 | 0.000473816  |
| 0.345167319  | 1.78E-13    | 0.098383499  | 0.041436613 | -0.024179812 |

|              |             |              |             |              |
|--------------|-------------|--------------|-------------|--------------|
| 0.191640138  | 6.35E-05    | 0.142176063  | 0.003130067 | -0.084879132 |
| 0.130295911  | 0.00681911  | -0.105991581 | 0.027971611 | -0.000964521 |
| 0.105161534  | 0.029229511 | 0.110073189  | 0.02244081  | -0.009406744 |
| -0.420425218 | 7.60E-20    | -0.191018555 | 6.71E-05    | 0.062428722  |
| 0.068264908  | 0.157626447 | 0.015863389  | 0.742901569 | 0.086840476  |
| 0.251643613  | 1.23E-07    | 0.168453518  | 0.000451389 | 0.005007979  |
| 0.161462579  | 0.000778048 | 0.045745836  | 0.343975165 | 0.039609423  |
| 0.442162141  | 5.22E-22    | 0.122163822  | 0.011232803 | -0.040388059 |
| 0.38708466   | 8.06E-17    | 0.181539773  | 0.000153691 | -0.138348655 |
| 0.439305135  | 1.03E-21    | 0.137298303  | 0.004340273 | -0.004122527 |
| 0.37732522   | 5.36E-16    | 0.213034935  | 8.35E-06    | 0.095922383  |
| -0.138016074 | 0.004139048 | -0.040754036 | 0.399237407 | -0.015476841 |
| -0.227018581 | 1.97E-06    | -0.110821095 | 0.02153735  | 0.128737387  |
| -0.467271579 | 1.04E-24    | -0.177468452 | 0.000216661 | 0.065692536  |
| 0.229785874  | 1.47E-06    | 0.140162236  | 0.003586686 | 0.056477282  |
| -0.316456983 | 1.86E-11    | -0.124924494 | 0.009511113 | 0.104396224  |
| 0.508606185  | 1.14E-29    | 0.341082939  | 3.56E-13    | -0.066947001 |
| 0.367692793  | 3.27E-15    | 0.214530591  | 7.19E-06    | -0.001733662 |
| -0.540672106 | 5.19E-34    | -0.302345776 | 1.54E-10    | 0.150912407  |
| 0.414098395  | 3.03E-19    | 0.373516025  | 1.10E-15    | 0.030200628  |
| 0.032871788  | 0.496603576 | 0.153861527  | 0.001372703 | 0.150812386  |
| 0.4391378    | 1.07E-21    | 0.262187063  | 3.43E-08    | 0.024199946  |
| -0.203580568 | 2.10E-05    | -0.331206284 | 1.82E-12    | 0.00354737   |
| -0.449137502 | 9.78E-23    | -0.212768711 | 8.58E-06    | 0.128136199  |
| 0.444952109  | 2.69E-22    | 0.255311019  | 7.96E-08    | -0.089308001 |
| 0.420146241  | 8.08E-20    | 0.255730215  | 7.57E-08    | 0.047337958  |
| -0.318637147 | 1.33E-11    | -0.126596399 | 0.008586354 | 0.094130628  |
| 0.257641562  | 6.00E-08    | 0.05068107   | 0.294380754 | 0.000750241  |
| 0.400752403  | 5.09E-18    | 0.321802061  | 8.13E-12    | 0.010270382  |
| 0.124532663  | 0.009740245 | 0.033103556  | 0.493571478 | 0.031917251  |
| -0.1504587   | 0.001755666 | 0.101872507  | 0.034701805 | 0.016341599  |
| -0.033402982 | 0.489668904 | -0.110318044 | 0.02214148  | -0.052946228 |
| 0.126385287  | 0.008698527 | 0.041869753  | 0.386445075 | -0.022207159 |
| -0.283771948 | 2.09E-09    | -0.134624782 | 0.005169897 | 0.090998582  |
| 0.517467397  | 8.01E-31    | 0.265944592  | 2.15E-08    | -0.008030897 |
| 0.511534771  | 4.79E-30    | 0.188761202  | 8.21E-05    | -0.020786719 |
| 0.451666571  | 5.28E-23    | 0.224194113  | 2.66E-06    | 0.057256958  |
| 0.239525806  | 5.01E-07    | 0.09639579   | 0.045744696 | 0.21703886   |
| -0.239955325 | 4.78E-07    | 0.005035685  | 0.917075006 | 0.112036679  |
| 0.3512303    | 6.27E-14    | 0.133927165  | 0.005408661 | -0.00754508  |
| 0.649451961  | 7.22E-53    | 0.354771425  | 3.37E-14    | -0.047213462 |
| 0.309098329  | 5.67E-11    | 0.199376653  | 3.12E-05    | -0.01121286  |
| 0.590983873  | 7.61E-42    | 0.33330355   | 1.29E-12    | -0.018731866 |
| -0.076380746 | 0.113748785 | -0.038328666 | 0.427907226 | -0.035022094 |
| 0.417356547  | 1.49E-19    | 0.177217701  | 0.000221239 | -0.046636648 |
| 0.27145399   | 1.06E-08    | 0.152935273  | 0.001468521 | -0.029104858 |
| -0.528241305 | 2.84E-32    | -0.338139046 | 5.82E-13    | 0.059518149  |
| -0.243820191 | 3.08E-07    | -0.119063869 | 0.013489862 | 0.057052268  |
| 0.268419323  | 1.57E-08    | 0.070007088  | 0.147267569 | 0.078952174  |
| 0.220353375  | 3.97E-06    | 0.142886093  | 0.002982114 | 0.002833174  |
| -0.275398558 | 6.37E-09    | -0.069308752 | 0.151355752 | 0.108660485  |

|              |             |              |             |              |
|--------------|-------------|--------------|-------------|--------------|
| 0.238150464  | 5.85E-07    | 0.113578063  | 0.01847404  | -0.01073256  |
| -0.166311543 | 0.000534553 | -0.052227309 | 0.27987791  | -0.016002218 |
| -0.322942407 | 6.80E-12    | -0.081687535 | 0.090682898 | 0.074626208  |
| -0.257318285 | 6.24E-08    | -0.049516459 | 0.305629957 | -0.049926662 |
| 0.416910134  | 1.64E-19    | 0.140693935  | 0.003460601 | -0.040258556 |
| -0.034991194 | 0.469248473 | 0.071302753  | 0.139906099 | -0.040403194 |
| -0.300494063 | 2.01E-10    | -0.133958114 | 0.005397862 | 0.03788151   |
| 0.097871627  | 0.042511914 | -0.031829297 | 0.510363427 | 0.05037788   |
| 0.297463092  | 3.11E-10    | 0.13655244   | 0.004558699 | -0.022589562 |
| 0.222359872  | 3.22E-06    | 0.193453788  | 5.39E-05    | 0.051965853  |
| 0.418059966  | 1.28E-19    | 0.12112867   | 0.011946249 | -0.03938717  |
| -0.158338376 | 0.000985535 | -0.021167487 | 0.661596732 | 0.059633707  |
| 0.186697883  | 9.84E-05    | 0.254804609  | 8.46E-08    | 0.111094734  |
| -0.027023626 | 0.576267689 | -0.048158388 | 0.319102041 | 0.046085909  |
| -0.480523664 | 3.17E-26    | -0.292428704 | 6.33E-10    | 0.160001825  |
| 0.045963081  | 0.341686141 | -0.079186201 | 0.10103925  | 0.081397199  |
| 0.461471828  | 4.59E-24    | 0.243671636  | 3.13E-07    | -0.017956458 |
| 0.298795259  | 2.57E-10    | 0.018030266  | 0.709278289 | 0.013857593  |
| 0.37867462   | 4.14E-16    | 0.124237313  | 0.009916185 | -0.019407075 |
| -0.202514352 | 2.33E-05    | -0.090116041 | 0.061895056 | 0.042049023  |
| 0.776024565  | 1.05E-87    | 0.469645479  | 5.64E-25    | -0.08504545  |
| 0.619593862  | 6.00E-47    | 0.30928722   | 5.52E-11    | -0.024170745 |
| 0.398026481  | 8.93E-18    | 0.158682603  | 0.000960397 | -0.050911182 |
| -0.354653164 | 3.44E-14    | -0.173406496 | 0.00030294  | 0.060980314  |
| 0.28929445   | 9.80E-10    | 0.160568278  | 0.000832881 | 0.012518139  |
| -0.148165685 | 0.002066498 | -0.056429669 | 0.242937896 | 0.075078193  |
| 0.247107156  | 2.10E-07    | 0.097960873  | 0.042322757 | -0.100343482 |
| 0.192098272  | 6.09E-05    | 0.008297726  | 0.863777639 | -0.005359084 |
| 0.204792537  | 1.87E-05    | 0.223757321  | 2.79E-06    | 0.057846527  |
| 0.101587925  | 0.035213835 | 0.02161583   | 0.654887429 | -0.172176747 |
| 0.459219439  | 8.10E-24    | 0.463727907  | 2.59E-24    | 0.001492262  |
| 0.49240476   | 1.21E-27    | 0.172818361  | 0.000317812 | -0.036030956 |
| 0.582718776  | 1.83E-40    | 0.546003048  | 8.85E-35    | -0.03801284  |
| 0.521846632  | 2.09E-31    | 0.406430442  | 1.56E-18    | -0.067129211 |
| -0.098633458 | 0.040919914 | 0.07598013   | 0.115661842 | 0.0655619    |
| -0.059107441 | 0.221261777 | -0.083653259 | 0.083156202 | -0.038060245 |
| -0.353348206 | 4.33E-14    | -0.025741277 | 0.594506512 | 0.065231105  |
| -0.297694559 | 3.01E-10    | -0.225346572 | 2.36E-06    | 0.017346942  |
| -0.157216704 | 0.00107172  | -0.090158052 | 0.061773121 | 0.068614502  |
| 0.514135402  | 2.20E-30    | 0.460638882  | 5.67E-24    | -0.041323429 |
| -0.065446954 | 0.17553255  | -0.146319972 | 0.002352385 | 0.051703452  |
| -0.049840774 | 0.302469171 | -0.012412771 | 0.797443309 | 0.068694079  |
| 0.385831504  | 1.03E-16    | 0.256859249  | 6.60E-08    | -0.032562684 |
| 0.523104082  | 1.42E-31    | 0.333226392  | 1.31E-12    | -0.013728519 |
| -0.529294047 | 2.04E-32    | -0.257132259 | 6.38E-08    | 0.06942561   |
| -0.150738823 | 0.001720784 | 0.091527804  | 0.057904731 | 0.045428163  |
| 0.132753956  | 0.005832648 | 0.103014506  | 0.03271034  | 0.004051638  |
| -0.286050844 | 1.53E-09    | -0.040884819 | 0.397724892 | 0.031821569  |
| 0.178080765  | 0.000205854 | 0.129690425  | 0.007083964 | -0.018536965 |
| 0.274607038  | 7.06E-09    | 0.163861336  | 0.000647028 | -0.060185949 |
| 0.590912957  | 7.82E-42    | 0.483049345  | 1.60E-26    | -0.083387838 |

|              |             |              |             |              |
|--------------|-------------|--------------|-------------|--------------|
| 0.183777976  | 0.000126848 | 0.056605965  | 0.241466623 | 0.058135576  |
| 0.214768444  | 7.02E-06    | 0.027126004  | 0.574822987 | 0.000835318  |
| 0.384871934  | 1.25E-16    | 0.16327736   | 0.000676893 | -0.068192806 |
| 0.344945692  | 1.85E-13    | 0.178762216  | 0.00019442  | 0.001227766  |
| -0.35673487  | 2.38E-14    | -0.195507038 | 4.47E-05    | 0.044713459  |
| 0.041235641  | 0.393684676 | -0.002085667 | 0.965603114 | -0.003271286 |
| 0.174651655  | 0.000273572 | -0.033170306 | 0.492700045 | 0.065018899  |
| 0.441511542  | 6.10E-22    | 0.171126355  | 0.000364481 | -0.024068621 |
| -0.044855853 | 0.353454087 | -0.042988171 | 0.373875187 | -0.080080302 |
| -0.547272819 | 5.78E-35    | -0.312202759 | 3.56E-11    | 0.097397073  |
| 0.36012136   | 1.30E-14    | 0.148529934  | 0.002013979 | 0.036080511  |
| 0.290516325  | 8.27E-10    | 0.157237604  | 0.001070053 | -0.018076486 |
| 0.226455086  | 2.10E-06    | 0.220534736  | 3.90E-06    | 0.066962904  |
| 0.360015234  | 1.32E-14    | 0.259830676  | 4.59E-08    | 0.005302939  |
| 0.163260676  | 0.000677765 | -0.004441732 | 0.926826711 | 0.024745347  |
| 0.3212695    | 8.83E-12    | 0.128905547  | 0.007440971 | -0.04106983  |
| 0.001807899  | 0.970181779 | -0.066853313 | 0.166415728 | 0.066400469  |
| 0.263386466  | 2.96E-08    | 0.248151337  | 1.86E-07    | 0.044977496  |
| -0.142079514 | 0.003150692 | 0.211024992  | 1.02E-05    | 0.0722391    |
| 0.658383661  | 9.04E-55    | 0.361417623  | 1.03E-14    | -0.070580785 |
| -0.035970822 | 0.45689075  | -0.132587182 | 0.005895283 | 0.032342018  |
| -0.394014111 | 2.02E-17    | -0.143886925 | 0.002784354 | 0.119602429  |
| 0.192904338  | 5.66E-05    | 0.121518058  | 0.011673309 | -0.013269633 |
| 0.181092727  | 0.000159655 | 0.127265682  | 0.008239207 | 0.065458689  |
| -0.055716459 | 0.248954018 | -0.01210162  | 0.802414729 | 0.061621521  |
| 0.643560299  | 1.20E-51    | 0.36901509   | 2.56E-15    | -0.055090915 |
| -0.252962047 | 1.06E-07    | 0.15960857   | 0.000895683 | 0.019639295  |
| 0.13183666   | 0.006184697 | 0.30883792   | 5.90E-11    | -0.055541927 |
| 0.364052163  | 6.37E-15    | 0.212980897  | 8.40E-06    | -0.061169596 |
| 0.118128186  | 0.014245397 | 0.166292995  | 0.000535331 | -0.001043136 |
| -0.271532839 | 1.05E-08    | -0.158991136 | 0.00093837  | -0.02292722  |
| 0.542317106  | 3.02E-34    | 0.374805939  | 8.65E-16    | -0.044931942 |
| 0.300198052  | 2.10E-10    | 0.067870714  | 0.16004485  | 0.00817328   |
| 0.153918906  | 0.00136696  | 0.070072934  | 0.146886479 | 0.034648292  |
| -0.17615038  | 0.000241752 | -0.047264    | 0.328182758 | -0.077555299 |
| 0.674220326  | 2.62E-58    | 0.430455787  | 7.98E-21    | -0.072509354 |
| -0.191735963 | 6.29E-05    | -0.069600149 | 0.149639511 | -0.011424417 |
| -0.415894401 | 2.05E-19    | -0.22238373  | 3.22E-06    | 0.129756216  |
| -0.258273335 | 5.56E-08    | -0.147307207 | 0.002195268 | 0.013808275  |
| -0.2251747   | 2.40E-06    | -0.140427063 | 0.003523375 | 0.133910693  |
| -0.168774131 | 0.00044003  | 0.004212602  | 0.930591635 | 0.074408197  |
| -0.047455207 | 0.326227537 | -0.064299909 | 0.183239162 | -0.02501087  |
| 0.129459485  | 0.007187383 | 0.211876872  | 9.37E-06    | -0.054726573 |
| 0.185518839  | 0.000109084 | 0.112785223  | 0.019313437 | -0.047318574 |
| 0.542409085  | 2.92E-34    | 0.344070326  | 2.15E-13    | -0.018590043 |
| 0.471489519  | 3.49E-25    | 0.150764787  | 0.001717584 | -0.014769773 |
| -0.246019034 | 2.39E-07    | 0.081319219  | 0.092152127 | 0.070458593  |
| -0.506593263 | 2.07E-29    | -0.277256383 | 4.99E-09    | 0.096523574  |
| -0.102841782 | 0.033005134 | 0.001653176  | 0.972732638 | -0.011292778 |
| 0.744509852  | 4.07E-77    | 0.442860263  | 4.43E-22    | -0.047910736 |
| 0.207345428  | 1.46E-05    | -0.018377974 | 0.70393312  | -0.024490559 |

|              |             |              |             |              |
|--------------|-------------|--------------|-------------|--------------|
| 0.083028316  | 0.085492372 | -0.018935434 | 0.695393938 | 0.003366417  |
| -0.130242423 | 0.006842144 | -0.014712534 | 0.760964858 | 0.004723422  |
| -0.174962517 | 0.000266667 | -0.00120564  | 0.980112457 | 0.072016047  |
| 0.14229945   | 0.003103887 | 0.062911397  | 0.1928989   | 0.00040259   |
| -0.016956167 | 0.72587924  | 0.195130789  | 4.63E-05    | -0.070956972 |
| 0.485720128  | 7.72E-27    | 0.327619496  | 3.24E-12    | -0.118087693 |
| 0.274793334  | 6.89E-09    | 0.192987946  | 5.62E-05    | -0.005644987 |
| -0.118102937 | 0.01426629  | -0.008339498 | 0.863098601 | 0.040258349  |
| 0.293986257  | 5.09E-10    | 0.175738213  | 0.00025014  | -0.018803559 |
| 0.190937574  | 6.76E-05    | 0.092383807  | 0.055590725 | -0.077918432 |
| -0.331341187 | 1.78E-12    | -0.166567276 | 0.000523924 | 0.040584948  |
| 0.361083961  | 1.09E-14    | 0.086199187  | 0.074166312 | -0.004963338 |
| -0.309199269 | 5.59E-11    | -0.105691235 | 0.028421298 | 0.079752748  |
| -0.393426167 | 2.27E-17    | -0.086246343 | 0.074007581 | 0.004412751  |
| 0.536023691  | 2.36E-33    | 0.344446619  | 2.01E-13    | -0.053202478 |
| 0.482064462  | 2.09E-26    | 0.277997262  | 4.52E-09    | -0.026150699 |
| -0.213041998 | 8.35E-06    | -0.129008544 | 0.007393223 | -0.017747377 |
| 0.241759764  | 3.89E-07    | 0.274430383  | 7.23E-09    | -0.01605374  |
| 0.371632971  | 1.57E-15    | 0.307580137  | 7.11E-11    | -0.017888644 |
| 0.734720789  | 3.86E-74    | 0.483764991  | 1.32E-26    | -0.152180941 |
| -0.143808372 | 0.002799433 | -0.103308186 | 0.032214263 | 0.067245452  |
| 0.253453461  | 9.95E-08    | 0.197345182  | 3.77E-05    | 0.014839545  |
| -0.051739388 | 0.28440113  | 0.048822153  | 0.312469813 | -0.066896815 |
| 0.151818523  | 0.001592196 | 0.14074706   | 0.003448226 | -0.050766283 |
| -0.597085812 | 6.85E-43    | -0.336371899 | 7.80E-13    | 0.147797465  |
| -0.264404332 | 2.60E-08    | -0.172711349 | 0.00032059  | -0.042011154 |
| 0.594700583  | 1.77E-42    | 0.329682457  | 2.32E-12    | -0.089904999 |
| -0.486336481 | 6.52E-27    | -0.289279802 | 9.82E-10    | 0.025777873  |
| 0.149649255  | 0.001860133 | -0.038036435 | 0.431440463 | 0.065921662  |
| 0.236989683  | 6.66E-07    | 0.175454296  | 0.000256074 | -0.012638823 |
| 0.139369006  | 0.003782541 | 0.028359377  | 0.557553854 | -0.028719719 |
| 0.631793366  | 2.74E-49    | 0.550586175  | 1.88E-35    | -0.085453052 |
| 0.318951142  | 1.27E-11    | 0.040939795  | 0.397090127 | 0.034975579  |
| -0.386816268 | 8.50E-17    | -0.26594967  | 2.14E-08    | 0.0998593    |
| 0.405608668  | 1.85E-18    | 0.186554539  | 9.97E-05    | -0.035804171 |
| -0.334235216 | 1.11E-12    | -0.152126681 | 0.001557148 | 0.065319673  |
| 0.231604235  | 1.20E-06    | 0.228436411  | 1.70E-06    | -0.010158805 |
| 0.596991005  | 7.12E-43    | 0.345867745  | 1.58E-13    | -0.066643105 |
| 0.119046004  | 0.013503951 | 0.009250055  | 0.848322701 | -0.030210352 |
| -0.172916878 | 0.000315274 | -0.043535134 | 0.367820743 | -0.095137673 |
| 0.18987694   | 7.43E-05    | 0.134381861  | 0.00525194  | -0.028529386 |
| 0.157706366  | 0.001033276 | -0.045187168 | 0.349906298 | -0.01487455  |
| -0.244538693 | 2.83E-07    | -0.069652973 | 0.149329983 | 0.048880439  |
| -0.031483032 | 0.514977346 | -0.14383486  | 0.00279434  | 0.048859964  |
| -0.302833339 | 1.43E-10    | -0.182501813 | 0.000141559 | 0.050609178  |
| 0.41982021   | 8.68E-20    | 0.553517163  | 6.93E-36    | 0.00941166   |
| 0.04375375   | 0.365417946 | -0.109236775 | 0.023489905 | 0.063753727  |
| -0.08323852  | 0.084700752 | -0.18224404  | 0.000144718 | 0.079398917  |
| 0.070630877  | 0.143687421 | 0.01246351   | 0.7966334   | -0.053818742 |
| -0.468200232 | 8.21E-25    | -0.223270829 | 2.93E-06    | 0.118564088  |
| -0.134815694 | 0.005106232 | 0.058244144  | 0.228093686 | -0.014242013 |

|              |             |              |             |              |
|--------------|-------------|--------------|-------------|--------------|
| -0.102666364 | 0.033306844 | 0.09800188   | 0.042236082 | 0.082075682  |
| -0.242178479 | 3.71E-07    | -0.20776796  | 1.40E-05    | -0.023285762 |
| -0.257160995 | 6.36E-08    | -0.04707716  | 0.33010063  | 0.062144608  |
| 0.483967633  | 1.25E-26    | 0.222671139  | 3.12E-06    | -0.029378646 |
| -0.233250069 | 1.01E-06    | -0.135045163 | 0.005030644 | -0.045219141 |
| 0.253544261  | 9.84E-08    | 0.126265765  | 0.008762611 | -0.098550354 |
| 0.09579742   | 0.047112984 | 0.017756347  | 0.71349923  | 0.02013939   |
| 0.388142773  | 6.54E-17    | 0.16903066   | 0.000431134 | -0.004522758 |
| -0.408748191 | 9.53E-19    | -0.283628695 | 2.13E-09    | 0.061302221  |
| 0.429580931  | 9.74E-21    | 0.170360414  | 0.000387641 | -0.047970061 |
| 0.016144391  | 0.738512013 | 0.136626713  | 0.004536512 | 0.002145506  |
| 0.425945265  | 2.22E-20    | 0.346092664  | 1.52E-13    | 0.004693091  |
| 0.536253466  | 2.19E-33    | 0.251827998  | 1.21E-07    | -0.059141535 |
| 0.06494646   | 0.178865046 | -0.022840558 | 0.636702081 | 0.005820445  |
| 0.119628834  | 0.013050955 | 0.014969453  | 0.756920708 | -0.006317476 |
| 0.127033391  | 0.008358249 | 0.137463591  | 0.004293167 | 0.100003882  |
| -0.350099066 | 7.63E-14    | -0.159230873 | 0.000921577 | 0.046962912  |
| 0.588791935  | 1.79E-41    | 0.457977139  | 1.11E-23    | -0.040000972 |
| 0.184573394  | 0.000118419 | 0.13359812   | 0.005524685 | 0.077569426  |
| 0.44741269   | 1.49E-22    | 0.247448452  | 2.02E-07    | -0.039006577 |
| -0.301443919 | 1.75E-10    | -0.180742175 | 0.000164483 | 0.145931279  |
| 0.205246962  | 1.79E-05    | 0.177082095  | 0.000223751 | 0.049555264  |
| 0.454618066  | 2.55E-23    | 0.157137518  | 0.00107806  | 0.001875244  |
| -0.06105737  | 0.206371377 | 0.100330097  | 0.0375546   | -0.047790603 |
| 0.700086877  | 1.37E-64    | 0.406890101  | 1.41E-18    | -0.048600116 |
| -0.168052882 | 0.000465965 | -0.024758909 | 0.608654034 | 0.043274724  |
| 0.470452308  | 4.57E-25    | 0.209032649  | 1.24E-05    | -0.031476352 |
| -0.417880569 | 1.33E-19    | -0.211263178 | 9.96E-06    | 0.158540634  |
| 0.330171387  | 2.15E-12    | 0.17694452   | 0.000226328 | -0.044571894 |
| -0.169382618 | 0.000419201 | -0.072717215 | 0.132195414 | -0.034523283 |
| 0.262332893  | 3.37E-08    | 0.058760343  | 0.223990842 | -0.00580568  |
| -0.311181876 | 4.15E-11    | -0.191131684 | 6.64E-05    | 0.019552363  |
| 0.13226477   | 0.006018087 | 0.188257386  | 8.58E-05    | 0.059697036  |
| 0.526712628  | 4.60E-32    | 0.354973297  | 3.25E-14    | -0.054998101 |
| -0.018351821 | 0.704334653 | 0.150327831  | 0.001772184 | 0.028468738  |
| 0.0853414    | 0.077102403 | -0.073607638 | 0.127512364 | 0.039386499  |
| 0.155943633  | 0.001177926 | 0.062650345  | 0.194755906 | 0.061092907  |
| -0.220040774 | 4.10E-06    | -0.183726443 | 0.000127413 | 0.029756199  |
| -0.054772767 | 0.257072741 | -0.084586798 | 0.079762707 | 0.064433287  |
| 0.299025007  | 2.48E-10    | 0.171181969  | 0.00036285  | -0.052591597 |
| -0.023091762 | 0.632998434 | 0.041324791  | 0.392661942 | -0.064817213 |
| -0.477356244 | 7.41E-26    | -0.322750446 | 7.00E-12    | -0.028384719 |
| -0.335674903 | 8.75E-13    | -0.297819249 | 2.95E-10    | 0.067986707  |
| 0.500770036  | 1.12E-28    | 0.224016321  | 2.71E-06    | -0.059104337 |
| -0.086849205 | 0.072002573 | 0.0403998    | 0.403351438 | 0.033753903  |
| 0.151609841  | 0.00161634  | 0.061388652  | 0.20391541  | 0.056980525  |
| -0.404503238 | 2.33E-18    | -0.159173164 | 0.000925594 | 0.096892535  |
| -0.041950578 | 0.385528157 | -0.127772345 | 0.00798479  | -0.021226819 |
| -0.233114836 | 1.02E-06    | -0.050714561 | 0.294061403 | 0.039432503  |
| -0.391508063 | 3.34E-17    | -0.224308872 | 2.63E-06    | 0.125215416  |
| -0.278810999 | 4.06E-09    | 0.029279766  | 0.544833127 | -0.013092694 |



|              |             |              |             |              |
|--------------|-------------|--------------|-------------|--------------|
| -0.382020025 | 2.17E-16    | -0.252278506 | 1.14E-07    | 0.102420587  |
| -0.077965309 | 0.10642438  | 0.132678321  | 0.00586098  | 0.051250631  |
| 0.501285751  | 9.69E-29    | 0.298272462  | 2.77E-10    | -0.032088393 |
| -0.143263468 | 0.002906094 | 0.024437858  | 0.61330981  | -0.026274148 |
| 0.254254163  | 9.04E-08    | 0.084602934  | 0.079705049 | 0.190999797  |
| 0.465277074  | 1.74E-24    | 0.159774536  | 0.000884519 | -0.022066638 |
| 0.076478473  | 0.113285903 | -0.00908387  | 0.851015633 | 0.04516883   |
| 0.666377134  | 1.57E-56    | 0.441655522  | 5.89E-22    | -0.036732767 |
| 0.059763678  | 0.216167166 | -0.133357077 | 0.005611094 | 0.111534708  |
| 0.143328131  | 0.002893246 | 0.016019712  | 0.740458597 | 0.085780996  |
| -0.309978759 | 4.97E-11    | -0.102819668 | 0.033043041 | 0.051168471  |
| 0.363243757  | 7.39E-15    | 0.060421264  | 0.211147048 | -0.032455808 |
| -0.282469608 | 2.49E-09    | -0.00712314  | 0.882910632 | -0.001828927 |
| 0.306127971  | 8.82E-11    | 0.156796449  | 0.001105762 | -0.037949127 |
| 0.42954533   | 9.82E-21    | 0.280094488  | 3.42E-09    | 0.006793407  |
| 0.182737689  | 0.000138725 | 0.120926352  | 0.012090276 | 0.011225574  |
| 0.82464939   | 5.73E-108   | 0.598166899  | 4.45E-43    | -0.115711977 |
| 0.277889483  | 4.59E-09    | 0.010452206  | 0.828896902 | 0.009142302  |
| -0.178357745 | 0.000201133 | -0.162826655 | 0.00070081  | -0.022187891 |
| -0.14023205  | 0.003569897 | 0.086912157  | 0.071795786 | -0.058192486 |
| 0.747107407  | 6.26E-78    | 0.492534665  | 1.17E-27    | -0.103827197 |
| 0.424224407  | 3.26E-20    | 0.278529343  | 4.21E-09    | -0.090938054 |
| 0.175309196  | 0.000259158 | -0.067804015 | 0.160456802 | 0.167626255  |
| -0.017051254 | 0.724404281 | 0.045758026  | 0.343846462 | 0.013133349  |
| 0.363895303  | 6.56E-15    | 0.284064171  | 2.01E-09    | 0.008491843  |
| -0.521650898 | 2.22E-31    | -0.381737437 | 2.29E-16    | 0.115462745  |
| -0.205369478 | 1.77E-05    | -0.127633214 | 0.008053946 | -0.072301956 |
| 0.054376045  | 0.260539871 | 0.022606504  | 0.640161047 | 0.012793104  |
| 0.23595422   | 7.47E-07    | 0.207072349  | 1.50E-05    | 0.067386052  |
| -0.293063967 | 5.79E-10    | -0.085929683 | 0.075078813 | 0.09775845   |
| 0.354083935  | 3.80E-14    | 0.230380478  | 1.38E-06    | -0.053110348 |
| 0.564469598  | 1.50E-37    | 0.44317043   | 4.11E-22    | -0.021633378 |
| -0.37498814  | 8.36E-16    | -0.254072705 | 9.24E-08    | 0.07960603   |
| 0.402475544  | 3.56E-18    | 0.335727142  | 8.67E-13    | -0.018264089 |
| -0.110410053 | 0.022029898 | -0.076407852 | 0.113620248 | -0.057495485 |
| 0.341552803  | 3.29E-13    | 0.184773561  | 0.000116382 | 0.001113088  |
| 0.253617166  | 9.76E-08    | 0.234113281  | 9.16E-07    | 0.009717915  |
| 0.408929559  | 9.17E-19    | 0.178470906  | 0.000199233 | 0.010473552  |
| -0.253286012 | 1.01E-07    | -0.093638473 | 0.052338184 | 0.132674511  |
| -0.418259699 | 1.22E-19    | -0.175789264 | 0.000249086 | 0.032023356  |
| 0.111383064  | 0.020879423 | -0.064620744 | 0.18105884  | 0.059290987  |
| -0.322318766 | 7.49E-12    | -0.169024868 | 0.000431333 | -0.028014865 |
| -0.269785752 | 1.32E-08    | -0.059332296 | 0.219506573 | 0.106187148  |
| 0.203598969  | 2.10E-05    | 0.180410614  | 0.000169175 | -0.086126132 |
| 0.052191465  | 0.280208529 | -0.118779923 | 0.013715321 | -0.028835282 |
| -0.043586969 | 0.367250145 | 0.100656352  | 0.036935126 | -0.081638023 |
| -0.431321264 | 6.55E-21    | -0.140816458 | 0.003432122 | -0.027383827 |
| -0.249300501 | 1.63E-07    | -0.147495335 | 0.002166438 | 0.099381504  |
| 0.104000958  | 0.03106944  | 0.055611861  | 0.249844986 | 0.022572817  |
| 0.060796524  | 0.208320179 | -0.002363451 | 0.961025317 | 0.028987337  |
| 0.313019058  | 3.15E-11    | 0.069975766  | 0.147449114 | -0.025283889 |

|              |             |              |             |              |
|--------------|-------------|--------------|-------------|--------------|
| 0.292080636  | 6.65E-10    | 0.111948449  | 0.020235184 | 0.027958869  |
| -0.220837725 | 3.78E-06    | -0.076960786 | 0.11102304  | 0.106835859  |
| -0.143299177 | 0.002898992 | -0.12426396  | 0.009900196 | -0.023530449 |
| -0.140561616 | 0.003491597 | -0.186169419 | 0.000103068 | 0.115087511  |
| 0.538301794  | 1.13E-33    | 0.360621894  | 1.19E-14    | -0.000777516 |
| 0.087653395  | 0.069397227 | 0.09790018   | 0.042451317 | -0.041741828 |
| -0.292425093 | 6.34E-10    | -0.163972211 | 0.000641497 | 0.089919464  |
| 0.369476199  | 2.35E-15    | 0.262461415  | 3.32E-08    | 0.064787091  |
| -0.316127706 | 1.96E-11    | -0.097809139 | 0.04264478  | 0.149105017  |
| 0.524744152  | 8.51E-32    | 0.279590182  | 3.66E-09    | -0.021052474 |
| 0.168734862  | 0.000441407 | -0.024097861 | 0.618257326 | -0.062522986 |
| 0.532345935  | 7.72E-33    | 0.340434285  | 3.97E-13    | -0.045901469 |
| 0.267593163  | 1.74E-08    | 0.143140837  | 0.002930602 | 0.008127745  |
| 0.570818458  | 1.53E-38    | 0.456689727  | 1.53E-23    | -0.039413524 |
| 0.180437469  | 0.00016879  | 0.025678544  | 0.595405469 | 0.103327985  |
| 0.215873536  | 6.28E-06    | 0.213578279  | 7.91E-06    | -0.014219015 |
| 0.303167799  | 1.36E-10    | 0.184466074  | 0.000119524 | -0.016732682 |
| 0.435271465  | 2.63E-21    | 0.19194506   | 6.18E-05    | 0.006782983  |
| -0.181192333 | 0.000158308 | -0.216077146 | 6.15E-06    | 0.014910111  |
| -0.397991602 | 8.99E-18    | -0.283389396 | 2.20E-09    | 0.00549875   |
| 0.375933496  | 6.99E-16    | 0.22570326   | 2.27E-06    | -0.055585969 |
| 0.186450303  | 0.000100568 | 0.081974577  | 0.089550937 | -0.01941729  |
| 0.117270407  | 0.014970457 | 0.157089864  | 0.001081892 | 0.032526431  |
| -0.458756679 | 9.10E-24    | -0.185327041 | 0.00011092  | 0.105571814  |
| -0.246439707 | 2.27E-07    | -0.076334047 | 0.113970499 | 0.128023613  |
| -0.316321319 | 1.90E-11    | -0.2350013   | 8.30E-07    | 0.09897823   |
| -0.268513911 | 1.55E-08    | -0.064705707 | 0.180484679 | -0.029843339 |
| -0.350983434 | 6.54E-14    | -0.220030177 | 4.11E-06    | 0.008019526  |
| 0.336594518  | 7.52E-13    | 0.212572202  | 8.75E-06    | 0.025217976  |
| 0.499578176  | 1.58E-28    | 0.248959735  | 1.69E-07    | -0.029615976 |
| -0.393089626 | 2.43E-17    | -0.227089055 | 1.96E-06    | 0.121948752  |
| -0.19335344  | 5.44E-05    | 0.070504396  | 0.144407913 | 0.065631375  |
| 0.524805877  | 8.35E-32    | 0.256076604  | 7.26E-08    | -0.100044618 |
| 0.442870947  | 4.41E-22    | 0.318888928  | 1.28E-11    | -0.039580584 |
| 0.108766659  | 0.024097977 | 0.059961784  | 0.214645863 | -0.043786469 |
| -0.309495706 | 5.35E-11    | -0.192212116 | 6.03E-05    | 0.128098175  |
| 0.011442551  | 0.812971113 | -0.085685889 | 0.075912114 | 0.00136816   |
| 0.0452304    | 0.349445029 | -0.006521787 | 0.892733302 | 0.063781554  |
| -0.382276504 | 2.07E-16    | -0.130133136 | 0.006889426 | 0.073218171  |
| 0.574988974  | 3.31E-39    | 0.505347046  | 2.98E-29    | -0.048906983 |
| 0.368428992  | 2.85E-15    | 0.304023832  | 1.20E-10    | 0.008873828  |
| -0.375717134 | 7.28E-16    | -0.163709047 | 0.000654696 | 0.078496353  |
| -0.177028264 | 0.000224756 | -0.20609176  | 1.65E-05    | 0.006474096  |
| -0.133388985 | 0.005599587 | -0.06216588  | 0.198236742 | 0.002455939  |
| -0.129755211 | 0.007055192 | -0.001842264 | 0.969615268 | -0.053746018 |
| 0.162615145  | 0.000712302 | 0.101162786  | 0.035990721 | -0.026577163 |
| -0.301604364 | 1.71E-10    | -0.122142944 | 0.011246812 | 0.074248055  |
| 0.203930912  | 2.03E-05    | 0.27159785   | 1.04E-08    | 0.007386237  |
| 0.376711505  | 6.02E-16    | 0.257224955  | 6.31E-08    | -0.055226052 |
| 0.656721042  | 2.07E-54    | 0.291961992  | 6.76E-10    | -0.104075869 |
| 0.29215352   | 6.58E-10    | 0.263287434  | 2.99E-08    | -0.046862652 |

|               |              |               |              |               |
|---------------|--------------|---------------|--------------|---------------|
| 0. 253566808  | 9. 81E-08    | 0. 236316624  | 7. 18E-07    | -0. 016451042 |
| 0. 1435761    | 0. 002844455 | 0. 093315556  | 0. 053159759 | 0. 112008087  |
| -0. 102215341 | 0. 034093395 | 0. 04802369   | 0. 320459047 | 0. 005348788  |
| 0. 311618467  | 3. 89E-11    | 0. 153443034  | 0. 00141526  | 0. 005303759  |
| 0. 515477373  | 1. 46E-30    | 0. 287415418  | 1. 27E-09    | -0. 052517067 |
| -0. 028996047 | 0. 548739052 | 0. 192829695  | 5. 70E-05    | 0. 023991263  |
| -0. 309249941 | 5. 55E-11    | -0. 065056669 | 0. 178127232 | 0. 03776868   |
| 0. 456035968  | 1. 79E-23    | 0. 198148486  | 3. 50E-05    | -0. 058913577 |
| 0. 509280663  | 9. 36E-30    | 0. 519373949  | 4. 48E-31    | 0. 001752333  |
| 0. 374160869  | 9. 77E-16    | 0. 267736079  | 1. 71E-08    | -0. 027460313 |
| 0. 378496762  | 4. 28E-16    | 0. 113787472  | 0. 018257717 | -0. 013124316 |
| 0. 406544439  | 1. 52E-18    | 0. 225204255  | 2. 39E-06    | -0. 032095241 |
| -0. 287711774 | 1. 22E-09    | -0. 08296705  | 0. 085724215 | 0. 078840963  |
| -0. 128653764 | 0. 007558855 | -0. 09051558  | 0. 060743406 | 0. 109953696  |
| -0. 111622254 | 0. 020604731 | -0. 007039111 | 0. 884282153 | 0. 017278119  |
| 0. 404847231  | 2. 17E-18    | 0. 243889639  | 3. 05E-07    | 0. 032319798  |
| -0. 152291331 | 0. 001538713 | 0. 175255238  | 0. 000260314 | -0. 058729028 |
| 0. 335467472  | 9. 05E-13    | 0. 272113713  | 9. 76E-09    | -0. 002088819 |
| 0. 372042472  | 1. 46E-15    | 0. 117702162  | 0. 014601553 | -0. 02082736  |
| 0. 117328533  | 0. 01492032  | -0. 034034956 | 0. 481486679 | 0. 014081383  |
| 0. 003686607  | 0. 939240227 | -0. 1742664   | 0. 000282362 | 0. 065280258  |
| -0. 508376222 | 1. 22E-29    | -0. 292994439 | 5. 85E-10    | 0. 082906863  |
| 0. 377063442  | 5. 63E-16    | 0. 305455046  | 9. 74E-11    | -0. 010084532 |
| -0. 178635914 | 0. 000196494 | -0. 200494694 | 2. 81E-05    | 0. 06174654   |
| -0. 202618381 | 2. 30E-05    | -0. 064727383 | 0. 180338416 | 0. 027469406  |
| 0. 339200686  | 4. 87E-13    | 0. 182164507  | 0. 000145707 | -0. 101673011 |
| 0. 335944496  | 8. 37E-13    | 0. 257292025  | 6. 26E-08    | -0. 000970898 |
| 0. 05181324   | 0. 283713341 | 0. 002589869  | 0. 95729494  | 0. 039269848  |
| -0. 429187374 | 1. 07E-20    | -0. 284404946 | 1. 92E-09    | 0. 00897059   |
| -0. 341703402 | 3. 20E-13    | -0. 172330053 | 0. 000330674 | 0. 097401915  |
| -0. 204349782 | 1. 95E-05    | -0. 186169089 | 0. 000103071 | 0. 041420253  |
| -0. 396853003 | 1. 13E-17    | -0. 254060697 | 9. 25E-08    | 0. 2174279    |
| -0. 366207584 | 4. 30E-15    | -0. 310234819 | 4. 79E-11    | 0. 095617256  |
| 0. 330811076  | 1. 94E-12    | 0. 017558801  | 0. 716548737 | -0. 039521444 |
| 0. 092950483  | 0. 054101491 | -0. 001464889 | 0. 975837216 | 0. 033327313  |
| 0. 525089767  | 7. 64E-32    | 0. 442957301  | 4. 32E-22    | -0. 030791767 |
| 0. 339389455  | 4. 72E-13    | 0. 22562691   | 2. 29E-06    | -0. 036254859 |
| -0. 235427596 | 7. 92E-07    | -0. 081914688 | 0. 089786173 | 0. 052921365  |
| -0. 07936088  | 0. 100286784 | -0. 019057229 | 0. 693533361 | 0. 002672981  |
| 0. 260064012  | 4. 46E-08    | 0. 119739091  | 0. 012966782 | 0. 045956009  |
| 0. 134346858  | 0. 005263858 | 0. 127936444  | 0. 007903905 | -0. 035456653 |
| 0. 365786217  | 4. 64E-15    | 0. 251342257  | 1. 28E-07    | -0. 03465614  |
| 0. 314328991  | 2. 58E-11    | 0. 085481252  | 0. 076617368 | 0. 092958127  |
| 0. 207501562  | 1. 44E-05    | 0. 105719625  | 0. 028378527 | 0. 06194922   |
| -0. 222469663 | 3. 19E-06    | -0. 026612158 | 0. 582091278 | 0. 07542239   |
| 0. 469393576  | 6. 02E-25    | 0. 422787833  | 4. 50E-20    | 0. 004464054  |
| 0. 244256845  | 2. 93E-07    | 0. 144438949  | 0. 002680456 | 0. 113877025  |
| -0. 407876483 | 1. 15E-18    | -0. 220892076 | 3. 76E-06    | 0. 041436437  |
| -0. 148643621 | 0. 001997838 | 0. 008584507  | 0. 859117842 | 0. 073666699  |
| -0. 40635077  | 1. 58E-18    | -0. 287288063 | 1. 29E-09    | 0. 135718297  |
| 0. 435301074  | 2. 62E-21    | 0. 406927908  | 1. 40E-18    | -0. 005806744 |

|               |              |               |              |               |
|---------------|--------------|---------------|--------------|---------------|
| 0. 577645944  | 1. 23E-39    | 0. 341146183  | 3. 52E-13    | -0. 037147748 |
| 0. 318504226  | 1. 36E-11    | 0. 037513306  | 0. 437807287 | 0. 05569923   |
| 0. 253800332  | 9. 54E-08    | 0. 160414551  | 0. 000842659 | 0. 049275168  |
| 0. 229584371  | 1. 50E-06    | 0. 117292997  | 0. 014950954 | 0. 065620798  |
| 0. 541870987  | 3. 49E-34    | 0. 364692856  | 5. 67E-15    | -0. 014220912 |
| 0. 628897029  | 1. 01E-48    | 0. 412708894  | 4. 09E-19    | -0. 051714751 |
| 0. 531382675  | 1. 05E-32    | 0. 279837091  | 3. 54E-09    | -0. 060856969 |
| 0. 645642057  | 4. 48E-52    | 0. 430676036  | 7. 59E-21    | -0. 073583849 |
| -0. 401141531 | 4. 70E-18    | -0. 230463236 | 1. 36E-06    | 0. 147978145  |
| 0. 442626068  | 4. 68E-22    | 0. 213885409  | 7. 67E-06    | -0. 030545602 |
| 0. 347859435  | 1. 12E-13    | 0. 291415138  | 7. 30E-10    | -0. 075084826 |
| 0. 538935482  | 9. 17E-34    | 0. 374613663  | 8. 97E-16    | -0. 028492991 |
| 0. 537415452  | 1. 50E-33    | 0. 427915561  | 1. 42E-20    | -0. 032411135 |
| 0. 541128162  | 4. 46E-34    | 0. 401435517  | 4. 42E-18    | -0. 048343839 |
| 0. 321485413  | 8. 54E-12    | 0. 294103836  | 5. 00E-10    | -0. 020321588 |
| 0. 652129205  | 1. 97E-53    | 0. 574245508  | 4. 35E-39    | -0. 045576538 |
| -0. 039262821 | 0. 416725978 | -0. 186156765 | 0. 000103182 | 0. 023031271  |
| -0. 194212974 | 5. 03E-05    | -0. 05161629  | 0. 285550032 | 0. 171136923  |
| -0. 494835136 | 6. 11E-28    | -0. 371612576 | 1. 58E-15    | -0. 003345299 |
| 0. 154606344  | 0. 001299859 | 0. 175619578  | 0. 000252604 | -0. 076170108 |
| -0. 119777378 | 0. 012937665 | 0. 017898661  | 0. 711305153 | 0. 12027435   |
| -0. 191497637 | 6. 43E-05    | -0. 114327577 | 0. 01770995  | 0. 045680939  |
| 0. 115837012  | 0. 01625451  | -0. 129280901 | 0. 00726828  | 0. 011574581  |
| 0. 422405172  | 4. 90E-20    | 0. 185505926  | 0. 000109207 | -0. 032911158 |
| -0. 34790398  | 1. 11E-13    | -0. 082755277 | 0. 086529507 | 0. 07610894   |
| 0. 391418438  | 3. 40E-17    | 0. 124386095  | 0. 009827206 | -0. 081516205 |
| -0. 349306972 | 8. 75E-14    | -0. 14556712  | 0. 002479022 | 0. 077419494  |
| 0. 539810024  | 6. 88E-34    | 0. 272984527  | 8. 72E-09    | -0. 059654334 |
| 0. 531558116  | 9. 93E-33    | 0. 487849021  | 4. 30E-27    | -0. 048787432 |
| 0. 237184235  | 6. 52E-07    | 0. 225995297  | 2. 20E-06    | 0. 01682475   |
| -0. 428978218 | 1. 12E-20    | -0. 189036147 | 8. 01E-05    | 0. 016863376  |
| -0. 346345449 | 1. 46E-13    | -0. 264247608 | 2. 65E-08    | 0. 174782822  |
| 0. 295039719  | 4. 38E-10    | 0. 177482763  | 0. 000216403 | 0. 022003626  |
| 0. 060321883  | 0. 211900298 | 0. 113974     | 0. 018066895 | 0. 012517761  |
| -0. 306411936 | 8. 46E-11    | -0. 156824134 | 0. 001103489 | 0. 118067684  |
| -0. 195048268 | 4. 66E-05    | -0. 075696958 | 0. 117029206 | 0. 037998501  |
| 0. 403711643  | 2. 75E-18    | 0. 203176695  | 2. 18E-05    | -0. 008763245 |
| -0. 209031046 | 1. 24E-05    | -0. 061909849 | 0. 200094508 | -0. 010671144 |
| 0. 000302146  | 0. 995015494 | -0. 159378649 | 0. 000911365 | 0. 007620696  |
| -0. 248518636 | 1. 78E-07    | 0. 047309383  | 0. 327718002 | 0. 020720628  |

| MEagenta    | MEpink       | MEpink      | MEred        | MEred       | MEturquoise  |
|-------------|--------------|-------------|--------------|-------------|--------------|
| 0.156279168 | 0.087650775  | 0.069405588 | -0.132184285 | 0.006049098 | -0.281254872 |
| 0.84847596  | 0.122118807  | 0.011263026 | 0.193286526  | 5.47E-05    | 0.201918158  |
| 0.277769321 | 0.008871198  | 0.854464388 | -0.217528276 | 5.31E-06    | -0.296273758 |
| 0.650327906 | -0.053307991 | 0.270033809 | -0.033322038 | 0.49072225  | -0.078944935 |
| 0.762201259 | 0.036876852  | 0.445625503 | 0.080569143  | 0.095203111 | 0.024063147  |
| 0.699333124 | -0.017635393 | 0.715365852 | -0.035010123 | 0.469007955 | 0.124830897  |
| 0.623119271 | 0.06474449   | 0.180223041 | 0.298878441  | 2.54E-10    | 0.315871159  |
| 0.046235194 | 0.060103372  | 0.2135633   | -0.145808232 | 0.002437804 | -0.280660296 |
| 0.614827261 | -0.086812298 | 0.072124031 | 0.063759434  | 0.186955842 | -0.031392222 |
| 0.243011447 | -0.02461243  | 0.610776277 | 0.374197312  | 9.70E-16    | 0.299126952  |
| 0.2643651   | -0.013428228 | 0.781276722 | -0.039471688 | 0.414249668 | -0.127947483 |
| 0.033618794 | -0.025987386 | 0.59098579  | -0.143649907 | 0.002830078 | 0.080210608  |
| 0.011014315 | 0.060126343  | 0.213388034 | 0.14514674   | 0.002552409 | -0.127511969 |
| 0.090634601 | 0.083648766  | 0.083172814 | -0.037536752 | 0.437520787 | -0.107290737 |
| 0.713965569 | 0.146449969  | 0.002331125 | -0.015623764 | 0.746651379 | 0.065075091  |
| 0.13198555  | 0.080979548  | 0.093523923 | -0.102008398 | 0.03445955  | -0.119750928 |
| 0.449315598 | -0.042288628 | 0.381707536 | -0.286536692 | 1.43E-09    | -0.291463083 |
| 0.332469892 | 0.077168438  | 0.110059819 | 0.201564438  | 2.54E-05    | 0.204616412  |
| 0.000289716 | 0.009630314  | 0.842167502 | -0.209556831 | 1.18E-05    | -0.262387791 |
| 0.620584496 | 0.307042548  | 7.70E-11    | 0.302938828  | 1.41E-10    | 0.299025953  |
| 0.167573248 | -0.067198147 | 0.164235458 | 0.090764483  | 0.060034945 | 0.04591279   |
| 0.838013736 | 0.251433212  | 1.27E-07    | 0.19685137   | 3.95E-05    | 0.016679745  |
| 0.594582224 | 0.129851055  | 0.007012818 | 0.135824526  | 0.004781386 | 0.027935611  |
| 0.649147868 | 0.092446548  | 0.055424183 | 0.212177226  | 9.10E-06    | 0.074544616  |
| 0.36679925  | -0.077938171 | 0.106546606 | -0.064807453 | 0.179798877 | -0.099058453 |
| 0.347526785 | 0.042642727  | 0.377730453 | -0.134035977 | 0.005370779 | -0.230798088 |
| 0.491333068 | 0.042689476  | 0.377207294 | 0.007194328  | 0.88174899  | -0.040855946 |
| 0.228643313 | 0.152124798  | 0.00155736  | 0.150612799  | 0.001736398 | 0.188427715  |
| 0.060474603 | -0.007144433 | 0.882563152 | -0.178919622 | 0.000191865 | -0.301414085 |
| 0.46441536  | 0.050889529  | 0.292396772 | 0.220670977  | 3.84E-06    | 0.179511822  |
| 0.420963376 | -0.089064605 | 0.065012036 | -0.260284782 | 4.34E-08    | -0.198579649 |
| 0.549561964 | 0.015558518  | 0.747673433 | 0.232034382  | 1.15E-06    | 0.350732627  |
| 0.889710226 | -0.036107725 | 0.455178396 | -0.056481985 | 0.242500643 | -0.155167717 |
| 0.733146982 | 0.022569743  | 0.640705034 | -0.043829262 | 0.364590281 | -0.028749052 |
| 0.544113125 | 0.001203658  | 0.980145143 | -0.03907627  | 0.418945048 | -0.042086409 |
| 0.003695151 | 0.196000235  | 4.27E-05    | 0.183053883  | 0.000135009 | -0.043444844 |
| 0.61365364  | 0.065626343  | 0.174349415 | 0.075119778  | 0.11985539  | 0.020327652  |
| 0.295847254 | 0.09424445   | 0.050824988 | -0.118047985 | 0.014311855 | -0.267326363 |
| 0.957656837 | 0.069237631  | 0.151776893 | 0.033562466  | 0.487597038 | 0.083458869  |
| 0.090160072 | 0.138064887  | 0.004125674 | 0.183838579  | 0.000126186 | 0.195700762  |
| 0.062168064 | -0.24869667  | 1.75E-07    | -0.035060227 | 0.468371647 | 0.07469681   |
| 0.989153614 | 0.331515541  | 1.73E-12    | 0.253673618  | 9.69E-08    | 0.314207186  |
| 0.204609742 | 0.116330741  | 0.01580173  | 0.143939467  | 0.002774309 | 0.287396212  |
| 0.839591327 | 0.029550014  | 0.541125492 | 0.021826416  | 0.651745594 | 0.113260986  |
| 0.657801331 | 0.056603435  | 0.241487694 | -0.374713331 | 8.80E-16    | -0.34204503  |
| 0.943751128 | -0.032012339 | 0.507933158 | 0.091577632  | 0.05776788  | 0.096562566  |
| 0.817321588 | 0.018827698  | 0.697041281 | 0.022040617  | 0.648556151 | -0.027948566 |
| 0.210195263 | 0.045113666  | 0.350691417 | 0.370458444  | 1.96E-15    | 0.287153022  |
| 0.006799667 | 0.049281658  | 0.307931908 | 0.200171114  | 2.90E-05    | 0.079889908  |
| 0.069177419 | 0.197395043  | 3.76E-05    | 0.153214257  | 0.001439033 | -0.005353866 |

|              |               |              |               |              |               |
|--------------|---------------|--------------|---------------|--------------|---------------|
| 0. 181843522 | 0. 101774715  | 0. 034877036 | 0. 061779784  | 0. 201043106 | -0. 076658125 |
| 0. 649207831 | 0. 049717486  | 0. 303668175 | -0. 000705576 | 0. 988360443 | 0. 01703346   |
| 0. 010593911 | 0. 033225524  | 0. 491979802 | -0. 028972333 | 0. 549066143 | -0. 08551486  |
| 0. 163092755 | 0. 059496323  | 0. 218232492 | -0. 023315589 | 0. 629706116 | 0. 06177589   |
| 0. 036218699 | -0. 030394563 | 0. 529620349 | 0. 003260997  | 0. 946243518 | 0. 131664318  |
| 0. 656515979 | 0. 051070669  | 0. 290680078 | -0. 105345984 | 0. 02894587  | -0. 058074487 |
| 0. 044013405 | 0. 038747552  | 0. 422872043 | 0. 020014849  | 0. 678969261 | -0. 095569462 |
| 0. 336166613 | -0. 148171485 | 0. 002065652 | -0. 074699694 | 0. 121945636 | 0. 253421655  |
| 0. 983387484 | 0. 140706601  | 0. 003457647 | 0. 40371505   | 2. 75E-18    | 0. 178479593  |
| 0. 078230959 | 0. 028609408  | 0. 554083953 | 0. 136545652  | 0. 004560732 | 0. 056972286  |
| 0. 890989032 | 0. 076511443  | 0. 113130071 | -0. 181788101 | 0. 00015047  | -0. 00509045  |
| 0. 08112344  | 0. 068608592  | 0. 155540534 | 0. 349985233  | 7. 78E-14    | 0. 105944552  |
| 0. 105485883 | 0. 007513316  | 0. 876546891 | 0. 13021373   | 0. 00685453  | 0. 148607525  |
| 0. 903617707 | 0. 053770438  | 0. 265894479 | 0. 001793073  | 0. 970426206 | 0. 101842159  |
| 0. 053427377 | 0. 012473533  | 0. 796473431 | 0. 076849083  | 0. 111543925 | 0. 079303639  |
| 0. 435854786 | -0. 021579303 | 0. 655433017 | -0. 006785635 | 0. 888421428 | 0. 060771887  |
| 0. 247368353 | 0. 021027069  | 0. 663703659 | -0. 038001633 | 0. 43186236  | -0. 065785329 |
| 0. 011758989 | 0. 039964599  | 0. 408440264 | 0. 13903438   | 0. 00386803  | 0. 211889668  |
| 0. 365429779 | 0. 040187872  | 0. 405824774 | 0. 019100353  | 0. 692875012 | 0. 056512348  |
| 0. 424782773 | 0. 074380819  | 0. 123551161 | -0. 053975289 | 0. 264074858 | -0. 078625289 |
| 0. 02968665  | -0. 012661311 | 0. 793478117 | -0. 058419432 | 0. 226694523 | 0. 05138666   |
| 0. 68996818  | -0. 085744566 | 0. 075710871 | 0. 19088301   | 6. 79E-05    | 0. 423336696  |
| 0. 874693671 | -0. 010188168 | 0. 833155046 | 0. 052160137  | 0. 280497714 | 0. 083589639  |
| 0. 403247159 | -0. 016238173 | 0. 737048913 | 0. 003071205  | 0. 94936785  | 0. 132814825  |
| 0. 324577251 | -0. 015077389 | 0. 755223668 | 0. 014704422  | 0. 761092664 | 0. 04500599   |
| 0. 689172649 | 0. 197442677  | 3. 74E-05    | 0. 005415996  | 0. 910837374 | -0. 026291447 |
| 0. 82631906  | 0. 014910519  | 0. 757847806 | 0. 051486489  | 0. 286764884 | 0. 090538923  |
| 0. 912716475 | -0. 033650289 | 0. 486458146 | 0. 134714783  | 0. 005139796 | 0. 203293051  |
| 0. 97336218  | 0. 069056811  | 0. 152851621 | 0. 061805185  | 0. 200857588 | 0. 200844825  |
| 0. 976828003 | 0. 041186107  | 0. 394253616 | 0. 052871055  | 0. 273985051 | 0. 035484     |
| 0. 016361167 | -0. 02684552  | 0. 578785093 | 0. 056883252  | 0. 239165198 | 0. 163986458  |
| 0. 76131526  | 0. 289293453  | 9. 80E-10    | 0. 253871702  | 9. 46E-08    | 0. 179156483  |
| 0. 910485184 | 0. 009958331  | 0. 836865628 | -0. 034110759 | 0. 480510255 | -0. 039352715 |
| 0. 648629936 | 0. 098753498  | 0. 040673717 | -0. 027957357 | 0. 563155033 | -0. 025086731 |
| 0. 400691724 | -0. 031464212 | 0. 515228729 | 0. 010199417  | 0. 832973543 | 0. 034899469  |
| 0. 14828176  | 0. 10797353   | 0. 025154696 | -0. 106442541 | 0. 027307905 | -0. 145608272 |
| 0. 735494296 | 0. 216917289  | 5. 65E-06    | 0. 144470814  | 0. 002674568 | 0. 070985148  |
| 0. 101523099 | 0. 026562389  | 0. 582797518 | 0. 02972892   | 0. 538677937 | 0. 00178599   |
| 0. 202041413 | 0. 101589363  | 0. 035211232 | -0. 019357149 | 0. 688959518 | 0. 007818812  |
| 0. 711263071 | 0. 010919727  | 0. 821369521 | 0. 129281397  | 0. 007268054 | 0. 163511227  |
| 0. 081870914 | 0. 04868993   | 0. 313783691 | -0. 211216978 | 1. 00E-05    | -0. 223461771 |
| 0. 307534244 | -0. 019983989 | 0. 679436776 | 0. 102785931  | 0. 033100942 | 0. 272625457  |
| 0. 025301423 | -0. 004811012 | 0. 920762378 | -0. 136463082 | 0. 004585523 | -0. 125490159 |
| 0. 207592599 | 0. 049480904  | 0. 305977792 | 0. 08760199   | 0. 069561425 | 0. 064693797  |
| 0. 865644338 | -0. 169076271 | 0. 00042957  | -0. 105338537 | 0. 028957276 | -0. 117474116 |
| 0. 386929993 | -0. 029050454 | 0. 54798897  | 0. 029491322  | 0. 54192964  | 0. 019083121  |
| 0. 058729647 | 0. 093937314  | 0. 051587316 | -0. 100599785 | 0. 037041907 | 0. 060247858  |
| 0. 578297712 | 0. 055590611  | 0. 250026259 | 0. 276207275  | 5. 73E-09    | 0. 269117321  |
| 0. 819944547 | 0. 014300916  | 0. 767457663 | 0. 085381076  | 0. 076964543 | -0. 004782505 |
| 0. 988630312 | -0. 149814678 | 0. 001838332 | 0. 006887183  | 0. 886762778 | 0. 211345336  |
| 0. 854469398 | -0. 062345378 | 0. 196941815 | -0. 286032704 | 1. 53E-09    | -0. 273733002 |

|             |              |             |              |             |              |
|-------------|--------------|-------------|--------------|-------------|--------------|
| 0.854225005 | 0.066828944  | 0.166570624 | 0.060952338  | 0.207154487 | 0.207265294  |
| 0.994130209 | -0.006161616 | 0.898624388 | 0.03970964   | 0.411439131 | 0.152440956  |
| 0.952196545 | -0.028672138 | 0.553215057 | 0.034580206  | 0.474487297 | 0.034652245  |
| 0.197574233 | 0.124813262  | 0.009575666 | 0.006563859  | 0.892045535 | -0.149801732 |
| 0.676347402 | 0.206857449  | 1.53E-05    | 0.080644784  | 0.094891827 | -0.065995391 |
| 0.334145812 | 0.044656065  | 0.355604367 | -0.288406712 | 1.11E-09    | -0.336622295 |
| 0.460154644 | 0.037347029  | 0.439842219 | 0.043235707  | 0.371127581 | 0.118603383  |
| 0.640780645 | -0.066036716 | 0.171665174 | -0.136299674 | 0.004634943 | -0.101059006 |
| 0.733436737 | 0.051134868  | 0.290073275 | 0.100086327  | 0.038023189 | 0.086409811  |
| 0.220423227 | 0.118329668  | 0.014079635 | 0.160214194  | 0.000855562 | 0.31019387   |
| 0.606643996 | -0.120426731 | 0.012452539 | 0.030591379  | 0.526957076 | 0.137288613  |
| 0.635385164 | 0.001150691  | 0.981018688 | 0.131070504  | 0.006493227 | 0.055012701  |
| 0.830640199 | -0.002555931 | 0.957854039 | 0.201601568  | 2.54E-05    | 0.148041731  |
| 0.508443378 | 0.020926348  | 0.665216566 | -0.035654731 | 0.460858113 | -0.127174129 |
| 0.010013464 | -0.060958728 | 0.207106784 | -0.028292175 | 0.558488275 | -0.004790749 |
| 0.618553223 | 0.007868298  | 0.870764029 | -0.013530019 | 0.779661214 | -0.032084148 |
| 0.764849787 | -0.009776131 | 0.839809698 | -0.148620143 | 0.002001162 | -0.284115989 |
| 0.376264657 | -0.032018804 | 0.507847437 | 0.002442072  | 0.959729881 | 0.027308302  |
| 0.173441967 | 0.059751825  | 0.216258429 | 0.080964794  | 0.093583877 | 0.212639321  |
| 0.855795764 | 0.045034655  | 0.351536632 | -0.000374757 | 0.993817655 | -0.255902238 |
| 0.508918103 | 0.084873818  | 0.078742203 | -0.021121045 | 0.662293279 | 0.023112181  |
| 0.476338677 | 0.193929699  | 5.16E-05    | 0.214633061  | 7.12E-06    | 0.285057095  |
| 0.549842018 | 0.061719949  | 0.201480591 | 0.056737923  | 0.240369473 | 0.126168443  |
| 0.000129616 | 0.074300822  | 0.123956515 | -0.004938479 | 0.918670156 | -0.044054664 |
| 0.210652416 | 0.083162689  | 0.084985643 | 0.047217356  | 0.328660877 | 0.022087758  |
| 0.818370406 | 0.160066876  | 0.000865166 | 0.151926648  | 0.001579817 | 0.298010741  |
| 0.860767337 | -0.112000133 | 0.020177162 | -0.051533604 | 0.286323521 | 0.118540742  |
| 0.126963657 | 0.031447512  | 0.515451859 | -0.0608989   | 0.207553741 | -0.051570344 |
| 0.098598827 | 0.141183188  | 0.003348146 | 0.107390324  | 0.025957011 | -0.174226057 |
| 0.26640316  | 0.15389091   | 0.001369759 | 0.157449767  | 0.00105326  | 0.243142818  |
| 0.14759553  | -0.05566797  | 0.249366768 | -0.143978893 | 0.002766794 | -0.158270598 |
| 0.105077357 | -0.017015742 | 0.724955025 | 0.033034538  | 0.494473364 | 0.072786833  |
| 0.010931763 | 0.00401779   | 0.933793906 | 0.019523398  | 0.686429059 | -0.207384476 |
| 0.52966237  | -0.067883861 | 0.159963743 | 0.105830744  | 0.028211654 | 0.037980673  |
| 0.746238647 | 0.055626082  | 0.249723723 | 0.142063426  | 0.003154141 | 0.206504583  |
| 0.777057209 | 0.101193801  | 0.035933558 | -0.029210589 | 0.545784202 | -0.10573185  |
| 0.849445455 | -0.187597798 | 9.09E-05    | -0.160586339 | 0.000831739 | -0.27627935  |
| 0.808895652 | -0.119830345 | 0.012897479 | -0.010295489 | 0.831423677 | -0.006798151 |
| 0.961869609 | -0.033765441 | 0.484967023 | 0.268311935  | 1.59E-08    | 0.317497682  |
| 0.393668881 | 0.095892627  | 0.046893008 | 0.239274282  | 5.16E-07    | 0.141644986  |
| 0.350217022 | -0.072245288 | 0.134730705 | -0.082642258 | 0.08696176  | 0.02615055   |
| 0.019921973 | -0.031891273 | 0.509539893 | 0.062666445  | 0.194641002 | 0.222883063  |
| 0.478099426 | 0.021539919  | 0.656021475 | 0.01983471   | 0.681700025 | 0.154596928  |
| 0.069317029 | -0.018051337 | 0.708953972 | -0.283666208 | 2.12E-09    | -0.333171034 |
| 0.937700599 | 0.005452667  | 0.910236193 | 0.122359034  | 0.011102567 | 0.021250731  |
| 0.752428659 | 0.072280565  | 0.134539903 | 0.053180778  | 0.271180168 | 0.11272241   |
| 0.730033561 | -0.103490114 | 0.031910188 | -0.228111348 | 1.76E-06    | -0.111561442 |
| 0.057157426 | -0.082303407 | 0.088268152 | 0.123209212  | 0.010550828 | 0.037184883  |
| 0.533036467 | 0.094798981  | 0.049472428 | 0.22909656   | 1.58E-06    | 0.326205786  |
| 0.490930255 | 0.067869601  | 0.160051716 | -0.107177293 | 0.026255525 | -0.110412665 |
| 0.931630719 | 0.041363468  | 0.392218733 | 0.038301837  | 0.428230903 | 0.118158887  |

|              |               |              |               |              |               |
|--------------|---------------|--------------|---------------|--------------|---------------|
| 0. 610432412 | 0. 170613591  | 0. 000379838 | 0. 039738445  | 0. 411099669 | -0. 012405176 |
| 0. 810951341 | 0. 170080866  | 0. 00039643  | 0. 157527504  | 0. 001047169 | 0. 063561886  |
| 0. 001110071 | 0. 046270482  | 0. 338463821 | -0. 068830344 | 0. 154205785 | -0. 249835331 |
| 0. 158187531 | -0. 043848496 | 0. 364379641 | -0. 04199839  | 0. 384986379 | -0. 083193945 |
| 0. 222491629 | 0. 035404479  | 0. 464012675 | 0. 111802855  | 0. 02039941  | 0. 055867442  |
| 0. 830791854 | -0. 142101254 | 0. 003146037 | -0. 004568106 | 0. 924750882 | 0. 19127071   |
| 0. 545099312 | -0. 097586044 | 0. 043121999 | 0. 069543551  | 0. 149971696 | 0. 187598002  |
| 0. 75055476  | 0. 06201978   | 0. 199295303 | 0. 12447904   | 0. 009771981 | 0. 113172329  |
| 0. 67120899  | 0. 033062473  | 0. 494108223 | -0. 027233343 | 0. 573310109 | 0. 070904938  |
| 0. 910585149 | 0. 086995906  | 0. 07152144  | -0. 026996297 | 0. 576653639 | -0. 029015136 |
| 0. 655022535 | -0. 128861749 | 0. 007461358 | -0. 068152581 | 0. 158312755 | -0. 115680246 |
| 0. 562433653 | 0. 097305509  | 0. 043728463 | 0. 119584689  | 0. 013084791 | 0. 128528421  |
| 0. 863642224 | -0. 04035954  | 0. 403820596 | 0. 04093585   | 0. 397135654 | 0. 213219503  |
| 0. 740153737 | 0. 007192618  | 0. 881776897 | -0. 086686369 | 0. 072539714 | -0. 086858863 |
| 0. 021792749 | 0. 150312814  | 0. 001774088 | 0. 181244385  | 0. 000157608 | 0. 04358611   |
| 0. 008017647 | 0. 039377062  | 0. 41537047  | -0. 113404514 | 0. 01865501  | -0. 325069302 |
| 0. 574170091 | -0. 151301152 | 0. 001652671 | -0. 145117867 | 0. 002557522 | -0. 069890642 |
| 0. 959047168 | -0. 088152704 | 0. 067818792 | 0. 023043689  | 0. 633706495 | -0. 10068573  |
| 0. 200302921 | 0. 093042711  | 0. 053862281 | -0. 034431762 | 0. 476387339 | -0. 049461096 |
| 0. 565615082 | 0. 059827243  | 0. 215678192 | 0. 001123763  | 0. 981462808 | -0. 034589724 |
| 0. 727886802 | 0. 022051601  | 0. 648392769 | -0. 098183552 | 0. 041853883 | -0. 197772077 |
| 0. 346691482 | -0. 123102595 | 0. 01061866  | -0. 082663542 | 0. 086880226 | -0. 016093232 |
| 0. 877968228 | 0. 182845731  | 0. 000137444 | 0. 15156411   | 0. 001621676 | -0. 116613258 |
| 0. 073680957 | 0. 024615946  | 0. 610725291 | 0. 041803512  | 0. 38719754  | 0. 16420117   |
| 0. 168367957 | 0. 135489023  | 0. 004887289 | 0. 231962733  | 1. 16E-06    | 0. 240790445  |
| 0. 331849214 | 0. 070046127  | 0. 147041534 | 0. 115578449  | 0. 01649613  | 0. 21262652   |
| 0. 833583643 | 0. 025955419  | 0. 591442545 | 0. 004576675  | 0. 924610156 | 0. 138544193  |
| 0. 831441072 | 0. 099272809  | 0. 039622994 | -0. 131205115 | 0. 00643804  | -0. 236656851 |
| 0. 048251161 | 0. 071949022  | 0. 136341339 | -0. 104926075 | 0. 029595053 | -0. 163457299 |
| 0. 691310605 | 0. 028826499  | 0. 551079761 | 0. 181527461  | 0. 000153853 | 0. 109935796  |
| 0. 359004942 | -0. 001482657 | 0. 975544234 | -0. 047632045 | 0. 324425965 | -0. 07612419  |
| 0. 742699135 | -0. 018170526 | 0. 707120395 | -0. 058343284 | 0. 22730159  | -0. 090834903 |
| 0. 947564386 | -0. 01928922  | 0. 689994461 | 0. 329223391  | 2. 50E-12    | 0. 346598342  |
| 0. 37216824  | 0. 046519653  | 0. 335866201 | -0. 297694665 | 3. 00E-10    | -0. 298840758 |
| 0. 76228897  | 0. 027311162  | 0. 572214476 | 0. 057936797  | 0. 230561724 | 0. 119717936  |
| 0. 204330184 | 0. 076791884  | 0. 111811397 | 0. 029298615  | 0. 544574123 | 0. 274930435  |
| 0. 114604966 | 0. 025408882  | 0. 599276712 | -0. 098478136 | 0. 041240341 | -0. 166651186 |
| 0. 03323657  | -0. 048281609 | 0. 317863946 | -0. 030600123 | 0. 526838916 | 0. 113462161  |
| 0. 676147091 | 0. 126578651  | 0. 008595735 | -0. 009544679 | 0. 843552837 | -0. 017466709 |
| 0. 681254706 | 0. 136245575  | 0. 00465141  | -0. 006410275 | 0. 894556611 | -0. 188946256 |
| 0. 415265648 | -0. 005174058 | 0. 914804877 | -0. 049130571 | 0. 309419168 | 0. 039027628  |
| 0. 52384241  | 0. 119533121  | 0. 013124414 | 0. 183289773  | 0. 000132297 | 0. 081628628  |
| 0. 591193726 | -0. 098329871 | 0. 041548182 | -0. 129742899 | 0. 007060652 | -0. 001304381 |
| 7. 76E-05    | 0. 043604888  | 0. 367053018 | -0. 104582865 | 0. 030134888 | -0. 228581196 |
| 0. 204465901 | 0. 023602774  | 0. 625492569 | -0. 182477399 | 0. 000141855 | -0. 207622797 |
| 0. 390152772 | 0. 087026426  | 0. 071421672 | 0. 235998871  | 7. 44E-07    | 0. 352548155  |
| 0. 213711991 | 0. 062799159  | 0. 193695714 | 0. 063173364  | 0. 191048448 | 0. 105706547  |
| 0. 526626441 | 0. 131477431  | 0. 006327682 | -0. 008449671 | 0. 861308144 | -0. 092847994 |
| 0. 001260874 | 0. 065213454  | 0. 1770815   | 0. 010451291  | 0. 828911642 | 0. 192770439  |
| 0. 232146768 | 0. 089742734  | 0. 062987309 | 0. 17551667   | 0. 000254759 | -0. 025814636 |
| 0. 267062282 | -0. 02565583  | 0. 595731112 | 0. 176390428  | 0. 000236989 | 0. 28218072   |



|             |              |             |              |             |              |
|-------------|--------------|-------------|--------------|-------------|--------------|
| 0.959556202 | 0.004133474  | 0.931892187 | -0.01080376  | 0.823235148 | -0.017142767 |
| 0.744096058 | 0.036796706  | 0.4466156   | -0.048664078 | 0.314041004 | -0.001093306 |
| 0.415743651 | 0.010772184  | 0.823743308 | 0.002229666  | 0.963229903 | 0.031009953  |
| 0.666124417 | 0.059521615  | 0.218036504 | 0.088863264  | 0.065623389 | 0.101344127  |
| 0.157846227 | 0.128018063  | 0.007863948 | 0.236021336  | 7.42E-07    | 0.37235507   |
| 0.257986442 | -0.051905048 | 0.2828599   | -0.075144133 | 0.119735067 | -0.002738173 |
| 0.014082443 | -0.089668102 | 0.063207565 | -0.029291208 | 0.544675895 | 0.031249637  |
| 0.103707509 | -0.001815879 | 0.970050224 | -0.251274354 | 1.29E-07    | -0.303717787 |
| 0.06935682  | 0.010878251  | 0.822036646 | -0.140654729 | 0.003469759 | -0.148149715 |
| 0.732321303 | 0.148756884  | 0.001981876 | 0.068068522  | 0.158827816 | -0.085626148 |
| 0.414569657 | 0.171157915  | 0.000363555 | -0.121011764 | 0.012029287 | -0.051125366 |
| 0.413485472 | 0.036082716  | 0.455490931 | -0.081580548 | 0.091107726 | -0.154588475 |
| 0.972084036 | -0.073770923 | 0.126667719 | 0.046543399  | 0.335619321 | 0.146499006  |
| 0.469032533 | 0.07749244   | 0.108570053 | 0.006241604  | 0.89731559  | -0.079926092 |
| 0.789313061 | 0.089502681  | 0.063698024 | 0.066012354  | 0.17182366  | -0.043104516 |
| 0.078767146 | 0.005017003  | 0.91738155  | -0.06814854  | 0.158337484 | -0.178555133 |
| 0.002930094 | -0.010005367 | 0.836105952 | -0.19784012  | 3.60E-05    | -0.036227451 |
| 0.165749215 | -0.011391727 | 0.813786611 | -0.114463483 | 0.017574397 | 0.207752299  |
| 0.041331403 | -0.175784815 | 0.000249178 | -0.179587534 | 0.000181369 | -0.064674045 |
| 0.097388875 | -0.025115362 | 0.603503332 | -0.166150353 | 0.000541354 | -0.337378349 |
| 0.6318513   | 0.137680047  | 0.004232178 | 0.237724981  | 6.14E-07    | 0.206237044  |
| 0.042461786 | -0.010471552 | 0.828585092 | -0.119967439 | 0.012793976 | -0.034013107 |
| 0.938364027 | 0.057661522  | 0.232788227 | -0.042172513 | 0.383017249 | -0.075949887 |
| 0.697705616 | 0.152787865  | 0.001484324 | 0.097166643  | 0.04403131  | 0.064340196  |
| 0.423258247 | 0.019650273  | 0.684500247 | -0.035194333 | 0.466670898 | -0.013956746 |
| 0.92681539  | 0.065206877  | 0.177125275 | -0.091263184 | 0.058636009 | -0.396075427 |
| 0.793975526 | -0.106759556 | 0.026849478 | -0.230095411 | 1.42E-06    | -0.141171028 |
| 0.114278274 | 0.08692859   | 0.071741888 | 0.037664014  | 0.435967566 | -0.010896626 |
| 0.983332841 | -0.056788894 | 0.239946613 | 0.2600416    | 4.47E-08    | 0.416432274  |
| 0.065773964 | 0.067495919  | 0.162370059 | 0.218580862  | 4.77E-06    | 0.295490658  |
| 0.607377351 | 0.022629282  | 0.639824086 | 0.065893589  | 0.172597846 | -0.022331212 |
| 0.652241503 | 0.0917589    | 0.057272291 | 0.204077313  | 2.00E-05    | 0.083337008  |
| 0.636199031 | 0.153211484  | 0.001439324 | 0.169075314  | 0.000429603 | 0.127133971  |
| 0.171896239 | -0.028118256 | 0.560910046 | -0.03200737  | 0.507999051 | 0.005815433  |
| 0.865302188 | -0.060395468 | 0.211342385 | -0.09595696  | 0.046744854 | 0.118904154  |
| 0.690809875 | 0.047008998  | 0.330802101 | 0.136234474  | 0.004654795 | 0.234462975  |
| 0.828755351 | 0.179389007  | 0.000184431 | 0.148287031  | 0.002048864 | 0.012832368  |
| 0.004220071 | -0.06661608  | 0.167928219 | -0.093840113 | 0.05183055  | 0.0070627    |
| 2.57E-05    | 0.050981486  | 0.29152443  | 0.059826519  | 0.215683761 | -0.181092086 |
| 0.044421961 | 0.167384701  | 0.000491254 | 0.285002501  | 1.77E-09    | 0.338836334  |
| 0.0439068   | 0.010972762  | 0.820516633 | 0.045490633  | 0.346676564 | 0.285666628  |
| 0.918178438 | 0.083702908  | 0.082972836 | 0.076579636  | 0.112808299 | 0.278983984  |
| 0.052753542 | 0.087026004  | 0.07142305  | 0.089166799  | 0.064703529 | 0.123846773  |
| 0.723222943 | -0.042655874 | 0.377583282 | -0.250090678 | 1.48E-07    | -0.211961296 |
| 0.322380339 | 0.001463396  | 0.975861848 | -0.071066668 | 0.141225996 | -0.183160838 |
| 0.002229008 | -0.021485348 | 0.656837224 | 0.072517745  | 0.133262479 | -0.079636804 |
| 0.101310217 | 0.020318647  | 0.674373426 | 0.324009593  | 5.74E-12    | 0.26334791   |
| 0.020900865 | 0.006253398  | 0.89712262  | -0.098114557 | 0.041998687 | -0.201941187 |
| 0.994798139 | 0.060470117  | 0.210777478 | 0.089557025  | 0.063536555 | 0.019468402  |
| 0.169564005 | 0.218626337  | 4.74E-06    | -0.020560152 | 0.670728576 | 0.144346212  |
| 0.995851756 | -0.141749031 | 0.00322223  | -0.019281013 | 0.690119547 | -0.014874677 |

|              |               |              |               |              |               |
|--------------|---------------|--------------|---------------|--------------|---------------|
| 0. 518715586 | 0. 000903623  | 0. 98509369  | -0. 054981079 | 0. 255265039 | -0. 100389973 |
| 0. 343678842 | 0. 05137463   | 0. 287814598 | -0. 213640259 | 7. 86E-06    | -0. 032817153 |
| 0. 269934698 | 0. 041280439  | 0. 393170544 | -0. 070798336 | 0. 14273773  | -0. 122571803 |
| 0. 001384159 | -0. 015288318 | 0. 751910689 | -0. 054764576 | 0. 257144002 | -0. 016719957 |
| 0. 404942592 | -0. 015949469 | 0. 741556019 | 0. 010069641  | 0. 835068133 | -0. 01133589  |
| 0. 095152804 | 0. 08407121   | 0. 081622773 | -0. 059327518 | 0. 219543771 | -0. 065030218 |
| 0. 220700858 | -0. 009659086 | 0. 84170215  | -0. 101692035 | 0. 035025777 | -0. 231478255 |
| 0. 364770866 | -0. 003246738 | 0. 946478216 | 0. 023219291  | 0. 631121687 | 0. 157594586  |
| 0. 562306985 | -0. 068890817 | 0. 153843299 | -0. 038557201 | 0. 425155842 | 0. 039829029  |
| 0. 603695273 | 0. 100484854  | 0. 037259667 | -0. 018194539 | 0. 7067512   | 0. 079629802  |
| 0. 413147002 | 0. 049822179  | 0. 302649814 | 0. 253064353  | 1. 04E-07    | 0. 273066587  |
| 0. 22800221  | 0. 097630489  | 0. 043026571 | -0. 019235747 | 0. 690809566 | 0. 047233739  |
| 0. 639221568 | 0. 013037837  | 0. 787481216 | -0. 293564056 | 5. 40E-10    | -0. 296661652 |
| 0. 144704641 | 0. 020358963  | 0. 673764439 | -0. 09449341  | 0. 050213978 | 0. 098683575  |
| 0. 324178298 | -0. 026440479 | 0. 584529151 | -0. 105458222 | 0. 028774433 | -0. 190292359 |
| 0. 559788951 | 0. 079623894  | 0. 099162199 | 0. 126266527  | 0. 008762201 | -0. 111894719 |
| 0. 241291484 | -0. 030325518 | 0. 530556269 | -0. 134753341 | 0. 005126948 | -0. 233833933 |
| 0. 818836972 | 0. 025834218  | 0. 593175811 | -0. 056859439 | 0. 239362233 | -0. 113043429 |
| 0. 978485792 | -0. 002179055 | 0. 964063971 | -0. 044891548 | 0. 353070772 | 0. 249226163  |
| 0. 770194999 | -0. 084784136 | 0. 079059926 | -0. 173309184 | 0. 000305355 | 0. 035367882  |
| 0. 791309626 | 0. 302310128  | 1. 54E-10    | 0. 007674572  | 0. 8739191   | -0. 04091223  |
| 0. 404643107 | -0. 140216615 | 0. 003573603 | -0. 231131482 | 1. 27E-06    | -0. 307724976 |
| 0. 893783266 | 0. 070585389  | 0. 143946223 | 0. 006572855  | 0. 891898481 | 0. 088193418  |
| 0. 451791194 | -0. 008046371 | 0. 867865698 | 0. 237882691  | 6. 03E-07    | 0. 124984308  |
| 0. 497457443 | 0. 082584959  | 0. 08718157  | 0. 324290893  | 5. 49E-12    | 0. 355370689  |
| 0. 3220087   | -0. 040386556 | 0. 403505731 | -0. 040597649 | 0. 40105054  | -0. 002062292 |
| 0. 013313183 | 0. 093635039  | 0. 052346863 | -0. 053922611 | 0. 264541965 | -0. 028736797 |
| 0. 00701945  | 0. 009527543  | 0. 843830102 | -0. 096836314 | 0. 04475881  | -0. 185726281 |
| 0. 812824453 | -0. 009190655 | 0. 849285047 | -0. 099749113 | 0. 038679561 | 0. 030725699  |
| 0. 013128711 | -0. 020558976 | 0. 670746301 | -0. 198882956 | 3. 27E-05    | -0. 213516347 |
| 0. 342534669 | 0. 023633844  | 0. 625037448 | 0. 027483621  | 0. 569789911 | 0. 124001265  |
| 0. 711116832 | 0. 053834582  | 0. 265323787 | 0. 020213739  | 0. 675959108 | 0. 030948408  |
| 0. 03217797  | 0. 039583887  | 0. 412923038 | -0. 061071296 | 0. 206267708 | -0. 236686306 |
| 0. 262559334 | -0. 019590105 | 0. 685414691 | 0. 10564631   | 0. 028489092 | 0. 150892091  |
| 0. 251463142 | 0. 040663616  | 0. 400285121 | 0. 040955807  | 0. 396905367 | 0. 057882329  |
| 0. 318830103 | -0. 056148444 | 0. 245297831 | 0. 027966107  | 0. 563032841 | 0. 031567478  |
| 0. 000296711 | 0. 017751537  | 0. 713573426 | 0. 022857381  | 0. 636453767 | 0. 010726207  |
| 0. 49752282  | 0. 102835222  | 0. 033016375 | 0. 018866729  | 0. 696444318 | 0. 115149396  |
| 0. 129927943 | 0. 062959565  | 0. 192557674 | 0. 30610984   | 8. 84E-11    | 0. 358997715  |
| 0. 579881396 | -0. 001122976 | 0. 981475791 | 0. 038626373  | 0. 424325098 | 0. 271463969  |
| 0. 221280277 | 0. 045442651  | 0. 34718596  | 0. 092603672  | 0. 055008922 | 0. 314966344  |
| 0. 328619043 | -0. 063542017 | 0. 188466498 | 0. 0315091    | 0. 514629248 | 0. 050293123  |
| 0. 058104857 | -0. 091027029 | 0. 059295062 | -0. 139498619 | 0. 003749891 | -0. 269675497 |
| 0. 08090892  | -0. 033577007 | 0. 487408375 | 0. 204503923  | 1. 92E-05    | 0. 386475438  |
| 0. 383343495 | -0. 000216974 | 0. 996420557 | -0. 077570067 | 0. 108215496 | -0. 180837869 |
| 0. 445782051 | 0. 424336293  | 3. 18E-20    | 0. 140678274  | 0. 003464256 | 0. 07287357   |
| 0. 034953432 | 0. 131599724  | 0. 006278676 | 0. 101351404  | 0. 035644267 | 0. 012487346  |
| 0. 560319738 | 0. 047907734  | 0. 321630244 | 0. 155117799  | 0. 001251916 | 0. 188984898  |
| 0. 360020974 | 0. 02150405   | 0. 65655761  | 0. 073963908  | 0. 125675042 | 0. 292605068  |
| 0. 916835613 | 0. 103744954  | 0. 031488374 | -0. 034005179 | 0. 48187054  | -0. 031933071 |
| 0. 620221487 | -0. 03782935  | 0. 433954397 | -0. 187991304 | 8. 78E-05    | -0. 06411357  |

|              |               |              |               |              |               |
|--------------|---------------|--------------|---------------|--------------|---------------|
| 0. 806800406 | -0. 004819676 | 0. 920620147 | 0. 057258163  | 0. 236078094 | 0. 155670589  |
| 0. 613359795 | 0. 057348062  | 0. 235342041 | -0. 054275201 | 0. 261426314 | -0. 114627261 |
| 0. 08149241  | 0. 099074994  | 0. 040020495 | 0. 075895145  | 0. 116070888 | 0. 213487357  |
| 0. 3808362   | 0. 114301015  | 0. 01773655  | -0. 054671568 | 0. 257954117 | 0. 125491592  |
| 0. 05767789  | 0. 004344039  | 0. 928431752 | -0. 004342926 | 0. 928450032 | -0. 170636784 |
| 0. 797798827 | 0. 041025591  | 0. 396100714 | -0. 055042813 | 0. 254731014 | 0. 21378846   |
| 0. 537614547 | -0. 095363198 | 0. 048127258 | -0. 202477059 | 2. 33E-05    | -0. 25052367  |
| 0. 551646122 | 0. 05124614   | 0. 289023567 | 0. 308853996  | 5. 89E-11    | 0. 212136019  |
| 0. 962517452 | 0. 040374555  | 0. 403645591 | 0. 069539602  | 0. 14999489  | 0. 014696563  |
| 0. 554455599 | 0. 06895169   | 0. 153479067 | -0. 013627348 | 0. 778117395 | 0. 028623226  |
| 0. 220278794 | -0. 083618789 | 0. 0832837   | 0. 289096076  | 1. 01E-09    | 0. 435057301  |
| 0. 355011908 | 0. 049427487  | 0. 306500883 | 0. 154268748  | 0. 001332424 | 0. 189088436  |
| 0. 31488539  | -0. 082490533 | 0. 087544779 | -0. 167952303 | 0. 000469693 | -0. 236561791 |
| 0. 786262926 | 0. 042432282  | 0. 380090997 | -0. 333580825 | 1. 23E-12    | -0. 144452111 |
| 0. 235088014 | -0. 102516433 | 0. 033566578 | 0. 224576711  | 2. 56E-06    | 0. 244904147  |
| 0. 031680169 | 0. 009153019  | 0. 849894912 | -0. 19769744  | 3. 65E-05    | -0. 040690674 |
| 0. 296652968 | 0. 109244429  | 0. 023480115 | 0. 096154326  | 0. 046292781 | 0. 399343135  |
| 0. 263376248 | 0. 05511197   | 0. 254133703 | -0. 134254198 | 0. 005295524 | -0. 129556876 |
| 0. 472217927 | 0. 101778761  | 0. 034869773 | 0. 140904705  | 0. 003411742 | 0. 115880362  |
| 0. 095785261 | -0. 059087862 | 0. 221415086 | 0. 017854986  | 0. 711978234 | 0. 041079721  |
| 0. 013890335 | -0. 034602958 | 0. 474196445 | -0. 204006283 | 2. 02E-05    | -0. 388073515 |
| 0. 035469096 | 0. 180246894  | 0. 000171537 | 0. 279627908  | 3. 64E-09    | 0. 290694412  |
| 0. 508629697 | -0. 13178853  | 0. 006203685 | -0. 18087891  | 0. 000162584 | -0. 106751924 |
| 0. 293046492 | -0. 033951482 | 0. 482563163 | -0. 069204099 | 0. 151975762 | 0. 097005288  |
| 0. 183067934 | 0. 037778593  | 0. 43457186  | 0. 186655037  | 9. 88E-05    | 0. 226258159  |
| 0. 362191322 | 0. 101380381  | 0. 035591295 | 0. 277907779  | 4. 58E-09    | 0. 377631727  |
| 0. 248323479 | -0. 072011606 | 0. 135999879 | -0. 049718545 | 0. 303657862 | 0. 079451077  |
| 0. 328318963 | 0. 130144099  | 0. 00688467  | 0. 044994408  | 0. 351967658 | 0. 143845246  |
| 0. 754070153 | 0. 030578967  | 0. 52712483  | -0. 219383554 | 4. 39E-06    | -0. 251223069 |
| 0. 001729801 | 0. 005335124  | 0. 91216334  | -0. 059748908 | 0. 216280893 | -0. 232643789 |
| 0. 423863111 | 0. 028210441  | 0. 559625771 | 0. 051918442  | 0. 282735538 | 0. 092744921  |
| 0. 073645964 | 0. 087242098  | 0. 070719909 | -0. 145665113 | 0. 002462194 | -0. 157910447 |
| 0. 036192794 | 0. 006655382  | 0. 890549645 | -0. 040105493 | 0. 40678862  | -0. 02696871  |
| 0. 351787539 | 0. 029677924  | 0. 539375022 | 0. 116437895  | 0. 015704936 | 0. 180814578  |
| 0. 699436031 | 0. 083703858  | 0. 08296933  | 0. 00704579   | 0. 884173118 | 0. 195418016  |
| 0. 574464303 | 0. 001099646  | 0. 981860554 | 0. 16055594   | 0. 000833662 | 0. 001338926  |
| 0. 245118999 | 0. 183945654  | 0. 000125025 | 0. 175302585  | 0. 000259299 | -0. 041274935 |
| 0. 988017392 | 0. 033755611  | 0. 485094218 | 0. 488007544  | 4. 11E-27    | 0. 314200771  |
| 0. 200628193 | 0. 030493919  | 0. 528275026 | 0. 49678564   | 3. 52E-28    | 0. 221237732  |
| 0. 038781882 | 0. 028335217  | 0. 557889708 | 0. 217544456  | 5. 30E-06    | 0. 174851645  |
| 0. 492357385 | -0. 004059303 | 0. 933111443 | 0. 017764478  | 0. 713373806 | -0. 061215391 |
| 0. 26593419  | 0. 002434531  | 0. 959854126 | -0. 080401062 | 0. 095897731 | -0. 112523629 |
| 0. 602255464 | -0. 014990004 | 0. 756597509 | 0. 112997151  | 0. 019085873 | 0. 182253836  |
| 0. 75193492  | 0. 049559307  | 0. 305211109 | -0. 299041029 | 2. 48E-10    | -0. 459885142 |
| 0. 113373699 | -0. 084605054 | 0. 079697479 | -0. 011747726 | 0. 808078754 | 0. 022218786  |
| 0. 207606126 | 0. 032608203  | 0. 500063918 | 0. 013939979  | 0. 773164469 | 0. 136857231  |
| 0. 000712481 | 0. 030368696  | 0. 529970876 | -0. 181624318 | 0. 000152587 | -0. 29364296  |
| 0. 129512059 | 0. 025193563  | 0. 602375945 | -0. 197662934 | 3. 66E-05    | -0. 247482015 |
| 0. 855778279 | -0. 026919043 | 0. 577745283 | 0. 024001403  | 0. 619664122 | 0. 093978279  |
| 0. 986017185 | 0. 017684324  | 0. 714610514 | 0. 056015615  | 0. 246418037 | 0. 079963295  |
| 0. 386402471 | -0. 103981403 | 0. 031101271 | -0. 014408316 | 0. 765761955 | 0. 175580633  |

|             |              |             |              |             |              |
|-------------|--------------|-------------|--------------|-------------|--------------|
| 0.41041551  | 0.025549974  | 0.597249795 | 0.145993106  | 0.002406624 | 0.122467866  |
| 0.050349558 | -0.021579381 | 0.655431848 | -0.047112116 | 0.329741264 | -0.061693404 |
| 0.724508518 | -0.083411299 | 0.084054512 | 0.052849083  | 0.274184781 | -0.034785253 |
| 0.343100294 | 0.041949074  | 0.385545209 | -0.108040382 | 0.025064109 | -0.217970012 |
| 0.119203963 | 0.013853861  | 0.774527897 | -0.277262055 | 4.98E-09    | -0.38313261  |
| 0.312401269 | -0.005714651 | 0.905942834 | 0.184897709  | 0.000115135 | 0.270571608  |
| 0.902876664 | 0.057303128  | 0.235709739 | 0.146710367  | 0.002289067 | 0.094468846  |
| 0.240397112 | -0.006510458 | 0.892918516 | -0.001518073 | 0.974960251 | 0.017966199  |
| 0.138057204 | 0.016404033  | 0.734463646 | -0.198478452 | 3.40E-05    | -0.284684904 |
| 0.877334486 | 0.055087332  | 0.254346385 | 0.013313348  | 0.783101088 | 0.043657223  |
| 0.06804548  | 0.085294375  | 0.077266051 | -0.100061478 | 0.038071233 | -0.092498065 |
| 0.149651267 | 0.002852974  | 0.952961309 | 0.313014252  | 3.15E-11    | 0.174528822  |
| 0.076700421 | -0.027639163 | 0.567607384 | 0.080453577  | 0.095680272 | 0.016056034  |
| 0.051421865 | 0.087522035  | 0.069817447 | -0.125925376 | 0.008947425 | -0.048623134 |
| 0.067454752 | -0.139897451 | 0.003651017 | -0.179956377 | 0.000175806 | -0.007876393 |
| 0.000204484 | 0.102234967  | 0.034058843 | 0.203374487  | 2.14E-05    | -0.017039146 |
| 0.726776275 | 0.130291687  | 0.006820926 | 0.298427702  | 2.71E-10    | 0.184268037  |
| 0.685909782 | 0.035554402  | 0.462121375 | -0.022015392 | 0.648931407 | -0.201599728 |
| 0.055729563 | -0.03877981  | 0.422485737 | -0.116899198 | 0.015294144 | -0.143454358 |
| 0.064793834 | 0.025660535  | 0.595663657 | -0.355735895 | 2.84E-14    | -0.416400541 |
| 0.262870579 | 0.079858631  | 0.098167009 | 0.139277569  | 0.00380573  | -0.002098983 |
| 0.9212003   | 0.05062529   | 0.294913151 | 0.206137692  | 1.64E-05    | 0.240629179  |
| 0.197239597 | 0.057846162  | 0.231293138 | 0.038309247  | 0.428141494 | -0.051585732 |
| 0.774948822 | -0.030426933 | 0.529181854 | -0.120046663 | 0.012734498 | -0.127761648 |
| 0.426385951 | -0.046569282 | 0.335350357 | 0.181711182  | 0.000151461 | 0.272693608  |
| 0.196506227 | 0.030550162  | 0.527514252 | -0.03193084  | 0.509014477 | -0.057616695 |
| 0.87449949  | 0.099762587  | 0.038653153 | 0.183137928  | 0.000134037 | 0.317566249  |
| 0.754857885 | 0.02146327   | 0.657167354 | -0.018298309 | 0.705156501 | -0.061241448 |
| 0.496597499 | 0.11517698   | 0.016877522 | -0.01418389  | 0.769306602 | 0.026278861  |
| 0.949760713 | 0.046418694  | 0.336917157 | -0.015557141 | 0.747695011 | -0.062679401 |
| 0.86025717  | -0.018829299 | 0.6970168   | -0.036250658 | 0.453394458 | 0.069409751  |
| 0.498545577 | 0.202278508  | 2.38E-05    | 0.072299822  | 0.13443584  | -0.069980053 |
| 0.126647652 | -0.004674563 | 0.923002627 | -0.191691669 | 6.32E-05    | -0.384890362 |
| 0.343542609 | -0.139222259 | 0.003819818 | -0.368922792 | 2.60E-15    | -0.330166655 |
| 0.040352278 | 0.056833502  | 0.239576976 | -0.148428021 | 0.002028549 | -0.300310811 |
| 0.060814461 | 0.051345428  | 0.288089068 | 0.073857149  | 0.12622344  | -0.133407665 |
| 0.182057192 | -0.035040144 | 0.46862664  | -0.270036376 | 1.28E-08    | -0.320206586 |
| 0.472836016 | -0.015185192 | 0.753529878 | -0.090966715 | 0.059464362 | 0.001146264  |
| 0.000527392 | 0.032980837  | 0.495175717 | 0.181033458  | 0.000160462 | 0.030356558  |
| 0.542217955 | 0.016935217  | 0.726204355 | -0.048864585 | 0.312048941 | 0.001650501  |
| 0.277409941 | 0.053367108  | 0.269502214 | 0.256412231  | 6.97E-08    | 0.475544229  |
| 0.388943704 | -0.024986913 | 0.605357147 | -0.197678066 | 3.66E-05    | -0.251002441 |
| 0.469832147 | -0.017254922 | 0.721248493 | -0.164286144 | 0.000626075 | -0.300360569 |
| 0.021480691 | 0.03658336   | 0.449257295 | 0.076964675  | 0.111004943 | 0.179924133  |
| 0.041753074 | -0.003256784 | 0.94631286  | -0.191334732 | 6.52E-05    | -0.294807213 |
| 0.972282211 | 0.15724884   | 0.001069157 | 0.006398036  | 0.894756766 | 0.048596209  |
| 0.016402584 | 0.041278797  | 0.393189385 | 0.04066367   | 0.400284495 | -0.168590639 |
| 0.319627713 | -0.046052167 | 0.340750294 | -0.133360936 | 0.005609701 | -0.208767088 |
| 0.28382497  | -0.104386069 | 0.030448214 | 0.015807212  | 0.743780132 | 0.038186045  |
| 0.156808067 | -0.102215171 | 0.034093695 | -0.109918776 | 0.022631375 | 0.014721403  |
| 0.078821252 | 0.066940096  | 0.165865001 | 0.186712933  | 9.83E-05    | 0.005433619  |

|             |              |             |              |             |              |
|-------------|--------------|-------------|--------------|-------------|--------------|
| 0.699096292 | 0.234953587  | 8.35E-07    | 0.083464352  | 0.083856879 | 0.091965455  |
| 0.514216769 | 0.062723312  | 0.194235538 | -0.043676311 | 0.36626796  | -0.029822803 |
| 0.016591353 | 0.007638321  | 0.874509722 | 0.002743107  | 0.954770788 | 0.126546859  |
| 0.845337104 | 0.033287699  | 0.491169482 | 0.012012361  | 0.803842344 | 0.04882911   |
| 0.588571126 | -0.023293087 | 0.63003677  | 0.078494531  | 0.104062877 | 0.137474031  |
| 0.475273272 | 0.06993955   | 0.147659237 | -0.051022361 | 0.291137235 | 0.005390675  |
| 0.364202064 | 0.010883673  | 0.821949426 | -0.016550108 | 0.732189245 | -0.03110811  |
| 0.332385799 | 0.117925394  | 0.014413967 | 0.083788588  | 0.082657166 | 0.237192778  |
| 0.189920953 | -0.087272473 | 0.070621524 | -0.138771883 | 0.003936311 | 0.17165019   |
| 0.759475889 | 0.005930703  | 0.902404244 | 0.103572924  | 0.031772593 | 0.206303974  |
| 0.094215185 | -0.017944025 | 0.71060627  | -0.124109247 | 0.009993346 | -0.155673227 |
| 0.611562066 | 0.016133926  | 0.738675334 | -0.059684186 | 0.21677977  | -0.055506455 |
| 0.673014066 | -0.066040634 | 0.1716397   | 0.078417002  | 0.104406209 | 0.098187575  |
| 0.231096567 | 0.121775223  | 0.011496087 | 0.085845715  | 0.075364975 | 0.037517765  |
| 0.041494078 | 0.080918598  | 0.093771797 | 0.088558165  | 0.066558788 | 0.349823522  |
| 0.020730083 | 0.024225253  | 0.616401534 | 0.077977073  | 0.10637143  | 0.311556213  |
| 0.9280371   | 0.159002332  | 0.000937579 | -0.018231047 | 0.706190007 | -0.011666889 |
| 0.062492559 | -0.020143649 | 0.677019316 | 0.054627953  | 0.258334619 | 0.203010507  |
| 0.808805396 | -0.010847023 | 0.822539042 | 0.499964733  | 1.42E-28    | 0.532814655  |
| 0.882331366 | -0.003449747 | 0.943137144 | -0.11959985  | 0.013073162 | 0.004439474  |
| 0.214526399 | 0.038546738  | 0.425281588 | 0.061417832  | 0.203700098 | -0.190387259 |
| 0.404589526 | -0.063291521 | 0.190218097 | 0.075227455  | 0.119324143 | 0.095475943  |
| 0.963906231 | -0.060070035 | 0.213817836 | -0.183555605 | 0.000129303 | -0.161281056 |
| 0.856480089 | -0.015077217 | 0.755226368 | 0.071150975  | 0.140753564 | 0.011569011  |
| 0.000229439 | 0.046673872  | 0.334264891 | -0.011374535 | 0.814062499 | -0.229323752 |
| 0.195831078 | 0.006238837  | 0.897360848 | -0.131274816 | 0.00640963  | -0.311895632 |
| 0.003581743 | -0.138304121 | 0.004060695 | 0.012919759  | 0.789360512 | 0.220078929  |
| 0.783462751 | 0.011350237  | 0.814452471 | -0.014981055 | 0.756738239 | -0.02777649  |
| 2.13E-06    | -0.009537554 | 0.843668123 | -0.06023047  | 0.212594867 | -0.257868235 |
| 0.24511108  | 0.002125847  | 0.96494088  | -0.06733501  | 0.163376089 | -0.036182654 |
| 0.60644671  | 0.038000147  | 0.431880374 | 0.17822215   | 0.000203431 | 0.16192049   |
| 0.708011912 | 0.199080267  | 3.21E-05    | 0.226176543  | 2.16E-06    | 0.117272811  |
| 0.00074154  | -0.068886549 | 0.153868857 | -0.172548561 | 0.000324859 | -0.194132202 |
| 0.032957882 | 0.023780326  | 0.622893624 | 0.175956172  | 0.000245671 | 0.296726071  |
| 0.073401592 | -0.019256589 | 0.690491827 | -0.026282025 | 0.58678343  | 0.032675628  |
| 0.727928264 | 0.078874946  | 0.102391153 | 0.322258326  | 7.57E-12    | 0.260552987  |
| 0.307593337 | -0.025453357 | 0.598637446 | 0.042887701  | 0.374993957 | 0.26392573   |
| 0.079109863 | 0.049752176  | 0.303330492 | -0.273022415 | 8.68E-09    | -0.330907448 |
| 0.541504542 | 0.076702405  | 0.112230822 | 0.075022794  | 0.120335462 | -0.111573122 |
| 0.345532529 | -0.043512562 | 0.368069386 | 0.208492912  | 1.31E-05    | 0.282712231  |
| 0.622676667 | 0.185454501  | 0.000109697 | 0.092656871  | 0.054868913 | -0.064298963 |
| 0.968883755 | 0.054107911  | 0.262901399 | -0.007067775 | 0.883814265 | 0.016525667  |
| 0.943055678 | 0.118914455  | 0.01360809  | 0.25193757   | 1.19E-07    | 0.162450745  |
| 0.997273583 | 0.204982394  | 1.84E-05    | 0.189438844  | 7.73E-05    | 0.224295808  |
| 0.995313235 | -0.031364539 | 0.516561185 | 0.077649617  | 0.107853099 | 0.131381479  |
| 0.329438664 | 0.040121957  | 0.406595881 | -0.035898656 | 0.457794845 | 0.046501362  |
| 0.925362428 | -0.031912952 | 0.509251982 | -0.102869974 | 0.032956864 | 0.025959041  |
| 0.474264247 | 0.05116156   | 0.289821237 | 0.134468056  | 0.005222696 | 0.182056753  |
| 0.330656866 | -0.008995766 | 0.852444024 | -0.0356078   | 0.461448795 | 0.09201414   |
| 0.19641557  | -0.054634651 | 0.258276154 | -0.081649156 | 0.09083511  | -0.100654053 |
| 0.374307844 | -0.027967437 | 0.56301426  | -0.302451461 | 1.51E-10    | -0.090144745 |

|             |              |             |              |             |              |
|-------------|--------------|-------------|--------------|-------------|--------------|
| 0.940636996 | -0.103432592 | 0.032006064 | 0.05369901   | 0.266530971 | 0.146135375  |
| 0.184732806 | 0.026644648  | 0.581630443 | 0.100436977  | 0.0373507   | 0.00269385   |
| 0.016946464 | 0.003967509  | 0.934620584 | 0.149919583  | 0.001824628 | 0.161188344  |
| 0.155567331 | 0.070111874  | 0.146661463 | -0.055341174 | 0.252160995 | -0.088272814 |
| 0.442286415 | 0.094887288  | 0.04925984  | -0.13644049  | 0.004592327 | -0.312559994 |
| 0.004103938 | -0.017899601 | 0.71129066  | 0.130685093  | 0.006653588 | 0.024094631  |
| 0.069283521 | 0.018811136  | 0.697294657 | -0.000329993 | 0.994556114 | 0.012198598  |
| 0.556116515 | 0.00822374   | 0.864980583 | -0.039806927 | 0.410293297 | 0.006292717  |
| 0.952154057 | 0.105671585  | 0.028450933 | 0.067949393  | 0.159559932 | 0.122095756  |
| 0.146093375 | 0.019158722  | 0.691984314 | 0.020028459  | 0.67876311  | -0.192925653 |
| 0.994339202 | 0.03634224   | 0.452253509 | 0.147404936  | 0.002180248 | 0.059459719  |
| 0.823337572 | 0.121413923  | 0.011745757 | -0.061987885 | 0.199526938 | 0.086012231  |
| 0.028106327 | 0.067863556  | 0.160089019 | -0.034310981 | 0.477936371 | -0.054340154 |
| 0.051995307 | 0.068413439  | 0.156722397 | 0.171033034  | 0.000367232 | 0.206512846  |
| 0.635001474 | 0.025187971  | 0.602456526 | 0.051424703  | 0.287344379 | 0.043887651  |
| 0.371367195 | 0.181288291  | 0.00015702  | 0.074881239  | 0.121038849 | -0.147165778 |
| 0.717183263 | 0.093557846  | 0.052542319 | 0.240656467  | 4.41E-07    | 0.433801103  |
| 0.178824824 | 0.021274067  | 0.659999325 | -0.011416413 | 0.813390483 | 0.008171123  |
| 0.604964365 | 0.084332689  | 0.080675108 | 0.238389795  | 5.70E-07    | 0.085708812  |
| 0.308218056 | -0.036451439 | 0.450895188 | -0.057373531 | 0.235133805 | -0.088303782 |
| 0.11884056  | -0.021345064 | 0.658936068 | 0.046903609  | 0.331888562 | -0.089051742 |
| 0.823599047 | -0.007972589 | 0.869066369 | -0.028435016 | 0.556503029 | -0.076130169 |
| 0.39543786  | 0.130869422  | 0.006576455 | 0.133099644  | 0.005704719 | 0.165654923  |
| 0.03750036  | 0.114776322  | 0.017265811 | -0.17902457  | 0.000190179 | -0.24623356  |
| 0.533635515 | -0.006014377 | 0.901034307 | 0.126709475  | 0.008526804 | 0.133227465  |
| 0.858237095 | 0.016424463  | 0.734145412 | 8.28E-06     | 0.999863344 | 0.074624946  |
| 0.07055711  | -0.008094361 | 0.867084909 | 0.022442671  | 0.642586908 | 0.039888008  |
| 0.005322497 | 0.061822646  | 0.200730137 | 0.053003326  | 0.272784789 | 0.168528655  |
| 0.3958336   | 0.103404072  | 0.032053692 | 0.071582158  | 0.138356254 | 0.098059184  |
| 0.437505868 | 0.005900146  | 0.902904596 | 0.28913164   | 1.00E-09    | 0.316469931  |
| 0.593364511 | -0.030521433 | 0.527902781 | 0.049640511  | 0.304418373 | 0.107781363  |
| 0.508462347 | 0.059230536  | 0.22029967  | -0.035418219 | 0.463839164 | 0.021543563  |
| 0.117531122 | 0.173888217  | 0.000291246 | -0.100006912 | 0.038176911 | -0.069389713 |
| 0.428813263 | -0.006320682 | 0.896021934 | 0.146838595  | 0.002268611 | 0.1182881    |
| 0.351099831 | 0.020545875  | 0.670943834 | -0.269905098 | 1.30E-08    | -0.296754232 |
| 0.266177849 | 0.037166941  | 0.442052247 | 0.087759447  | 0.069059481 | 0.112894836  |
| 0.378921459 | 0.159484414  | 0.00090412  | 0.076198085  | 0.11461794  | 0.138775213  |
| 0.964160136 | 0.020629495  | 0.669683458 | 0.028358309  | 0.557568698 | 0.195722885  |
| 0.946217043 | -0.000123656 | 0.997960035 | -0.034666546 | 0.473384077 | -0.015900298 |
| 0.926595141 | -0.005300601 | 0.912729448 | -0.00151278  | 0.975047526 | 0.033380453  |
| 0.495139462 | 0.186136997  | 0.00010336  | 0.269456834  | 1.37E-08    | 0.162221159  |
| 0.579669697 | -0.04500742  | 0.351828271 | -0.037472165 | 0.438310271 | 0.220539104  |
| 0.134196518 | 0.105665736  | 0.028459759 | -0.052688967 | 0.275643258 | -0.060121426 |
| 0.723318476 | 0.030903796  | 0.522743545 | -0.127357063 | 0.008192794 | -0.160278676 |
| 0.024828042 | -0.058522518 | 0.225874538 | -0.04933473  | 0.307410601 | 0.013695612  |
| 0.078347125 | 0.086561342  | 0.072954352 | 0.029751379  | 0.53837107  | -0.024067427 |
| 0.529150466 | -0.011204665 | 0.816789817 | -0.075774217 | 0.116654893 | 0.048957136  |
| 0.73103273  | -0.04706969  | 0.330177459 | -0.15675109  | 0.001109496 | -0.309927427 |
| 0.159073526 | -0.030274103 | 0.531253738 | -0.128560885 | 0.007602761 | -0.044350433 |
| 0.67748726  | -0.001025597 | 0.983081863 | -0.082458938 | 0.087666579 | -0.020777012 |
| 0.305730579 | 0.051695229  | 0.284812918 | -0.04785543  | 0.322159447 | -0.10642754  |

|              |               |              |               |              |               |
|--------------|---------------|--------------|---------------|--------------|---------------|
| 0. 241147473 | 0. 072473343  | 0. 133500908 | 0. 041002222  | 0. 39637006  | 0. 007701474  |
| 0. 316615112 | 0. 05077294   | 0. 293505285 | -0. 236626953 | 6. 93E-07    | -0. 205170953 |
| 0. 677744884 | 0. 036996799  | 0. 444146041 | 0. 388847285  | 5. 69E-17    | 0. 351224828  |
| 0. 679747842 | 0. 045461173  | 0. 346989269 | 0. 204850241  | 1. 86E-05    | 0. 228598573  |
| 0. 109147659 | 0. 00460344   | 0. 924170582 | -0. 070316467 | 0. 145483531 | -0. 312022416 |
| 0. 94947569  | 0. 01819572   | 0. 706733042 | -0. 038938769 | 0. 420585089 | -0. 035262254 |
| 0. 630373548 | -0. 019330346 | 0. 689367821 | 0. 242904256  | 3. 42E-07    | 0. 287513126  |
| 0. 531909357 | 0. 109518946  | 0. 02313134  | 0. 252813482  | 1. 07E-07    | 0. 162651811  |
| 0. 087908091 | 0. 015002874  | 0. 75639512  | -0. 327066796 | 3. 53E-12    | -0. 175062146 |
| 0. 386080435 | 0. 252875359  | 1. 07E-07    | 0. 009066321  | 0. 851300114 | 0. 046497574  |
| 0. 207514414 | 0. 037753323  | 0. 434879456 | -0. 100273705 | 0. 037662564 | -0. 146433527 |
| 0. 001774227 | 0. 020749367  | 0. 667878274 | 0. 046134198  | 0. 339890006 | -0. 119249818 |
| 0. 215692704 | -0. 06252725  | 0. 195636068 | -0. 071129653 | 0. 140872932 | -0. 142397512 |
| 0. 045914094 | -0. 012372937 | 0. 798079303 | 0. 201181466  | 2. 64E-05    | 0. 370076417  |
| 0. 618503902 | 0. 058448635  | 0. 226462017 | 0. 08997114   | 0. 062317151 | 0. 195792662  |
| 0. 713167167 | -0. 029505106 | 0. 541740722 | -0. 286766063 | 1. 39E-09    | -0. 314545249 |
| 0. 001135684 | -0. 028407365 | 0. 556887072 | -0. 015864162 | 0. 742889485 | -0. 298451064 |
| 0. 176954005 | -0. 028764774 | 0. 55193313  | 0. 05035763   | 0. 297476814 | -0. 023332474 |
| 0. 946833113 | 0. 026631153  | 0. 581821834 | 0. 034766686  | 0. 472106292 | -0. 000784698 |
| 0. 121428462 | -0. 00083719  | 0. 986189457 | 0. 192147108  | 6. 06E-05    | 0. 213631654  |
| 0. 876746629 | -0. 010296462 | 0. 831407993 | 0. 065839552  | 0. 172950947 | 0. 151316118  |
| 0. 271821234 | -0. 015591818 | 0. 747151743 | 0. 048489793  | 0. 315779304 | 0. 009050092  |
| 0. 359982489 | 0. 009768409  | 0. 839934527 | -0. 042400152 | 0. 380452198 | -0. 136873367 |
| 0. 293489333 | -0. 035872932 | 0. 458117359 | -0. 095255646 | 0. 048381287 | -0. 16748109  |
| 0. 331537375 | 0. 05266499   | 0. 275862114 | 0. 013579715  | 0. 778872834 | 0. 260209952  |
| 0. 497634644 | 0. 404462563  | 2. 35E-18    | 0. 101681803  | 0. 035044221 | 0. 148769394  |
| 0. 366936114 | 0. 048769317  | 0. 312994398 | -0. 131731766 | 0. 006226146 | 0. 011969351  |
| 0. 585849049 | 0. 048038543  | 0. 320309232 | -0. 193143426 | 5. 54E-05    | -0. 088526024 |
| 0. 186100999 | -0. 002229974 | 0. 963224827 | -0. 067351105 | 0. 163275248 | -0. 199963452 |
| 0. 18645774  | -0. 061934713 | 0. 199913545 | 0. 013880148  | 0. 774111644 | 0. 041883187  |
| 0. 641583499 | 0. 092822099  | 0. 054435946 | 0. 252526642  | 1. 11E-07    | 0. 176973961  |
| 0. 624015586 | -0. 021753739 | 0. 652829218 | 0. 10118804   | 0. 035944169 | 0. 017131999  |
| 0. 411924539 | 0. 010898167  | 0. 821716286 | -0. 011011889 | 0. 819887556 | 0. 14367346   |
| 0. 968238496 | 0. 012460115  | 0. 796687578 | 0. 447479941  | 1. 46E-22    | 0. 284163199  |
| 0. 191827846 | -0. 077031973 | 0. 110692085 | -0. 014620579 | 0. 762413906 | -0. 022596327 |
| 0. 914198333 | 0. 030947228  | 0. 522159157 | -0. 055396155 | 0. 251689373 | -0. 071246348 |
| 0. 522057096 | -0. 024226697 | 0. 616380503 | -0. 02203871  | 0. 648584509 | 0. 009787185  |
| 0. 259283454 | -0. 135970803 | 0. 004735864 | -0. 301615965 | 1. 71E-10    | -0. 292930541 |
| 0. 635389466 | -0. 041457967 | 0. 391137128 | -0. 275863011 | 5. 99E-09    | -0. 302275998 |
| 0. 481259519 | -0. 055557338 | 0. 25031029  | 0. 017466734  | 0. 717971505 | -0. 012073653 |
| 0. 496448166 | 0. 221890011  | 3. 39E-06    | 0. 266301511  | 2. 05E-08    | 0. 128249953  |
| 0. 103178855 | 0. 045262781  | 0. 349099781 | 0. 014197529  | 0. 769091058 | 0. 242353656  |
| 0. 02314788  | -0. 062895588 | 0. 193010983 | -0. 134862258 | 0. 005090812 | -0. 221754414 |
| 0. 718870925 | 0. 046799726  | 0. 33296175  | 0. 014379054  | 0. 766223861 | 0. 131881131  |
| 0. 87032042  | -0. 020635375 | 0. 669594855 | 0. 106033429  | 0. 027909444 | 0. 205470599  |
| 0. 054445894 | 0. 069990055  | 0. 147366273 | 0. 346739678  | 1. 36E-13    | 0. 470908977  |
| 0. 740671877 | 0. 084615321  | 0. 079660815 | 0. 184925077  | 0. 000114862 | -0. 012055021 |
| 0. 128291254 | 0. 045469762  | 0. 346898081 | -0. 187343214 | 9. 30E-05    | -0. 245151769 |
| 0. 581636629 | 0. 017283249  | 0. 720809942 | -0. 102458048 | 0. 033668188 | 0. 121896141  |
| 0. 598291945 | -0. 060764805 | 0. 208558062 | -0. 178764078 | 0. 00019439  | -0. 173152762 |
| 0. 228493988 | -0. 125674873 | 0. 009085644 | 0. 142085201  | 0. 003149474 | 0. 365740755  |

|              |               |              |               |              |               |
|--------------|---------------|--------------|---------------|--------------|---------------|
| 0. 204222986 | 0. 166309566  | 0. 000534636 | -0. 056028282 | 0. 246311055 | -0. 232509069 |
| 0. 367059129 | 0. 004810337  | 0. 920773447 | -0. 0541248   | 0. 262752221 | -0. 10442363  |
| 0. 028578406 | 0. 05141365   | 0. 287448135 | 0. 006493311  | 0. 893198859 | 0. 19293175   |
| 0. 307085185 | 0. 057375825  | 0. 235115055 | -0. 140889185 | 0. 003415318 | -0. 160151078 |
| 0. 999314725 | 0. 160853922  | 0. 00081499  | 0. 228775518  | 1. 64E-06    | 0. 307289     |
| 0. 106401892 | 0. 075615233  | 0. 117426176 | 0. 054061391  | 0. 263312609 | 0. 125753733  |
| 0. 10761877  | 0. 030868085  | 0. 523224305 | -0. 253166767 | 1. 03E-07    | -0. 383939605 |
| 0. 148052602 | 0. 054397527  | 0. 26035131  | 0. 373895159  | 1. 03E-15    | 0. 148700957  |
| 0. 001385136 | -0. 024116073 | 0. 617991871 | 0. 167125548  | 0. 000501401 | 0. 317334631  |
| 0. 044105916 | 0. 1207642    | 0. 012206815 | -0. 14799523  | 0. 002091503 | -0. 166699589 |
| 0. 263857488 | 0. 105694585  | 0. 028416248 | 0. 062429441  | 0. 196337494 | -0. 119423178 |
| 0. 023406844 | -0. 22572119  | 2. 27E-06    | -0. 061916487 | 0. 200046186 | 0. 160616585  |
| 0. 558783097 | 0. 13436356   | 0. 005258168 | 0. 039697884  | 0. 411577714 | 0. 016100355  |
| 0. 936880711 | 0. 004423767  | 0. 92712183  | -0. 004506271 | 0. 92576652  | 0. 024123074  |
| 0. 823069757 | 0. 092261969  | 0. 055915324 | -0. 000667379 | 0. 988990518 | 0. 020863545  |
| 0. 736215285 | 0. 194098952  | 5. 08E-05    | 0. 253359255  | 1. 01E-07    | 0. 44327747   |
| 0. 495992452 | 0. 439660457  | 9. 44E-22    | -0. 023506689 | 0. 626900976 | -0. 249211329 |
| 0. 963353173 | 0. 067679228  | 0. 161229664 | 0. 004469253  | 0. 926374604 | 0. 080363432  |
| 0. 547730435 | -0. 026025488 | 0. 590441573 | -0. 027293813 | 0. 572458652 | -0. 091992368 |
| 0. 1238482   | 0. 072077619  | 0. 135640419 | 0. 024601786  | 0. 610930614 | -0. 064615892 |
| 0. 637443368 | -0. 20742087  | 1. 45E-05    | -0. 125036227 | 0. 009446658 | -0. 099714395 |
| 0. 449429825 | -0. 008720912 | 0. 856903159 | -0. 243185136 | 3. 31E-07    | -0. 30764832  |
| 0. 12062984  | -0. 036064791 | 0. 455715019 | -0. 101922791 | 0. 034611995 | 0. 091946135  |
| 0. 221111113 | -0. 067019548 | 0. 165361992 | 0. 010651537  | 0. 82568558  | 0. 21579659   |
| 0. 636157704 | 0. 12366014   | 0. 010268168 | 0. 15456781   | 0. 001303539 | 0. 126873781  |
| 0. 256485754 | 0. 036594452  | 0. 449119735 | 0. 094402232  | 0. 050437037 | 0. 183633241  |
| 0. 359144463 | 0. 04856267   | 0. 31505167  | 0. 029985593  | 0. 535176163 | 0. 069047292  |
| 0. 001292005 | -0. 019445103 | 0. 687620353 | 0. 044207053  | 0. 36046694  | -0. 043839534 |
| 0. 774287392 | -0. 01664423  | 0. 730725001 | -0. 03429268  | 0. 478171313 | -0. 215116101 |
| 0. 934168909 | -0. 091761665 | 0. 057264759 | 0. 097606988  | 0. 043077007 | 0. 279012235  |
| 0. 207814506 | 0. 222290155  | 3. 25E-06    | -0. 006775311 | 0. 888590077 | 0. 001525627  |
| 0. 754411334 | -0. 027624554 | 0. 567812204 | -0. 010230894 | 0. 832465676 | 0. 109678219  |
| 0. 010774554 | 0. 004118893  | 0. 932131863 | -0. 090223595 | 0. 06158328  | -0. 116790534 |
| 0. 494960955 | 0. 188708853  | 8. 24E-05    | -0. 027337548 | 0. 571843198 | -0. 039070192 |
| 0. 230320523 | 0. 033332825  | 0. 490581802 | 0. 101181464  | 0. 035956286 | -0. 221847954 |
| 0. 012472287 | 0. 044281117  | 0. 359662017 | 0. 090857955  | 0. 05977066  | -0. 031336514 |
| 0. 925504621 | -0. 075679535 | 0. 117113747 | 0. 08015112   | 0. 096938117 | 0. 09578328   |
| 0. 873902222 | -0. 134936668 | 0. 005066256 | -0. 091439313 | 0. 05814843  | -0. 036261856 |
| 0. 759358284 | 0. 029016112  | 0. 548462372 | -0. 007351779 | 0. 879180598 | 0. 081021189  |
| 0. 210819289 | -0. 010471206 | 0. 828590669 | -0. 039225979 | 0. 417163679 | 0. 112235113  |
| 0. 372682729 | 0. 085581649  | 0. 076270701 | 0. 039967737  | 0. 40840344  | -0. 345684328 |
| 0. 195842576 | 0. 026620079  | 0. 581978915 | 0. 216870964  | 5. 67E-06    | 0. 242741481  |
| 0. 266122426 | 0. 041385969  | 0. 391961032 | -0. 04868606  | 0. 313822201 | 0. 214672378  |
| 0. 09088531  | 0. 019132528  | 0. 692383986 | -0. 071067338 | 0. 141222232 | 0. 08998165   |
| 0. 827213427 | 0. 021174426  | 0. 661492689 | 0. 138709101  | 0. 003952802 | 0. 175807445  |
| 0. 02076334  | 0. 103427285  | 0. 032014923 | -0. 074724903 | 0. 121819408 | -0. 218841727 |
| 0. 121947445 | 0. 120371744  | 0. 012492988 | 0. 051977173  | 0. 282190643 | 0. 038097722  |
| 0. 02890857  | 0. 117048058  | 0. 015163611 | -0. 00664846  | 0. 890662777 | 0. 077443112  |
| 0. 000151679 | 0. 165269883  | 0. 000579946 | -0. 037312764 | 0. 440262221 | -0. 147280103 |
| 0. 680051792 | 0. 035813509  | 0. 458862847 | 0. 103390679  | 0. 032076079 | 0. 044923397  |
| 0. 730753377 | 0. 00673      | 0. 889330365 | 0. 016209721  | 0. 737492689 | 0. 037278454  |



|              |               |              |               |              |               |
|--------------|---------------|--------------|---------------|--------------|---------------|
| 0. 518801468 | -0. 26587147  | 2. 17E-08    | 0. 080401273  | 0. 095896855 | 0. 370843135  |
| 0. 001397709 | 0. 019609051  | 0. 685126706 | -0. 091688029 | 0. 05746563  | -0. 279041637 |
| 0. 87470685  | 0. 060390708  | 0. 211378441 | 0. 165139639  | 0. 000585867 | 0. 069540979  |
| 0. 075142121 | -0. 064821343 | 0. 179705406 | -0. 105749345 | 0. 028333813 | -0. 019108806 |
| 0. 688343076 | 0. 129418856  | 0. 007205716 | -0. 1263411   | 0. 00872217  | -0. 397963981 |
| 0. 979973592 | -0. 12243102  | 0. 01105488  | -0. 156281711 | 0. 001148815 | -0. 166463975 |
| 0. 134153819 | 0. 000840703  | 0. 986131515 | -0. 002176009 | 0. 964114167 | -0. 083872128 |
| 0. 143274758 | 0. 051516321  | 0. 286485377 | -0. 013454157 | 0. 780865116 | 0. 355099823  |
| 0. 036343199 | -0. 056848351 | 0. 239454017 | 0. 126406785  | 0. 008687045 | 0. 297888912  |
| 0. 941432763 | 0. 051560014  | 0. 286076316 | 0. 185918634  | 0. 000105349 | 0. 143727974  |
| 0. 527008909 | 0. 057857542  | 0. 231201208 | 0. 156753867  | 0. 001109267 | 0. 231297536  |
| 0. 316965714 | -0. 220714974 | 3. 83E-06    | -0. 12618825  | 0. 008804396 | -0. 084824831 |
| 0. 07913628  | -0. 20754412  | 1. 43E-05    | -0. 195801967 | 4. 35E-05    | -0. 129334264 |
| 0. 666201371 | 0. 045415035  | 0. 347479363 | -0. 204542085 | 1. 92E-05    | -0. 146088836 |
| 0. 598050805 | -0. 022408161 | 0. 64309837  | 0. 134713469  | 0. 005140234 | 0. 047696935  |
| 0. 513860656 | 0. 239959735  | 4. 77E-07    | -0. 105443384 | 0. 028797047 | -0. 310713405 |
| 0. 556544001 | 0. 050059015  | 0. 300354426 | 0. 020486398  | 0. 671840878 | -0. 038708692 |
| 0. 193001766 | -0. 165682093 | 0. 000561571 | -0. 116750831 | 0. 015425225 | -0. 100844765 |
| 0. 676918548 | -0. 050128025 | 0. 299687776 | -0. 071939489 | 0. 13639341  | -0. 112705764 |
| 0. 067092402 | 0. 065484797  | 0. 175282467 | -0. 021906469 | 0. 650552862 | -0. 079286799 |
| 0. 335029952 | 0. 079241497  | 0. 100800567 | 0. 073767674  | 0. 12668448  | 0. 009258504  |
| 0. 665013464 | 0. 07301159   | 0. 130632722 | -0. 072884817 | 0. 131303941 | 0. 005924547  |
| 0. 794435859 | 0. 107824596  | 0. 025357524 | -0. 016942846 | 0. 726085961 | -0. 014517941 |
| 0. 487961244 | 0. 054028495  | 0. 263603651 | 0. 054919575  | 0. 255797837 | 0. 058881711  |
| 0. 800629786 | 0. 078441229  | 0. 104298826 | 0. 059231999  | 0. 220288251 | 0. 094923755  |
| 0. 647152611 | 0. 036661567  | 0. 448287901 | 0. 021145043  | 0. 661933314 | -0. 056044894 |
| 0. 147611033 | 0. 021458013  | 0. 657245973 | -0. 145046411 | 0. 002570214 | -0. 329729109 |
| 0. 370210034 | 0. 052762609  | 0. 274971807 | -0. 097612618 | 0. 04306492  | -0. 028915233 |
| 0. 8181723   | -0. 003710807 | 0. 938842143 | 0. 340985958  | 3. 61E-13    | 0. 320569541  |
| 0. 737626781 | -0. 049535557 | 0. 305443219 | 0. 125933517  | 0. 008942965 | 0. 24629809   |
| 0. 875688768 | -0. 015948431 | 0. 74157223  | -0. 011950588 | 0. 804830727 | -0. 096974357 |
| 0. 51139919  | 0. 152365497  | 0. 001530474 | 0. 408892063  | 9. 25E-19    | 0. 298249929  |
| 0. 013454716 | 0. 092421694  | 0. 055490104 | 0. 173623934  | 0. 000297608 | 0. 197949464  |
| 0. 400440873 | 0. 093847718  | 0. 051811486 | 0. 022544041  | 0. 64108548  | 0. 164851536  |
| 0. 707315235 | -0. 033968065 | 0. 482349199 | 0. 135886475  | 0. 004762059 | 0. 077544113  |
| 0. 048400437 | -0. 010557169 | 0. 827205533 | -0. 098660279 | 0. 040864796 | -0. 205093171 |
| 0. 959753803 | 0. 09699953   | 0. 0443981   | -0. 204113328 | 2. 00E-05    | -0. 143026524 |
| 0. 003073007 | -0. 00261499  | 0. 956881118 | 0. 13867254   | 0. 003962435 | -0. 050378219 |
| 0. 91116104  | 0. 032394686  | 0. 502876291 | -0. 129453493 | 0. 007190084 | -0. 278201828 |
| 0. 211769082 | 0. 092555095  | 0. 05513703  | 0. 004338637  | 0. 928520511 | -0. 036711752 |
| 0. 790672733 | 0. 089076712  | 0. 064975423 | 0. 074623544  | 0. 122327565 | 0. 059370637  |
| 0. 167007219 | 0. 006797944  | 0. 888220344 | -0. 058092742 | 0. 229307111 | -0. 082482209 |
| 0. 471677441 | 0. 018503849  | 0. 70200167  | 0. 182826605  | 0. 00013767  | 0. 34621531   |
| 0. 000558939 | -0. 011515617 | 0. 811799101 | -0. 129807762 | 0. 00703193  | -0. 193678627 |
| 0. 066612394 | -0. 093464678 | 0. 052779033 | -0. 103518165 | 0. 031863522 | -0. 119462871 |
| 0. 870733332 | -0. 146906327 | 0. 002257874 | -0. 080924589 | 0. 093747408 | 0. 115711921  |
| 0. 976870351 | 0. 28097301   | 3. 04E-09    | 0. 112802428  | 0. 019294875 | 0. 161009611  |
| 0. 124446532 | -0. 078453345 | 0. 104245153 | -0. 132109273 | 0. 00607813  | -0. 136450578 |
| 0. 726950999 | 0. 036309732  | 0. 452658307 | 0. 1211954    | 0. 011899078 | 0. 129251407  |
| 0. 659713526 | -0. 041661306 | 0. 388815915 | 0. 269679123  | 1. 34E-08    | 0. 25136227   |
| 0. 457900464 | -0. 052918707 | 0. 273552231 | 0. 015904071  | 0. 742265562 | 0. 004262408  |

|              |               |              |               |              |               |
|--------------|---------------|--------------|---------------|--------------|---------------|
| 0. 21583471  | 0. 049459754  | 0. 306184839 | -0. 102534116 | 0. 033535856 | -0. 058536732 |
| 0. 141379499 | 0. 041790072  | 0. 387350314 | 0. 032049637  | 0. 507438691 | 0. 004710422  |
| 0. 483723233 | 0. 165821211  | 0. 000555493 | -0. 037053025 | 0. 443453486 | -0. 129999763 |
| 0. 033600042 | -0. 027824209 | 0. 565016075 | -0. 012171799 | 0. 801292727 | 0. 008809029  |
| 0. 029078459 | -0. 091566096 | 0. 057799538 | -0. 164864931 | 0. 000598539 | 0. 060880307  |
| 0. 733594287 | 0. 011599044  | 0. 810461409 | -0. 027070581 | 0. 575604869 | -0. 013196944 |
| 0. 465865292 | 0. 084461629  | 0. 080211088 | 0. 12971938   | 0. 007071092 | 0. 102656374  |
| 0. 001277288 | 0. 055990332  | 0. 246631665 | -0. 057384625 | 0. 235043142 | -0. 158466235 |
| 0. 357961298 | 0. 078814124  | 0. 102656994 | -0. 015953362 | 0. 741495181 | 0. 182164646  |
| 0. 352257792 | 0. 0149478    | 0. 757261294 | 0. 248271325  | 1. 84E-07    | 0. 158957624  |
| 0. 767772775 | 0. 104528808  | 0. 030220677 | 0. 121041302  | 0. 012008258 | 0. 200548329  |
| 0. 090472594 | 0. 004775372  | 0. 921347459 | -0. 201887284 | 2. 47E-05    | -0. 336780577 |
| 0. 267726942 | -0. 047967994 | 0. 321021245 | 0. 076217825  | 0. 114523762 | 0. 171422922  |
| 0. 047277891 | -0. 054610532 | 0. 258486706 | 0. 004336519  | 0. 928555304 | 0. 096432553  |
| 0. 057596454 | 0. 039932361  | 0. 408818729 | 0. 09794514   | 0. 042356052 | 0. 217176421  |
| 0. 684525398 | -0. 037737498 | 0. 435072149 | 0. 020934646  | 0. 665091874 | 0. 008479285  |
| 0. 539212209 | 0. 048142469  | 0. 319262226 | 0. 103784761  | 0. 031422916 | 0. 03767338   |
| 0. 106462808 | 0. 062672685  | 0. 19459648  | 0. 030296363  | 0. 530951718 | 0. 001389784  |
| 0. 576175886 | 0. 102048163  | 0. 034388933 | -0. 001079745 | 0. 982188793 | 0. 065519268  |
| 0. 645846557 | 0. 113984226  | 0. 018056484 | 0. 019868135  | 0. 681193008 | 0. 064698698  |
| 0. 363900265 | 0. 33109806   | 1. 85E-12    | 0. 056771768  | 0. 240088633 | -0. 134647935 |
| 0. 247496536 | 0. 111811787  | 0. 020389301 | 0. 017361971  | 0. 719591675 | -0. 402324205 |
| 0. 399237657 | -0. 096760263 | 0. 044927725 | -0. 051953838 | 0. 282407059 | -0. 006730887 |
| 0. 297343084 | 0. 054487689  | 0. 259560923 | 0. 003891457  | 0. 935871105 | 0. 072228543  |
| 0. 724224301 | 0. 040594275  | 0. 401089717 | 0. 166011577  | 0. 000547274 | 0. 167421019  |
| 0. 217913076 | 0. 019423125  | 0. 687954884 | -0. 212303815 | 8. 98E-06    | -0. 190187782 |
| 4. 13E-05    | 0. 018157752  | 0. 707316836 | -0. 166138273 | 0. 000541867 | -0. 296967437 |
| 0. 031870292 | -0. 001567554 | 0. 974144385 | -0. 236614938 | 6. 94E-07    | -0. 429300768 |
| 0. 931507311 | 0. 085377811  | 0. 07697588  | 0. 227068626  | 1. 96E-06    | 0. 321360204  |
| 0. 743692386 | 0. 032317328  | 0. 503897266 | 0. 064906243  | 0. 179134847 | 0. 099463803  |
| 0. 181986664 | -0. 107665657 | 0. 025575529 | 0. 252121077  | 1. 17E-07    | 0. 406273777  |
| 0. 926238596 | -0. 019735736 | 0. 683202164 | 0. 03690273   | 0. 445306075 | 0. 074228487  |
| 0. 041162767 | 0. 038496858  | 0. 425881319 | -0. 022402242 | 0. 643186123 | 0. 127759918  |
| 0. 224709194 | 0. 082727293  | 0. 086636373 | 0. 113419863  | 0. 018638943 | 0. 175181978  |
| 0. 024087044 | -0. 006807552 | 0. 888063403 | 0. 040859771  | 0. 398014308 | -0. 030245126 |
| 0. 925497629 | 0. 215241453  | 6. 69E-06    | 0. 15730989   | 0. 001064304 | 0. 00393644   |
| 0. 406397999 | 0. 111877602  | 0. 020314952 | 0. 091780981  | 0. 057212161 | 0. 158449981  |
| 0. 506242727 | 0. 090133723  | 0. 06184371  | 0. 105295447  | 0. 029023348 | 0. 209999841  |
| 0. 709689831 | 0. 151556454  | 0. 001622571 | -0. 033264673 | 0. 49146949  | -0. 060512855 |
| 0. 059767886 | 0. 203881033  | 2. 04E-05    | 0. 037721528  | 0. 435266657 | 0. 258335816  |
| 0. 119168171 | 0. 05251471   | 0. 277236514 | 0. 03416158   | 0. 479856234 | 0. 105879388  |
| 0. 6589146   | -0. 048576773 | 0. 314910993 | -0. 147074275 | 0. 00223145  | -0. 096790294 |
| 0. 155654326 | -0. 007159202 | 0. 882322153 | -0. 054414297 | 0. 260204173 | 0. 054008884  |
| 0. 116821924 | -0. 009041275 | 0. 851706141 | -0. 072404369 | 0. 133871939 | -0. 085663095 |
| 0. 61735102  | 0. 011346072  | 0. 814519321 | -0. 12189717  | 0. 011412884 | -0. 082198182 |
| 0. 477070269 | 0. 029306577  | 0. 544464728 | 0. 142662185  | 0. 00302807  | 0. 19277548   |
| 0. 152089223 | -0. 01485058  | 0. 758791069 | 0. 133572873  | 0. 005533679 | 0. 144184756  |
| 0. 095933708 | 0. 033938421  | 0. 482731713 | -0. 00126904  | 0. 979066881 | -0. 040874669 |
| 0. 199859084 | 0. 006127853  | 0. 89917692  | -0. 167002736 | 0. 000506277 | -0. 011194687 |
| 0. 089683989 | -0. 000154357 | 0. 997453558 | -0. 038190777 | 0. 42957228  | -0. 125189064 |
| 0. 129797359 | -0. 037813513 | 0. 434147003 | -0. 079520245 | 0. 099604174 | -0. 218543997 |

|             |              |             |              |             |              |
|-------------|--------------|-------------|--------------|-------------|--------------|
| 0.495188429 | 0.108407314  | 0.024571899 | -0.007492159 | 0.876891757 | 0.012258112  |
| 0.019589115 | -0.011978665 | 0.804381454 | 0.107236651  | 0.026172052 | 0.314016627  |
| 0.35799822  | -0.074163651 | 0.124653977 | -0.072829184 | 0.131599332 | 0.136604286  |
| 0.625364535 | 0.128336481  | 0.007709781 | 0.023551401  | 0.626245422 | 0.203224851  |
| 0.871956222 | -0.041884696 | 0.386275458 | 0.027828154  | 0.564960889 | -0.175136933 |
| 0.931809217 | 0.170652375  | 0.000378656 | 0.083719273  | 0.082912468 | 0.083263105  |
| 0.794576434 | -0.025660246 | 0.595667792 | -0.038661477 | 0.423903872 | 0.059984456  |
| 0.266470506 | -0.011796749 | 0.807293546 | 0.102543114  | 0.033520231 | 0.131179071  |
| 0.159645298 | 0.106645052  | 0.027014289 | -0.044873758 | 0.353261778 | -0.37541383  |
| 0.229149015 | 0.032113303  | 0.50659525  | 0.054795462  | 0.256875362 | 0.250081181  |
| 0.793616455 | -0.078137527 | 0.105651301 | -0.219362876 | 4.40E-06    | -0.063622336 |
| 0.972246483 | -0.068839242 | 0.154152403 | -0.044995971 | 0.35195092  | 0.071090903  |
| 5.40E-05    | -0.012934258 | 0.789129681 | 0.338049913  | 5.90E-13    | 0.242300867  |
| 0.69197919  | -0.144819025 | 0.002610987 | -0.052357847 | 0.278676082 | 0.076111632  |
| 0.292142194 | 0.02429463   | 0.615391886 | -0.094594636 | 0.049967304 | 0.024809438  |
| 0.115111698 | -0.052892465 | 0.273790529 | -0.200357161 | 2.85E-05    | -0.33645082  |
| 0.922803195 | 0.053971182  | 0.264111259 | 0.429119786  | 1.08E-20    | 0.278254081  |
| 0.365219887 | -0.035112677 | 0.46770607  | -0.146863919 | 0.002264591 | -0.126128121 |
| 0.752946749 | -0.176259377 | 0.000239578 | -0.268608594 | 1.53E-08    | -0.365705662 |
| 0.731727748 | 0.019875254  | 0.681085041 | 0.065040676  | 0.178234162 | 0.139894034  |
| 0.961149926 | -0.006029932 | 0.900779662 | -0.041581986 | 0.389720395 | -0.034506267 |
| 0.825662434 | 0.04699741   | 0.330921445 | 0.114023608  | 0.018016439 | 0.269456877  |
| 0.857483118 | 0.36475032   | 5.61E-15    | 0.012354903  | 0.798367273 | -0.030756136 |
| 0.923036779 | 0.032909998  | 0.496103017 | -0.134161661 | 0.005327319 | -0.187135057 |
| 0.528486284 | 0.085688331  | 0.075903731 | 0.145339706  | 0.00251848  | 0.103973321  |
| 0.74865526  | 0.240662767  | 4.41E-07    | 0.233923895  | 9.35E-07    | 0.20224155   |
| 0.208126017 | 0.086397345  | 0.073501154 | 0.031391484  | 0.516200809 | -0.068693613 |
| 0.018211966 | 0.023515151  | 0.626776886 | -0.07497214  | 0.120586796 | -0.056733851 |
| 0.121616198 | 0.06188711   | 0.200260113 | -0.078521818 | 0.103942249 | 0.024654797  |
| 0.406354077 | 0.018490665  | 0.702203875 | -0.245863854 | 2.43E-07    | -0.208932633 |
| 0.054184453 | 0.07667314   | 0.112368267 | -0.072426424 | 0.133753211 | 0.013318273  |
| 0.203708768 | 0.058503657  | 0.226024411 | -0.055104957 | 0.254194226 | -0.022243019 |
| 0.368817495 | -0.07641603  | 0.113581493 | -0.007961474 | 0.869247268 | 0.162108467  |
| 0.054073119 | 0.01166186   | 0.809454546 | -0.101365529 | 0.035618438 | 0.244369035  |
| 0.016290086 | -0.005214414 | 0.914142932 | -0.202840662 | 2.25E-05    | -0.355749559 |
| 0.69107234  | -0.022321457 | 0.64438416  | 0.160290653  | 0.000850617 | 0.199610752  |
| 0.072992605 | -0.048106946 | 0.319619852 | -0.134292106 | 0.005282548 | -0.147783816 |
| 0.915498151 | 0.040335402  | 0.404102044 | 0.391963429  | 3.05E-17    | 0.327566241  |
| 0.846344754 | 0.214839447  | 6.97E-06    | 0.016042468  | 0.74010319  | 0.08333058   |
| 0.482915233 | 0.106686991  | 0.026953824 | -0.187835384 | 8.91E-05    | -0.215616589 |
| 0.761407692 | 0.087025053  | 0.07142616  | 0.132477482  | 0.005936812 | -0.087270916 |
| 0.528225004 | 0.025373332  | 0.599787918 | -0.183292417 | 0.000132267 | -0.227625518 |
| 0.105291338 | 0.041212973  | 0.393944975 | -0.113681868 | 0.01836653  | -0.210943167 |
| 0.00863874  | -0.086771542 | 0.072258349 | 0.039634488  | 0.412325553 | 0.284567503  |
| 0.170154999 | 0.165979557  | 0.000548649 | 0.021222621  | 0.660770197 | 0.136778281  |
| 0.108379802 | -0.013033092 | 0.787556714 | -0.096977313 | 0.044447055 | -0.037763549 |
| 0.789785758 | -0.045287542 | 0.348835927 | 0.091887317  | 0.056923334 | 0.088222696  |
| 0.494766078 | -0.084772148 | 0.079102473 | -0.055565319 | 0.250242144 | 0.02726476   |
| 0.003074756 | -0.001400396 | 0.976900714 | -0.102990321 | 0.032751482 | -0.422077185 |
| 0.885781556 | -0.14454707  | 0.002660525 | 0.038379804  | 0.427290671 | 0.137003277  |
| 0.887701436 | 0.067332178  | 0.163393837 | 0.193327249  | 5.45E-05    | 0.071420349  |

|              |               |              |               |              |               |
|--------------|---------------|--------------|---------------|--------------|---------------|
| 0. 581925256 | -0. 002062841 | 0. 965979332 | 0. 091921278  | 0. 056831344 | 0. 108273419  |
| 0. 932417469 | 0. 177722253  | 0. 000212119 | 0. 004794448  | 0. 921034297 | 0. 066235688  |
| 0. 212756327 | 0. 067012465  | 0. 165406787 | 0. 059756184  | 0. 216224864 | -0. 002378657 |
| 0. 675787569 | 0. 008387297  | 0. 862321715 | 0. 138946236  | 0. 003890837 | 0. 075398136  |
| 0. 9590414   | -0. 054547593 | 0. 259036702 | -0. 029056905 | 0. 547900069 | 0. 07945333   |
| 0. 002284028 | 0. 035164222  | 0. 467052466 | -0. 14939255  | 0. 001894434 | -0. 285965562 |
| 0. 865749083 | 0. 122146354  | 0. 011244522 | -0. 007428202 | 0. 877934429 | -0. 045927317 |
| 0. 76167272  | 0. 034998981  | 0. 469149515 | 0. 221269684  | 3. 61E-06    | 0. 321426768  |
| 0. 452182456 | 0. 058760008  | 0. 223993487 | 0. 064269807  | 0. 183444719 | -0. 084328439 |
| 0. 016994591 | 0. 039500391  | 0. 413910054 | 0. 049637843  | 0. 304444399 | -0. 03086309  |
| 0. 343110403 | 0. 059961408  | 0. 214648739 | -0. 257361669 | 6. 21E-08    | -0. 369250445 |
| 0. 061992012 | -0. 171214618 | 0. 000361896 | 0. 027486095  | 0. 569755166 | 0. 084333803  |
| 0. 209075108 | 0. 030853876  | 0. 523415657 | 0. 244294775  | 2. 91E-07    | 0. 190874308  |
| 0. 500516031 | -0. 003292601 | 0. 945723329 | -0. 168693441 | 0. 000442863 | -0. 086102698 |
| 0. 876395923 | 0. 130261854  | 0. 006833768 | 0. 1840914    | 0. 000123461 | -0. 003030883 |
| 0. 424423818 | 0. 046536279  | 0. 335693335 | -0. 145742742 | 0. 002448937 | -0. 132827093 |
| 0. 340652933 | 8. 95E-05     | 0. 998524088 | -0. 088540589 | 0. 066613006 | 0. 063562759  |
| 0. 571817372 | -0. 037948765 | 0. 43250371  | -0. 003763686 | 0. 937972394 | 0. 046215017  |
| 0. 008174989 | 0. 095622041  | 0. 047520463 | -0. 136719937 | 0. 004508802 | -0. 356163508 |
| 0. 763463334 | 0. 061232046  | 0. 20507376  | 0. 028245427  | 0. 559138722 | 0. 132505358  |
| 0. 177076363 | 0. 111086086  | 0. 021224903 | 0. 017497649  | 0. 717493648 | -0. 059896865 |
| 0. 564673957 | 0. 006703425  | 0. 889764567 | -0. 10933123  | 0. 023369345 | -0. 227011814 |
| 0. 851106454 | 0. 085565914  | 0. 076324949 | 0. 223199233  | 2. 95E-06    | 0. 132739118  |
| 6. 01E-06    | 0. 019161162  | 0. 691947097 | 0. 041458971  | 0. 391125653 | -0. 006675942 |
| 0. 642897055 | 0. 068805701  | 0. 154353682 | 0. 073390402  | 0. 128642855 | 0. 257543514  |
| 0. 309132309 | 0. 042548589  | 0. 378785275 | -0. 131748516 | 0. 00621951  | 0. 027606449  |
| 0. 617014916 | -0. 029187676 | 0. 546099405 | 0. 049932702  | 0. 301577194 | 0. 218244859  |
| 0. 000183396 | -0. 063597508 | 0. 188080087 | 0. 081410253  | 0. 09178723  | 0. 36561759   |
| 0. 551548599 | 0. 049981493  | 0. 301104486 | 0. 059659694  | 0. 216968772 | 0. 207923506  |
| 0. 701267513 | -0. 025912089 | 0. 592061934 | 0. 01713898   | 0. 723044406 | -0. 064062579 |
| 0. 868894309 | 0. 090107356  | 0. 06192029  | 0. 256424547  | 6. 96E-08    | 0. 130861     |
| 0. 446557019 | -0. 011193653 | 0. 816966684 | 0. 022154863  | 0. 646857646 | 0. 142496925  |
| 0. 48743137  | 0. 003039822  | 0. 949884556 | 0. 144060715  | 0. 002751256 | 0. 129645813  |
| 0. 661170795 | -0. 053498508 | 0. 268323203 | -0. 09670729  | 0. 045045699 | -0. 078996597 |
| 0. 553935997 | 0. 084750915  | 0. 079177883 | -0. 206406453 | 1. 60E-05    | -0. 291937446 |
| 0. 944458881 | 0. 107603183  | 0. 025661662 | 0. 07614294   | 0. 114881359 | 0. 000222169  |
| 0. 801442864 | 0. 187097513  | 9. 50E-05    | 0. 093737376  | 0. 052088678 | 0. 053726591  |
| 0. 268687044 | 0. 163469697  | 0. 000666918 | 0. 047459849  | 0. 326180163 | 0. 027929281  |
| 0. 857705534 | 0. 037651887  | 0. 436115441 | 0. 253215786  | 1. 02E-07    | 0. 241759346  |
| 0. 995635313 | 0. 093545483  | 0. 05257368  | 0. 45396172   | 3. 00E-23    | 0. 315279353  |
| 0. 79392423  | 0. 062643513  | 0. 19480468  | 0. 002349509  | 0. 961255036 | 0. 031138772  |
| 0. 317581055 | 0. 086089914  | 0. 074535198 | 0. 080625621  | 0. 094970612 | -0. 019710141 |
| 0. 14657628  | 0. 075146482  | 0. 119723469 | -0. 054754281 | 0. 25723358  | -0. 074713401 |
| 0. 507891984 | 0. 05729504   | 0. 235775971 | 0. 039596941  | 0. 41276885  | 0. 021838265  |
| 0. 18830855  | 0. 040294301  | 0. 40458155  | 0. 062240925  | 0. 197694603 | -0. 023078353 |
| 0. 308471715 | 0. 08230588   | 0. 088258562 | -0. 023620891 | 0. 625227175 | -0. 166315499 |
| 0. 048789518 | 0. 011976123  | 0. 804422127 | -0. 237119549 | 6. 56E-07    | -0. 29975457  |
| 0. 160932857 | 0. 048457604  | 0. 316101039 | 0. 054730713  | 0. 257438746 | 0. 063480711  |
| 0. 000359004 | 0. 212160325  | 9. 11E-06    | 0. 036870087  | 0. 445709022 | -0. 034522529 |
| 0. 365078941 | 0. 103138046  | 0. 032500871 | -0. 093768385 | 0. 052010655 | -0. 15031221  |
| 0. 015820808 | 0. 129693815  | 0. 007082456 | 0. 011647867  | 0. 809678812 | -0. 101214479 |

|             |              |             |              |             |              |
|-------------|--------------|-------------|--------------|-------------|--------------|
| 0.126019203 | 0.065023135  | 0.178351492 | 0.217467323  | 5.34E-06    | 0.293879404  |
| 0.524549014 | -0.070924388 | 0.142026041 | -0.256949049 | 6.53E-08    | -0.237257797 |
| 0.014081009 | 0.052428044  | 0.278031243 | -0.006227599 | 0.897544723 | 0.142663065  |
| 0.008989834 | 0.05758537   | 0.233406845 | -0.11663818  | 0.015525409 | -0.444419936 |
| 0.728028131 | 0.267368529  | 1.79E-08    | 0.163678464  | 0.000656246 | 0.098123963  |
| 0.909349242 | -0.021961071 | 0.649739845 | -0.250794918 | 1.36E-07    | -0.171720147 |
| 0.173830017 | -0.003340694 | 0.944931799 | -0.021593496 | 0.655220996 | 0.055014832  |
| 0.042187655 | -0.03911344  | 0.418502356 | -0.097013018 | 0.0443684   | 0.122356441  |
| 0.463761264 | 0.021996168  | 0.64921746  | -0.020111698 | 0.677502823 | -0.041158155 |
| 0.077600939 | 0.046846533  | 0.332477918 | -0.228611064 | 1.66E-06    | -0.395917239 |
| 0.501401626 | 0.087066099  | 0.071292157 | 0.050210293  | 0.298894324 | 0.13400575   |
| 0.78641231  | 0.245970862  | 2.40E-07    | 0.069314968  | 0.151318987 | 0.12164658   |
| 0.502058307 | -0.01920818  | 0.69122993  | -0.065132639 | 0.177619953 | -0.233858266 |
| 0.089532612 | 0.06496194   | 0.178761277 | 0.026302499  | 0.586491914 | -0.019462857 |
| 0.030863656 | 0.088417905  | 0.066992465 | 0.079431338  | 0.099984531 | -0.015105363 |
| 0.24779873  | 0.140834577  | 0.003427928 | -0.106430093 | 0.027326041 | -0.193556845 |
| 0.221000668 | 0.106565508  | 0.027129292 | 0.237664117  | 6.18E-07    | 0.172959835  |
| 0.544912004 | -0.009362622 | 0.84649962  | 0.097841167  | 0.042576635 | 0.025609977  |
| 0.152374735 | -0.081650318 | 0.090830497 | -0.200763857 | 2.74E-05    | -0.106709564 |
| 0.969310068 | 0.019242646  | 0.690704391 | -0.002413931 | 0.960193547 | 0.058422129  |
| 0.007013686 | 0.193690482  | 5.27E-05    | 0.025248606  | 0.60158299  | -0.054020508 |
| 0.886141139 | -0.155870765 | 0.001184289 | -0.054336192 | 0.260889945 | -0.190302977 |
| 0.121833526 | -0.058925208 | 0.222691613 | -0.117766878 | 0.014546951 | -0.040165157 |
| 0.140965378 | 0.011217581  | 0.816582356 | 0.3443868    | 2.03E-13    | 0.075545162  |
| 0.084082639 | -0.010207339 | 0.832845713 | 0.008400666  | 0.862104445 | -0.033610279 |
| 0.802483084 | 0.011428971  | 0.813188989 | 0.02481739   | 0.607807649 | 0.089584971  |
| 0.357782016 | 0.042374668  | 0.380738827 | -0.102265305 | 0.03400549  | -0.130627766 |
| 0.043369196 | 0.006999138  | 0.884934698 | -0.085562089 | 0.07633814  | -0.204642179 |
| 0.933769221 | -0.036220113 | 0.453775355 | -0.178886415 | 0.000192402 | -0.04108191  |
| 0.474234884 | 0.109740315  | 0.022853362 | 0.01487269   | 0.758443074 | -0.057442871 |
| 0.06936093  | 0.094509319  | 0.050175143 | 0.021375644  | 0.658478329 | 0.314958423  |
| 0.950205634 | -0.05278763  | 0.274743926 | 0.048771392  | 0.312973788 | 0.291407367  |
| 0.829980321 | 0.0540203    | 0.263676191 | -0.166448755 | 0.000528825 | -0.107073606 |
| 0.56620231  | 0.080492998  | 0.09551729  | -0.143444713 | 0.002870213 | 0.024923872  |
| 0.345251816 | -0.034394739 | 0.47686188  | 0.111953184  | 0.020229861 | 0.10982707   |
| 0.606495817 | 0.144266712  | 0.002712488 | 0.049460422  | 0.306178296 | 0.122697099  |
| 0.711020681 | 0.034386878  | 0.476962657 | -0.026435296 | 0.584602824 | 0.157044226  |
| 0.962522378 | 0.076305004  | 0.11410856  | 0.044862987  | 0.353377461 | 0.171432452  |
| 0.101947355 | 0.017272552  | 0.720975539 | -0.219577477 | 4.30E-06    | -0.187638182 |
| 0.861237491 | -0.03344244  | 0.489155865 | 0.017769272  | 0.71329986  | 0.002314499  |
| 0.163392887 | -0.075368985 | 0.118628674 | -0.088964701 | 0.065314798 | -0.313622458 |
| 0.168630464 | 0.046865151  | 0.332285595 | -0.186299446 | 0.000101903 | -0.081966451 |
| 0.255428491 | 0.062839339  | 0.193410188 | -0.020614434 | 0.669910394 | -0.050522207 |
| 0.124153078 | 0.090112014  | 0.061906754 | 0.151148998  | 0.001670853 | 0.057320882  |
| 0.957923181 | -0.009032052 | 0.85185568  | 0.140744338  | 0.003448859 | 0.114945874  |
| 0.375708531 | 0.012808954  | 0.791125154 | -0.147821517 | 0.00211727  | -0.071728137 |
| 0.514296787 | -0.030908408 | 0.522681478 | -0.047876191 | 0.321949325 | -0.096112893 |
| 0.178809686 | 0.026500559  | 0.583675467 | 0.054442146  | 0.259959963 | 0.221743919  |
| 0.321987404 | 0.159019372  | 0.000936377 | 0.186916345  | 9.65E-05    | 0.119047114  |
| 0.843904966 | -0.008360243 | 0.862761416 | 0.023887416  | 0.621328335 | 0.085075545  |
| 0.3634063   | 0.229078111  | 1.58E-06    | 0.380042503  | 3.18E-16    | 0.452530557  |

|              |               |              |               |              |               |
|--------------|---------------|--------------|---------------|--------------|---------------|
| 0. 577747042 | 0. 030156972  | 0. 532844443 | -0. 03969607  | 0. 411599104 | -0. 172017512 |
| 0. 247067123 | 0. 052248336  | 0. 279684084 | -0. 039624294 | 0. 412445882 | -0. 37034287  |
| 0. 123075388 | 0. 044066375  | 0. 361998929 | -0. 214478098 | 7. 23E-06    | -0. 470478807 |
| 0. 058640926 | 0. 018343333  | 0. 704464989 | -0. 078471349 | 0. 104165442 | -0. 137580519 |
| 0. 998616958 | -0. 026100022 | 0. 589377664 | -0. 024808146 | 0. 6079414   | -0. 074193182 |
| 0. 050781339 | -0. 150037535 | 0. 001809332 | -0. 243208181 | 3. 30E-07    | -0. 129654113 |
| 0. 548780875 | 0. 111498768  | 0. 020746151 | -0. 134677407 | 0. 005152277 | -0. 075522935 |
| 0. 149400063 | -0. 013057503 | 0. 787168334 | -0. 204017258 | 2. 02E-05    | -0. 236025683 |
| 0. 243685256 | 0. 024514004  | 0. 612204139 | 0. 333715952  | 1. 21E-12    | 0. 267939536  |
| 0. 883157958 | 0. 419477168  | 9. 36E-20    | 0. 03272083   | 0. 498583794 | 0. 001972131  |
| 0. 505445584 | -0. 01435681  | 0. 76657504  | -0. 02996143  | 0. 535505334 | -0. 043958528 |
| 0. 598584023 | -0. 034190549 | 0. 479483641 | 0. 04937018   | 0. 307062708 | 0. 061429448  |
| 0. 008688818 | -0. 056940393 | 0. 238692866 | -0. 047057923 | 0. 330298507 | -0. 181083593 |
| 0. 623385542 | -0. 001042481 | 0. 982803385 | 0. 063387838  | 0. 189543188 | 0. 143847582  |
| 0. 091970106 | 0. 11627131   | 0. 01585564  | 0. 04291792   | 0. 374657234 | 0. 017698431  |
| 0. 187910152 | -0. 033872193 | 0. 483586877 | -0. 002591754 | 0. 957263899 | 0. 02244264   |
| 0. 012810274 | 0. 041419743  | 0. 391574417 | 0. 0071972    | 0. 881702124 | 0. 151953264  |
| 0. 955644652 | -0. 011236051 | 0. 816285734 | 0. 321795553  | 8. 14E-12    | 0. 129676964  |
| 0. 288134701 | -0. 016506912 | 0. 732861574 | -0. 049380013 | 0. 306966259 | -0. 081600939 |
| 0. 211387302 | 0. 153475369  | 0. 001411929 | 0. 03728629   | 0. 4405869   | 0. 037087921  |
| 0. 481170425 | 0. 046833823  | 0. 332609257 | 0. 105261373  | 0. 029075687 | 0. 038729845  |
| 0. 062175318 | 0. 003982297  | 0. 93437744  | -0. 061591577 | 0. 202421518 | -0. 211528334 |
| 0. 433699978 | 0. 023527336  | 0. 626598213 | 0. 235389138  | 7. 96E-07    | 0. 341031751  |
| 0. 277063833 | -0. 099912555 | 0. 03836024  | -0. 299680306 | 2. 26E-10    | -0. 260296404 |
| 0. 523809398 | -0. 084213836 | 0. 081104751 | -0. 193269785 | 5. 48E-05    | -0. 068790284 |
| 0. 976960702 | -0. 022780716 | 0. 637585709 | -0. 123551667 | 0. 010335542 | -0. 076950636 |
| 0. 612218289 | -0. 017875422 | 0. 711663272 | -0. 176755013 | 0. 000229923 | -0. 03528839  |
| 0. 132298884 | -0. 008463869 | 0. 861077465 | 0. 083074467  | 0. 08531806  | -0. 081063229 |
| 0. 458439696 | -0. 178420889 | 0. 000200071 | -0. 10100113  | 0. 036289924 | 0. 070305983  |
| 0. 731008815 | 0. 029501905  | 0. 541784595 | -0. 047205811 | 0. 328779281 | -0. 172864865 |
| 0. 218650598 | -0. 038564822 | 0. 425064272 | -0. 000966682 | 0. 984053578 | 0. 231824696  |
| 0. 24134614  | 0. 039664683  | 0. 411969264 | 0. 05204374   | 0. 281573921 | -0. 154062655 |
| 0. 44780054  | 0. 038523069  | 0. 425566106 | -0. 163316597 | 0. 000674847 | -0. 139751742 |
| 0. 040469965 | -0. 046092097 | 0. 340331361 | -0. 181103126 | 0. 000159514 | -0. 281713012 |
| 0. 753752832 | 0. 062362623  | 0. 196817734 | -0. 074560376 | 0. 122645089 | -0. 110314585 |
| 0. 272477509 | 0. 017763004  | 0. 71339654  | 0. 123218831  | 0. 010544727 | 0. 111700091  |
| 0. 224090161 | 0. 05515918   | 0. 253726504 | -0. 088347434 | 0. 067211231 | -0. 081371226 |
| 0. 781536229 | -0. 070669691 | 0. 143466873 | -0. 132033417 | 0. 006107617 | -0. 049067257 |
| 0. 092101908 | -0. 064801367 | 0. 179839845 | -0. 09633683  | 0. 045878021 | -0. 09110079  |
| 0. 997252664 | 0. 150397194  | 0. 001763411 | -0. 030772713 | 0. 524509348 | -0. 239021879 |
| 0. 000933791 | 0. 036697775  | 0. 447839491 | -0. 118723711 | 0. 013760346 | -0. 337178468 |
| 0. 85073939  | -0. 009019464 | 0. 852059777 | -0. 061827275 | 0. 200696361 | -0. 289775453 |
| 0. 650774759 | 0. 068876505  | 0. 153929028 | 0. 056349232  | 0. 243611268 | 0. 086646118  |
| 0. 440403282 | 0. 084940431  | 0. 078506879 | 0. 056875308  | 0. 239230917 | 0. 01509725   |
| 0. 676879184 | 0. 057459902  | 0. 234428605 | -0. 094786621 | 0. 049502244 | -0. 142424417 |
| 0. 961901394 | 0. 134549926  | 0. 005195055 | 0. 018320623  | 0. 704813761 | 0. 021282136  |
| 0. 167305484 | 0. 019959417  | 0. 679809111 | -0. 074639759 | 0. 12224616  | -0. 078655802 |
| 0. 070351995 | 0. 082887596  | 0. 086025635 | -0. 14864693  | 0. 00199737  | -0. 042710188 |
| 0. 153307568 | 0. 057016731  | 0. 238062869 | 0. 030611712  | 0. 526682316 | 0. 267914548  |
| 0. 029775593 | 0. 03592432   | 0. 457473216 | 0. 06750957   | 0. 162284924 | 0. 053024821  |
| 0. 973176606 | 0. 09844352   | 0. 041312042 | 0. 005292801  | 0. 912857364 | 0. 020383446  |

|              |               |              |               |              |               |
|--------------|---------------|--------------|---------------|--------------|---------------|
| 0. 083059301 | -0. 050826328 | 0. 292997328 | -0. 145731258 | 0. 002450894 | -0. 305699695 |
| 0. 054909213 | 0. 01296729   | 0. 788603877 | -0. 216690474 | 5. 78E-06    | -0. 248917666 |
| 0. 003304991 | -0. 001439839 | 0. 976250292 | 0. 084686765  | 0. 079406064 | -0. 110118494 |
| 0. 452530895 | -0. 039384084 | 0. 415287243 | -0. 057934089 | 0. 230583554 | -0. 054525319 |
| 0. 73529424  | 0. 003879605  | 0. 936066004 | 0. 00432471   | 0. 928749341 | 0. 100301437  |
| 0. 909630501 | 0. 106727598  | 0. 02689539  | 0. 090341825  | 0. 061242053 | 0. 049283419  |
| 0. 80871668  | 0. 103058507  | 0. 032635602 | 0. 09773767   | 0. 042797171 | 0. 275088875  |
| 0. 994977719 | 0. 015815712  | 0. 743647179 | 0. 04650664   | 0. 33600155  | -0. 087913475 |
| 0. 888513743 | 0. 005625243  | 0. 907407736 | -0. 007681188 | 0. 873811317 | -0. 065387494 |
| 0. 146017506 | 0. 080544723  | 0. 095303781 | -0. 027951879 | 0. 563231543 | 0. 078350636  |
| 0. 747497179 | -0. 052425356 | 0. 278055913 | -0. 042781775 | 0. 376175698 | 0. 057509337  |
| 0. 458049409 | 0. 004135929  | 0. 931851833 | 0. 003342565  | 0. 944901004 | 0. 014389716  |
| 0. 096567227 | 0. 078074046  | 0. 105935746 | 0. 146889192  | 0. 002260586 | -0. 058419112 |
| 0. 315696929 | 0. 03324428   | 0. 491735285 | 0. 045167065  | 0. 350120915 | -0. 044969721 |
| 0. 004839907 | 0. 047749767  | 0. 323230244 | 0. 044037115  | 0. 362318081 | 0. 183963814  |
| 0. 010589642 | -0. 017673468 | 0. 714778067 | 0. 007421585  | 0. 878042305 | 0. 00553228   |
| 0. 172096867 | 0. 006597941  | 0. 891488445 | -0. 201792269 | 2. 49E-05    | -0. 066164535 |
| 0. 247480735 | 0. 033757316  | 0. 485072149 | 0. 070421076  | 0. 144884044 | 0. 185233768  |
| 0. 473271739 | -0. 15783868  | 0. 001023108 | -0. 108182738 | 0. 02487215  | -0. 018950056 |
| 0. 33422671  | -0. 075459387 | 0. 1181861   | -0. 103299279 | 0. 032229213 | -0. 065162779 |
| 0. 33525177  | -0. 111129493 | 0. 0211741   | 0. 006238159  | 0. 897371947 | 0. 037317777  |
| 0. 646990006 | -0. 023813188 | 0. 622413118 | -0. 064293412 | 0. 183283512 | -0. 10048451  |
| 0. 190043932 | -0. 062782243 | 0. 193816011 | 0. 050733504  | 0. 293880872 | 0. 295666551  |
| 0. 995460233 | 0. 165667035  | 0. 000562233 | 0. 108970342  | 0. 023832873 | 0. 085927187  |
| 0. 921586269 | -0. 038853685 | 0. 421601801 | -0. 109111712 | 0. 023650358 | -0. 022350972 |
| 0. 810337732 | 0. 056903494  | 0. 238997799 | -0. 275435401 | 6. 34E-09    | -0. 209766677 |
| 0. 969295468 | -0. 000855052 | 0. 98589483  | 0. 118852187  | 0. 01365763  | 0. 123066427  |
| 0. 559709258 | -0. 140781555 | 0. 003440213 | -0. 105373763 | 0. 028903358 | -0. 063077948 |
| 0. 297905461 | 0. 044735092  | 0. 35475284  | 0. 005448776  | 0. 910299978 | -0. 133066478 |
| 0. 746027325 | -0. 010585547 | 0. 826748398 | 0. 030761549  | 0. 524659875 | 0. 088022037  |
| 0. 233027548 | 0. 073637631  | 0. 127356889 | -0. 211977878 | 9. 28E-06    | -0. 083561091 |
| 0. 162779777 | -0. 038359467 | 0. 427535808 | 0. 202122981  | 2. 41E-05    | 0. 071451837  |
| 0. 31169217  | 0. 003862034  | 0. 936354955 | -0. 374716865 | 8. 80E-16    | -0. 44944587  |
| 0. 690749904 | -0. 047335472 | 0. 327451027 | -0. 049585954 | 0. 304950818 | -0. 024769126 |
| 0. 102128835 | 0. 063362119  | 0. 189723239 | -0. 164464397 | 0. 000617472 | -0. 276110247 |
| 0. 042610386 | 0. 012220425  | 0. 800515565 | 0. 02984018   | 0. 537158611 | 0. 089846919  |
| 0. 00267215  | 0. 042977722  | 0. 373991441 | -0. 186821315 | 9. 74E-05    | -0. 419855493 |
| 0. 139136521 | 0. 021547042  | 0. 655915043 | -0. 066239511 | 0. 170350134 | 0. 024658171  |
| 0. 514020367 | -0. 009057832 | 0. 851437736 | -0. 155291006 | 0. 001236052 | -0. 155392818 |
| 0. 153268563 | 0. 091077274  | 0. 059154328 | 0. 187716313  | 9. 00E-05    | -0. 105282212 |
| 0. 40935386  | 0. 22158084   | 3. 50E-06    | 0. 373285999  | 1. 15E-15    | 0. 363815084  |
| 0. 871988539 | 0. 057750697  | 0. 232065297 | 0. 148706542  | 0. 001988956 | 0. 184414179  |
| 0. 038150144 | 0. 106365808  | 0. 027419872 | 0. 032815671  | 0. 497339213 | 0. 127858819  |
| 0. 426538184 | 0. 208302851  | 1. 33E-05    | 0. 112476134  | 0. 019649564 | 0. 131467991  |
| 0. 90858888  | 0. 019552174  | 0. 685991413 | -0. 254356802 | 8. 93E-08    | -0. 276471261 |
| 0. 219966424 | -0. 019094444 | 0. 692965209 | -0. 055580414 | 0. 250113284 | -0. 069601614 |
| 0. 731769089 | -0. 031564254 | 0. 513893142 | -0. 174717357 | 0. 000272099 | -0. 139199578 |
| 0. 943545913 | 0. 097913749  | 0. 042422548 | 0. 106559724  | 0. 027137671 | 0. 141476608  |
| 0. 243727171 | 0. 050784252  | 0. 293397611 | -0. 006535608 | 0. 892507355 | 0. 132468983  |
| 0. 124262263 | 0. 0691713    | 0. 152170473 | 0. 138764779  | 0. 003938174 | 0. 09296188   |
| 0. 047123173 | 0. 021060187  | 0. 663206498 | 0. 024561954  | 0. 611508357 | 0. 023966286  |

|             |              |             |              |             |              |
|-------------|--------------|-------------|--------------|-------------|--------------|
| 0.388567343 | 0.059974632  | 0.214547464 | -0.068246363 | 0.1577396   | -0.0330002   |
| 0.248842782 | 0.174916603  | 0.000267676 | 0.079061788  | 0.101577915 | 0.274143355  |
| 0.65413656  | -0.03390088  | 0.483216356 | -0.059838732 | 0.2155899   | -0.047986586 |
| 0.291972344 | 0.012747353  | 0.792106657 | -0.073496316 | 0.128090714 | 0.094303062  |
| 0.790516783 | 0.004007115  | 0.933969413 | 0.002898955  | 0.952204091 | 0.062554568  |
| 0.584141242 | 0.010856634  | 0.822384402 | -0.20518828  | 1.80E-05    | -0.166361746 |
| 0.342701419 | -0.019231367 | 0.690876358 | 0.006510411  | 0.89291928  | 0.028868424  |
| 0.671232405 | 0.092953911  | 0.054092582 | 0.122998762  | 0.010685091 | 0.1990404    |
| 0.029761754 | 0.015999505  | 0.740774235 | -0.103940806 | 0.031167444 | 0.009510093  |
| 0.896210809 | 0.152922151  | 0.001469921 | 0.03510218   | 0.467839236 | 0.057466142  |
| 0.420416909 | 0.135848991  | 0.004773745 | -0.10733292  | 0.026037159 | -0.082146359 |
| 0.488074315 | 0.023410096  | 0.628318181 | -0.059886831 | 0.215220539 | -0.024215832 |
| 0.274234162 | 0.025407998  | 0.599289417 | -0.066347322 | 0.169654096 | -0.116821743 |
| 0.863047756 | -0.148126771 | 0.002072183 | -0.074739994 | 0.12174389  | 0.089542492  |
| 0.338012441 | 0.085848421  | 0.075355739 | 0.012281149  | 0.799545305 | -0.095711324 |
| 0.530467714 | -0.096348883 | 0.045850741 | -0.158942098 | 0.000941839 | -0.194805101 |
| 0.522472336 | 0.024762166  | 0.608606875 | 0.179938305  | 0.000176075 | 0.130760915  |
| 0.575784208 | 0.042937936  | 0.374434306 | -0.038280861 | 0.428484066 | -0.126796134 |
| 0.656559461 | 0.020424418  | 0.672776161 | -0.311597628 | 3.90E-11    | -0.169640207 |
| 0.391621955 | -0.097986302 | 0.04226899  | -0.059099715 | 0.221322264 | -0.211042366 |
| 0.107405221 | -0.028563724 | 0.554717168 | -0.136168964 | 0.004674819 | -0.183096948 |
| 0.949606482 | -0.02453371  | 0.611918157 | -0.042375064 | 0.380734368 | 0.030104375  |
| 0.176716496 | 0.042922896  | 0.37460181  | 0.020378906  | 0.673463264 | 0.045652037  |
| 0.090013776 | 0.058306357  | 0.227596394 | 0.342998737  | 2.57E-13    | 0.275058136  |
| 0.241599555 | -0.005341531 | 0.912058279 | -0.232311477 | 1.12E-06    | -0.143563391 |
| 0.51852672  | 0.024732539  | 0.60903585  | 0.223198189  | 2.95E-06    | 0.132127588  |
| 0.244221629 | -0.114485579 | 0.017552444 | -0.13035895  | 0.006792051 | -0.016396087 |
| 0.798729125 | 0.170042556  | 0.000397649 | 0.033154501  | 0.492906316 | 0.11461926   |
| 0.102007467 | -0.072475222 | 0.133490815 | -0.21258461  | 8.73E-06    | -0.246716609 |
| 0.72442546  | 0.16963825   | 0.000410727 | 0.189811652  | 7.48E-05    | 0.160149327  |
| 0.704654236 | 0.129388509  | 0.007219437 | 0.088891057  | 0.065538717 | -0.082266066 |
| 0.41324967  | -0.019668341 | 0.684225744 | -0.078958225 | 0.102028043 | -0.123584461 |
| 0.787435467 | 0.013007281  | 0.787967411 | 0.003886895  | 0.935946124 | 0.079529801  |
| 0.232423112 | 0.096397226  | 0.045741454 | 0.031159757  | 0.519304328 | 0.147054612  |
| 0.311075298 | 0.051582711  | 0.285863981 | 0.054509502  | 0.259369947 | -0.051048488 |
| 0.080569847 | -0.013551277 | 0.779323949 | -0.040769151 | 0.399062418 | -0.102261525 |
| 0.940333474 | 0.040762114  | 0.399143885 | 0.090173072  | 0.061729574 | 0.322712109  |
| 0.296476202 | -0.026872659 | 0.578401169 | -0.102573987 | 0.033466671 | -0.171302999 |
| 0.55462484  | 0.157533755  | 0.00104668  | 0.168684971  | 0.000443162 | 0.089682335  |
| 0.407543055 | -0.103317671 | 0.032198349 | -0.102758412 | 0.033148235 | 0.073115051  |
| 0.818045944 | 0.026718022  | 0.580590347 | 0.071030394  | 0.141429638 | 0.166786454  |
| 0.985883997 | -0.234199034 | 9.07E-07    | -0.062836976 | 0.19342697  | 0.097542142  |
| 0.003895258 | -0.082751207 | 0.086545041 | -0.224220017 | 2.65E-06    | -0.037586748 |
| 0.625751327 | 0.112059442  | 0.020110759 | -0.00947927  | 0.844611294 | 0.072457164  |
| 0.51379561  | -0.046065846 | 0.34060674  | -0.123732742 | 0.010223291 | 0.011550062  |
| 0.15801425  | -0.143112114 | 0.002936369 | -0.108839218 | 0.024003248 | 0.158446873  |
| 0.055307067 | 0.247588197  | 1.99E-07    | 0.277005963  | 5.15E-09    | 0.279106713  |
| 0.011605689 | 0.083901989  | 0.082240854 | 0.130688248  | 0.006652261 | 0.044218916  |
| 0.051673825 | 0.028381791  | 0.557242365 | 0.009605924  | 0.842562018 | 0.02126096   |
| 0.002618056 | 0.065592683  | 0.174570964 | 0.034809241  | 0.47156387  | 0.017527393  |
| 0.057835407 | 0.063212321  | 0.190774383 | -0.232057448 | 1.15E-06    | -0.340888515 |



|              |               |              |               |              |               |
|--------------|---------------|--------------|---------------|--------------|---------------|
| 0. 877923436 | -0. 042225414 | 0. 382420216 | -0. 170441142 | 0. 000385137 | -0. 205951428 |
| 0. 789847299 | 0. 01565867   | 0. 746104778 | -0. 157745515 | 0. 001030257 | -0. 1670943   |
| 0. 008370778 | 0. 071120125  | 0. 140926296 | 0. 026003373  | 0. 590757414 | -0. 059916851 |
| 0. 777143334 | 0. 103747116  | 0. 031484816 | -0. 037668115 | 0. 435917575 | -0. 228696422 |
| 0. 200476288 | 0. 043866142  | 0. 364186473 | -0. 008609879 | 0. 858705811 | 0. 000862972  |
| 0. 09912755  | 0. 107441164  | 0. 025886204 | 0. 030720522  | 0. 52521325  | 0. 05494135   |
| 0. 833382876 | -0. 037887298 | 0. 433250087 | -0. 07359424  | 0. 127581865 | -0. 019509868 |
| 0. 594038117 | -0. 01826982  | 0. 705594182 | 0. 084981648  | 0. 07836156  | 0. 089603339  |
| 0. 206130345 | -0. 02182267  | 0. 651801429 | -0. 018055203 | 0. 708894479 | -0. 240451903 |
| 0. 246059337 | 0. 021359927  | 0. 658713573 | -0. 031922353 | 0. 509127155 | -0. 08366436  |
| 0. 841217292 | 0. 072184118  | 0. 135062044 | -0. 023130739 | 0. 632424584 | -0. 054039501 |
| 0. 31410907  | 0. 098062138  | 0. 042108985 | 0. 020935029  | 0. 665086127 | 0. 068593813  |
| 0. 030259942 | -0. 025789738 | 0. 593812493 | -0. 085413446 | 0. 07685222  | -0. 133280249 |
| 0. 013618969 | -0. 048571499 | 0. 314963595 | -0. 218115155 | 5. 00E-06    | -0. 2534887   |
| 0. 368743817 | 0. 053176451  | 0. 271219214 | -0. 203376061 | 2. 14E-05    | -0. 308421335 |
| 0. 12829154  | 0. 036902961  | 0. 445303222 | -0. 010111909 | 0. 834385798 | -0. 015122042 |
| 0. 046261787 | 0. 151076122  | 0. 001679626 | 0. 379034742  | 3. 86E-16    | 0. 251417473  |
| 0. 763069533 | 0. 0998463    | 0. 038489414 | -0. 037465449 | 0. 438392422 | -0. 020842875 |
| 0. 242755549 | -0. 084798145 | 0. 079010228 | 0. 038285877  | 0. 428423512 | 0. 200869055  |
| 0. 590000259 | -0. 015729187 | 0. 745000913 | -0. 001103728 | 0. 98179324  | -0. 016858113 |
| 9. 78E-06    | 0. 146103138  | 0. 002388239 | 0. 001959419  | 0. 967684034 | -0. 109430004 |
| 0. 782882826 | 0. 124675932  | 0. 009655903 | 0. 148945001  | 0. 001955621 | 0. 227462561  |
| 0. 970916616 | 0. 079825359  | 0. 098307585 | 0. 064218314  | 0. 183796742 | 0. 148320055  |
| 0. 402049941 | -0. 021550956 | 0. 655856543 | 0. 01254934   | 0. 795263854 | -0. 021685696 |
| 0. 167852275 | 0. 043535788  | 0. 367813536 | -0. 123937755 | 0. 010097507 | -0. 233159317 |
| 0. 254533435 | 0. 258869069  | 5. 17E-08    | 0. 073502473  | 0. 128058674 | -0. 032621674 |
| 0. 647431649 | 0. 121968468  | 0. 011364485 | -0. 012303269 | 0. 799191953 | -0. 259895898 |
| 0. 550388791 | 0. 019182076  | 0. 691628059 | 0. 014935769  | 0. 757450562 | -0. 022987784 |
| 0. 000163377 | 0. 080153973  | 0. 096926193 | 0. 04996862   | 0. 301229156 | -0. 071801978 |
| 0. 428612813 | 0. 051975866  | 0. 282202766 | -0. 174294934 | 0. 000281702 | -0. 17250692  |
| 0. 785294216 | 0. 042331469  | 0. 381225011 | -0. 01583381  | 0. 743364113 | -0. 028419328 |
| 0. 997499123 | -0. 048491259 | 0. 31576466  | 0. 118095059  | 0. 014272815 | 0. 171491588  |
| 0. 005073242 | 0. 030823791  | 0. 523820923 | 0. 070410366  | 0. 144945336 | -0. 171093146 |
| 0. 849898453 | -0. 039112481 | 0. 418513776 | -0. 164125536 | 0. 000633922 | 0. 064948599  |
| 0. 389210923 | -0. 023623245 | 0. 625192697 | 0. 102647946  | 0. 033338658 | 0. 077610506  |
| 0. 103999099 | -0. 098211572 | 0. 041795194 | -0. 141133592 | 0. 003359393 | 0. 116117019  |
| 0. 001455257 | 0. 043246183  | 0. 371011577 | -0. 067453641 | 0. 162633935 | 0. 188015397  |
| 0. 222491184 | 0. 076530252  | 0. 113041248 | 0. 01822922   | 0. 706218096 | 0. 083049319  |
| 0. 299330128 | -0. 052403207 | 0. 278259287 | 0. 061905808  | 0. 200123934 | 0. 330417328  |
| 0. 5365569   | 0. 19821513   | 3. 48E-05    | 0. 153431911  | 0. 001416407 | -0. 126883322 |
| 0. 006936535 | 0. 112841782  | 0. 019252475 | -0. 031755283 | 0. 511347844 | -0. 189817898 |
| 0. 111504907 | -0. 002130149 | 0. 964869983 | 0. 040540316  | 0. 401716486 | 0. 040662232  |
| 0. 074224506 | 0. 114457311  | 0. 017580533 | 0. 008739145  | 0. 856607207 | -0. 035158152 |
| 0. 941853417 | -0. 152150174 | 0. 001554505 | -0. 027452582 | 0. 57022592  | -0. 072810163 |
| 0. 529455909 | -0. 134994241 | 0. 005047331 | -0. 150766071 | 0. 001717426 | -0. 116647844 |
| 0. 335158449 | -0. 07865615  | 0. 103350023 | -0. 069301006 | 0. 15140158  | 0. 153092009  |
| 0. 464167147 | 0. 162107505  | 0. 000740598 | -0. 190759511 | 6. 87E-05    | -0. 332510752 |
| 0. 139786386 | -0. 114418733 | 0. 01761893  | -0. 075919436 | 0. 115953856 | -0. 112247087 |
| 0. 20697945  | 0. 056853487  | 0. 2394115   | 0. 008242739  | 0. 864671636 | 0. 186325754  |
| 0. 060520575 | 0. 080199453  | 0. 096736231 | 0. 017986118  | 0. 709958001 | 0. 16470952   |
| 0. 682039734 | 0. 055537729  | 0. 250477787 | -0. 001938478 | 0. 968029221 | 0. 097209097  |

|              |               |              |               |              |               |
|--------------|---------------|--------------|---------------|--------------|---------------|
| 0. 043434206 | 0. 002313702  | 0. 961845075 | -0. 257656338 | 5. 99E-08    | -0. 350115616 |
| 0. 074080862 | 0. 03490977   | 0. 470283838 | -0. 023552058 | 0. 626235795 | -0. 114674065 |
| 0. 430256638 | 0. 042626658  | 0. 377910376 | 0. 094210873  | 0. 050907867 | 0. 154546906  |
| 0. 001078207 | 0. 015150557  | 0. 754073935 | -0. 178108597 | 0. 000205375 | -0. 312902762 |
| 0. 442519144 | 0. 178101973  | 0. 000205489 | 0. 133177349  | 0. 005676311 | 0. 209638094  |
| 0. 72806962  | 0. 095134944  | 0. 048667712 | 0. 134363347  | 0. 00525824  | 0. 041569362  |
| 0. 649363454 | -0. 074513397 | 0. 122881649 | -0. 068009656 | 0. 159189263 | 0. 125236037  |
| 0. 170716136 | -0. 01071162  | 0. 824718186 | 0. 10133249   | 0. 035678881 | 0. 275552413  |
| 0. 023350776 | 0. 035761845  | 0. 459511545 | 0. 047876876  | 0. 321942393 | -0. 054228226 |
| 0. 594787923 | 0. 077634432  | 0. 1079222   | 0. 180473782  | 0. 000168271 | 0. 045749553  |
| 0. 490715779 | 0. 095618825  | 0. 047527964 | 0. 264266492  | 2. 65E-08    | 0. 289878909  |
| 0. 916036093 | -0. 081040333 | 0. 093277244 | -0. 049867773 | 0. 302207014 | 0. 025598814  |
| 0. 061458675 | 0. 240635649  | 4. 42E-07    | -0. 070861354 | 0. 142381591 | -0. 060606616 |
| 0. 007069957 | 0. 077416201  | 0. 108919161 | -0. 185991503 | 0. 000104681 | -0. 339783852 |
| 0. 030077883 | -0. 029370789 | 0. 543582934 | -0. 189940674 | 7. 39E-05    | -0. 294835387 |
| 0. 856581008 | 0. 261683255  | 3. 65E-08    | 0. 406050874  | 1. 69E-18    | 0. 229789778  |
| 0. 839462161 | 0. 011710374  | 0. 808677152 | -0. 226631528 | 2. 06E-06    | -0. 449165554 |
| 0. 104342518 | 0. 007643784  | 0. 874420713 | 0. 103053315  | 0. 032644413 | -0. 082241277 |
| 0. 672294334 | 0. 016322955  | 0. 735727041 | 0. 252996789  | 1. 05E-07    | 0. 190648076  |
| 0. 950414955 | 0. 035912042  | 0. 457627069 | 0. 009770369  | 0. 839902844 | 0. 06779465   |
| 0. 176676931 | 0. 038952229  | 0. 420424372 | -0. 18707168  | 9. 52E-05    | -0. 346659814 |
| 0. 867390846 | 0. 016570166  | 0. 731877129 | -0. 055906255 | 0. 247342995 | -0. 081089978 |
| 0. 305397809 | -0. 097183448 | 0. 043994567 | -0. 057597907 | 0. 233304917 | 0. 053936637  |
| 0. 37860808  | 0. 005522291  | 0. 909094952 | -0. 068814375 | 0. 154301612 | 0. 015440922  |
| 0. 343375192 | 0. 07116009   | 0. 140702556 | 0. 097983607  | 0. 042274686 | 0. 092921406  |
| 0. 303012165 | -0. 04632607  | 0. 337883201 | -0. 060952887 | 0. 20715039  | -0. 056762076 |
| 0. 052180141 | -0. 061052668 | 0. 206406393 | -0. 057170822 | 0. 236794761 | 0. 157240276  |
| 0. 852831701 | 0. 113396763  | 0. 018663129 | 0. 003766355  | 0. 937928491 | 0. 033108808  |
| 0. 277428647 | 0. 12560834   | 0. 009122672 | -0. 008217425 | 0. 865083263 | -0. 186636267 |
| 0. 511735966 | 0. 159343553  | 0. 000913781 | 0. 128262873  | 0. 007745178 | 0. 160054331  |
| 5. 75E-09    | 0. 041744053  | 0. 38787371  | 0. 188695792  | 8. 25E-05    | 0. 02695349   |
| 0. 301547039 | 0. 044623038  | 0. 355960628 | -0. 143602605 | 0. 002839284 | 0. 107021965  |
| 0. 880998982 | 0. 074175375  | 0. 124594243 | 0. 105236745  | 0. 029113568 | 0. 095569432  |
| 0. 004081568 | 0. 060036812  | 0. 214071712 | 0. 079366992  | 0. 100260534 | -0. 21238643  |
| 0. 037761307 | 0. 072212274  | 0. 134909453 | -0. 160954843 | 0. 000808755 | -0. 327202863 |
| 0. 007850663 | -0. 084104252 | 0. 081502528 | 0. 027698252  | 0. 566779313 | 0. 356335038  |
| 0. 758303674 | -0. 156647349 | 0. 001118078 | -0. 13509814  | 0. 005013337 | 0. 007005381  |
| 0. 116409826 | -0. 153006845 | 0. 001460903 | -0. 129122692 | 0. 007340626 | -0. 102604897 |
| 0. 029561851 | -0. 096016284 | 0. 046608583 | -0. 175202136 | 0. 000261456 | -0. 138825793 |
| 0. 103924551 | 0. 350360018  | 7. 29E-14    | 0. 040564555  | 0. 401434856 | 0. 006121945  |
| 0. 152627007 | -0. 011984682 | 0. 804285179 | -0. 219370065 | 4. 40E-06    | -0. 274699145 |
| 0. 030203706 | 0. 121384604  | 0. 011766226 | 0. 226456304  | 2. 10E-06    | 0. 2737316    |
| 0. 85888111  | 0. 049141344  | 0. 309312967 | 0. 210737583  | 1. 05E-05    | 0. 140078     |
| 0. 633572982 | 0. 11171341   | 0. 020500873 | 0. 097759054  | 0. 042751527 | -0. 038926539 |
| 0. 332888038 | -0. 01355614  | 0. 779246804 | -0. 044613154 | 0. 356067282 | -0. 031542347 |
| 0. 142097834 | 0. 190664538  | 6. 93E-05    | 0. 225631368  | 2. 29E-06    | 0. 175624421  |
| 0. 679549973 | 0. 003770598  | 0. 937858711 | 0. 005497158  | 0. 909506898 | 0. 139026516  |
| 0. 418475726 | -0. 023117751 | 0. 632615779 | 0. 02753338   | 0. 569091275 | -0. 089491955 |
| 0. 005697028 | 0. 034005306  | 0. 481868892 | -0. 262108137 | 3. 47E-08    | -0. 375238567 |
| 0. 783495261 | 0. 022022157  | 0. 648830769 | 0. 085601809  | 0. 076201245 | 0. 237004015  |
| 0. 482697518 | 0. 01689367   | 0. 726849234 | 0. 217859085  | 5. 13E-06    | 0. 146909475  |

|              |               |              |               |              |               |
|--------------|---------------|--------------|---------------|--------------|---------------|
| 0. 228168116 | -0. 035119414 | 0. 467620612 | -0. 102974756 | 0. 032777983 | -0. 181951506 |
| 0. 209365161 | 0. 024293568  | 0. 615407347 | 0. 027897238  | 0. 563994972 | 0. 082789419  |
| 0. 160748063 | 0. 18187116   | 0. 000149406 | 0. 252957503  | 1. 06E-07    | 0. 159620015  |
| 0. 993969274 | 0. 096489404  | 0. 045533678 | -0. 003115812 | 0. 948633468 | 0. 006749681  |
| 0. 54073564  | 0. 039386448  | 0. 415259217 | 0. 054289934  | 0. 261296674 | 0. 112864317  |
| 0. 799613996 | 0. 008584161  | 0. 859123455 | 0. 237109681  | 6. 57E-07    | 0. 234996493  |
| 0. 069673804 | 0. 019414594  | 0. 688084759 | -0. 072363206 | 0. 134093744 | -0. 106689071 |
| 0. 090059739 | -0. 055789033 | 0. 248337138 | 0. 046485498  | 0. 336221509 | 0. 273363561  |
| 0. 520980789 | 0. 03235767   | 0. 503364695 | 0. 283091145  | 2. 29E-09    | 0. 220840695  |
| 0. 795011884 | 0. 151627409  | 0. 001614295 | 0. 028322933  | 0. 558060501 | 0. 089759256  |
| 0. 60531519  | -0. 181746823 | 0. 000151001 | -0. 246127776 | 2. 36E-07    | -0. 324096758 |
| 0. 014319637 | 0. 034281007  | 0. 478321206 | -0. 147458035 | 0. 002172126 | -0. 194488941 |
| 0. 525120393 | 0. 067471768  | 0. 162520756 | 0. 179764517  | 0. 00017868  | 0. 217657271  |
| 0. 051999393 | -0. 026279684 | 0. 586816754 | 0. 090040385  | 0. 062115146 | 0. 169342025  |
| 0. 551684562 | 0. 122122738  | 0. 011260384 | 0. 004865303  | 0. 919871185 | -0. 263089777 |
| 0. 737909746 | 0. 02683212   | 0. 578974701 | -0. 03490693  | 0. 470319971 | -0. 093978864 |
| 0. 277799429 | -0. 037922131 | 0. 432827028 | 0. 059739321  | 0. 216354738 | 0. 103578702  |
| 0. 791901746 | 0. 361361512  | 1. 04E-14    | 0. 304779779  | 1. 08E-10    | 0. 251319435  |
| 0. 620306462 | 0. 158526509  | 0. 000971721 | 0. 044855234  | 0. 35346074  | 0. 102509984  |
| 0. 305753911 | 0. 047935771  | 0. 321346803 | 0. 266720976  | 1. 95E-08    | 0. 232173563  |
| 0. 592794544 | 0. 014810309  | 0. 759425022 | 0. 002113481  | 0. 965144696 | -0. 005828805 |
| 0. 523201418 | 0. 354439478  | 3. 57E-14    | -0. 011901769 | 0. 805612065 | -0. 059748678 |
| 0. 069287345 | 0. 011240849  | 0. 816208682 | -0. 057277822 | 0. 235916996 | -0. 137701958 |
| 0. 572912989 | -0. 079045256 | 0. 101649666 | -0. 182198705 | 0. 000145281 | 0. 003161329  |
| 0. 06733748  | -0. 019837798 | 0. 681653175 | -0. 094389321 | 0. 050468688 | 0. 081347285  |
| 0. 041302295 | 0. 010555739  | 0. 827228573 | -0. 04011817  | 0. 406640213 | -0. 248285548 |
| 0. 487564378 | 0. 071327243  | 0. 139769723 | 0. 079210781  | 0. 100933096 | 0. 081112989  |
| 0. 141352578 | 0. 095662277  | 0. 047426719 | -0. 062824754 | 0. 193513795 | -0. 062832157 |
| 0. 023640063 | 0. 067920876  | 0. 159735558 | 0. 009306641  | 0. 847406161 | 0. 064811749  |
| 0. 226571294 | 0. 052249035  | 0. 279677645 | 0. 106431017  | 0. 027324695 | 0. 16400834   |
| 0. 514541138 | 0. 024240369  | 0. 616181482 | 0. 344264503  | 2. 08E-13    | 0. 061485799  |
| 0. 457927935 | 0. 034284412  | 0. 478277488 | 0. 123801782  | 0. 010180778 | 0. 052894727  |
| 0. 783079824 | -0. 014211318 | 0. 768873149 | 0. 006435712  | 0. 894140642 | 0. 032716804  |
| 0. 409917882 | 0. 016567333  | 0. 731921202 | 0. 18051912   | 0. 000167625 | -0. 033377254 |
| 0. 549199554 | -0. 032631304 | 0. 499760145 | -0. 009993184 | 0. 836302713 | 0. 051964184  |
| 0. 979986083 | 0. 049316516  | 0. 307589443 | 0. 140111925  | 0. 00359883  | 0. 004842317  |
| 0. 086511588 | 0. 132736203  | 0. 005839287 | 0. 09602808   | 0. 046581527 | 0. 061237652  |
| 0. 119927444 | 0. 033278768  | 0. 491285828 | -0. 050250968 | 0. 29850255  | 0. 052611811  |
| 0. 29456435  | 0. 154879661  | 0. 001274033 | 0. 04994415   | 0. 301466235 | -0. 026630037 |
| 0. 638509509 | -0. 028305623 | 0. 558301219 | 0. 091303948  | 0. 058522861 | 0. 05048205   |
| 0. 039782734 | 0. 016180109  | 0. 737954654 | 0. 266641801  | 1. 96E-08    | 0. 4171243    |
| 0. 716075998 | 0. 083883076  | 0. 082310167 | 0. 171109341  | 0. 000364981 | 0. 257409     |
| 0. 155903568 | -0. 044849733 | 0. 353519829 | 0. 291563039  | 7. 15E-10    | 0. 132932705  |
| 0. 825237092 | -0. 02366438  | 0. 624590276 | 0. 039432605  | 0. 414712378 | 0. 116620107  |
| 0. 305830313 | 0. 010884487  | 0. 82193634  | 0. 30921993   | 5. 57E-11    | 0. 231427801  |
| 0. 019864415 | 0. 115575009  | 0. 016499366 | -0. 173985623 | 0. 000288933 | -0. 160341119 |
| 0. 720243183 | 0. 133226144  | 0. 005658539 | -0. 000673789 | 0. 98888478  | -0. 00923476  |
| 0. 807878106 | -0. 045856319 | 0. 342809829 | 0. 261328957  | 3. 82E-08    | 0. 429455364  |
| 0. 698260637 | 0. 098354804  | 0. 041496279 | -0. 114448992 | 0. 017588807 | -0. 228058874 |
| 0. 428488224 | -0. 043634219 | 0. 366730493 | -0. 030209544 | 0. 532130191 | 0. 042009624  |
| 0. 002080931 | 0. 124432879  | 0. 009799374 | 0. 122964812  | 0. 010706891 | 0. 00529814   |

|             |              |             |              |             |              |
|-------------|--------------|-------------|--------------|-------------|--------------|
| 0.899091818 | -0.046379005 | 0.337330887 | 0.07114534   | 0.140785101 | 0.129842983  |
| 0.145976268 | 0.033779086  | 0.484790486 | -0.289175234 | 9.96E-10    | -0.180183405 |
| 0.3266067   | 0.019478279  | 0.687115472 | -0.369515758 | 2.33E-15    | -0.455205534 |
| 0.116525384 | 0.032646202  | 0.499564282 | -0.132577868 | 0.005898799 | -0.167084749 |
| 0.316587054 | 0.154007408  | 0.001358147 | 0.028987008  | 0.548863726 | -0.007147276 |
| 0.60025304  | -0.11295815  | 0.019127576 | -0.177215267 | 0.000221283 | -0.113069046 |
| 0.55760163  | 0.061073879  | 0.206248488 | 0.193548579  | 5.34E-05    | 0.135857851  |
| 0.168398828 | 0.283797463  | 2.08E-09    | 0.030392349  | 0.529650345 | 0.107947977  |
| 0.983549931 | 0.098887011  | 0.040401358 | 0.035328688  | 0.464970408 | 0.228868436  |
| 0.658467714 | 0.123735502  | 0.010221589 | 0.07343794   | 0.128394805 | 0.012601063  |
| 0.32378473  | -0.027875781 | 0.564294889 | -0.076528138 | 0.11305123  | -0.012499687 |
| 0.636629561 | 0.185329298  | 0.000110898 | 0.092225078  | 0.056013917 | 0.082950441  |
| 0.811175513 | -0.001789089 | 0.970491886 | 0.128034258  | 0.007856041 | 0.09973381   |
| 0.128956813 | 0.059265082  | 0.220030194 | 0.023199194  | 0.631417279 | -0.13288383  |
| 0.549203133 | 0.001271153  | 0.979032038 | -0.052414336 | 0.278157086 | -0.033658934 |
| 0.084100117 | -0.017524346 | 0.71708107  | 0.028161813  | 0.560303053 | 0.051385647  |
| 2.07E-05    | 0.120387289  | 0.012481541 | -0.137791469 | 0.004201089 | 0.013887361  |
| 0.583308763 | -0.000950777 | 0.984315928 | 0.007993216  | 0.868730664 | -0.119316859 |
| 0.658095539 | 0.033217137  | 0.492089159 | 0.035357162  | 0.464610466 | 0.195079256  |
| 0.343259332 | 0.068525484  | 0.156043014 | -0.043408248 | 0.369219814 | -0.294833158 |
| 0.574488968 | 0.084105325  | 0.081498626 | 0.169999247  | 0.000399031 | 0.150080473  |
| 0.93612637  | -0.04200702  | 0.384888638 | -0.1544569   | 0.001314183 | 0.018717121  |
| 0.29920685  | -0.020317773 | 0.674386638 | 0.144283264  | 0.002709395 | 0.313920809  |
| 0.057277923 | 0.031122295  | 0.519806964 | 0.002520302  | 0.958441003 | 0.022077473  |
| 0.289865463 | 0.006075262  | 0.900037671 | -0.080124657 | 0.097048794 | -0.141301634 |
| 0.12217904  | -0.013087376 | 0.786693135 | 0.102127631  | 0.034248179 | 0.245326006  |
| 0.2315035   | 0.059199736  | 0.22054012  | 0.260146026  | 4.42E-08    | 0.120349767  |
| 0.164339766 | 0.002628796  | 0.956653695 | -0.255660009 | 7.63E-08    | -0.109882767 |
| 0.279099431 | 0.012253132  | 0.799992924 | 0.079169125  | 0.10111305  | 0.085497914  |
| 0.171257349 | 0.041293724  | 0.393018153 | -0.001297938 | 0.978590311 | 0.075087534  |
| 0.270096118 | 0.015755491  | 0.744589291 | -0.047917806 | 0.321528402 | 0.174926094  |
| 0.256812842 | -0.032077984 | 0.507063066 | -0.079282247 | 0.100624959 | -0.094163501 |
| 0.000187051 | 0.074874863  | 0.121070608 | 0.269019124  | 1.45E-08    | 0.209995732  |
| 0.072128107 | -0.040880575 | 0.397773922 | -0.115900685 | 0.016195486 | -0.276159306 |
| 0.618035503 | -0.108648062 | 0.024253508 | -0.002451741 | 0.959570571 | 0.085724363  |
| 0.413912434 | 0.289268461  | 9.83E-10    | 0.012130072  | 0.801959797 | -0.112924704 |
| 0.299465278 | 0.071976397  | 0.136191902 | -0.072906532 | 0.131188775 | -0.219137366 |
| 0.562852745 | -0.021378742 | 0.658431962 | 0.123045168  | 0.010655355 | 0.128521366  |
| 0.779445763 | 0.11830621   | 0.014098846 | 0.193947916  | 5.15E-05    | 0.067313621  |
| 0.47483167  | 0.022425243  | 0.642845188 | 0.004689422  | 0.922758633 | 0.014423453  |
| 0.788852415 | 0.003932845  | 0.935190544 | 0.114513503  | 0.017524736 | 0.009832488  |
| 0.071890243 | 0.076748622  | 0.11201403  | 0.011619861  | 0.810127708 | -0.013706709 |
| 0.619436741 | 0.171754129  | 0.000346467 | 0.020731032  | 0.668154263 | -0.148800438 |
| 0.022709371 | 0.062460294  | 0.196116038 | 0.05372505   | 0.266298807 | 0.141282716  |
| 0.308639804 | 0.058141483  | 0.228915972 | -0.057471973 | 0.234330162 | 0.031440983  |
| 0.57723745  | 0.068059033  | 0.158886036 | 0.210448569  | 1.08E-05    | 0.311293255  |
| 0.021921335 | 0.050599197  | 0.295162422 | 0.141627903  | 0.003248817 | 0.395387825  |
| 0.176615812 | -0.035309214 | 0.465216674 | -0.129359923 | 0.007232384 | -0.046764117 |
| 0.211495358 | -0.051628415 | 0.285436727 | -0.091387144 | 0.058292498 | -0.167339882 |
| 0.261783045 | -0.033569948 | 0.48749995  | -0.034370491 | 0.47717281  | 0.060679718  |
| 0.003291128 | 0.092577885  | 0.055076897 | -0.113930655 | 0.018111082 | -0.265384292 |

|              |               |              |               |              |               |
|--------------|---------------|--------------|---------------|--------------|---------------|
| 0. 827724467 | 0. 018578143  | 0. 700862585 | 0. 100439328  | 0. 037346225 | 0. 116512013  |
| 0. 678834868 | -0. 008335561 | 0. 863162599 | -0. 044496994 | 0. 357322296 | -0. 035661235 |
| 0. 295152622 | 0. 058695722  | 0. 22450156  | 0. 084733359  | 0. 079240276 | 0. 00903358   |
| 0. 632295375 | 0. 027386501  | 0. 571154702 | -0. 14989149  | 0. 001828289 | -0. 101016593 |
| 0. 414090441 | -0. 019794249 | 0. 682313952 | 0. 186953774  | 9. 62E-05    | 0. 181765451  |
| 0. 518011403 | 0. 005750717  | 0. 90535199  | 0. 022096296  | 0. 647728127 | -0. 051860419 |
| 0. 908093939 | 0. 016960862  | 0. 725806394 | 0. 008661761  | 0. 857863401 | 0. 069506616  |
| 0. 491640072 | 0. 069865281  | 0. 148090851 | 0. 021509737  | 0. 656472599 | -0. 142559373 |
| 0. 100877117 | -0. 073706677 | 0. 126999534 | 0. 078588534  | 0. 103647783 | 0. 225998767  |
| 0. 385741222 | -0. 183321874 | 0. 000131932 | -0. 227662553 | 1. 84E-06    | 0. 0234201    |
| 0. 703351751 | 0. 03666359   | 0. 448262837 | 0. 006956311  | 0. 885633929 | -0. 040713752 |
| 0. 733768302 | -0. 028616562 | 0. 553984827 | 0. 096537296  | 0. 045426041 | 0. 060673734  |
| 0. 008660778 | 0. 059384532  | 0. 219100257 | -0. 033184698 | 0. 492512273 | -0. 181492676 |
| 0. 45253562  | 0. 070638306  | 0. 143645185 | 0. 06277318   | 0. 193880489 | -0. 092092917 |
| 0. 002989889 | -0. 019208345 | 0. 691227405 | -0. 004252269 | 0. 929939735 | 0. 14632187   |
| 0. 490532913 | 0. 011174738  | 0. 817270531 | 0. 001741231  | 0. 971280873 | 0. 132493137  |
| 0. 926366522 | -0. 01015216  | 0. 833736134 | 0. 122423465  | 0. 011059877 | 0. 047367302  |
| 0. 308449693 | -0. 005245502 | 0. 91363305  | 0. 022155464  | 0. 646848703 | 0. 052822796  |
| 0. 545502584 | 0. 066151773  | 0. 170918156 | 0. 363044566  | 7. 66E-15    | 0. 282356694  |
| 0. 425444796 | -0. 044969638 | 0. 35223311  | 0. 022818094  | 0. 637033723 | -0. 066905532 |
| 0. 046044773 | -0. 088287468 | 0. 067397849 | 0. 023835378  | 0. 622088742 | 0. 01442778   |
| 0. 050306389 | -0. 049438418 | 0. 306393789 | 0. 008940816  | 0. 853335146 | 0. 196340091  |
| 0. 125226676 | -0. 026878726 | 0. 578315364 | -0. 218195252 | 4. 96E-06    | -0. 279770899 |
| 0. 038327013 | -0. 000362433 | 0. 994020949 | 0. 006046651  | 0. 900505989 | 0. 126263638  |
| 8. 86E-05    | 0. 006508408  | 0. 892952027 | 0. 013230548  | 0. 784416754 | -0. 072215311 |
| 0. 393168793 | 0. 003194602  | 0. 947336407 | 0. 005804421  | 0. 90447231  | 0. 088003842  |
| 0. 601992014 | 0. 023608491  | 0. 625408818 | 0. 126597598  | 0. 008585721 | 0. 383502637  |
| 0. 693030815 | 0. 141193063  | 0. 003345911 | 0. 39745803   | 1. 00E-17    | 0. 217438759  |
| 0. 240211452 | 0. 055187871  | 0. 253479252 | 0. 194075779  | 5. 09E-05    | 0. 086510736  |
| 0. 877245491 | -0. 025803733 | 0. 593612146 | -0. 005207542 | 0. 914255648 | 0. 070679086  |
| 0. 184639927 | -0. 058754026 | 0. 224040735 | -0. 07670668  | 0. 112210752 | -0. 112704203 |
| 0. 189599854 | -0. 070691795 | 0. 143341388 | -0. 277985035 | 4. 53E-09    | -0. 200347799 |
| 0. 028053851 | 0. 141584254  | 0. 003258446 | -0. 026627111 | 0. 581879165 | -0. 003012265 |
| 0. 019101015 | 0. 044564616  | 0. 356591358 | -0. 116535804 | 0. 015616948 | -0. 172573476 |
| 0. 550412575 | 0. 000970429  | 0. 983991784 | -0. 173658581 | 0. 000296767 | -0. 232764803 |
| 0. 395947384 | 0. 010974477  | 0. 820489064 | 0. 003063015  | 0. 949502691 | -0. 018851492 |
| 0. 351007738 | 0. 029145587  | 0. 546678633 | -0. 214641723 | 7. 11E-06    | -0. 301105679 |
| 0. 446047613 | -0. 037174252 | 0. 44196241  | 0. 313733245  | 2. 82E-11    | 0. 181573936  |
| 0. 769702402 | 0. 010429945  | 0. 829255717 | 0. 197441274  | 3. 74E-05    | 0. 24929178   |
| 0. 680114463 | 0. 081946824  | 0. 089659884 | 0. 055563578  | 0. 250257005 | 0. 139838676  |
| 0. 71427273  | 0. 50268062   | 6. 47E-29    | 0. 122728872  | 0. 01085949  | 0. 143830115  |
| 0. 004455999 | 0. 044780632  | 0. 354262719 | -0. 132163363 | 0. 006057183 | -0. 192042074 |
| 0. 342943587 | 0. 007134888  | 0. 882718915 | -0. 065459416 | 0. 17545017  | -0. 116479657 |
| 0. 467201358 | 0. 036471779  | 0. 450642425 | 0. 029989131  | 0. 535127978 | 0. 300453838  |
| 0. 49724011  | -0. 009377518 | 0. 846258424 | 0. 215715896  | 6. 38E-06    | 0. 114661816  |
| 0. 901061055 | 0. 021662534  | 0. 654190106 | 0. 0919375    | 0. 056787446 | 0. 235452097  |
| 0. 833922717 | 0. 140892865  | 0. 00341447  | 0. 152026032  | 0. 001568516 | 0. 108362408  |
| 0. 518512379 | -0. 005017012 | 0. 917381401 | 0. 029453794  | 0. 542444125 | -0. 011597651 |
| 0. 270660987 | -0. 040140367 | 0. 406380424 | -0. 180690509 | 0. 000165206 | -0. 029452372 |
| 0. 543656687 | 0. 106141949  | 0. 027748782 | 0. 070419699  | 0. 144891923 | -0. 089607488 |
| 0. 422089732 | -0. 06228632  | 0. 197367182 | -0. 020688176 | 0. 668799528 | -0. 021987512 |

|              |               |              |               |              |               |
|--------------|---------------|--------------|---------------|--------------|---------------|
| 0. 375992277 | -0. 019055402 | 0. 693561255 | -0. 10584625  | 0. 028188436 | -0. 251287558 |
| 0. 027280932 | 0. 02573151   | 0. 594646439 | 0. 111457289  | 0. 020793843 | 0. 379389984  |
| 0. 570363032 | -0. 048950671 | 0. 311196212 | -0. 141878166 | 0. 003194103 | -0. 152626939 |
| 0. 45031979  | 0. 091214532  | 0. 058771288 | 0. 038769073  | 0. 422614296 | 0. 061908077  |
| 0. 295438702 | -0. 091916085 | 0. 056845401 | -0. 089373644 | 0. 064082779 | -0. 026286415 |
| 0. 59899849  | 0. 036516977  | 0. 450081064 | 0. 162314422  | 0. 000728941 | -0. 003167994 |
| 0. 973829685 | 0. 340486944  | 3. 93E-13    | -0. 02627601  | 0. 586869078 | -0. 129191393 |
| 0. 050687028 | -0. 009707047 | 0. 840926578 | -0. 105440113 | 0. 028802034 | -0. 029029196 |
| 0. 068215166 | 0. 0481595    | 0. 31909085  | -0. 228723485 | 1. 64E-06    | -0. 213628092 |
| 0. 416175215 | -0. 094761927 | 0. 049561859 | -0. 088462839 | 0. 06685328  | -0. 122872298 |
| 0. 827490558 | 0. 243121681  | 3. 33E-07    | 0. 202977943  | 2. 23E-05    | 0. 033723051  |
| 0. 077793137 | 0. 123571483  | 0. 010323206 | 0. 012394517  | 0. 797734742 | -0. 064489681 |
| 0. 07508683  | -0. 008966038 | 0. 852926089 | 0. 215285706  | 6. 66E-06    | 0. 357798008  |
| 9. 81E-05    | 0. 118679549  | 0. 013795811 | 0. 211503909  | 9. 72E-06    | -0. 066361823 |
| 0. 373530973 | 0. 025535307  | 0. 597460347 | 0. 00411117   | 0. 932258818 | -0. 038662778 |
| 0. 368966242 | -0. 043559239 | 0. 367555327 | -0. 193638888 | 5. 30E-05    | -0. 156459625 |
| 0. 896196129 | 0. 002245438  | 0. 962969977 | -0. 032178235 | 0. 505735777 | -0. 000726517 |
| 0. 715288922 | 0. 059541834  | 0. 217879919 | -0. 203986801 | 2. 02E-05    | -0. 357267683 |
| 0. 388214273 | -0. 001084013 | 0. 982118402 | 0. 251558913  | 1. 25E-07    | 0. 264482508  |
| 0. 675042033 | 0. 05194016   | 0. 28253396  | 0. 044441565  | 0. 35792213  | 0. 176708984  |
| 0. 765052433 | 0. 142626939  | 0. 003035362 | 0. 200951859  | 2. 70E-05    | 0. 221803269  |
| 0. 09353793  | 0. 024736304  | 0. 608981331 | 0. 135334189  | 0. 004936873 | 0. 276358001  |
| 0. 645415066 | 0. 005260531  | 0. 913386581 | 0. 163488729  | 0. 000665939 | 0. 174388288  |
| 0. 316306661 | 0. 037180823  | 0. 441881662 | -0. 093958357 | 0. 051534782 | -0. 118251115 |
| 0. 562583593 | 0. 331790668  | 1. 65E-12    | 0. 102844307  | 0. 033000809 | 0. 127966302  |
| 0. 875315105 | -0. 110349036 | 0. 02210384  | -0. 111988269 | 0. 020190467 | -0. 024151159 |
| 0. 089365078 | 0. 023225298  | 0. 631033354 | 0. 138132407  | 0. 00410724  | 0. 015514888  |
| 0. 033279532 | -0. 043917038 | 0. 363629655 | 0. 077530643  | 0. 108395448 | 0. 258666057  |
| 0. 657343838 | -0. 024784721 | 0. 608280402 | 0. 010866797  | 0. 82222091  | -0. 035959716 |
| 0. 960772169 | 0. 064870404  | 0. 179375536 | -0. 118591064 | 0. 01386711  | -0. 195941686 |
| 0. 645186937 | -0. 005646632 | 0. 907057263 | 0. 356400677  | 2. 52E-14    | 0. 099404605  |
| 0. 300679761 | 0. 226713786  | 2. 04E-06    | -0. 015049861 | 0. 755656361 | -0. 069089117 |
| 0. 076047649 | 0. 074006735  | 0. 125455567 | -0. 237261208 | 6. 46E-07    | -0. 367517915 |
| 0. 20289665  | 0. 180019962  | 0. 000174863 | 0. 09661242   | 0. 045257627 | 0. 171375946  |
| 0. 736656651 | 0. 012075265  | 0. 802836174 | 0. 128421733  | 0. 007668967 | 0. 199830557  |
| 0. 602128821 | 0. 034046288  | 0. 481340645 | 0. 251251088  | 1. 29E-07    | 0. 203472212  |
| 0. 784548677 | -0. 05476832  | 0. 257111427 | -0. 084778175 | 0. 079081079 | 0. 033753633  |
| 0. 764372935 | 0. 118351521  | 0. 014061758 | 0. 082046642  | 0. 089268538 | 0. 259176816  |
| 0. 04230515  | -0. 044263016 | 0. 359858637 | -0. 072087444 | 0. 135586985 | -0. 03261452  |
| 0. 000153286 | -0. 005847162 | 0. 903772288 | -0. 069024346 | 0. 153045191 | -0. 401174739 |
| 0. 034129824 | 0. 065236361  | 0. 1769291   | -0. 122928717 | 0. 010730113 | -0. 18180773  |
| 0. 754742879 | 0. 054291852  | 0. 261279798 | -0. 013835184 | 0. 77482369  | -0. 033326947 |
| 0. 227211144 | -0. 053684943 | 0. 266656443 | 0. 17314398   | 0. 000309496 | 0. 206375074  |
| 0. 50074028  | 0. 012338506  | 0. 798629141 | -0. 053084542 | 0. 27204958  | 0. 01888178   |
| 0. 7956488   | 0. 117996787  | 0. 014354423 | -0. 036003951 | 0. 456476057 | -0. 159444971 |
| 0. 123765294 | 0. 02020658   | 0. 676067368 | 0. 016589213  | 0. 731580776 | 0. 031924449  |
| 0. 242151447 | 0. 125462906  | 0. 009204081 | 0. 291841633  | 6. 87E-10    | 0. 360244847  |
| 0. 895562631 | -0. 015608443 | 0. 746891338 | 0. 108058673  | 0. 025039374 | 0. 216566544  |
| 0. 877889082 | -0. 010765908 | 0. 823844326 | -0. 092907708 | 0. 054212735 | -0. 096450765 |
| 0. 683259848 | -0. 002031343 | 0. 966498495 | 0. 010474871  | 0. 828531606 | 0. 046931883  |
| 0. 985382583 | 0. 096999641  | 0. 044397855 | 0. 049869058  | 0. 302194541 | -0. 00355462  |

|             |              |             |              |             |              |
|-------------|--------------|-------------|--------------|-------------|--------------|
| 0.746072951 | -0.095986561 | 0.046676817 | -0.017623838 | 0.71554426  | 0.068941203  |
| 0.188554456 | -0.027379731 | 0.57124989  | -0.020242783 | 0.675519962 | -0.072536324 |
| 0.979977003 | -0.003119535 | 0.948572183 | -0.031387966 | 0.516247851 | -0.015865706 |
| 0.951823895 | 0.046789926  | 0.333063099 | 0.264004496  | 2.74E-08    | 0.119956686  |
| 0.54827241  | 0.141639821  | 0.003246192 | 0.181628053  | 0.000152539 | -0.016871411 |
| 0.943831458 | 0.033107055  | 0.493525774 | 0.037462551  | 0.438427866 | 0.05060234   |
| 0.129667376 | 0.064908268  | 0.179121252 | 0.243806258  | 3.08E-07    | 0.329836757  |
| 0.984530071 | -0.003842983 | 0.936668247 | 0.122843645  | 0.010785019 | 0.304879938  |
| 0.875379574 | 0.139274508  | 0.003806508 | 0.120266071  | 0.012571048 | 0.080698885  |
| 0.225634    | -0.03436709  | 0.47721642  | -0.240551498 | 4.47E-07    | -0.08107361  |
| 0.005011488 | 0.028052865  | 0.561821919 | -0.094967643 | 0.04906706  | -0.218211637 |
| 0.524654991 | 0.013156332  | 0.785596535 | 0.026081318  | 0.589644556 | -0.008317182 |
| 0.21001459  | 0.071673566  | 0.137852091 | 0.09545187   | 0.047918661 | 0.131129932  |
| 0.709915665 | 0.027375285  | 0.57131242  | -0.012359355 | 0.798296186 | -0.036434551 |
| 0.278482447 | 0.007472838  | 0.877206723 | -0.002195288 | 0.963796452 | 0.029055039  |
| 0.457342553 | 0.166752308  | 0.000516357 | 0.360816096  | 1.15E-14    | 0.229572478  |
| 0.661263729 | 0.03192881   | 0.509041432 | -0.250353797 | 1.44E-07    | -0.281100316 |
| 0.668005785 | -0.000217174 | 0.996417266 | 0.175258076  | 0.000260253 | 0.239927414  |
| 0.929829022 | -0.048101112 | 0.319678609 | 0.264880773  | 2.45E-08    | 0.365664033  |
| 0.35539168  | -0.080963523 | 0.093589043 | -0.058996926 | 0.222128117 | -0.003012172 |
| 0.460215214 | 0.011990976  | 0.804184473 | 0.203730941  | 2.07E-05    | 0.229565446  |
| 0.058385058 | 0.094025904  | 0.051366458 | 0.065796769  | 0.173230897 | 0.178937599  |
| 0.720602617 | 0.016992041  | 0.725322666 | 0.013036655  | 0.787500018 | -0.05397786  |
| 0.392405735 | 0.166803132  | 0.000514296 | -0.066287763 | 0.170038349 | -0.135004181 |
| 0.372341639 | 0.117740027  | 0.014569584 | 0.101345317  | 0.035655404 | 0.271341641  |
| 0.490378477 | 0.153045653  | 0.001456788 | 0.105817984  | 0.028230774 | 0.280220856  |
| 0.221482153 | 0.04398864   | 0.362847207 | -0.15901431  | 0.000936734 | -0.218948387 |
| 0.336812368 | 0.076648577  | 0.112483727 | 0.251354268  | 1.28E-07    | 0.316611548  |
| 0.008044537 | 0.024796233  | 0.608113796 | -0.169375538 | 0.000419438 | -0.266124963 |
| 0.502820487 | -0.086926475 | 0.071748822 | 0.101972015  | 0.03452427  | -0.04316677  |
| 0.066179181 | 0.129061018  | 0.007369002 | -0.061469487 | 0.203319362 | -0.005497573 |
| 0.643232283 | -0.004373578 | 0.927946404 | -0.007819072 | 0.871565554 | 0.00383295   |
| 0.846006441 | 0.024804215  | 0.607998286 | -0.049243186 | 0.308310166 | 0.014215131  |
| 0.970589658 | -0.024606579 | 0.610861121 | 0.036005315  | 0.456458982 | 0.032728559  |
| 0.004175453 | 0.15807558   | 0.001005133 | -0.144248798 | 0.002715839 | -0.300166016 |
| 0.620119802 | -0.013930636 | 0.773312346 | -0.030794415 | 0.524216787 | -0.084055776 |
| 0.709820365 | 0.011921878  | 0.8052902   | -0.023020858 | 0.634042892 | -0.156863599 |
| 0.031347655 | 0.041303221  | 0.392909247 | 0.140394812  | 0.00353103  | 0.277186804  |
| 0.290294018 | 0.012494325  | 0.796141631 | -0.089394514 | 0.064020421 | -0.016723721 |
| 1.33E-07    | 0.066844798  | 0.166469842 | 0.065824518  | 0.173049281 | -0.017787912 |
| 0.228335686 | 0.061914736  | 0.200058931 | -0.089869306 | 0.062615207 | -0.040795897 |
| 0.692784186 | 0.070853207  | 0.142427597 | -0.001980869 | 0.967330463 | 0.057218856  |
| 0.10811732  | 0.155173403  | 0.001246803 | 0.022366461  | 0.643716636 | -0.033284936 |
| 0.245119558 | 0.003406243  | 0.943853045 | 0.091103825  | 0.059080073 | 0.074704548  |
| 0.471715736 | 0.124212018  | 0.009931383 | 0.062742206  | 0.194100959 | 0.122320653  |
| 0.070008478 | 0.020585827  | 0.670341529 | 0.01364668   | 0.777810865 | -0.053659926 |
| 0.965587357 | 0.072614192  | 0.132745708 | 0.125319448  | 0.009285014 | 0.253844884  |
| 0.120578923 | 0.018774626  | 0.697853309 | -0.010880508 | 0.822000345 | 0.14060656   |
| 0.827013238 | 0.038297208  | 0.428286757 | 0.140395824  | 0.00353079  | 0.088024451  |
| 0.778070354 | 0.02238742   | 0.643405859 | 0.122312144  | 0.011133727 | 0.058895845  |
| 0.779843973 | 0.038908262  | 0.420949459 | -0.006311315 | 0.896175169 | 0.098215955  |

|              |               |              |               |              |               |
|--------------|---------------|--------------|---------------|--------------|---------------|
| 0. 581333961 | 0. 153349993  | 0. 001424884 | 0. 170717882  | 0. 000376667 | 0. 35313145   |
| 0. 763961348 | 0. 05384079   | 0. 265268604 | -0. 012973131 | 0. 788510897 | 0. 06264287   |
| 0. 97901828  | 0. 079611324  | 0. 099215714 | 0. 189357762  | 7. 78E-05    | 0. 070802284  |
| 0. 055621557 | 0. 051631069  | 0. 285411935 | -0. 022801347 | 0. 637281023 | 0. 046603033  |
| 0. 036453375 | 0. 11274377   | 0. 019358224 | -0. 095415945 | 0. 048003081 | -0. 232855603 |
| 0. 404864563 | 0. 094311768  | 0. 050659163 | 0. 14366855   | 0. 002826457 | 0. 096991397  |
| 0. 954474309 | -0. 146155109 | 0. 002379601 | -0. 166812754 | 0. 000513907 | -0. 122965014 |
| 0. 665420559 | 0. 108221132  | 0. 024820594 | 0. 007886595  | 0. 870466144 | -0. 113288277 |
| 0. 133850275 | 0. 157815496  | 0. 001024883 | 0. 129745979  | 0. 007059285 | 0. 209181291  |
| 0. 600753478 | -0. 00311856  | 0. 948588226 | 0. 145836313  | 0. 002433044 | 0. 060924686  |
| 0. 964809099 | 0. 096397291  | 0. 045741306 | 0. 144351707  | 0. 002696638 | 0. 050521052  |
| 0. 590372361 | 0. 082503431  | 0. 087495095 | 0. 315385979  | 2. 19E-11    | 0. 520076582  |
| 0. 050716476 | -0. 088901568 | 0. 065506719 | 0. 080383083  | 0. 095972271 | 0. 211618836  |
| 0. 101266527 | 0. 035696086  | 0. 460337971 | 0. 146490174  | 0. 002324586 | 0. 147406918  |
| 0. 75111062  | 0. 105670143  | 0. 028453108 | 0. 019343274  | 0. 689170868 | -0. 027010335 |
| 0. 370321889 | 0. 121318668  | 0. 011812374 | 0. 190478184  | 7. 04E-05    | 0. 053238618  |
| 0. 234369782 | -0. 029992191 | 0. 535086298 | -0. 064780381 | 0. 179981165 | -0. 300433229 |
| 0. 674173051 | -0. 050719629 | 0. 294013095 | 0. 145298427  | 0. 002525704 | 0. 151942022  |
| 0. 005375109 | 0. 014695739  | 0. 76122946  | -0. 041147137 | 0. 394701578 | 0. 02914259   |
| 0. 140438765 | 0. 033806882  | 0. 484430996 | 0. 045807293  | 0. 343326629 | 0. 102834878  |
| 0. 714391219 | 0. 074618714  | 0. 122351822 | 0. 115961076  | 0. 01613968  | 0. 118387925  |
| 0. 828850472 | 0. 06547832   | 0. 17532525  | 0. 04768826   | 0. 32385462  | 0. 090153067  |
| 0. 539759897 | 0. 162800521  | 0. 000702221 | 0. 089440487  | 0. 063883234 | 0. 202400578  |
| 0. 991305248 | 0. 005256477  | 0. 913453063 | -0. 012442748 | 0. 796964779 | 0. 002779856  |
| 0. 266423197 | 0. 076700512  | 0. 112239705 | -0. 092320435 | 0. 055759362 | -0. 138939577 |
| 0. 473346    | -0. 024240755 | 0. 616175868 | -0. 109318046 | 0. 02338614  | -0. 233774917 |
| 0. 4156378   | 0. 010281643  | 0. 831647016 | -0. 06055346  | 0. 210148068 | 0. 000222732  |
| 0. 562559584 | -0. 034384486 | 0. 476993332 | -0. 060201757 | 0. 212813374 | -0. 248473913 |
| 0. 771940094 | -0. 039564111 | 0. 413156691 | -0. 092865965 | 0. 054321477 | 0. 049451759  |
| 0. 367604915 | 0. 074467867  | 0. 123111255 | 0. 149407389  | 0. 001892435 | 0. 225625535  |
| 0. 674527691 | -0. 016810527 | 0. 728140325 | 0. 060077635  | 0. 213759784 | 0. 174282237  |
| 0. 086582463 | 0. 07342283   | 0. 128473609 | 0. 030529766  | 0. 527790078 | 0. 093876438  |
| 0. 856377528 | 0. 136915872  | 0. 004451058 | 0. 050265166  | 0. 298365871 | 0. 07617317   |
| 0. 01171349  | 0. 180404054  | 0. 000169269 | -0. 038167395 | 0. 429855001 | -0. 270337629 |
| 0. 252809059 | 0. 081011207  | 0. 093395382 | 0. 145270675  | 0. 00253057  | 0. 077439808  |
| 0. 731463609 | -0. 031921197 | 0. 509142512 | -0. 236552034 | 6. 99E-07    | -0. 218378817 |
| 0. 321526233 | -0. 046026849 | 0. 34101609  | 0. 023452029  | 0. 627702777 | 0. 055164926  |
| 0. 6019397   | 0. 139270271  | 0. 003807586 | 0. 061109651  | 0. 205982375 | 0. 056949915  |
| 0. 281436278 | 0. 00916848   | 0. 849644369 | -0. 194228362 | 5. 02E-05    | -0. 404721568 |
| 0. 663396491 | 0. 019868986  | 0. 681180107 | -0. 06035888  | 0. 211619659 | -0. 008200257 |
| 0. 897025906 | 0. 157220378  | 0. 001071427 | 0. 032099896  | 0. 506772806 | 0. 10868031   |
| 0. 950740941 | -0. 027744514 | 0. 566131399 | -0. 057761933 | 0. 231974321 | -0. 143798364 |
| 0. 703434351 | -0. 023741453 | 0. 623462238 | -0. 064545689 | 0. 181567172 | 0. 020064202  |
| 0. 751822475 | 0. 110454258  | 0. 021976463 | 0. 084223731  | 0. 081068913 | -0. 025399106 |
| 0. 027451755 | 0. 046153699  | 0. 339685699 | -0. 22835492  | 1. 71E-06    | -0. 331731156 |
| 0. 565314637 | 0. 080105026  | 0. 097130965 | 0. 001956341  | 0. 96773476  | -0. 091753696 |
| 0. 09793501  | 0. 137208568  | 0. 004366042 | -0. 072520337 | 0. 13324857  | -0. 104690854 |
| 0. 379455426 | 0. 109608412  | 0. 023018644 | -0. 018433792 | 0. 703076398 | -0. 052360424 |
| 0. 345142554 | 0. 0163627    | 0. 735107618 | -0. 041423101 | 0. 39153599  | -0. 021482196 |
| 0. 939150712 | 0. 031392425  | 0. 516188221 | -0. 30169616  | 1. 69E-10    | -0. 22986559  |
| 0. 035253297 | 0. 065803771  | 0. 173185055 | 0. 157805823  | 0. 001025624 | 0. 161358573  |



|             |              |             |              |             |              |
|-------------|--------------|-------------|--------------|-------------|--------------|
| 0.084115257 | 0.030289291  | 0.53104766  | 0.14180278   | 0.003210495 | 0.143841331  |
| 0.843736136 | -0.099328027 | 0.039512634 | 0.012241611  | 0.80017702  | 0.163100337  |
| 0.714430759 | 0.082367501  | 0.088019844 | 0.363021853  | 7.69E-15    | 0.209790126  |
| 0.18156093  | 0.08174482   | 0.090456079 | 0.258224995  | 5.59E-08    | 0.236830467  |
| 0.091253195 | 0.112064996  | 0.02010455  | 0.001587036  | 0.973823144 | 0.204906666  |
| 0.433665652 | 0.03841524   | 0.426863732 | -0.04997004  | 0.301215405 | -0.038305837 |
| 0.009418699 | 0.048258638  | 0.318094521 | 0.022201571  | 0.646163756 | 0.006297764  |
| 0.281944364 | 0.09464797   | 0.049837745 | -0.115141237 | 0.016911848 | -0.306344554 |
| 0.831533933 | 0.005533994  | 0.908903134 | 0.222974682  | 3.02E-06    | 0.310281901  |
| 0.603675993 | 0.013965187  | 0.772765493 | -0.222092328 | 3.32E-06    | -0.100788125 |
| 0.06531675  | 0.011671614  | 0.809298239 | 0.082648596  | 0.086937474 | 0.15811429   |
| 0.187693402 | 0.010821245  | 0.822953793 | 0.009608146  | 0.842526072 | -0.000676028 |
| 0.929423408 | 0.031338736  | 0.516906413 | -0.014399208 | 0.765905723 | 0.187670732  |
| 0.744524505 | -0.087659608 | 0.069377405 | 0.056704744  | 0.240645001 | 0.143383531  |
| 0.133699556 | -0.001238125 | 0.979576712 | -0.102991233 | 0.03274993  | -0.119842302 |
| 0.528212927 | -0.092325772 | 0.055745143 | -0.068245323 | 0.157745947 | 0.035623684  |
| 0.833888422 | 0.078540769  | 0.10385854  | -0.021724874 | 0.653259793 | -0.226822159 |
| 0.098643812 | 0.120494864  | 0.01240258  | 0.136298943  | 0.004635165 | 0.032315955  |
| 0.52002679  | -0.000996358 | 0.983564122 | -0.061815222 | 0.200784322 | -0.063563527 |
| 0.666373252 | 0.09455858   | 0.050055052 | 0.203919515  | 2.03E-05    | 0.328169998  |
| 0.910520192 | 0.031911314  | 0.509273733 | 0.02230087   | 0.644689598 | 0.063148387  |
| 0.001852558 | -0.08958691  | 0.063447902 | -0.157525965 | 0.001047289 | 0.067245621  |
| 0.883436285 | 0.158143394  | 0.001000042 | -0.006052957 | 0.900402766 | 0.096279976  |
| 0.468824369 | 0.032809777  | 0.497416517 | 0.063260003  | 0.19043933  | 0.209012433  |
| 0.747379308 | -0.015249756 | 0.752516035 | 0.224246877  | 2.65E-06    | 0.15471118   |
| 0.441065267 | -0.001872187 | 0.969121974 | -0.045004177 | 0.351863011 | 0.149873694  |
| 0.404008891 | -0.14559608  | 0.002474038 | -0.07228485  | 0.13451674  | -0.099338123 |
| 0.296997732 | -0.033871297 | 0.483598454 | -0.068707593 | 0.15494356  | 0.141622831  |
| 0.903757344 | -0.153356506 | 0.001424209 | -0.14509887  | 0.002560891 | -0.286618182 |
| 0.763303415 | -0.033146223 | 0.493014365 | -0.02236124  | 0.64379406  | 0.050078976  |
| 0.756618441 | -0.023503666 | 0.62694531  | 0.106043208  | 0.027894933 | 0.136973044  |
| 0.02904178  | 0.057902285  | 0.230840037 | 0.025668966  | 0.595542778 | 0.09370952   |
| 0.922900161 | -0.001613616 | 0.97338489  | 0.052484062  | 0.277517381 | 0.079435658  |
| 0.772896913 | 0.058678759  | 0.224635764 | 0.049016321  | 0.310546954 | 0.003749551  |
| 0.962277181 | -0.185174453 | 0.000112401 | -0.186131016 | 0.000103414 | -0.117928709 |
| 0.507290981 | 0.086369743  | 0.073593513 | 0.102889195  | 0.032923989 | -0.021771465 |
| 0.76443944  | 0.007161046  | 0.882292049 | 0.199677104  | 3.04E-05    | 0.210145636  |
| 0.437301715 | 0.227463796  | 1.88E-06    | 0.143694099  | 0.002821501 | -0.163623011 |
| 0.246535235 | 0.079643932  | 0.099076933 | -0.359743936 | 1.39E-14    | -0.261647241 |
| 0.159356876 | 0.032059072  | 0.507313652 | 0.115133135  | 0.016919638 | -0.015751359 |
| 0.906750805 | 0.017109352  | 0.723503586 | 0.02113947   | 0.662016912 | 0.182299939  |
| 0.053837342 | -0.020028505 | 0.678762415 | 0.014573713  | 0.763152757 | 0.032856582  |
| 0.003467475 | -0.011108401 | 0.818336338 | 0.183069188  | 0.000134831 | 0.396363016  |
| 0.578585085 | -0.106623601 | 0.027045261 | -0.182703337 | 0.000139134 | -0.161167094 |
| 0.085563369 | -0.076862598 | 0.111480801 | -0.029253047 | 0.545200367 | 0.156006972  |
| 0.343845327 | 0.016128525  | 0.738759625 | -0.113558512 | 0.018494351 | -0.214084238 |
| 0.702937145 | 0.129281083  | 0.007268197 | 0.1164747    | 0.01567181  | 0.152567423  |
| 0.300057466 | -0.09800044  | 0.042239122 | -0.21903381  | 4.55E-06    | -0.229929884 |
| 0.042492114 | 0.037751609  | 0.434900329 | -0.149278525 | 0.001909854 | -0.094338927 |
| 0.076109177 | 0.070209016  | 0.146101268 | 0.098823766  | 0.04053018  | 0.042798788  |
| 0.080669119 | 0.068443696  | 0.156538714 | -0.128568157 | 0.007599315 | -0.227691189 |

|             |              |             |              |             |              |
|-------------|--------------|-------------|--------------|-------------|--------------|
| 0.666306293 | 0.036208873  | 0.45391557  | -0.048879652 | 0.311899585 | -0.035265123 |
| 0.003882159 | 0.135753386  | 0.004803667 | 0.104349815  | 0.03050624  | 0.087724204  |
| 0.016533006 | -0.019456774 | 0.687442725 | -0.036346453 | 0.452201049 | 0.08147476   |
| 0.579298847 | 0.032325613  | 0.503787872 | -0.031400236 | 0.516083776 | -0.054571658 |
| 0.062382952 | -0.044662899 | 0.355530685 | -0.129605989 | 0.00712162  | 0.042535132  |
| 0.689483733 | -0.031182437 | 0.519000148 | 0.029729585  | 0.538668841 | 0.037433859  |
| 0.619343853 | 0.114556001  | 0.01748264  | 0.043470611  | 0.368531778 | -0.017453961 |
| 0.767774963 | -0.004591206 | 0.924371499 | 0.215992004  | 6.20E-06    | 0.159500239  |
| 0.310693625 | 0.006953741  | 0.885675892 | 0.022126996  | 0.64727177  | 0.288027327  |
| 0.127717405 | 0.108760124  | 0.024106525 | 0.214726616  | 7.05E-06    | 0.259155094  |
| 0.827341182 | 0.086215944  | 0.074109874 | -0.03266968  | 0.499255713 | -0.16032079  |
| 0.094458898 | 0.072139445  | 0.135304425 | -0.071761819 | 0.13736667  | -0.170856966 |
| 0.279774968 | 0.034577089  | 0.474527159 | 0.169221799  | 0.000424615 | 0.208442494  |
| 0.080749866 | 0.091314699  | 0.05849305  | 0.045962411  | 0.34169318  | 0.143165267  |
| 0.342042535 | -0.046429805 | 0.33680139  | -0.291039652 | 7.69E-10    | -0.181856489 |
| 0.08695586  | 0.002982297  | 0.950831719 | -0.128940558 | 0.007424709 | -0.061653199 |
| 0.174657519 | -0.086187847 | 0.074204524 | -0.162840851 | 0.000700045 | -0.020979831 |
| 0.801900005 | 0.046253619  | 0.338640081 | -0.212467236 | 8.84E-06    | -0.266625006 |
| 0.315803493 | -0.006241449 | 0.897318113 | -0.088447404 | 0.066901065 | -0.032317815 |
| 0.566894673 | 0.011111738  | 0.81828272  | -0.1015453   | 0.035291078 | -0.078845578 |
| 0.583457193 | 0.020724476  | 0.668252955 | 0.303900321  | 1.22E-10    | 0.405805512  |
| 0.055363601 | 0.087045431  | 0.071359605 | -0.120630643 | 0.012303546 | -0.181665779 |
| 0.034152    | -0.054962796 | 0.255423336 | -0.157159015 | 0.001076335 | -0.108151605 |
| 0.246872442 | -0.087741213 | 0.069117456 | -0.210496644 | 1.07E-05    | -0.255908718 |
| 0.575824972 | 0.077154444  | 0.110124526 | 0.088747483  | 0.065977081 | -0.112758506 |
| 0.025011415 | 0.035937251  | 0.457311208 | -0.125027268 | 0.009451812 | -0.205838852 |
| 0.011051843 | 0.117691775  | 0.014610333 | -0.049878907 | 0.302098958 | 0.006985194  |
| 0.000150314 | -0.006122086 | 0.899271297 | -0.086501714 | 0.073152779 | -0.282314741 |
| 0.70447736  | 0.004567583  | 0.924759479 | -0.043023086 | 0.373486883 | 0.033180829  |
| 0.054120601 | 0.063809776  | 0.186607332 | -0.196219443 | 4.19E-05    | -0.381488756 |
| 0.864397377 | -0.00249176  | 0.958911234 | -0.002417779 | 0.960130153 | 0.046129126  |
| 0.645877504 | -0.04125159  | 0.393501586 | -0.250577162 | 1.40E-07    | -0.361681323 |
| 0.5398562   | 0.026535051  | 0.583185618 | 0.184378756  | 0.000120431 | 0.174813818  |
| 0.98462505  | 0.109519175  | 0.02313105  | -0.010328144 | 0.830897041 | -0.078204917 |
| 0.753500038 | 0.153618744  | 0.001397246 | -0.018836372 | 0.696908608 | 0.062440832  |
| 0.626367057 | 0.08160307   | 0.091018161 | 0.0281835    | 0.560000949 | -0.321545426 |
| 0.796083531 | 0.210923372  | 1.03E-05    | 0.333558696  | 1.24E-12    | 0.376483189  |
| 0.993405129 | 0.029728303  | 0.538686367 | -0.239808229 | 4.86E-07    | -0.284962915 |
| 0.039741195 | -0.00302768  | 0.950084477 | -0.041768637 | 0.387594055 | 0.003985142  |
| 0.989930975 | 0.316907947  | 1.74E-11    | 0.024000787  | 0.619673109 | -0.090894985 |
| 0.622652647 | 0.014724049  | 0.760783456 | -0.073081024 | 0.130266222 | -0.233627583 |
| 0.02878945  | 0.004762604  | 0.921557075 | 0.090814511  | 0.059893373 | 0.13558744   |
| 0.057244595 | 0.036038715  | 0.45604111  | -0.163342833 | 0.000673482 | -0.287231904 |
| 0.24974144  | 0.018130437  | 0.707736925 | -0.157805431 | 0.001025654 | -0.146666803 |
| 0.034304882 | -0.064482529 | 0.181995752 | -0.167910906 | 0.000471235 | -0.262308585 |
| 0.464764696 | 0.080035084  | 0.097424167 | 0.371301784  | 1.67E-15    | 0.21142831   |
| 0.060727342 | 0.140366668  | 0.003537723 | 0.013664309  | 0.777531358 | -0.02635246  |
| 0.37787735  | 0.120624272  | 0.012308178 | -0.029186515 | 0.546115383 | -0.064287567 |
| 0.760895533 | 0.074821629  | 0.121336009 | 0.159217063  | 0.000922537 | 0.18698243   |
| 0.126107886 | 0.071530146  | 0.138643759 | -0.03327503  | 0.491334533 | -0.135349263 |
| 0.41812831  | 0.033258894  | 0.491544803 | 0.234001731  | 9.27E-07    | 0.082937861  |

|             |              |             |              |             |              |
|-------------|--------------|-------------|--------------|-------------|--------------|
| 0.011930661 | -0.019393712 | 0.688402699 | -0.010654862 | 0.825632043 | -0.003335365 |
| 0.997995139 | 0.055658397  | 0.249448318 | 0.156972642  | 0.001091371 | 0.128269827  |
| 0.709953286 | 0.087149178  | 0.07102156  | 0.136469932  | 0.004583461 | 0.107225377  |
| 0.019820709 | -0.10909416  | 0.023672953 | -0.157109962 | 0.001080274 | 0.037656505  |
| 0.232130582 | 0.009751814  | 0.840202801 | -0.021252296 | 0.660325489 | 0.006894785  |
| 0.001810151 | 0.02920277   | 0.545891761 | -0.043439553 | 0.368874338 | 0.021741495  |
| 0.379975249 | 0.137632416  | 0.004245531 | -0.035682093 | 0.460513927 | 0.103974371  |
| 0.074041373 | 0.012144313  | 0.801732122 | 0.037128192  | 0.442528602 | 0.105500539  |
| 0.3184305   | 0.039435585  | 0.414677083 | 0.094509084  | 0.050175715 | -0.075159948 |
| 0.27850909  | 0.00999961   | 0.836198935 | -0.039318294 | 0.416067445 | -0.016605685 |
| 0.563110212 | -0.033620159 | 0.486848709 | -0.036707493 | 0.447719185 | -0.071425914 |
| 0.843559675 | 0.027399755  | 0.570968352 | 0.017931254  | 0.710802999 | 0.168678507  |
| 0.562273797 | 0.036060552  | 0.455768018 | 0.439820789  | 9.09E-22    | 0.345800612  |
| 0.359002231 | -0.003179302 | 0.947588282 | -0.244677396 | 2.79E-07    | -0.319284108 |
| 0.26821556  | 0.094210134  | 0.050909693 | 0.088960622  | 0.065327183 | 0.093232017  |
| 0.54983327  | 0.132839757  | 0.005800657 | -0.021781388 | 0.652416883 | -0.272398411 |
| 0.034550255 | 0.009741136  | 0.840375428 | 0.083723284  | 0.082897677 | 0.215800465  |
| 0.232320966 | -0.05309846  | 0.271923729 | 0.129927878  | 0.006979018 | 0.196875393  |
| 0.136245867 | 0.048610209  | 0.314577613 | 0.1543814    | 0.001321475 | 0.070394333  |
| 0.46112849  | -0.025033044 | 0.604691073 | -0.142597758 | 0.003041412 | -0.094314975 |
| 0.048998283 | 0.160673644  | 0.00082624  | 0.046056632  | 0.340703427 | 0.22607842   |
| 0.008400361 | 0.002736289  | 0.95488308  | -0.034351945 | 0.477410699 | -0.051931746 |
| 0.12884323  | 0.037974999  | 0.432185392 | 0.013037212  | 0.787491165 | -0.03093521  |
| 0.774104346 | 0.021092373  | 0.662723467 | 0.064638491  | 0.180938797 | 0.000760437  |
| 0.881721708 | -0.020134942 | 0.677151072 | 0.051730529  | 0.284483706 | 0.00558367   |
| 0.430781038 | 0.024325017  | 0.614949906 | 0.02908553   | 0.54750567  | -0.070100791 |
| 0.551515641 | 0.041951715  | 0.385515265 | 0.296836045  | 3.40E-10    | 0.151235674  |
| 0.664896747 | -0.062557881 | 0.195416774 | -0.065542663 | 0.174900578 | -0.158544878 |
| 0.079471633 | 0.012924856  | 0.78927935  | -0.223260961 | 2.94E-06    | -0.315162628 |
| 0.625133518 | -0.008043929 | 0.867905439 | 0.09465328   | 0.04982486  | 0.105334657  |
| 9.98E-05    | 0.030951448  | 0.522102384 | 0.071595889  | 0.13828043  | -0.07371073  |
| 0.934827981 | -0.095906522 | 0.046860976 | -0.046826362 | 0.332686359 | -0.041664626 |
| 0.588143394 | -0.139665044 | 0.003708342 | 0.144784769  | 0.00261718  | 0.026882996  |
| 0.213203918 | -0.008332621 | 0.863210393 | 0.161079603  | 0.000801107 | 0.314083532  |
| 0.098082151 | 0.005836404  | 0.903948472 | 0.018975752  | 0.694777822 | -0.060493372 |
| 0.058124966 | -0.225175359 | 2.40E-06    | -0.137754443 | 0.004211397 | 0.024071003  |
| 0.002303002 | -0.061250547 | 0.204936666 | -0.032306536 | 0.50403979  | -0.098308339 |
| 0.995305779 | 0.015474248  | 0.748994144 | -0.120298891 | 0.012546758 | 0.017049709  |
| 0.085717233 | 0.061534852  | 0.202838317 | 0.087530919  | 0.069788961 | 0.164908016  |
| 0.882940723 | 0.04730189   | 0.327794706 | 0.132524195  | 0.005919096 | 0.113091801  |
| 0.016851708 | -0.048407786 | 0.316599407 | 0.120397787  | 0.012473816 | 0.243831482  |
| 0.149535528 | 0.039483606  | 0.41410863  | 0.003201745  | 0.947218829 | -0.229295754 |
| 0.541547494 | 0.01632165   | 0.735747377 | 0.077340361  | 0.109267322 | 0.190633603  |
| 0.256694277 | -0.088017534 | 0.068243165 | -0.057616454 | 0.233154196 | 0.048883274  |
| 0.092077426 | 0.048893115  | 0.311766165 | -0.020922131 | 0.665279948 | -0.103123079 |
| 0.637470873 | -0.005812536 | 0.904339389 | 0.135517023  | 0.004878371 | 0.155311219  |
| 0.016322059 | 0.044120833  | 0.361405402 | 0.032282757  | 0.5043539   | 0.188295118  |
| 0.206344396 | -0.038139776 | 0.430189088 | 0.052944528  | 0.273317898 | 0.15602223   |
| 0.002834987 | 0.106148012  | 0.027739829 | -0.140948649 | 0.003401634 | -0.296677905 |
| 0.885509667 | -0.177675812 | 0.000212943 | -0.135059069 | 0.005026096 | -0.148587265 |
| 0.012323869 | 0.147442919  | 0.002174436 | -0.015787756 | 0.744084468 | -0.072104563 |

|             |              |             |              |             |              |
|-------------|--------------|-------------|--------------|-------------|--------------|
| 0.21839233  | 0.091996827  | 0.056627147 | 0.014582691  | 0.763011191 | -0.046707624 |
| 0.820741549 | 0.033694524  | 0.485885047 | 0.059288664  | 0.219846379 | 0.072417902  |
| 0.512726873 | 0.032952993  | 0.495540089 | 0.192565339  | 5.84E-05    | 0.116885438  |
| 0.321490336 | -0.0148752   | 0.758403578 | 0.036702123  | 0.447785664 | 0.044606491  |
| 0.804756782 | -0.18036627  | 0.000169811 | -0.342224228 | 2.93E-13    | -0.353394535 |
| 0.0001322   | 0.008969891  | 0.852863607 | -0.100128705 | 0.037941374 | 0.201225389  |
| 0.731852739 | 0.014926098  | 0.757602701 | 0.320757543  | 9.57E-12    | 0.239531531  |
| 0.731213404 | 0.003593615  | 0.940769992 | 0.075278913  | 0.119070914 | -0.027724528 |
| 0.179719536 | -0.051228404 | 0.289190717 | 0.055577065  | 0.250141866 | 0.245513744  |
| 0.108135313 | -0.073486553 | 0.128141533 | 0.091790428  | 0.057186453 | 0.01000658   |
| 0.145986999 | -0.048214033 | 0.318542548 | -0.049948669 | 0.301422443 | 0.155887725  |
| 0.815581704 | 0.034943773  | 0.469851318 | 0.083994168  | 0.081903704 | 0.080423686  |
| 0.772471595 | 0.129631119  | 0.007110395 | 0.231738493  | 1.19E-06    | 0.146753369  |
| 0.016693767 | 0.001471365  | 0.975730445 | -0.027189685 | 0.57392522  | 0.256950163  |
| 0.242140323 | 0.282215483  | 2.58E-09    | 0.184194808  | 0.000122363 | 0.208124037  |
| 0.606575472 | 0.030068086  | 0.534053154 | 0.122075516  | 0.01129216  | 0.117614065  |
| 0.587772851 | 0.121658621  | 0.011576145 | 0.0250381    | 0.604618093 | -0.06001987  |
| 0.000424675 | 0.095772736  | 0.047170158 | 0.23685641   | 6.76E-07    | 0.149327343  |
| 0.324262602 | 0.04759117   | 0.324841812 | 0.269902393  | 1.30E-08    | 0.367067778  |
| 0.643499679 | 0.02594703   | 0.591562443 | 0.040713178  | 0.399710636 | -0.026129802 |
| 0.539255837 | 0.033661676  | 0.486310581 | 0.240665784  | 4.41E-07    | 0.265296953  |
| 0.574940425 | -0.033985274 | 0.482127227 | 0.071279326  | 0.140036651 | -0.036612723 |
| 0.140479822 | -0.001681935 | 0.972258475 | -0.284483643 | 1.90E-09    | -0.300224307 |
| 0.019162144 | 0.04123454   | 0.393697317 | 0.054646855  | 0.258169666 | 0.026574624  |
| 0.292769426 | -0.013518025 | 0.779851522 | -0.251964732 | 1.19E-07    | -0.38503207  |
| 0.157759307 | 0.071026134  | 0.141453564 | 0.217086428  | 5.55E-06    | 0.183530553  |
| 0.587141209 | 0.012196999  | 0.800889949 | 0.08159464   | 0.091051678 | 0.221715959  |
| 0.223219254 | 0.039418422  | 0.414880358 | -0.246468614 | 2.27E-07    | -0.254071396 |
| 0.285029514 | 0.001063871  | 0.982450593 | -0.066322758 | 0.169812493 | 0.023858238  |
| 0.899718851 | -0.036070077 | 0.455648931 | -0.178436515 | 0.000199809 | -0.225446429 |
| 0.021488993 | -0.022833407 | 0.636807652 | -0.122532105 | 0.010988223 | -0.124244586 |
| 0.433116099 | 0.075800261  | 0.116528921 | 0.100365395  | 0.037487157 | 0.08746586   |
| 0.781917583 | 0.053112094  | 0.271800479 | 0.039828677  | 0.410037383 | 0.224096461  |
| 0.336535372 | 0.187539429  | 9.14E-05    | -0.061132153 | 0.205815115 | -0.072266241 |
| 0.989733211 | 0.142656561  | 0.003029233 | 0.242175677  | 3.71E-07    | 0.133674341  |
| 0.227522429 | -0.032445998 | 0.502199659 | -0.051089467 | 0.290502317 | -0.001467072 |
| 0.317427463 | -0.043819087 | 0.36470174  | 0.084106487  | 0.081494399 | 0.066528374  |
| 0.95989271  | 0.074560063  | 0.122646664 | 0.309771336  | 5.13E-11    | 0.323868113  |
| 0.186298483 | 0.013995342  | 0.772288308 | 0.22611595   | 2.17E-06    | 0.346141117  |
| 0.431156811 | 0.153416839  | 0.001417963 | 0.295558547  | 4.07E-10    | 0.237487573  |
| 0.82263832  | -0.019595576 | 0.685331527 | 0.179696248  | 0.000179713 | 0.302399437  |
| 0.849574959 | 0.005299311  | 0.9127506   | 0.097532196  | 0.043237856 | 0.034889205  |
| 0.791316977 | 0.085429599  | 0.076796219 | 0.098948883  | 0.040275664 | 0.048010168  |
| 0.211707117 | 0.029983945  | 0.535198612 | 0.130178506  | 0.006869762 | 0.099482861  |
| 0.738304632 | -0.049966622 | 0.30124851  | 0.108422008  | 0.024552363 | 0.067405161  |
| 0.20042092  | -0.03768501  | 0.435711626 | -0.242152094 | 3.72E-07    | -0.375830998 |
| 0.754905128 | 0.138096141  | 0.004117132 | 0.013665212  | 0.777517049 | 0.05141482   |
| 0.542594093 | 0.112451895  | 0.019676137 | 0.177426804  | 0.000217415 | 0.166333635  |
| 0.442192811 | -0.007102794 | 0.883242689 | -0.010546669 | 0.827374702 | -0.012076168 |
| 0.025939303 | 0.070523061  | 0.144301417 | -0.075410834 | 0.118423635 | -0.272806395 |
| 0.478647855 | -0.04759708  | 0.324781665 | 0.047565238  | 0.325105818 | 0.040093114  |

|              |               |              |               |              |               |
|--------------|---------------|--------------|---------------|--------------|---------------|
| 0. 876062883 | 0. 147189233  | 0. 002213526 | 0. 077609442  | 0. 108035999 | 0. 228622055  |
| 0. 018262568 | 0. 082485085  | 0. 08756577  | 0. 236018103  | 7. 42E-07    | 0. 445120954  |
| 0. 62789677  | -0. 061808969 | 0. 200829969 | 0. 129572103  | 0. 007136783 | 0. 183050163  |
| 0. 165587663 | 0. 069889458  | 0. 147950243 | 0. 077699845  | 0. 107624779 | 0. 157497324  |
| 0. 595628009 | 0. 010887512  | 0. 821887682 | 0. 021099961  | 0. 662609607 | -0. 021407997 |
| 0. 281488298 | -0. 04011839  | 0. 406637638 | -0. 049032955 | 0. 310382583 | 0. 082346308  |
| 0. 743352283 | -0. 01494835  | 0. 75725265  | -0. 271680568 | 1. 03E-08    | -0. 271079016 |
| 0. 241454798 | 0. 043637944  | 0. 366689545 | 0. 117931464  | 0. 014408896 | 0. 070510584  |
| 0. 088611461 | -0. 084231691 | 0. 081040091 | 0. 007550328  | 0. 875943628 | 0. 11118056   |
| 0. 879768892 | 0. 088539495  | 0. 066616381 | 0. 168266093  | 0. 000458154 | 0. 098011917  |
| 0. 679350576 | 0. 163248022  | 0. 000678426 | 0. 22756531   | 1. 86E-06    | 0. 20209939   |
| 0. 501439662 | -0. 012208435 | 0. 80070718  | -0. 029135403 | 0. 54681883  | -0. 058684844 |
| 0. 629253653 | -0. 035208807 | 0. 466487537 | -0. 093764879 | 0. 052019471 | 0. 101941393  |
| 0. 151073468 | 0. 092614254  | 0. 05498105  | 0. 039769014  | 0. 410739598 | 0. 070031785  |
| 0. 000122924 | 0. 010269482  | 0. 831843165 | -0. 122519813 | 0. 010996309 | -0. 146404172 |
| 0. 816946844 | 0. 000882514  | 0. 98544186  | -0. 249711231 | 1. 55E-07    | -0. 248199223 |
| 0. 800171182 | -0. 091606723 | 0. 057688107 | -0. 094682345 | 0. 049754389 | -0. 054247777 |
| 0. 285360278 | 0. 007262066  | 0. 880643877 | 0. 22132604   | 3. 59E-06    | 0. 100845798  |
| 0. 606263882 | -0. 038628688 | 0. 424297308 | -0. 221685703 | 3. 46E-06    | -0. 119434954 |
| 0. 744989718 | -0. 038845458 | 0. 421700185 | -0. 023360419 | 0. 629047573 | -0. 025243435 |
| 0. 424720277 | -0. 043763849 | 0. 365307189 | -0. 072571233 | 0. 132975694 | -0. 141931416 |
| 0. 067889339 | -0. 007074493 | 0. 883704601 | -0. 294748563 | 4. 57E-10    | -0. 359374075 |
| 0. 321099317 | 0. 018546087  | 0. 701353979 | 0. 001202558  | 0. 980163285 | 0. 004953175  |
| 0. 893246885 | 0. 030392373  | 0. 529650018 | -0. 009328285 | 0. 847055631 | -0. 192971333 |
| 0. 376334347 | -0. 036182373 | 0. 454246223 | 0. 042158319  | 0. 383177537 | 0. 159882779  |
| 0. 752867949 | 0. 010956065  | 0. 820785128 | -0. 036210768 | 0. 45389193  | -0. 063818788 |
| 0. 266375759 | 0. 0789131    | 0. 10222467  | 0. 029739023  | 0. 538539883 | 0. 075571971  |
| 0. 360149239 | 0. 039701023  | 0. 411540709 | 0. 09409401   | 0. 051197204 | 0. 373611362  |
| 0. 185541128 | 0. 018975997  | 0. 694774089 | -0. 043676877 | 0. 366261741 | -0. 078052655 |
| 0. 040034951 | -0. 04364895  | 0. 366568582 | -0. 00673947  | 0. 889175639 | -0. 037192432 |
| 0. 067453939 | 0. 132656584  | 0. 005869145 | 0. 167079293  | 0. 000503232 | 0. 154245096  |
| 0. 764670613 | 0. 014789378  | 0. 759754577 | -0. 2160091   | 6. 19E-06    | -0. 090684702 |
| 0. 587145942 | 0. 082148522  | 0. 088870516 | 0. 03665778   | 0. 448334817 | 0. 237164794  |
| 0. 008846308 | 0. 071142673  | 0. 140800028 | -0. 058671494 | 0. 224693259 | -0. 081532297 |
| 0. 181282938 | 0. 016124733  | 0. 738818808 | 0. 017088567  | 0. 723825777 | -0. 09975968  |
| 0. 309829104 | 0. 033059872  | 0. 494142211 | -0. 076504533 | 0. 11316272  | 0. 004895478  |
| 0. 227070236 | 0. 09924769   | 0. 039673284 | -0. 139182002 | 0. 003830103 | -0. 160227017 |
| 0. 013372615 | 0. 029178262  | 0. 546228942 | 0. 125002221  | 0. 009466234 | 0. 373338807  |
| 0. 411655762 | 0. 086129778  | 0. 074400453 | 0. 121385268  | 0. 011765762 | 0. 075033086  |
| 0. 406355675 | 0. 113474659  | 0. 01858168  | -0. 03555487  | 0. 462115481 | -0. 146771655 |
| 0. 323124235 | 0. 007906259  | 0. 870146026 | -0. 060763423 | 0. 208568428 | -0. 234485828 |
| 0. 060962167 | -0. 112871155 | 0. 019220882 | -0. 010189566 | 0. 833132491 | 0. 175624996  |
| 0. 001529635 | -0. 024195368 | 0. 616836661 | 0. 134474004  | 0. 005220683 | 0. 001391592  |
| 0. 520500048 | 0. 012986078  | 0. 788304845 | -0. 211245509 | 9. 98E-06    | -0. 243031319 |
| 0. 233090743 | -0. 01650297  | 0. 732922937 | -0. 020124626 | 0. 677307173 | 0. 009143683  |
| 0. 482276008 | -0. 082844569 | 0. 086189225 | -0. 013494259 | 0. 78022864  | -0. 030581711 |
| 0. 023986385 | -0. 039364435 | 0. 415520169 | 0. 009809988  | 0. 83926246  | -0. 099377142 |
| 0. 362128774 | -0. 070303511 | 0. 145557908 | -0. 310840441 | 4. 37E-11    | -0. 230161098 |
| 0. 604108856 | 0. 07083313   | 0. 142541014 | 0. 081162371  | 0. 092783562 | 0. 156952529  |
| 0. 857745707 | 0. 025537499  | 0. 597428886 | 0. 205583951  | 1. 73E-05    | 0. 207333266  |
| 0. 531015573 | 0. 098200342  | 0. 041818708 | 0. 167631475  | 0. 000481769 | 0. 182825151  |

|             |              |             |              |             |              |
|-------------|--------------|-------------|--------------|-------------|--------------|
| 0.811039974 | -0.14376543  | 0.002807707 | -0.261487243 | 3.74E-08    | -0.240331327 |
| 0.157429619 | -0.0517693   | 0.284122423 | 0.160220676  | 0.000855142 | 0.373542548  |
| 0.009029507 | -0.051988007 | 0.282090208 | -0.122730627 | 0.010858348 | -0.248734015 |
| 0.297339975 | 0.129891939  | 0.006994812 | 0.046637372  | 0.334643442 | -0.076526104 |
| 0.096109611 | 0.074626905  | 0.122310686 | -0.004816229 | 0.920676721 | 0.009196515  |
| 0.249412078 | 0.09626787   | 0.046034373 | 0.053868406  | 0.265023198 | 0.018570157  |
| 0.583975086 | 0.0571478    | 0.236983915 | -0.022701284 | 0.638759405 | 0.035680825  |
| 0.664646009 | -0.12216013  | 0.011235279 | -0.191672889 | 6.33E-05    | -0.089012058 |
| 0.988447796 | 0.44509257   | 2.60E-22    | 0.058110232  | 0.229166701 | 0.054234633  |
| 0.724216837 | -0.030695589 | 0.525549696 | -0.10419822  | 0.030749894 | -0.368506428 |
| 0.169362816 | 0.056452903  | 0.242743645 | -0.281958784 | 2.67E-09    | -0.381155194 |
| 0.935006844 | -0.092131217 | 0.056265418 | -0.045899555 | 0.342354476 | -0.026317441 |
| 0.161604385 | 0.012384555  | 0.797893802 | 0.155464111  | 0.001220383 | 0.448213476  |
| 0.634225664 | 0.058116244  | 0.229118447 | 0.258017501  | 5.73E-08    | 0.05995084   |
| 0.771648579 | 0.165005269  | 0.000592034 | 0.064101833  | 0.184594884 | 0.152611645  |
| 0.394034778 | 0.099020203  | 0.040131189 | 0.010841214  | 0.822632491 | -0.314055796 |
| 0.022148212 | 0.039501267  | 0.413899684 | 0.009044606  | 0.851652149 | -0.015864347 |
| 0.314554096 | 0.171868146  | 0.000343285 | -0.002247023 | 0.962943865 | 0.22946728   |
| 0.768287887 | 0.006560237  | 0.892104742 | -0.099584975 | 0.039002505 | 0.000190155  |
| 0.749142516 | 0.105116882  | 0.029298534 | -0.075845903 | 0.116308421 | -0.059126978 |
| 0.257271068 | -0.051731026 | 0.284479075 | 0.035577973  | 0.461824412 | 0.011732355  |
| 0.085858414 | 0.077502966  | 0.108521923 | 0.10578799   | 0.02827576  | 0.216025915  |
| 0.629621991 | 0.030887933  | 0.522957073 | 0.222431096  | 3.20E-06    | 0.174474422  |
| 0.65081695  | 0.020334311  | 0.674136796 | 0.012867098  | 0.790199038 | 0.053067724  |
| 0.161005301 | 0.03133663   | 0.516934595 | 0.168302043  | 0.000456849 | 0.428608556  |
| 0.296922448 | -0.044949259 | 0.352451592 | -0.046077293 | 0.340486644 | -0.028820707 |
| 0.126774342 | -0.007258459 | 0.880702708 | -0.00079049  | 0.986959761 | -0.030057922 |
| 0.703483989 | 0.058029667  | 0.229813976 | 0.209830927  | 1.15E-05    | 0.072721213  |
| 0.739240895 | 0.123872344  | 0.01013749  | -0.089484032 | 0.063753513 | -0.012206336 |
| 0.293271935 | -0.023291303 | 0.63006299  | -0.148962321 | 0.00195322  | -0.089357895 |
| 0.165383506 | -0.054185016 | 0.262220814 | 0.06647322   | 0.168843973 | 0.238762046  |
| 0.936349224 | 0.013365919  | 0.782266076 | 0.112705279  | 0.01939989  | 0.044962886  |
| 0.879601476 | -0.063043661 | 0.191962996 | 0.144540089  | 0.002661808 | 0.015254449  |
| 0.355643869 | 0.066024801  | 0.171742677 | 0.178419651  | 0.000200092 | 0.163403884  |
| 0.051579521 | 0.024034426  | 0.619182332 | -0.142639407 | 0.003032781 | -0.274236412 |
| 0.432950383 | 0.041043046  | 0.395899613 | 0.147560585  | 0.00215652  | 0.025359046  |
| 0.017740667 | 0.026076173  | 0.589717984 | -0.152660801 | 0.001498071 | -0.214052782 |
| 0.042784745 | -0.022594772 | 0.640334636 | 0.061791825  | 0.200955147 | 0.222837562  |
| 0.706609876 | 0.0885694    | 0.066524149 | -0.078087132 | 0.105877062 | -0.33349506  |
| 0.927022176 | 0.010061246  | 0.835203673 | 0.054660553  | 0.258050173 | -0.003506322 |
| 0.559614012 | 0.03035506   | 0.530155717 | 0.021214827  | 0.660887009 | 0.048889282  |
| 0.222148576 | 0.043487778  | 0.368342513 | -0.022058732 | 0.648286699 | 0.150750281  |
| 0.535580839 | 0.098998895  | 0.040174308 | -0.139496791 | 0.00375035  | -0.143618696 |
| 0.145291804 | 0.08704809   | 0.071350927 | -0.06623799  | 0.170359973 | -0.114157838 |
| 0.360624493 | -0.000755938 | 0.987529709 | 0.049636266  | 0.304459776 | 0.09948522   |
| 0.778946942 | -0.019046067 | 0.693703795 | 0.187942972  | 8.82E-05    | 0.289286625  |
| 0.779434723 | -0.097697121 | 0.042883836 | -0.171827476 | 0.000344417 | -0.133385327 |
| 0.476068425 | 0.019545688  | 0.686090051 | 0.056655423  | 0.241055    | 0.070411033  |
| 0.886308526 | 0.235745564  | 7.65E-07    | 0.137204614  | 0.004367181 | 0.037968259  |
| 0.074074762 | 0.209077789  | 1.24E-05    | 0.033971683  | 0.482302523 | 0.035918115  |
| 0.080033158 | 0.273891034  | 7.75E-09    | 0.12050508   | 0.012395105 | 0.138061343  |

|              |               |              |               |              |               |
|--------------|---------------|--------------|---------------|--------------|---------------|
| 0. 676516098 | 0. 013915694  | 0. 773548881 | -0. 243739779 | 3. 11E-07    | -0. 153394948 |
| 0. 104532862 | 0. 066708636  | 0. 167336907 | -0. 011963523 | 0. 804623731 | -0. 075883016 |
| 0. 056598133 | -0. 061028209 | 0. 206588589 | -0. 091964898 | 0. 056713371 | 0. 047056748  |
| 0. 000116756 | 0. 052386933  | 0. 278408773 | -0. 04161434  | 0. 389351307 | -0. 18302278  |
| 0. 040064095 | 0. 027537609  | 0. 569031915 | 0. 001017269  | 0. 983219211 | -0. 011294724 |
| 0. 545203861 | 0. 165082896  | 0. 000588464 | 0. 025590047  | 0. 596674674 | 0. 030646465  |
| 0. 016845898 | -0. 045551948 | 0. 346026303 | 0. 132520738  | 0. 005920405 | 0. 440042138  |
| 0. 751114797 | 0. 033106432  | 0. 493533916 | -0. 049221179 | 0. 30852668  | -0. 066091995 |
| 0. 049023526 | -0. 056410392 | 0. 243099151 | 0. 029696528  | 0. 539120661 | 0. 291137334  |
| 0. 008353767 | 0. 115363558  | 0. 016699326 | 0. 142166761  | 0. 003132048 | 0. 194909443  |
| 0. 000329923 | 0. 078500519  | 0. 104036393 | -0. 046802046 | 0. 332937755 | -0. 278967741 |
| 0. 192322062 | 0. 134649958  | 0. 005161461 | -0. 028913149 | 0. 549882895 | 0. 095913007  |
| 0. 854254427 | 0. 107934458  | 0. 025207771 | -0. 015366774 | 0. 750679573 | -0. 268764676 |
| 0. 291322147 | -0. 020568928 | 0. 670596261 | 0. 011380446  | 0. 813967642 | 0. 192981422  |
| 0. 033005827 | -0. 010563593 | 0. 82710204  | -0. 14778353  | 0. 002122943 | -0. 360521784 |
| 0. 07162576  | 0. 022522253  | 0. 64140806  | -0. 145800488 | 0. 002439118 | -0. 357807617 |
| 0. 572266987 | -0. 059393392 | 0. 219031388 | -0. 149568057 | 0. 001870921 | -0. 032629149 |
| 0. 457355781 | -0. 127863326 | 0. 007939855 | 0. 275367285  | 6. 39E-09    | 0. 383128764  |
| 0. 626453137 | 0. 150671701  | 0. 001729084 | -0. 014897765 | 0. 758048492 | 0. 066140866  |
| 0. 590855964 | 0. 128547071  | 0. 00760931  | -0. 082250352 | 0. 08847412  | -0. 391986509 |
| 0. 930311939 | 0. 08484142   | 0. 078856861 | -0. 0264528   | 0. 584354038 | -0. 195102232 |
| 0. 012951212 | -0. 045404396 | 0. 347592443 | 0. 134329732  | 0. 005269697 | 0. 048725234  |
| 0. 494381216 | -0. 002139856 | 0. 964709999 | 0. 047276992  | 0. 328049665 | 0. 210572507  |
| 0. 500465524 | -0. 054913623 | 0. 255849443 | -0. 06207765  | 0. 198875512 | -0. 171844839 |
| 0. 100159106 | 0. 002714052  | 0. 95524935  | -0. 192249435 | 6. 01E-05    | -0. 204217678 |
| 0. 883798506 | 0. 014900861  | 0. 757999776 | 0. 157900224  | 0. 00101841  | 0. 225208064  |
| 0. 428593428 | 0. 077505847  | 0. 108508753 | 0. 066823207  | 0. 166607101 | 0. 004240831  |
| 0. 201549153 | 0. 019372413  | 0. 688727043 | 0. 031490444  | 0. 514878359 | 0. 064897815  |
| 0. 46606988  | 0. 336515672  | 7. 61E-13    | 0. 099420678  | 0. 039328043 | 0. 155589313  |
| 0. 104605406 | 0. 044401586  | 0. 358355167 | 0. 031269425  | 0. 517834349 | 0. 061156049  |
| 0. 282171115 | 0. 016205884  | 0. 737552542 | -0. 048220796 | 0. 31847459  | 0. 109460213  |
| 0. 886144578 | 0. 256467924  | 6. 92E-08    | 0. 104958627  | 0. 029544284 | 0. 04121558   |
| 0. 83296598  | -0. 046035863 | 0. 340921447 | 0. 033731459  | 0. 485406797 | 0. 117205467  |
| 0. 789254427 | -0. 05513384  | 0. 253945009 | 0. 160544891  | 0. 000834362 | 0. 059494792  |
| 0. 062604151 | 0. 034105878  | 0. 4805731   | 0. 152420346  | 0. 001524407 | 0. 241334683  |
| 0. 033387493 | -0. 069451474 | 0. 150513303 | 0. 224942022  | 2. 46E-06    | 0. 445610601  |
| 0. 054704997 | 0. 024145275  | 0. 617566331 | -0. 207542746 | 1. 43E-05    | -0. 301458505 |
| 0. 674692897 | -0. 046012069 | 0. 341171323 | -0. 027265295 | 0. 572860131 | 0. 006953017  |
| 0. 091338496 | 0. 024811347  | 0. 607895088 | -0. 095584713 | 0. 047607574 | -0. 121665927 |
| 0. 381229242 | 0. 006024236  | 0. 900872911 | 0. 225729966  | 2. 26E-06    | 0. 199885825  |
| 0. 692725186 | 0. 232779781  | 1. 06E-06    | 0. 09827123   | 0. 041670473 | 0. 177998124  |
| 0. 07100712  | 0. 197440864  | 3. 74E-05    | 0. 072161361  | 0. 135185475 | 0. 139856588  |
| 0. 294949291 | -0. 179819861 | 0. 000177846 | -0. 167239733 | 0. 000496906 | -0. 08313554  |
| 0. 656272098 | -0. 025686939 | 0. 59528513  | 0. 010283617  | 0. 831615174 | 0. 041785532  |
| 0. 093143276 | 0. 06092763   | 0. 207339022 | 0. 046252576  | 0. 33865098  | 0. 15453535   |
| 0. 979372708 | 0. 006039466  | 0. 900623599 | -0. 037543303 | 0. 437440761 | -0. 05947677  |
| 0. 162796407 | 0. 00994957   | 0. 837007132 | -0. 252677834 | 1. 09E-07    | -0. 223107295 |
| 0. 264519178 | -0. 018454853 | 0. 702753253 | -0. 202775449 | 2. 27E-05    | -0. 223111102 |
| 0. 699587982 | 0. 068833187  | 0. 154188725 | 0. 197006808  | 3. 89E-05    | 0. 110905583  |
| 0. 941271935 | -0. 009635711 | 0. 842080208 | -0. 254137878 | 9. 17E-08    | -0. 392177864 |
| 0. 004281732 | 0. 106558899  | 0. 027138866 | 0. 175103563  | 0. 000263588 | 0. 156911045  |

|             |              |             |              |             |              |
|-------------|--------------|-------------|--------------|-------------|--------------|
| 0.01291681  | -0.002243402 | 0.963003543 | -0.021810835 | 0.65197785  | 0.04399025   |
| 0.210673782 | 0.004777478  | 0.92131288  | 0.153875078  | 0.001371345 | -0.259453    |
| 0.581167049 | 0.05965082   | 0.217037278 | 0.115725185  | 0.016358626 | 0.148773562  |
| 0.453834811 | -0.17655394  | 0.000233795 | -0.131701728 | 0.006238061 | -0.159747783 |
| 0.015082788 | -0.05356832  | 0.267698242 | -0.110382796 | 0.022062903 | -0.285938178 |
| 0.183690574 | 0.077957663  | 0.106458805 | 0.185335657  | 0.000110837 | 0.291220946  |
| 0.756027694 | -0.140933405 | 0.003405137 | -0.056069288 | 0.245964959 | 0.133027223  |
| 0.184467894 | 0.18450827   | 0.000119088 | 0.095665357  | 0.047419548 | 0.143202455  |
| 0.372413563 | 0.176481672  | 0.000235202 | 0.2520485    | 1.18E-07    | 0.179921343  |
| 0.220142934 | 0.021144847  | 0.66193626  | 0.01330994   | 0.78315523  | 0.035280485  |
| 0.228368438 | -0.059411085 | 0.218893915 | -0.069898849 | 0.14789565  | -0.107011094 |
| 0.656402308 | 0.019911333  | 0.680537971 | 0.356289352  | 2.57E-14    | 0.411224743  |
| 0.997366093 | -0.029267026 | 0.54500822  | -0.105733323 | 0.02835791  | -0.157250699 |
| 0.638512925 | 0.108931383  | 0.023883384 | 0.056893971  | 0.239076543 | 0.018238777  |
| 0.332289003 | 0.006281235  | 0.896667218 | -0.021285485 | 0.659828279 | -0.108188611 |
| 0.000733466 | -0.130720584 | 0.006638674 | 0.088017398  | 0.068243592 | 0.217524639  |
| 0.432203902 | 0.130112084  | 0.006898567 | -0.008322565 | 0.863373846 | -0.018445983 |
| 0.925613281 | -0.055933168 | 0.247115143 | -0.095623151 | 0.047517876 | -0.221868223 |
| 0.699587151 | 0.061889965  | 0.200239317 | 0.35469553   | 3.41E-14    | 0.337332546  |
| 0.105193285 | -0.005057545 | 0.916716329 | -0.106954792 | 0.026570461 | -0.120779467 |
| 0.29824308  | -0.011135009 | 0.817908789 | -0.059643412 | 0.217094481 | -0.055872565 |
| 0.10976327  | 0.118707261  | 0.013773547 | 0.057266501  | 0.236009759 | 0.214499256  |
| 0.028398402 | -0.006724254 | 0.889424232 | -0.30111341  | 1.84E-10    | -0.455585458 |
| 0.181511845 | -0.179346231 | 0.000185098 | -0.219181364 | 4.48E-06    | -0.188317837 |
| 0.935956162 | 0.004065291  | 0.933013    | -0.041065524 | 0.395640715 | -0.128353834 |
| 0.305845218 | -0.005084779 | 0.916269504 | 0.143916401  | 0.002778715 | 0.073861545  |
| 0.467042211 | -0.031370416 | 0.516482569 | -0.002251192 | 0.962875163 | 0.073209604  |
| 0.01661905  | 0.071302754  | 0.13990609  | -0.20714321  | 1.49E-05    | -0.437916132 |
| 0.006685016 | 0.073381189  | 0.128690968 | -0.16851884  | 0.000449053 | -0.297463378 |
| 0.147166336 | 0.044185981  | 0.360696159 | -0.006151103 | 0.898796435 | 0.186541047  |
| 0.190277266 | 0.078155614  | 0.105570369 | -0.053895481 | 0.264782746 | -0.073337368 |
| 0.543874039 | 0.254048682  | 9.26E-08    | 0.357854121  | 1.95E-14    | 0.096446674  |
| 0.360794034 | -0.173494464 | 0.000300772 | -0.064761981 | 0.180105139 | 0.066738205  |
| 0.334028082 | 0.313605603  | 2.88E-11    | -0.020375432 | 0.673515728 | -0.078972531 |
| 0.820740908 | -0.018710342 | 0.698837346 | -0.009162084 | 0.849748005 | 0.175324643  |
| 0.107330902 | 0.095776133  | 0.047162287 | 0.2104018    | 1.08E-05    | 0.276344112  |
| 0.862626238 | -0.024777637 | 0.608382932 | -0.212283629 | 9.00E-06    | -0.011555502 |
| 0.367368547 | -0.046216981 | 0.339023235 | -0.04166322  | 0.388794102 | -0.027922522 |
| 0.482612171 | -0.020086877 | 0.677878543 | -0.00045713  | 0.992458783 | 0.100122424  |
| 0.068477996 | 0.008562491  | 0.859475406 | -0.005336895 | 0.912134295 | 0.106294272  |
| 0.071490905 | 0.026476652  | 0.584015093 | 0.367071379  | 3.67E-15    | 0.433412201  |
| 0.110521105 | -0.041188977 | 0.394220639 | -0.174701534 | 0.000272453 | -0.218020145 |
| 0.442115204 | 0.081690752  | 0.090670148 | 0.110665049  | 0.021723202 | 0.019347772  |
| 0.835544419 | 0.09313629   | 0.053620468 | -0.060945771 | 0.207203525 | 0.000425902  |
| 0.75207797  | 0.099029512  | 0.040112363 | -0.025427676 | 0.599006544 | -0.205749439 |
| 0.938186077 | -0.100353906 | 0.037509097 | -0.150479991 | 0.001752993 | -0.108977854 |
| 0.028356873 | 0.035372662  | 0.464414593 | 0.155950755  | 0.001177306 | 0.130784865  |
| 0.330291006 | 0.023750055  | 0.623336404 | -0.316105745 | 1.96E-11    | -0.36888073  |
| 0.65315595  | -0.040864401 | 0.397960803 | 0.093614268  | 0.052399398 | 0.235968948  |
| 0.006948169 | 0.084239985  | 0.081010068 | -0.194459898 | 4.92E-05    | -0.293897831 |
| 0.617318725 | 0.056410655  | 0.243096951 | 0.000155893  | 0.99742822  | -0.024447558 |



|              |               |              |               |              |               |
|--------------|---------------|--------------|---------------|--------------|---------------|
| 0. 560966007 | 0. 112661568  | 0. 019447303 | 0. 00447136   | 0. 926339996 | -0. 169005431 |
| 0. 04297976  | -0. 006907008 | 0. 886439006 | -0. 137918543 | 0. 004165886 | -0. 244800865 |
| 0. 51236905  | -0. 207790827 | 1. 40E-05    | -0. 152638084 | 0. 001500542 | -0. 168107533 |
| 0. 191162235 | -0. 044404329 | 0. 358325442 | 0. 055970363  | 0. 246800481 | -0. 008293514 |
| 0. 989965401 | 0. 059365331  | 0. 219249544 | 0. 044945771  | 0. 352488992 | -0. 003434513 |
| 0. 585291726 | -0. 018938297 | 0. 695350194 | -0. 007685742 | 0. 873737124 | 0. 127409639  |
| 0. 821516697 | 0. 083120286  | 0. 085145285 | 0. 189876487  | 7. 43E-05    | 0. 125744324  |
| 0. 530340079 | 0. 01805485   | 0. 708899908 | 0. 055956556  | 0. 246917253 | 0. 03630185   |
| 0. 125140042 | -0. 044529869 | 0. 356966823 | -0. 022901122 | 0. 635808328 | 0. 052269075  |
| 0. 602904808 | 0. 053174235  | 0. 271239221 | -0. 005519382 | 0. 909142618 | 0. 007687646  |
| 0. 856845508 | 0. 011850701  | 0. 806429601 | -0. 075774523 | 0. 116653411 | -0. 064353859 |
| 0. 847824014 | -0. 063680788 | 0. 187501259 | 0. 075208878  | 0. 119415665 | 0. 233323833  |
| 0. 382056745 | 0. 02374097   | 0. 623469313 | -0. 044039525 | 0. 362291792 | -0. 189955133 |
| 0. 670070299 | 0. 061859174  | 0. 200463705 | -0. 196843399 | 3. 95E-05    | -0. 263608772 |
| 0. 011272535 | -0. 041932579 | 0. 385732234 | -0. 20082031  | 2. 73E-05    | -0. 279298629 |
| 0. 89357975  | -0. 020065142 | 0. 678207596 | -0. 196626496 | 4. 03E-05    | -0. 338968359 |
| 0. 337236156 | 0. 122896611  | 0. 010750805 | -0. 046141987 | 0. 33980839  | 0. 105822745  |
| 0. 013540442 | -0. 076168823 | 0. 11475766  | -0. 08852341  | 0. 066666033 | -0. 1910388   |
| 0. 974372796 | -0. 02256185  | 0. 640821856 | 0. 024103335  | 0. 61817754  | 0. 053880464  |
| 0. 698891419 | 0. 031487437  | 0. 514918516 | -0. 00103669  | 0. 982898906 | -0. 037590656 |
| 0. 18491992  | 0. 03820272   | 0. 42942792  | -0. 017752808 | 0. 713553812 | 0. 014646934  |
| 0. 14400847  | -0. 173586403 | 0. 000298522 | -0. 260290062 | 4. 34E-08    | -0. 193251016 |
| 0. 481504601 | 0. 036234809  | 0. 45359208  | -0. 118965597 | 0. 01356752  | -0. 048317725 |
| 0. 098347348 | -0. 046210249 | 0. 339093674 | -0. 05975688  | 0. 216219504 | 0. 123233983  |
| 0. 810801368 | -0. 036484662 | 0. 450482388 | -0. 10491822  | 0. 029607314 | 0. 01667399   |
| 0. 36036327  | -0. 135336745 | 0. 00493605  | -0. 002633568 | 0. 956575078 | -0. 0528154   |
| 0. 743745905 | 0. 007216189  | 0. 881392318 | -0. 013633739 | 0. 778016062 | -0. 071149376 |
| 0. 358104063 | -0. 006100388 | 0. 899626415 | 0. 076915078  | 0. 111235951 | 0. 210298029  |
| 0. 179157736 | 0. 177774953  | 0. 000211187 | 0. 004947059  | 0. 918529338 | -0. 217670767 |
| 0. 29587209  | 0. 079102017  | 0. 101403488 | 0. 045725088  | 0. 344194279 | 0. 048532831  |
| 0. 29686806  | 0. 082899502  | 0. 085980414 | -0. 016437221 | 0. 733946695 | -0. 183424739 |
| 0. 738540771 | 0. 048439435  | 0. 316282744 | 0. 234277781  | 8. 99E-07    | 0. 048689025  |
| 0. 003363788 | 0. 121984609  | 0. 011353554 | -0. 004764202 | 0. 921530843 | -0. 205136444 |
| 0. 544386549 | 0. 011378582  | 0. 813997559 | -0. 021480242 | 0. 656913562 | -0. 007668667 |
| 0. 820501354 | 0. 125653272  | 0. 009097651 | -0. 015023029 | 0. 75607821  | -0. 151397706 |
| 0. 572278523 | 0. 137164275  | 0. 004378813 | -0. 135712178 | 0. 004816616 | -0. 073430625 |
| 0. 645279031 | -0. 083529234 | 0. 08361569  | -0. 222208076 | 3. 28E-06    | -0. 34731303  |
| 0. 029709671 | 0. 019688107  | 0. 683925476 | 0. 051087148  | 0. 290524236 | -0. 070250713 |
| 0. 902782604 | 0. 044324112  | 0. 359195262 | 0. 002821131  | 0. 953485734 | -0. 009699514 |
| 0. 36870077  | 0. 100714983  | 0. 036824723 | 0. 091182054  | 0. 058861736 | -0. 148066078 |
| 0. 891083381 | -0. 016938592 | 0. 726151979 | -0. 03477814  | 0. 471960264 | -0. 050250746 |
| 0. 346443059 | -0. 005751268 | 0. 90534297  | -0. 186660558 | 9. 87E-05    | -0. 271372665 |
| 0. 61154157  | 0. 033601382  | 0. 487092202 | 0. 121108045  | 0. 011960862 | 0. 17770596   |
| 0. 124222881 | 0. 15627908   | 0. 001149039 | 0. 250678393  | 1. 38E-07    | 0. 155022084  |
| 0. 449799011 | 0. 015673616  | 0. 745870763 | 0. 151443946  | 0. 001635773 | 0. 153670092  |
| 0. 950535209 | 0. 066361733  | 0. 169561221 | 0. 138928638  | 0. 003895405 | 0. 230116224  |
| 0. 383654842 | -0. 00128509  | 0. 978802197 | -0. 031512658 | 0. 514581737 | -0. 037028252 |
| 0. 192052169 | 0. 037847897  | 0. 433728911 | 0. 197123667  | 3. 85E-05    | 0. 172440759  |
| 0. 628691918 | -0. 103195644 | 0. 032403603 | 0. 237961745  | 5. 98E-07    | 0. 305839348  |
| 0. 992183522 | -0. 026116662 | 0. 589140255 | -0. 064522918 | 0. 181721603 | -0. 016494969 |
| 0. 617063217 | -0. 02389186  | 0. 62126342  | 0. 096267473  | 0. 046035273 | 0. 071424519  |

|              |               |              |               |              |               |
|--------------|---------------|--------------|---------------|--------------|---------------|
| 0. 078723409 | -0. 095618016 | 0. 04752985  | -0. 104576243 | 0. 030145385 | 0. 009345167  |
| 0. 984089232 | 0. 007285608  | 0. 880259844 | 0. 275865536  | 5. 99E-09    | 0. 297130952  |
| 0. 845785257 | -0. 019657877 | 0. 684384719 | 0. 058020713  | 0. 229885998 | 0. 094913295  |
| 0. 19634266  | 0. 010204429  | 0. 832892661 | -0. 090125719 | 0. 061866949 | -0. 278535474 |
| 0. 072031285 | 0. 077517638  | 0. 108454861 | 0. 37828326   | 4. 46E-16    | 0. 276337164  |
| 0. 917529618 | 0. 11533807   | 0. 016723571 | 0. 009884496  | 0. 838058421 | -0. 101308737 |
| 0. 412621449 | 0. 106061463  | 0. 027867864 | 0. 010041637  | 0. 835520276 | 0. 055731578  |
| 0. 403488217 | 0. 01034049   | 0. 830697937 | 0. 070813103  | 0. 142654218 | 0. 161878781  |
| 0. 004048701 | 0. 134005746  | 0. 005381279 | 0. 144330399  | 0. 002700603 | 0. 37660168   |
| 0. 932072136 | 0. 017149316  | 0. 722884244 | 0. 136652962  | 0. 004528694 | 0. 07980314   |
| 0. 046824432 | 0. 296129743  | 3. 76E-10    | 0. 178536848  | 0. 000198134 | 0. 091321115  |
| 0. 748953492 | -0. 142361614 | 0. 003090772 | 0. 047100595  | 0. 329859685 | 0. 209236381  |
| 0. 007519519 | -0. 02884987  | 0. 550756829 | -0. 09897081  | 0. 040231199 | -0. 067520081 |
| 0. 173914346 | -0. 045473583 | 0. 346857519 | -0. 000447955 | 0. 992610131 | -0. 074109253 |
| 0. 242539929 | 0. 065248311  | 0. 176849632 | 0. 32594659   | 4. 23E-12    | 0. 167898338  |
| 0. 030431978 | -0. 030958467 | 0. 522007988 | -0. 151253511 | 0. 001658345 | -0. 193281736 |
| 0. 165821234 | 0. 209838809  | 1. 15E-05    | 0. 06879504   | 0. 1544177   | 0. 080304703  |
| 0. 971405662 | 0. 06554053   | 0. 174914644 | -0. 042983812 | 0. 373923681 | 0. 034882989  |
| 0. 001699489 | 0. 095235203  | 0. 048429698 | -0. 065689058 | 0. 173937184 | -0. 063274563 |
| 0. 532251289 | -0. 032561091 | 0. 50068375  | 0. 054789757  | 0. 256924966 | -0. 102043775 |
| 0. 001711173 | 0. 060819964  | 0. 20814452  | 0. 231728839  | 1. 19E-06    | 0. 045965533  |
| 0. 616769994 | 0. 241754447  | 3. 90E-07    | -0. 052077298 | 0. 281263351 | -0. 210802137 |
| 0. 941530837 | -0. 125504658 | 0. 009180643 | 0. 19724034   | 3. 81E-05    | 0. 294279717  |
| 0. 007806432 | -0. 020480637 | 0. 671927792 | -0. 115740173 | 0. 016344637 | -0. 249777092 |
| 0. 064279245 | 0. 010332957  | 0. 830819411 | 0. 089662375  | 0. 063224493 | 0. 287498748  |
| 0. 327425589 | 0. 073626364  | 0. 12741528  | 0. 124220832  | 0. 009926085 | -0. 013410761 |
| 0. 051106396 | 0. 082315744  | 0. 088220314 | 0. 032166073  | 0. 505896709 | 0. 03956351   |
| 0. 98762368  | 0. 127954617  | 0. 007894993 | 0. 069547749  | 0. 149947037 | 0. 178846933  |
| 0. 831828656 | 0. 090334042  | 0. 061264469 | 0. 189603841  | 7. 61E-05    | 0. 247093677  |
| 0. 509194899 | -0. 042582449 | 0. 378405666 | 0. 015928242  | 0. 741887755 | 0. 02313128   |
| 0. 735436456 | -0. 047323564 | 0. 327572867 | -0. 219808045 | 4. 20E-06    | -0. 362936401 |
| 0. 273302467 | -0. 040435374 | 0. 402937138 | 0. 086326156  | 0. 073739554 | 0. 086723098  |
| 0. 646080753 | 0. 172727024  | 0. 000320181 | 0. 0977558    | 0. 042758469 | -0. 024575692 |
| 0. 059374862 | 0. 053667645  | 0. 266810793 | -0. 011419906 | 0. 813334439 | -0. 078809154 |
| 0. 868117478 | 0. 068640101  | 0. 155350346 | 0. 037003877  | 0. 444058822 | 0. 079617012  |
| 0. 667316167 | 0. 129252174  | 0. 007281368 | 0. 167800829  | 0. 000475359 | 0. 228814139  |
| 0. 236087974 | 0. 06102793   | 0. 20659067  | 0. 223601087  | 2. 83E-06    | 0. 234889389  |
| 5. 58E-06    | -0. 004811625 | 0. 920752301 | 0. 29500697   | 4. 40E-10    | 0. 102618529  |
| 0. 020136223 | 0. 054664435  | 0. 258016318 | 0. 225596393  | 2. 30E-06    | 0. 07965669   |
| 0. 876029156 | 0. 149158542  | 0. 001926204 | 0. 200152007  | 2. 91E-05    | 0. 045669509  |
| 0. 328700809 | 0. 101248823  | 0. 035832336 | 0. 150689704  | 0. 001726855 | 0. 127256597  |
| 0. 816658193 | 0. 058221726  | 0. 22827307  | 0. 005135097  | 0. 915443999 | 0. 053045116  |
| 0. 698507814 | 0. 066649677  | 0. 167713394 | 0. 058247739  | 0. 22806493  | -0. 063733246 |
| 0. 468855886 | -0. 091570479 | 0. 057787509 | 0. 015172668  | 0. 753726592 | 0. 072438682  |
| 0. 33465095  | 0. 051923323  | 0. 282690227 | -0. 048922337 | 0. 311476711 | -0. 045154504 |
| 0. 547239444 | -0. 024288769 | 0. 615477158 | 0. 284334011  | 1. 93E-09    | 0. 256587211  |
| 0. 218063357 | -0. 006999358 | 0. 884931117 | -0. 146354467 | 0. 002346726 | -0. 255844419 |
| 0. 237769988 | -0. 101576075 | 0. 035235295 | -0. 05550699  | 0. 250740501 | -0. 001267068 |
| 0. 10205439  | 0. 008703285  | 0. 857189284 | 0. 014850822  | 0. 758787257 | 0. 060091159  |
| 0. 953287398 | 0. 022768731  | 0. 637762739 | 0. 049795061  | 0. 302913371 | 0. 045569709  |
| 0. 024237176 | -0. 042680593 | 0. 377306664 | -0. 24700059  | 2. 13E-07    | -0. 363720669 |

|              |               |              |               |              |               |
|--------------|---------------|--------------|---------------|--------------|---------------|
| 0. 824381088 | 0. 010064787  | 0. 835146511 | -0. 022302945 | 0. 644658814 | -0. 01733045  |
| 0. 740731866 | -0. 020336795 | 0. 674099264 | -0. 138329967 | 0. 00405373  | -0. 142545858 |
| 0. 122314186 | 0. 062953971  | 0. 192597278 | -0. 129286899 | 0. 007265549 | -0. 088969386 |
| 0. 301635747 | -0. 02445379  | 0. 6130784   | -0. 093519553 | 0. 052639505 | 0. 019507962  |
| 0. 404998838 | 0. 190226541  | 7. 20E-05    | -0. 042146709 | 0. 383308672 | 0. 043486717  |
| 0. 403311891 | -0. 083169218 | 0. 084961085 | -0. 192656928 | 5. 79E-05    | -0. 129341547 |
| 0. 43332041  | 0. 071320675  | 0. 13980629  | 0. 240151897  | 4. 67E-07    | 0. 297011198  |
| 0. 297282335 | 0. 141829725  | 0. 003204627 | 0. 09606292   | 0. 046501691 | 0. 185961407  |
| 0. 640411726 | -0. 024224727 | 0. 616409186 | 0. 061947195  | 0. 199822739 | 0. 068580394  |
| 0. 282295615 | 0. 094148674  | 0. 051061693 | 0. 057802221  | 0. 23164832  | -0. 14421747  |
| 0. 415250656 | 0. 095140113  | 0. 048655418 | -0. 033699226 | 0. 485824141 | 0. 003722794  |
| 0. 217169439 | 0. 017165953  | 0. 722626475 | -0. 245043795 | 2. 67E-07    | -0. 292537681 |
| 0. 021214773 | 0. 022007243  | 0. 649052659 | 0. 051690613  | 0. 28485598  | -0. 164556666 |
| 0. 340396257 | -0. 032205659 | 0. 505373012 | 0. 004595362  | 0. 924303247 | -0. 069761591 |
| 0. 000869438 | 0. 022869528  | 0. 636274506 | -0. 166574512 | 0. 000523627 | -0. 358295526 |
| 0. 091839484 | -0. 034085225 | 0. 480839039 | 0. 13086731   | 0. 006577335 | 0. 136136473  |
| 0. 710414765 | 0. 081026465  | 0. 093333479 | 0. 011438123  | 0. 813042154 | -0. 071009656 |
| 0. 774468796 | 0. 062141287  | 0. 198414638 | 0. 119726465  | 0. 012976397 | 0. 17736996   |
| 0. 688199236 | -0. 025734614 | 0. 594601971 | 0. 086929279  | 0. 071739628 | 0. 06406144   |
| 0. 384413143 | 0. 07049413   | 0. 144466511 | -0. 051712459 | 0. 284652199 | -0. 146893724 |
| 0. 078137038 | 0. 095833064  | 0. 047030528 | 0. 096282878  | 0. 046000308 | 0. 022126552  |
| 0. 617195289 | 0. 126166615  | 0. 00881609  | 0. 081581524  | 0. 091103844 | -0. 025624214 |
| 0. 292191207 | -0. 064208962 | 0. 183860729 | 0. 147400321  | 0. 002180955 | 0. 211351043  |
| 0. 206945692 | 0. 02408476   | 0. 618448315 | -0. 270560577 | 1. 19E-08    | -0. 341019729 |
| 0. 79576164  | 0. 08493927   | 0. 078510976 | 0. 127617429  | 0. 008061826 | 0. 204406088  |
| 0. 120061056 | 0. 067049161  | 0. 1651748   | 0. 237529042  | 6. 27E-07    | 0. 093587249  |
| 0. 037529014 | 0. 093843558  | 0. 051821914 | -0. 028140186 | 0. 560604406 | 0. 132407349  |
| 0. 911770462 | 0. 02907187   | 0. 547693859 | -0. 001007298 | 0. 98338367  | 0. 010559447  |
| 0. 231290182 | 0. 289801812  | 9. 13E-10    | 0. 048667267  | 0. 314009259 | 0. 087185794  |
| 0. 000334811 | -0. 060981362 | 0. 206937873 | 0. 070946507  | 0. 141901438 | 0. 209525078  |
| 0. 975385853 | 0. 237603362  | 6. 22E-07    | -0. 025828694 | 0. 593254874 | -0. 123404916 |
| 0. 456138161 | 0. 013506422  | 0. 780035627 | 0. 127005751  | 0. 008372515 | 0. 111203343  |
| 0. 431726463 | 0. 055753556  | 0. 248638559 | 0. 01832613   | 0. 704729188 | -0. 048270749 |
| 0. 164669595 | -0. 026383392 | 0. 585340849 | 0. 036777172  | 0. 44685711  | 0. 059157487  |
| 0. 174773758 | 0. 079534013  | 0. 099545375 | -0. 241287048 | 4. 11E-07    | -0. 340648426 |
| 0. 431151955 | 0. 071359256  | 0. 13959161  | 0. 017510147  | 0. 717300502 | 0. 156156432  |
| 0. 176964062 | -0. 040681762 | 0. 400074725 | -0. 104345999 | 0. 030512352 | -0. 048024802 |
| 0. 719824204 | 0. 014183895  | 0. 769306523 | -0. 24832078  | 1. 83E-07    | 0. 009203626  |
| 0. 155504849 | 0. 012232678  | 0. 800319764 | -0. 086299031 | 0. 073830556 | -0. 159383974 |
| 0. 392677553 | 0. 086486037  | 0. 073205023 | -0. 131012519 | 0. 00651713  | -0. 245857403 |
| 0. 284736202 | -0. 013098323 | 0. 786519027 | 0. 043042114  | 0. 373275365 | 0. 095201656  |
| 0. 155024947 | 0. 058541549  | 0. 225723389 | -0. 110588971 | 0. 021814315 | -0. 149396728 |
| 0. 500662777 | -0. 026058216 | 0. 589974297 | -0. 049934827 | 0. 301556591 | -0. 046054326 |
| 0. 776513584 | 0. 095602396  | 0. 047566291 | -0. 111709098 | 0. 020505777 | -0. 189523263 |
| 0. 150665705 | -0. 069705189 | 0. 149024495 | -0. 190204119 | 7. 22E-05    | -0. 247591408 |
| 0. 347339867 | 0. 069124377  | 0. 152449363 | -0. 251090108 | 1. 32E-07    | -0. 361824673 |
| 0. 933237447 | 0. 009125352  | 0. 850343285 | 0. 066715562  | 0. 167292716 | -0. 027025275 |
| 0. 510466165 | -0. 007632769 | 0. 874600181 | 0. 025518699  | 0. 597698811 | -0. 06928055  |
| 0. 701493848 | 0. 060117316  | 0. 213456891 | 0. 253103631  | 1. 04E-07    | 0. 136539135  |
| 0. 212933735 | 0. 101523201  | 0. 035331181 | 0. 238228003  | 5. 80E-07    | 0. 238223106  |
| 0. 084142026 | 0. 084802635  | 0. 078994302 | -0. 021885445 | 0. 650866026 | -0. 023341717 |

|             |              |             |              |             |              |
|-------------|--------------|-------------|--------------|-------------|--------------|
| 0.22896335  | 0.113847277  | 0.018196345 | 0.288004737  | 1.17E-09    | 0.220709266  |
| 0.986220329 | -0.005620013 | 0.907493443 | 0.004544642  | 0.925136267 | 0.054500507  |
| 0.158066726 | 0.161922668  | 0.000751157 | 0.093492878  | 0.052707291 | 0.34091412   |
| 0.979747565 | 0.045049791  | 0.35137462  | 0.098629698  | 0.040927647 | 0.139755657  |
| 0.354985806 | 0.071101789  | 0.141029039 | -0.015851205 | 0.743092085 | 0.20738454   |
| 0.946074162 | -0.007484934 | 0.877009526 | 0.154052472  | 0.001353679 | 0.141505505  |
| 0.178379836 | 0.494345413  | 7.02E-28    | 0.040624864  | 0.400734655 | 0.18668444   |
| 0.618683637 | 0.140326628  | 0.003547265 | 0.187208101  | 9.41E-05    | 0.297352749  |
| 0.097234529 | 0.049253148  | 0.308212186 | -0.160145662 | 0.000860017 | -0.247938324 |
| 0.043529735 | -0.022335842 | 0.644170753 | -0.0698303   | 0.148294477 | -0.20602285  |
| 0.455518491 | 0.008430352  | 0.861622051 | 0.027560438  | 0.568711542 | 0.027724217  |
| 0.708566944 | 0.077721797  | 0.107525109 | -0.121236109 | 0.011870383 | -0.084075836 |
| 0.165720483 | -0.048288749 | 0.317792302 | -0.001674603 | 0.972379364 | -0.058476837 |
| 0.912691107 | -0.017837601 | 0.712246224 | 0.036044828  | 0.455964658 | 0.173032782  |
| 0.608850391 | 0.013641587  | 0.777891618 | 0.17023422   | 0.000391586 | 0.167000324  |
| 0.395591136 | 0.03854279   | 0.425329031 | 0.144386067  | 0.002690254 | 0.221264855  |
| 0.169311758 | -0.024655039 | 0.6101586   | 0.022871162  | 0.636250387 | 0.021181927  |
| 0.352148881 | 0.111023968  | 0.021297791 | 0.21105209   | 1.02E-05    | 0.208906564  |
| 0.134764197 | 0.004939475  | 0.918653796 | -0.118093642 | 0.014273989 | -0.123390162 |
| 0.143972438 | 0.15367193   | 0.001391835 | 0.195450847  | 4.49E-05    | 0.091265389  |
| 0.503571284 | 0.05107457   | 0.290643179 | 0.144786567  | 0.002616855 | 0.159139425  |
| 0.013071184 | 0.070743905  | 0.143045889 | -0.015915922 | 0.74208031  | -0.132190855 |
| 0.783795624 | -0.027055855 | 0.575812714 | 0.113548636  | 0.018504617 | 0.339484588  |
| 0.175454976 | 0.126698375  | 0.008532634 | 0.07326358   | 0.129306407 | -0.020426836 |
| 0.202201756 | -0.042121338 | 0.383595336 | 0.026733628  | 0.580369235 | 0.008568225  |
| 0.254315454 | 0.017428846  | 0.718557303 | 0.021644786  | 0.654455067 | 0.028107957  |
| 0.684667058 | -0.060124838 | 0.213399511 | -0.114438442 | 0.017599305 | -0.228780063 |
| 0.250441921 | 0.030397462  | 0.529581066 | -0.133934031 | 0.005406264 | 0.045124446  |
| 0.205537    | -0.064765532 | 0.180081204 | -0.038755221 | 0.422780181 | 0.096032975  |
| 0.98279258  | 0.001959735  | 0.967678821 | 0.026407279  | 0.585001151 | 0.014415698  |
| 0.635423348 | -0.098236158 | 0.041743757 | -0.120332066 | 0.012522247 | 0.000558234  |
| 0.352637309 | 0.063777143  | 0.186833192 | 0.146216607  | 0.002369415 | 0.112593342  |
| 0.865801192 | 0.058083977  | 0.229377497 | -0.006928415 | 0.88608944  | 0.002552091  |
| 0.473617214 | 0.137799309  | 0.00419891  | 0.345383325  | 1.72E-13    | 0.330010198  |
| 0.108282876 | -0.128209626 | 0.007770874 | -0.064439739 | 0.182286541 | 0.2668744    |
| 0.133307512 | 0.001879629  | 0.968999305 | -0.132237799 | 0.006028463 | -0.260682194 |
| 0.813262061 | -0.068367793 | 0.156999809 | 0.027385896  | 0.571163215 | 0.010292874  |
| 0.007054746 | 0.111940986  | 0.020243573 | -0.102731188 | 0.033195077 | 0.015116022  |
| 0.775249908 | -0.057837999 | 0.23135909  | -0.245383589 | 2.57E-07    | -0.231845398 |
| 0.005414417 | 0.108071618  | 0.02502188  | -0.05613078  | 0.245446594 | -0.218425549 |
| 0.123412672 | 0.042081056  | 0.384050749 | -0.255524983 | 7.76E-08    | -0.308448501 |
| 0.605011204 | -0.056581049 | 0.241674177 | -0.108704326 | 0.024179615 | -0.019782803 |
| 0.257474795 | 0.146057853  | 0.00239579  | -0.080650003 | 0.094870379 | -0.022350506 |
| 0.32762393  | -0.04513522  | 0.350461074 | 0.06118956   | 0.20538883  | 0.241452123  |
| 0.700680198 | 0.21524877   | 6.69E-06    | 0.020083363  | 0.677931737 | -0.088886244 |
| 0.760063293 | 0.104683669  | 0.029975465 | 0.154876744  | 0.001274306 | 0.198291054  |
| 0.144669506 | -0.083283641 | 0.084531604 | 0.124986035  | 0.009475564 | -0.020603512 |
| 0.045456858 | 0.055723366  | 0.248895263 | 0.032197746  | 0.505477677 | -0.087574188 |
| 0.815374861 | 0.050744154  | 0.293779413 | -0.182865481 | 0.000137211 | -0.193018373 |
| 0.321599891 | 0.007273564  | 0.88045632  | 0.090939417  | 0.059541119 | 0.020908711  |
| 0.612544478 | -0.006925673 | 0.886134208 | 0.089611205  | 0.063375909 | 0.211946622  |

|             |              |             |              |             |              |
|-------------|--------------|-------------|--------------|-------------|--------------|
| 0.944508448 | 0.140158363  | 0.00358762  | -0.02208204  | 0.64794009  | 0.110495166  |
| 0.92220038  | -0.058829845 | 0.223442468 | -0.149694541 | 0.001854142 | -0.206327296 |
| 0.13597567  | -0.012729546 | 0.792390434 | -0.294498365 | 4.73E-10    | -0.506119161 |
| 0.993358492 | 0.015467111  | 0.749106035 | -0.011086147 | 0.818693956 | 0.106153587  |
| 0.141842512 | 0.051537409  | 0.286287896 | -0.242039995 | 3.77E-07    | -0.154129863 |
| 0.014278918 | -0.061141911 | 0.20574261  | -0.123945917 | 0.010092528 | -0.012179541 |
| 0.907084213 | -0.008198516 | 0.865390771 | 0.001515914  | 0.974995849 | -0.093323628 |
| 0.405001256 | 0.053769834  | 0.265899857 | -0.113900306 | 0.018142077 | -0.066489061 |
| 0.697410585 | 0.109853211  | 0.022712713 | 0.036356273  | 0.452078816 | -0.008633603 |
| 0.106635581 | 0.004840444  | 0.920279231 | 0.077583775  | 0.108152979 | 0.233162604  |
| 0.401198009 | 0.010453604  | 0.828874364 | -0.191898869 | 6.20E-05    | -0.127653278 |
| 0.918262181 | 0.080066372  | 0.097292918 | 0.339344404  | 4.76E-13    | 0.494741396  |
| 0.098614923 | 0.012546198  | 0.795313979 | -0.147389956 | 0.002182544 | -0.079641359 |
| 0.92730281  | -0.062573535 | 0.195304779 | 0.031395091  | 0.516152577 | 0.126415835  |
| 0.270984388 | -0.007097536 | 0.883328499 | 0.009325799  | 0.847095903 | 0.014656656  |
| 0.588654794 | -0.007900048 | 0.870247144 | 0.011735386  | 0.808276438 | -0.061708871 |
| 0.713637601 | -0.056711827 | 0.240586168 | -0.145028846 | 0.002573343 | 0.121258525  |
| 0.739927153 | -0.013300287 | 0.783308577 | -0.014699409 | 0.761171633 | 0.052428367  |
| 0.711459504 | 0.044041921  | 0.362265648 | 0.081684083  | 0.090696577 | 0.141201266  |
| 0.00155105  | -0.016876655 | 0.727113384 | 0.044808025  | 0.353968105 | 0.167908764  |
| 0.163938048 | -0.03803032  | 0.431514567 | 0.073423255  | 0.128471392 | -0.204174789 |
| 0.758964769 | 0.045917154  | 0.342169245 | 0.124680047  | 0.00965349  | 0.26215117   |
| 0.166139489 | -0.141122457 | 0.003361922 | -0.256169044 | 7.18E-08    | -0.239129361 |
| 0.293568665 | -0.040061206 | 0.40730735  | -0.010290703 | 0.831500879 | 0.026007491  |
| 0.00212086  | 0.056396233  | 0.243217646 | -0.075032125 | 0.120289209 | -0.18899766  |
| 0.384841825 | 0.028157098  | 0.56036875  | -0.063934173 | 0.185748199 | 0.077268488  |
| 0.062510605 | 0.009318401  | 0.847215698 | 0.034802867  | 0.471645094 | 0.062479361  |
| 0.593982387 | -0.017455939 | 0.718138394 | -0.09585782  | 0.046973329 | -0.157667221 |
| 0.172414609 | 0.325736976  | 4.37E-12    | 0.032407583  | 0.502706181 | 0.081331472  |
| 0.793836673 | 0.041207834  | 0.394003997 | -0.004798288 | 0.920971258 | 0.052913962  |
| 0.552556435 | -0.016076213 | 0.739576254 | 0.056603597  | 0.241486344 | 0.055509641  |
| 0.07671497  | 0.009701479  | 0.841016619 | 0.19479528   | 4.77E-05    | 0.260390976  |
| 0.469446932 | 0.087469773  | 0.069985209 | 0.212013725  | 9.24E-06    | 0.146563818  |
| 0.038464039 | 0.108003307  | 0.025114312 | -0.077458449 | 0.108725595 | -0.103381929 |
| 0.458980058 | -0.041621598 | 0.389268537 | -0.042187648 | 0.38284637  | -0.035930786 |
| 0.176375634 | -0.00411322  | 0.932225111 | -0.166729871 | 0.000517269 | -0.15496017  |
| 0.833628894 | 0.032850423  | 0.496883587 | 0.034381747  | 0.477028461 | -0.043379986 |
| 0.167755403 | -0.04257533  | 0.378485456 | -0.009597946 | 0.842691065 | -0.064515829 |
| 0.532119217 | 0.057862691  | 0.231159623 | 0.114921719  | 0.017124009 | 0.218808704  |
| 0.048661221 | -0.136801707 | 0.004484622 | -0.289128158 | 1.00E-09    | -0.253152619 |
| 0.555193343 | -0.017582791 | 0.716178157 | -0.023150625 | 0.6321319   | 0.030083448  |
| 0.758413806 | -0.006331749 | 0.895840917 | -0.00512827  | 0.915555994 | -0.121140214 |
| 0.311891777 | 0.071634589  | 0.138066897 | -0.204861448 | 1.86E-05    | -0.166080221 |
| 0.312094759 | 0.093339151  | 0.053099367 | 0.074739576  | 0.121745982 | 0.220398511  |
| 0.295067057 | 0.000310411  | 0.994879151 | 0.008276375  | 0.86412475  | 0.090546005  |
| 0.845705671 | 0.0946621    | 0.049803467 | 0.017950631  | 0.71050452  | -0.173106639 |
| 0.186995385 | 0.246268589  | 2.32E-07    | 0.282302732  | 2.55E-09    | 0.271514112  |
| 0.100123523 | 0.145446808  | 0.002499827 | 0.106723807  | 0.026900841 | -0.087639973 |
| 0.265464641 | 0.087213245  | 0.070813464 | 0.081211686  | 0.092584659 | 0.197707465  |
| 0.013888911 | -0.017988606 | 0.709919685 | -0.084589092 | 0.079754507 | -0.181553279 |
| 0.768388133 | -0.126493414 | 0.008640913 | -0.077777504 | 0.107272513 | -0.193537261 |

|              |               |              |               |              |               |
|--------------|---------------|--------------|---------------|--------------|---------------|
| 0. 089154939 | 0. 064613241  | 0. 181109613 | -0. 177417943 | 0. 000217576 | -0. 306602122 |
| 0. 630144427 | -0. 013467303 | 0. 780656448 | -0. 039455222 | 0. 414444571 | 0. 2159702    |
| 0. 198390612 | -0. 012106639 | 0. 802334474 | 0. 032596395  | 0. 500219237 | -0. 208884094 |
| 0. 543475094 | -0. 032189056 | 0. 505592622 | -0. 006116304 | 0. 899365925 | 0. 025852136  |
| 0. 34956512  | 0. 087224531  | 0. 070776855 | -0. 122369641 | 0. 01109553  | -0. 046473239 |
| 0. 041091095 | -0. 068022759 | 0. 159108752 | 0. 036827554  | 0. 446234373 | 0. 115804737  |
| 0. 677083755 | 0. 006353529  | 0. 895484679 | 0. 152168394  | 0. 001552458 | 0. 147249214  |
| 0. 925495717 | 0. 062016997  | 0. 199315504 | 0. 26262506   | 3. 25E-08    | 0. 209739377  |
| 0. 204554113 | 0. 022304751  | 0. 644632015 | -0. 078789101 | 0. 102766523 | -0. 010889943 |
| 0. 321000375 | -0. 040213095 | 0. 405529934 | -0. 037562953 | 0. 437200753 | 0. 007577828  |
| 0. 96461689  | -0. 137273788 | 0. 0043473   | -0. 199195817 | 3. 18E-05    | -0. 265966417 |
| 0. 922698387 | 0. 306393512  | 8. 48E-11    | 0. 246104953  | 2. 36E-07    | 0. 164944496  |
| 0. 220994997 | 0. 032679363  | 0. 499128477 | -0. 072246868 | 0. 134722154 | -0. 076269953 |
| 0. 904209851 | -0. 041994745 | 0. 385027669 | 0. 307580134  | 7. 11E-11    | 0. 381387002  |
| 0. 896074387 | -0. 016866061 | 0. 727277873 | 0. 101010252  | 0. 036272985 | 0. 071599412  |
| 0. 038182787 | 0. 195991469  | 4. 28E-05    | 0. 056701132  | 0. 240675015 | 0. 090562745  |
| 0. 331276922 | -0. 174499427 | 0. 000277014 | -0. 132778269 | 0. 005823567 | -0. 112397037 |
| 0. 408013504 | 0. 119266496  | 0. 013330974 | -0. 037260904 | 0. 440898348 | -0. 246749319 |
| 0. 10821842  | 0. 061683964  | 0. 201744031 | 0. 023427323  | 0. 628065329 | 0. 015348997  |
| 0. 419775839 | -0. 035655824 | 0. 460844366 | 0. 031785195  | 0. 510949875 | 0. 020265652  |
| 0. 002417011 | 0. 01667181   | 0. 730296126 | -0. 062811252 | 0. 193609748 | -0. 289076436 |
| 0. 305250611 | 0. 075352552  | 0. 118709258 | -0. 112558966 | 0. 01955899  | -0. 307107991 |
| 0. 969071584 | 0. 019063331  | 0. 693440194 | -0. 054704293 | 0. 257668873 | -0. 088334041 |
| 0. 322816135 | -0. 152106165 | 0. 001559459 | -0. 237592098 | 6. 23E-07    | -0. 241689931 |
| 0. 314678225 | 0. 117784547  | 0. 014532075 | 0. 090208489  | 0. 061626992 | 0. 02614761   |
| 0. 370695648 | -0. 009986422 | 0. 836411915 | -0. 121839597 | 0. 011452099 | -0. 06585078  |
| 0. 515066571 | 0. 304404842  | 1. 14E-10    | -0. 043407466 | 0. 369228448 | -0. 05282415  |
| 0. 000970692 | 0. 09913811   | 0. 039893302 | 0. 006911883  | 0. 886359403 | -0. 245967041 |
| 0. 356512744 | 0. 005518743  | 0. 909153105 | 0. 006079832  | 0. 899962862 | 0. 021493635  |
| 0. 475215408 | -0. 161200237 | 0. 000793776 | -0. 235624708 | 7. 75E-07    | -0. 156110223 |
| 0. 904451681 | 0. 125221024  | 0. 009340907 | 0. 15689691   | 0. 001097535 | 0. 149960092  |
| 0. 685988532 | 0. 031059331  | 0. 52065232  | -0. 127225932 | 0. 00825947  | -0. 278778908 |
| 0. 216680658 | 0. 149310413  | 0. 00190553  | 0. 269722568  | 1. 33E-08    | 0. 084327741  |
| 0. 255117716 | -0. 006860546 | 0. 887197803 | 0. 12109355   | 0. 011971141 | 0. 24006793   |
| 0. 556034867 | 0. 037814237  | 0. 434138204 | -0. 110825445 | 0. 021532189 | -0. 135520473 |
| 0. 415258616 | 0. 016167286  | 0. 738154738 | -0. 016032483 | 0. 740259125 | -0. 02897476  |
| 0. 206106909 | 0. 033133395  | 0. 493181828 | -0. 033651933 | 0. 486436843 | -0. 034717051 |
| 0. 538305225 | 0. 131605393  | 0. 006276412 | -0. 107775396 | 0. 025424835 | -0. 155818064 |
| 0. 182330411 | 0. 051372752  | 0. 287832245 | 0. 379351134  | 3. 64E-16    | 0. 278911686  |
| 0. 276532757 | 0. 011465864  | 0. 812597122 | 0. 0705181    | 0. 144329716 | 0. 208531896  |
| 0. 179733196 | -0. 007565747 | 0. 875692338 | 0. 043920552  | 0. 363591225 | 0. 184776388  |
| 0. 557201679 | -0. 149318392 | 0. 00190445  | -0. 121666996 | 0. 011570379 | 0. 023619688  |
| 0. 159330339 | 0. 013091721  | 0. 78662402  | 0. 186305108  | 0. 000101853 | 0. 258197391  |
| 0. 221286078 | 0. 01030734   | 0. 831232543 | 0. 048038249  | 0. 320312195 | 0. 105797775  |
| 0. 485116311 | 0. 036727218  | 0. 447475055 | -0. 036852593 | 0. 445925061 | 0. 083900421  |
| 0. 238361523 | 0. 139807426  | 0. 003673127 | 0. 140145288  | 0. 003590773 | 0. 134804514  |
| 0. 044634283 | -0. 07109736  | 0. 141053864 | 0. 004384683  | 0. 927763947 | -0. 055482459 |
| 0. 660707278 | 0. 078697908  | 0. 103166474 | 0. 155860121  | 0. 001185221 | 0. 195270458  |
| 0. 414713587 | 0. 033120717  | 0. 493347359 | -0. 206463472 | 1. 59E-05    | -0. 185109477 |
| 0. 009344101 | -0. 081455959 | 0. 091604455 | -0. 248736557 | 1. 74E-07    | -0. 30697926  |
| 0. 786608546 | -0. 151081133 | 0. 001679022 | 0. 051564201  | 0. 286037136 | 0. 146475246  |

|             |              |             |              |             |              |
|-------------|--------------|-------------|--------------|-------------|--------------|
| 0.033733521 | 0.084224162  | 0.081067352 | -0.169307631 | 0.000421717 | -0.31349417  |
| 0.28898125  | 0.039061517  | 0.419120841 | -0.23944351  | 5.06E-07    | -0.392218338 |
| 0.50692516  | 0.163815216  | 0.000649341 | 0.269333579  | 1.40E-08    | 0.131753404  |
| 0.586895597 | 0.024730779  | 0.609061343 | -0.129645757 | 0.007103863 | -0.114096412 |
| 6.72E-05    | 0.252067567  | 1.17E-07    | 0.135762752  | 0.004800728 | 0.056590628  |
| 0.648169124 | 0.364420243  | 5.96E-15    | 0.031548289  | 0.514106162 | 0.050070047  |
| 0.350102072 | 0.027529306  | 0.569148468 | 0.267967895  | 1.66E-08    | 0.258241171  |
| 0.447406387 | 0.053073119  | 0.272152907 | -0.161757327 | 0.00076072  | -0.363258065 |
| 0.020704904 | 0.088202325  | 0.067663547 | 0.100178179  | 0.037846047 | 0.07205634   |
| 0.075586143 | 0.154374202  | 0.001322172 | 0.165937874  | 0.000550443 | 0.140171894  |
| 0.289756008 | 0.025025097  | 0.6048058   | -0.185305829 | 0.000111125 | -0.033905652 |
| 0.502070364 | -0.012347014 | 0.798493263 | 0.176186217  | 0.000241035 | 0.157275605  |
| 0.96983513  | -0.0087558   | 0.85633689  | -0.074320962 | 0.123854362 | -0.174925348 |
| 0.432499322 | 0.134894387  | 0.005080196 | -0.017391633 | 0.719132818 | -0.061900516 |
| 0.888294469 | 0.219959307  | 4.14E-06    | 0.088656971  | 0.066254669 | -0.076636122 |
| 0.816453996 | -0.0371848   | 0.441832806 | 0.081092007  | 0.093067952 | 0.009404465  |
| 0.016370962 | -0.011294516 | 0.815346958 | -0.09253953  | 0.05517813  | -0.101807775 |
| 0.850068586 | 0.059882873  | 0.215250916 | 0.221775316  | 3.43E-06    | 0.335739256  |
| 0.646366951 | -0.16469213  | 0.00060664  | -0.029648482 | 0.539777699 | 0.062527564  |
| 0.228507187 | -0.294317478 | 4.86E-10    | -0.280228299 | 3.36E-09    | -0.225003506 |
| 0.031353265 | 0.084607851  | 0.079687489 | 0.020094723  | 0.677759759 | -0.007822514 |
| 0.059544953 | 0.051502862  | 0.286611456 | 0.186866311  | 9.70E-05    | 0.403338068  |
| 0.000481968 | 0.076208027  | 0.114570501 | 0.063454942  | 0.189074024 | 0.151255679  |
| 0.78596198  | 0.1021964    | 0.034126771 | 0.07036086   | 0.145228893 | 0.187195123  |
| 0.860622971 | 0.330209809  | 2.13E-12    | 0.067896259  | 0.159887284 | -0.056092516 |
| 0.016605266 | 0.032000659  | 0.508088057 | -0.203184214 | 2.18E-05    | -0.273887589 |
| 0.134424306 | -0.062220768 | 0.197840111 | -0.017987854 | 0.709931255 | 0.370715323  |
| 0.791377668 | -0.04118739  | 0.394238873 | 0.208056857  | 1.36E-05    | 0.088310299  |
| 0.163056462 | 0.141181227  | 0.00334859  | 0.210890209  | 1.03E-05    | 0.35886026   |
| 0.042752816 | 0.001198119  | 0.980236497 | -0.078668216 | 0.103296962 | -0.227430436 |
| 0.271816261 | -0.064978915 | 0.178647534 | 0.142309294  | 0.003101807 | 0.207891198  |
| 0.654625395 | 0.192590279  | 5.83E-05    | -0.065498502 | 0.175191968 | -0.33096568  |
| 0.09923826  | 0.116925402  | 0.015271095 | -0.184527234 | 0.000118893 | -0.184132473 |
| 0.705682247 | 0.038820142  | 0.422003014 | -0.04749808  | 0.325790168 | -0.123767412 |
| 0.234138507 | 0.073444226  | 0.128362033 | -0.17741475  | 0.000217634 | 0.021469026  |
| 0.981638858 | 0.154455932  | 0.001314277 | 0.129038613  | 0.007379335 | 0.045781589  |
| 0.840750858 | 0.137596039  | 0.004255755 | -0.009593917 | 0.842756244 | -0.0403664   |
| 0.828552863 | 0.056636156  | 0.241215297 | -0.043842997 | 0.364439855 | -0.054125987 |
| 0.00586241  | 0.163022255  | 0.000690336 | -0.048779788 | 0.312890395 | -0.205043946 |
| 0.50778708  | -0.156226686 | 0.001153507 | -0.352329815 | 5.17E-14    | -0.465234107 |
| 0.219828284 | 0.165141585  | 0.000585778 | 0.201678561  | 2.52E-05    | 0.277159487  |
| 0.562352148 | -0.020831817 | 0.666637747 | -0.212419982 | 8.88E-06    | -0.081140555 |
| 0.0276821   | -0.037991335 | 0.431987245 | -0.215562042 | 6.48E-06    | -0.414294145 |
| 0.074412769 | -0.003961071 | 0.934726436 | -0.154283373 | 0.001330998 | -0.185359497 |
| 0.550958384 | -0.085442278 | 0.076752286 | -0.085013537 | 0.078249276 | 0.1855048    |
| 0.090879304 | -0.055601878 | 0.249930131 | -0.136270909 | 0.004643692 | 0.103394143  |
| 0.571192305 | -0.078040791 | 0.106084997 | -0.175706269 | 0.000250801 | -0.301555287 |
| 0.039406002 | 0.015618371  | 0.746735844 | -0.142692904 | 0.003021727 | -0.254833294 |
| 0.640659536 | -0.015263859 | 0.752294628 | 0.074714906  | 0.12186945  | -0.064798749 |
| 0.548859191 | 0.079254859  | 0.100742961 | 0.1547936    | 0.001282113 | 0.203307404  |
| 0.60107494  | 0.117110867  | 0.015108828 | 0.027023509  | 0.576269341 | 0.019326518  |

|              |               |              |               |              |               |
|--------------|---------------|--------------|---------------|--------------|---------------|
| 0. 563133919 | 0. 017724385  | 0. 713992317 | 0. 143369773  | 0. 002885    | 0. 157000038  |
| 0. 026740133 | 0. 022060511  | 0. 648260254 | -0. 01698892  | 0. 725371084 | -0. 14983766  |
| 0. 626552579 | -0. 05208543  | 0. 253301217 | 0. 002770996  | 0. 954311439 | 0. 098067978  |
| 0. 01696356  | 0. 059864855  | 0. 21538924  | 0. 124821493  | 0. 009570876 | 0. 122739412  |
| 0. 987173775 | 0. 063022285  | 0. 192114023 | -0. 061810601 | 0. 200818052 | -0. 386863834 |
| 0. 387899026 | 0. 01311163   | 0. 786233107 | 0. 110531473  | 0. 021883396 | 0. 079237479  |
| 0. 062468253 | 0. 11528908   | 0. 016770259 | -0. 183140189 | 0. 000134011 | -0. 229563727 |
| 0. 179935973 | 0. 155338471  | 0. 001231737 | 0. 149308312  | 0. 001905815 | 0. 035759846  |
| 0. 00193354  | 0. 031678871  | 0. 512365171 | -0. 17748597  | 0. 000216345 | -0. 229560537 |
| 0. 663322264 | 0. 019967986  | 0. 679679252 | -0. 006015657 | 0. 901013354 | -0. 007569563 |
| 0. 195666607 | 0. 017546984  | 0. 716731294 | 0. 008947529  | 0. 853226274 | 0. 010696093  |
| 0. 342334329 | 0. 0271249    | 0. 574838557 | -0. 025339806 | 0. 600270193 | -0. 005626164 |
| 0. 866541832 | 0. 03557809   | 0. 461822941 | 0. 357195563  | 2. 19E-14    | 0. 223991852  |
| 0. 41493838  | 0. 128210166  | 0. 007770613 | 0. 009107577  | 0. 850631368 | -0. 060695222 |
| 0. 032181051 | 0. 141812994  | 0. 00320827  | -0. 054296334 | 0. 261240374 | -0. 068863362 |
| 0. 768751516 | -0. 022524405 | 0. 641376206 | -0. 061052197 | 0. 206409899 | -0. 074690005 |
| 0. 729349852 | -0. 001786375 | 0. 970536629 | 0. 394213286  | 1. 94E-17    | 0. 201395009  |
| 0. 88846474  | 0. 052049996  | 0. 281516002 | 0. 176608758  | 0. 000232734 | 0. 16606601   |
| 0. 757854219 | -0. 017558833 | 0. 716548231 | 0. 021981961  | 0. 6494289   | 0. 151736953  |
| 0. 909480796 | -0. 104438666 | 0. 030364201 | -0. 058472874 | 0. 226269159 | -0. 067246732 |
| 0. 250065874 | -0. 109231332 | 0. 023496868 | 0. 026975112  | 0. 576952892 | 0. 118545326  |
| 0. 688043719 | 0. 012261899  | 0. 799852848 | -0. 012101872 | 0. 802410694 | 0. 001321072  |
| 0. 501140009 | -0. 006236059 | 0. 897406299 | 0. 010757994  | 0. 8239717   | -0. 008470345 |
| 0. 028601815 | -0. 021434315 | 0. 657600431 | -0. 070688144 | 0. 143362107 | -0. 305911247 |
| 0. 007861237 | 0. 088475224  | 0. 066814957 | -0. 228340651 | 1. 71E-06    | -0. 315283896 |
| 0. 040216163 | 0. 068094963  | 0. 158665667 | -0. 104181206 | 0. 030777344 | -0. 181658852 |
| 0. 537115503 | -0. 037315049 | 0. 440234209 | -0. 263878095 | 2. 78E-08    | -0. 33855357  |
| 0. 868302521 | -0. 041926261 | 0. 385803883 | -0. 139976368 | 0. 003631736 | -0. 153601235 |
| 0. 602024188 | 0. 102211317  | 0. 034100483 | -0. 076109314 | 0. 115042218 | -0. 132170234 |
| 0. 540222434 | -0. 024677456 | 0. 609833752 | 0. 150804889  | 0. 001712651 | 0. 06633857   |
| 0. 01137785  | 0. 028749875  | 0. 552139208 | -0. 073090423 | 0. 130216669 | -0. 022655848 |
| 0. 17431631  | -0. 071524107 | 0. 138677171 | -0. 06079401  | 0. 20833903  | -0. 225912234 |
| 0. 038103859 | -0. 00533421  | 0. 912178325 | 0. 008588619  | 0. 859051064 | 0. 180111214  |
| 0. 412962061 | -0. 01802002  | 0. 709436025 | 0. 108125502  | 0. 024949176 | 0. 206573669  |
| 0. 365059183 | 0. 024748504  | 0. 608804676 | 0. 094342965  | 0. 05058247  | 0. 266909234  |
| 0. 007824904 | -0. 00658839  | 0. 891644554 | -0. 040771814 | 0. 3990316   | -0. 236572086 |
| 0. 977432293 | 0. 227590847  | 1. 86E-06    | 0. 043605437  | 0. 367046982 | 0. 003532242  |
| 0. 18680265  | -0. 016226512 | 0. 737230784 | 0. 140553529  | 0. 003493499 | 0. 037244225  |
| 0. 129544639 | -0. 044693153 | 0. 355204579 | -0. 271970217 | 9. 94E-09    | -0. 458907844 |
| 0. 311628778 | -0. 030474672 | 0. 528535505 | -0. 101362221 | 0. 035624486 | -0. 131142774 |
| 0. 854421732 | 0. 023490092  | 0. 627144392 | 0. 022414178  | 0. 643009181 | -0. 006969049 |
| 0. 104054818 | -0. 003554701 | 0. 941410221 | -0. 195290036 | 4. 56E-05    | -0. 425635093 |
| 0. 893513013 | -0. 003582638 | 0. 940950593 | -0. 050645209 | 0. 294722957 | -0. 062886818 |
| 0. 959501412 | 0. 106663207  | 0. 026988101 | -0. 003537815 | 0. 941688044 | -0. 12252036  |
| 0. 266111967 | -0. 012993712 | 0. 788183346 | 0. 006446888  | 0. 893957897 | 0. 205686726  |
| 0. 582587827 | -0. 027071832 | 0. 575587221 | -0. 044845902 | 0. 353560994 | -0. 099065113 |
| 0. 124224454 | 0. 018271593  | 0. 705566943 | -0. 344231495 | 2. 09E-13    | -0. 387533106 |
| 0. 878618676 | 0. 092076354  | 0. 056412858 | 0. 10783214   | 0. 025347216 | 0. 257045544  |
| 0. 253150485 | 0. 103116086  | 0. 032538021 | 0. 077220266  | 0. 109820439 | -0. 128578125 |
| 0. 030947759 | 0. 030418262  | 0. 529299301 | 0. 062157611  | 0. 19829654  | 0. 333665995  |
| 0. 332311407 | 0. 250669343  | 1. 39E-07    | -0. 049220002 | 0. 308538259 | -0. 138856071 |



|              |               |              |               |              |               |
|--------------|---------------|--------------|---------------|--------------|---------------|
| 0. 733731458 | -0. 084848525 | 0. 078831704 | 0. 039999607  | 0. 408029513 | 0. 140161366  |
| 0. 020168245 | 0. 115105493  | 0. 016946237 | 0. 211074878  | 1. 01E-05    | 0. 0428118    |
| 0. 911939296 | -0. 008446722 | 0. 861356054 | -0. 25007503  | 1. 49E-07    | -0. 190441295 |
| 0. 912677657 | 0. 168698163  | 0. 000442697 | 0. 396991011  | 1. 10E-17    | 0. 240404572  |
| 0. 277214928 | 0. 006944175  | 0. 885832087 | -0. 049373063 | 0. 307034425 | -0. 03296707  |
| 0. 619812083 | 0. 059380239  | 0. 219133623 | -0. 335529175 | 8. 96E-13    | -0. 437560703 |
| 0. 434692507 | 0. 021145078  | 0. 661932793 | -0. 173166353 | 0. 000308932 | -0. 321494688 |
| 0. 222783098 | -0. 073098046 | 0. 130176494 | -0. 043855472 | 0. 364303267 | -0. 005059352 |
| 0. 97109785  | 0. 00535813   | 0. 91178611  | 0. 07185291   | 0. 136867021 | -0. 197887529 |
| 0. 570117312 | 0. 176139764  | 0. 000241965 | 0. 021017505  | 0. 663847257 | 0. 008944175  |
| 0. 786105634 | 0. 051160104  | 0. 289834987 | 0. 023140321  | 0. 632283555 | 0. 091239924  |
| 0. 506834455 | 0. 186812877  | 9. 74E-05    | 0. 080872295  | 0. 093960452 | 0. 078561445  |
| 0. 102539621 | 0. 016065739  | 0. 739739795 | -0. 188693968 | 8. 26E-05    | -0. 306369569 |
| 0. 022588157 | 0. 08347755   | 0. 083807769 | 0. 035670197  | 0. 460663546 | 0. 087736507  |
| 0. 720889353 | 0. 065877539  | 0. 172702666 | -0. 137896236 | 0. 004172046 | -0. 303771217 |
| 0. 503864658 | 0. 067798834  | 0. 160488835 | 0. 391985552  | 3. 04E-17    | 0. 221671298  |
| 0. 224238228 | -0. 036684823 | 0. 447999866 | -0. 127744886 | 0. 007998397 | -0. 03565244  |
| 0. 965551172 | 0. 32709709   | 3. 52E-12    | 0. 083178296  | 0. 084926948 | 0. 063342286  |
| 0. 666704788 | -0. 033061135 | 0. 494125702 | -0. 015832027 | 0. 743392004 | 0. 053384759  |
| 0. 770927242 | 0. 020708201  | 0. 66849799  | 0. 224387231  | 2. 61E-06    | 0. 252021213  |
| 0. 176637315 | 0. 176212985  | 0. 000240501 | 0. 21079668   | 1. 04E-05    | 0. 356622304  |
| 0. 085952465 | -0. 015509343 | 0. 748444034 | 0. 020852986  | 0. 666319384 | -0. 019282002 |
| 0. 83482774  | 0. 003012995  | 0. 950326258 | -0. 028593169 | 0. 554308996 | -0. 061462244 |
| 0. 201286085 | 0. 021169725  | 0. 661563175 | -0. 021531929 | 0. 656140893 | 0. 225792801  |
| 0. 569989579 | 0. 041476979  | 0. 39091975  | 0. 083975293  | 0. 081972649 | 0. 099563246  |
| 0. 035060076 | 0. 088035047  | 0. 068188057 | 0. 029967801  | 0. 535418524 | 0. 133701483  |
| 0. 98398405  | 0. 050418621  | 0. 296891339 | -0. 067111168 | 0. 164783368 | -0. 198706166 |
| 0. 416642526 | 0. 294745733  | 4. 57E-10    | 0. 09553438   | 0. 047725242 | 0. 051208458  |
| 0. 852852275 | -0. 029139751 | 0. 546758975 | -0. 075151739 | 0. 119697511 | 0. 123903875  |
| 0. 043519247 | 0. 133442776  | 0. 005580235 | -0. 071059284 | 0. 141267427 | -0. 146180595 |
| 0. 391568575 | 0. 009764744  | 0. 839993772 | -0. 235850772 | 7. 56E-07    | -0. 050866425 |
| 5. 36E-06    | 0. 112740005  | 0. 019362296 | 0. 049797105  | 0. 302893498 | -0. 086648824 |
| 0. 047531622 | -0. 056049237 | 0. 246134148 | 0. 018252096  | 0. 705866533 | -0. 000465436 |
| 0. 413661052 | -0. 047572795 | 0. 325028862 | 0. 024259217  | 0. 615907159 | 0. 193711307  |
| 0. 490653568 | 0. 053297642  | 0. 270126941 | 0. 018073939  | 0. 708606143 | 0. 078705399  |
| 0. 524252488 | 0. 009869417  | 0. 838302061 | 0. 171309885  | 0. 000359126 | 0. 063344444  |
| 0. 453342089 | -0. 025097184 | 0. 603765526 | -0. 014401976 | 0. 765862026 | -0. 023096802 |
| 0. 273528101 | 0. 080124367  | 0. 097050009 | 0. 020676841  | 0. 66897023  | -0. 101167108 |
| 0. 955925855 | 0. 182613299  | 0. 000140213 | -0. 170068423 | 0. 000396826 | -0. 154348731 |
| 0. 341760506 | 0. 124495456  | 0. 009762256 | 0. 199242393  | 3. 16E-05    | 0. 081425412  |
| 0. 463354006 | 0. 020939649  | 0. 665016695 | 0. 052021621  | 0. 281778746 | 0. 183655477  |
| 0. 473516974 | 0. 083989898  | 0. 081919297 | 0. 039304195  | 0. 41623476  | 0. 338955523  |
| 0. 054081632 | 0. 00871053   | 0. 857071676 | 0. 319108042  | 1. 24E-11    | 0. 239994815  |
| 0. 199808012 | -0. 004962264 | 0. 918279811 | 0. 022856749  | 0. 636463092 | 0. 035940442  |
| 0. 118367068 | -0. 019700239 | 0. 683741203 | -0. 224495164 | 2. 58E-06    | -0. 364017228 |
| 0. 92646001  | 0. 092114397  | 0. 056310586 | 0. 112786245  | 0. 019312334 | 0. 013029605  |
| 0. 018165885 | 0. 24030984   | 4. 59E-07    | 0. 394611729  | 1. 79E-17    | 0. 10216557   |
| 0. 391383401 | -0. 003703113 | 0. 938968714 | -0. 084184413 | 0. 0812114   | 0. 093088268  |
| 0. 12720635  | 0. 099490523  | 0. 039189372 | -0. 017492225 | 0. 717577485 | -0. 024668776 |
| 0. 004814692 | 0. 066424104  | 0. 169159679 | -0. 031389383 | 0. 516228901 | -0. 115005919 |
| 0. 904434258 | 0. 022429236  | 0. 642786007 | 0. 291800199  | 6. 91E-10    | 0. 089181869  |

|             |              |             |              |             |              |
|-------------|--------------|-------------|--------------|-------------|--------------|
| 0.442288163 | 0.020249345  | 0.675420759 | -0.16786232  | 0.000473051 | -0.110246399 |
| 0.24910062  | 0.038523781  | 0.425557551 | 0.087956143  | 0.068436621 | 0.134230083  |
| 0.307995689 | 0.098509384  | 0.041175708 | 0.214471208  | 7.23E-06    | 0.150470411  |
| 0.174385899 | 0.068851443  | 0.154079236 | 0.012542607  | 0.795371265 | -0.056874545 |
| 0.768721537 | 0.027698839  | 0.566771095 | 0.363112374  | 7.56E-15    | 0.27801726   |
| 0.284630825 | 0.07365802   | 0.127251286 | 0.153331123  | 0.001426844 | 0.134250801  |
| 0.207867417 | -0.039205602 | 0.417405873 | -0.048665848 | 0.314023386 | -0.086281724 |
| 0.127635784 | 0.002956502  | 0.951256464 | 0.107934645  | 0.025207517 | 0.165530385  |
| 0.002094024 | 0.067029931  | 0.165296338 | -0.04006838  | 0.407223304 | -0.121122739 |
| 0.527575912 | -0.011848876 | 0.80645882  | 0.082280896  | 0.088355495 | -0.010060047 |
| 0.120028231 | 0.069924294  | 0.147747817 | -0.079870556 | 0.098116664 | -0.004715537 |
| 0.555698274 | 0.092907133  | 0.054214229 | 0.042210462  | 0.382588901 | -0.007184412 |
| 0.50265933  | 0.136089861  | 0.004699102 | -0.015658636 | 0.746105311 | -0.169212715 |
| 0.317239874 | 0.029227656  | 0.545549478 | -0.152003941 | 0.001571022 | -0.286659916 |
| 0.67432899  | 0.034398707  | 0.476811003 | 0.011324883  | 0.814859444 | -0.061178301 |
| 0.345765729 | 0.076552845  | 0.112934629 | 0.154471525  | 0.001312775 | 0.043935936  |
| 0.63388946  | 0.08691011   | 0.071802503 | 0.016272987  | 0.736506014 | 0.140716775  |
| 0.00036417  | 0.04164406   | 0.389012455 | 0.083053564  | 0.085396974 | -0.257365782 |
| 0.944856006 | -0.041658177 | 0.388851571 | -0.058081987 | 0.229393479 | 0.080279906  |
| 0.114751525 | -0.095781685 | 0.047149423 | -0.047440048 | 0.32638227  | 0.101937606  |
| 0.012564916 | 0.013092974  | 0.786604094 | -0.164918582 | 0.000596045 | -0.262585524 |
| 0.34466084  | -0.026924178 | 0.577672691 | -0.090451134 | 0.060927962 | -0.198388058 |
| 0.810853594 | 0.058372459  | 0.227068863 | 0.214199616  | 7.43E-06    | 0.243542763  |
| 0.496087821 | -0.039374246 | 0.415403851 | 0.066752166  | 0.167059346 | 0.023053791  |
| 0.115044007 | -0.120110219 | 0.012686959 | -0.121141037 | 0.011937495 | -0.116971969 |
| 0.091363987 | -0.01231273  | 0.79904083  | 0.015182782  | 0.753567735 | 0.203887951  |
| 0.108904068 | -0.019484513 | 0.687020617 | -0.08559255  | 0.076233136 | -0.120444832 |
| 0.217010145 | 0.090152492  | 0.061789247 | 0.1510245    | 0.001685866 | 0.153159036  |
| 0.312814476 | 0.081982946  | 0.089518106 | -0.120610368 | 0.01231829  | -0.219306718 |
| 0.727919418 | -0.07119179  | 0.140525284 | 0.030641496  | 0.526279985 | -0.060553581 |
| 0.727319571 | -0.056721302 | 0.24050747  | -0.156964085 | 0.001092066 | -0.101573042 |
| 0.000270638 | 0.015229551  | 0.752833271 | -0.04501881  | 0.351706288 | -0.138361891 |
| 0.649106492 | 0.152506169  | 0.001514959 | 0.236552955  | 6.99E-07    | 0.125826974  |
| 0.795767667 | 0.115516548  | 0.016554438 | -0.069438972 | 0.150586955 | -0.012771635 |
| 0.014295507 | 0.014691918  | 0.761289656 | -0.206235496 | 1.63E-05    | -0.327867005 |
| 0.431900334 | 0.022819394  | 0.63701454  | -0.171859663 | 0.000343521 | -0.155565514 |
| 0.856216054 | 0.04130848   | 0.392848938 | 0.058163498  | 0.228739458 | -0.016266267 |
| 0.825369866 | 0.151436861  | 0.001636608 | -0.012709699 | 0.792706765 | -0.107377533 |
| 0.874796899 | -0.011508523 | 0.811912876 | 0.226309142  | 2.13E-06    | 0.467897456  |
| 0.668310883 | 0.010241994  | 0.832286599 | -0.040833754 | 0.398315054 | 0.10297843   |

| MEturquoise  | MEblack       | MEblack      | MEblue        | MEblue       |
|--------------|---------------|--------------|---------------|--------------|
| 2. 93E-09    | 0. 005850527  | 0. 903717167 | 0. 116834112  | 0. 015351527 |
| 2. 46E-05    | 0. 058475892  | 0. 226245161 | 0. 071921067  | 0. 13649408  |
| 3. 68E-10    | -0. 040519462 | 0. 401958874 | 0. 450444218  | 7. 12E-23    |
| 0. 102085923 | 0. 109564855  | 0. 023073451 | 0. 059651691  | 0. 217030554 |
| 0. 618763456 | 0. 287964664  | 1. 18E-09    | -0. 310529609 | 4. 58E-11    |
| 0. 009565406 | 0. 017491159  | 0. 717593955 | 0. 201017019  | 2. 68E-05    |
| 2. 04E-11    | 0. 020078076  | 0. 678011776 | -0. 159666563 | 0. 000891767 |
| 3. 17E-09    | 0. 060700942  | 0. 209037602 | 0. 243372117  | 3. 24E-07    |
| 0. 516190937 | -0. 061700759 | 0. 201621044 | -0. 142746249 | 0. 003010741 |
| 2. 45E-10    | 0. 008450703  | 0. 861291377 | -0. 29037021  | 8. 44E-10    |
| 0. 00789849  | -0. 028375295 | 0. 557332636 | -0. 340793756 | 3. 73E-13    |
| 0. 096689686 | -0. 167889593 | 0. 000472031 | 0. 13185931   | 0. 00617578  |
| 0. 008114647 | 0. 03911731   | 0. 418456279 | -0. 035599256 | 0. 461556373 |
| 0. 026096193 | 0. 068357434  | 0. 157062817 | -0. 24313094  | 3. 33E-07    |
| 0. 178004124 | 0. 104503937  | 0. 030260218 | 0. 05937741   | 0. 219155623 |
| 0. 012957774 | 0. 044797108  | 0. 354085497 | 0. 080173692  | 0. 096843792 |
| 7. 25E-10    | -0. 236957768 | 6. 68E-07    | 0. 075587974  | 0. 117558815 |
| 1. 90E-05    | 0. 189369498  | 7. 78E-05    | -0. 243684452 | 3. 12E-07    |
| 3. 35E-08    | 0. 130682165  | 0. 00665482  | 0. 207185638  | 1. 49E-05    |
| 2. 48E-10    | 0. 211326382  | 9. 90E-06    | -0. 11887547  | 0. 013639088 |
| 0. 342215172 | -0. 032696285 | 0. 498906165 | -0. 425276599 | 2. 58E-20    |
| 0. 730172758 | 0. 258146636  | 5. 64E-08    | -0. 19035857  | 7. 12E-05    |
| 0. 563458787 | 0. 026724986  | 0. 580491671 | -0. 261978482 | 3. 52E-08    |
| 0. 122724409 | 0. 100120059  | 0. 037958053 | -0. 088442292 | 0. 066916896 |
| 0. 040053884 | -0. 018239495 | 0. 706060181 | -0. 261648764 | 3. 67E-08    |
| 1. 32E-06    | -0. 091743907 | 0. 057313148 | 0. 078707168  | 0. 103125806 |
| 0. 398058521 | -0. 009131929 | 0. 850236695 | 0. 245262078  | 2. 61E-07    |
| 8. 45E-05    | 0. 062160205  | 0. 198277784 | 0. 228915645  | 1. 61E-06    |
| 1. 76E-10    | 0. 041426008  | 0. 391502725 | 0. 246601814  | 2. 23E-07    |
| 0. 000182531 | 0. 115046419  | 0. 017003205 | -0. 053986655 | 0. 263974149 |
| 3. 37E-05    | -0. 108423946 | 0. 024549788 | 0. 066375035  | 0. 169475519 |
| 6. 83E-14    | 0. 080268199  | 0. 096449661 | 0. 247145335  | 2. 09E-07    |
| 0. 001247325 | 0. 014470954  | 0. 7647735   | -0. 310990244 | 4. 27E-11    |
| 0. 552150598 | 0. 032785701  | 0. 497732332 | 0. 230220673  | 1. 40E-06    |
| 0. 383990217 | -0. 03315844  | 0. 492854899 | 0. 259281766  | 4. 91E-08    |
| 0. 368815969 | 0. 400287902  | 5. 61E-18    | -0. 038013853 | 0. 431714188 |
| 0. 674237387 | 0. 075865302  | 0. 116214796 | 0. 5114365    | 4. 93E-30    |
| 1. 80E-08    | 0. 060386285  | 0. 211411949 | 0. 257283718  | 6. 27E-08    |
| 0. 083877286 | 0. 349696981  | 8. 18E-14    | 0. 045402902  | 0. 347608318 |
| 4. 39E-05    | 0. 458519151  | 9. 66E-24    | -0. 04407487  | 0. 361906308 |
| 0. 121960084 | -0. 337096005 | 6. 92E-13    | -0. 06991405  | 0. 147807324 |
| 2. 63E-11    | 0. 263927143  | 2. 76E-08    | 0. 002465194  | 0. 959348934 |
| 1. 27E-09    | 0. 232696649  | 1. 07E-06    | 0. 111270035  | 0. 021010332 |
| 0. 018805841 | 0. 306956805  | 7. 80E-11    | -0. 143681071 | 0. 002824027 |
| 3. 02E-13    | 0. 079637882  | 0. 09910267  | 0. 26584467   | 2. 17E-08    |
| 0. 045369331 | 0. 103506346  | 0. 031883178 | -0. 356484545 | 2. 49E-14    |
| 0. 563277814 | 0. 014728125  | 0. 76071925  | -0. 148038547 | 0. 002085123 |
| 1. 32E-09    | 0. 132257353  | 0. 006020938 | -0. 010570375 | 0. 826992799 |
| 0. 098035011 | 0. 107075931  | 0. 026398596 | -0. 127822903 | 0. 007959792 |
| 0. 911856028 | 0. 40296175   | 3. 22E-18    | -0. 057310535 | 0. 235649098 |

|             |              |             |              |             |
|-------------|--------------|-------------|--------------|-------------|
| 0.112438835 | 0.03493734   | 0.469933124 | -0.091396241 | 0.058267355 |
| 0.724680222 | 0.154637207  | 0.001296919 | -0.327252122 | 3.43E-12    |
| 0.076501178 | -0.031873063 | 0.509781799 | 0.192914659  | 5.66E-05    |
| 0.20107155  | 0.146812222  | 0.002272805 | -0.256400846 | 6.98E-08    |
| 0.006252929 | -0.125552511 | 0.009153847 | -0.138922979 | 0.003896875 |
| 0.229453722 | -0.01244479  | 0.796932179 | -0.22535063  | 2.36E-06    |
| 0.047643201 | 0.117864757  | 0.014464711 | 0.355377505  | 3.03E-14    |
| 9.99E-08    | -0.200924736 | 2.70E-05    | 0.107641787  | 0.025608409 |
| 0.000199088 | 0.068978634  | 0.153318057 | -0.255071974 | 8.19E-08    |
| 0.238429519 | 0.037718266  | 0.435306391 | -0.114563067 | 0.017475648 |
| 0.91617645  | -0.116960265 | 0.015240477 | 0.357927444  | 1.92E-14    |
| 0.028041618 | 0.112458524  | 0.019668867 | -0.157426038 | 0.001055126 |
| 0.00200295  | 0.164230056  | 0.000628805 | -0.05431627  | 0.261065058 |
| 0.034756105 | 0.287269959  | 1.30E-09    | -0.030728177 | 0.525109969 |
| 0.100532868 | 0.25664439   | 6.77E-08    | -0.14994839  | 0.001820881 |
| 0.208504935 | 0.121537772  | 0.011659639 | -0.26319067  | 3.03E-08    |
| 0.173305809 | 0.223217117  | 2.95E-06    | -0.028816998 | 0.551211079 |
| 9.36E-06    | 0.129140618  | 0.007332396 | 0.255211003  | 8.06E-08    |
| 0.24224712  | 0.098327875  | 0.04155234  | -0.159209199 | 0.000923084 |
| 0.103485842 | 0.294968456  | 4.43E-10    | -0.179055618 | 0.000189683 |
| 0.287701582 | 0.007710288  | 0.873337264 | -0.192114998 | 6.08E-05    |
| 3.98E-20    | 0.169361094  | 0.000419921 | -0.160015296 | 0.000868552 |
| 0.083391645 | 0.062079919  | 0.198859071 | -0.197171059 | 3.83E-05    |
| 0.005809937 | 0.034715749  | 0.472756012 | -0.30632869  | 8.56E-11    |
| 0.351843589 | -0.010634296 | 0.825963228 | 0.257768375  | 5.91E-08    |
| 0.58664926  | 0.133807331  | 0.005450659 | -0.125784122 | 0.009025132 |
| 0.060676672 | 0.165088608  | 0.000588202 | -0.18373171  | 0.000127355 |
| 2.16E-05    | 0.103630248  | 0.031677643 | -0.154095143 | 0.001349461 |
| 2.72E-05    | 0.284018124  | 2.02E-09    | 0.045025988  | 0.351629426 |
| 0.463008965 | 0.270927186  | 1.14E-08    | -0.056728612 | 0.240446767 |
| 0.00064079  | 0.0476369    | 0.324376599 | -0.065118067 | 0.177717171 |
| 0.00018808  | 0.106783128  | 0.026815659 | -0.016770303 | 0.728765224 |
| 0.415659145 | 0.153416241  | 0.001418025 | -0.14630707  | 0.002354504 |
| 0.603916317 | 0.226404216  | 2.11E-06    | -0.258955259 | 5.11E-08    |
| 0.470414918 | 0.034949119  | 0.469783328 | -0.210420144 | 1.08E-05    |
| 0.002471943 | 0.008248946  | 0.864570717 | -0.048171035 | 0.318974819 |
| 0.141683959 | 0.108853166  | 0.023985074 | -0.0346937   | 0.473037413 |
| 0.970542979 | 0.162196395  | 0.000735569 | -0.053877838 | 0.26493941  |
| 0.871569779 | 0.266680582  | 1.96E-08    | -0.033325372 | 0.490678837 |
| 0.000664783 | 0.341813685  | 3.15E-13    | -0.120975489 | 0.012055156 |
| 2.87E-06    | -0.019378531 | 0.688633878 | 0.282749759  | 2.40E-09    |
| 9.14E-09    | -0.015324426 | 0.75134401  | 0.31208011   | 3.63E-11    |
| 0.009188776 | -0.038323823 | 0.42796564  | -0.129701896 | 0.007078862 |
| 0.180565084 | 0.072934649  | 0.131039778 | -0.212377084 | 8.92E-06    |
| 0.014795395 | -0.25335813  | 1.01E-07    | -0.036851454 | 0.445939131 |
| 0.693138065 | 0.013976601  | 0.772584859 | -0.379141444 | 3.78E-16    |
| 0.212462626 | 0.003237496  | 0.946630342 | -0.012588275 | 0.79464278  |
| 1.43E-08    | 0.197215714  | 3.82E-05    | -0.035600566 | 0.461539883 |
| 0.921230347 | 0.177594255  | 0.000214399 | -0.319751632 | 1.12E-11    |
| 9.88E-06    | -0.201866321 | 2.47E-05    | 0.291927445  | 6.79E-10    |
| 7.91E-09    | -0.001047266 | 0.982724464 | 0.217819569  | 5.15E-06    |

|              |               |              |               |              |
|--------------|---------------|--------------|---------------|--------------|
| 1. 47E-05    | 0. 315635653  | 2. 11E-11    | -0. 158900212 | 0. 000944812 |
| 0. 001522134 | 0. 05539922   | 0. 251663093 | 0. 375351105  | 7. 80E-16    |
| 0. 473566724 | 0. 01945553   | 0. 687461645 | -0. 097067746 | 0. 044248065 |
| 0. 00184003  | 0. 344618658  | 1. 96E-13    | -0. 111270943 | 0. 021009278 |
| 0. 171934076 | -0. 041587279 | 0. 389659998 | -0. 090344199 | 0. 061235219 |
| 7. 48E-13    | 0. 016898339  | 0. 726776758 | 0. 26990748   | 1. 30E-08    |
| 0. 013857164 | 0. 326785685  | 3. 70E-12    | 0. 168106224  | 0. 000464    |
| 0. 036182562 | -0. 104574378 | 0. 030148342 | 0. 013113969  | 0. 78627018  |
| 0. 073459474 | 0. 264185377  | 2. 68E-08    | 0. 029417573  | 0. 542940929 |
| 4. 82E-11    | 0. 155116238  | 0. 00125206  | 0. 090752246  | 0. 060069613 |
| 0. 004343049 | -0. 108354932 | 0. 024641651 | 0. 193935881  | 5. 16E-05    |
| 0. 254991399 | 0. 056341987  | 0. 243671982 | -0. 171357504 | 0. 000357749 |
| 0. 002084654 | 0. 118784756  | 0. 013711457 | -0. 055835315 | 0. 247944295 |
| 0. 008285944 | -0. 171514381 | 0. 000353246 | 0. 001299495  | 0. 978564646 |
| 0. 92109502  | 0. 01856177   | 0. 701113557 | 0. 054245199  | 0. 261690432 |
| 0. 506981394 | 0. 077029285  | 0. 110704568 | -0. 267353812 | 1. 80E-08    |
| 1. 99E-09    | 0. 032854208  | 0. 496833968 | 0. 137974214  | 0. 004150547 |
| 0. 572254726 | -0. 005829442 | 0. 904062489 | -0. 477499701 | 7. 13E-26    |
| 8. 69E-06    | 0. 163639039  | 0. 000658249 | 0. 097022455  | 0. 044347632 |
| 7. 41E-08    | 0. 019513706  | 0. 686576486 | -0. 117205994 | 0. 015026189 |
| 0. 632697786 | 0. 016931258  | 0. 726265793 | -0. 367083284 | 3. 66E-15    |
| 1. 75E-09    | 0. 008512287  | 0. 860290857 | -0. 000479602 | 0. 992088075 |
| 0. 008815102 | 0. 374350165  | 9. 43E-16    | -0. 110515732 | 0. 021902341 |
| 0. 362126641 | 0. 520540791  | 3. 13E-31    | -0. 141236401 | 0. 003336117 |
| 0. 647855079 | 0. 225537585  | 2. 31E-06    | -0. 167989516 | 0. 000468311 |
| 2. 87E-10    | 0. 090980765  | 0. 059424888 | 0. 04486693   | 0. 353335103 |
| 0. 013907803 | -0. 086944759 | 0. 071688886 | 0. 047999914  | 0. 320698966 |
| 0. 285979659 | 0. 201191736  | 2. 64E-05    | -0. 044324946 | 0. 359186209 |
| 0. 000283297 | 0. 103809884  | 0. 031381666 | -0. 321329473 | 8. 75E-12    |
| 3. 32E-07    | 0. 24946111   | 1. 60E-07    | -0. 056055537 | 0. 246080982 |
| 0. 000990555 | -0. 071012866 | 0. 141528116 | -0. 006840215 | 0. 887529864 |
| 0. 131824549 | -0. 001337144 | 0. 977943772 | 0. 236675204  | 6. 90E-07    |
| 1. 46E-05    | 0. 046058719  | 0. 340681528 | 0. 335539727  | 8. 94E-13    |
| 0. 432116562 | 0. 037259853  | 0. 440911248 | -0. 227707528 | 1. 83E-06    |
| 1. 59E-05    | 0. 099507453  | 0. 039155822 | -0. 114551667 | 0. 017486928 |
| 0. 028360128 | 0. 072718866  | 0. 132186613 | -0. 395774984 | 1. 41E-17    |
| 5. 67E-09    | -0. 303397449 | 1. 32E-10    | -0. 211568075 | 9. 66E-06    |
| 0. 888216966 | -0. 155441322 | 0. 001222435 | -0. 139155361 | 0. 003836922 |
| 1. 59E-11    | 0. 029288403  | 0. 544714431 | -0. 142551717 | 0. 003050979 |
| 0. 003245055 | 0. 237337193  | 6. 41E-07    | -0. 182522364 | 0. 00014131  |
| 0. 588656914 | -0. 245134061 | 2. 64E-07    | 0. 101410229  | 0. 0355368   |
| 3. 05E-06    | -0. 014456497 | 0. 765001616 | -0. 142117324 | 0. 0031426   |
| 0. 001300757 | 0. 043877077  | 0. 364066798 | 0. 090427191  | 0. 060996648 |
| 1. 32E-12    | 0. 005793753  | 0. 90464705  | 0. 07997766   | 0. 09766542  |
| 0. 660348939 | 0. 194025627  | 5. 12E-05    | -0. 32622582  | 4. 04E-12    |
| 0. 019381336 | 0. 368866885  | 2. 63E-15    | 0. 010739108  | 0. 824275692 |
| 0. 02067427  | -0. 163206665 | 0. 000680594 | -0. 052244909 | 0. 279715668 |
| 0. 441831787 | -0. 131002674 | 0. 006521196 | 0. 088499368  | 0. 066740305 |
| 4. 05E-12    | 0. 225862056  | 2. 23E-06    | 0. 25392588   | 9. 40E-08    |
| 0. 022026737 | -0. 076462759 | 0. 113360232 | 0. 325689009  | 4. 40E-12    |
| 0. 014220029 | 0. 064634046  | 0. 18096886  | -0. 31196245  | 3. 69E-11    |

|             |              |             |              |             |
|-------------|--------------|-------------|--------------|-------------|
| 0.797564568 | 0.291903275  | 6.82E-10    | -0.093435897 | 0.052852336 |
| 0.188328072 | 0.25363839   | 9.73E-08    | 0.088253941  | 0.067502371 |
| 1.53E-07    | 0.073948155  | 0.125755845 | 0.323620712  | 6.11E-12    |
| 0.084868126 | -0.038206646 | 0.429380469 | 0.198094004  | 3.52E-05    |
| 0.247671851 | 0.143721366  | 0.002816221 | -0.258982995 | 5.09E-08    |
| 6.56E-05    | -0.275635774 | 6.17E-09    | -0.006611119 | 0.891273055 |
| 9.09E-05    | -0.146236211 | 0.002366177 | 0.238244433  | 5.79E-07    |
| 0.018899539 | 0.397778642  | 9.39E-18    | -0.137489742 | 0.004285757 |
| 0.142135676 | 0.440982909  | 6.91E-22    | -0.083779639 | 0.08269009  |
| 0.548475823 | 0.180411646  | 0.00016916  | -0.028854188 | 0.550697165 |
| 0.01640063  | -0.156451271 | 0.001134465 | 0.00401726   | 0.933802617 |
| 0.00761816  | 0.387063424  | 8.09E-17    | 0.015386182  | 0.75037512  |
| 8.20E-06    | 0.091988915  | 0.056648503 | -0.113281947 | 0.018783747 |
| 0.071970814 | -0.092954761 | 0.054090375 | 0.112939827  | 0.019147195 |
| 0.367259587 | 0.092754876  | 0.054611755 | -0.165797059 | 0.000556544 |
| 4.86E-12    | 0.022496569  | 0.641788415 | 0.079309256  | 0.100508702 |
| 0.147943357 | -0.337425207 | 6.55E-13    | -0.132169391 | 0.006054853 |
| 0.036879772 | -0.10712376  | 0.026331002 | 0.096106868  | 0.046401148 |
| 0.306171695 | 0.251829086  | 1.21E-07    | -0.181378594 | 0.000155817 |
| 0.474365609 | 0.266808719  | 1.92E-08    | -0.068590345 | 0.155650754 |
| 3.63E-05    | 0.022751625  | 0.638015455 | 0.186658863  | 9.87E-05    |
| 0.739310538 | -0.14956157  | 0.001871785 | -0.068411967 | 0.156731337 |
| 0.015547649 | 0.077538378  | 0.10836012  | -0.115788967 | 0.01629917  |
| 0.000630215 | 0.028495745  | 0.555660045 | -0.021755071 | 0.652809343 |
| 4.35E-07    | 0.054887353  | 0.256077282 | -0.06787074  | 0.160044686 |
| 8.70E-06    | 0.145625493  | 0.002468985 | -0.05657164  | 0.241752593 |
| 0.003996419 | 0.21063956   | 1.06E-05    | -0.09262123  | 0.054962681 |
| 6.91E-07    | 0.029265122  | 0.545034383 | 0.10257791   | 0.03345987  |
| 0.000667557 | 0.217079678  | 5.56E-06    | 0.374883579  | 8.52E-16    |
| 0.022610302 | -0.026395372 | 0.585170462 | -0.087337993 | 0.070409693 |
| 0.114971033 | 0.050044047  | 0.300499152 | -0.368388479 | 2.87E-15    |
| 0.059835747 | 0.079257257  | 0.100732623 | -0.164526215 | 0.000614514 |
| 1.39E-13    | 0.019160409  | 0.691958578 | -0.42453305  | 3.05E-20    |
| 2.55E-10    | 0.00203845   | 0.966381358 | 0.255696114  | 7.60E-08    |
| 0.012982895 | 0.084342575  | 0.080639456 | 0.186634365  | 9.90E-05    |
| 6.77E-09    | 0.137678328  | 0.004232659 | -0.092333461 | 0.055724665 |
| 0.00052048  | -0.000283935 | 0.995315923 | -0.360409984 | 1.23E-14    |
| 0.018594727 | 0.122258275  | 0.011169621 | 0.018582855  | 0.700790355 |
| 0.717971891 | 0.305584931  | 9.56E-11    | -0.165228711 | 0.000581812 |
| 8.07E-05    | 0.336341594  | 7.84E-13    | 0.010109966  | 0.83441716  |
| 0.419524792 | 0.095147549  | 0.048637734 | 0.065780986  | 0.173334258 |
| 0.090916612 | 0.128202802  | 0.007774172 | -0.003379253 | 0.944297209 |
| 0.978484064 | -0.283943757 | 2.04E-09    | -0.090124025 | 0.061871868 |
| 1.67E-06    | 0.077616217  | 0.108005141 | 0.330072752  | 2.18E-12    |
| 1.42E-05    | 0.004555618  | 0.924955999 | 0.169763696  | 0.000406627 |
| 4.98E-14    | 0.106634883  | 0.027028968 | -0.041807995 | 0.387146584 |
| 0.028398223 | 0.444217638  | 3.20E-22    | -0.146306222 | 0.002354644 |
| 0.054368347 | 0.223368344  | 2.90E-06    | -0.103148186 | 0.032483729 |
| 5.73E-05    | 0.129175988  | 0.007316183 | 0.026506776  | 0.583587163 |
| 0.593456072 | 0.291072496  | 7.65E-10    | -0.077668212 | 0.107768528 |
| 2.59E-09    | -0.087462935 | 0.070007186 | -0.287918975 | 1.18E-09    |

|             |              |             |              |             |
|-------------|--------------|-------------|--------------|-------------|
| 0.722985729 | 0.005845851  | 0.903793754 | -0.162621709 | 0.000711942 |
| 0.981965131 | 0.158289253  | 0.000989171 | 0.029820196  | 0.537431354 |
| 0.52131576  | 0.040866213  | 0.397939863 | -0.356816953 | 2.34E-14    |
| 0.035657581 | 0.122279011  | 0.011155792 | -0.109254589 | 0.023467126 |
| 1.37E-15    | 0.216565867  | 5.85E-06    | 0.235255554  | 8.07E-07    |
| 0.954852046 | -0.13476569  | 0.005122839 | 0.036686154  | 0.447983379 |
| 0.51809943  | -0.116598808 | 0.015560557 | -0.245122287 | 2.65E-07    |
| 1.26E-10    | -0.007494413 | 0.876855014 | 0.431819108  | 5.84E-21    |
| 0.002068829 | 0.209306757  | 1.21E-05    | 0.288386318  | 1.11E-09    |
| 0.076117456 | 0.196490889  | 4.08E-05    | -0.111607211 | 0.020621913 |
| 0.290163035 | 0.229095349  | 1.58E-06    | 0.211683498  | 9.55E-06    |
| 0.001301564 | 0.12219402   | 0.011212568 | -0.267979851 | 1.66E-08    |
| 0.002323152 | -0.153610662 | 0.00139807  | 0.09826037   | 0.041693153 |
| 0.097882476 | 0.25132947   | 1.28E-07    | -0.230222637 | 1.40E-06    |
| 0.372582221 | 0.06457353   | 0.181378485 | -0.401556661 | 4.31E-18    |
| 0.00019783  | 0.131837446  | 0.006184388 | 0.212700573  | 8.63E-06    |
| 0.453683841 | 0.046076625  | 0.34049365  | -0.020348237 | 0.673926431 |
| 1.41E-05    | -0.006021813 | 0.900912578 | 0.308835648  | 5.90E-11    |
| 0.180698491 | -0.266570014 | 1.98E-08    | 0.130154591  | 0.00688012  |
| 6.60E-13    | -0.084173879 | 0.081249608 | 0.024003762  | 0.619629693 |
| 1.63E-05    | 0.28646388   | 1.45E-09    | 0.175850484  | 0.000247828 |
| 0.481768317 | 0.03876166   | 0.422703069 | 0.014066184  | 0.771167625 |
| 0.115807274 | 0.036949977  | 0.44472322  | -0.279114017 | 3.90E-09    |
| 0.182964319 | 0.375060667  | 8.24E-16    | -0.161368238 | 0.00078367  |
| 0.772899093 | 0.058135041  | 0.228967639 | -0.218077359 | 5.02E-06    |
| 1.33E-17    | 0.020874229  | 0.665999979 | -0.324612731 | 5.22E-12    |
| 0.0033509   | -0.133325466 | 0.005622516 | 0.261592279  | 3.69E-08    |
| 0.821741082 | 0.056707564  | 0.240621581 | -0.092098741 | 0.056352655 |
| 1.82E-19    | 0.096715763  | 0.045026811 | -0.278153982 | 4.43E-09    |
| 4.11E-10    | 0.182569996  | 0.000140734 | 0.012601616  | 0.794430011 |
| 0.644239441 | 0.014593572  | 0.762839643 | -0.394396519 | 1.87E-17    |
| 0.084331891 | 0.036899408  | 0.445347074 | -0.143040215 | 0.002950851 |
| 0.008306518 | 0.079079056  | 0.101503017 | -0.09840967  | 0.041382256 |
| 0.904291949 | 0.002563246  | 0.957733531 | 0.17570616   | 0.000250803 |
| 0.013616275 | 0.026568757  | 0.582707125 | 0.23561779   | 7.76E-07    |
| 8.81E-07    | 0.301147213  | 1.83E-10    | -0.144611633 | 0.002648687 |
| 0.790752177 | 0.139037479  | 0.00386723  | 0.065162695  | 0.177419559 |
| 0.883897089 | -0.281288583 | 2.92E-09    | -0.228817565 | 1.63E-06    |
| 0.000159664 | 0.098698763  | 0.04078582  | 0.244734241  | 2.77E-07    |
| 5.18E-13    | 0.316110732  | 1.96E-11    | 0.153810713  | 0.001377807 |
| 1.61E-09    | 0.026044384  | 0.590171765 | 0.049633407  | 0.304487669 |
| 3.97E-09    | 0.154707593  | 0.001290236 | -0.05316876  | 0.271288637 |
| 0.010153158 | 0.371283616  | 1.68E-15    | -0.047215662 | 0.328678244 |
| 9.29E-06    | -0.155941341 | 0.001178126 | 0.202804651  | 2.26E-05    |
| 0.000133773 | 0.013197849  | 0.784936486 | -0.217082399 | 5.55E-06    |
| 0.099107258 | 0.098052157  | 0.042130015 | 0.175696677  | 0.000251    |
| 2.97E-08    | 0.146257052  | 0.002362738 | -0.349866764 | 7.94E-14    |
| 2.46E-05    | -0.021011281 | 0.663940713 | -0.083030877 | 0.085482689 |
| 0.687265755 | 0.012270844  | 0.79970994  | -0.24675973  | 2.19E-07    |
| 0.00269766  | 0.235250906  | 8.08E-07    | 0.069547461  | 0.149948728 |
| 0.758411813 | -0.233376311 | 9.93E-07    | -0.123127145 | 0.010603006 |

|             |              |             |              |             |
|-------------|--------------|-------------|--------------|-------------|
| 0.037440256 | 0.146431063  | 0.002334206 | -0.09385273  | 0.051798923 |
| 0.497319775 | 0.070526746  | 0.144280394 | 0.348735452  | 9.66E-14    |
| 0.010962143 | 0.067781824  | 0.160594034 | 0.243179613  | 3.31E-07    |
| 0.729547633 | 0.087749852  | 0.069089983 | 0.433118141  | 4.33E-21    |
| 0.814682764 | 0.043462781  | 0.368618119 | -0.471182855 | 3.78E-25    |
| 0.178304104 | 0.009352102  | 0.846669953 | -0.242757635 | 3.47E-07    |
| 1.22E-06    | -0.165269123 | 0.000579981 | -0.070842595 | 0.142487536 |
| 0.001041938 | 0.142065274  | 0.003153744 | -0.049902519 | 0.301869868 |
| 0.410033244 | 0.104760635  | 0.02985423  | -0.280659399 | 3.17E-09    |
| 0.099137054 | 0.306188501  | 8.74E-11    | -0.049929995 | 0.301603429 |
| 8.63E-09    | 0.095355637  | 0.048145078 | -0.13526028  | 0.0049607   |
| 0.328492888 | -0.037725785 | 0.435214805 | -0.08273344  | 0.086612889 |
| 3.48E-10    | -0.139383319 | 0.003778923 | 0.204998477  | 1.83E-05    |
| 0.040816973 | 0.051797498  | 0.283859848 | 0.009933824  | 0.837261491 |
| 7.16E-05    | -0.011921989 | 0.805288429 | -0.167879108 | 0.000472423 |
| 0.020295654 | 0.048763782  | 0.313049395 | -0.349444576 | 8.54E-14    |
| 9.44E-07    | -0.021026704 | 0.663709137 | -0.37763153  | 5.05E-16    |
| 0.019036493 | 0.086540792  | 0.073022688 | -0.334600621 | 1.04E-12    |
| 1.64E-07    | 0.071462417  | 0.13901883  | 0.319042181  | 1.25E-11    |
| 0.464475001 | -0.229898714 | 1.45E-06    | 0.151931136  | 0.001579305 |
| 0.397408327 | 0.11603846   | 0.016068415 | 0.013612678  | 0.778350033 |
| 6.96E-11    | -0.430528438 | 7.85E-21    | -0.034765266 | 0.472124406 |
| 0.067691393 | 0.205353012  | 1.77E-05    | -0.096279685 | 0.046007552 |
| 0.00947656  | 0.060300761  | 0.212060643 | -0.102267674 | 0.034001326 |
| 3.03E-14    | 0.212863123  | 8.50E-06    | 0.076949567  | 0.111075269 |
| 0.965988384 | 0.072225157  | 0.134839679 | -0.330274337 | 2.11E-12    |
| 0.552320122 | 0.10022977   | 0.037746859 | 0.098277626  | 0.041657119 |
| 0.000107131 | 0.101111379  | 0.03608564  | 0.17185986   | 0.000343516 |
| 0.525143407 | 0.043120436  | 0.372405509 | 0.145605754  | 0.002472375 |
| 7.96E-06    | 0.073944447  | 0.125774873 | 0.195255816  | 4.57E-05    |
| 0.010058821 | -0.008116778 | 0.866720235 | 0.302241485  | 1.56E-10    |
| 0.522143279 | 0.169557061  | 0.000413401 | -0.048349996 | 0.317178167 |
| 6.89E-07    | 0.025589998  | 0.596675377 | 0.137050751  | 0.004411698 |
| 0.001701969 | 0.090006118  | 0.062215043 | -0.083779024 | 0.082692353 |
| 0.231001075 | 0.057455232  | 0.234466694 | -0.019989068 | 0.679359817 |
| 0.513850133 | -0.001154935 | 0.9809487   | -0.136962595 | 0.004437388 |
| 0.824483361 | 0.274720808  | 6.96E-09    | -0.289162873 | 9.98E-10    |
| 0.016904008 | 0.083985574  | 0.081935087 | 0.209910831  | 1.14E-05    |
| 1.59E-14    | 0.261201753  | 3.88E-08    | 0.018945185  | 0.695244921 |
| 1.06E-08    | 0.139398789  | 0.003775016 | -0.062174945 | 0.198171198 |
| 2.34E-11    | 0.139938528  | 0.00364097  | 0.450662432  | 6.75E-23    |
| 0.298096876 | 0.014565325  | 0.763285018 | -0.335255465 | 9.37E-13    |
| 1.34E-08    | -0.159305375 | 0.000916415 | -0.077157465 | 0.110110557 |
| 9.09E-17    | -0.064681078 | 0.180650983 | 0.0742587    | 0.124170364 |
| 0.000163152 | 0.035976943  | 0.456814112 | 0.194367956  | 4.96E-05    |
| 0.131363614 | 0.301927796  | 1.63E-10    | -0.200898812 | 2.71E-05    |
| 0.79625299  | 0.126026063  | 0.008892399 | 0.218291276  | 4.91E-06    |
| 8.05E-05    | 0.035976818  | 0.456815685 | -0.163145768 | 0.000683797 |
| 6.18E-10    | 0.328820809  | 2.67E-12    | -0.102918792 | 0.03287342  |
| 0.508984863 | 0.384846643  | 1.25E-16    | -0.181146688 | 0.000158924 |
| 0.184514348 | -0.058857193 | 0.223226957 | 0.072886014  | 0.13129759  |



|             |              |             |              |             |
|-------------|--------------|-------------|--------------|-------------|
| 0.001201931 | 0.195466339  | 4.49E-05    | -0.31937721  | 1.19E-11    |
| 0.01741225  | 0.198730535  | 3.32E-05    | -0.090441944 | 0.06095432  |
| 7.98E-06    | 0.092488285  | 0.055313624 | -0.003530957 | 0.941800884 |
| 0.009187972 | 0.05771339   | 0.232367548 | 0.232637094  | 1.08E-06    |
| 0.000379131 | 0.049827736  | 0.302595821 | 0.027255894  | 0.572992499 |
| 7.74E-06    | 0.226704752  | 2.04E-06    | 0.218628775  | 4.74E-06    |
| 1.41E-07    | -0.211654591 | 9.58E-06    | -0.159699497 | 0.000889551 |
| 9.13E-06    | 0.283552503  | 2.15E-09    | -0.2705467   | 1.19E-08    |
| 0.761216467 | 0.418805033  | 1.09E-19    | -0.112561091 | 0.019556672 |
| 0.553892504 | 0.123102303  | 0.010618845 | -0.162630713 | 0.00071145  |
| 2.77E-21    | -0.075760928 | 0.11671921  | -0.317056705 | 1.70E-11    |
| 7.97E-05    | 0.226888125  | 2.00E-06    | 0.106339535  | 0.027458299 |
| 6.99E-07    | -0.140025597 | 0.003619754 | 0.074406056  | 0.123423496 |
| 0.002678023 | 0.157650513  | 0.001037596 | 0.482561533  | 1.83E-26    |
| 2.72E-07    | -0.130557059 | 0.00670764  | -0.189802999 | 7.48E-05    |
| 0.399971427 | 0.0801604    | 0.096899329 | 0.259590509  | 4.73E-08    |
| 6.81E-18    | 0.29686851   | 3.38E-10    | 0.054368759  | 0.260603851 |
| 0.007143606 | 0.032905483  | 0.49616215  | 0.286883656  | 1.37E-09    |
| 0.016214305 | 0.333601468  | 1.23E-12    | -0.177800707 | 0.000210733 |
| 0.395477251 | -0.002994558 | 0.950629842 | -0.38787801  | 6.89E-17    |
| 6.63E-17    | -0.167898702 | 0.000471691 | 0.131052243  | 0.006500746 |
| 8.07E-10    | 0.505047384  | 3.25E-29    | 0.096795029  | 0.044850441 |
| 0.026860437 | -0.228812332 | 1.63E-06    | -0.098109858 | 0.042008566 |
| 0.044385419 | -0.14355782  | 0.002848026 | 0.196385661  | 4.12E-05    |
| 2.14E-06    | 0.01270635   | 0.792760143 | -0.14410021  | 0.002743784 |
| 5.05E-16    | 0.158681721  | 0.00096046  | 0.056389278  | 0.243275858 |
| 0.099899988 | -0.110561355 | 0.02184747  | 0.107072155  | 0.026403938 |
| 0.002792345 | 0.125531834  | 0.009165417 | -0.182821486 | 0.00013773  |
| 1.30E-07    | -0.028429181 | 0.556584062 | 0.137930128  | 0.00416269  |
| 1.08E-06    | 0.121147758  | 0.011932739 | 0.311992752  | 3.67E-11    |
| 0.054637829 | 0.148645007  | 0.001997642 | -0.133081286 | 0.005711448 |
| 0.001017631 | -0.081800233 | 0.090237109 | 0.196880258  | 3.94E-05    |
| 0.577043338 | 0.026864192  | 0.578520934 | -0.094180014 | 0.050984137 |
| 0.000163475 | 0.219795243  | 4.21E-06    | -0.264176242 | 2.68E-08    |
| 4.51E-05    | 0.238773328  | 5.46E-07    | 0.17529179   | 0.00025953  |
| 0.977914382 | 0.055523041  | 0.250603291 | -0.176857151 | 0.000227979 |
| 0.393233697 | 0.45823531   | 1.04E-23    | -0.101361438 | 0.035625916 |
| 2.63E-11    | 0.042559519  | 0.378662711 | -0.251793654 | 1.21E-07    |
| 3.62E-06    | 0.062905932  | 0.192937638 | -0.237982399 | 5.96E-07    |
| 0.000269111 | 0.164037763  | 0.000638248 | -0.113081864 | 0.018995566 |
| 0.205197226 | 0.213904206  | 7.66E-06    | -0.374569279 | 9.05E-16    |
| 0.019597586 | 0.035298209  | 0.465355874 | -0.298493251 | 2.68E-10    |
| 0.000144597 | 0.249837482  | 1.53E-07    | -0.379074757 | 3.83E-16    |
| 6.85E-24    | 0.034087869  | 0.480804993 | 0.338180219  | 5.78E-13    |
| 0.64590809  | -0.039557801 | 0.413231259 | -0.066971593 | 0.165665455 |
| 0.00446827  | -0.01597655  | 0.741132857 | -0.079598172 | 0.099271737 |
| 5.34E-10    | 0.073977546  | 0.125605121 | -0.020024386 | 0.678824794 |
| 2.01E-07    | 0.024119048  | 0.617948521 | 0.158987875  | 0.0009386   |
| 0.05148509  | 0.068828357  | 0.154217701 | -0.275219472 | 6.52E-09    |
| 0.097725847 | 0.111479195  | 0.020768644 | -0.040889907 | 0.397666125 |
| 0.000253417 | -0.198736234 | 3.32E-05    | 0.099520934  | 0.039129123 |

|             |              |             |              |             |
|-------------|--------------|-------------|--------------|-------------|
| 0.011030542 | 0.25745125   | 6.14E-08    | -0.16527689  | 0.000579629 |
| 0.201674896 | -0.037248677 | 0.441048408 | -0.236996328 | 6.66E-07    |
| 0.471869586 | -0.019594938 | 0.685341224 | -0.029709373 | 0.538945081 |
| 5.07E-06    | 0.05071958   | 0.294013559 | -0.238118809 | 5.87E-07    |
| 1.75E-16    | -0.097083306 | 0.044213903 | 0.198537968  | 3.38E-05    |
| 1.19E-08    | 0.212706201  | 8.63E-06    | -0.015534052 | 0.748056793 |
| 0.050273989 | 0.500644009  | 1.17E-28    | -0.139277303 | 0.003805797 |
| 0.710264742 | 0.068551586  | 0.155885066 | -0.105522985 | 0.028675907 |
| 1.84E-09    | 0.016285079  | 0.736317481 | 0.080252513  | 0.096514988 |
| 0.366477661 | 0.126103136  | 0.008850482 | -0.069399116 | 0.150821946 |
| 0.055287742 | 0.154750483  | 0.00128618  | 0.394152503  | 1.96E-17    |
| 0.000276346 | 0.202200094  | 2.40E-05    | -0.37612114  | 6.74E-16    |
| 0.739891333 | 0.047415079  | 0.326637241 | 0.095237842  | 0.048423448 |
| 0.314448809 | 0.110831324  | 0.021525215 | 0.382106957  | 2.14E-16    |
| 0.870632241 | -0.262660675 | 3.24E-08    | -0.055442602 | 0.251291426 |
| 0.724592049 | 0.178370383  | 0.00020092  | 0.210901081  | 1.03E-05    |
| 0.00012159  | 0.199218271  | 3.17E-05    | -0.155684355 | 0.001200711 |
| 2.54E-05    | 0.009339212  | 0.846878693 | -0.384783447 | 1.27E-16    |
| 0.002868315 | -0.067583153 | 0.161826608 | 0.026901394  | 0.577994804 |
| 1.84E-19    | 0.066730711  | 0.167196101 | 0.322958511  | 6.78E-12    |
| 0.965383646 | 0.028289793  | 0.558521405 | -0.263922826 | 2.77E-08    |
| 4.43E-07    | 0.258757732  | 5.24E-08    | -0.012990173 | 0.788239672 |
| 0.285835721 | 0.137851973  | 0.004184294 | -0.265885696 | 2.16E-08    |
| 0.007990089 | -0.109801851 | 0.022776606 | 0.116926191  | 0.015270402 |
| 9.06E-09    | 0.102013225  | 0.034450971 | -0.262941593 | 3.13E-08    |
| 0.233152235 | -0.020342648 | 0.674010858 | -0.173298219 | 0.000305628 |
| 1.57E-11    | 0.243654571  | 3.14E-07    | -0.040924858 | 0.397262533 |
| 0.20500408  | 0.002116801  | 0.965089983 | -0.29008111  | 8.79E-10    |
| 0.586828474 | 0.148447545  | 0.00202575  | -0.074190742 | 0.124515986 |
| 0.194548568 | 0.282099403  | 2.62E-09    | -0.06678625  | 0.166842251 |
| 0.150759213 | -0.256788557 | 6.66E-08    | -0.074311318 | 0.123903272 |
| 0.147424258 | 0.060562821  | 0.210077458 | -0.049893818 | 0.301954268 |
| 1.24E-16    | -0.103269448 | 0.032279328 | 0.12329556   | 0.010496173 |
| 2.15E-12    | -0.155784728 | 0.001191842 | 0.188767357  | 8.20E-05    |
| 2.06E-10    | 0.019044259  | 0.693731408 | 0.390573274  | 4.03E-17    |
| 0.005592859 | 0.164272658  | 0.000626731 | 0.176391887  | 0.000236961 |
| 1.04E-11    | -0.132152968 | 0.006061204 | 0.197471466  | 3.73E-05    |
| 0.981091707 | 0.00296575   | 0.951104181 | 0.138157984  | 0.004100277 |
| 0.530135412 | 0.128828774  | 0.00747674  | -0.248676119 | 1.75E-07    |
| 0.972776745 | 0.03077078   | 0.524535412 | -0.000946871 | 0.984380348 |
| 1.20E-25    | 0.131208846  | 0.006436516 | -0.077251266 | 0.109677453 |
| 1.33E-07    | -0.139664664 | 0.003708436 | 0.205061758  | 1.82E-05    |
| 2.05E-10    | -0.097903973 | 0.042443273 | 0.002962443  | 0.951158643 |
| 0.000176286 | 0.120955946  | 0.012069114 | 0.369195323  | 2.48E-15    |
| 4.53E-10    | 0.065600229  | 0.174521277 | 0.321447159  | 8.59E-12    |
| 0.314717176 | 0.483875853  | 1.28E-26    | -0.043683207 | 0.366192209 |
| 0.000446498 | 0.007835037  | 0.871305592 | 0.265891873  | 2.16E-08    |
| 1.27E-05    | -0.21952284  | 4.33E-06    | -0.048602857 | 0.314650896 |
| 0.429629487 | -0.032571872 | 0.500541865 | -0.273208416 | 8.47E-09    |
| 0.760825139 | -0.008931591 | 0.853484752 | 0.240484712  | 4.50E-07    |
| 0.910548464 | 0.423632905  | 3.73E-20    | -0.039831236 | 0.410007274 |

|             |              |             |              |             |
|-------------|--------------|-------------|--------------|-------------|
| 0.056711868 | 0.345856639  | 1.58E-13    | 0.051012041  | 0.291234968 |
| 0.53739577  | 0.124207261  | 0.009934244 | -0.236844745 | 6.77E-07    |
| 0.008612561 | 0.087129124  | 0.071086803 | 0.157042083  | 0.001085746 |
| 0.312400784 | 0.195068103  | 4.65E-05    | -0.151261726 | 0.001657365 |
| 0.004290208 | 0.025570937  | 0.596948899 | -0.02702855  | 0.576198172 |
| 0.911252503 | 0.043178841  | 0.371757676 | -0.014950561 | 0.757217868 |
| 0.519997353 | 0.033967621  | 0.482354926 | -0.309217715 | 5.57E-11    |
| 6.51E-07    | 0.237176627  | 6.52E-07    | 0.08269559   | 0.086757572 |
| 0.000349391 | -0.057461934 | 0.234412029 | 0.425225825  | 2.61E-20    |
| 1.62E-05    | 0.153352451  | 0.001424629 | -0.068792955 | 0.154430224 |
| 0.001201697 | 0.037093486  | 0.442955503 | 0.357506693  | 2.07E-14    |
| 0.250745078 | 0.021417802  | 0.657847467 | 0.235945067  | 7.48E-07    |
| 0.041845451 | -0.222517197 | 3.17E-06    | -0.2190308   | 4.55E-06    |
| 0.437752793 | 0.046753646  | 0.333438503 | -0.216299283 | 6.01E-06    |
| 8.00E-14    | 0.11704203   | 0.015168878 | 0.164514276  | 0.000615084 |
| 3.92E-11    | -0.136704436 | 0.004513398 | -0.233153255 | 1.02E-06    |
| 0.809373965 | 0.418641831  | 1.13E-19    | 0.055428108  | 0.251415566 |
| 2.22E-05    | 0.216595584  | 5.84E-06    | -0.239450089 | 5.06E-07    |
| 6.64E-33    | 0.048582085  | 0.314858006 | -0.292010405 | 6.71E-10    |
| 0.926863795 | -0.202864096 | 2.25E-05    | 0.113711611  | 0.018335826 |
| 7.10E-05    | 0.092755182  | 0.054610952 | -0.28869668  | 1.06E-09    |
| 0.047862163 | 0.047416471  | 0.326623019 | -0.504858854 | 3.44E-29    |
| 0.0007889   | -0.132402578 | 0.005965319 | 0.153596675  | 0.001399497 |
| 0.810942895 | 0.031067011  | 0.520549161 | -0.22138134  | 3.57E-06    |
| 1.54E-06    | 0.129832004  | 0.007021222 | 0.128061812  | 0.007842604 |
| 3.73E-11    | -0.015160073 | 0.753924443 | -0.324094505 | 5.67E-12    |
| 4.09E-06    | -0.050987639 | 0.291466127 | -0.018696089 | 0.699055601 |
| 0.565683766 | 0.23398802   | 9.28E-07    | -0.215305304 | 6.65E-06    |
| 5.84E-08    | -0.00919407  | 0.849229709 | 0.073850187  | 0.126259267 |
| 0.454242722 | -0.025774254 | 0.594034206 | -0.507923704 | 1.40E-29    |
| 0.000751282 | 0.074826029  | 0.121314059 | -0.181276767 | 0.000157174 |
| 0.01496838  | 0.119066711  | 0.013487623 | -0.116056573 | 0.016051775 |
| 5.07E-05    | 0.062663107  | 0.194664819 | 0.314498487  | 2.51E-11    |
| 3.45E-10    | -0.002320891 | 0.961726613 | 0.078730909  | 0.103021597 |
| 0.499177557 | -0.009353375 | 0.846649339 | -0.161676882 | 0.000765413 |
| 4.20E-08    | 0.146974788  | 0.002247068 | -0.098577184 | 0.041035762 |
| 2.76E-08    | -0.036551022 | 0.449658491 | 0.283152344  | 2.27E-09    |
| 1.91E-12    | -0.029676112 | 0.539399802 | 0.433676868  | 3.81E-21    |
| 0.020660898 | 0.139958818  | 0.003636016 | -0.153935905 | 0.001365263 |
| 2.41E-09    | -0.089358607 | 0.064127742 | 0.096425132  | 0.045678469 |
| 0.183245623 | 0.052970042  | 0.273086474 | -0.19309555  | 5.57E-05    |
| 0.732569638 | -0.115413094 | 0.016652292 | 0.228459954  | 1.69E-06    |
| 0.000721354 | 0.027125145  | 0.574835105 | -0.17300618  | 0.00031299  |
| 2.63E-06    | 0.171381965  | 0.000357043 | -0.009851109 | 0.838597903 |
| 0.006366372 | 0.019345383  | 0.689138752 | -0.385807602 | 1.04E-16    |
| 0.336056458 | 0.202016527  | 2.44E-05    | -0.116264647 | 0.015861694 |
| 0.591390792 | -0.136578027 | 0.004551045 | 0.114526977  | 0.017511379 |
| 0.000147055 | 0.252076128  | 1.17E-07    | -0.211699964 | 9.54E-06    |
| 0.056580439 | 0.245675125  | 2.48E-07    | -0.059617244 | 0.217296627 |
| 0.036939461 | -0.006175946 | 0.898389896 | -0.333947466 | 1.16E-12    |
| 0.061811724 | 0.025386368  | 0.599600428 | 0.408608032  | 9.82E-19    |

|             |              |             |              |             |
|-------------|--------------|-------------|--------------|-------------|
| 0.002382878 | -0.002650853 | 0.956290358 | -0.425829804 | 2.28E-20    |
| 0.955582111 | 0.151794665  | 0.00159494  | 0.006456803  | 0.893795778 |
| 0.000794496 | 0.05478909   | 0.256930773 | 0.185587881  | 0.00010843  |
| 0.067443518 | 0.252617236  | 1.10E-07    | 0.188262409  | 8.58E-05    |
| 3.37E-11    | 0.032922314  | 0.495941727 | 0.043943031  | 0.363345485 |
| 0.618304423 | -0.114630987 | 0.017408576 | 0.013783899  | 0.775636062 |
| 0.800864394 | 0.167443924  | 0.000488962 | -0.223608221 | 2.83E-06    |
| 0.896479387 | 0.087763004  | 0.069048178 | 0.387332133  | 7.68E-17    |
| 0.01127853  | 0.313035509  | 3.14E-11    | -0.008550176 | 0.859675424 |
| 5.65E-05    | 0.082170971  | 0.088783008 | -0.444449189 | 3.03E-22    |
| 0.218516354 | 0.073214103  | 0.129565999 | -0.396680121 | 1.18E-17    |
| 0.074798353 | 0.181468239  | 0.000154631 | -0.102818073 | 0.033045776 |
| 0.260855123 | 0.074224758  | 0.124342894 | 0.320328841  | 1.02E-11    |
| 1.59E-05    | 0.06782582   | 0.160322037 | 0.323435114  | 6.29E-12    |
| 0.363951091 | 0.11085579   | 0.021496216 | -0.216587693 | 5.84E-06    |
| 0.002217172 | 0.110699059  | 0.021682577 | 0.114371802  | 0.01766574  |
| 3.70E-21    | 0.235655573  | 7.72E-07    | 0.039916393  | 0.409006276 |
| 0.865836273 | 0.125417478  | 0.009229641 | -0.175281018 | 0.000259761 |
| 0.075833445 | 0.0880015    | 0.068293648 | -0.23812909  | 5.86E-07    |
| 0.067347037 | 0.04052258   | 0.401922631 | -0.2912721   | 7.44E-10    |
| 0.065050952 | -0.128067193 | 0.007839983 | -0.073226796 | 0.129499362 |
| 0.114942432 | 0.051218013  | 0.289288669 | -0.153998014 | 0.00135908  |
| 0.000562766 | 0.387315449  | 7.70E-17    | -0.176351107 | 0.000237763 |
| 2.33E-07    | 0.126354371  | 0.008715063 | 0.359839347  | 1.37E-14    |
| 0.005658058 | 0.167905187  | 0.000471449 | -0.085266169 | 0.077364349 |
| 0.122320524 | 0.153917463  | 0.001367105 | -0.168492714 | 0.000449986 |
| 0.409339775 | 0.279622922  | 3.64E-09    | 0.105969584  | 0.028004337 |
| 0.000448703 | 0.159751633  | 0.000886052 | 0.281216765  | 2.94E-09    |
| 0.042115209 | 0.177147299  | 0.00022254  | -0.340118821 | 4.18E-13    |
| 1.86E-11    | -0.029059517 | 0.547864071 | 0.301925235  | 1.63E-10    |
| 0.025416663 | 0.092118305  | 0.056300088 | -0.251041912 | 1.33E-07    |
| 0.65596703  | 0.109419049  | 0.023257736 | -0.13253745  | 0.005914077 |
| 0.150877423 | 0.114564303  | 0.017474426 | -0.090609635 | 0.060474887 |
| 0.014113694 | 0.026441477  | 0.584514968 | -0.215850464 | 6.29E-06    |
| 3.44E-10    | -0.013930495 | 0.773314575 | 0.208572038  | 1.30E-05    |
| 0.019195444 | 0.164509994  | 0.000615289 | 0.109137973  | 0.023616587 |
| 0.003935437 | 0.267484293  | 1.77E-08    | -0.044814038 | 0.353903453 |
| 4.38E-05    | 0.017433576  | 0.718484164 | 0.332706453  | 1.42E-12    |
| 0.742324531 | 0.179281676  | 0.000186107 | -0.261155599 | 3.90E-08    |
| 0.489961959 | 0.042950148  | 0.374298342 | -0.136089712 | 0.004699148 |
| 0.000734174 | 0.088799916  | 0.065816712 | -0.177313526 | 0.000219479 |
| 3.90E-06    | -0.012159154 | 0.801494872 | 0.362119302  | 9.06E-15    |
| 0.213425537 | 0.065368736  | 0.176050294 | -0.19372297  | 5.26E-05    |
| 0.00085139  | 0.046857272  | 0.33236698  | 0.340422025  | 3.97E-13    |
| 0.777035139 | -0.099128675 | 0.039912294 | -0.355511365 | 2.95E-14    |
| 0.618701037 | 0.141120228  | 0.003362429 | 0.266681979  | 1.95E-08    |
| 0.311132236 | -0.012348269 | 0.798473219 | 0.181447678  | 0.000154903 |
| 5.01E-11    | 0.040133585  | 0.406459795 | -0.393971468 | 2.04E-17    |
| 0.358909707 | -0.039794689 | 0.410437323 | -0.152220466 | 0.001546622 |
| 0.667462228 | -0.066951569 | 0.16579229  | -0.29690325  | 3.36E-10    |
| 0.027329763 | 0.190895916  | 6.79E-05    | 0.229287418  | 1.55E-06    |

|              |               |              |               |              |
|--------------|---------------|--------------|---------------|--------------|
| 0. 87348085  | 0. 058651802  | 0. 224849147 | -0. 323877095 | 5. 86E-12    |
| 1. 80E-05    | -0. 029107268 | 0. 547206244 | 0. 200328432  | 2. 86E-05    |
| 6. 27E-14    | 0. 081414852  | 0. 091768823 | -0. 053383501 | 0. 26935493  |
| 1. 67E-06    | 0. 163723764  | 0. 000653951 | -0. 042112306 | 0. 383697418 |
| 3. 66E-11    | -0. 04658696  | 0. 335166723 | 0. 22043798   | 3. 94E-06    |
| 0. 465810812 | 0. 109495424  | 0. 023161047 | -0. 136684956 | 0. 004519182 |
| 1. 25E-09    | -0. 055047886 | 0. 254687167 | -0. 070605756 | 0. 143830301 |
| 0. 000710297 | 0. 038133572  | 0. 430264147 | -0. 0944802   | 0. 050246243 |
| 0. 000264488 | -0. 06202239  | 0. 199276353 | 0. 293774414  | 5. 24E-10    |
| 0. 336095859 | 0. 337515863  | 6. 45E-13    | 0. 014082665  | 0. 770906963 |
| 0. 002333805 | 0. 014677317  | 0. 761519725 | 0. 434957753  | 2. 83E-21    |
| 0. 01334399  | 0. 081611008  | 0. 090986609 | 0. 152556997  | 0. 001509389 |
| 0. 003083222 | -0. 025368617 | 0. 599855724 | -0. 235607483 | 7. 77E-07    |
| 2. 10E-15    | -0. 026464402 | 0. 584189153 | -0. 16574533  | 0. 000558801 |
| 4. 35E-05    | 0. 230724053  | 1. 33E-06    | 0. 235429791  | 7. 92E-07    |
| 2. 49E-11    | -0. 073666655 | 0. 127206576 | 0. 357068895  | 2. 24E-14    |
| 2. 70E-10    | -0. 002661469 | 0. 956115489 | -0. 070093948 | 0. 146765016 |
| 0. 629458042 | -0. 016259511 | 0. 736716143 | -0. 398012006 | 8. 95E-18    |
| 0. 9870553   | -0. 011398433 | 0. 813678989 | -0. 18823423  | 8. 60E-05    |
| 7. 87E-06    | 0. 206468919  | 1. 59E-05    | 0. 071082769  | 0. 141135677 |
| 0. 001650893 | 0. 119939135  | 0. 012815285 | -0. 282491408 | 2. 48E-09    |
| 0. 851563209 | -0. 07574483  | 0. 116797158 | 0. 041276632  | 0. 393214222 |
| 0. 004463528 | -0. 015343405 | 0. 751046219 | -0. 322035985 | 7. 83E-12    |
| 0. 000487529 | 0. 003033705  | 0. 949985274 | -0. 270787724 | 1. 16E-08    |
| 4. 38E-08    | 0. 146276323  | 0. 002359563 | -0. 000381312 | 0. 993709521 |
| 0. 00198012  | 0. 085229662  | 0. 077491721 | -0. 074218698 | 0. 124373715 |
| 0. 804530477 | 0. 039863753  | 0. 409624875 | 0. 345275419  | 1. 75E-13    |
| 0. 066657963 | 0. 012815254  | 0. 791024784 | 0. 24714284   | 2. 10E-07    |
| 2. 96E-05    | 0. 023121433  | 0. 632561571 | -0. 326398795 | 3. 93E-12    |
| 0. 386292585 | -0. 004675374 | 0. 922989317 | -0. 385616883 | 1. 08E-16    |
| 0. 000225774 | 0. 130214004  | 0. 006854411 | 0. 078169865  | 0. 105506637 |
| 0. 723152588 | 0. 022693565  | 0. 638873503 | -0. 34058354  | 3. 87E-13    |
| 0. 002825503 | 0. 214309837  | 7. 35E-06    | -0. 111987371 | 0. 020191476 |
| 1. 98E-09    | 0. 007020615  | 0. 88458409  | -0. 347169305 | 1. 26E-13    |
| 0. 640311628 | -0. 012975858 | 0. 788467504 | -0. 395237582 | 1. 58E-17    |
| 0. 140220584 | 0. 118058407  | 0. 014303204 | 0. 378428273  | 4. 34E-16    |
| 0. 83963102  | 0. 177233209  | 0. 000220953 | 0. 109045548  | 0. 023735628 |
| 5. 90E-10    | -0. 207238533 | 1. 48E-05    | 0. 026313775  | 0. 586331412 |
| 1. 55E-10    | -0. 144312736 | 0. 002703895 | 0. 073495208  | 0. 128096483 |
| 0. 802861962 | 0. 014792399  | 0. 759707013 | -0. 303382476 | 1. 32E-10    |
| 0. 007751406 | 0. 245289267  | 2. 60E-07    | 0. 086138518  | 0. 074370937 |
| 3. 64E-07    | 0. 045849573  | 0. 342880917 | 0. 313968686  | 2. 72E-11    |
| 3. 43E-06    | 0. 060206725  | 0. 212775558 | 0. 124235658  | 0. 009917178 |
| 0. 006167199 | 0. 109088174  | 0. 023680663 | -0. 035943453 | 0. 457233518 |
| 1. 75E-05    | 0. 103340293  | 0. 03216042  | -0. 061712864 | 0. 201532435 |
| 4. 06E-25    | 0. 300307672  | 2. 06E-10    | 0. 100766731  | 0. 036727516 |
| 0. 803159949 | -0. 006793436 | 0. 888293988 | -0. 183356036 | 0. 000131545 |
| 2. 64E-07    | 0. 118504632  | 0. 013937068 | 0. 283311653  | 2. 22E-09    |
| 0. 011413584 | 0. 015747613  | 0. 744712556 | 0. 304956729  | 1. 05E-10    |
| 0. 000309274 | -0. 15747405  | 0. 001051354 | -0. 131371565 | 0. 006370382 |
| 4. 68E-15    | -0. 259440969 | 4. 82E-08    | 0. 124255032  | 0. 009905551 |

|              |               |              |               |              |
|--------------|---------------|--------------|---------------|--------------|
| 1. 09E-06    | -0. 001414568 | 0. 976667006 | -0. 402797646 | 3. 33E-18    |
| 0. 030388197 | 0. 022863469  | 0. 636363925 | -0. 425649595 | 2. 37E-20    |
| 5. 65E-05    | 0. 168607499  | 0. 0004459   | 0. 090069505  | 0. 062030356 |
| 0. 000859664 | 0. 039516535  | 0. 413719097 | 0. 33613582   | 8. 11E-13    |
| 7. 43E-11    | 0. 267446568  | 1. 77E-08    | 0. 090264902  | 0. 061463885 |
| 0. 009041928 | 0. 14774813   | 0. 002128242 | 0. 245547763  | 2. 52E-07    |
| 1. 49E-16    | 0. 04233426   | 0. 381193591 | 0. 21180502   | 9. 44E-06    |
| 0. 001989743 | 0. 076056458  | 0. 115295421 | -0. 261569786 | 3. 71E-08    |
| 1. 63E-11    | 0. 227529966  | 1. 87E-06    | -0. 077418104 | 0. 108910437 |
| 0. 000518503 | 0. 173509468  | 0. 000300404 | 0. 311541978  | 3. 93E-11    |
| 0. 013209245 | 0. 090624778  | 0. 060431748 | -0. 046581787 | 0. 335220459 |
| 0. 00082983  | -0. 329150972 | 2. 53E-12    | -0. 044702213 | 0. 355106957 |
| 0. 739199341 | 0. 049131437  | 0. 309410624 | -0. 199007581 | 3. 23E-05    |
| 0. 617889849 | 0. 29857064   | 2. 65E-10    | -0. 110824723 | 0. 021533045 |
| 0. 666160623 | 0. 302772561  | 1. 44E-10    | -0. 086241062 | 0. 07402534  |
| 4. 01E-22    | 0. 217031071  | 5. 58E-06    | 0. 106391254  | 0. 027382698 |
| 1. 65E-07    | 0. 196381122  | 4. 12E-05    | -0. 176688607 | 0. 000231195 |
| 0. 096053794 | 0. 370016107  | 2. 13E-15    | -0. 188810705 | 8. 17E-05    |
| 0. 056639183 | 0. 061105212  | 0. 206015384 | -0. 108855313 | 0. 023982278 |
| 0. 181091672 | 0. 353582289  | 4. 15E-14    | -0. 207362061 | 1. 46E-05    |
| 0. 038747679 | -0. 299143777 | 2. 44E-10    | -0. 028710412 | 0. 552685227 |
| 7. 04E-11    | -0. 056417165 | 0. 243042491 | 0. 310133008  | 4. 86E-11    |
| 0. 05676409  | -0. 015898895 | 0. 742346465 | 0. 347990612  | 1. 10E-13    |
| 6. 33E-06    | -0. 326866343 | 3. 65E-12    | 0. 116067555  | 0. 016041692 |
| 0. 00844093  | 0. 157964167  | 0. 00101355  | -0. 120785869 | 0. 012191184 |
| 0. 000128441 | 0. 085107783  | 0. 077918192 | 0. 000810838  | 0. 986624131 |
| 0. 152908359 | 0. 05581479   | 0. 24811846  | -0. 146715734 | 0. 002288207 |
| 0. 364477777 | -0. 064419866 | 0. 182421707 | -0. 011765827 | 0. 807788807 |
| 6. 78E-06    | -0. 038976915 | 0. 420129727 | -0. 416122319 | 1. 95E-19    |
| 3. 95E-09    | -0. 075596837 | 0. 117515676 | 0. 213411555  | 8. 04E-06    |
| 0. 974835701 | 0. 178995248  | 0. 000190649 | -0. 013701362 | 0. 776943989 |
| 0. 022931043 | 0. 058738798  | 0. 224161023 | -0. 113307388 | 0. 018756962 |
| 0. 015390052 | 0. 000811537  | 0. 986612602 | 0. 040230286  | 0. 405329058 |
| 0. 419017465 | 0. 442271085  | 5. 09E-22    | -0. 051091026 | 0. 290487573 |
| 3. 40E-06    | 0. 075330878  | 0. 118815615 | -0. 027508269 | 0. 569443801 |
| 0. 516936149 | 0. 006079206  | 0. 899973109 | 0. 4079314    | 1. 13E-18    |
| 0. 047145729 | -0. 000636633 | 0. 989497694 | 0. 165503887  | 0. 000569448 |
| 0. 45325486  | -0. 253560156 | 9. 82E-08    | 0. 048423163  | 0. 316445527 |
| 0. 093354878 | 0. 108216794  | 0. 024826414 | -0. 058844807 | 0. 223324544 |
| 0. 019915191 | -0. 128456851 | 0. 00765221  | 0. 461742272  | 4. 29E-24    |
| 1. 63E-13    | 0. 040540477  | 0. 401714621 | 0. 221161847  | 3. 65E-06    |
| 3. 48E-07    | 0. 075445227  | 0. 118255338 | -0. 000305132 | 0. 994966238 |
| 7. 09E-06    | 0. 279542355  | 3. 68E-09    | 0. 166418235  | 0. 000530094 |
| 0. 062286454 | 0. 029039297  | 0. 548142753 | 0. 181722428  | 0. 000151315 |
| 0. 000248712 | 0. 051864716  | 0. 28323461  | -0. 072043816 | 0. 135824393 |
| 4. 64E-06    | 0. 15034413   | 0. 001770119 | -0. 134548909 | 0. 005195397 |
| 0. 430698071 | 0. 26891569   | 1. 47E-08    | -0. 116067181 | 0. 016042036 |
| 0. 108795832 | 0. 07951581   | 0. 09962312  | 0. 104986552  | 0. 029500793 |
| 0. 00219945  | 0. 084058395  | 0. 081669448 | 0. 386303706  | 9. 40E-17    |
| 0. 352728983 | 0. 163837373  | 0. 000648229 | -0. 163096953 | 0. 000686374 |
| 0. 440683025 | 0. 116474695  | 0. 015671815 | -0. 236883242 | 6. 74E-07    |

|              |               |              |               |              |
|--------------|---------------|--------------|---------------|--------------|
| 1. 82E-15    | -0. 167915257 | 0. 000471073 | 0. 086218108  | 0. 074102589 |
| 3. 94E-09    | 0. 102156171  | 0. 034197748 | 0. 209786218  | 1. 15E-05    |
| 0. 149986801 | 0. 118967895  | 0. 0135657   | -0. 359941994 | 1. 34E-14    |
| 0. 692746002 | -0. 112578963 | 0. 01953718  | 0. 349673995  | 8. 21E-14    |
| 9. 04E-18    | 0. 005243394  | 0. 913667623 | -0. 425474193 | 2. 47E-20    |
| 0. 000528194 | -0. 189802782 | 7. 48E-05    | 0. 022387099  | 0. 643410613 |
| 0. 082350312 | -0. 028685218 | 0. 553033967 | 0. 009842302  | 0. 838740218 |
| 3. 18E-14    | 0. 119089797  | 0. 013469439 | 0. 095482607  | 0. 04784653  |
| 2. 92E-10    | 0. 031969846  | 0. 508496799 | -0. 290586532 | 8. 19E-10    |
| 0. 002814942 | 0. 234110487  | 9. 16E-07    | -0. 113254051 | 0. 018813156 |
| 1. 25E-06    | 0. 206633462  | 1. 57E-05    | 0. 011135526  | 0. 817900492 |
| 0. 078915622 | -0. 326843872 | 3. 66E-12    | -0. 040890301 | 0. 397661572 |
| 0. 007244022 | -0. 323770764 | 5. 96E-12    | 0. 0025021    | 0. 958740886 |
| 0. 002390622 | 0. 118378405  | 0. 014039794 | 0. 440501323  | 7. 74E-22    |
| 0. 323766508 | 0. 019831134  | 0. 681754272 | -0. 371603187 | 1. 58E-15    |
| 4. 45E-11    | 0. 034675816  | 0. 473265721 | -0. 359009084 | 1. 59E-14    |
| 0. 423337702 | 0. 047715542  | 0. 323577572 | 0. 241212113  | 4. 14E-07    |
| 0. 036581342 | -0. 301687015 | 1. 69E-10    | -0. 058046703 | 0. 229677004 |
| 0. 019399365 | -0. 090891857 | 0. 059675044 | 0. 07140604   | 0. 139331626 |
| 0. 100605357 | -0. 033549879 | 0. 487760383 | 0. 137778447  | 0. 004204712 |
| 0. 84818584  | 0. 046640248  | 0. 334613605 | -0. 213275867 | 8. 15E-06    |
| 0. 902505039 | 0. 040113636  | 0. 406693292 | 0. 107542836  | 0. 0257451   |
| 0. 764032289 | 0. 387186063  | 7. 90E-17    | -0. 176742318 | 0. 000230166 |
| 0. 223033868 | 0. 288775065  | 1. 05E-09    | -0. 243952942 | 3. 03E-07    |
| 0. 049172275 | 0. 098486957  | 0. 041222087 | 0. 33916826   | 4. 90E-13    |
| 0. 246170805 | 0. 196885748  | 3. 94E-05    | -0. 143545833 | 0. 00285037  |
| 2. 31E-12    | -0. 016966738 | 0. 72571522  | 0. 377802475  | 4. 89E-16    |
| 0. 549854131 | 0. 185089638  | 0. 000113232 | 0. 031586339  | 0. 513598543 |
| 9. 85E-12    | 0. 106644701  | 0. 027014796 | -0. 201007256 | 2. 68E-05    |
| 2. 31E-07    | -0. 097325009 | 0. 043686076 | 0. 117290334  | 0. 014953252 |
| 0. 044453572 | 0. 151920499  | 0. 001580519 | 0. 122144812  | 0. 011245558 |
| 2. 78E-10    | 0. 297577179  | 3. 06E-10    | -0. 169550936 | 0. 000413603 |
| 3. 57E-05    | 0. 412813754  | 4. 00E-19    | 0. 064690332  | 0. 180588485 |
| 0. 000599164 | 0. 244686222  | 2. 78E-07    | 0. 067484051  | 0. 162444102 |
| 0. 108333936 | 0. 124876712  | 0. 009538796 | -0. 231998564 | 1. 15E-06    |
| 1. 82E-05    | 0. 013587537  | 0. 778748775 | 0. 418385367  | 1. 19E-19    |
| 0. 002953616 | 0. 098422928  | 0. 041354743 | 0. 376323302  | 6. 49E-16    |
| 0. 297279084 | 0. 077290483  | 0. 109496778 | -0. 199676469 | 3. 04E-05    |
| 4. 40E-09    | -0. 041907415 | 0. 386017654 | 0. 098659412  | 0. 040866578 |
| 0. 447666464 | 0. 012180693  | 0. 801150572 | -0. 052627815 | 0. 276201671 |
| 0. 219208286 | 0. 238490375  | 5. 63E-07    | -0. 339146199 | 4. 92E-13    |
| 0. 087576854 | 0. 045185412  | 0. 349925044 | -0. 270957697 | 1. 13E-08    |
| 1. 49E-13    | 0. 336649623  | 7. 45E-13    | 0. 137037741  | 0. 004415481 |
| 5. 28E-05    | -0. 005528077 | 0. 909000113 | 0. 081296247  | 0. 09224439  |
| 0. 013178563 | -0. 025376755 | 0. 599738685 | 0. 32323566   | 6. 49E-12    |
| 0. 016371014 | -0. 222545073 | 3. 16E-06    | 0. 052368971  | 0. 278573831 |
| 0. 000805389 | 0. 229375273  | 1. 53E-06    | 0. 014668953  | 0. 761651511 |
| 0. 004589287 | -0. 251844065 | 1. 21E-07    | -0. 145869631 | 0. 002427408 |
| 0. 007281718 | -0. 010401837 | 0. 829708812 | 0. 31990054   | 1. 09E-11    |
| 1. 28E-07    | 0. 005984259  | 0. 901527377 | -0. 048182414 | 0. 318860387 |
| 0. 92977312  | 0. 013855394  | 0. 774503632 | -0. 382663412 | 1. 92E-16    |

|              |               |              |               |              |
|--------------|---------------|--------------|---------------|--------------|
| 0. 225761642 | 0. 007646062  | 0. 874383593 | -0. 042038898 | 0. 384527736 |
| 0. 922413818 | 0. 081216093  | 0. 0925669   | -0. 365555218 | 4. 84E-15    |
| 0. 006947524 | 0. 099933487  | 0. 038319506 | -0. 240744487 | 4. 37E-07    |
| 0. 855473082 | -0. 102140345 | 0. 034225705 | 0. 246415325  | 2. 28E-07    |
| 0. 207692786 | -0. 200700647 | 2. 76E-05    | 0. 078819242  | 0. 102634606 |
| 0. 78495088  | 0. 228240937  | 1. 73E-06    | 0. 107397805  | 0. 025946581 |
| 0. 033324098 | 0. 205472199  | 1. 75E-05    | 0. 024175387  | 0. 617127665 |
| 0. 000976127 | 0. 145983056  | 0. 002408309 | 0. 159058651  | 0. 000933612 |
| 0. 000145705 | 0. 269725406  | 1. 33E-08    | 0. 090897852  | 0. 059658148 |
| 0. 000940739 | 0. 054652599  | 0. 258119552 | -0. 307249731 | 7. 47E-11    |
| 2. 80E-05    | 0. 153472258  | 0. 001412249 | -0. 348200732 | 1. 06E-13    |
| 7. 29E-13    | -0. 009696837 | 0. 84109167  | 0. 061956205  | 0. 199757209 |
| 0. 000355865 | -0. 004715967 | 0. 922322772 | -0. 065718852 | 0. 173741607 |
| 0. 045661731 | -0. 033185218 | 0. 492505483 | -0. 090320868 | 0. 061302424 |
| 5. 50E-06    | 0. 116512069  | 0. 015638238 | 0. 39109952   | 3. 63E-17    |
| 0. 860826997 | 0. 017438456  | 0. 718408706 | -0. 12765126  | 0. 008044947 |
| 0. 435853389 | 0. 065263326  | 0. 176749819 | -0. 324345962 | 5. 45E-12    |
| 0. 977075695 | 0. 07001931   | 0. 147196777 | -0. 261292462 | 3. 83E-08    |
| 0. 1750549   | 0. 264199119  | 2. 67E-08    | 0. 087291208  | 0. 070560901 |
| 0. 180531992 | 0. 401674085  | 4. 21E-18    | -0. 087532111 | 0. 069785139 |
| 0. 005162138 | 0. 22553026   | 2. 31E-06    | -0. 148318271 | 0. 002044347 |
| 3. 68E-18    | 0. 0948522    | 0. 049344219 | -0. 206044216 | 1. 66E-05    |
| 0. 889315861 | -0. 146815146 | 0. 00227234  | 0. 126957565  | 0. 008397438 |
| 0. 134821347 | -0. 032658965 | 0. 499396522 | 0. 365787243  | 4. 64E-15    |
| 0. 000489847 | 0. 036086844  | 0. 455439343 | -0. 209682222 | 1. 16E-05    |
| 7. 23E-05    | -0. 019958514 | 0. 679822791 | 0. 117802124  | 0. 014517289 |
| 3. 33E-10    | -0. 015479715 | 0. 748908445 | 0. 220049544  | 4. 10E-06    |
| 1. 04E-20    | -0. 023593244 | 0. 62563221  | 0. 15634734   | 0. 001143241 |
| 8. 71E-12    | 0. 213461826  | 8. 00E-06    | 0. 152597686  | 0. 001504943 |
| 0. 039242373 | 0. 203184415  | 2. 18E-05    | -0. 206542053 | 1. 58E-05    |
| 1. 61E-18    | -0. 06589412  | 0. 172594377 | -0. 194227297 | 5. 02E-05    |
| 0. 124323928 | 0. 025856831  | 0. 59285226  | -0. 260479035 | 4. 24E-08    |
| 0. 007990945 | 0. 134770477  | 0. 005121247 | 0. 438551178  | 1. 23E-21    |
| 0. 00026189  | 0. 243769787  | 3. 09E-07    | -0. 029706933 | 0. 538978431 |
| 0. 531647042 | 0. 096005022  | 0. 046634427 | 0. 016768374  | 0. 728795204 |
| 0. 93513143  | 0. 093827659  | 0. 051861786 | -0. 148956668 | 0. 001954004 |
| 0. 000977319 | 0. 3251201    | 4. 82E-12    | 0. 058101932  | 0. 229233326 |
| 1. 13E-05    | 0. 303636782  | 1. 27E-10    | 0. 085763862  | 0. 075644785 |
| 0. 210454551 | 0. 11146238   | 0. 020787984 | -0. 069092607 | 0. 152638406 |
| 5. 51E-08    | 0. 394372087  | 1. 88E-17    | 0. 144847222  | 0. 002605899 |
| 0. 028138869 | 0. 097606267  | 0. 043078555 | 0. 088996842  | 0. 065217268 |
| 0. 04486096  | -0. 196895533 | 3. 93E-05    | 0. 216026799  | 6. 18E-06    |
| 0. 263777262 | -0. 022724669 | 0. 638413763 | -0. 161611572 | 0. 000769243 |
| 0. 075990407 | -0. 320719101 | 9. 63E-12    | 0. 053427356  | 0. 268961188 |
| 0. 088677025 | -0. 01261593  | 0. 794201743 | -0. 093060094 | 0. 053817295 |
| 5. 73E-05    | 0. 112593497  | 0. 01952134  | -0. 064620103 | 0. 181063176 |
| 0. 002727852 | 0. 035001123  | 0. 469122304 | -0. 294671451 | 4. 62E-10    |
| 0. 397842155 | -0. 0077656   | 0. 872436344 | 0. 312437415  | 3. 44E-11    |
| 0. 81695007  | 0. 026651961  | 0. 581526735 | 0. 348336663  | 1. 03E-13    |
| 0. 009359121 | -0. 118626698 | 0. 013838358 | -0. 075206052 | 0. 119429591 |
| 4. 78E-06    | 0. 061933434  | 0. 199922848 | -0. 145208376 | 0. 002541527 |



|             |              |             |              |             |
|-------------|--------------|-------------|--------------|-------------|
| 0.799913368 | 0.116315717  | 0.015815344 | 0.217859042  | 5.13E-06    |
| 2.70E-11    | 0.1052643    | 0.029071189 | 0.438882891  | 1.13E-21    |
| 0.004543201 | -0.183804948 | 0.000126553 | 0.225000157  | 2.44E-06    |
| 2.17E-05    | 0.136726889  | 0.004506741 | 0.061291385  | 0.20463429  |
| 0.000262864 | 0.019928258  | 0.680281381 | -0.400628504 | 5.23E-18    |
| 0.084608554 | 0.384312891  | 1.39E-16    | 0.001601638  | 0.973582387 |
| 0.214472249 | 0.102120318  | 0.03426111  | -0.197313854 | 3.78E-05    |
| 0.006448684 | -0.084315595 | 0.080736789 | -0.112927633 | 0.019160262 |
| 7.71E-16    | 0.09625183   | 0.046070804 | -0.345722969 | 1.62E-13    |
| 1.48E-07    | 0.178450013  | 0.000199583 | 0.13767173   | 0.004234507 |
| 0.187907386 | -0.011902235 | 0.805604597 | -0.22092429  | 3.74E-06    |
| 0.141090065 | -0.016562399 | 0.731997982 | -0.295155354 | 4.31E-10    |
| 3.66E-07    | 0.123758979  | 0.010207116 | -0.180143332 | 0.000173048 |
| 0.11503112  | -0.107925988 | 0.025219289 | 0.238995127  | 5.32E-07    |
| 0.607922703 | 0.141687116  | 0.003235795 | 0.016955796  | 0.725885005 |
| 7.70E-13    | -0.153018596 | 0.001459656 | -0.02242101  | 0.642907919 |
| 4.37E-09    | 0.264090591  | 2.71E-08    | -0.066009066 | 0.171845063 |
| 0.008836931 | -0.227704819 | 1.83E-06    | 0.169309389  | 0.000421658 |
| 4.71E-15    | -0.342860571 | 2.64E-13    | -0.232003852 | 1.15E-06    |
| 0.003651854 | 0.331845213  | 1.64E-12    | -0.132412426 | 0.005961564 |
| 0.475433186 | 0.017900006  | 0.711284425 | 0.35467106   | 3.43E-14    |
| 1.37E-08    | 0.285255794  | 1.71E-09    | 0.114758136  | 0.017283618 |
| 0.524732869 | 0.13979854   | 0.003675316 | -0.211903251 | 9.35E-06    |
| 9.47E-05    | 0.113330998  | 0.018732135 | 0.094079135  | 0.051234132 |
| 0.031114435 | -0.001679446 | 0.972299523 | -0.333895595 | 1.17E-12    |
| 2.39E-05    | 0.42690426   | 1.79E-20    | 0.081825702  | 0.090136608 |
| 0.155027752 | 0.040210738  | 0.405557483 | -0.345634515 | 1.64E-13    |
| 0.240403271 | 0.109987653  | 0.0225462   | 0.203359414  | 2.15E-05    |
| 0.610162111 | 0.087547207  | 0.069736762 | 0.293009151  | 5.84E-10    |
| 1.25E-05    | 0.01185521   | 0.806357416 | 0.345827061  | 1.59E-13    |
| 0.783022855 | 0.138065088  | 0.004125619 | 0.310351226  | 4.70E-11    |
| 0.645548261 | 0.219101973  | 4.52E-06    | -0.10571914  | 0.028379257 |
| 0.000740544 | 0.088118555  | 0.0679258   | 0.126638442  | 0.00856417  |
| 2.89E-07    | 0.008718128  | 0.856948346 | 0.222797027  | 3.08E-06    |
| 2.83E-14    | -0.031237312 | 0.51826456  | 0.03890686   | 0.420966208 |
| 3.06E-05    | 0.081253815  | 0.092415007 | 0.238548606  | 5.60E-07    |
| 0.0021229   | -0.019622789 | 0.684917897 | -0.3385828   | 5.40E-13    |
| 3.26E-12    | 0.03526782   | 0.465740372 | -0.088978973 | 0.065271473 |
| 0.084355925 | 0.062800278  | 0.19368776  | 0.096839281  | 0.044752233 |
| 6.44E-06    | 0.062774881  | 0.193868388 | 0.08125232   | 0.092421024 |
| 0.070626566 | 0.079278563  | 0.100640824 | -0.093766976 | 0.052014197 |
| 1.85E-06    | -0.018555973 | 0.701202425 | 0.404889314  | 2.15E-18    |
| 1.03E-05    | -0.006596996 | 0.891503891 | 0.213680903  | 7.83E-06    |
| 1.87E-09    | -0.037881779 | 0.433317139 | 0.044060715  | 0.362060651 |
| 0.004491537 | 0.220762262  | 3.81E-06    | 0.225999351  | 2.20E-06    |
| 0.434754969 | -0.01354361  | 0.779445582 | -0.223561228 | 2.84E-06    |
| 0.067599898 | 0.027356684  | 0.571574011 | -0.341180288 | 3.50E-13    |
| 0.572867666 | -0.154960905 | 0.001266447 | -0.07725577  | 0.109656693 |
| 5.27E-20    | 0.032527173  | 0.501130242 | 0.298651671  | 2.62E-10    |
| 0.004425516 | -0.265457303 | 2.28E-08    | 0.034792065  | 0.471782768 |
| 0.139252185 | 0.091649942  | 0.057569758 | -0.303277246 | 1.34E-10    |

|             |              |             |              |             |
|-------------|--------------|-------------|--------------|-------------|
| 0.024750534 | 0.019483065  | 0.687042636 | -0.122481939 | 0.011021259 |
| 0.170374859 | 0.234082871  | 9.19E-07    | 0.076739566  | 0.112056479 |
| 0.960774761 | 0.07537181   | 0.118614824 | 0.316264661  | 1.92E-11    |
| 0.118485821 | 0.064024479  | 0.185126335 | -0.287662841 | 1.23E-09    |
| 0.099890342 | -0.024159166 | 0.617363959 | 0.2615848    | 3.70E-08    |
| 1.55E-09    | 0.028879374  | 0.550349272 | 0.161378837  | 0.000783037 |
| 0.342062305 | 0.363165151  | 7.49E-15    | 0.022910519  | 0.635669687 |
| 8.62E-12    | -0.004497302 | 0.925913858 | -0.134709579 | 0.005141532 |
| 0.080690441 | 0.040099986  | 0.406853104 | -0.278981216 | 3.97E-09    |
| 0.523291571 | 0.182185181  | 0.000145449 | 0.07152004   | 0.138699674 |
| 2.45E-15    | 0.020147942  | 0.676954364 | 0.354972885  | 3.25E-14    |
| 0.08067109  | -0.228227229 | 1.73E-06    | 0.03429804   | 0.478102503 |
| 6.80E-05    | 0.173470043  | 0.000301373 | -0.387487436 | 7.44E-17    |
| 0.074491966 | -0.124360409 | 0.009842516 | 0.300928063  | 1.89E-10    |
| 0.950031736 | 0.216804174  | 5.71E-06    | -0.105956477 | 0.028023852 |
| 0.005805369 | 0.150442874  | 0.001757656 | 0.365084499  | 5.28E-15    |
| 0.188321992 | 0.003829269  | 0.936893771 | 0.293645671  | 5.34E-10    |
| 0.339043788 | 0.034101994  | 0.48062311  | -0.354352136 | 3.63E-14    |
| 2.63E-14    | 0.013803216  | 0.775330053 | 0.399295318  | 6.88E-18    |
| 0.005926234 | 0.258681787  | 5.29E-08    | 0.104166438  | 0.030801188 |
| 0.215143539 | 0.124377124  | 0.00983255  | -0.089681377 | 0.063168342 |
| 1.98E-06    | -0.083731459 | 0.082867537 | 0.150813173  | 0.001711633 |
| 0.005838196 | 0.012256625  | 0.799937125 | -0.150579078 | 0.001740598 |
| 0.890213671 | 0.119030181  | 0.01351644  | -0.081200287 | 0.092630602 |
| 6.07E-08    | 0.272084158  | 9.80E-09    | -0.118845968 | 0.013662587 |
| 0.568066099 | -0.016898796 | 0.726769652 | 0.174351917  | 0.000280388 |
| 4.93E-06    | 0.148513768  | 0.002016283 | -0.119620743 | 0.013057151 |
| 4.79E-15    | 0.014811977  | 0.759398749 | 0.157764991  | 0.001028759 |
| 1.38E-05    | 0.297235117  | 3.21E-10    | -0.105253832 | 0.029087282 |
| 0.184864436 | 0.066694333  | 0.167428179 | 0.075707912  | 0.116976078 |
| 0.006579962 | 0.384215545  | 1.42E-16    | -0.159001612 | 0.00093763  |
| 0.0030624   | 0.244913101  | 2.71E-07    | -0.10048579  | 0.037257888 |
| 0.007103837 | 0.13036155   | 0.006790937 | -0.259714192 | 4.66E-08    |
| 0.10186108  | -0.06216566  | 0.198238329 | 0.082117608  | 0.088991138 |
| 6.78E-10    | -0.005923522 | 0.902521818 | 0.258003094  | 5.74E-08    |
| 0.996334855 | 0.030003263  | 0.534935508 | -0.369583712 | 2.30E-15    |
| 0.266285077 | 0.345040456  | 1.82E-13    | 0.081216612  | 0.09256481  |
| 0.563547221 | 0.307576817  | 7.12E-11    | 0.21672901   | 5.76E-06    |
| 3.89E-07    | 0.296309295  | 3.66E-10    | -0.068669714 | 0.155171764 |
| 2.23E-11    | 0.108625558  | 0.024283118 | 0.04194978   | 0.385537202 |
| 0.519585857 | 0.23035675   | 1.38E-06    | -0.090494922 | 0.060802515 |
| 0.683590826 | 0.044300751  | 0.35944882  | -0.233613152 | 9.67E-07    |
| 0.12187699  | 0.024127442  | 0.617826195 | 0.271539623  | 1.05E-08    |
| 0.651568997 | 0.030113958  | 0.533429192 | -0.245125319 | 2.65E-07    |
| 0.633195899 | 0.028366822  | 0.557450378 | -0.334866694 | 9.99E-13    |
| 0.000534387 | 0.261581648  | 3.70E-08    | -0.249505111 | 1.59E-07    |
| 2.24E-10    | 0.046066523  | 0.340599637 | 0.486269957  | 6.64E-27    |
| 0.188894087 | 0.190409442  | 7.09E-05    | -0.117647296 | 0.014647984 |
| 0.475225062 | 0.059518987  | 0.218056861 | 0.175446682  | 0.000256235 |
| 0.001774165 | -0.032535096 | 0.50102592  | -0.12457104  | 0.009717588 |
| 0.035895489 | 0.155957958  | 0.001176679 | 0.280441697  | 3.27E-09    |

|              |               |              |               |              |
|--------------|---------------|--------------|---------------|--------------|
| 5. 16E-10    | 0. 161186873  | 0. 000794585 | -0. 016933978 | 0. 726223578 |
| 6. 46E-07    | -0. 032820662 | 0. 49727377  | 0. 143419936  | 0. 002875094 |
| 0. 003027888 | 0. 176788159  | 0. 00022929  | 0. 435449542  | 2. 53E-21    |
| 3. 05E-22    | 0. 108209223  | 0. 024836576 | -0. 246179023 | 2. 34E-07    |
| 0. 041978921 | 0. 372491353  | 1. 34E-15    | -0. 06824259  | 0. 157762629 |
| 0. 00034742  | -0. 296469191 | 3. 58E-10    | 0. 186183546  | 0. 00010294  |
| 0. 254972966 | -0. 146520525 | 0. 00231966  | 0. 172081094  | 0. 000337416 |
| 0. 011104289 | -0. 235635776 | 7. 74E-07    | 0. 199182452  | 3. 18E-05    |
| 0. 394574894 | 0. 259062731  | 5. 05E-08    | -0. 126786113 | 0. 008486653 |
| 1. 37E-17    | 0. 046596483  | 0. 335067834 | 0. 290200468  | 8. 64E-10    |
| 0. 005381278 | 0. 27196315   | 9. 95E-09    | -0. 044115181 | 0. 361466975 |
| 0. 011584441 | 0. 339113134  | 4. 95E-13    | 0. 077243983  | 0. 109711031 |
| 9. 42E-07    | 0. 0348208    | 0. 471416593 | -0. 396081557 | 1. 33E-17    |
| 0. 687350145 | -0. 041922738 | 0. 385843836 | -0. 219823837 | 4. 19E-06    |
| 0. 754784031 | 0. 214845805  | 6. 96E-06    | 0. 287145215  | 1. 32E-09    |
| 5. 34E-05    | 0. 048493828  | 0. 31573899  | -0. 251513995 | 1. 25E-07    |
| 0. 000314173 | 0. 33788012   | 6. 07E-13    | -0. 077436236 | 0. 108827334 |
| 0. 596388735 | 0. 14939669   | 0. 001893876 | -0. 318413806 | 1. 38E-11    |
| 0. 026921328 | -0. 182878749 | 0. 000137055 | 0. 101591446  | 0. 03520746  |
| 0. 226673041 | 0. 05057156   | 0. 295426595 | -0. 362703677 | 8. 15E-15    |
| 0. 26367435  | 0. 143305696  | 0. 002897698 | -0. 228744713 | 1. 64E-06    |
| 7. 16E-05    | -0. 30673424  | 8. 06E-11    | -0. 240503798 | 4. 49E-07    |
| 0. 406090414 | -0. 010239087 | 0. 832333498 | 0. 077534786  | 0. 108376527 |
| 0. 117767379 | 0. 092361216  | 0. 055650792 | -0. 30827279  | 6. 42E-11    |
| 0. 486976814 | 0. 097356335  | 0. 043618057 | 0. 101392834  | 0. 035568551 |
| 0. 063453652 | 0. 211136292  | 1. 01E-05    | 0. 04221405   | 0. 382548411 |
| 0. 006677741 | 0. 038907546  | 0. 420958013 | -0. 375385749 | 7. 75E-16    |
| 1. 90E-05    | 0. 027704941  | 0. 566685614 | 0. 032971591  | 0. 495296692 |
| 0. 395452048 | 0. 005643514  | 0. 907108353 | 0. 207235665  | 1. 48E-05    |
| 0. 234567544 | 0. 067806445  | 0. 160441776 | -0. 141512501 | 0. 003274332 |
| 2. 34E-11    | 0. 203377707  | 2. 14E-05    | 0. 144042372  | 0. 002754732 |
| 7. 30E-10    | -0. 048686418 | 0. 313818645 | 0. 343494461  | 2. 37E-13    |
| 0. 026401885 | 0. 119405494  | 0. 013222935 | 0. 430131753  | 8. 59E-21    |
| 0. 606267902 | 0. 155737698  | 0. 00119599  | 0. 435599327  | 2. 44E-21    |
| 0. 022745214 | -0. 047919727 | 0. 321508986 | 0. 306288496  | 8. 61E-11    |
| 0. 010880186 | 0. 170519848  | 0. 00038271  | 0. 173971509  | 0. 000289267 |
| 0. 001085573 | 0. 062385758  | 0. 196651362 | 0. 174952463  | 0. 000266888 |
| 0. 000355591 | 0. 140922669  | 0. 003407606 | -0. 021038505 | 0. 663531962 |
| 9. 06E-05    | 0. 113419978  | 0. 018638822 | 0. 498649228  | 2. 07E-28    |
| 0. 961831931 | 0. 042671804  | 0. 377405    | -0. 381068942 | 2. 61E-16    |
| 2. 87E-11    | -0. 118715652 | 0. 013766812 | -0. 135343624 | 0. 004933839 |
| 0. 089582825 | 0. 207094785  | 1. 50E-05    | 0. 256852951  | 6. 60E-08    |
| 0. 29589873  | 0. 022292371  | 0. 644815719 | 0. 134042593  | 0. 005368483 |
| 0. 235564412 | 0. 008697259  | 0. 857287108 | -0. 164222002 | 0. 000629198 |
| 0. 01710055  | 0. 136664008  | 0. 004525408 | -0. 142892577 | 0. 002980793 |
| 0. 137551779 | 0. 072620555  | 0. 132711673 | 0. 478196885  | 5. 92E-26    |
| 0. 046387379 | -0. 006202115 | 0. 897961689 | -0. 225080184 | 2. 42E-06    |
| 3. 44E-06    | -0. 057900325 | 0. 230855846 | -0. 028842921 | 0. 550852837 |
| 0. 013503075 | 0. 394662245  | 1. 77E-17    | 0. 135428907  | 0. 004906487 |
| 0. 078031315 | 0. 337877948  | 6. 08E-13    | -0. 153281371 | 0. 001432021 |
| 4. 27E-23    | 0. 102224734  | 0. 034076855 | -0. 039927391 | 0. 408877097 |

|             |              |             |              |             |
|-------------|--------------|-------------|--------------|-------------|
| 0.000339159 | 0.042274367  | 0.381868241 | -0.415195409 | 2.39E-19    |
| 2.00E-15    | 0.002135461  | 0.964782436 | -0.297172669 | 3.24E-10    |
| 4.54E-25    | -0.047970017 | 0.321000823 | 0.187664363  | 9.04E-05    |
| 0.004260123 | 0.005657104  | 0.906885672 | -0.187901682 | 8.85E-05    |
| 0.124503564 | 0.029035681  | 0.548192597 | -0.255330353 | 7.94E-08    |
| 0.007100136 | -0.274354311 | 7.30E-09    | -0.029225341 | 0.545581314 |
| 0.117875772 | 0.308352396  | 6.34E-11    | 0.15895903   | 0.00094064  |
| 7.41E-07    | 0.066546159  | 0.168375961 | 0.259092419  | 5.03E-08    |
| 1.67E-08    | 0.29815506   | 2.81E-10    | -0.015134195 | 0.754330988 |
| 0.967474494 | 0.208832759  | 1.26E-05    | -0.119072118 | 0.013483362 |
| 0.363176137 | 0.039194483  | 0.417538074 | 0.279093709  | 3.91E-09    |
| 0.203614434 | 0.020579797  | 0.670432427 | -0.20104819  | 2.67E-05    |
| 0.000159779 | -0.063487007 | 0.188850138 | 0.140488347  | 0.003508869 |
| 0.002791897 | 0.097486693  | 0.043335962 | -0.316357353 | 1.89E-11    |
| 0.714392796 | 0.379100001  | 3.82E-16    | -0.013431674 | 0.781222005 |
| 0.642587359 | -0.041716028 | 0.388192666 | 0.109638736  | 0.022980555 |
| 0.001576783 | 0.059493222  | 0.218256529 | 0.034114147  | 0.480466649 |
| 0.007089955 | 0.04998628   | 0.30105813  | -0.274080254 | 7.56E-09    |
| 0.091026632 | -0.00216604  | 0.96427846  | -0.334949835 | 9.86E-13    |
| 0.443023974 | 0.046227908  | 0.338908939 | -0.383701617 | 1.57E-16    |
| 0.423084194 | 0.159514612  | 0.000902061 | -0.314452769 | 2.53E-11    |
| 9.70E-06    | 0.048197249  | 0.318711237 | 0.237925896  | 6.00E-07    |
| 3.59E-13    | 0.211897845  | 9.35E-06    | 0.011725473  | 0.808435246 |
| 4.34E-08    | -0.207665839 | 1.42E-05    | -0.076571645 | 0.112845966 |
| 0.154446263 | -0.312562367 | 3.37E-11    | -0.071767046 | 0.137337964 |
| 0.111070291 | -0.05292953  | 0.273453994 | 0.168907038  | 0.0004354   |
| 0.465480085 | -0.015910367 | 0.742167134 | 0.405565485  | 1.87E-18    |
| 0.093184463 | 0.087555314  | 0.069710792 | -0.246116285 | 2.36E-07    |
| 0.145543715 | -0.21766869  | 5.23E-06    | 0.057614491  | 0.233170146 |
| 0.000316611 | 0.084594985  | 0.07973345  | -0.378362757 | 4.39E-16    |
| 1.18E-06    | -0.122738643 | 0.010853132 | -0.106005937 | 0.027950271 |
| 0.001352671 | 0.045064493  | 0.351217289 | 0.067583053  | 0.161827232 |
| 0.003686863 | 0.024202801  | 0.616728429 | 0.398130842  | 8.74E-18    |
| 2.76E-09    | -0.116286061 | 0.015842245 | -0.078837954 | 0.102552772 |
| 0.022145684 | -0.000464706 | 0.9923338   | 0.271403913  | 1.07E-08    |
| 0.02051602  | 0.199281489  | 3.15E-05    | -0.234822842 | 8.47E-07    |
| 0.091943521 | 0.057945308  | 0.230493126 | 0.30426899   | 1.16E-10    |
| 0.310043817 | -0.285040047 | 1.76E-09    | -0.087083294 | 0.071236082 |
| 0.059088558 | -0.150432708 | 0.001758935 | 0.016624486  | 0.731032079 |
| 5.31E-07    | 0.173710449  | 0.000295511 | -0.370853578 | 1.82E-15    |
| 6.82E-13    | 0.031224762  | 0.518432747 | 0.059658788  | 0.216975763 |
| 9.17E-10    | 0.007818169  | 0.871580252 | -0.438179033 | 1.34E-21    |
| 0.072672992 | 0.254596452  | 8.67E-08    | 0.076434058  | 0.11349609  |
| 0.754911529 | 0.030326114  | 0.53054818  | -0.084144141 | 0.081357552 |
| 0.003077574 | 0.027279737  | 0.572656798 | 0.475468224  | 1.22E-25    |
| 0.659878442 | 0.300258933  | 2.08E-10    | 0.157402003  | 0.001057019 |
| 0.103351553 | 0.097034841  | 0.044320382 | -0.230800959 | 1.31E-06    |
| 0.376975652 | 0.025873567  | 0.59261284  | 0.363525408  | 7.02E-15    |
| 1.67E-08    | 0.015220328  | 0.752978091 | 0.06448368   | 0.18198794  |
| 0.272590076 | 0.048751924  | 0.313167221 | 0.040193491  | 0.405759087 |
| 0.67339472  | 0.119918131  | 0.012831118 | 0.042629987  | 0.377873096 |

|              |               |              |               |              |
|--------------|---------------|--------------|---------------|--------------|
| 9. 40E-11    | -0. 102882521 | 0. 032935401 | 0. 050548161  | 0. 295650381 |
| 1. 70E-07    | -0. 012965342 | 0. 788634882 | 0. 375842639  | 7. 11E-16    |
| 0. 022385163 | 0. 025883922  | 0. 592464736 | 0. 087430258  | 0. 070112272 |
| 0. 259231534 | 0. 036726423  | 0. 447484884 | -0. 333944094 | 1. 16E-12    |
| 0. 037609437 | 0. 364722046  | 5. 64E-15    | -0. 063053552 | 0. 191893137 |
| 0. 307914601 | 0. 233653582  | 9. 63E-07    | -0. 118388672 | 0. 014031414 |
| 6. 63E-09    | 0. 342177029  | 2. 96E-13    | -0. 128544532 | 0. 007610515 |
| 0. 068571342 | 0. 029475004  | 0. 54215332  | -0. 06512866  | 0. 177646498 |
| 0. 17592603  | 0. 04742873   | 0. 32649783  | -0. 06711175  | 0. 164779692 |
| 0. 10470082  | 0. 13390376   | 0. 005416841 | 0. 331701624  | 1. 68E-12    |
| 0. 234025648 | 0. 025919298  | 0. 591958865 | 0. 221794234  | 3. 42E-06    |
| 0. 766055545 | 0. 024243537  | 0. 616135368 | -0. 300652192 | 1. 96E-10    |
| 0. 226697069 | 0. 188333572  | 8. 52E-05    | -0. 103895384 | 0. 031241623 |
| 0. 35223222  | 0. 199954453  | 2. 96E-05    | -0. 211216924 | 1. 00E-05    |
| 0. 00012483  | 0. 161469904  | 0. 000777613 | 0. 341548599  | 3. 29E-13    |
| 0. 908931226 | 0. 061651979  | 0. 201978393 | -0. 224318865 | 2. 63E-06    |
| 0. 170835446 | -0. 10537338  | 0. 028903944 | 0. 308258817  | 6. 43E-11    |
| 0. 000111823 | 0. 264552703  | 2. 56E-08    | 0. 01739131   | 0. 71913782  |
| 0. 695170473 | -0. 293831471 | 5. 20E-10    | -0. 013193286 | 0. 785009028 |
| 0. 177418995 | -0. 158214897 | 0. 000994699 | 0. 041184447  | 0. 394272692 |
| 0. 440200763 | -0. 127246034 | 0. 008249217 | -0. 099693935 | 0. 038787871 |
| 0. 03726032  | 0. 024348594  | 0. 614607056 | -0. 354464894 | 3. 55E-14    |
| 4. 01E-10    | -0. 087126927 | 0. 071093951 | -0. 211523683 | 9. 71E-06    |
| 0. 075087305 | 0. 170205984  | 0. 000392474 | -0. 227148612 | 1. 95E-06    |
| 0. 643946343 | -0. 201488199 | 2. 56E-05    | -0. 090026128 | 0. 062156693 |
| 1. 15E-05    | 0. 059388436  | 0. 219069906 | 0. 246035519  | 2. 38E-07    |
| 0. 010641758 | 0. 152153413  | 0. 001554141 | -0. 062849994 | 0. 193334517 |
| 0. 191720922 | -0. 187321225 | 9. 32E-05    | 0. 010408832  | 0. 829596046 |
| 0. 005716882 | 0. 052208587  | 0. 280050569 | 0. 204154739  | 1. 99E-05    |
| 0. 068228991 | 0. 131416794  | 0. 006352108 | -0. 031107901 | 0. 520000147 |
| 0. 083497469 | -0. 050045528 | 0. 300484827 | 0. 313851649  | 2. 77E-11    |
| 0. 139077491 | -0. 009622698 | 0. 842290682 | -0. 101766492 | 0. 034891807 |
| 9. 07E-23    | -0. 033335217 | 0. 490550666 | 0. 343085907  | 2. 54E-13    |
| 0. 608506128 | 0. 014695004  | 0. 761241038 | -0. 31365442  | 2. 86E-11    |
| 5. 80E-09    | 0. 065917525  | 0. 172441604 | 0. 02087855   | 0. 665935019 |
| 0. 06268089  | 0. 001669174  | 0. 972468879 | -0. 264619594 | 2. 53E-08    |
| 8. 62E-20    | 0. 055854746  | 0. 247779495 | -0. 005778815 | 0. 90489172  |
| 0. 61011322  | 0. 162644049  | 0. 000710721 | 0. 35739832   | 2. 11E-14    |
| 0. 001226814 | -0. 07950746  | 0. 099658799 | 0. 015805047  | 0. 743813984 |
| 0. 029043668 | 0. 060962323  | 0. 207079952 | -0. 151728728 | 0. 001602545 |
| 6. 66E-15    | 0. 174694758  | 0. 000272605 | -0. 013424209 | 0. 781340515 |
| 0. 000120063 | 0. 28273883   | 2. 40E-09    | 0. 047861535  | 0. 322097643 |
| 0. 007942075 | 0. 156364083  | 0. 001141823 | 0. 34060818   | 3. 85E-13    |
| 0. 006331479 | -0. 026419928 | 0. 584821303 | -0. 239226638 | 5. 19E-07    |
| 5. 53E-09    | -0. 001434482 | 0. 976338632 | 0. 240401598  | 4. 54E-07    |
| 0. 149630922 | 0. 079928258  | 0. 097873355 | -0. 344182014 | 2. 11E-13    |
| 0. 003825609 | -0. 010525319 | 0. 827718682 | 0. 274826898  | 6. 86E-09    |
| 0. 003282305 | 0. 494871498  | 6. 05E-28    | 0. 091188871  | 0. 058842742 |
| 0. 00594004  | 0. 107269284  | 0. 02612626  | 0. 203848021  | 2. 05E-05    |
| 0. 054071882 | 0. 173902714  | 0. 0002909   | 0. 315047752  | 2. 31E-11    |
| 0. 620176619 | 0. 004514985  | 0. 92562339  | 0. 257511594  | 6. 10E-08    |

|             |              |             |              |             |
|-------------|--------------|-------------|--------------|-------------|
| 0.4949224   | 0.245871667  | 2.43E-07    | 0.304585156  | 1.11E-10    |
| 7.50E-09    | 0.186561582  | 9.96E-05    | 0.075470737  | 0.118130629 |
| 0.320833511 | -0.000709843 | 0.988290054 | -0.037060679 | 0.443359262 |
| 0.050680583 | 0.083556275  | 0.083515334 | -0.24206819  | 3.76E-07    |
| 0.195440486 | 0.069495852  | 0.15025208  | -0.405829004 | 1.77E-18    |
| 0.000532451 | 0.11285684   | 0.019236273 | 0.315424782  | 2.18E-11    |
| 0.550500508 | 0.033478945  | 0.48868148  | -0.366007964 | 4.46E-15    |
| 3.22E-05    | 0.2650687    | 2.40E-08    | 0.135247949  | 0.004964686 |
| 0.844112475 | -0.045975596 | 0.341554576 | -0.032933542 | 0.495794717 |
| 0.234377715 | 0.13645958   | 0.004586577 | -0.036141396 | 0.454757799 |
| 0.088878955 | -0.102730142 | 0.033196879 | 0.23102888   | 1.28E-06    |
| 0.616538684 | -0.008397919 | 0.862149094 | 0.195395087  | 4.52E-05    |
| 0.015362452 | 0.037791784  | 0.434411346 | -0.40908371  | 8.88E-19    |
| 0.063579704 | -0.237970287 | 5.97E-07    | 0.044816819  | 0.353873553 |
| 0.047312655 | 0.072017346  | 0.135968592 | -0.346847882 | 1.34E-13    |
| 4.77E-05    | -0.204235292 | 1.97E-05    | 0.047752403  | 0.323203504 |
| 0.006621763 | 0.175468872  | 0.000255767 | -0.239762477 | 4.88E-07    |
| 0.008481416 | 0.114591875  | 0.017447173 | -0.113801107 | 0.018243709 |
| 0.000410662 | 0.021741608  | 0.653010153 | 0.269862383  | 1.30E-08    |
| 1.02E-05    | -0.255940617 | 7.38E-08    | 0.043616241  | 0.366928154 |
| 0.00013451  | 0.019084846  | 0.693111727 | 0.104583795  | 0.030133412 |
| 0.533559512 | -0.087225247 | 0.070774535 | 0.099054748  | 0.040061368 |
| 0.344966494 | -0.152143041 | 0.001555307 | 0.242301597  | 3.66E-07    |
| 6.66E-09    | 0.169804935  | 0.000405287 | -0.110519738 | 0.021897517 |
| 0.002846937 | 0.050709694  | 0.294107792 | 0.158798419  | 0.000952073 |
| 0.00607103  | 0.117373925  | 0.01488127  | 0.061553987  | 0.202697645 |
| 0.734587434 | -0.20636916  | 1.61E-05    | -0.051390902 | 0.28766174  |
| 0.017420141 | 0.071705382  | 0.137676943 | -0.149983126 | 0.001816373 |
| 2.20E-07    | -0.112379264 | 0.019755951 | 0.06188036   | 0.200309294 |
| 0.000859779 | 0.114037412  | 0.01800242  | 0.08195513   | 0.08962727  |
| 0.088413073 | 0.033448889  | 0.489072033 | -0.342443353 | 2.83E-13    |
| 0.010315132 | -0.075367554 | 0.118635686 | 0.234884602  | 8.41E-07    |
| 0.09956336  | 0.096356845  | 0.045832725 | -0.116950078 | 0.015249418 |
| 0.002234529 | 0.409298053  | 8.48E-19    | -0.056093983 | 0.245756693 |
| 0.290889924 | -0.011067383 | 0.818995521 | -0.301259683 | 1.80E-10    |
| 0.034012133 | 0.032168305  | 0.505867164 | -0.192838957 | 5.70E-05    |
| 7.05E-12    | 0.252287369  | 1.14E-07    | 0.021574877  | 0.655499144 |
| 0.000359326 | 0.001021155  | 0.983155129 | -0.419208819 | 9.93E-20    |
| 0.063165512 | 0.295268258  | 4.24E-10    | -0.098872315 | 0.040431259 |
| 0.1300869   | -0.173228169 | 0.000307379 | 0.049033081  | 0.31038134  |
| 0.000514972 | 0.215411522  | 6.58E-06    | -0.035594749 | 0.461613123 |
| 0.043216437 | -0.35383711  | 3.97E-14    | -0.125902398 | 0.008960025 |
| 0.436910215 | -0.345656166 | 1.64E-13    | -0.112199726 | 0.019954453 |
| 0.133587867 | 0.241262921  | 4.12E-07    | 0.101900733  | 0.034651368 |
| 0.811246738 | -0.21791457  | 5.10E-06    | 0.153989078  | 0.001359968 |
| 0.000977547 | -0.233128417 | 1.02E-06    | 0.059231314  | 0.220293599 |
| 3.90E-09    | 0.320167918  | 1.05E-11    | 0.094132623  | 0.051101452 |
| 0.360337937 | 0.349620787  | 8.29E-14    | -0.086826872 | 0.072076047 |
| 0.660195681 | 0.020560448  | 0.670724116 | 0.476668915  | 8.89E-26    |
| 0.717033995 | 0.140197081  | 0.003578298 | 0.246748662  | 2.19E-07    |
| 3.67E-13    | 0.13282369   | 0.005806636 | 0.29594793   | 3.85E-10    |

|              |               |              |               |              |
|--------------|---------------|--------------|---------------|--------------|
| 1. 67E-05    | -0. 148286621 | 0. 002048924 | 0. 259985315  | 4. 51E-08    |
| 0. 000502637 | 0. 13381559   | 0. 005447755 | 0. 238547517  | 5. 60E-07    |
| 0. 214990235 | 0. 111707529  | 0. 02050756  | 0. 107468676  | 0. 025847956 |
| 1. 65E-06    | 0. 176157368  | 0. 000241612 | -0. 171219823 | 0. 000361745 |
| 0. 985764202 | -0. 006640148 | 0. 89079862  | -0. 153950436 | 0. 001363814 |
| 0. 255609116 | 0. 576888117  | 1. 64E-39    | -0. 042807834 | 0. 375884771 |
| 0. 686634871 | 0. 054981339  | 0. 255262788 | 0. 133455162  | 0. 005575787 |
| 0. 063399211 | 0. 035771295  | 0. 459392856 | -0. 264163297 | 2. 68E-08    |
| 4. 52E-07    | 0. 047759886  | 0. 323127593 | -0. 272256025 | 9. 58E-09    |
| 0. 083115175 | -0. 027299472 | 0. 572378991 | -0. 286914424 | 1. 36E-09    |
| 0. 263506253 | 0. 244119744  | 2. 97E-07    | -0. 155818854 | 0. 001188841 |
| 0. 155629801 | 0. 190254409  | 7. 19E-05    | -0. 235092716 | 8. 22E-07    |
| 0. 00563889  | -0. 060645228 | 0. 209456598 | -0. 288616603 | 1. 08E-09    |
| 9. 91E-08    | 0. 015042395  | 0. 755773744 | 0. 106348457  | 0. 027445244 |
| 6. 28E-11    | 0. 040204961  | 0. 405625001 | 0. 14623072   | 0. 002367083 |
| 0. 754521943 | -0. 042487029 | 0. 379476038 | -0. 080989759 | 0. 093482448 |
| 1. 27E-07    | 0. 458274525  | 1. 03E-23    | 0. 018362457  | 0. 704171349 |
| 0. 666471432 | -0. 051607454 | 0. 285632627 | -0. 018838154 | 0. 696881347 |
| 2. 72E-05    | -0. 159476267 | 0. 000904676 | 0. 261373849  | 3. 80E-08    |
| 0. 727401288 | 0. 055168663  | 0. 253644762 | -0. 318448356 | 1. 37E-11    |
| 0. 023243846 | 0. 286405153  | 1. 46E-09    | 0. 220854885  | 3. 77E-06    |
| 1. 88E-06    | 0. 090762964  | 0. 060039246 | -0. 172447135 | 0. 000327546 |
| 0. 002044089 | 0. 141844118  | 0. 003201497 | 0. 066334698  | 0. 169735486 |
| 0. 65384439  | 0. 029029889  | 0. 54827244  | -0. 330224023 | 2. 13E-12    |
| 1. 02E-06    | -0. 141542087 | 0. 003267773 | 0. 032398786  | 0. 502822205 |
| 0. 499886758 | 0. 078783298  | 0. 102791938 | -0. 062432528 | 0. 196315331 |
| 4. 55E-08    | 0. 049104047  | 0. 309680752 | -0. 221391684 | 3. 57E-06    |
| 0. 634530335 | 0. 076485284  | 0. 113253695 | -0. 175383765 | 0. 000257569 |
| 0. 137146218 | 0. 148775215  | 0. 001979303 | 0. 363165787  | 7. 49E-15    |
| 0. 00032596  | 0. 121108522  | 0. 011960523 | 0. 409135153  | 8. 78E-19    |
| 0. 556720904 | 0. 284777137  | 1. 82E-09    | -0. 129016899 | 0. 007389362 |
| 0. 000353897 | -0. 001433082 | 0. 976361715 | -0. 312447924 | 3. 43E-11    |
| 0. 000365458 | 0. 178205593  | 0. 000203714 | 0. 121500877  | 0. 011685235 |
| 0. 178850702 | -0. 133249278 | 0. 00565013  | 0. 254100864  | 9. 21E-08    |
| 0. 108031152 | 0. 067612802  | 0. 161642211 | -0. 268380416 | 1. 58E-08    |
| 0. 015996352 | -0. 139096127 | 0. 003852125 | 0. 16425309   | 0. 000627683 |
| 8. 77E-05    | 0. 0672543    | 0. 163882463 | 0. 001562842  | 0. 974222065 |
| 0. 085413009 | 0. 062906317  | 0. 192934912 | -0. 160231012 | 0. 000854472 |
| 2. 06E-12    | -0. 099953541 | 0. 038280515 | 0. 19935338   | 3. 13E-05    |
| 0. 008435967 | 0. 150987296  | 0. 001690377 | -0. 076724291 | 0. 112128119 |
| 7. 47E-05    | 0. 163654971  | 0. 000657439 | 0. 063347177  | 0. 189827894 |
| 0. 400301177 | 0. 032188409  | 0. 505601188 | -0. 073823942 | 0. 126394393 |
| 0. 467129412 | 0. 041444524  | 0. 391290889 | -0. 227115499 | 1. 95E-06    |
| 0. 131700447 | -0. 231548629 | 1. 21E-06    | -0. 091560482 | 0. 057814952 |
| 0. 015516791 | -0. 264939361 | 2. 43E-08    | 0. 01767636   | 0. 714733439 |
| 0. 001451887 | 0. 093956528  | 0. 051539347 | 0. 060055585  | 0. 213928233 |
| 1. 47E-12    | 0. 00826222   | 0. 864354897 | 0. 299523039  | 2. 31E-10    |
| 0. 019901921 | -0. 195228702 | 4. 58E-05    | -0. 093816086 | 0. 051890823 |
| 0. 000101669 | 0. 193741517  | 5. 25E-05    | 0. 410900269  | 6. 03E-19    |
| 0. 000605821 | 0. 32520546   | 4. 75E-12    | -0. 059587504 | 0. 217526531 |
| 0. 043938538 | 0. 079409251  | 0. 100079205 | -0. 009850474 | 0. 83860816  |

|              |               |              |               |              |
|--------------|---------------|--------------|---------------|--------------|
| 7. 61E-14    | -0. 013279853 | 0. 78363323  | 0. 161465919  | 0. 000777849 |
| 0. 017366152 | -0. 008392672 | 0. 86223436  | 0. 000731479  | 0. 987933164 |
| 0. 001305539 | 0. 283627126  | 2. 13E-09    | -0. 163309562 | 0. 000675213 |
| 3. 20E-11    | 0. 076047981  | 0. 115336071 | 0. 182942519  | 0. 000136307 |
| 1. 17E-05    | 0. 409968153  | 7. 35E-19    | 0. 161736862  | 0. 000761911 |
| 0. 389864458 | 0. 071885048  | 0. 136691068 | -0. 134121355 | 0. 005341222 |
| 0. 009332362 | -0. 245306638 | 2. 59E-07    | -0. 057731241 | 0. 23222289  |
| 6. 24E-09    | -0. 024409794 | 0. 613717529 | -0. 053179078 | 0. 271195504 |
| 0. 261839934 | 0. 207752022  | 1. 41E-05    | -0. 303235122 | 1. 35E-10    |
| 0. 34393591  | 0. 103097651  | 0. 032569236 | 0. 00698863   | 0. 885106249 |
| 9. 04E-10    | 0. 073469006  | 0. 128232908 | -0. 147440011 | 0. 00217488  |
| 0. 596548878 | -0. 141449823 | 0. 003288266 | 0. 11393295   | 0. 01810874  |
| 0. 209747342 | 0. 108570494  | 0. 024355701 | -0. 173260874 | 0. 00030656  |
| 4. 42E-13    | 0. 102265084  | 0. 034005878 | 0. 402163492  | 3. 80E-18    |
| 4. 51E-10    | -0. 01066144  | 0. 825526123 | 0. 144986966  | 0. 002580817 |
| 1. 47E-06    | 0. 165010347  | 0. 0005918   | -0. 218763724 | 4. 68E-06    |
| 9. 71E-23    | -0. 063800951 | 0. 186668394 | 0. 3886396    | 5. 93E-17    |
| 0. 08850939  | 0. 018441817  | 0. 702953255 | -0. 280556789 | 3. 22E-09    |
| 6. 94E-05    | 0. 186441097  | 0. 000100649 | -0. 152113353 | 0. 001558649 |
| 0. 160514708 | 0. 15884831   | 0. 000948508 | 0. 054236259  | 0. 261769173 |
| 1. 38E-13    | 0. 001545918  | 0. 974501124 | -0. 124257353 | 0. 009904158 |
| 0. 09307616  | 0. 215716171  | 6. 38E-06    | -0. 323300464 | 6. 42E-12    |
| 0. 264417533 | -0. 029277923 | 0. 544858455 | -0. 411305104 | 5. 53E-19    |
| 0. 749516648 | 0. 034139931  | 0. 480134778 | -0. 00587684  | 0. 903286257 |
| 0. 054177089 | 0. 039775745  | 0. 410660345 | -0. 350787483 | 6. 77E-14    |
| 0. 240169034 | -0. 238960133 | 5. 34E-07    | 0. 090658294  | 0. 060336354 |
| 0. 00106984  | -0. 144993876 | 0. 002579582 | 0. 1692887    | 0. 000422355 |
| 0. 493502881 | 0. 059467507  | 0. 218455933 | 0. 539114825  | 8. 64E-34    |
| 9. 89E-05    | 0. 018173475  | 0. 707075054 | -0. 233457584 | 9. 84E-07    |
| 0. 000865988 | 0. 384920382  | 1. 23E-16    | 0. 119103882  | 0. 013458355 |
| 0. 5772584   | 0. 216198619  | 6. 08E-06    | -0. 132600628 | 0. 005890211 |
| 0. 026475041 | 0. 272895143  | 8. 82E-09    | -0. 066439693 | 0. 169059428 |
| 0. 047643271 | 0. 523799642  | 1. 14E-31    | 0. 014998099  | 0. 75647021  |
| 8. 91E-06    | 0. 049443092  | 0. 30634801  | -0. 429783649 | 9. 30E-21    |
| 3. 46E-12    | 0. 121663483  | 0. 011572797 | 0. 033336541  | 0. 490533429 |
| 2. 55E-14    | -0. 135988669 | 0. 004730331 | 0. 058621739  | 0. 225087295 |
| 0. 884832783 | -0. 310632345 | 4. 51E-11    | -0. 081043044 | 0. 093266257 |
| 0. 03341312  | -0. 247369015 | 2. 04E-07    | -0. 111466732 | 0. 020782978 |
| 0. 003922199 | -0. 136527762 | 0. 004566093 | 0. 089153635  | 0. 064743201 |
| 0. 899273603 | 0. 466580908  | 1. 25E-24    | 0. 136314647  | 0. 004630394 |
| 6. 98E-09    | 0. 025992382  | 0. 590914415 | 0. 114869769  | 0. 017174557 |
| 7. 91E-09    | 0. 128880238  | 0. 007452745 | 0. 003667391  | 0. 939556323 |
| 0. 00360704  | 0. 097547925  | 0. 043203986 | -0. 252540905 | 1. 11E-07    |
| 0. 420731141 | 0. 244125866  | 2. 97E-07    | 0. 075267256  | 0. 119128244 |
| 0. 514185458 | 0. 027790119  | 0. 565493031 | -0. 256535972 | 6. 86E-08    |
| 0. 000252503 | 0. 325632806  | 4. 44E-12    | -0. 177874383 | 0. 000209439 |
| 0. 003870059 | 0. 207577325  | 1. 43E-05    | 0. 012628618  | 0. 793999397 |
| 0. 063729934 | -0. 074205214 | 0. 124442322 | -0. 022542738 | 0. 641104778 |
| 7. 97E-16    | 0. 044101124  | 0. 361620131 | 0. 15625065   | 0. 001151462 |
| 6. 65E-07    | 0. 220278824  | 4. 00E-06    | 0. 026924616  | 0. 577666496 |
| 0. 002257376 | 0. 109919996  | 0. 022629864 | -0. 024951936 | 0. 605862392 |



|             |              |             |              |             |
|-------------|--------------|-------------|--------------|-------------|
| 0.000148384 | 0.001571988  | 0.97407127  | -0.335780106 | 8.60E-13    |
| 0.086399266 | 0.170851151  | 0.00037265  | -0.05678909  | 0.239944992 |
| 0.000894909 | 0.288339038  | 1.12E-09    | 0.165911953  | 0.000551561 |
| 0.889008808 | 0.381083191  | 2.60E-16    | 0.037331264  | 0.440035433 |
| 0.019228233 | 0.29729617   | 3.18E-10    | -0.173681406 | 0.000296214 |
| 8.31E-07    | 0.145925334  | 0.002418012 | -0.337145466 | 6.86E-13    |
| 0.026950828 | -0.006316741 | 0.896086412 | -0.168594082 | 0.000446376 |
| 8.30E-09    | 0.00233146   | 0.961552451 | 0.249161794  | 1.65E-07    |
| 3.78E-06    | 0.114224761  | 0.017813105 | -0.299119469 | 2.45E-10    |
| 0.062938631 | 0.565838774  | 9.21E-38    | 0.083319638  | 0.084396851 |
| 5.66E-12    | -0.344689838 | 1.93E-13    | -0.166315571 | 0.000534384 |
| 4.91E-05    | 0.048184917  | 0.31883522  | 0.338958635  | 5.08E-13    |
| 5.24E-06    | 0.092106879  | 0.056330785 | -0.093114451 | 0.053676821 |
| 0.000420561 | 0.072115876  | 0.135432433 | -0.231930726 | 1.16E-06    |
| 3.07E-08    | 0.241373687  | 4.07E-07    | -0.243165205 | 3.32E-07    |
| 0.051483633 | 0.033656044  | 0.486383567 | -0.10958479  | 0.023048353 |
| 0.031763013 | 0.011383423  | 0.813919866 | -0.319220989 | 1.22E-11    |
| 1.28E-07    | 0.192302754  | 5.98E-05    | 0.092491673  | 0.055304656 |
| 0.033577789 | 0.11789038   | 0.014443249 | -0.256855846 | 6.60E-08    |
| 1.13E-06    | 0.045699126  | 0.344468598 | -0.114318511 | 0.017719026 |
| 0.904072934 | 0.072189742  | 0.135031554 | -0.026483347 | 0.583919976 |
| 0.216282669 | 0.2021615    | 2.40E-05    | -0.030111172 | 0.533467075 |
| 0.004226048 | 0.11351942   | 0.018535018 | 0.227791525  | 1.82E-06    |
| 0.94788415  | -0.108701001 | 0.024183976 | 0.098457071  | 0.041283961 |
| 0.092039503 | -0.101171051 | 0.035975482 | 0.034605382  | 0.474165472 |
| 1.83E-07    | -0.083816936 | 0.082552938 | 0.106608547  | 0.027067016 |
| 0.092983075 | 0.06934688   | 0.151130344 | -0.316993946 | 1.71E-11    |
| 0.193461199 | 0.20881772   | 1.27E-05    | -0.137992729 | 0.004145457 |
| 0.179769962 | 0.032746801  | 0.498242813 | -0.25957168  | 4.74E-08    |
| 0.000639705 | 0.099908695  | 0.038367756 | 0.34187562   | 3.11E-13    |
| 0.203199238 | 0.153807262  | 0.001378154 | -0.203306849 | 2.16E-05    |
| 0.273769987 | 0.200063569  | 2.93E-05    | -0.145137552 | 0.002554035 |
| 0.498636664 | 0.222093341  | 3.32E-06    | -0.299869047 | 2.20E-10    |
| 0.490003573 | 0.036650974  | 0.448419132 | -0.161051765 | 0.000802808 |
| 0.282311091 | -0.111176469 | 0.021119237 | -0.288250582 | 1.13E-09    |
| 0.920248487 | 0.048358501  | 0.317092946 | -0.3761272   | 6.73E-16    |
| 0.205032211 | 0.189507637  | 7.68E-05    | 0.17623809   | 0.000240002 |
| 0.276347933 | -0.028055479 | 0.561785449 | 0.231823697  | 1.18E-06    |
| 0.58183766  | 0.046081641  | 0.340441029 | -0.183589499 | 0.000128926 |
| 0.296283275 | 0.239682524  | 4.93E-07    | -0.211526171 | 9.70E-06    |
| 1.57E-19    | -0.045348775 | 0.348183976 | -0.148170219 | 0.002065837 |
| 6.17E-08    | 0.1847047    | 0.000117079 | 0.115798337  | 0.016290452 |
| 0.00576618  | -0.026618546 | 0.58200066  | -0.382925878 | 1.82E-16    |
| 0.015541534 | 0.055266675  | 0.252801016 | -0.270018554 | 1.28E-08    |
| 1.23E-06    | 0.068605157  | 0.155561278 | -0.250274525 | 1.45E-07    |
| 0.000847367 | 0.20991308   | 1.14E-05    | 0.285335276  | 1.69E-09    |
| 0.848570471 | 0.219970961  | 4.13E-06    | 0.064559088  | 0.181476343 |
| 1.00E-20    | 0.094204269  | 0.050924183 | -0.108499163 | 0.024450004 |
| 1.77E-06    | 0.10703993   | 0.026449572 | -0.087467826 | 0.069991466 |
| 0.384859147 | 0.0874864    | 0.069931801 | -0.339782329 | 4.42E-13    |
| 0.912769808 | 0.447181666  | 1.57E-22    | -0.046296782 | 0.338189037 |

|             |              |             |              |             |
|-------------|--------------|-------------|--------------|-------------|
| 0.007016378 | -0.184588015 | 0.000118269 | 0.22769398   | 1.84E-06    |
| 0.000172462 | -0.052257776 | 0.279597095 | 0.333191524  | 1.31E-12    |
| 2.21E-23    | -0.094204707 | 0.0509231   | 0.311638678  | 3.88E-11    |
| 0.000503016 | -0.050070707 | 0.300241412 | 0.1961973    | 4.19E-05    |
| 0.882516758 | 0.150341494  | 0.001770452 | -0.035316144 | 0.465129037 |
| 0.019009207 | -0.201913538 | 2.46E-05    | -0.026594516 | 0.582341575 |
| 0.004770981 | 0.136585432  | 0.004548832 | 0.053844801  | 0.265232951 |
| 0.025189396 | 0.187682646  | 9.03E-05    | -0.07529285  | 0.119002402 |
| 1.62E-06    | 0.295472402  | 4.12E-10    | 0.215032962  | 6.83E-06    |
| 0.794438826 | -0.004114142 | 0.93220996  | -0.249796221 | 1.54E-07    |
| 0.796056055 | 0.120366032  | 0.012497196 | -0.161737297 | 0.000761886 |
| 0.085787151 | 0.323076974  | 6.65E-12    | -0.033059121 | 0.494152033 |
| 0.038709574 | 0.106093626  | 0.027820224 | -0.057819786 | 0.231506294 |
| 0.005784286 | 0.003566553  | 0.941215224 | -0.220031884 | 4.11E-06    |
| 0.486346119 | 0.031128907  | 0.519718226 | -0.281488966 | 2.84E-09    |
| 0.287711098 | 0.029435613  | 0.54269347  | -0.236402104 | 7.11E-07    |
| 0.773997447 | 0.232156202  | 1.13E-06    | 0.360336627  | 1.25E-14    |
| 0.013291738 | -0.013494579 | 0.780223569 | -0.177166986 | 0.000222175 |
| 4.65E-05    | 0.342190917  | 2.95E-13    | -0.010258115 | 0.832026534 |
| 4.51E-10    | 0.041967925  | 0.385331542 | -0.314981561 | 2.33E-11    |
| 0.001803792 | 0.192931045  | 5.65E-05    | -0.143566909 | 0.00284625  |
| 0.698733548 | -0.071460965 | 0.139026879 | 0.106404928  | 0.027362739 |
| 2.74E-11    | 0.257938292  | 5.79E-08    | -0.141244398 | 0.003334313 |
| 0.648008005 | 0.053502146  | 0.268290608 | 0.003745633  | 0.938269319 |
| 0.003321425 | 0.027134543  | 0.574702563 | -0.291939865 | 6.78E-10    |
| 2.59E-07    | 0.038408204  | 0.426948474 | -0.017677654 | 0.714713465 |
| 0.012509187 | 0.002022384  | 0.96664616  | -0.206161498 | 1.64E-05    |
| 0.022676015 | -0.068456811 | 0.156459148 | 0.168868347  | 0.000436743 |
| 0.076559745 | 0.047846365  | 0.322251217 | -0.390743708 | 3.90E-17    |
| 0.120014836 | 0.141295325  | 0.003322843 | 0.041391817  | 0.391894075 |
| 0.000267467 | 0.105833954  | 0.028206847 | 0.422589969  | 4.70E-20    |
| 0.051024989 | 0.007604969  | 0.875053164 | -0.144049634 | 0.002753355 |
| 1.13E-05    | 0.277142214  | 5.06E-09    | 0.055278641  | 0.252698146 |
| 5.76E-09    | -0.074143458 | 0.124756906 | 0.124627369  | 0.009684419 |
| 0.075780112 | -0.078925532 | 0.102170467 | 0.089480154  | 0.063765058 |
| 0.019163401 | 0.263408711  | 2.95E-08    | 0.005445931  | 0.910346621 |
| 4.50E-06    | 0.021873523  | 0.651043627 | -0.264294282 | 2.64E-08    |
| 0.007621511 | 0.013817237  | 0.775107957 | -0.379420098 | 3.59E-16    |
| 0.163510172 | 0.074642713  | 0.122231337 | -0.110185467 | 0.022303121 |
| 0.765523059 | 0.09183653   | 0.057061129 | -0.357377708 | 2.12E-14    |
| 0.838898823 | 0.001072973  | 0.982300472 | 0.231815778  | 1.18E-06    |
| 0.776859252 | 0.094976501  | 0.049045848 | -0.225663534 | 2.28E-06    |
| 0.001975768 | 0.046317686  | 0.33797073  | -0.171686899 | 0.000348355 |
| 0.00332568  | 0.38404922   | 1.46E-16    | -0.061487999 | 0.203183045 |
| 0.515539101 | 0.058647966  | 0.224879524 | 0.277304978  | 4.96E-09    |
| 4.08E-11    | 0.12692477   | 0.008414438 | -0.103788461 | 0.031416838 |
| 1.53E-17    | 0.099508449  | 0.039153849 | 0.214839163  | 6.97E-06    |
| 0.33333012  | -0.017479839 | 0.717768927 | 0.219812508  | 4.20E-06    |
| 0.000492995 | -0.002174057 | 0.964146342 | -0.306138406 | 8.81E-11    |
| 0.209197148 | -0.158035976 | 0.001008118 | 0.185274916  | 0.000111424 |
| 2.30E-08    | 0.178910697  | 0.000192009 | 0.225418087  | 2.34E-06    |

|             |              |             |              |             |
|-------------|--------------|-------------|--------------|-------------|
| 0.015638289 | 0.303216574  | 1.35E-10    | -0.045001738 | 0.351889138 |
| 0.460776284 | -0.029312338 | 0.544385593 | -0.290470189 | 8.32E-10    |
| 0.851830905 | 0.372280787  | 1.39E-15    | -0.230576188 | 1.35E-06    |
| 0.036261213 | 0.142849333  | 0.002989615 | -0.116359038 | 0.015776119 |
| 0.000150761 | 0.15987783   | 0.000877635 | -0.145081225 | 0.002564023 |
| 0.283274552 | 0.101170837  | 0.035975876 | -0.194437482 | 4.93E-05    |
| 0.150188775 | 0.044670267  | 0.355451251 | -0.242345088 | 3.64E-07    |
| 0.003049386 | 0.069843954  | 0.148214972 | -0.147301751 | 0.002196109 |
| 2.20E-06    | -0.064087266 | 0.184694881 | -0.259465323 | 4.80E-08    |
| 0.628171346 | -0.382516455 | 1.97E-16    | -0.000468274 | 0.992274948 |
| 0.399703985 | 0.130573523  | 0.006700667 | -0.142602016 | 0.003040529 |
| 0.209242144 | -0.038431066 | 0.426673129 | -0.209144894 | 1.23E-05    |
| 0.00015431  | -0.007466282 | 0.877313599 | 0.045774349  | 0.343674175 |
| 0.056368311 | -0.00949589  | 0.84434232  | -0.268688056 | 1.52E-08    |
| 0.002352073 | -0.071725039 | 0.137568814 | -0.141076561 | 0.003372368 |
| 0.005930869 | 0.040931176  | 0.397189609 | 0.481345292  | 2.54E-26    |
| 0.32712548  | 0.015074483  | 0.755269338 | -0.046182426 | 0.339384868 |
| 0.274423865 | 0.022661335  | 0.63935003  | -0.203037073 | 2.21E-05    |
| 2.53E-09    | 0.155485156  | 0.00121849  | -0.329924068 | 2.23E-12    |
| 0.166084181 | 0.008976208  | 0.852761177 | -0.320981532 | 9.24E-12    |
| 0.765454772 | -0.073037891 | 0.130493801 | -0.217540612 | 5.30E-06    |
| 4.14E-05    | -0.077670508 | 0.107758089 | 0.202378231  | 2.36E-05    |
| 3.57E-09    | 0.032200487  | 0.505441417 | 0.436648652  | 1.91E-21    |
| 0.008763755 | -0.059201303 | 0.220527882 | 0.099631269  | 0.03891119  |
| 0.134893002 | 0.121500527  | 0.011685478 | 0.41310548   | 3.75E-19    |
| 0.068286271 | 0.078874647  | 0.102392457 | -0.267402452 | 1.78E-08    |
| 1.63E-16    | 0.102335724  | 0.033881923 | -0.094318118 | 0.050643545 |
| 5.36E-06    | 0.186660036  | 9.87E-05    | -0.011616972 | 0.810174015 |
| 0.073122729 | 0.003621082  | 0.940318117 | -0.351087644 | 6.42E-14    |
| 0.143413525 | 0.108967556  | 0.023836482 | -0.260380409 | 4.29E-08    |
| 0.019401057 | 0.002913563  | 0.951963538 | -0.23674465  | 6.84E-07    |
| 2.85E-05    | -0.033283547 | 0.491223573 | 0.263217774  | 3.02E-08    |
| 0.950338291 | 0.344056088  | 2.15E-13    | 0.166685656  | 0.000519071 |
| 0.000324202 | 0.164070587  | 0.000636627 | 0.292581446  | 6.20E-10    |
| 1.06E-06    | -0.185311454 | 0.00011107  | 0.214283127  | 7.37E-06    |
| 0.696677341 | 0.097221074  | 0.043912395 | -0.105770026 | 0.028302733 |
| 1.84E-10    | -0.010518511 | 0.827828368 | 0.207530026  | 1.44E-05    |
| 0.000153244 | 0.040673252  | 0.400173393 | -0.337082997 | 6.93E-13    |
| 1.63E-07    | 0.267014638  | 1.87E-08    | -0.137793822 | 0.004200435 |
| 0.003665438 | 0.144584064  | 0.002653736 | -0.046115051 | 0.340090678 |
| 0.002795251 | 0.176460521  | 0.000235615 | -0.049792881 | 0.302934567 |
| 6.12E-05    | -0.046954281 | 0.331365888 | -0.164997703 | 0.000592383 |
| 0.015667353 | 0.117777221  | 0.014538241 | -0.277415134 | 4.88E-09    |
| 2.02E-10    | 0.206706345  | 1.56E-05    | 0.118297457  | 0.014106021 |
| 0.017378207 | -0.007981358 | 0.868923646 | -0.137603944 | 0.004253531 |
| 7.90E-07    | 0.288638475  | 1.07E-09    | -0.1222717   | 0.011160666 |
| 0.024631686 | 0.18070973   | 0.000164936 | -0.160665652 | 0.000826742 |
| 0.810483739 | 0.07500256   | 0.12043581  | -0.252182034 | 1.16E-07    |
| 0.542463625 | -0.060213671 | 0.212722689 | 0.220860924  | 3.77E-06    |
| 0.06338692  | 0.160725634  | 0.000822981 | -0.212699342 | 8.64E-06    |
| 0.649346289 | 0.01142508   | 0.813251425 | -0.339673011 | 4.50E-13    |

|              |               |              |               |              |
|--------------|---------------|--------------|---------------|--------------|
| 1. 29E-07    | -0. 020604943 | 0. 670053414 | -0. 216189599 | 6. 08E-06    |
| 3. 61E-16    | 0. 052293452  | 0. 279268509 | 0. 10293834   | 0. 032840058 |
| 0. 001501755 | -0. 083582283 | 0. 083418903 | 0. 016807087  | 0. 728193761 |
| 0. 200107412 | 0. 25736928   | 6. 20E-08    | 0. 086482153  | 0. 073217968 |
| 0. 586720913 | -0. 165296496 | 0. 000578743 | 0. 215864601  | 6. 28E-06    |
| 0. 94777442  | 0. 249768482  | 1. 54E-07    | -0. 270687086 | 1. 17E-08    |
| 0. 007309132 | 0. 081469246  | 0. 091551378 | -0. 199046562 | 3. 22E-05    |
| 0. 548281988 | -0. 068710543 | 0. 154925797 | 0. 021385169  | 0. 658335771 |
| 7. 87E-06    | -0. 018607011 | 0. 70042015  | 0. 194778928  | 4. 78E-05    |
| 0. 010766499 | -0. 152716079 | 0. 001492076 | 0. 076712745  | 0. 112182291 |
| 0. 485515644 | 0. 166370089  | 0. 000532102 | 0. 102111464  | 0. 034276774 |
| 0. 181947184 | 0. 127302009  | 0. 008220729 | -0. 238703052 | 5. 50E-07    |
| 1. 97E-14    | 0. 043418444  | 0. 369107277 | -0. 15770916  | 0. 00103306  |
| 0. 169560639 | 0. 276833219  | 5. 27E-09    | -0. 055342167 | 0. 25215247  |
| 0. 423888267 | 0. 162155736  | 0. 000737866 | -0. 235285657 | 8. 05E-07    |
| 0. 001133763 | 0. 013969464  | 0. 772697814 | -0. 236804139 | 6. 80E-07    |
| 0. 988015008 | 0. 23166128   | 1. 20E-06    | -0. 160850828 | 0. 000815182 |
| 2. 16E-14    | 0. 055263552  | 0. 252827873 | 0. 187489657  | 9. 18E-05    |
| 2. 58E-08    | 0. 18235539   | 0. 000143346 | -0. 259183542 | 4. 97E-08    |
| 0. 000230804 | -0. 019540807 | 0. 686164278 | 0. 209150991  | 1. 23E-05    |
| 3. 42E-06    | 0. 392580276  | 2. 70E-17    | 0. 055511214  | 0. 250704388 |
| 5. 61E-09    | 0. 423281453  | 4. 03E-20    | 0. 114386268  | 0. 017651301 |
| 0. 000279553 | 0. 038624519  | 0. 424347353 | -0. 23310998  | 1. 02E-06    |
| 0. 014144059 | 0. 182417261  | 0. 000142588 | -0. 152239417 | 0. 001544503 |
| 0. 007889267 | 0. 198946894  | 3. 25E-05    | -0. 007599638 | 0. 875140037 |
| 0. 617480611 | -0. 202180823 | 2. 40E-05    | 0. 008592972  | 0. 858980378 |
| 0. 748357124 | 0. 04238083   | 0. 380669507 | 0. 23754046   | 6. 26E-07    |
| 5. 30E-08    | -0. 136362875 | 0. 004615772 | -0. 316622619 | 1. 81E-11    |
| 0. 45702982  | 0. 021775973  | 0. 652497632 | -0. 17224399  | 0. 00033299  |
| 4. 29E-05    | -0. 187398501 | 9. 25E-05    | 0. 017362339  | 0. 719585974 |
| 0. 039360013 | 0. 106964571  | 0. 026556551 | -0. 266516664 | 2. 00E-08    |
| 0. 152659183 | 0. 189598614  | 7. 62E-05    | 0. 031440644  | 0. 515543632 |
| 3. 38E-15    | 0. 071429926  | 0. 139199035 | 0. 218914503  | 4. 61E-06    |
| 0. 000357217 | -0. 078031933 | 0. 106124782 | -0. 334213145 | 1. 11E-12    |
| 2. 99E-05    | 0. 201890538  | 2. 47E-05    | -0. 278193613 | 4. 41E-09    |
| 2. 12E-05    | 0. 209576453  | 1. 18E-05    | -0. 214498317 | 7. 21E-06    |
| 0. 485119815 | -0. 145611742 | 0. 002471347 | 0. 203738797  | 2. 07E-05    |
| 4. 98E-08    | 0. 284513028  | 1. 89E-09    | 0. 034746344  | 0. 472365704 |
| 0. 499980841 | -0. 079259504 | 0. 100722939 | -0. 380573813 | 2. 87E-16    |
| 4. 67E-18    | -0. 068708519 | 0. 154937986 | 0. 011503631  | 0. 811991332 |
| 0. 000150218 | 0. 126402607  | 0. 008689275 | 0. 179375954  | 0. 000184634 |
| 0. 49065833  | 0. 043193118  | 0. 371599423 | -0. 352843815 | 4. 73E-14    |
| 1. 61E-05    | 0. 042068299  | 0. 384195046 | -0. 251503946 | 1. 25E-07    |
| 0. 696214172 | 0. 017174793  | 0. 722489507 | -0. 300169324 | 2. 11E-10    |
| 0. 000906815 | 0. 07040798   | 0. 14495899  | -0. 413297061 | 3. 60E-19    |
| 0. 509099324 | -0. 066583384 | 0. 168137476 | 0. 297755664  | 2. 98E-10    |
| 1. 27E-14    | 0. 066176492  | 0. 170757978 | -0. 11623198  | 0. 015891405 |
| 5. 85E-06    | 0. 214710918  | 7. 06E-06    | -0. 061263893 | 0. 204837814 |
| 0. 045620676 | -0. 079655522 | 0. 099027642 | -0. 329906366 | 2. 24E-12    |
| 0. 331596854 | 0. 322048407  | 7. 82E-12    | -0. 21732106  | 5. 42E-06    |
| 0. 941411554 | 0. 104096493  | 0. 030914329 | -0. 2511211   | 1. 31E-07    |

|             |              |             |              |             |
|-------------|--------------|-------------|--------------|-------------|
| 0.153541768 | -0.210741339 | 1.05E-05    | 0.021124953  | 0.662234662 |
| 0.133162809 | -0.059196249 | 0.220567355 | -0.033675356 | 0.486133336 |
| 0.742865343 | 0.050628796  | 0.294879675 | -0.3172551   | 1.65E-11    |
| 0.012802067 | 0.098986982  | 0.040198432 | -0.239856544 | 4.83E-07    |
| 0.727194805 | 0.120442142  | 0.012441223 | -0.187568036 | 9.12E-05    |
| 0.295132393 | 0.334215194  | 1.11E-12    | -0.097020385 | 0.044352186 |
| 2.27E-12    | 0.089415909  | 0.063956548 | -0.119361719 | 0.013256876 |
| 1.06E-10    | 0.317019179  | 1.71E-11    | 0.066548728  | 0.168359495 |
| 0.094669684 | 0.345522662  | 1.68E-13    | -0.229989876 | 1.44E-06    |
| 0.093142422 | -0.387860647 | 6.91E-17    | 0.006226594  | 0.897561164 |
| 4.95E-06    | 0.201101227  | 2.66E-05    | 0.25740993   | 6.17E-08    |
| 0.863461347 | 0.023139109  | 0.632301388 | -0.281776284 | 2.73E-09    |
| 0.006468811 | 0.099686316  | 0.038802845 | -0.266821478 | 1.92E-08    |
| 0.451105098 | 0.184449619  | 0.000119695 | -0.317179328 | 1.67E-11    |
| 0.547925787 | 0.039442908  | 0.414590364 | -0.284994771 | 1.77E-09    |
| 1.50E-06    | 0.140824379  | 0.003430288 | -0.180570783 | 0.000166893 |
| 2.99E-09    | -0.097905707 | 0.042439598 | 0.226074355  | 2.18E-06    |
| 4.79E-07    | 0.183893198  | 0.000125593 | -0.365054419 | 5.31E-15    |
| 4.75E-15    | 0.116947418  | 0.015251753 | -0.187540351 | 9.14E-05    |
| 0.950339816 | -0.101685726 | 0.035037148 | 0.047823417  | 0.322483621 |
| 1.50E-06    | 0.185581115  | 0.000108494 | -0.080988814 | 0.093486288 |
| 0.000191575 | 0.399510571  | 6.58E-18    | 0.238264089  | 5.78E-07    |
| 0.26405208  | -0.001834904 | 0.969736589 | -0.160284802 | 0.000850994 |
| 0.005044069 | 0.011467508  | 0.812570752 | -0.177931458 | 0.000208442 |
| 1.08E-08    | 0.119244025  | 0.013348513 | -0.206713531 | 1.55E-05    |
| 3.36E-09    | 0.479963876  | 3.68E-26    | 0.080546971  | 0.095294509 |
| 4.59E-06    | -0.004491469 | 0.926009668 | 0.253364449  | 1.01E-07    |
| 1.82E-11    | 0.249639992  | 1.56E-07    | 0.180401875  | 0.0001693   |
| 2.10E-08    | -0.025353535 | 0.600072677 | 0.39488457   | 1.69E-17    |
| 0.371891513 | -0.132443633 | 0.005949679 | 0.181923651  | 0.000148738 |
| 0.909500091 | 0.221305659  | 3.60E-06    | 0.27190685   | 1.00E-08    |
| 0.936833234 | -0.059918455 | 0.214977932 | 0.074212895  | 0.124403239 |
| 0.768812886 | 0.083169586  | 0.084959701 | -0.255976642 | 7.34E-08    |
| 0.498482305 | -0.012586493 | 0.794671215 | -0.185474722 | 0.000109504 |
| 2.11E-10    | 0.006159873  | 0.898652907 | 0.046841401  | 0.332530942 |
| 0.08167899  | 0.071997876  | 0.136074733 | -0.433799462 | 3.70E-21    |
| 0.001100257 | -0.140386184 | 0.003533081 | -0.042523199 | 0.379070079 |
| 5.03E-09    | -0.029149671 | 0.546622417 | -0.066146731 | 0.170950839 |
| 0.72948913  | -0.107075883 | 0.026398664 | -0.274807964 | 6.88E-09    |
| 0.713012372 | 0.091217511  | 0.058762996 | 0.217821293  | 5.15E-06    |
| 0.398752904 | 0.122523151  | 0.010994113 | -0.124364847 | 0.00983987  |
| 0.236400433 | 0.168038637  | 0.000466492 | -0.155189521 | 0.001245324 |
| 0.491205478 | 0.092800314  | 0.054492867 | 0.037234056  | 0.441227881 |
| 0.121921325 | 0.008151268  | 0.866159209 | 0.15252869   | 0.001512489 |
| 0.011128067 | 0.170480336  | 0.000383927 | -0.00712843  | 0.8828243   |
| 0.266879687 | 0.006541398  | 0.892412703 | -0.288447396 | 1.10E-09    |
| 9.49E-08    | 0.317203273  | 1.66E-11    | 0.002211837  | 0.963523726 |
| 0.00348104  | -0.036023605 | 0.456230128 | -0.290644364 | 8.12E-10    |
| 0.068221395 | 0.461569321  | 4.48E-24    | -0.218743038 | 4.69E-06    |
| 0.222922613 | 0.215429714  | 6.57E-06    | 0.076234244  | 0.114445473 |
| 0.041786021 | 0.322122803  | 7.73E-12    | 0.05391826   | 0.264580568 |

|              |               |              |               |              |
|--------------|---------------|--------------|---------------|--------------|
| 4. 49E-14    | 0. 240581441  | 4. 45E-07    | 0. 089898911  | 0. 062528435 |
| 0. 194809268 | 0. 520922466  | 2. 78E-31    | -0. 141700828 | 0. 003232786 |
| 0. 142715399 | 0. 256767053  | 6. 67E-08    | -0. 123969934 | 0. 010077889 |
| 0. 33499983  | -0. 018325291 | 0. 704742075 | 0. 057906923  | 0. 230802618 |
| 1. 05E-06    | 0. 101538885  | 0. 035302716 | 0. 27411389   | 7. 53E-09    |
| 0. 044416016 | 0. 190590813  | 6. 97E-05    | 0. 081261686  | 0. 092383343 |
| 0. 010706762 | -0. 144838079 | 0. 002607548 | 0. 138081009  | 0. 004121266 |
| 0. 018777079 | 0. 036177869  | 0. 45430244  | -0. 247368689 | 2. 04E-07    |
| 1. 22E-05    | 0. 133714815  | 0. 005483284 | 0. 01463628   | 0. 762166435 |
| 0. 207361023 | 0. 020664019  | 0. 669163356 | -0. 372964143 | 1. 22E-15    |
| 0. 295909787 | 0. 042108122  | 0. 383744721 | -0. 304672612 | 1. 09E-10    |
| 3. 61E-31    | 0. 154436694  | 0. 001316131 | -0. 035255412 | 0. 465897411 |
| 9. 61E-06    | -0. 081860648 | 0. 089998854 | -0. 395851639 | 1. 39E-17    |
| 0. 002179944 | 0. 064317188  | 0. 183121248 | -0. 110539441 | 0. 02187381  |
| 0. 576455374 | 0. 023803586  | 0. 622553507 | -0. 090878457 | 0. 059712821 |
| 0. 270658544 | 0. 066470178  | 0. 168863514 | -0. 356557969 | 2. 45E-14    |
| 2. 03E-10    | -0. 042324229 | 0. 381306533 | 0. 07282516   | 0. 131620721 |
| 0. 001578064 | -0. 039832685 | 0. 409990239 | -0. 092253237 | 0. 055938646 |
| 0. 546719899 | 0. 065567417  | 0. 174737399 | 0. 284269177  | 1. 95E-09    |
| 0. 033016966 | 0. 274038369  | 7. 60E-09    | 0. 100694441  | 0. 036863372 |
| 0. 014032023 | 0. 098462847  | 0. 041271995 | -0. 306915506 | 7. 85E-11    |
| 0. 061787579 | 0. 179860578  | 0. 000177235 | -0. 137902921 | 0. 004170199 |
| 2. 35E-05    | 0. 257113449  | 6. 40E-08    | 0. 136116425  | 0. 004690935 |
| 0. 954165525 | 0. 137626194  | 0. 004247278 | -0. 11283487  | 0. 019259917 |
| 0. 003892565 | 0. 058482921  | 0. 226189257 | 0. 226693895  | 2. 04E-06    |
| 9. 50E-07    | -0. 032429305 | 0. 502419736 | 0. 293523534  | 5. 43E-10    |
| 0. 996325575 | -0. 10044876  | 0. 037328277 | 0. 328724202  | 2. 71E-12    |
| 1. 79E-07    | 0. 046679949  | 0. 33420189  | -0. 416836145 | 1. 67E-19    |
| 0. 306263124 | -0. 02402434  | 0. 619329473 | 0. 252382034  | 1. 13E-07    |
| 2. 29E-06    | 0. 009587332  | 0. 842862775 | -0. 013993192 | 0. 772322337 |
| 0. 000281995 | 0. 046284026  | 0. 338322291 | 0. 036729437  | 0. 447447594 |
| 0. 05173954  | 0. 016822151  | 0. 727959785 | -0. 029677912 | 0. 539375197 |
| 0. 114736899 | 0. 061138013  | 0. 205771568 | -0. 279552725 | 3. 68E-09    |
| 1. 23E-08    | 0. 229177137  | 1. 57E-06    | -0. 10557622  | 0. 028595137 |
| 0. 108810969 | 0. 051323187  | 0. 288298222 | -0. 217001381 | 5. 60E-06    |
| 4. 87E-06    | -0. 057747001 | 0. 232095226 | 0. 413231586  | 3. 65E-19    |
| 0. 253676975 | 0. 019739909  | 0. 683138794 | -0. 417826463 | 1. 35E-19    |
| 0. 238614214 | 0. 28963138   | 9. 35E-10    | -0. 168258    | 0. 000458449 |
| 2. 23E-18    | -0. 082007745 | 0. 089420873 | 0. 164678146  | 0. 0006073   |
| 0. 865362462 | -0. 006227796 | 0. 897541502 | 0. 352463171  | 5. 05E-14    |
| 0. 024211132 | 0. 215705266  | 6. 39E-06    | 0. 115043046  | 0. 017006462 |
| 0. 002801359 | 0. 003495807  | 0. 942379242 | -0. 248865866 | 1. 71E-07    |
| 0. 678221829 | -0. 008288349 | 0. 863930079 | -0. 085357779 | 0. 077045467 |
| 0. 599417263 | 0. 055858725  | 0. 247745752 | -0. 012115015 | 0. 802200535 |
| 1. 67E-12    | 0. 01868932   | 0. 699159254 | 0. 238768977  | 5. 46E-07    |
| 0. 057286467 | 0. 171921609  | 0. 000341803 | -0. 172320867 | 0. 00033092  |
| 0. 029964129 | 0. 065543879  | 0. 174892554 | 0. 12279652   | 0. 010815542 |
| 0. 27865239  | 0. 140951161  | 0. 003401057 | -0. 346329857 | 1. 46E-13    |
| 0. 656884353 | 0. 145841653  | 0. 00243214  | -0. 444299762 | 3. 14E-22    |
| 1. 45E-06    | 0. 096126076  | 0. 046357263 | 0. 303877855  | 1. 23E-10    |
| 0. 000784248 | 0. 234899244  | 8. 40E-07    | -0. 098633367 | 0. 040920102 |

|             |              |             |              |             |
|-------------|--------------|-------------|--------------|-------------|
| 0.002793097 | 0.066341903  | 0.169689033 | -0.200350145 | 2.85E-05    |
| 0.000686195 | -0.121892046 | 0.011416369 | 0.104429856  | 0.030378259 |
| 1.15E-05    | 0.192752123  | 5.74E-05    | -0.074759068 | 0.121648495 |
| 6.78E-07    | -0.003270443 | 0.946088038 | -0.180384228 | 0.000169553 |
| 1.85E-05    | 0.108700495  | 0.02418464  | 0.278755592  | 4.09E-09    |
| 0.428182633 | 0.065832874  | 0.172994625 | -0.239149835 | 5.23E-07    |
| 0.896396835 | 0.133588703  | 0.005528039 | 0.209554481  | 1.18E-05    |
| 8.54E-11    | 0.095271469  | 0.048343844 | 0.070649636  | 0.143580797 |
| 4.75E-11    | 0.169409485  | 0.000418302 | 0.062093199  | 0.198762834 |
| 0.036687392 | -0.064410583 | 0.182484869 | 0.109402628  | 0.023278571 |
| 0.001002224 | 0.076700382  | 0.112240318 | 0.017729992  | 0.713905809 |
| 0.988847848 | 0.070563554  | 0.144070577 | -0.294179183 | 4.95E-10    |
| 9.04E-05    | 0.105398546  | 0.028865476 | 0.260039762  | 4.47E-08    |
| 0.00288228  | -0.028397263 | 0.557027398 | 0.325682257  | 4.41E-12    |
| 0.012888422 | 0.102524297  | 0.033552912 | 0.257313933  | 6.25E-08    |
| 0.46124883  | -0.127957941 | 0.007893363 | 0.213995494  | 7.59E-06    |
| 2.02E-06    | 0.166768656  | 0.000515693 | -0.181104442 | 0.000159496 |
| 0.503915405 | 0.046205602  | 0.339142298 | -0.120085746 | 0.012705246 |
| 0.188316646 | 0.008246133  | 0.864616454 | -0.392052133 | 3.00E-17    |
| 2.96E-12    | 0.000827012  | 0.986357343 | -0.104859484 | 0.029699141 |
| 0.191224315 | 0.186673684  | 9.86E-05    | -0.186139785 | 0.000103335 |
| 0.163936983 | -0.107799592 | 0.025391712 | 0.066885912  | 0.166208693 |
| 0.046006893 | 0.011348463  | 0.814480953 | 0.190663441  | 6.93E-05    |
| 1.24E-05    | 0.151664367  | 0.00161     | 0.026520628  | 0.58339043  |
| 0.001289897 | 0.137064948  | 0.004407573 | -0.211787603 | 9.45E-06    |
| 0.001830611 | -0.107502182 | 0.025801441 | 0.111043122  | 0.021275293 |
| 0.039492484 | -0.139334609 | 0.003791249 | -0.440761772 | 7.28E-22    |
| 0.003249934 | -0.217880445 | 5.12E-06    | 0.188264994  | 8.57E-05    |
| 1.42E-09    | -0.302417529 | 1.52E-10    | -0.069082199 | 0.152700378 |
| 0.300161497 | 0.034124727  | 0.480330454 | -0.358090446 | 1.87E-14    |
| 0.004434336 | 0.232083759  | 1.14E-06    | -0.22535727  | 2.35E-06    |
| 0.05215885  | 0.224506578  | 2.58E-06    | -0.138340016 | 0.004051025 |
| 0.099966025 | 0.262595015  | 3.26E-08    | -0.177097262 | 0.000223469 |
| 0.938204872 | 0.197180818  | 3.83E-05    | -0.144262799 | 0.00271322  |
| 0.014411198 | -0.301777812 | 1.67E-10    | -0.070127718 | 0.14656998  |
| 0.652564851 | 0.047712003  | 0.323613502 | -0.150118171 | 0.001798942 |
| 1.11E-05    | 0.071680809  | 0.137812202 | -0.231709891 | 1.19E-06    |
| 0.000659065 | 0.233514677  | 9.78E-07    | -0.079276528 | 0.100649591 |
| 3.67E-08    | 0.091833248  | 0.057070044 | 0.273280659  | 8.39E-09    |
| 0.744653942 | 0.14488526   | 0.00259905  | -0.202429847 | 2.34E-05    |
| 0.000144028 | 0.273681782  | 7.97E-09    | -0.0444173   | 0.358184914 |
| 0.496802851 | -0.03356646  | 0.487545217 | -0.315847813 | 2.04E-11    |
| 1.25E-17    | -0.075513221 | 0.117923165 | -0.12174636  | 0.011515859 |
| 0.000795784 | -0.243576177 | 3.16E-07    | -0.112863702 | 0.019228894 |
| 0.001172421 | -0.183426565 | 0.000130749 | 0.157706603  | 0.001033257 |
| 7.52E-06    | -0.069816826 | 0.148372968 | 0.365987933  | 4.47E-15    |
| 0.001508249 | 0.283812929  | 2.08E-09    | 0.000299562  | 0.995058115 |
| 1.44E-06    | 0.016335752  | 0.735527578 | 0.144877908  | 0.002600373 |
| 0.050592392 | 0.176271436  | 0.000239339 | 0.357832583  | 1.96E-14    |
| 0.375985748 | -0.000913543 | 0.984930064 | -0.269460997 | 1.37E-08    |
| 1.84E-06    | 0.044773398  | 0.354340542 | 0.25776393   | 5.91E-08    |

|             |              |             |              |             |
|-------------|--------------|-------------|--------------|-------------|
| 0.465774507 | 0.139325368  | 0.003793592 | -0.170678893 | 0.00037785  |
| 0.069171572 | 0.160249563  | 0.000853271 | 0.131841154  | 0.006182927 |
| 0.091529359 | -0.031416919 | 0.515860733 | -0.175773417 | 0.000249413 |
| 0.258826312 | 0.021903874  | 0.65059151  | -0.084493408 | 0.080097057 |
| 0.37893621  | -0.068714289 | 0.154903245 | 0.313154328  | 3.08E-11    |
| 0.438778905 | 0.158521904  | 0.000972057 | -0.321318819 | 8.77E-12    |
| 0.718168971 | 0.209371941  | 1.20E-05    | -0.170314413 | 0.000389075 |
| 0.00090304  | 0.072626835  | 0.132678085 | -0.124828304 | 0.009566914 |
| 1.17E-09    | 0.152874471  | 0.00147502  | 0.39030579   | 4.25E-17    |
| 4.99E-08    | 0.337737258  | 6.22E-13    | -0.118913708 | 0.013608684 |
| 0.000848675 | 0.022455359  | 0.642398898 | -0.337840293 | 6.11E-13    |
| 0.000372475 | 0.133505866  | 0.005557614 | 0.290603318  | 8.17E-10    |
| 1.31E-05    | 0.278354414  | 4.31E-09    | -0.263232975 | 3.01E-08    |
| 0.002925704 | 0.245504562  | 2.53E-07    | -0.230838321 | 1.31E-06    |
| 0.000149593 | 0.07789854   | 0.106725302 | 0.205846164  | 1.69E-05    |
| 0.20196945  | 0.126883966  | 0.008435632 | 0.206416657  | 1.60E-05    |
| 0.664413035 | -0.091419555 | 0.05820296  | 0.155994572  | 0.001173497 |
| 1.97E-08    | 0.153584396  | 0.001400751 | 0.216516377  | 5.88E-06    |
| 0.503890836 | 0.191243226  | 6.58E-05    | 0.165545498  | 0.0005676   |
| 0.102519448 | 0.132599197  | 0.005890751 | -0.091048591 | 0.059234634 |
| 1.78E-18    | 0.180980154  | 0.000161191 | -0.207865024 | 1.39E-05    |
| 0.000152049 | 0.061938358  | 0.199887025 | 0.28033668   | 3.31E-09    |
| 0.024914021 | 0.021250378  | 0.660354235 | 0.243140699  | 3.33E-07    |
| 7.41E-08    | -0.163353338 | 0.000672936 | 0.052740177  | 0.275176216 |
| 0.019342292 | 0.07852257   | 0.103938927 | -0.069525491 | 0.150077809 |
| 1.69E-05    | 0.05013071   | 0.299661852 | 0.061578204  | 0.202519726 |
| 0.885162352 | 0.190192473  | 7.23E-05    | 0.307271115  | 7.45E-11    |
| 2.54E-09    | 0.038034603  | 0.431462656 | 0.086363758  | 0.073613552 |
| 0.492562746 | 0.036144143  | 0.454723488 | -0.210860217 | 1.04E-05    |
| 2.41E-16    | 0.095048986  | 0.048872554 | 0.239787422  | 4.87E-07    |
| 0.339943153 | 0.140528437  | 0.003499409 | -0.130101482 | 0.006903175 |
| 9.80E-15    | -0.024976886 | 0.605501974 | 0.058036518  | 0.229758888 |
| 0.000269949 | 0.088043403  | 0.06816178  | -0.317050728 | 1.70E-11    |
| 0.105350005 | 0.410247901  | 6.93E-19    | -0.135903501 | 0.00475676  |
| 0.196255711 | 0.235428784  | 7.92E-07    | 0.036186161  | 0.454198956 |
| 8.46E-12    | 0.031893124  | 0.50951531  | -0.269320522 | 1.40E-08    |
| 6.29E-16    | 0.22409024   | 2.69E-06    | -0.106270393 | 0.02755965  |
| 1.78E-09    | 0.046323924  | 0.337905607 | 0.284101118  | 2.00E-09    |
| 0.93433067  | 0.139151055  | 0.003838026 | -0.407310671 | 1.29E-18    |
| 0.059666228 | 0.047167979  | 0.329167495 | -0.246872637 | 2.16E-07    |
| 9.66E-07    | 0.048950864  | 0.311194305 | -0.482588494 | 1.81E-26    |
| 0.004856006 | -0.06619999  | 0.170605819 | -0.162940453 | 0.000694698 |
| 1.30E-09    | 0.059142519  | 0.220987301 | 0.192892385  | 5.67E-05    |
| 0.002296054 | 0.001227486  | 0.979752175 | 0.140938073  | 0.003404064 |
| 3.38E-08    | -0.077788447 | 0.107222947 | 0.101505721  | 0.035362929 |
| 9.80E-06    | 0.274618148  | 7.05E-09    | -0.074781955 | 0.121534103 |
| 0.585780875 | 0.10590955   | 0.02809382  | -0.07650458  | 0.113162493 |
| 0.183323425 | 0.387875608  | 6.89E-17    | -0.259211951 | 4.95E-08    |
| 9.60E-05    | 0.452373049  | 4.44E-23    | -0.070239478 | 0.145925939 |
| 0.004932026 | 0.007588382  | 0.875323459 | -0.125616985 | 0.009117854 |
| 0.085834848 | 0.096321438  | 0.045912881 | -0.181253673 | 0.000157484 |



|             |              |             |              |             |
|-------------|--------------|-------------|--------------|-------------|
| 0.945019489 | 0.071287548  | 0.139990821 | 0.056165525  | 0.245154039 |
| 0.007741828 | 0.400705844  | 5.14E-18    | -0.18543883  | 0.000109846 |
| 0.026187889 | 0.164398736  | 0.000620628 | -0.223337483 | 2.91E-06    |
| 0.436059123 | -0.321269969 | 8.83E-12    | -0.024130969 | 0.617774785 |
| 0.886638621 | 0.092439394  | 0.055443149 | -0.116855536 | 0.015332617 |
| 0.653011843 | 0.026236038  | 0.587438415 | 0.264967046  | 2.43E-08    |
| 0.031112725 | 0.441797878  | 5.70E-22    | 0.137745618  | 0.004213858 |
| 0.028710022 | 0.036397786  | 0.451562277 | -0.232060274 | 1.15E-06    |
| 0.119656988 | 0.003353172  | 0.944726428 | -0.242147672 | 3.73E-07    |
| 0.731324518 | -0.000698444 | 0.988478074 | -0.424191692 | 3.29E-20    |
| 0.139221296 | 0.024405032  | 0.613786719 | -0.429704653 | 9.47E-21    |
| 0.00044339  | 0.37010159   | 2.09E-15    | -0.016900264 | 0.726746875 |
| 1.60E-13    | 0.168940142  | 0.000434254 | -0.067284827 | 0.163690796 |
| 1.20E-11    | 0.00928535   | 0.847750987 | 0.291457817  | 7.25E-10    |
| 0.053374041 | 0.137588886  | 0.004257768 | -0.143141328 | 0.002930503 |
| 9.41E-09    | 0.048561434  | 0.315064001 | -0.299031804 | 2.48E-10    |
| 6.33E-06    | 0.019503261  | 0.686735378 | -0.324173024 | 5.60E-12    |
| 3.94E-05    | -0.130588069 | 0.006694513 | -0.259767051 | 4.63E-08    |
| 0.14503712  | 0.018511156  | 0.701889601 | 0.25389487   | 9.44E-08    |
| 0.050651276 | -0.009722141 | 0.840682533 | 0.184128751  | 0.000123063 |
| 2.18E-06    | 0.064902403  | 0.179160622 | -0.136374375 | 0.004612291 |
| 0.282612038 | 0.000145358  | 0.997602014 | 0.252326115  | 1.14E-07    |
| 0.522320825 | 0.226507461  | 2.08E-06    | -0.04676989  | 0.333270382 |
| 0.987455495 | 0.050220881  | 0.29879231  | 0.046886391  | 0.33206628  |
| 0.908089003 | 0.005659529  | 0.906845939 | -0.337374315 | 6.60E-13    |
| 0.146725476 | 0.193991267  | 5.13E-05    | -0.358413441 | 1.76E-14    |
| 0.001660473 | 0.092409576  | 0.05552227  | -0.125222137 | 0.009340274 |
| 0.000970382 | -0.005394709 | 0.911186372 | -0.247231376 | 2.07E-07    |
| 2.27E-11    | -0.038332175 | 0.427864904 | 0.29099378   | 7.74E-10    |
| 0.028963221 | 0.035689936  | 0.460415299 | -0.346297342 | 1.47E-13    |
| 0.126978583 | 0.079814369  | 0.098354051 | 0.454125895  | 2.88E-23    |
| 0.388778086 | -0.129144803 | 0.007330476 | -0.189533847 | 7.66E-05    |
| 0.578254975 | -0.33352173  | 1.25E-12    | 0.034547105  | 0.47491063  |
| 2.68E-11    | -0.065869702 | 0.172753864 | 0.251083094  | 1.32E-07    |
| 0.210601715 | 0.110578395  | 0.021827007 | -0.217160108 | 5.51E-06    |
| 0.618648901 | -0.341637749 | 3.24E-13    | 0.045333559  | 0.348345914 |
| 0.041593051 | -0.080636833 | 0.094924508 | 0.087875518  | 0.068691371 |
| 0.724428237 | 0.070636112  | 0.143657662 | 0.263616281  | 2.87E-08    |
| 0.000596535 | 0.045222303  | 0.349531386 | 0.047841751  | 0.322297933 |
| 0.018984997 | 0.204813161  | 1.87E-05    | 0.026921123  | 0.577715869 |
| 3.07E-07    | -0.073991393 | 0.125534159 | -0.150123857 | 0.001798211 |
| 1.55E-06    | 0.132632453  | 0.005878221 | -0.245715925 | 2.47E-07    |
| 6.95E-05    | 0.130161349  | 0.006877192 | -0.265067893 | 2.40E-08    |
| 0.311863687 | -0.206762898 | 1.55E-05    | 0.108228443  | 0.024810788 |
| 0.032526187 | 0.173063856  | 0.000311523 | -0.200944893 | 2.70E-05    |
| 0.001234213 | 0.243536254  | 3.18E-07    | -0.112564101 | 0.019553388 |
| 8.55E-05    | -0.048771544 | 0.312972278 | 0.103272775  | 0.032273736 |
| 0.001171098 | -0.010186161 | 0.833187441 | -0.239687177 | 4.92E-07    |
| 3.47E-10    | -0.053788539 | 0.26573335  | 0.068721051  | 0.154862542 |
| 0.002005824 | -0.313387599 | 2.97E-11    | -0.181073709 | 0.000159914 |
| 0.135493913 | 0.343662131  | 2.30E-13    | 0.235975465  | 7.46E-07    |

|             |              |             |              |             |
|-------------|--------------|-------------|--------------|-------------|
| 0.333915092 | 0.212782023  | 8.56E-06    | -0.306400669 | 8.47E-11    |
| 0.133799077 | 0.086713463  | 0.072450113 | -0.014640355 | 0.762102207 |
| 0.01530626  | 0.227878497  | 1.80E-06    | -0.219239112 | 4.45E-06    |
| 0.3561392   | 0.044587424  | 0.356345038 | -0.271412593 | 1.07E-08    |
| 4.29E-14    | -0.46571698  | 1.56E-24    | -0.094845006 | 0.049361533 |
| 2.63E-05    | -0.001311254 | 0.978370723 | 0.108285861  | 0.024733887 |
| 5.01E-07    | 0.258619956  | 5.33E-08    | -0.167626981 | 0.000481941 |
| 0.566411263 | -0.026285654 | 0.586731753 | -0.13150051  | 0.006318407 |
| 2.53E-07    | 0.003312328  | 0.945398646 | -0.193455527 | 5.39E-05    |
| 0.836086375 | -0.057311451 | 0.235641599 | -0.064619692 | 0.181065962 |
| 0.001182805 | 0.019064035  | 0.693429436 | -0.30468931  | 1.09E-10    |
| 0.095803998 | 0.316561713  | 1.83E-11    | -0.147768027 | 0.002125262 |
| 0.002282188 | 0.360203849  | 1.28E-14    | 0.214007105  | 7.58E-06    |
| 6.53E-08    | 0.089115612  | 0.064857902 | 0.153904652  | 0.001368385 |
| 1.36E-05    | 0.264980143  | 2.42E-08    | -0.162397251 | 0.000724322 |
| 0.01467617  | 0.104993471  | 0.029490025 | -0.166927989 | 0.000509266 |
| 0.214201264 | 0.033140772  | 0.49308552  | -0.250531863 | 1.41E-07    |
| 0.001903238 | 0.360655615  | 1.18E-14    | 0.133030349  | 0.005730159 |
| 3.67E-15    | 0.223393731  | 2.89E-06    | 0.086689591  | 0.072529055 |
| 0.588952813 | 0.038224914  | 0.429159715 | -0.145766678 | 0.002444863 |
| 2.33E-08    | 0.135972796  | 0.004735247 | -0.255986855 | 7.34E-08    |
| 0.448893197 | 0.050498505  | 0.296125665 | -0.303372509 | 1.32E-10    |
| 2.09E-10    | 0.057007045  | 0.238142741 | 0.293924814  | 5.13E-10    |
| 0.582623865 | 0.074974958  | 0.120572804 | -0.153195298 | 0.00144102  |
| 1.21E-16    | 0.007075934  | 0.883681081 | 0.096090821  | 0.046437839 |
| 0.000129583 | 0.172619397  | 0.000322995 | 0.009235415  | 0.848559871 |
| 3.45E-06    | -0.104880718 | 0.029665915 | 0.121717182  | 0.011535876 |
| 9.24E-08    | 0.046515198  | 0.335912534 | 0.301023908  | 1.86E-10    |
| 0.62175465  | 0.098460191  | 0.041277497 | -0.102924058 | 0.032864431 |
| 2.33E-06    | -0.072821889 | 0.131638107 | 0.176617373  | 0.000232567 |
| 0.009911818 | 0.084005461  | 0.081862474 | 0.15677432   | 0.001107582 |
| 0.069997786 | 0.231569295  | 1.21E-06    | -0.005088669 | 0.916205678 |
| 2.69E-06    | 0.150501023  | 0.001750355 | -0.130594517 | 0.006691786 |
| 0.134617351 | 0.066666842  | 0.167603719 | -0.009745787 | 0.840300233 |
| 0.005497612 | 0.127328142  | 0.008207458 | -0.254000795 | 9.32E-08    |
| 0.97580123  | 0.184778673  | 0.00011633  | -0.244409969 | 2.87E-07    |
| 0.168489987 | 0.05226217   | 0.279556616 | -0.249718517 | 1.55E-07    |
| 5.87E-12    | 0.159697929  | 0.000889656 | 0.010450101  | 0.828930824 |
| 1.51E-13    | -0.008434438 | 0.86155566  | -0.250843132 | 1.36E-07    |
| 6.30E-07    | 0.012218171  | 0.800551589 | -0.153310642 | 0.001428973 |
| 1.52E-10    | 0.068748548  | 0.154697106 | -0.034268678 | 0.478479555 |
| 0.470545532 | 0.048295645  | 0.31772312  | -0.084054388 | 0.081684049 |
| 0.320595477 | 0.145687841  | 0.002458306 | -0.255251437 | 8.02E-08    |
| 0.039204563 | 0.328636696  | 2.75E-12    | -0.032916877 | 0.496012933 |
| 0.162936922 | -0.07167267  | 0.137857025 | -0.035071193 | 0.468232447 |
| 7.12E-16    | -0.022038906 | 0.648581589 | 0.07857322   | 0.10371532  |
| 0.287437147 | 0.377598696  | 5.09E-16    | -0.212846053 | 8.51E-06    |
| 0.000533627 | 0.226302115  | 2.13E-06    | 0.222428945  | 3.20E-06    |
| 0.802821738 | 0.278444275  | 4.26E-09    | -0.311721162 | 3.83E-11    |
| 8.92E-09    | 0.10034238   | 0.037531121 | -0.067332944 | 0.163389036 |
| 0.406933576 | 0.090425614  | 0.061001175 | -0.33423114  | 1.11E-12    |

|              |               |              |               |              |
|--------------|---------------|--------------|---------------|--------------|
| 1. 66E-06    | 0. 374274302  | 9. 56E-16    | 0. 078442086  | 0. 104295029 |
| 2. 58E-22    | 0. 146494861  | 0. 002323825 | -0. 070563097 | 0. 14407318  |
| 0. 000135052 | 0. 074444415  | 0. 123229652 | -0. 212891898 | 8. 47E-06    |
| 0. 00104953  | 0. 169790247  | 0. 000405764 | -0. 158543648 | 0. 000970472 |
| 0. 657994177 | 0. 096033899  | 0. 046568184 | -0. 021460334 | 0. 657211274 |
| 0. 088101888 | -0. 121316573 | 0. 011813843 | -0. 216248425 | 6. 04E-06    |
| 1. 12E-08    | -0. 320031122 | 1. 07E-11    | 0. 155729434  | 0. 00119672  |
| 0. 1443726   | 0. 119062294  | 0. 013491104 | -0. 247544326 | 2. 00E-07    |
| 0. 021114466 | -0. 034831453 | 0. 471280875 | -0. 29888065  | 2. 54E-10    |
| 0. 042214889 | 0. 305865657  | 9. 17E-11    | -0. 021669125 | 0. 654091723 |
| 2. 42E-05    | 0. 209910309  | 1. 14E-05    | -0. 299326061 | 2. 38E-10    |
| 0. 224587618 | 0. 05721591   | 0. 236424607 | -0. 036341058 | 0. 452268223 |
| 0. 034578821 | -0. 099028953 | 0. 040113493 | 0. 148531202  | 0. 002013798 |
| 0. 147124546 | 0. 285339982  | 1. 69E-09    | 0. 000476786  | 0. 992134532 |
| 0. 002338595 | -0. 030240984 | 0. 531703275 | 0. 087946864  | 0. 068465899 |
| 1. 85E-07    | 0. 007518413  | 0. 876463808 | 0. 389421634  | 5. 07E-17    |
| 0. 26166773  | -0. 115091839 | 0. 016959389 | 0. 131324128  | 0. 006389598 |
| 0. 03657941  | 0. 095876512  | 0. 046930181 | -0. 24556353  | 2. 52E-07    |
| 0. 013200136 | 0. 169162709  | 0. 00042662  | 0. 326323013  | 3. 98E-12    |
| 0. 601657458 | -0. 070540749 | 0. 14420055  | 0. 105083553  | 0. 029350142 |
| 0. 00318257  | -0. 002903406 | 0. 952130801 | -0. 392316887 | 2. 84E-17    |
| 1. 49E-14    | 0. 093657275  | 0. 052290675 | 0. 217538827  | 5. 30E-06    |
| 0. 918428966 | 0. 113361157  | 0. 018700462 | -0. 014960735 | 0. 757057839 |
| 5. 63E-05    | 0. 006825378  | 0. 887772222 | -0. 442373141 | 4. 97E-22    |
| 0. 000877307 | 0. 145036825  | 0. 002571921 | 0. 008427222  | 0. 861672916 |
| 0. 186544991 | 0. 031764825  | 0. 511220869 | -0. 275673901 | 6. 14E-09    |
| 0. 117636742 | 0. 331305079  | 1. 79E-12    | -0. 181716489 | 0. 000151392 |
| 1. 08E-15    | 0. 394988673  | 1. 66E-17    | 0. 087840693  | 0. 068801646 |
| 0. 106031731 | 0. 082444786  | 0. 08772118  | 0. 22088571   | 3. 76E-06    |
| 0. 441739041 | 0. 026448358  | 0. 584417166 | 0. 120811088  | 0. 012173015 |
| 0. 001334734 | 0. 125355706  | 0. 009264499 | -0. 065914967 | 0. 1724583   |
| 0. 060261281 | -0. 043675701 | 0. 366274659 | 0. 184520535  | 0. 000118962 |
| 6. 53E-07    | 0. 125421033  | 0. 009227639 | 0. 320435951  | 1. 01E-11    |
| 0. 091299843 | 0. 175300008  | 0. 000259355 | 0. 249650668  | 1. 56E-07    |
| 0. 038658849 | -0. 022251844 | 0. 645417245 | -0. 407914084 | 1. 14E-18    |
| 0. 919375899 | 0. 154641809  | 0. 001296481 | 0. 376224303  | 6. 61E-16    |
| 0. 000854731 | 0. 143824149  | 0. 002796398 | 0. 32617784   | 4. 07E-12    |
| 1. 14E-15    | -0. 001332592 | 0. 978018827 | -0. 082461609 | 0. 087656278 |
| 0. 120284445 | 0. 117616213  | 0. 014674347 | -0. 107328713 | 0. 026043042 |
| 0. 002279269 | 0. 120818     | 0. 01216804  | 0. 213844109  | 7. 70E-06    |
| 8. 79E-07    | 0. 053405794  | 0. 269154732 | -0. 367654489 | 3. 29E-15    |
| 0. 000252491 | -0. 106079467 | 0. 027841187 | 0. 103607065  | 0. 031716014 |
| 0. 977045887 | 0. 068999495  | 0. 15319349  | 0. 048429727  | 0. 316379855 |
| 3. 37E-07    | -0. 081713443 | 0. 09058026  | 0. 228461605  | 1. 69E-06    |
| 0. 850046203 | 0. 069283081  | 0. 15150766  | -0. 295212671 | 4. 28E-10    |
| 0. 527087739 | -0. 05256217  | 0. 276801965 | -0. 381771698 | 2. 28E-16    |
| 0. 039414689 | -0. 027792817 | 0. 565455285 | 0. 048779325  | 0. 312894989 |
| 1. 41E-06    | 0. 085269322  | 0. 077353355 | 0. 308598575  | 6. 11E-11    |
| 0. 001093005 | 0. 081912627  | 0. 089794276 | -0. 002614005 | 0. 95689735  |
| 1. 46E-05    | 0. 013552034  | 0. 779311932 | -0. 060831617 | 0. 20805723  |
| 0. 000137687 | 0. 117873858  | 0. 014457085 | -0. 173737523 | 0. 000294858 |

|              |               |              |               |              |
|--------------|---------------|--------------|---------------|--------------|
| 4. 58E-07    | -0. 275207946 | 6. 53E-09    | -0. 09552924  | 0. 047737272 |
| 1. 10E-15    | 0. 046440607  | 0. 336688869 | 0. 050893994  | 0. 292354375 |
| 1. 74E-07    | 0. 062940328  | 0. 192693899 | 0. 213027719  | 8. 36E-06    |
| 0. 113060831 | 0. 034305926  | 0. 478001253 | -0. 046180489 | 0. 33940515  |
| 0. 849190098 | 0. 274178519  | 7. 47E-09    | 0. 270261761  | 1. 24E-08    |
| 0. 700984997 | 0. 034295524  | 0. 4781348   | -0. 02763257  | 0. 567699825 |
| 0. 460529872 | 0. 053788187  | 0. 26573648  | -0. 175563048 | 0. 000253786 |
| 0. 065171137 | -0. 395033862 | 1. 64E-17    | 0. 084348828  | 0. 080616909 |
| 0. 261783498 | 0. 368702147  | 2. 71E-15    | 0. 011439015  | 0. 813027841 |
| 2. 81E-15    | -0. 002633226 | 0. 956580722 | -0. 282182545 | 2. 59E-09    |
| 2. 57E-16    | 0. 089838095  | 0. 062706795 | 0. 381591378  | 2. 36E-16    |
| 0. 586279227 | -0. 048354549 | 0. 317132548 | 0. 194923987  | 4. 71E-05    |
| 1. 22E-22    | 0. 151652083  | 0. 001611426 | -0. 177272768 | 0. 000220226 |
| 0. 214729702 | 0. 132378099  | 0. 005974661 | -0. 156563706 | 0. 001125041 |
| 0. 001503421 | 0. 394761356  | 1. 74E-17    | 0. 082812928  | 0. 086309682 |
| 2. 69E-11    | 0. 14043175   | 0. 003522263 | -0. 123989512 | 0. 01006597  |
| 0. 742886593 | 0. 16284009   | 0. 000700086 | 0. 31408351   | 2. 68E-11    |
| 1. 52E-06    | 0. 120605362  | 0. 012321933 | 0. 004158011  | 0. 931488874 |
| 0. 996862999 | 0. 066700002  | 0. 167391997 | 0. 110423592  | 0. 022013521 |
| 0. 221108878 | 0. 091146996  | 0. 058959501 | 0. 408818396  | 9. 39E-19    |
| 0. 808324997 | 0. 004784771  | 0. 921193161 | -0. 336756076 | 7. 32E-13    |
| 6. 18E-06    | 0. 315196435  | 2. 26E-11    | -0. 179221955 | 0. 000187046 |
| 0. 000277583 | 0. 055384582  | 0. 251788593 | -0. 4324435   | 5. 06E-21    |
| 0. 272201714 | 0. 211804108  | 9. 44E-06    | -0. 234680059 | 8. 60E-07    |
| 1. 22E-20    | 0. 142165722  | 0. 00313227  | -0. 063572717 | 0. 188252646 |
| 0. 55115982  | 0. 047428656  | 0. 326498583 | -0. 305226223 | 1. 01E-10    |
| 0. 534191456 | -0. 095216298 | 0. 048474504 | 0. 104409869  | 0. 030410174 |
| 0. 132174097 | 0. 049612072  | 0. 304695846 | -0. 251701722 | 1. 23E-07    |
| 0. 800740729 | 0. 103839783  | 0. 031332632 | 0. 501830574  | 8. 28E-29    |
| 0. 06412987  | -0. 088878973 | 0. 06557552  | 0. 09617591   | 0. 046243566 |
| 5. 46E-07    | 0. 273578666  | 8. 07E-09    | -0. 237006566 | 6. 65E-07    |
| 0. 352305486 | 0. 154041481  | 0. 001354767 | -0. 158047638 | 0. 001007238 |
| 0. 752442358 | -0. 117921169 | 0. 014417497 | -0. 27494694  | 6. 75E-09    |
| 0. 000670316 | 0. 110812377  | 0. 021547697 | -0. 316041332 | 1. 98E-11    |
| 7. 41E-09    | 0. 064622533  | 0. 181046738 | 0. 203858393  | 2. 05E-05    |
| 0. 599993395 | 0. 085885762  | 0. 075228384 | -0. 205391437 | 1. 77E-05    |
| 7. 54E-06    | 0. 068044809  | 0. 158973342 | 0. 241315289  | 4. 09E-07    |
| 3. 07E-06    | 0. 035885546  | 0. 457959188 | 0. 012040255  | 0. 803396137 |
| 1. 25E-12    | -0. 018332244 | 0. 704635279 | -0. 19071466  | 6. 90E-05    |
| 0. 942206223 | -0. 002106013 | 0. 965267775 | -0. 330868467 | 1. 92E-12    |
| 0. 311804141 | 0. 134854046  | 0. 005093528 | -0. 189662442 | 7. 58E-05    |
| 0. 001719371 | -0. 055955293 | 0. 246927938 | 0. 064319849  | 0. 183103092 |
| 0. 002836149 | -0. 007747802 | 0. 872726226 | 0. 164853544  | 0. 00059907  |
| 0. 01788053  | 0. 167796482  | 0. 000475523 | 0. 254553163  | 8. 72E-08    |
| 0. 039199886 | 0. 134263809  | 0. 005292231 | -0. 299892313 | 2. 19E-10    |
| 9. 81E-10    | 0. 212519657  | 8. 79E-06    | -0. 101651896 | 0. 03509818  |
| 0. 005600905 | -0. 241406636 | 4. 05E-07    | 0. 031754801  | 0. 511354253 |
| 0. 144941518 | 0. 105917613  | 0. 028081786 | -0. 164112942 | 0. 000634541 |
| 0. 432267158 | 0. 308035851  | 6. 65E-11    | -0. 042275207 | 0. 381858781 |
| 0. 457550968 | 0. 520148223  | 3. 53E-31    | 0. 047713811  | 0. 323595153 |
| 0. 004126644 | 0. 036049785  | 0. 455902659 | 0. 019887765  | 0. 680895311 |

|             |              |             |              |             |
|-------------|--------------|-------------|--------------|-------------|
| 0.001420226 | 0.087313654  | 0.070488322 | 0.269102485  | 1.44E-08    |
| 0.116129363 | 0.040349358  | 0.403939311 | -0.227358916 | 1.90E-06    |
| 0.330310596 | -0.101131169 | 0.036049075 | -0.152974423 | 0.001464349 |
| 0.00013537  | 0.078643316  | 0.103406488 | 0.072029579  | 0.13590194  |
| 0.815343615 | 0.201443367  | 2.57E-05    | -0.031344706 | 0.516826527 |
| 0.526212879 | 0.494559169  | 6.61E-28    | 0.071028899  | 0.141438032 |
| 8.63E-22    | -0.051056372 | 0.290815325 | -0.112233379 | 0.019917113 |
| 0.171305965 | 0.076634458  | 0.112550139 | 0.177405976  | 0.000217793 |
| 7.59E-10    | -0.152477624 | 0.001518096 | -0.307052074 | 7.69E-11    |
| 4.72E-05    | 0.244603369  | 2.81E-07    | -0.172636255 | 0.000322553 |
| 3.98E-09    | 0.096296516  | 0.045969371 | 0.139417539  | 0.003770286 |
| 0.046846031 | 0.148177905  | 0.002064716 | -0.12721194  | 0.008266613 |
| 1.50E-08    | 0.194703624  | 4.81E-05    | -0.141328694 | 0.003315347 |
| 5.62E-05    | 0.036162376  | 0.454495841 | 0.079319459  | 0.100464808 |
| 1.21E-14    | -0.019364408 | 0.688848957 | 0.159578813  | 0.000897699 |
| 1.97E-14    | 0.058143981  | 0.228895935 | 0.166205906  | 0.000539001 |
| 0.499788474 | -0.171707999 | 0.000347762 | -0.092125518 | 0.056280717 |
| 1.75E-16    | -0.079573086 | 0.099378657 | -0.360632539 | 1.18E-14    |
| 0.170988865 | 0.18878513   | 8.19E-05    | -0.016028647 | 0.740319043 |
| 3.04E-17    | 0.041569433  | 0.38986365  | -0.21406864  | 7.53E-06    |
| 4.64E-05    | 0.034852523  | 0.47101253  | -0.063901467 | 0.185973796 |
| 0.313432532 | -0.012454098 | 0.796783614 | 0.167217654  | 0.000497772 |
| 1.07E-05    | 0.075206882  | 0.119425504 | 0.004239061  | 0.930156805 |
| 0.000343933 | -0.202111451 | 2.42E-05    | 0.152528922  | 0.001512463 |
| 1.98E-05    | 0.016207692  | 0.737524336 | 0.340993221  | 3.61E-13    |
| 2.39E-06    | 0.201365267  | 2.59E-05    | 0.051465781  | 0.286959018 |
| 0.93012771  | 0.088673845  | 0.066202847 | -0.165977274 | 0.000548747 |
| 0.179191429 | 0.002971522  | 0.951009149 | -0.155149698 | 0.00124898  |
| 0.001209164 | 0.241100209  | 4.20E-07    | 0.195323025  | 4.55E-05    |
| 0.205637594 | 0.000269913  | 0.995547232 | -0.07200333  | 0.136044995 |
| 0.02320558  | 0.156955306  | 0.001092779 | -0.01155077  | 0.811235373 |
| 0.393915032 | 0.290536466  | 8.25E-10    | -0.054966828 | 0.25538842  |
| 0.015026645 | 0.005051286  | 0.916819016 | -0.215703294 | 6.39E-06    |
| 0.218244355 | 0.068433563  | 0.156600212 | -0.316700373 | 1.79E-11    |
| 4.09E-07    | 0.086345843  | 0.073673561 | -0.058508011 | 0.225989808 |
| 2.29E-22    | -0.113773498 | 0.018272083 | -0.334754491 | 1.02E-12    |
| 1.75E-10    | 0.039785351  | 0.410547252 | 0.153881363  | 0.001370715 |
| 0.885687728 | -0.017845993 | 0.712116867 | -0.230730803 | 1.32E-06    |
| 0.011571114 | -0.002957787 | 0.951235306 | -0.327975524 | 3.06E-12    |
| 2.98E-05    | 0.306003163  | 8.99E-11    | -0.171224422 | 0.00036161  |
| 0.000207283 | 0.310275813  | 4.76E-11    | -0.006646141 | 0.890700667 |
| 0.003661038 | 0.527254132  | 3.88E-32    | 0.069364853  | 0.151024179 |
| 0.085087829 | -0.346744582 | 1.36E-13    | -0.1057619   | 0.028314942 |
| 0.38740193  | 0.029240736  | 0.545369629 | -0.327685326 | 3.20E-12    |
| 0.001306646 | 0.158118061  | 0.001001941 | 0.168007325  | 0.00046765  |
| 0.218384091 | 0.330930558  | 1.90E-12    | -0.139667205 | 0.003707805 |
| 2.98E-06    | 0.07471174   | 0.121885303 | 0.249636073  | 1.56E-07    |
| 2.98E-06    | -0.128014916 | 0.007865485 | 0.029680344  | 0.539341932 |
| 0.021437301 | 0.038838885  | 0.421778802 | -0.194553513 | 4.88E-05    |
| 2.92E-17    | -0.03132635  | 0.517072175 | 0.368317765  | 2.91E-15    |
| 0.001096382 | 0.240796046  | 4.34E-07    | -0.23142136  | 1.23E-06    |

|             |              |             |              |             |
|-------------|--------------|-------------|--------------|-------------|
| 0.362829629 | 0.008764894  | 0.856189299 | -0.086097621 | 0.074509133 |
| 4.81E-08    | 0.00268606   | 0.955710425 | 0.108922334  | 0.02389513  |
| 0.001979535 | 0.17148459   | 0.000354097 | 0.041035028  | 0.395991977 |
| 0.00088631  | -0.215281557 | 6.67E-06    | -0.183174426 | 0.000133617 |
| 1.55E-09    | -0.02594334  | 0.59161518  | 0.058156146  | 0.228798397 |
| 7.50E-10    | 0.170166703  | 0.000393712 | 0.01472549   | 0.760760764 |
| 0.005731309 | 0.037190319  | 0.441765001 | -0.127525519 | 0.008107843 |
| 0.002918264 | 0.264171207  | 2.68E-08    | 0.245254159  | 2.61E-07    |
| 0.000176327 | 0.259492732  | 4.79E-08    | 0.1461634    | 0.002378225 |
| 0.465580102 | 0.375176953  | 8.06E-16    | -0.143578783 | 0.002843931 |
| 0.026490464 | -0.021425933 | 0.657725821 | -0.458636543 | 9.38E-24    |
| 5.62E-19    | 0.038375392  | 0.427343847 | -0.087084536 | 0.071232033 |
| 0.001069009 | -0.140221561 | 0.003572415 | -0.230776    | 1.32E-06    |
| 0.706071216 | 0.325030009  | 4.89E-12    | -0.110053529 | 0.022464996 |
| 0.024864257 | 0.005319219  | 0.912424152 | -0.223245584 | 2.94E-06    |
| 5.31E-06    | -0.127177565 | 0.008284185 | -0.131440512 | 0.006342543 |
| 0.702889339 | -0.005520909 | 0.90911759  | -0.24866245  | 1.75E-07    |
| 3.39E-06    | 0.043651289  | 0.366542876 | -0.39968421  | 6.35E-18    |
| 6.65E-13    | 0.151265765  | 0.001656884 | -0.112934988 | 0.01915238  |
| 0.012195801 | 0.052451643  | 0.277814685 | -0.378987003 | 3.90E-16    |
| 0.247628426 | 0.016499779  | 0.732972606 | 0.324439456  | 5.37E-12    |
| 7.21E-06    | 0.212122145  | 9.15E-06    | 0.422299977  | 5.01E-20    |
| 2.01E-23    | -0.026066979 | 0.589849206 | 0.155832801  | 0.001187617 |
| 8.53E-05    | -0.245507523 | 2.53E-07    | -0.03160903  | 0.513295944 |
| 0.007701458 | 0.066106463  | 0.171212044 | -0.172452612 | 0.0003274   |
| 0.126200822 | 0.035369745  | 0.464451461 | -0.133734493 | 0.00547633  |
| 0.129589622 | 0.086038062  | 0.074710763 | -0.344597027 | 1.96E-13    |
| 1.42E-21    | 0.082219538  | 0.08859392  | 0.148437504  | 0.002027189 |
| 3.11E-10    | 0.020539768  | 0.671035916 | 0.163895964  | 0.000645296 |
| 9.98E-05    | 0.063447368  | 0.189126938 | -0.033188827 | 0.492458402 |
| 0.128920017 | 0.071820064  | 0.137047022 | 0.303159088  | 1.36E-10    |
| 0.045629896 | 0.203510545  | 2.12E-05    | 0.013153658  | 0.785639046 |
| 0.167148323 | -0.242286474 | 3.67E-07    | 0.015030665  | 0.755958142 |
| 0.101965768 | 0.484647171  | 1.04E-26    | 0.08388009   | 0.082321116 |
| 0.000258828 | -0.130282709 | 0.006824789 | 0.321278346  | 8.82E-12    |
| 5.62E-09    | 0.397690866  | 9.56E-18    | 0.278227504  | 4.39E-09    |
| 0.811159497 | 0.001007227  | 0.98338484  | 0.271750906  | 1.02E-08    |
| 0.563641645 | 0.031580377  | 0.513678057 | -0.345471342 | 1.69E-13    |
| 0.037953491 | 0.038846108  | 0.421692409 | -0.24226936  | 3.67E-07    |
| 0.027524611 | 0.096775206  | 0.044894495 | 0.192852014  | 5.69E-05    |
| 4.05E-21    | 0.298985735  | 2.50E-10    | -0.025656131 | 0.595726789 |
| 5.05E-06    | -0.057343369 | 0.235380422 | 0.135457214  | 0.004897439 |
| 0.689102358 | 0.147503274  | 0.002165229 | -0.32363817  | 6.09E-12    |
| 0.992973938 | -0.058031786 | 0.229796934 | -0.237287404 | 6.44E-07    |
| 1.71E-05    | -0.005403267 | 0.911046064 | 0.161901933  | 0.00075235  |
| 0.023823144 | -0.272782328 | 8.95E-09    | -0.112121278 | 0.02004173  |
| 0.006611738 | 0.048521073  | 0.315466854 | -0.153184069 | 0.001442198 |
| 2.62E-15    | -0.038550861 | 0.425232029 | 0.051413621  | 0.287448404 |
| 7.46E-07    | 0.066640748  | 0.16777047  | -0.353161608 | 4.47E-14    |
| 5.15E-10    | 0.117549105  | 0.014731405 | 0.10490014   | 0.029635555 |
| 0.613168911 | 0.122004949  | 0.011339791 | -0.124731848 | 0.009623162 |

|             |              |             |              |             |
|-------------|--------------|-------------|--------------|-------------|
| 0.000432001 | 0.122832479  | 0.010792245 | -0.157105154 | 0.001080661 |
| 2.75E-07    | -0.139651152 | 0.003711794 | 0.058364869  | 0.227129394 |
| 0.000463952 | -0.303759698 | 1.25E-10    | -0.126572479 | 0.008598999 |
| 0.863846118 | -0.108691496 | 0.024196447 | 0.243605503  | 3.15E-07    |
| 0.943387823 | 0.387508587  | 7.41E-17    | -0.118857642 | 0.013653284 |
| 0.008166196 | 0.108608148  | 0.024306047 | -0.144209666 | 0.002723174 |
| 0.009047134 | 0.152609199  | 0.001503688 | -0.238336283 | 5.73E-07    |
| 0.4527565   | 0.263301097  | 2.99E-08    | -0.204296895 | 1.96E-05    |
| 0.279493004 | -0.075631635 | 0.117346421 | 0.303985025  | 1.21E-10    |
| 0.87370611  | 0.194798387  | 4.77E-05    | -0.350834849 | 6.71E-14    |
| 0.182871185 | 0.093294995  | 0.053212432 | 0.071345542  | 0.139667891 |
| 9.99E-07    | 0.056576422  | 0.241712734 | -0.093481019 | 0.052737451 |
| 7.38E-05    | 0.028331058  | 0.557947521 | -0.377828804 | 4.87E-16    |
| 2.88E-08    | 0.059427158  | 0.218769085 | 0.226280242  | 2.13E-06    |
| 3.80E-09    | 0.043054013  | 0.373143135 | 0.100531211  | 0.037171703 |
| 5.07E-13    | -0.102426636 | 0.033722965 | 0.2840627    | 2.01E-09    |
| 0.02822364  | 0.046272883  | 0.33843873  | 0.220038048  | 4.10E-06    |
| 6.70E-05    | -0.119027522 | 0.013518539 | -0.020603783 | 0.670070902 |
| 0.264916095 | -0.062117383 | 0.19858767  | 0.052932453  | 0.273427465 |
| 0.436862507 | 0.351407036  | 6.08E-14    | 0.112564178  | 0.019553304 |
| 0.76199852  | 0.074202475  | 0.124456261 | -0.269506127 | 1.36E-08    |
| 5.49E-05    | -0.336685999 | 7.40E-13    | 0.038911218  | 0.420914144 |
| 0.317501656 | -0.126900558 | 0.008427008 | 0.360917503  | 1.13E-14    |
| 0.010535123 | -0.169893791 | 0.000402415 | 0.098534891  | 0.041123012 |
| 0.730262231 | 0.108614285  | 0.024297962 | 0.272220216  | 9.63E-09    |
| 0.274491157 | -0.279772235 | 3.57E-09    | 0.101668474  | 0.035068261 |
| 0.14076251  | 0.094326121  | 0.050623868 | -0.370170763 | 2.06E-15    |
| 1.10E-05    | 0.062712126  | 0.194315244 | 0.142310688  | 0.003101512 |
| 5.23E-06    | 0.045258143  | 0.349149222 | 0.151259232  | 0.001657662 |
| 0.315349464 | -0.009482475 | 0.844559422 | -0.313871687 | 2.76E-11    |
| 0.000130769 | -0.033629071 | 0.486733172 | -0.356364039 | 2.54E-14    |
| 0.313792693 | 0.12700854   | 0.008371075 | -0.247896316 | 1.92E-07    |
| 1.81E-05    | 0.251126485  | 1.31E-07    | 0.299208029  | 2.42E-10    |
| 0.874015312 | 0.059422774  | 0.218803129 | 0.137912539  | 0.004167543 |
| 0.001641228 | 0.225897188  | 2.22E-06    | -0.064717506 | 0.180405055 |
| 0.12843295  | 0.215513219  | 6.51E-06    | -0.098862127 | 0.040452002 |
| 1.23E-13    | -0.248284943 | 1.83E-07    | 0.115068583  | 0.016981811 |
| 0.145861316 | 0.173447649  | 0.000301924 | -0.189480566 | 7.70E-05    |
| 0.841048392 | 0.053446709  | 0.268787561 | 0.017784478  | 0.713065337 |
| 0.002081077 | 0.044324131  | 0.359195052 | -0.259056016 | 5.05E-08    |
| 0.298504681 | 0.036585331  | 0.449232853 | -0.275063869 | 6.65E-09    |
| 1.07E-08    | 0.108661226  | 0.024236202 | 0.432388587  | 5.13E-21    |
| 0.000212408 | 0.185045785  | 0.000113665 | -0.203920312 | 2.03E-05    |
| 0.001260763 | 0.135487456  | 0.004887789 | 0.031563182  | 0.513907448 |
| 0.001392022 | 0.005602294  | 0.907783789 | -0.470523718 | 4.49E-25    |
| 1.42E-06    | 0.129677944  | 0.007089519 | 0.020615998  | 0.66988682  |
| 0.443758549 | -0.023815947 | 0.622372783 | -0.313920853 | 2.74E-11    |
| 0.000327716 | 0.110544321  | 0.021867943 | 0.074828675  | 0.121300857 |
| 9.21E-11    | 0.075469623  | 0.118136069 | -0.172079039 | 0.000337472 |
| 0.733047485 | -0.020332419 | 0.674165376 | -0.084424229 | 0.080345456 |
| 0.139229041 | 0.1710513    | 0.000366692 | -0.283077497 | 2.29E-09    |

|             |              |             |              |             |
|-------------|--------------|-------------|--------------|-------------|
| 0.846782257 | -0.128926475 | 0.007431246 | -0.349551909 | 8.39E-14    |
| 3.26E-10    | 0.212808289  | 8.54E-06    | -0.260778925 | 4.09E-08    |
| 0.049197379 | 0.02689661   | 0.578062451 | -0.068429738 | 0.156623429 |
| 4.21E-09    | -0.009962988 | 0.836790396 | 0.17975678   | 0.000178796 |
| 5.63E-09    | 0.226954679  | 1.99E-06    | -0.177965554 | 0.000207848 |
| 0.035722389 | 0.033249401  | 0.491668525 | -0.084264822 | 0.080920215 |
| 0.248825419 | 0.267146294  | 1.84E-08    | 0.272549385  | 9.23E-09    |
| 0.000753684 | 0.215992166  | 6.20E-06    | -0.259628974 | 4.71E-08    |
| 6.15E-16    | 0.002257856  | 0.962765349 | -0.026765651 | 0.579915662 |
| 0.09840155  | 0.261119304  | 3.92E-08    | -0.099796148 | 0.038587438 |
| 0.058475265 | 0.436538893  | 1.96E-21    | 0.041947159  | 0.385566923 |
| 1.22E-05    | 0.011224172  | 0.816476502 | 0.121089505  | 0.011974011 |
| 0.162219397 | 0.014294695  | 0.767555922 | 0.415287964  | 2.34E-19    |
| 0.124931409 | -0.238953255 | 5.35E-07    | -0.071034264 | 0.1414079   |
| 0.000471704 | 0.045940726  | 0.341921232 | -0.221539482 | 3.51E-06    |
| 5.47E-05    | -0.03400004  | 0.481936803 | 0.287936335  | 1.18E-09    |
| 0.096297766 | 0.137139723  | 0.004385906 | -0.152216298 | 0.001547089 |
| 0.470624652 | 0.200288816  | 2.87E-05    | 0.078000201  | 0.106267392 |
| 0.190337107 | 0.181814729  | 0.000150128 | 0.323081402  | 6.65E-12    |
| 0.034396719 | 0.079209964  | 0.100936625 | -0.267511293 | 1.76E-08    |
| 0.341660364 | 0.130464768  | 0.006746846 | -0.330556213 | 2.02E-12    |
| 1.04E-05    | 0.166835733  | 0.000512979 | -0.292605143 | 6.18E-10    |
| 4.88E-10    | -0.015838521 | 0.743290437 | -0.439800163 | 9.13E-22    |
| 1.54E-07    | 0.058649843  | 0.224864659 | 0.119103982  | 0.013458277 |
| 1.26E-09    | -0.00400927  | 0.933933972 | -0.086901205 | 0.071831728 |
| 0.781554022 | 0.341371375  | 3.39E-13    | 0.049875914  | 0.302127999 |
| 0.413163784 | 0.088392474  | 0.067071346 | 0.35243104   | 5.08E-14    |
| 0.000193041 | 0.338635557  | 5.36E-13    | -0.009396783 | 0.84594652  |
| 2.11E-07    | 0.208565309  | 1.30E-05    | 0.215257752  | 6.68E-06    |
| 0.63241663  | 0.042910045  | 0.374744961 | -0.069022307 | 0.153057352 |
| 7.81E-15    | -0.081141175 | 0.092869153 | 0.362090134  | 9.10E-15    |
| 0.072418271 | 0.037284512  | 0.440608711 | -0.127481174 | 0.008130129 |
| 0.611309069 | 0.092471671  | 0.055357611 | -0.25317963  | 1.03E-07    |
| 0.102678743 | 0.086568855  | 0.072929379 | 0.21849846   | 4.81E-06    |
| 0.099191498 | 0.483457304  | 1.43E-26    | -0.121835641 | 0.011454798 |
| 1.63E-06    | 0.148861498  | 0.001967236 | -0.145909837 | 0.002420622 |
| 8.41E-07    | 0.306673168  | 8.14E-11    | 0.069040843  | 0.152946808 |
| 0.033389526 | 0.065359395  | 0.176112203 | -0.255143745 | 8.12E-08    |
| 0.099022675 | 0.119703055  | 0.01299424  | 0.340320038  | 4.04E-13    |
| 0.344781695 | 0.129529134  | 0.007156052 | -0.065356677 | 0.176130216 |
| 0.008243835 | 0.078593234  | 0.103627065 | -0.203894548 | 2.04E-05    |
| 0.272406318 | 0.302948263  | 1.41E-10    | 0.037494601  | 0.438035936 |
| 0.187137328 | 0.123888919  | 0.010127345 | -0.317839946 | 1.50E-11    |
| 0.133687259 | -0.128990836 | 0.007401412 | 0.12174647   | 0.011515784 |
| 0.35025507  | 0.139296231  | 0.003800987 | -0.27088706  | 1.14E-08    |
| 6.82E-08    | -0.001249942 | 0.979381837 | -0.175117643 | 0.000263282 |
| 7.46E-08    | -0.031107812 | 0.520001345 | 0.15053366   | 0.001746269 |
| 0.979099404 | -0.055438206 | 0.25132907  | 0.171932512  | 0.000341501 |
| 0.213656523 | 0.266636173  | 1.97E-08    | -0.062197074 | 0.198011259 |
| 0.345838081 | 0.24040377   | 4.54E-07    | -0.194924448 | 4.71E-05    |
| 6.77E-15    | 0.007358588  | 0.879069571 | 0.301262972  | 1.80E-10    |



|             |              |             |              |             |
|-------------|--------------|-------------|--------------|-------------|
| 0.720079396 | 0.098256654  | 0.041700916 | -0.125841005 | 0.008993768 |
| 0.003052198 | -0.114644293 | 0.017395462 | 0.240156182  | 4.67E-07    |
| 0.065300573 | 0.058105735  | 0.229202795 | 0.250874513  | 1.35E-07    |
| 0.686663862 | 0.020949437  | 0.66486963  | 0.417277901  | 1.52E-19    |
| 0.368354209 | 0.022331224  | 0.644239257 | -0.26241756  | 3.34E-08    |
| 0.007240717 | -0.186234784 | 0.000102481 | 0.205898739  | 1.68E-05    |
| 3.31E-10    | 0.012593886  | 0.794553297 | 0.187933853  | 8.83E-05    |
| 0.000104956 | 0.211076737  | 1.01E-05    | -0.090650472 | 0.060358605 |
| 0.155710883 | 0.083286227  | 0.084521916 | -0.154909158 | 0.001271274 |
| 0.002721709 | 0.285205757  | 1.72E-09    | -0.28445854  | 1.90E-09    |
| 0.938644986 | 0.146334373  | 0.002350021 | -0.226565492 | 2.07E-06    |
| 6.24E-10    | -0.02468552  | 0.609716905 | 0.34972919   | 8.13E-14    |
| 0.000613062 | 0.194546783  | 4.88E-05    | -0.25748751  | 6.11E-08    |
| 0.148695058 | -0.027856026 | 0.564571099 | -0.225396242 | 2.34E-06    |
| 1.80E-14    | 0.005280027  | 0.913066838 | 0.103795078  | 0.031405971 |
| 0.004684779 | 0.138476463  | 0.004014459 | -0.09127872  | 0.058592864 |
| 0.141546157 | 0.202988061  | 2.22E-05    | -0.306170314 | 8.77E-11    |
| 0.000218449 | 0.410563695  | 6.48E-19    | -0.048935879 | 0.31134263  |
| 0.184872259 | 0.050432009  | 0.296762917 | -0.371881363 | 1.50E-15    |
| 0.002259868 | 0.173944548  | 0.000289906 | 0.217222074  | 5.48E-06    |
| 0.647278374 | 0.159420344  | 0.000908502 | -0.11842382  | 0.014002758 |
| 0.596184505 | 0.311441412  | 3.99E-11    | -0.243699705 | 3.12E-07    |
| 9.87E-06    | 0.027126577  | 0.574814901 | -0.33304703  | 1.35E-12    |
| 3.59E-13    | 0.024245924  | 0.616100632 | 0.262212626  | 3.42E-08    |
| 1.94E-05    | 0.091466773  | 0.058072716 | -0.092469731 | 0.05536275  |
| 0.052467798 | -0.008816684 | 0.855348856 | 0.372290129  | 1.39E-15    |
| 0.005963499 | 0.151187086  | 0.001666285 | 0.17710055   | 0.000223408 |
| 0.827168831 | 0.035469319  | 0.463194181 | -0.050334833 | 0.297695844 |
| 0.070902566 | 0.402579632  | 3.49E-18    | 0.17456112   | 0.000275614 |
| 1.18E-05    | -0.262251857 | 3.40E-08    | -0.176834089 | 0.000228416 |
| 0.010427316 | 0.164388076  | 0.000621142 | -0.083927943 | 0.082145813 |
| 0.021087907 | 0.10600411   | 0.027952986 | -0.31607025  | 1.98E-11    |
| 0.317972939 | 0.083680916  | 0.083054017 | -0.039367286 | 0.415486368 |
| 0.220870261 | 0.073805318  | 0.126490353 | 0.100722498  | 0.036810594 |
| 3.83E-13    | 0.11489394   | 0.017151022 | 0.360577017  | 1.20E-14    |
| 0.001159524 | 0.060002681  | 0.214332764 | -0.218741676 | 4.69E-06    |
| 0.320447831 | -0.040566486 | 0.401412429 | 0.20379773   | 2.06E-05    |
| 0.849074878 | 0.11946497   | 0.013176943 | 0.292070771  | 6.66E-10    |
| 0.000910999 | -0.016964683 | 0.725747111 | 0.11959943   | 0.013073484 |
| 2.43E-07    | -0.076761347 | 0.111954397 | -0.328308025 | 2.90E-12    |
| 0.048509231 | 0.120585312  | 0.012336532 | -0.235580634 | 7.79E-07    |
| 0.001893871 | 0.014967034  | 0.75695876  | 0.184097701  | 0.000123394 |
| 0.34072763  | 0.037472711  | 0.4383036   | -0.269660893 | 1.34E-08    |
| 7.67E-05    | 0.143018706  | 0.002955196 | -0.242765393 | 3.47E-07    |
| 1.99E-07    | -0.126950065 | 0.008401323 | -0.007253984 | 0.880775711 |
| 9.55E-15    | -0.043217481 | 0.371329461 | 0.178940348  | 0.000191531 |
| 0.576244404 | 0.080048102  | 0.097369541 | -0.256290969 | 7.07E-08    |
| 0.151522645 | 0.063864554  | 0.186228655 | 0.155159203  | 0.001248107 |
| 0.004562684 | 0.03343235   | 0.489287022 | -0.071171133 | 0.140640785 |
| 5.80E-07    | 0.106672361  | 0.026974904 | -0.116568032 | 0.01558808  |
| 0.629322265 | -0.076286901 | 0.114194678 | -0.250687162 | 1.38E-07    |

|              |               |              |               |              |
|--------------|---------------|--------------|---------------|--------------|
| 3. 83E-06    | 0. 335963638  | 8. 34E-13    | 0. 111569402  | 0. 020665156 |
| 0. 259448693 | 0. 124468653  | 0. 009778139 | -0. 14354803  | 0. 00284994  |
| 3. 66E-13    | 0. 167146555  | 0. 000500571 | 0. 041487701  | 0. 39079718  |
| 0. 003685896 | 0. 302022521  | 1. 61E-10    | 0. 079004957  | 0. 101824731 |
| 1. 46E-05    | 0. 115694298  | 0. 016387486 | 0. 463023677  | 3. 10E-24    |
| 0. 003275884 | 0. 046896938  | 0. 331957413 | -0. 172304464 | 0. 000331361 |
| 9. 85E-05    | 0. 434268277  | 3. 32E-21    | 0. 182923394  | 0. 000136531 |
| 3. 16E-10    | 0. 281757537  | 2. 74E-09    | 0. 167268339  | 0. 000495786 |
| 1. 91E-07    | -0. 201365873 | 2. 59E-05    | -0. 040270394 | 0. 40486062  |
| 1. 66E-05    | -0. 045436953 | 0. 347246494 | -0. 127981756 | 0. 0078817   |
| 0. 566415629 | 0. 115113367  | 0. 016938656 | -0. 205999533 | 1. 67E-05    |
| 0. 081605929 | 0. 076144164  | 0. 114875507 | -0. 196450912 | 4. 10E-05    |
| 0. 226237639 | 0. 044992796  | 0. 351984935 | -0. 045215901 | 0. 349599678 |
| 0. 000312313 | 0. 016023328  | 0. 740402119 | -0. 17344946  | 0. 000301879 |
| 0. 000506373 | 0. 174744295  | 0. 000271497 | -0. 072170174 | 0. 135137666 |
| 3. 61E-06    | -0. 01879211  | 0. 697585767 | -0. 177730896 | 0. 000211966 |
| 0. 661380215 | 0. 0020411    | 0. 966337674 | 0. 016586101  | 0. 731629188 |
| 1. 26E-05    | 0. 404914244  | 2. 14E-18    | 0. 029970451  | 0. 535382431 |
| 0. 010436583 | 0. 008347285  | 0. 862972036 | 0. 28116925   | 2. 96E-09    |
| 0. 058629883 | 0. 039250801  | 0. 41686875  | -0. 163171624 | 0. 000682435 |
| 0. 00092795  | 0. 107891266  | 0. 025266554 | -0. 25350038  | 9. 89E-08    |
| 0. 006046562 | 0. 100232852  | 0. 03774094  | -0. 04135506  | 0. 392315062 |
| 4. 65E-13    | 0. 223852593  | 2. 76E-06    | 0. 064780152  | 0. 179982704 |
| 0. 672739665 | 0. 055937968  | 0. 247074522 | -0. 072708543 | 0. 132241667 |
| 0. 859382271 | -0. 056425779 | 0. 242970435 | 0. 117490023  | 0. 0147818   |
| 0. 561053617 | 0. 141785942  | 0. 003214167 | -0. 217817875 | 5. 15E-06    |
| 1. 63E-06    | -0. 285416624 | 1. 67E-09    | -0. 041635753 | 0. 389107155 |
| 0. 350576199 | -0. 182069548 | 0. 000146895 | 0. 417548269  | 1. 43E-19    |
| 0. 046570303 | -0. 024938586 | 0. 606055273 | -0. 022542271 | 0. 641111685 |
| 0. 765645448 | 0. 09130281   | 0. 058526018 | -0. 220044832 | 4. 10E-06    |
| 0. 990790946 | -0. 264373285 | 2. 61E-08    | -0. 018277248 | 0. 705480051 |
| 0. 019521509 | 0. 158269762  | 0. 000990617 | -0. 228970047 | 1. 60E-06    |
| 0. 9579173   | 0. 081892196  | 0. 089874645 | -0. 185207172 | 0. 000112082 |
| 2. 20E-12    | 0. 341684363  | 3. 21E-13    | -0. 146141981 | 0. 00238178  |
| 1. 91E-08    | -0. 254385458 | 8. 90E-08    | 0. 189334018  | 7. 80E-05    |
| 4. 13E-08    | -0. 006281247 | 0. 896667029 | -0. 27144761  | 1. 06E-08    |
| 0. 831465858 | -0. 133838621 | 0. 005439665 | 0. 014811252  | 0. 759410164 |
| 0. 754616528 | 0. 238675914  | 5. 52E-07    | 0. 352368961  | 5. 14E-14    |
| 1. 17E-06    | -0. 019961364 | 0. 679779603 | 0. 149071248  | 0. 001938181 |
| 4. 84E-06    | 0. 163469946  | 0. 000666906 | 0. 196025711  | 4. 26E-05    |
| 6. 25E-11    | 0. 127324992  | 0. 008209056 | 0. 359536276  | 1. 44E-14    |
| 0. 682487664 | -0. 100430559 | 0. 037362917 | -0. 234339259 | 8. 93E-07    |
| 0. 643953252 | 0. 158383553  | 0. 000982201 | -0. 034777522 | 0. 471968142 |
| 4. 03E-07    | -0. 172613281 | 0. 000323155 | -0. 262915921 | 3. 14E-08    |
| 0. 065553375 | 0. 164957516  | 0. 00059424  | -0. 005070631 | 0. 916501629 |
| 3. 46E-05    | 0. 193411285  | 5. 41E-05    | -0. 131398048 | 0. 006359676 |
| 0. 670074981 | -0. 086795568 | 0. 072179143 | -0. 03388639  | 0. 483403488 |
| 0. 069650363 | 0. 160033494  | 0. 000867356 | 0. 152363722  | 0. 001530671 |
| 5. 61E-05    | -0. 012070231 | 0. 802916692 | 0. 172632444  | 0. 000322653 |
| 0. 665481638 | 0. 049040108  | 0. 310311918 | -0. 19289378  | 5. 67E-05    |
| 9. 31E-06    | 0. 074789746  | 0. 121495182 | -0. 003585606 | 0. 940901755 |

|             |              |             |              |             |
|-------------|--------------|-------------|--------------|-------------|
| 0.021927114 | 0.306495291  | 8.35E-11    | 0.149572639  | 0.001870311 |
| 1.61E-05    | -0.029584061 | 0.540659277 | 0.187439909  | 9.22E-05    |
| 2.38E-29    | -0.078293367 | 0.104955578 | 0.209856357  | 1.14E-05    |
| 0.027731599 | 0.094228647  | 0.050863981 | 0.039646008  | 0.412189603 |
| 0.001346038 | -0.058312541 | 0.227547009 | 0.4684261    | 7.74E-25    |
| 0.801168976 | -0.111423203 | 0.020833106 | -0.230570736 | 1.35E-06    |
| 0.05313909  | 0.008079447  | 0.867327542 | -0.446057499 | 2.06E-22    |
| 0.168742248 | 0.086020206  | 0.074771303 | 0.483386447  | 1.46E-26    |
| 0.858320595 | 0.040905087  | 0.397490808 | -0.354124639 | 3.77E-14    |
| 1.02E-06    | 0.059831057  | 0.215648877 | 0.13849857   | 0.004008563 |
| 0.008043941 | 0.023057344  | 0.633505332 | 0.292819323  | 6.00E-10    |
| 6.27E-28    | 0.221113599  | 3.67E-06    | 0.016708871  | 0.729719956 |
| 0.099087879 | 0.126837059  | 0.008460055 | 0.410083488  | 7.17E-19    |
| 0.008682215 | -0.237873713 | 6.03E-07    | -0.098563724 | 0.041063514 |
| 0.7618453   | 0.127380569  | 0.008180892 | -0.250512309 | 1.41E-07    |
| 0.201561666 | 0.060914025  | 0.207440685 | -0.339221739 | 4.86E-13    |
| 0.011854607 | -0.038948398 | 0.420470112 | 0.176706     | 0.000230861 |
| 0.278028283 | 0.055827543  | 0.248010233 | -0.036381621 | 0.451763382 |
| 0.003344055 | 0.079133355  | 0.101267779 | -0.078595773 | 0.103615873 |
| 0.000471315 | -0.092633544 | 0.054930269 | -0.088588996 | 0.066463769 |
| 1.99E-05    | 0.051897734  | 0.282927824 | -0.373062545 | 1.20E-15    |
| 3.45E-08    | 0.317112245  | 1.68E-11    | 0.117060906  | 0.01515239  |
| 5.24E-07    | -0.266965949 | 1.89E-08    | -0.033544008 | 0.48783659  |
| 0.59069859  | 0.014960693  | 0.7570585   | -0.196702475 | 4.00E-05    |
| 8.04E-05    | -0.046809299 | 0.332862753 | 0.188548496  | 8.36E-05    |
| 0.109598079 | -0.042998073 | 0.373765035 | 0.250932148  | 1.34E-07    |
| 0.195979271 | 0.006210908  | 0.897817811 | -0.33817226  | 5.79E-13    |
| 0.001036301 | -0.017928791 | 0.710840938 | 0.213482166  | 7.99E-06    |
| 0.092102947 | 0.299874591  | 2.20E-10    | -0.000720295 | 0.98811764  |
| 0.273595308 | 0.106331286  | 0.027470375 | -0.268976981 | 1.46E-08    |
| 0.25071784  | -0.011885782 | 0.805867966 | -0.292701014 | 6.10E-10    |
| 4.29E-08    | -0.030072023 | 0.533999586 | -0.113797463 | 0.018247451 |
| 0.002312651 | 0.096176211  | 0.04624288  | -0.303228709 | 1.35E-10    |
| 0.032090712 | 0.146300318  | 0.002355614 | 0.174091005  | 0.00028645  |
| 0.457392194 | 0.11000546   | 0.022524224 | -0.362173302 | 8.97E-15    |
| 0.001266516 | 0.004735772  | 0.921997608 | 0.136504796  | 0.004572983 |
| 0.369531897 | -0.03659681  | 0.449090504 | -0.071198168 | 0.140489637 |
| 0.181769697 | -0.009826923 | 0.838988754 | -0.308777791 | 5.95E-11    |
| 4.66E-06    | 0.135517328  | 0.004878274 | -0.228302847 | 1.72E-06    |
| 1.03E-07    | -0.277843463 | 4.61E-09    | -0.104945157 | 0.029565283 |
| 0.533844147 | 0.045200759  | 0.349761246 | -0.305710042 | 9.38E-11    |
| 0.011938077 | -0.017774231 | 0.713223374 | -0.563113273 | 2.43E-37    |
| 0.000544339 | 0.04611074   | 0.340135876 | 0.439664545  | 9.43E-22    |
| 3.95E-06    | 0.217736402  | 5.20E-06    | -0.002251532 | 0.962869565 |
| 0.060656439 | 0.019961332  | 0.679780092 | 0.231477032  | 1.22E-06    |
| 0.000310439 | 0.198337091  | 3.44E-05    | -0.149856976 | 0.001832795 |
| 1.05E-08    | 0.334144505  | 1.12E-12    | 0.079931717  | 0.097858782 |
| 0.069440071 | 0.320889511  | 9.37E-12    | -0.025815823 | 0.593439081 |
| 3.65E-05    | 0.029661968  | 0.539593235 | 0.071329764  | 0.139755691 |
| 0.000153515 | -0.023301815 | 0.629908516 | 0.072022151  | 0.135942409 |
| 5.35E-05    | -0.194738137 | 4.79E-05    | -0.056136388 | 0.245399356 |

|              |               |              |               |              |
|--------------|---------------|--------------|---------------|--------------|
| 8. 22E-11    | 0. 138018444  | 0. 004138398 | 0. 257611133  | 6. 02E-08    |
| 6. 22E-06    | -0. 104690075 | 0. 029965358 | 0. 140138763  | 0. 003592348 |
| 1. 26E-05    | 0. 128421014  | 0. 00766931  | 0. 144141528  | 0. 002735987 |
| 0. 592919434 | 0. 103676753  | 0. 031600792 | -0. 329246791 | 2. 49E-12    |
| 0. 336349105 | 0. 012544987  | 0. 795333287 | 0. 069385219  | 0. 150903946 |
| 0. 016284499 | -0. 047589993 | 0. 32485379  | -0. 032354301 | 0. 503409163 |
| 0. 002204226 | 0. 201645143  | 2. 52E-05    | -0. 193061871 | 5. 58E-05    |
| 1. 16E-05    | 0. 124794494  | 0. 009586596 | -0. 157915094 | 0. 001017278 |
| 0. 821848567 | -0. 031527291 | 0. 514386401 | 0. 288029243  | 1. 17E-09    |
| 0. 875495455 | 0. 017757209  | 0. 713485928 | -0. 31875295  | 1. 31E-11    |
| 2. 14E-08    | -0. 205085393 | 1. 82E-05    | 0. 035003724  | 0. 469089257 |
| 0. 000594843 | 0. 106622655  | 0. 027046629 | -0. 058959265 | 0. 222423895 |
| 0. 114275352 | 0. 170077462  | 0. 000396539 | -0. 309149429 | 5. 63E-11    |
| 2. 45E-16    | 0. 129584152  | 0. 007131388 | -0. 316646026 | 1. 81E-11    |
| 0. 138260981 | 0. 07467241   | 0. 122082374 | 0. 020183014  | 0. 676423789 |
| 0. 060608632 | 0. 168750695  | 0. 000440851 | 0. 086467925  | 0. 073265417 |
| 0. 019736394 | -0. 236007055 | 7. 43E-07    | -0. 107759192 | 0. 025447038 |
| 2. 19E-07    | 0. 112964755  | 0. 019120508 | -0. 257731523 | 5. 94E-08    |
| 0. 750958482 | 0. 325533088  | 4. 51E-12    | -0. 021544275 | 0. 655956383 |
| 0. 675174265 | 0. 05350716   | 0. 268245692 | -0. 336864158 | 7. 19E-13    |
| 1. 01E-09    | 0. 083886731  | 0. 08229677  | 0. 171960093  | 0. 00034074  |
| 7. 63E-11    | 0. 162283965  | 0. 000730646 | -0. 270435616 | 1. 21E-08    |
| 0. 067252874 | -0. 004751918 | 0. 921732523 | -0. 279896551 | 3. 51E-09    |
| 3. 92E-07    | -0. 275500458 | 6. 28E-09    | -0. 036163785 | 0. 454478245 |
| 0. 588698843 | 0. 195977847  | 4. 28E-05    | -0. 15920164  | 0. 00092361  |
| 0. 172877533 | 0. 091493593  | 0. 057998844 | 0. 402877696  | 3. 28E-18    |
| 0. 27441155  | 0. 094490894  | 0. 050220122 | -0. 226943346 | 1. 99E-06    |
| 2. 40E-07    | 0. 060470163  | 0. 21077713  | 0. 158105045  | 0. 001002918 |
| 0. 656713315 | 0. 052033232  | 0. 281671214 | -0. 38342308  | 1. 65E-16    |
| 0. 001163498 | -0. 313805075 | 2. 79E-11    | -0. 049819479 | 0. 302676049 |
| 0. 001819361 | 0. 355352214  | 3. 04E-14    | -0. 264098398 | 2. 71E-08    |
| 4. 08E-09    | 0. 055104246  | 0. 254200366 | 0. 137008956  | 0. 004423861 |
| 0. 080692959 | 0. 129704368  | 0. 007077763 | -0. 148013772 | 0. 00208877  |
| 4. 72E-07    | 0. 266556246  | 1. 99E-08    | 0. 204997086  | 1. 83E-05    |
| 0. 004877273 | 0. 056063583  | 0. 246013087 | 0. 519214569  | 4. 70E-31    |
| 0. 549032667 | 0. 14630857   | 0. 002354258 | -0. 284188098 | 1. 97E-09    |
| 0. 472739409 | 0. 004951823  | 0. 918451162 | -0. 082319301 | 0. 088206524 |
| 0. 00118891  | 0. 244398357  | 2. 88E-07    | 0. 279206403  | 3. 85E-09    |
| 4. 01E-09    | 0. 158639087  | 0. 000963541 | -0. 336278561 | 7. 92E-13    |
| 1. 30E-05    | 0. 119478637  | 0. 013166394 | -0. 256858877 | 6. 60E-08    |
| 0. 000116353 | -0. 144492798 | 0. 002670513 | 0. 237514668  | 6. 28E-07    |
| 0. 625244792 | -0. 366942747 | 3. 75E-15    | -0. 086215001 | 0. 074113049 |
| 5. 61E-08    | 0. 168522902  | 0. 000448908 | 0. 399188434  | 7. 03E-18    |
| 0. 028261077 | 0. 06918676   | 0. 152078671 | -0. 302191999 | 1. 57E-10    |
| 0. 0822466   | -0. 015022357 | 0. 756088771 | 0. 144558324  | 0. 002658458 |
| 0. 005109941 | 0. 339238449  | 4. 84E-13    | 0. 087304986  | 0. 070516342 |
| 0. 250950295 | -0. 068147448 | 0. 158344167 | -0. 026595019 | 0. 582334446 |
| 4. 57E-05    | 0. 173145103  | 0. 000309468 | -0. 251144821 | 1. 31E-07    |
| 0. 000113038 | -0. 029052966 | 0. 547954357 | 0. 154812897  | 0. 001280297 |
| 7. 78E-11    | 0. 031488773  | 0. 514900677 | 0. 019798067  | 0. 682256002 |
| 0. 002327012 | -0. 176815041 | 0. 000228778 | -0. 047962974 | 0. 321071949 |

|              |               |              |               |              |
|--------------|---------------|--------------|---------------|--------------|
| 2. 93E-11    | -0. 095378555 | 0. 048091077 | -0. 055675083 | 0. 249306196 |
| 2. 90E-17    | -0. 004142024 | 0. 931751648 | 0. 321833937  | 8. 09E-12    |
| 0. 006217575 | 0. 072985821  | 0. 130768943 | -0. 135636066 | 0. 004840617 |
| 0. 017942613 | 0. 014459149  | 0. 764959769 | 0. 114769516  | 0. 017272473 |
| 0. 241594369 | 0. 287970086  | 1. 18E-09    | -0. 074977415 | 0. 120560602 |
| 0. 300247789 | 0. 211775313  | 9. 47E-06    | -0. 160468099 | 0. 000839241 |
| 5. 58E-08    | 0. 271401056  | 1. 07E-08    | -0. 217469299 | 5. 34E-06    |
| 7. 37E-15    | 0. 034495034  | 0. 475576972 | -0. 214326496 | 7. 34E-06    |
| 0. 135756209 | 0. 173525235  | 0. 000300017 | -0. 016023423 | 0. 740400627 |
| 0. 003584359 | 0. 233421985  | 9. 88E-07    | -0. 057317643 | 0. 235590919 |
| 0. 483154736 | -0. 058089302 | 0. 229334733 | 0. 336475826  | 7. 66E-13    |
| 0. 001067027 | 0. 1823346    | 0. 000143601 | -0. 243283727 | 3. 27E-07    |
| 0. 000267484 | 0. 025729384  | 0. 594676894 | 0. 076026928  | 0. 115437073 |
| 0. 200162471 | 0. 052365691  | 0. 278603978 | -0. 109163854 | 0. 023583346 |
| 0. 112542311 | 0. 071211596  | 0. 140414612 | -0. 189887087 | 7. 43E-05    |
| 0. 845822148 | 0. 025221805  | 0. 601969032 | -0. 340465796 | 3. 94E-13    |
| 0. 034817713 | 0. 001243294  | 0. 97949148  | 0. 000366224  | 0. 993958422 |
| 8. 65E-13    | 0. 183191574  | 0. 00013342  | -0. 017311719 | 0. 720369273 |
| 0. 195633816 | -0. 287629513 | 1. 23E-09    | -0. 01911977  | 0. 692578667 |
| 2. 44E-06    | -0. 404618368 | 2. 28E-18    | -0. 064985764 | 0. 178601657 |
| 0. 871509504 | 0. 014626107  | 0. 762326779 | -0. 209669191 | 1. 17E-05    |
| 2. 98E-18    | 0. 216721918  | 5. 76E-06    | 0. 110767664  | 0. 021600831 |
| 0. 001658086 | 0. 480568774  | 3. 13E-26    | -0. 078861169 | 0. 10245132  |
| 9. 42E-05    | 0. 143954182  | 0. 002771502 | 0. 051388439  | 0. 287684873 |
| 0. 245769066 | 0. 170051821  | 0. 000397354 | -0. 106651471 | 0. 027005028 |
| 7. 76E-09    | 0. 07070232   | 0. 143281665 | 0. 123173773  | 0. 010573332 |
| 1. 87E-15    | -0. 202359938 | 2. 36E-05    | 0. 283159092  | 2. 27E-09    |
| 0. 067326747 | 0. 007977011  | 0. 868994402 | -0. 273572213 | 8. 08E-09    |
| 1. 63E-14    | 0. 338562536  | 5. 42E-13    | -0. 028742581 | 0. 552240109 |
| 1. 89E-06    | 0. 070201206  | 0. 146146245 | 0. 164742478  | 0. 00060427  |
| 1. 39E-05    | 0. 088038267  | 0. 06817793  | -0. 085834277 | 0. 075404025 |
| 1. 89E-12    | 0. 077095335  | 0. 110398166 | -0. 084863211 | 0. 078779727 |
| 0. 000123024 | 0. 066692901  | 0. 16743732  | 0. 215066415  | 6. 81E-06    |
| 0. 010201923 | 0. 030586571  | 0. 527022053 | -0. 113908738 | 0. 018133461 |
| 0. 657081285 | 0. 003679903  | 0. 939350491 | 0. 282838314  | 2. 37E-09    |
| 0. 343597779 | 0. 319791166  | 1. 11E-11    | -0. 100369254 | 0. 03747979  |
| 0. 40374063  | 0. 048494593  | 0. 315731342 | -0. 065740707 | 0. 173598246 |
| 0. 262741732 | 0. 124425858  | 0. 009803546 | -0. 134944646 | 0. 00506363  |
| 1. 83E-05    | 0. 219909999  | 4. 16E-06    | 0. 28985503   | 9. 07E-10    |
| 1. 76E-24    | -0. 344205988 | 2. 10E-13    | -0. 261846062 | 3. 58E-08    |
| 5. 05E-09    | 0. 220613907  | 3. 87E-06    | 0. 023611006  | 0. 625371977 |
| 0. 092871661 | -0. 003850852 | 0. 93653884  | 0. 303724129  | 1. 26E-10    |
| 2. 90E-19    | 0. 028700441  | 0. 552823232 | 0. 263610655  | 2. 88E-08    |
| 0. 000110607 | -0. 079542701 | 0. 099508286 | -0. 352271884 | 5. 22E-14    |
| 0. 000109218 | 0. 078019218  | 0. 106181906 | -0. 025373777 | 0. 599781512 |
| 0. 032070288 | -0. 10263479  | 0. 033361399 | 0. 283202922  | 2. 25E-09    |
| 1. 72E-10    | -0. 159887371 | 0. 000877002 | -0. 018493655 | 0. 702158015 |
| 8. 43E-08    | 0. 028361641  | 0. 557522393 | 0. 215162103  | 6. 75E-06    |
| 0. 179857471 | 0. 004986674  | 0. 917879225 | -0. 091728182 | 0. 057356025 |
| 2. 16E-05    | 0. 320433593  | 1. 01E-11    | -0. 015787926 | 0. 744081811 |
| 0. 689426143 | 0. 136252648  | 0. 004649254 | -0. 226975148 | 1. 98E-06    |

|             |              |             |              |             |
|-------------|--------------|-------------|--------------|-------------|
| 0.001089148 | 0.113619368  | 0.018431195 | -0.237045651 | 6.62E-07    |
| 0.001835322 | 0.016036195  | 0.740201149 | 0.205656538  | 1.72E-05    |
| 0.042096685 | -0.013295593 | 0.783383153 | -0.230247722 | 1.40E-06    |
| 0.010852632 | 0.251148456  | 1.31E-07    | -0.042136062 | 0.383428957 |
| 8.42E-17    | -0.017094269 | 0.723737391 | -0.452010929 | 4.85E-23    |
| 0.100817899 | 0.195530435  | 4.46E-05    | 0.010717966  | 0.824616026 |
| 1.50E-06    | 0.192834517  | 5.70E-05    | 0.32989383   | 2.25E-12    |
| 0.459536658 | 0.083820008  | 0.082541646 | -0.189800789 | 7.48E-05    |
| 1.50E-06    | 0.054062695  | 0.263301069 | 0.388826599  | 5.71E-17    |
| 0.87563015  | 0.207657824  | 1.42E-05    | -0.255760689 | 7.54E-08    |
| 0.824968162 | 2.19E-05     | 0.999637985 | -0.51680197  | 9.81E-31    |
| 0.907392651 | 0.099046986  | 0.040077048 | -0.14085961  | 0.003422142 |
| 2.72E-06    | 0.228841616  | 1.62E-06    | -0.197791099 | 3.62E-05    |
| 0.209080593 | 0.086212406  | 0.074121788 | -0.142360249 | 0.00309106  |
| 0.154007786 | 0.245414063  | 2.56E-07    | 0.085154217  | 0.077755489 |
| 0.121994178 | 0.123910765  | 0.010113988 | -0.092723057 | 0.054695134 |
| 2.59E-05    | -0.005181727 | 0.914679091 | -0.219832495 | 4.19E-06    |
| 0.000544945 | 0.254640236  | 8.63E-08    | -0.157247966 | 0.001069227 |
| 0.001601594 | 0.192223653  | 6.02E-05    | -0.24247893  | 3.59E-07    |
| 0.163930002 | -0.065970747 | 0.172094588 | 0.016208334  | 0.73751432  |
| 0.013904092 | -0.125058754 | 0.00943371  | -0.248254734 | 1.84E-07    |
| 0.978208805 | 0.088359179  | 0.06717473  | -0.184303474 | 0.000121218 |
| 0.860972241 | 0.066242063  | 0.170333632 | -0.044025415 | 0.362445745 |
| 9.11E-11    | -0.036558784 | 0.449562171 | 0.037580012  | 0.436992443 |
| 2.23E-11    | 0.188210835  | 8.62E-05    | 0.230491352  | 1.36E-06    |
| 0.000152139 | -0.058388955 | 0.226937357 | -0.024924946 | 0.606252393 |
| 5.43E-13    | -0.078605496 | 0.103573027 | -0.114540568 | 0.017497916 |
| 0.001399032 | -0.068480144 | 0.156317663 | 0.109205031  | 0.023530541 |
| 0.006054527 | 0.311256445  | 4.11E-11    | -0.001694617 | 0.972049394 |
| 0.169710518 | 0.0481688    | 0.318997299 | -0.350304271 | 7.36E-14    |
| 0.639431166 | 0.024642419  | 0.610341513 | 0.298819611  | 2.56E-10    |
| 2.22E-06    | 0.008774784  | 0.856028786 | 0.114230358  | 0.017807477 |
| 0.000173519 | 0.007627664  | 0.874683362 | -0.022829841 | 0.636860293 |
| 1.58E-05    | 0.170363503  | 0.000387545 | -0.035065008 | 0.468310955 |
| 1.90E-08    | 0.133997671  | 0.005384087 | -0.101750711 | 0.034920165 |
| 6.98E-07    | -0.012973904 | 0.788498603 | 0.298421648  | 2.71E-10    |
| 0.941779737 | 0.332688052  | 1.43E-12    | -0.282154964 | 2.60E-09    |
| 0.441103053 | 0.031496795  | 0.514793543 | -0.067363555 | 0.163197281 |
| 8.76E-24    | -0.016774812 | 0.728695169 | 0.178630267  | 0.000196587 |
| 0.006463546 | 0.006053077  | 0.900400804 | -0.146453582 | 0.002330537 |
| 0.885425958 | 0.086008323  | 0.07481161  | -0.260451987 | 4.25E-08    |
| 2.38E-20    | -0.110723967 | 0.021652867 | -0.012177591 | 0.801200156 |
| 0.193073189 | 0.124255559  | 0.009905235 | 0.176401401  | 0.000236774 |
| 0.010995949 | 0.111761897  | 0.020445816 | 0.142405734  | 0.003081495 |
| 1.72E-05    | -0.084716767 | 0.07929928  | 0.256138659  | 7.20E-08    |
| 0.040040439 | -0.039509733 | 0.413799544 | -0.346074764 | 1.53E-13    |
| 7.38E-17    | 0.033752796  | 0.485130642 | 0.164743615  | 0.000604216 |
| 6.45E-08    | 0.312218912  | 3.55E-11    | 0.13614028   | 0.004683611 |
| 0.007594594 | 0.014287812  | 0.767664626 | -0.18814907  | 8.66E-05    |
| 1.22E-12    | 0.067918163  | 0.159752274 | 0.010694998  | 0.824985792 |
| 0.003914294 | 0.129166845  | 0.007320371 | -0.196462903 | 4.09E-05    |

|             |              |             |              |             |
|-------------|--------------|-------------|--------------|-------------|
| 0.003586896 | -0.049138318 | 0.309342789 | -0.305386508 | 9.84E-11    |
| 0.375840496 | 0.291254175  | 7.46E-10    | 0.027050275  | 0.575891471 |
| 7.07E-05    | -0.064381184 | 0.182685014 | 0.500659044  | 1.16E-28    |
| 4.54E-07    | 0.298283197  | 2.76E-10    | -0.107827691 | 0.025353294 |
| 0.495355855 | -0.022607818 | 0.640141605 | -0.154778241 | 0.001283561 |
| 1.55E-21    | 0.034907569  | 0.47031184  | 0.389189647  | 5.31E-17    |
| 8.53E-12    | -0.026648404 | 0.581577178 | 0.093595223  | 0.052447603 |
| 0.916686673 | -0.001045959 | 0.982746031 | -0.359023555 | 1.58E-14    |
| 3.59E-05    | 0.000391538  | 0.993540813 | -0.286950036 | 1.35E-09    |
| 0.853280658 | 0.18738324   | 9.27E-05    | 0.014637683  | 0.762144319 |
| 0.058700651 | 0.301588023  | 1.71E-10    | -0.069665423 | 0.149257103 |
| 0.103767269 | 0.139570194  | 0.00373197  | -0.268185686 | 1.62E-08    |
| 8.51E-11    | 0.050760416  | 0.293624531 | 0.246707381  | 2.20E-07    |
| 0.069132425 | 0.265836657  | 2.17E-08    | 0.209445386  | 1.19E-05    |
| 1.25E-10    | 0.140273985  | 0.003559846 | 0.30881138   | 5.92E-11    |
| 3.46E-06    | 0.056938672  | 0.238707081 | -0.273050029 | 8.65E-09    |
| 0.460886937 | -0.061158366 | 0.205620386 | 0.282625312  | 2.44E-09    |
| 0.189862159 | 0.206345968  | 1.61E-05    | 0.040910111  | 0.397432795 |
| 0.269343631 | 0.02944881   | 0.542512465 | -0.334204839 | 1.11E-12    |
| 1.18E-07    | 0.37956956   | 3.49E-16    | -0.16173567  | 0.000761981 |
| 2.43E-14    | 0.432512588  | 4.98E-21    | -0.1077133   | 0.025510012 |
| 0.690104471 | 0.011649673  | 0.809649867 | 0.371133996  | 1.73E-15    |
| 0.203372719 | 0.167950535  | 0.000469759 | -0.082982144 | 0.085667046 |
| 2.25E-06    | 0.030632637  | 0.52639965  | 0.385769593  | 1.04E-16    |
| 0.039045427 | -0.023982797 | 0.619935635 | 0.339181911  | 4.89E-13    |
| 0.005488    | -0.008028248 | 0.868160592 | -0.173825872 | 0.000292735 |
| 3.33E-05    | 0.084107194  | 0.081491828 | -0.330260705 | 2.12E-12    |
| 0.289378765 | 0.27197804   | 9.93E-09    | -0.067339053 | 0.163350753 |
| 0.010118199 | -0.099709833 | 0.038756637 | 0.203308343  | 2.16E-05    |
| 0.002375375 | 0.072931393  | 0.131057028 | 0.304221547  | 1.17E-10    |
| 0.292616223 | 0.126934347  | 0.00840947  | 0.487258724  | 5.06E-27    |
| 0.072664024 | 0.204086552  | 2.00E-05    | 0.321521158  | 8.49E-12    |
| 0.992321767 | -0.106100157 | 0.027810559 | 0.012461028  | 0.796673006 |
| 5.26E-05    | 0.056014404  | 0.246428267 | -0.254893033 | 8.37E-08    |
| 0.103133575 | 0.093797895  | 0.051936494 | -0.124180752 | 0.009950198 |
| 0.189847041 | 0.032784606  | 0.497746693 | -0.249200176 | 1.65E-07    |
| 0.63292421  | -0.009821885 | 0.83907018  | -0.402288288 | 3.70E-18    |
| 0.03598275  | 0.170734279  | 0.00037617  | 0.326224699  | 4.04E-12    |
| 0.001324642 | -0.164054994 | 0.000637397 | 0.088607244  | 0.066407584 |
| 0.091726576 | 0.415204155  | 2.38E-19    | -0.067445046 | 0.16268762  |
| 0.000128195 | 0.056423931  | 0.242985891 | -0.15568377  | 0.001200762 |
| 5.08E-13    | 0.130394109  | 0.006777001 | 0.232316388  | 1.11E-06    |
| 4.76E-07    | 0.131203373  | 0.006438751 | -0.226986101 | 1.98E-06    |
| 0.457271228 | 0.038401667  | 0.427027228 | -0.217235861 | 5.47E-06    |
| 6.42E-15    | -0.021223379 | 0.660758838 | 0.180703636  | 0.000165022 |
| 0.787612199 | 0.228762974  | 1.64E-06    | -0.138972954 | 0.003883911 |
| 0.034181153 | 0.087229815  | 0.070759724 | -0.183246983 | 0.000132785 |
| 0.053744446 | 0.015601538  | 0.746999494 | 0.184008137  | 0.000124353 |
| 0.609959526 | 0.111382983  | 0.020879517 | 0.089522913  | 0.063637872 |
| 0.017042358 | 0.209668261  | 1.17E-05    | 0.349472977  | 8.50E-14    |
| 0.064658135 | 0.097521896  | 0.043260047 | -0.167027183 | 0.000505303 |

|             |              |             |              |             |
|-------------|--------------|-------------|--------------|-------------|
| 0.022228704 | 0.115966271  | 0.016134887 | 0.098253599  | 0.041707299 |
| 0.005303793 | 0.311559784  | 3.92E-11    | -0.211107373 | 1.01E-05    |
| 0.001754195 | 0.216367974  | 5.97E-06    | 0.020452678  | 0.672349644 |
| 0.239237234 | 0.227257314  | 1.92E-06    | -0.065439098 | 0.175584504 |
| 4.51E-09    | 0.042535716  | 0.378929653 | -0.11191425  | 0.020273654 |
| 0.005296688 | 0.038678166  | 0.423703698 | -0.057540045 | 0.23377559  |
| 0.073888667 | 0.005075724  | 0.916418059 | -0.390340968 | 4.22E-17    |
| 0.00056827  | 0.012903193  | 0.789624266 | -0.002329149 | 0.961590533 |
| 0.01195045  | 0.025393135  | 0.599503123 | 0.0824714    | 0.087618521 |
| 0.835223039 | 0.008614294  | 0.858634122 | -0.409819501 | 7.59E-19    |
| 0.922329846 | 0.055063878  | 0.254548973 | 0.009106244  | 0.850652985 |
| 0.88191079  | 0.259028395  | 5.07E-08    | -0.006119528 | 0.899313159 |
| 0.000424922 | 0.054074828  | 0.263193781 | -0.236653279 | 6.91E-07    |
| 1.41E-09    | -0.023406253 | 0.628374597 | -0.262199243 | 3.43E-08    |
| 0.205472385 | 0.022703956  | 0.638719906 | -0.142723898 | 0.00301534  |
| 0.363423044 | 0.161457128  | 0.000778371 | -0.109481091 | 0.023179165 |
| 0.003455275 | 0.242323912  | 3.65E-07    | -0.070358882 | 0.145240231 |
| 6.21E-08    | 0.081245534  | 0.092448337 | 0.197430535  | 3.74E-05    |
| 0.096400924 | -0.172842686 | 0.000317183 | 0.061002127  | 0.206783002 |
| 0.034585572 | -0.104091389 | 0.0309226   | 0.018167997  | 0.707159288 |
| 3.27E-08    | 0.052747068  | 0.275113411 | 0.375355458  | 7.80E-16    |
| 3.43E-05    | -0.131671342 | 0.006250135 | -0.108391827 | 0.024592504 |
| 3.18E-07    | 0.386206089  | 9.58E-17    | -0.041929593 | 0.385766099 |
| 0.63355767  | 0.027276479  | 0.572702662 | -0.308455419 | 6.25E-11    |
| 0.015230209 | -0.173488363 | 0.000300922 | 0.029260693  | 0.545095275 |
| 2.04E-05    | 0.102979393  | 0.032770087 | -0.073547497 | 0.127824562 |
| 0.012439249 | 0.007349468  | 0.879218292 | 0.14426348   | 0.002713092 |
| 0.001444826 | 0.018413015  | 0.703395248 | -0.289763084 | 9.18E-10    |
| 4.42E-06    | -0.084859624 | 0.078792422 | -0.309091301 | 5.68E-11    |
| 0.210147157 | -0.028233101 | 0.559310291 | -0.344001471 | 2.17E-13    |
| 0.035240788 | -0.089235197 | 0.064497719 | 0.18780348   | 8.93E-05    |
| 0.004045143 | 0.164809022  | 0.000601149 | 0.218524316  | 4.79E-06    |
| 0.009001496 | 0.188936664  | 8.08E-05    | 0.080763512  | 0.094404869 |
| 0.791719719 | 0.052576344  | 0.276672278 | 0.410297722  | 6.85E-19    |
| 3.11E-12    | 0.096082297  | 0.04645734  | 0.442721082  | 4.57E-22    |
| 0.001211289 | 0.092368229  | 0.05563214  | 0.453138433  | 3.68E-23    |
| 0.736610802 | 0.023587055  | 0.625722883 | -0.434985373 | 2.81E-21    |
| 0.025974851 | 0.150624538  | 0.001734938 | 0.215315705  | 6.64E-06    |
| 8.87E-25    | 0.156142023  | 0.001160762 | -0.1139418   | 0.018099711 |
| 0.032771727 | -0.107472961 | 0.025842003 | 0.08585566   | 0.075331037 |



| MEgrey       | MEgrey      |
|--------------|-------------|
| 0.110645915  | 0.021746086 |
| -0.130324764 | 0.006806713 |
| 0.131539676  | 0.006302696 |
| 0.176564048  | 0.000233599 |
| -0.034590467 | 0.474356113 |
| -0.126390934 | 0.008695509 |
| -0.103915199 | 0.031209245 |
| -0.027827824 | 0.56496551  |
| -0.1366476   | 0.00453029  |
| -0.235904868 | 7.51E-07    |
| -0.164321226 | 0.000624373 |
| 0.366358295  | 4.18E-15    |
| -0.255283672 | 7.99E-08    |
| -0.084437819 | 0.080296609 |
| 0.129017227  | 0.00738921  |
| 0.045076634  | 0.351087402 |
| 0.245190326  | 2.63E-07    |
| -0.100288369 | 0.037634464 |
| -0.106072538 | 0.027851452 |
| -0.120978129 | 0.012053272 |
| -0.494113997 | 7.49E-28    |
| -0.037328836 | 0.440065196 |
| -0.02720924  | 0.573649658 |
| -0.092819205 | 0.054443504 |
| -0.003373082 | 0.944398759 |
| -0.18320395  | 0.000133278 |
| 0.156643271  | 0.001118416 |
| 0.115546821  | 0.0165259   |
| -0.018339668 | 0.704521274 |
| 0.117360232  | 0.01489304  |
| 0.185522934  | 0.000109045 |
| -0.080501012 | 0.095484189 |
| -0.077990091 | 0.106312861 |
| 0.014480658  | 0.7646204   |
| -0.110023702 | 0.022501732 |
| -0.137492816 | 0.004284887 |
| 0.178490574  | 0.000198905 |
| 0.068536687  | 0.15597521  |
| -0.182554765 | 0.000140918 |
| -0.229604457 | 1.50E-06    |
| 0.13114239   | 0.006463703 |
| -0.007793365 | 0.871984165 |
| -0.062661388 | 0.194677088 |
| -0.181736075 | 0.000151139 |
| 0.121179735  | 0.011910137 |
| -0.157525084 | 0.001047358 |
| -0.169620053 | 0.000411325 |
| 0.098208657  | 0.041801297 |
| -0.147045886 | 0.002235896 |
| -0.119432301 | 0.013202187 |

|               |              |
|---------------|--------------|
| 0. 111966973  | 0. 020214371 |
| -0. 087962066 | 0. 068417936 |
| -0. 156032    | 0. 001170252 |
| -0. 211606524 | 9. 63E-06    |
| -0. 053339034 | 0. 269754577 |
| -0. 007905647 | 0. 870155985 |
| 0. 026944596  | 0. 577384096 |
| 0. 146721177  | 0. 002287336 |
| -0. 149022852 | 0. 001944849 |
| -0. 22648659  | 2. 09E-06    |
| 0. 080897714  | 0. 093856848 |
| -0. 12445268  | 0. 009787615 |
| -0. 105141911 | 0. 029259826 |
| -0. 150409042 | 0. 001761917 |
| -0. 130103391 | 0. 006902345 |
| -0. 141395302 | 0. 00330043  |
| -0. 026482411 | 0. 583933268 |
| -0. 201364319 | 2. 59E-05    |
| -0. 10799853  | 0. 025120788 |
| -0. 110731409 | 0. 021643998 |
| -0. 038255031 | 0. 428795924 |
| -0. 288252083 | 1. 13E-09    |
| -0. 083420436 | 0. 084020448 |
| -0. 226534481 | 2. 08E-06    |
| -0. 093482435 | 0. 052733849 |
| -0. 115019187 | 0. 017029522 |
| -0. 038009133 | 0. 431771408 |
| -0. 26662544  | 1. 97E-08    |
| 0. 014046629  | 0. 771476924 |
| -0. 157094749 | 0. 001081498 |
| -0. 266784382 | 1. 93E-08    |
| -0. 19578694  | 4. 36E-05    |
| 0. 070939535  | 0. 141940703 |
| -0. 099283404 | 0. 039601798 |
| -0. 11106654  | 0. 021247814 |
| 0. 310979639  | 4. 28E-11    |
| 0. 032027945  | 0. 507726237 |
| 0. 032024184  | 0. 507776098 |
| 0. 046905303  | 0. 331871081 |
| 0. 154044751  | 0. 001354443 |
| -0. 057284275 | 0. 235864135 |
| -0. 096354388 | 0. 045838284 |
| -0. 066932054 | 0. 165915977 |
| -0. 106691112 | 0. 026947889 |
| -0. 055958233 | 0. 246903067 |
| -0. 210806636 | 1. 04E-05    |
| 0. 223882326  | 2. 75E-06    |
| -0. 033419118 | 0. 489459065 |
| -0. 131695996 | 0. 006240337 |
| 0. 09972614   | 0. 038724624 |
| 0. 105222121  | 0. 029136081 |

|              |             |
|--------------|-------------|
| -0.221560779 | 3.50E-06    |
| 0.061332468  | 0.204330434 |
| -0.060686869 | 0.209143378 |
| -0.135007279 | 0.005043053 |
| 0.1437612    | 0.002808523 |
| -0.054064609 | 0.263284145 |
| 0.093241237  | 0.053350356 |
| 0.44672966   | 1.75E-22    |
| 0.039452151  | 0.414480929 |
| 0.047911133  | 0.321595871 |
| 0.026497541  | 0.583718331 |
| -0.12671733  | 0.008522681 |
| 0.208883583  | 1.26E-05    |
| 0.150191925  | 0.001789487 |
| -0.230881394 | 1.30E-06    |
| -0.084266541 | 0.080913998 |
| -0.040841804 | 0.398221981 |
| -0.212719551 | 8.62E-06    |
| 0.183025658  | 0.000135336 |
| -0.063254309 | 0.190479318 |
| -0.154467279 | 0.001313184 |
| 0.180646437  | 0.000165825 |
| -0.066863786 | 0.166349195 |
| -0.071199974 | 0.140479545 |
| -0.205668846 | 1.72E-05    |
| -0.247515388 | 2.01E-07    |
| -0.049967257 | 0.301242354 |
| 0.187615508  | 9.08E-05    |
| -0.256326615 | 7.04E-08    |
| -0.142670084 | 0.003026438 |
| -0.102028042 | 0.03442465  |
| -0.055847847 | 0.247837998 |
| 0.078220772  | 0.105279215 |
| -0.248263393 | 1.84E-07    |
| -0.317840913 | 1.50E-11    |
| -0.149979915 | 0.001816789 |
| 0.11415033   | 0.017888109 |
| 0.203323573  | 2.15E-05    |
| -0.280099749 | 3.42E-09    |
| -0.231864128 | 1.17E-06    |
| 0.243762928  | 3.10E-07    |
| 0.188314478  | 8.54E-05    |
| 0.025691877  | 0.595214352 |
| -0.0113768   | 0.814026151 |
| -0.232514494 | 1.09E-06    |
| -0.022032658 | 0.648674543 |
| 0.343600986  | 2.33E-13    |
| -0.064174756 | 0.184094913 |
| 0.001568934  | 0.974121616 |
| 0.063051264  | 0.191909297 |
| -0.282110816 | 2.61E-09    |

|              |             |
|--------------|-------------|
| -0.256876249 | 6.59E-08    |
| 0.041564326  | 0.389921944 |
| -0.032863436 | 0.496713029 |
| -0.15184929  | 0.001588665 |
| -0.187883965 | 8.87E-05    |
| 0.349037007  | 9.17E-14    |
| -0.018401321 | 0.703574739 |
| -0.086450247 | 0.073324403 |
| -0.019222228 | 0.691015706 |
| 0.038015216  | 0.431697658 |
| 0.494996596  | 5.84E-28    |
| 0.090120055  | 0.061883398 |
| 0.051291348  | 0.288597817 |
| 0.303553145  | 1.29E-10    |
| -0.133771717 | 0.005463197 |
| -0.113776149 | 0.018269358 |
| 0.316072665  | 1.97E-11    |
| 0.072548528  | 0.133097376 |
| -0.081302107 | 0.092220848 |
| -0.053275945 | 0.270322276 |
| -0.211871446 | 9.38E-06    |
| 0.244283744  | 2.92E-07    |
| -0.147115024 | 0.002225081 |
| 0.146853793  | 0.002266198 |
| -0.127330893 | 0.008206062 |
| 0.051611242  | 0.285597217 |
| 0.052369824  | 0.278565987 |
| -0.12780538  | 0.007968448 |
| -0.016389777 | 0.734685731 |
| 0.178735477  | 0.000194858 |
| -0.19989954  | 2.98E-05    |
| -0.089308512 | 0.064277712 |
| -0.286378559 | 1.46E-09    |
| 0.109416842  | 0.023260536 |
| -0.079671451 | 0.098959931 |
| -0.131800052 | 0.006199135 |
| -0.134448252 | 0.005229402 |
| 0.040040713  | 0.407547521 |
| -0.101334792 | 0.035674666 |
| -0.054669916 | 0.257968517 |
| 0.096413032  | 0.045705769 |
| 0.257150732  | 6.37E-08    |
| 0.093064575  | 0.053805702 |
| 0.094033385  | 0.051347845 |
| -0.058724549 | 0.224273633 |
| -0.066475437 | 0.168829736 |
| -0.094426015 | 0.050378773 |
| -0.094550178 | 0.050075516 |
| 0.021051211  | 0.663341222 |
| -0.154704901 | 0.001290491 |
| -0.32867692  | 2.73E-12    |

|              |             |
|--------------|-------------|
| -0.0669781   | 0.16562425  |
| -0.159720086 | 0.000888167 |
| -0.172302738 | 0.000331407 |
| 0.023858715  | 0.621747691 |
| -0.009645045 | 0.841929237 |
| 0.43621678   | 2.11E-21    |
| 0.127150545  | 0.008298021 |
| 0.28782778   | 1.20E-09    |
| 0.010175578  | 0.833358206 |
| -0.139457722 | 0.003760165 |
| -0.063717439 | 0.187246938 |
| -0.029703415 | 0.539026524 |
| 0.111223847  | 0.021064031 |
| -0.258165049 | 5.63E-08    |
| -0.264087196 | 2.71E-08    |
| -0.045626267 | 0.34523916  |
| 0.027818709  | 0.565093015 |
| 0.068172821  | 0.158188922 |
| 0.506538389  | 2.10E-29    |
| 0.084435909  | 0.080303474 |
| -0.206300401 | 1.62E-05    |
| -0.086598101 | 0.072832245 |
| -0.122096893 | 0.011277765 |
| -0.081394159 | 0.091851656 |
| -0.027695599 | 0.566816479 |
| -0.117787562 | 0.014529537 |
| -0.012135541 | 0.801872361 |
| -0.017459726 | 0.718079855 |
| -0.328514414 | 2.80E-12    |
| -0.038555448 | 0.425176911 |
| -0.136813488 | 0.004481148 |
| -0.164785114 | 0.000602269 |
| -0.062163253 | 0.198255735 |
| -0.054387423 | 0.260439988 |
| -0.151832967 | 0.001590537 |
| -0.189269216 | 7.84E-05    |
| 0.035022372  | 0.46885236  |
| -0.157107636 | 0.001080461 |
| -0.038864971 | 0.421466846 |
| -0.233060311 | 1.03E-06    |
| -0.018318729 | 0.704842852 |
| 0.203625739  | 2.09E-05    |
| -0.106896938 | 0.026652881 |
| 0.025191245  | 0.602409345 |
| -0.083167976 | 0.084965756 |
| -0.234218462 | 9.05E-07    |
| -0.276373592 | 5.60E-09    |
| -0.138392912 | 0.004036814 |
| -0.03812002  | 0.43042815  |
| -0.018791277 | 0.697598504 |
| -0.003782275 | 0.937666647 |

|              |             |
|--------------|-------------|
| -0.066328036 | 0.169778451 |
| -0.010569837 | 0.827001462 |
| 0.000480199  | 0.992078227 |
| -0.106261768 | 0.027572315 |
| -0.16155535  | 0.000772555 |
| -0.063384055 | 0.189569666 |
| -0.230258042 | 1.39E-06    |
| -0.087251698 | 0.070688801 |
| -0.236864128 | 6.75E-07    |
| -0.034986005 | 0.469314415 |
| -0.017120951 | 0.723323812 |
| -0.206056677 | 1.66E-05    |
| 0.147764654  | 0.002125767 |
| 0.164245611  | 0.000628047 |
| -0.020693111 | 0.668725209 |
| -0.211576246 | 9.66E-06    |
| -0.115783901 | 0.016303886 |
| -0.120315461 | 0.012534511 |
| -0.004210046 | 0.930633657 |
| 0.356732846  | 2.38E-14    |
| -0.106261015 | 0.027573422 |
| -0.036285286 | 0.452962858 |
| -0.09570338  | 0.047331112 |
| -0.000952125 | 0.98429368  |
| -0.072548185 | 0.13309921  |
| -0.124476064 | 0.009773745 |
| -0.16277802  | 0.000703437 |
| 0.152496196  | 0.001516054 |
| -0.219751845 | 4.23E-06    |
| -0.206041511 | 1.66E-05    |
| -0.005321512 | 0.912386544 |
| -0.049807227 | 0.302795112 |
| -0.023301851 | 0.629907985 |
| -0.14595094  | 0.002413703 |
| -0.304884593 | 1.06E-10    |
| 0.022142313  | 0.647044133 |
| -0.150911379 | 0.001699615 |
| -0.107067638 | 0.026410331 |
| -0.104315453 | 0.030561323 |
| 0.034878972  | 0.470675787 |
| -0.03494445  | 0.469842704 |
| -0.16328398  | 0.000676547 |
| -0.000231727 | 0.99617718  |
| 0.177362987  | 0.000218576 |
| -0.148515503 | 0.002016036 |
| -0.238104318 | 5.88E-07    |
| 0.004566817  | 0.924772061 |
| 0.041060645  | 0.395696896 |
| -0.170148927 | 0.000394274 |
| -0.083969094 | 0.081995302 |
| 0.053239785  | 0.270648024 |

|              |             |
|--------------|-------------|
| -0.251590677 | 1.24E-07    |
| -0.038130217 | 0.43030475  |
| -0.135746794 | 0.004805736 |
| 0.016782697  | 0.728572661 |
| -0.209853049 | 1.14E-05    |
| 0.019352911  | 0.689024081 |
| -0.142102631 | 0.003145742 |
| -0.202453668 | 2.34E-05    |
| -0.129903989 | 0.006989513 |
| -0.074950583 | 0.12069388  |
| -0.188652001 | 8.29E-05    |
| -0.019206664 | 0.691253045 |
| 0.192184965  | 6.04E-05    |
| 0.131445847  | 0.006340394 |
| 0.05089653   | 0.292330295 |
| -0.190678479 | 6.92E-05    |
| -0.092054007 | 0.056473005 |
| 0.013741321  | 0.776310701 |
| -0.068033209 | 0.15904457  |
| -0.187032891 | 9.56E-05    |
| 0.19797358   | 3.56E-05    |
| -0.373782459 | 1.05E-15    |
| -0.049204476 | 0.308691078 |
| 0.162259407  | 0.000732024 |
| -0.03479602  | 0.471732357 |
| 0.031361421  | 0.516602895 |
| -0.146851787 | 0.002266516 |
| -0.10325208  | 0.032308536 |
| 0.317806498  | 1.51E-11    |
| -0.057123534 | 0.23718341  |
| -0.096741362 | 0.044969789 |
| 0.022801395  | 0.637280316 |
| -0.038224507 | 0.429164634 |
| -0.310821747 | 4.38E-11    |
| 0.106130875  | 0.02776514  |
| -0.19108565  | 6.67E-05    |
| -0.142266024 | 0.003110959 |
| -0.146572942 | 0.002311176 |
| -0.14206041  | 0.003154788 |
| -0.283065801 | 2.30E-09    |
| -0.200826545 | 2.73E-05    |
| -0.065550226 | 0.17485071  |
| -0.263831851 | 2.80E-08    |
| 0.215300208  | 6.65E-06    |
| 0.001904486  | 0.968589538 |
| -0.154899683 | 0.001272159 |
| -0.138072607 | 0.004123563 |
| -0.092013553 | 0.056582022 |
| -0.251236327 | 1.30E-07    |
| -0.097457636 | 0.043398707 |
| -0.083494083 | 0.083746288 |

|              |             |
|--------------|-------------|
| -0.096340627 | 0.045869424 |
| 0.00559242   | 0.90794561  |
| -0.165500692 | 0.00056959  |
| -0.210397474 | 1.08E-05    |
| 0.151729868  | 0.001602413 |
| 0.057439014  | 0.234599014 |
| -0.1522891   | 0.001538961 |
| 0.007056589  | 0.883996842 |
| -0.141478547 | 0.003281874 |
| -0.240960098 | 4.26E-07    |
| -0.06371488  | 0.187264686 |
| -0.228856796 | 1.62E-06    |
| -0.094584568 | 0.049991794 |
| -0.041477301 | 0.390916065 |
| 0.291427628  | 7.28E-10    |
| -0.130644172 | 0.006670821 |
| -0.109549601 | 0.023092672 |
| -0.278603573 | 4.17E-09    |
| 0.154751142  | 0.001286117 |
| 0.082009279  | 0.089414862 |
| -0.180106497 | 0.000173588 |
| -0.167303795 | 0.000494401 |
| -0.251385007 | 1.27E-07    |
| 0.042766706  | 0.376344005 |
| -0.336370135 | 7.80E-13    |
| -0.132907258 | 0.0057756   |
| -0.280421414 | 3.28E-09    |
| 0.030937443  | 0.522290787 |
| -0.035481016 | 0.463046614 |
| -0.015382278 | 0.750436362 |
| -0.136218008 | 0.004659821 |
| 0.16625744   | 0.000536827 |
| -0.072189234 | 0.135034312 |
| 0.12210894   | 0.011269661 |
| 0.10232171   | 0.033906483 |
| -0.09313207  | 0.053631353 |
| 0.113596855  | 0.018454537 |
| -0.131188108 | 0.006444989 |
| -0.206585744 | 1.57E-05    |
| -0.008933271 | 0.853457509 |
| -0.048587505 | 0.314803962 |
| 0.113298967  | 0.018765824 |
| -0.016339072 | 0.735475833 |
| -0.058710152 | 0.224387446 |
| 9.31E-05     | 0.998463624 |
| -0.009495911 | 0.844341978 |
| 0.013188563  | 0.785084112 |
| -0.149592503 | 0.001867667 |
| -0.257080663 | 6.42E-08    |
| -0.241272807 | 4.11E-07    |
| -0.035806668 | 0.458948708 |



|              |             |
|--------------|-------------|
| -0.052691546 | 0.275619717 |
| -0.09146889  | 0.058066884 |
| -0.041725132 | 0.38808903  |
| -0.10110316  | 0.036100837 |
| -0.279689593 | 3.61E-09    |
| -0.073345865 | 0.128875576 |
| -0.101730067 | 0.034957292 |
| 0.166442749  | 0.000529075 |
| -0.054384303 | 0.260467372 |
| -0.26264743  | 3.24E-08    |
| 0.045863037  | 0.34273905  |
| -0.095309539 | 0.048253856 |
| -0.161024788 | 0.000804459 |
| -0.237207123 | 6.50E-07    |
| 0.099438035  | 0.039293543 |
| -0.02049152  | 0.671763599 |
| -0.108713929 | 0.024167022 |
| -0.17038595  | 0.000386848 |
| -0.26229306  | 3.39E-08    |
| 0.047631676  | 0.324429719 |
| -0.103766659 | 0.031452668 |
| -0.231635699 | 1.20E-06    |
| 0.216378776  | 5.97E-06    |
| -0.112910155 | 0.019179004 |
| -0.153347186 | 0.001425176 |
| -0.070818082 | 0.142626064 |
| 0.055473938  | 0.251023198 |
| -0.109919221 | 0.022630824 |
| -0.057741068 | 0.232143282 |
| -0.214778266 | 7.01E-06    |
| -0.001287234 | 0.978766837 |
| -0.254944315 | 8.32E-08    |
| -0.18642885  | 0.000100757 |
| 0.17104733   | 0.000366809 |
| 0.063455699  | 0.189068736 |
| 0.134343562  | 0.005264981 |
| -0.094514801 | 0.050161765 |
| 0.154747633  | 0.001286449 |
| -0.080574293 | 0.095181892 |
| -0.039715014 | 0.411375784 |
| -0.132023615 | 0.006111436 |
| 0.019289957  | 0.689983242 |
| -0.106545316 | 0.027158553 |
| 0.091215343  | 0.058769029 |
| -0.253608346 | 9.77E-08    |
| 0.064600745  | 0.181194188 |
| -0.054131921 | 0.262689336 |
| -0.195539692 | 4.46E-05    |
| -0.00366115  | 0.939658981 |
| -0.09685203  | 0.044723972 |
| 0.012524697  | 0.795657003 |

|              |             |
|--------------|-------------|
| -0.305290225 | 9.98E-11    |
| 0.078507985  | 0.104003385 |
| 0.012630047  | 0.793976613 |
| 0.010020436  | 0.835862609 |
| -0.074841338 | 0.121237696 |
| -0.155678316 | 0.001201246 |
| -0.041812012 | 0.387100935 |
| 0.016277255  | 0.73643947  |
| 0.019619313  | 0.684970726 |
| -0.363668166 | 6.84E-15    |
| -0.362008881 | 9.24E-15    |
| -0.271985021 | 9.93E-09    |
| -0.04801577  | 0.320538954 |
| -0.030970586 | 0.521844999 |
| -0.178023296 | 0.000206846 |
| -0.098346883 | 0.041512762 |
| -0.037521787 | 0.437703646 |
| 0.050928665  | 0.292025303 |
| -0.12524851  | 0.009325269 |
| -0.072841789 | 0.131532361 |
| -0.081756407 | 0.090410256 |
| -0.06020326  | 0.212801931 |
| -0.18802505  | 8.76E-05    |
| -0.109429683 | 0.023244253 |
| 0.017921541  | 0.710952625 |
| -0.122291614 | 0.011147395 |
| -0.128671555 | 0.007550471 |
| 0.131838115  | 0.006184124 |
| -0.2801363   | 3.40E-09    |
| -0.046956031 | 0.331347853 |
| 0.068948361  | 0.153498971 |
| 0.110021157  | 0.022504869 |
| 0.058931536  | 0.222641849 |
| -0.22698309  | 1.98E-06    |
| 0.124804538  | 0.009580746 |
| 0.250214295  | 1.46E-07    |
| -0.136622239 | 0.004537846 |
| -0.093662801 | 0.052276717 |
| -0.138132848 | 0.00410712  |
| -0.087255864 | 0.070675306 |
| -0.025403326 | 0.5993566   |
| 0.047556973  | 0.325189986 |
| -0.016061988 | 0.739798356 |
| -0.027256564 | 0.572983066 |
| -0.12483682  | 0.009561962 |
| -0.117785215 | 0.014531512 |
| -0.273720944 | 7.93E-09    |
| -0.130582099 | 0.006697038 |
| -0.030749898 | 0.524816997 |
| 0.023204698  | 0.631336317 |
| 0.290365362  | 8.45E-10    |

|              |             |
|--------------|-------------|
| -0.175144168 | 0.000262707 |
| -0.02545488  | 0.598615566 |
| -0.134533195 | 0.005200693 |
| -0.082200192 | 0.088669202 |
| 0.055839983  | 0.247904695 |
| -0.248472443 | 1.79E-07    |
| 0.144462825  | 0.002676043 |
| -0.101911921 | 0.034631392 |
| 0.239289742  | 5.15E-07    |
| -0.076994629 | 0.110865607 |
| 0.273067241  | 8.63E-09    |
| -0.064591258 | 0.181258421 |
| -0.065206779 | 0.177125933 |
| -0.093623796 | 0.052375295 |
| 0.05809233   | 0.229310421 |
| 0.13608904   | 0.004699354 |
| -0.119723991 | 0.012978282 |
| -0.159690037 | 0.000890187 |
| -0.102404121 | 0.033762272 |
| -0.205626006 | 1.73E-05    |
| -0.228969587 | 1.60E-06    |
| 0.110840674  | 0.021514129 |
| -0.077784171 | 0.107242313 |
| -0.025610308 | 0.596383981 |
| -0.219615794 | 4.29E-06    |
| -0.221754312 | 3.43E-06    |
| 0.125069103  | 0.009427767 |
| -0.05435197  | 0.260751312 |
| -0.07583918  | 0.116340879 |
| -0.141911368 | 0.003186907 |
| -0.001603168 | 0.973557161 |
| -0.191859586 | 6.22E-05    |
| 0.077768975  | 0.107311155 |
| -0.171154459 | 0.000363656 |
| -0.141689045 | 0.003235371 |
| 0.111500191  | 0.020744516 |
| 0.114041546  | 0.017998224 |
| -0.022575603 | 0.640618307 |
| 0.398971815  | 7.35E-18    |
| -0.126863533 | 0.008446264 |
| -0.068401769 | 0.156793282 |
| -0.134066158 | 0.005360313 |
| 0.012323543  | 0.798868125 |
| -0.156515236 | 0.001129095 |
| -0.004797202 | 0.920989083 |
| -0.164741462 | 0.000604317 |
| -0.202032273 | 2.43E-05    |
| -0.068356359 | 0.157069353 |
| -0.084964706 | 0.078421265 |
| -0.191857361 | 6.22E-05    |
| 0.102049616  | 0.034386355 |

|              |             |
|--------------|-------------|
| -0.205942324 | 1.68E-05    |
| -0.251634591 | 1.24E-07    |
| 0.020353158  | 0.673852106 |
| 0.093993083  | 0.051448189 |
| 0.014472599  | 0.764747546 |
| 0.174526905  | 0.00027639  |
| 0.005491922  | 0.909592717 |
| -0.262892263 | 3.14E-08    |
| -0.287038002 | 1.34E-09    |
| -0.121042822 | 0.012007177 |
| -0.02402534  | 0.619314873 |
| 0.169167112  | 0.00042647  |
| -0.065166179 | 0.177396335 |
| -0.152726729 | 0.001490924 |
| -0.13016094  | 0.006877369 |
| -0.008372103 | 0.862568656 |
| -0.056918308 | 0.238875342 |
| -0.228967277 | 1.60E-06    |
| -0.076494468 | 0.113210284 |
| -0.229476796 | 1.52E-06    |
| 0.336256359  | 7.95E-13    |
| 0.22726883   | 1.92E-06    |
| 0.038106039  | 0.430597377 |
| 0.236461494  | 7.06E-07    |
| -0.122512527 | 0.011001105 |
| 0.043403894  | 0.369267881 |
| -0.158999499 | 0.000937779 |
| 0.089677244  | 0.063180551 |
| -0.132464382 | 0.005941789 |
| 0.268395845  | 1.57E-08    |
| -0.168680879 | 0.000443306 |
| -0.013147745 | 0.78573307  |
| -0.004588765 | 0.924411602 |
| -0.030294591 | 0.530975751 |
| -0.111330053 | 0.020940732 |
| 0.162505402  | 0.000718333 |
| 0.142270757  | 0.003109957 |
| 0.493115945  | 9.92E-28    |
| -0.022083126 | 0.64792394  |
| 0.190118387  | 7.27E-05    |
| 0.18933311   | 7.80E-05    |
| -0.375975168 | 6.93E-16    |
| -0.195441291 | 4.50E-05    |
| -0.069513174 | 0.150150214 |
| 0.071436469  | 0.139162732 |
| -0.061535697 | 0.202832104 |
| -0.237648419 | 6.19E-07    |
| 0.162919368  | 0.000695827 |
| -0.127999404 | 0.007873066 |
| -0.09253685  | 0.055185209 |
| -0.184518883 | 0.000118979 |

|              |             |
|--------------|-------------|
| -0.111952744 | 0.020230356 |
| -0.102524199 | 0.033553084 |
| -0.258960772 | 5.11E-08    |
| -0.027097034 | 0.575231625 |
| -0.143858418 | 0.002789817 |
| -0.143971209 | 0.002768257 |
| 0.297531909  | 3.08E-10    |
| -0.190211621 | 7.21E-05    |
| -0.372454977 | 1.35E-15    |
| -0.154392324 | 0.001320418 |
| -0.131439218 | 0.006343065 |
| 0.322340195  | 7.47E-12    |
| 0.259914314  | 4.54E-08    |
| 0.144771265  | 0.002619625 |
| -0.173154074 | 0.000309241 |
| -0.088099109 | 0.067986795 |
| -0.052457611 | 0.277759937 |
| 0.030363764  | 0.530037723 |
| 0.013479179  | 0.780467959 |
| -0.112920372 | 0.019168046 |
| 0.020951974  | 0.664831511 |
| 0.114343516  | 0.017694006 |
| -0.146283075 | 0.002358451 |
| -0.201530955 | 2.55E-05    |
| 0.217019711  | 5.59E-06    |
| -0.234141453 | 9.13E-07    |
| 0.179768475  | 0.00017862  |
| -0.072757657 | 0.131979875 |
| -0.181555962 | 0.000153479 |
| -0.198486709 | 3.39E-05    |
| 0.181114238  | 0.000159363 |
| -0.148854931 | 0.001968152 |
| -0.030343816 | 0.530308145 |
| 0.070609364  | 0.143809774 |
| -0.205945592 | 1.67E-05    |
| 0.15639196   | 0.001139466 |
| 0.194544517  | 4.88E-05    |
| -0.10121525  | 0.035894069 |
| -0.248275355 | 1.84E-07    |
| 0.042661152  | 0.377524208 |
| -0.236123029 | 7.33E-07    |
| -0.149394649 | 0.001894151 |
| -0.164091559 | 0.000635593 |
| -0.091209432 | 0.058785483 |
| 0.103450211  | 0.031976672 |
| 0.320087909  | 1.06E-11    |
| -0.115571352 | 0.016502806 |
| -0.106824116 | 0.026756936 |
| -0.007482889 | 0.877042861 |
| -0.210364455 | 1.09E-05    |
| -0.136590083 | 0.004547442 |

|              |             |
|--------------|-------------|
| 0.003130256  | 0.948395684 |
| -0.210017466 | 1.13E-05    |
| -0.088432283 | 0.066947902 |
| -0.117510259 | 0.014764522 |
| 0.524092526  | 1.04E-31    |
| 0.086558583  | 0.072963522 |
| -0.253048529 | 1.04E-07    |
| -0.181180213 | 0.000158471 |
| -0.112232082 | 0.019918551 |
| -0.30947447  | 5.36E-11    |
| -0.265822152 | 2.18E-08    |
| -0.121908932 | 0.011404887 |
| -0.108345053 | 0.024654825 |
| 0.070590387  | 0.143917768 |
| 0.045462005  | 0.346980436 |
| -0.039754469 | 0.410910908 |
| -0.176920806 | 0.000226775 |
| -0.146282499 | 0.002358546 |
| -0.019766639 | 0.682733014 |
| -0.144739568 | 0.002625373 |
| -0.188726981 | 8.23E-05    |
| -0.046909345 | 0.331829373 |
| -0.00651024  | 0.892922075 |
| 0.025196714  | 0.602330535 |
| -0.250153687 | 1.47E-07    |
| 0.06851334   | 0.156116545 |
| -0.020547139 | 0.670924776 |
| 0.024350469  | 0.6145798   |
| -0.104815338 | 0.029768318 |
| -0.029614771 | 0.540238926 |
| -0.173786154 | 0.000293688 |
| -0.198296716 | 3.46E-05    |
| 0.121317265  | 0.011813358 |
| -0.010351278 | 0.830523987 |
| -0.166128959 | 0.000542263 |
| -0.232391389 | 1.11E-06    |
| -0.050562307 | 0.295515072 |
| -0.029051411 | 0.547975786 |
| 0.052074544  | 0.281288834 |
| -0.215718596 | 6.38E-06    |
| -0.079388531 | 0.100168079 |
| 0.212200818  | 9.07E-06    |
| -0.208823105 | 1.27E-05    |
| 0.299838624  | 2.21E-10    |
| 0.462048962  | 3.97E-24    |
| -0.012685298 | 0.793095721 |
| -0.14893574  | 0.001956906 |
| 0.129399863  | 0.007214301 |
| 0.071603605  | 0.138237836 |
| 0.069197911  | 0.152012484 |
| -0.117641388 | 0.014652992 |

|              |             |
|--------------|-------------|
| 0.108318264  | 0.02469058  |
| -0.133880286 | 0.005425056 |
| 0.275682542  | 6.13E-09    |
| -0.207819796 | 1.40E-05    |
| -0.192154264 | 6.06E-05    |
| -0.148855337 | 0.001968095 |
| -0.114195589 | 0.017842469 |
| -0.237755129 | 6.12E-07    |
| -0.222045006 | 3.33E-06    |
| 0.028165068  | 0.560257706 |
| -0.304427865 | 1.13E-10    |
| -0.457519445 | 1.24E-23    |
| -0.170594491 | 0.000380422 |
| -0.076028417 | 0.11542993  |
| 0.010499887  | 0.828128469 |
| -0.037024432 | 0.443805595 |
| -0.028997815 | 0.548714673 |
| 0.37997207   | 3.23E-16    |
| -0.023208655 | 0.631278127 |
| -0.176158495 | 0.00024159  |
| -0.154027495 | 0.001356154 |
| 0.054759187  | 0.257190889 |
| -0.097231905 | 0.043888763 |
| 0.030839743  | 0.523606012 |
| -0.124134098 | 0.009978332 |
| 0.106696606  | 0.026939978 |
| -0.195828165 | 4.34E-05    |
| -0.125225171 | 0.009338546 |
| 0.089458764  | 0.063828761 |
| 0.15502113   | 0.001260851 |
| -0.173833208 | 0.000292559 |
| -0.163550583 | 0.000662765 |
| 0.07781035   | 0.107123795 |
| 0.159014547  | 0.000936717 |
| -0.175962818 | 0.000245536 |
| -0.204326112 | 1.96E-05    |
| -0.002901361 | 0.952164484 |
| 0.04477292   | 0.354345682 |
| -0.120134991 | 0.012668473 |
| -0.344387996 | 2.03E-13    |
| -0.080285717 | 0.096376745 |
| 0.171389334  | 0.000356831 |
| -0.056194081 | 0.244913779 |
| -0.051378225 | 0.287780828 |
| -0.065172963 | 0.177351133 |
| 0.098843819  | 0.040489297 |
| -0.18593798  | 0.000105171 |
| 0.085964864  | 0.074959178 |
| 0.112622743  | 0.019489501 |
| 0.068753341  | 0.154668287 |
| -0.148794823 | 0.001976555 |

|              |             |
|--------------|-------------|
| -0.003964694 | 0.934666865 |
| -0.024174105 | 0.617146344 |
| -0.26118692  | 3.88E-08    |
| -0.112148077 | 0.020011878 |
| 0.232102839  | 1.14E-06    |
| 0.003273089  | 0.946044479 |
| 0.059062867  | 0.22161091  |
| -0.340788957 | 3.74E-13    |
| -0.295246897 | 4.26E-10    |
| 0.038319023  | 0.428023541 |
| 0.019533497  | 0.686275445 |
| 0.296521135  | 3.55E-10    |
| -0.357140483 | 2.21E-14    |
| -0.015753764 | 0.744616309 |
| -0.023869673 | 0.62158756  |
| -0.005813761 | 0.904319325 |
| 0.445238217  | 2.51E-22    |
| -0.179556759 | 0.000181841 |
| 0.104366214  | 0.03047998  |
| -0.091458012 | 0.058096865 |
| -0.016907514 | 0.726634319 |
| 0.061294048  | 0.204614587 |
| -0.10665087  | 0.027005894 |
| 0.022231845  | 0.645714169 |
| -0.171318266 | 0.000358883 |
| 0.036240025  | 0.453527039 |
| -0.18511827  | 0.000112951 |
| 0.081523629  | 0.091334389 |
| -0.12929809  | 0.007260458 |
| 0.059753523  | 0.216245358 |
| -0.132297196 | 0.006005633 |
| 0.026055196  | 0.590017405 |
| -0.094993142 | 0.049006018 |
| 0.388164261  | 6.51E-17    |
| -0.130436913 | 0.00675872  |
| -0.152961377 | 0.001465738 |
| 0.024486707  | 0.612600411 |
| -0.188321242 | 8.53E-05    |
| -0.039164717 | 0.417892086 |
| -0.078133409 | 0.105669736 |
| -0.088984029 | 0.065256131 |
| -0.106830687 | 0.026747533 |
| -0.157344064 | 0.001061596 |
| -0.220019979 | 4.11E-06    |
| -0.09154877  | 0.057847117 |
| -0.048788316 | 0.312805703 |
| 0.130051026  | 0.006925141 |
| -0.058448616 | 0.226462171 |
| 0.1626255    | 0.000711735 |
| 0.214613133  | 7.13E-06    |
| 0.014683837  | 0.761416981 |



|              |             |
|--------------|-------------|
| -0.171292486 | 0.000359631 |
| -0.09418887  | 0.05096224  |
| -0.117372278 | 0.014882685 |
| -0.223847958 | 2.76E-06    |
| -0.049229671 | 0.308443118 |
| 0.479208423  | 4.51E-26    |
| 0.42798954   | 1.40E-20    |
| 0.514006999  | 2.28E-30    |
| -0.07611091  | 0.115034577 |
| 0.231012766  | 1.28E-06    |
| 0.117930597  | 0.014409621 |
| -0.135963065 | 0.004738262 |
| -0.140754221 | 0.003446561 |
| -0.000859168 | 0.985826942 |
| -0.078970891 | 0.101972907 |
| 0.116168745  | 0.015949057 |
| -0.38344007  | 1.65E-16    |
| -0.248709761 | 1.74E-07    |
| -0.013783302 | 0.77564553  |
| -0.166294323 | 0.000535275 |
| -0.204825952 | 1.87E-05    |
| -0.194166728 | 5.05E-05    |
| 0.253376055  | 1.00E-07    |
| -0.107100983 | 0.026363173 |
| -0.013899032 | 0.773812664 |
| -0.014279647 | 0.767793596 |
| -0.133963152 | 0.005396106 |
| -0.215109819 | 6.78E-06    |
| -0.227509511 | 1.87E-06    |
| -0.118605385 | 0.013855548 |
| -0.003452111 | 0.943098242 |
| -0.085951869 | 0.075003351 |
| 0.16465697   | 0.000608301 |
| -0.058600793 | 0.225253324 |
| 0.020157332  | 0.676812294 |
| -0.172134115 | 0.00033597  |
| -0.111281174 | 0.020997399 |
| -0.232771937 | 1.06E-06    |
| 0.122620819  | 0.010930016 |
| -0.176226272 | 0.000240237 |
| -0.033067811 | 0.494038464 |
| -0.124982495 | 0.009477605 |
| 0.29238119   | 6.37E-10    |
| -0.107568933 | 0.025708989 |
| -0.077392655 | 0.109027163 |
| -0.032836322 | 0.497068438 |
| -0.052053036 | 0.281487862 |
| -0.322517419 | 7.26E-12    |
| -0.209574922 | 1.18E-05    |
| -0.067952834 | 0.159538747 |
| -0.103113324 | 0.032542697 |

|              |             |
|--------------|-------------|
| -0.207580458 | 1.43E-05    |
| -0.201417616 | 2.58E-05    |
| 0.056090235  | 0.245788295 |
| 0.127551845  | 0.008094639 |
| -0.067627874 | 0.161548538 |
| 0.417373541  | 1.49E-19    |
| -0.133873488 | 0.005427437 |
| -0.059992008 | 0.21441444  |
| -0.094764583 | 0.049555445 |
| -0.083980916 | 0.081952104 |
| 0.028313448  | 0.558192399 |
| -0.095544167 | 0.047702342 |
| -0.03505607  | 0.468424422 |
| -0.080607449 | 0.09504537  |
| -0.061167036 | 0.205556009 |
| 0.156783689  | 0.001106811 |
| -0.035205773 | 0.466525972 |
| -0.10661849  | 0.027052646 |
| -0.102578576 | 0.033458716 |
| -0.100395103 | 0.037430473 |
| -0.20607684  | 1.65E-05    |
| 0.026199228  | 0.587962939 |
| 0.006249369  | 0.897188546 |
| 0.036311959  | 0.452630574 |
| 0.280670903  | 3.17E-09    |
| 0.245611567  | 2.50E-07    |
| -0.061168875 | 0.205542352 |
| -0.05256295  | 0.276794824 |
| -0.034891768 | 0.47051292  |
| -0.135149496 | 0.004996611 |
| 0.139095605  | 0.003852259 |
| -0.066158253 | 0.170876152 |
| 0.033014269  | 0.494738402 |
| -0.032730217 | 0.498460536 |
| -0.022667286 | 0.639262024 |
| 0.00949516   | 0.844354131 |
| -0.044545318 | 0.356799862 |
| -0.06546211  | 0.175432366 |
| -0.143980493 | 0.002766489 |
| -0.148646746 | 0.001997396 |
| 0.042006449  | 0.384895102 |
| -0.161402233 | 0.00078164  |
| 0.013298738  | 0.783333193 |
| -0.202463097 | 2.34E-05    |
| 0.112528361  | 0.019592414 |
| 0.074893895  | 0.120975833 |
| -0.005903641 | 0.902847359 |
| 0.162008795  | 0.00074622  |
| 0.215627786  | 6.44E-06    |
| -0.039941442 | 0.408712105 |
| -0.183154536 | 0.000133845 |

|              |             |
|--------------|-------------|
| -0.05626627  | 0.244307137 |
| 0.00399609   | 0.934150674 |
| -0.059817751 | 0.215751157 |
| -0.137594885 | 0.00425608  |
| -0.053369206 | 0.26948336  |
| -0.177323711 | 0.000219293 |
| -0.185861193 | 0.000105878 |
| -0.178852549 | 0.00019295  |
| -0.049893841 | 0.301954048 |
| -0.106384744 | 0.027392205 |
| -0.155601933 | 0.001208038 |
| -0.168755618 | 0.000440679 |
| -0.137796786 | 0.004199611 |
| -0.157003076 | 0.001088902 |
| -0.113038736 | 0.019041496 |
| -0.118703553 | 0.013776524 |
| 0.552930847  | 8.47E-36    |
| -0.13361285  | 0.005519444 |
| -0.14793309  | 0.002100687 |
| 0.081653688  | 0.090817124 |
| -0.106349662 | 0.027443482 |
| -0.125737663 | 0.009050822 |
| -0.288743651 | 1.06E-09    |
| -0.096856651 | 0.044713732 |
| 0.0251491    | 0.603016826 |
| 0.071933249  | 0.136427502 |
| -0.211425641 | 9.80E-06    |
| 0.154996199  | 0.001263165 |
| -0.091251515 | 0.058668431 |
| -0.03607636  | 0.455570388 |
| 0.077128284  | 0.110245566 |
| -0.43250242  | 4.99E-21    |
| 0.153956709  | 0.001363189 |
| -0.123625538 | 0.010289617 |
| -0.176642459 | 0.000232083 |
| -0.062947904 | 0.192640238 |
| -0.092226205 | 0.056010902 |
| -0.084124503 | 0.0814289   |
| 0.013124125  | 0.786108671 |
| -0.154521274 | 0.001307995 |
| 0.007352703  | 0.879165542 |
| 0.047178351  | 0.329061029 |
| -0.035444386 | 0.463508816 |
| -0.318877129 | 1.28E-11    |
| -0.048739014 | 0.313295527 |
| -0.152886784 | 0.001473702 |
| 0.098320979  | 0.041566706 |
| 0.031590759  | 0.51353959  |
| -0.12388413  | 0.010130275 |
| -0.051134245 | 0.290079161 |
| -0.261685759 | 3.65E-08    |

|              |             |
|--------------|-------------|
| 0.386861171  | 8.42E-17    |
| -0.132407017 | 0.005963626 |
| 0.425706171  | 2.34E-20    |
| -0.142864503 | 0.002986518 |
| -0.306366876 | 8.52E-11    |
| 0.016685479  | 0.73008361  |
| -0.13952698  | 0.003742781 |
| -0.116615709 | 0.015545461 |
| 0.146377741  | 0.002342916 |
| -0.122750444 | 0.010845459 |
| -0.069549244 | 0.149938255 |
| -0.127562936 | 0.008089081 |
| -0.153949723 | 0.001363885 |
| 0.324727708  | 5.13E-12    |
| -0.245243975 | 2.61E-07    |
| 0.147838279  | 0.002114771 |
| -0.154415971 | 0.001318132 |
| -0.01167332  | 0.809270906 |
| 0.018628812  | 0.700086108 |
| 0.154589214  | 0.001301494 |
| -0.163479498 | 0.000666414 |
| 0.134018037  | 0.005377008 |
| 0.254974104  | 8.29E-08    |
| -0.135537583 | 0.004871831 |
| -0.131663349 | 0.006253314 |
| -0.056391496 | 0.243257296 |
| -0.286078689 | 1.52E-09    |
| -0.194044277 | 5.11E-05    |
| -0.1370562   | 0.004410114 |
| -0.066337921 | 0.169714707 |
| -0.199610366 | 3.06E-05    |
| -0.107826451 | 0.025354988 |
| -0.113360251 | 0.018701412 |
| -0.149427286 | 0.001889759 |
| -0.23105575  | 1.28E-06    |
| -0.305452239 | 9.75E-11    |
| -0.275845621 | 6.00E-09    |
| -0.041919707 | 0.385878215 |
| -0.017673788 | 0.714773125 |
| 0.170707476  | 0.000376982 |
| -0.060817079 | 0.208166137 |
| 0.108226121  | 0.024813903 |
| 0.164171463  | 0.000631669 |
| 0.177992285  | 0.000207384 |
| 0.378395315  | 4.37E-16    |
| 0.251463379  | 1.26E-07    |
| -0.106628399 | 0.027038331 |
| -0.263874344 | 2.78E-08    |
| 0.055671956  | 0.24933282  |
| -0.072707627 | 0.132246557 |
| -0.019059741 | 0.693495001 |

|              |             |
|--------------|-------------|
| -0.036607885 | 0.44895318  |
| -0.105609131 | 0.028545301 |
| -0.24389976  | 3.05E-07    |
| -0.076644859 | 0.112501214 |
| 0.183841147  | 0.000126158 |
| -0.113459812 | 0.018597181 |
| 0.398154093  | 8.70E-18    |
| -0.073096612 | 0.130184052 |
| -0.027893785 | 0.564043234 |
| -0.090966329 | 0.059465447 |
| -0.192974872 | 5.63E-05    |
| -0.118068673 | 0.014294686 |
| 0.097408966  | 0.043503978 |
| -0.19880687  | 3.29E-05    |
| 0.013198168  | 0.784931414 |
| -0.022304372 | 0.644637643 |
| -0.23443773  | 8.84E-07    |
| 0.123395165  | 0.01043344  |
| 0.217096854  | 5.55E-06    |
| -0.154382863 | 0.001321334 |
| -0.127143312 | 0.008301728 |
| -0.392175575 | 2.93E-17    |
| -0.232017312 | 1.15E-06    |
| -0.15028792  | 0.001777249 |
| 0.088185945  | 0.067714761 |
| -0.081153729 | 0.092818449 |
| -0.141683582 | 0.003236571 |
| -0.06663559  | 0.167803444 |
| -0.085129686 | 0.07784141  |
| 0.211673318  | 9.56E-06    |
| -0.164869648 | 0.00059832  |
| -0.249644663 | 1.56E-07    |
| -0.194509879 | 4.90E-05    |
| -0.152185039 | 0.00155059  |
| -0.131284012 | 0.00640589  |
| 0.275367878  | 6.39E-09    |
| -0.047197931 | 0.328860115 |
| -0.236052085 | 7.39E-07    |
| 0.230896687  | 1.30E-06    |
| -0.137020268 | 0.004420566 |
| -0.062631517 | 0.19489034  |
| -0.045658854 | 0.344894386 |
| -0.032870378 | 0.496622054 |
| -0.031463374 | 0.515239925 |
| -0.055157037 | 0.253744976 |
| 0.179690874  | 0.000179794 |
| 0.284333997  | 1.93E-09    |
| 0.135054539  | 0.005027577 |
| -0.107498162 | 0.025807018 |
| -0.209051994 | 1.24E-05    |
| -0.150769208 | 0.001717039 |

|              |             |
|--------------|-------------|
| -0.040242878 | 0.405181953 |
| -0.043446945 | 0.368792787 |
| -0.295040397 | 4.38E-10    |
| -0.140687153 | 0.003462183 |
| -0.192515279 | 5.87E-05    |
| -0.016005357 | 0.740682819 |
| 0.09291477   | 0.054194354 |
| 0.045075381  | 0.351100806 |
| -0.157009471 | 0.001088384 |
| -0.200967741 | 2.69E-05    |
| -0.243987289 | 3.02E-07    |
| 0.074536573  | 0.122764902 |
| -0.056910314 | 0.238941416 |
| -0.007530993 | 0.876258761 |
| -0.100589182 | 0.037061951 |
| -0.19022149  | 7.21E-05    |
| 0.141009463  | 0.003387691 |
| -0.185333443 | 0.000110858 |
| -0.289357844 | 9.71E-10    |
| 0.127885709  | 0.007928834 |
| 0.035810005  | 0.458906832 |
| -0.127326513 | 0.008208285 |
| -0.031557581 | 0.51398217  |
| 0.059888117  | 0.215210665 |
| -0.138321736 | 0.004055947 |
| 0.284411165  | 1.91E-09    |
| 0.215635537  | 6.43E-06    |
| 0.223801749  | 2.77E-06    |
| -0.071689075 | 0.137766692 |
| 0.016096406  | 0.739260985 |
| -0.116995681 | 0.015209427 |
| -0.143001178 | 0.002958742 |
| -0.080617715 | 0.095003129 |
| -0.242650214 | 3.52E-07    |
| -0.021259929 | 0.660211137 |
| 0.156557001  | 0.001125601 |
| 0.138510876  | 0.004005284 |
| 0.130765453  | 0.006619862 |
| -0.032534422 | 0.501034798 |
| -0.069207878 | 0.151953338 |
| 0.001605131  | 0.973524803 |
| -0.296836477 | 3.40E-10    |
| -0.144780361 | 0.002617978 |
| 0.012446038  | 0.796912259 |
| -0.012150075 | 0.801639997 |
| -0.124933035 | 0.009506172 |
| -0.011770633 | 0.807711821 |
| 0.140620197  | 0.003477843 |
| -0.024774924 | 0.608422192 |
| 0.097534998  | 0.043231821 |
| -0.245982469 | 2.40E-07    |

|              |             |
|--------------|-------------|
| -0.060090152 | 0.213664208 |
| -0.028584634 | 0.554427294 |
| -0.085321286 | 0.077172366 |
| -0.003309853 | 0.94543939  |
| -0.351965116 | 5.51E-14    |
| -0.250987334 | 1.33E-07    |
| 0.173072669  | 0.000311299 |
| -0.125262471 | 0.009317334 |
| -0.290375897 | 8.43E-10    |
| -0.008205212 | 0.865281881 |
| 0.130761868  | 0.006621364 |
| -0.149365371 | 0.001898099 |
| -0.24733632  | 2.05E-07    |
| -0.168610243 | 0.000445803 |
| -0.074662187 | 0.122133635 |
| -0.09996108  | 0.038265867 |
| -0.147674695 | 0.002139274 |
| -0.275943627 | 5.93E-09    |
| -0.234555028 | 8.72E-07    |
| -0.025276902 | 0.60117553  |
| 0.008215282  | 0.865118114 |
| 0.152271343  | 0.00154094  |
| 0.03979713   | 0.410408593 |
| -0.04797389  | 0.320961708 |
| 0.08315833   | 0.085002046 |
| -0.005742643 | 0.905484263 |
| -0.225970542 | 2.21E-06    |
| -0.007812968 | 0.871664952 |
| -0.135839829 | 0.004776605 |
| 0.00159666   | 0.973664468 |
| -0.114936659 | 0.017109497 |
| -0.102229309 | 0.0340688   |
| -0.135770441 | 0.004798317 |
| -0.146914063 | 0.002256651 |
| -0.147697173 | 0.002135892 |
| -0.272755515 | 8.98E-09    |
| 0.085455746  | 0.07670564  |
| 0.263038764  | 3.09E-08    |
| -0.12399752  | 0.010061098 |
| -0.178690666 | 0.000195592 |
| 0.061339297  | 0.204279956 |
| -0.102322696 | 0.033904755 |
| -0.246936756 | 2.15E-07    |
| -0.234507529 | 8.77E-07    |
| -0.081745784 | 0.090452265 |
| -0.033858954 | 0.483757921 |
| -0.056619951 | 0.241350169 |
| -0.26684153  | 1.92E-08    |
| -0.303011757 | 1.39E-10    |
| -0.140868171 | 0.003420166 |
| -0.048537175 | 0.315306096 |

|              |             |
|--------------|-------------|
| 0.18092044   | 0.000162011 |
| 0.127974482  | 0.007885261 |
| 0.289344442  | 9.73E-10    |
| -0.137761483 | 0.004209436 |
| -0.25218638  | 1.16E-07    |
| -0.112119615 | 0.020043584 |
| 0.09965705   | 0.038860416 |
| -0.077981132 | 0.106353164 |
| -0.154373703 | 0.001322221 |
| -0.040199577 | 0.405687939 |
| -0.125123076 | 0.009396827 |
| -0.081705638 | 0.090611171 |
| -0.025378919 | 0.599707559 |
| -0.141048588 | 0.003378748 |
| -0.102711724 | 0.033228603 |
| -0.067289897 | 0.16365898  |
| -0.136524158 | 0.004567173 |
| 0.00437949   | 0.927849273 |
| 0.037712105  | 0.435381448 |
| -0.218797223 | 4.66E-06    |
| -0.104495975 | 0.030272885 |
| -0.257662157 | 5.99E-08    |
| -0.249323308 | 1.62E-07    |
| -0.067630797 | 0.161530377 |
| -0.123482321 | 0.01037882  |
| 0.231220899  | 1.26E-06    |
| -0.134348402 | 0.005263331 |
| -0.072857372 | 0.131449598 |
| -0.234956372 | 8.35E-07    |
| -0.17275459  | 0.000319464 |
| -0.135525714 | 0.004875605 |
| -0.109778609 | 0.022805569 |
| -0.26284809  | 3.16E-08    |
| -0.088771183 | 0.065904553 |
| 0.122710887  | 0.010871201 |
| -0.10125374  | 0.035823301 |
| -0.207783429 | 1.40E-05    |
| -0.222662117 | 3.12E-06    |
| -0.034183128 | 0.479579076 |
| -0.20079039  | 2.74E-05    |
| 0.046133594  | 0.339896335 |
| -0.071116158 | 0.140948521 |
| -0.092122303 | 0.056289352 |
| -0.19600221  | 4.27E-05    |
| -0.059905844 | 0.215074657 |
| 0.160902361  | 0.000811992 |
| 0.225750437  | 2.26E-06    |
| -0.223433577 | 2.88E-06    |
| -0.03202537  | 0.507760384 |
| 0.471895934  | 3.14E-25    |
| -0.206850324 | 1.53E-05    |



|              |             |
|--------------|-------------|
| -0.131063473 | 0.006496121 |
| -0.239092085 | 5.26E-07    |
| -0.131532833 | 0.006305438 |
| -0.241320712 | 4.09E-07    |
| -0.073600105 | 0.127551439 |
| -0.154022832 | 0.001356616 |
| -0.127133466 | 0.008306777 |
| -0.145361398 | 0.002514692 |
| -0.322053549 | 7.81E-12    |
| 0.061633753  | 0.202112032 |
| -0.188105144 | 8.70E-05    |
| 0.023524627  | 0.626637937 |
| -0.067202751 | 0.164206496 |
| -0.026434068 | 0.584620283 |
| 0.159408008  | 0.000909348 |
| 0.200345771  | 2.85E-05    |
| -0.005507364 | 0.909339607 |
| -0.11033518  | 0.022120662 |
| -0.242554434 | 3.56E-07    |
| -0.08703055  | 0.071408202 |
| -0.48505881  | 9.25E-27    |
| 0.124631747  | 0.009681845 |
| 0.113411044  | 0.018648173 |
| 0.114008522  | 0.01803177  |
| -0.027954682 | 0.563192393 |
| -0.019413541 | 0.688100794 |
| -0.215326977 | 6.64E-06    |
| -0.068483544 | 0.156297057 |
| -0.289605081 | 9.39E-10    |
| -0.140475327 | 0.003511946 |
| -0.140586207 | 0.003485817 |
| 0.160086352  | 0.00086389  |
| -0.103737424 | 0.031500769 |
| 0.179469348  | 0.000183186 |
| 0.204213638  | 1.98E-05    |
| -0.072470392 | 0.133516769 |
| 0.056113898  | 0.245588829 |
| -0.224582354 | 2.55E-06    |
| 0.033226611  | 0.491965634 |
| -0.173029087 | 0.000312407 |
| -0.194630895 | 4.84E-05    |
| 0.04291435   | 0.37469701  |
| -0.123662477 | 0.010266721 |
| 0.0158847    | 0.742568372 |
| 0.201503115  | 2.56E-05    |
| -0.243673488 | 3.13E-07    |
| -0.031528822 | 0.514365968 |
| -0.113799364 | 0.0182455   |
| 0.179058721  | 0.000189634 |
| -0.156019032 | 0.001171375 |
| -0.115299534 | 0.016760287 |

|              |             |
|--------------|-------------|
| -0.242697312 | 3.50E-07    |
| 0.035168145  | 0.467002749 |
| 0.330759208  | 1.95E-12    |
| -0.155965235 | 0.001176046 |
| 0.31797577   | 1.47E-11    |
| -0.139591279 | 0.003726706 |
| -0.214918503 | 6.91E-06    |
| 0.173196958  | 0.000308162 |
| 0.10506063   | 0.029385685 |
| 0.074993643  | 0.120480051 |
| 0.005142915  | 0.91531575  |
| -0.277276602 | 4.97E-09    |
| -0.148738737 | 0.001984425 |
| 0.00531231   | 0.912537442 |
| -0.083267674 | 0.084591429 |
| -0.281064767 | 3.01E-09    |
| -0.175175454 | 0.000262031 |
| 0.001685676  | 0.972196801 |
| -0.158521771 | 0.000972067 |
| -0.197821184 | 3.61E-05    |
| 0.117149317  | 0.015075378 |
| -0.007876313 | 0.870633536 |
| -0.234761129 | 8.53E-07    |
| 0.164087233  | 0.000635806 |
| -0.081572831 | 0.091138429 |
| 0.283938453  | 2.04E-09    |
| 0.038547867  | 0.42526802  |
| 0.013507404  | 0.780020052 |
| -0.041596653 | 0.389553054 |
| -0.265648682 | 2.23E-08    |
| -0.145162387 | 0.002549643 |
| -0.230170476 | 1.41E-06    |
| -0.119365261 | 0.013254127 |
| -0.026228849 | 0.587540835 |
| -0.146412095 | 0.002337301 |
| -0.125842341 | 0.008993033 |
| 0.151170111  | 0.001668319 |
| -0.125615371 | 0.009118753 |
| -0.214329732 | 7.34E-06    |
| -0.126843834 | 0.008456524 |
| 0.006983251  | 0.885194077 |
| -0.122200901 | 0.011207962 |
| -0.050012659 | 0.300802792 |
| -0.211823252 | 9.42E-06    |
| -0.207157949 | 1.49E-05    |
| -0.167260429 | 0.000496096 |
| -0.063311458 | 0.19007825  |
| -0.023973183 | 0.620075955 |
| -0.237089811 | 6.59E-07    |
| -0.099283099 | 0.039602408 |
| -0.134564996 | 0.005189981 |

|              |             |
|--------------|-------------|
| -0.054983353 | 0.255245349 |
| 0.058741785  | 0.224137427 |
| -0.201562492 | 2.54E-05    |
| -0.144198012 | 0.002725361 |
| -0.23196725  | 1.16E-06    |
| -0.13647147  | 0.004582999 |
| -0.146622415 | 0.002303194 |
| 0.064142803  | 0.184313866 |
| -0.141551127 | 0.003265772 |
| 0.293416794  | 5.51E-10    |
| -0.132731665 | 0.005840985 |
| -0.103306256 | 0.032217502 |
| -0.093614681 | 0.052398353 |
| -0.091018164 | 0.05931992  |
| -0.093455189 | 0.052803191 |
| -0.057481982 | 0.234248563 |
| 0.009347439  | 0.846745474 |
| -0.270407507 | 1.22E-08    |
| -0.111885773 | 0.020305738 |
| -0.112104002 | 0.020060994 |
| -0.257666324 | 5.98E-08    |
| -0.145372267 | 0.002512796 |
| -0.07370733  | 0.12699616  |
| -0.107607451 | 0.02565577  |
| -0.272079058 | 9.81E-09    |
| -0.104717339 | 0.029922377 |
| 0.0595925    | 0.2174879   |
| -0.109836534 | 0.022733443 |
| 0.118481081  | 0.013956184 |
| -0.130669419 | 0.006660184 |
| -0.012710066 | 0.792700914 |
| -0.023824668 | 0.622245291 |
| -0.199426048 | 3.11E-05    |
| -0.138176319 | 0.004095292 |
| -0.214085343 | 7.52E-06    |
| -0.16970966  | 0.000408388 |
| 0.167083371  | 0.00050307  |
| -0.120262246 | 0.012573881 |
| 0.090226722  | 0.061574234 |
| -0.184634184 | 0.000117797 |
| -0.006473065 | 0.893529879 |
| -0.116008391 | 0.016096074 |
| 0.081508906  | 0.091393094 |
| -0.181594594 | 0.000152975 |
| -0.080293508 | 0.096344327 |
| -0.149828832 | 0.001836478 |
| -0.161960711 | 0.000748972 |
| -0.314620442 | 2.47E-11    |
| -0.152215174 | 0.001547214 |
| -0.019971099 | 0.679632085 |
| 0.136827056  | 0.00447715  |

|              |             |
|--------------|-------------|
| -0.081849497 | 0.090042795 |
| -0.103783974 | 0.031424209 |
| -0.176157978 | 0.0002416   |
| 0.025584038  | 0.59676089  |
| 0.051173196  | 0.289711413 |
| -0.122228223 | 0.01118969  |
| 0.237071563  | 6.60E-07    |
| -0.359029165 | 1.58E-14    |
| -0.010688409 | 0.825091869 |
| -0.111288435 | 0.020988973 |
| -0.022543954 | 0.641086772 |
| -0.106966606 | 0.026553658 |
| -0.30483942  | 1.07E-10    |
| -0.493058524 | 1.01E-27    |
| 0.10287348   | 0.032950866 |
| -0.223710148 | 2.80E-06    |
| -0.026132254 | 0.588917849 |
| 0.070363411  | 0.145214274 |
| -0.127751684 | 0.007995027 |
| 0.041798255  | 0.38725729  |
| -0.177470643 | 0.000216622 |
| -0.138724973 | 0.003948627 |
| 0.106135967  | 0.027757616 |
| -0.08656669  | 0.072936576 |
| -0.069018043 | 0.153082794 |
| 0.170082563  | 0.000396377 |
| -0.053070456 | 0.272176995 |
| -0.255016827 | 8.25E-08    |
| -0.264562524 | 2.55E-08    |
| -0.132348403 | 0.005986013 |
| -0.119262503 | 0.013334089 |
| 0.140110315  | 0.00359922  |
| -0.173503164 | 0.000300559 |
| -0.135129557 | 0.005003099 |
| -0.120961394 | 0.012065221 |
| 0.204290102  | 1.96E-05    |
| -0.191733718 | 6.29E-05    |
| -0.127974723 | 0.007885143 |
| -0.071602505 | 0.13824391  |
| 0.207371782  | 1.46E-05    |
| -0.06475292  | 0.180166212 |
| 8.08E-05     | 0.998667262 |
| 0.257461488  | 6.13E-08    |
| -0.119315946 | 0.013292449 |
| -0.087369553 | 0.070307842 |
| -0.030602139 | 0.526811675 |
| -0.079550217 | 0.099476206 |
| -0.140030157 | 0.003618646 |
| -0.239458054 | 5.05E-07    |
| -0.072960497 | 0.130902921 |
| -0.131754321 | 0.006217212 |

|              |             |
|--------------|-------------|
| -0.187434621 | 9.22E-05    |
| -0.146008315 | 0.002404075 |
| -0.029147692 | 0.54664966  |
| -0.188327647 | 8.53E-05    |
| -0.010649518 | 0.825718103 |
| -0.084154524 | 0.081319852 |
| -0.120718029 | 0.01224018  |
| -0.099698019 | 0.038779846 |
| -0.24053141  | 4.48E-07    |
| -0.133605547 | 0.005522042 |
| -0.081738886 | 0.090479553 |
| -0.091435525 | 0.058158883 |
| 0.089340942  | 0.064180593 |
| 0.093917608  | 0.05163655  |
| 0.074564195  | 0.122625875 |
| -0.10495272  | 0.029553491 |
| -0.095265967 | 0.048356862 |
| -0.043418246 | 0.369109459 |
| -0.16454756  | 0.000613496 |
| -0.095587535 | 0.047600982 |
| -0.107508077 | 0.025793265 |
| 0.255062407  | 8.20E-08    |
| 0.066146243  | 0.170954001 |
| -0.163046605 | 0.000689042 |
| -0.193919945 | 5.17E-05    |
| 0.341873192  | 3.11E-13    |
| -0.231507316 | 1.22E-06    |
| 0.029990952  | 0.535103177 |
| 0.077925246  | 0.106604857 |
| -0.195381809 | 4.52E-05    |
| -0.099485129 | 0.039200066 |
| -0.244006507 | 3.01E-07    |
| -0.075083037 | 0.120037083 |
| -0.043058061 | 0.373098152 |
| 0.093870626  | 0.051754093 |
| 0.022702825  | 0.638736615 |
| -0.317655924 | 1.55E-11    |
| -0.112920049 | 0.019168392 |
| -0.12249434  | 0.011013084 |
| -0.213109842 | 8.29E-06    |
| -0.025555491 | 0.597170601 |
| -0.111271792 | 0.021008291 |
| 0.017031138  | 0.724716232 |
| 0.379197367  | 3.74E-16    |
| 0.29405194   | 5.04E-10    |
| 0.100225886  | 0.037754319 |
| -0.098726224 | 0.040729544 |
| -0.048975748 | 0.310948104 |
| 0.056018328  | 0.246395121 |
| -0.082501984 | 0.087500669 |
| -0.18489595  | 0.000115153 |

|              |             |
|--------------|-------------|
| 0.075331771  | 0.118811232 |
| -0.052664357 | 0.275867887 |
| 0.037771068  | 0.434663449 |
| -0.107008628 | 0.026493962 |
| 0.388077765  | 6.62E-17    |
| -0.141482011 | 0.003281103 |
| -0.017769332 | 0.713298935 |
| -0.136819242 | 0.004479452 |
| -0.021532215 | 0.656136623 |
| -0.427270009 | 1.65E-20    |
| -0.259166492 | 4.98E-08    |
| 0.117854272  | 0.014473501 |
| -0.237513253 | 6.28E-07    |
| -0.374717885 | 8.80E-16    |
| -0.119017125 | 0.013526752 |
| -0.094737414 | 0.049621097 |
| -0.011787454 | 0.807442404 |
| -0.013550298 | 0.779339482 |
| 0.015149475  | 0.75409094  |
| -0.063485096 | 0.188863479 |
| -0.293856601 | 5.18E-10    |
| 0.144665169  | 0.002638908 |
| 0.000108753  | 0.99820589  |
| 0.143532282  | 0.002853022 |
| -0.174361373 | 0.000280171 |
| 0.036303007  | 0.452742078 |
| -0.138655292 | 0.003966987 |
| -0.269573479 | 1.35E-08    |
| 0.10463385   | 0.030054163 |
| 0.04379425   | 0.364973891 |
| -0.10857746  | 0.024346509 |
| -0.012029505 | 0.803568088 |
| -0.356341204 | 2.55E-14    |
| -0.112143468 | 0.020017009 |
| 0.024297213  | 0.615354308 |
| -0.100619494 | 0.037004672 |
| -0.009740163 | 0.840391151 |
| 0.067895569  | 0.159891544 |
| -0.146360501 | 0.002345738 |
| -0.204090744 | 2.00E-05    |
| -0.170807852 | 0.000373951 |
| 0.106374054  | 0.027407821 |
| -0.171037832 | 0.00036709  |
| -0.151422206 | 0.001638336 |
| -0.015818743 | 0.743599757 |
| -0.034211236 | 0.479217663 |
| -0.05084079  | 0.292859836 |
| -0.079690262 | 0.098880014 |
| -0.168094961 | 0.000464414 |
| -0.011977518 | 0.804399807 |
| 0.104950164  | 0.029557476 |

|              |             |
|--------------|-------------|
| -0.000785116 | 0.987048404 |
| -0.11174236  | 0.020467986 |
| -0.198732253 | 3.32E-05    |
| 0.197902873  | 3.58E-05    |
| 0.057022487  | 0.238015413 |
| -0.047444399 | 0.326337846 |
| -0.006719265 | 0.889505759 |
| -0.056725793 | 0.240470181 |
| -0.077988762 | 0.106318839 |
| -0.181085266 | 0.000159757 |
| -0.147665252 | 0.002140696 |
| -0.128088408 | 0.007829654 |
| -0.113811462 | 0.018233077 |
| 0.14598767   | 0.002407535 |
| -0.057622806 | 0.23310259  |
| -0.249514982 | 1.59E-07    |
| -0.223557226 | 2.85E-06    |
| -0.209551777 | 1.18E-05    |
| -0.299974922 | 2.17E-10    |
| 0.007560885  | 0.875771575 |
| -0.071065212 | 0.141234163 |
| -0.12004962  | 0.012732283 |
| 0.036086634  | 0.455441967 |
| -0.218289521 | 4.91E-06    |
| -0.161022114 | 0.000804623 |
| -0.178757831 | 0.000194492 |
| -0.225338923 | 2.36E-06    |
| -0.12470412  | 0.009639385 |
| 0.043223239  | 0.371265679 |
| -0.17283533  | 0.000317373 |
| 0.01870071   | 0.698984838 |
| -0.154026905 | 0.001356212 |
| 0.079521491  | 0.099598852 |
| -0.005387175 | 0.911309888 |
| -0.245027271 | 2.68E-07    |
| 0.297287785  | 3.18E-10    |
| -0.24321159  | 3.30E-07    |
| 0.095840227  | 0.047013971 |
| 0.252745543  | 1.08E-07    |
| 0.135707722  | 0.004818019 |
| -0.135602069 | 0.004851372 |
| -0.203518352 | 2.11E-05    |
| -0.178576789 | 0.000197471 |
| 0.193759669  | 5.24E-05    |
| -0.12437131  | 0.009836016 |
| -0.093088928 | 0.053742742 |
| 0.073041054  | 0.130477099 |
| -0.133748383 | 0.005471427 |
| -0.084700263 | 0.079358007 |
| 0.066415262  | 0.16921656  |
| 0.097454071  | 0.043406411 |

|              |             |
|--------------|-------------|
| -0.116820398 | 0.015363641 |
| -0.083495747 | 0.083740102 |
| -0.193599003 | 5.32E-05    |
| -0.088540803 | 0.066612346 |
| 0.114589537  | 0.017449482 |
| -0.011052806 | 0.819229824 |
| -0.165622627 | 0.000564188 |
| 0.139573287  | 0.003731198 |
| 0.21073018   | 1.05E-05    |
| 0.094906723  | 0.049213156 |
| -0.327702031 | 3.19E-12    |
| -0.126099191 | 0.008852623 |
| -0.066494973 | 0.168704293 |
| -0.016884129 | 0.726997343 |
| -0.178750565 | 0.000194611 |
| 0.096949509  | 0.044508386 |
| -0.092887835 | 0.054264482 |
| -0.034991619 | 0.469243073 |
| -0.108158949 | 0.024904139 |
| -0.166762053 | 0.000515961 |
| -0.233126782 | 1.02E-06    |
| -0.125881994 | 0.008971227 |
| 0.198502213  | 3.39E-05    |
| -0.115815741 | 0.016274269 |
| 0.053830903  | 0.265356496 |
| -0.091378777 | 0.058315633 |
| -0.239678885 | 4.93E-07    |
| 0.039358956  | 0.415585133 |
| -0.155387462 | 0.001227298 |
| 0.017237753  | 0.721514329 |
| -0.229552482 | 1.50E-06    |
| -0.254753387 | 8.51E-08    |
| -0.074577123 | 0.122560844 |
| 0.06364681   | 0.187737262 |
| -0.277482906 | 4.84E-09    |
| -0.093437679 | 0.052847795 |
| -0.0414685   | 0.391016691 |
| -0.083500371 | 0.083722914 |
| -0.257514356 | 6.09E-08    |
| -0.018130817 | 0.707731083 |
| 0.106964905  | 0.026556076 |
| -0.050527528 | 0.295847807 |
| 0.013581557  | 0.778843621 |
| -0.126988738 | 0.008381307 |
| 0.090127691  | 0.061861224 |
| 0.056323769  | 0.243824695 |
| -0.112684609 | 0.019422299 |
| -0.086110381 | 0.074465991 |
| -0.133936123 | 0.005405534 |
| 0.037450844  | 0.438571071 |
| -0.172415751 | 0.000328382 |



|              |             |
|--------------|-------------|
| -0.059373053 | 0.219189498 |
| -0.065381302 | 0.175967042 |
| -0.129560576 | 0.007141947 |
| -0.072931764 | 0.131055061 |
| 0.128340016  | 0.007708085 |
| -0.017148453 | 0.722897615 |
| 0.514239634  | 2.13E-30    |
| -0.204489817 | 1.93E-05    |
| 0.039658429  | 0.412043042 |
| -0.124690505 | 0.00964736  |
| -0.122457723 | 0.011037237 |
| -0.156638956 | 0.001118775 |
| 0.026534909  | 0.583187643 |
| -0.094294519 | 0.050701611 |
| -0.204194106 | 1.98E-05    |
| 0.119141023  | 0.013429167 |
| -0.023188916 | 0.631568477 |
| -0.035768307 | 0.459430378 |
| 0.029286804  | 0.544736409 |
| -0.203594405 | 2.10E-05    |
| -0.130127682 | 0.006891793 |
| -0.126453092 | 0.008662358 |
| -0.146719237 | 0.002287646 |
| -0.196002502 | 4.27E-05    |
| -0.042898255 | 0.374876339 |
| -0.066532701 | 0.168462238 |
| -0.373549781 | 1.10E-15    |
| -0.041341527 | 0.392470127 |
| 0.010754323  | 0.824030792 |
| -0.147484726 | 0.002168054 |
| -0.043486277 | 0.368359055 |
| 0.029083907  | 0.547528023 |
| 0.109205665  | 0.023529729 |
| -0.036843218 | 0.44604086  |
| -0.253776303 | 9.57E-08    |
| 0.068741907  | 0.154737054 |
| -0.078202411 | 0.105361196 |
| -0.03755311  | 0.43732096  |
| 0.081321298  | 0.092143783 |
| 0.045558798  | 0.345953701 |
| -0.115757135 | 0.01632882  |
| 0.297189104  | 3.23E-10    |
| 0.162415365  | 0.000723316 |
| 0.517507865  | 7.91E-31    |
| -0.024746927 | 0.608827513 |
| -0.093696157 | 0.052192542 |
| -0.21089365  | 1.03E-05    |
| -0.010824244 | 0.822905548 |
| -0.22874879  | 1.64E-06    |
| -0.296230006 | 3.70E-10    |
| -0.279826201 | 3.55E-09    |

|              |             |
|--------------|-------------|
| 0.014117844  | 0.770350672 |
| 0.064248046  | 0.183593426 |
| 0.0235149    | 0.62678057  |
| 0.06363829   | 0.187796475 |
| -0.039940263 | 0.408725945 |
| -0.107653709 | 0.025591983 |
| 0.007835189  | 0.871303114 |
| 0.160433696  | 0.000841435 |
| 0.019780677  | 0.682519933 |
| -0.116864082 | 0.015325081 |
| 0.150405872  | 0.001762317 |
| -0.025171199 | 0.602698259 |
| -0.271944617 | 9.98E-09    |
| -0.143733851 | 0.002813806 |
| -0.019211272 | 0.691182771 |
| -0.093090001 | 0.053739969 |
| 0.020887062  | 0.665807057 |
| -0.062180489 | 0.198131119 |
| -0.167503144 | 0.00048668  |
| 0.116582721  | 0.015574938 |
| -0.146019187 | 0.002402255 |
| -0.286299316 | 1.48E-09    |
| -0.359971381 | 1.33E-14    |
| -0.17073443  | 0.000376166 |
| -0.088826155 | 0.065736581 |
| -0.102297209 | 0.033949459 |
| -0.119290952 | 0.013311909 |
| -0.166686256 | 0.000519047 |
| 0.172194704  | 0.000334324 |
| -0.216164621 | 6.10E-06    |
| -0.175927537 | 0.000246254 |
| -0.219953602 | 4.14E-06    |
| -0.359511691 | 1.45E-14    |
| -0.154608455 | 0.001299658 |
| -0.187568374 | 9.12E-05    |
| -0.130292774 | 0.006820458 |
| -0.284196483 | 1.97E-09    |
| 0.1442653    | 0.002712752 |
| -0.138297883 | 0.004062377 |
| -0.188240303 | 8.59E-05    |
| 0.10946542   | 0.02319899  |
| -0.091046919 | 0.059239318 |
| 0.195564026  | 4.45E-05    |
| 0.059960616  | 0.214654807 |
| -0.122630472 | 0.010923699 |
| -0.259367423 | 4.86E-08    |
| -0.182839266 | 0.00013752  |
| -0.287764205 | 1.21E-09    |
| -0.192569965 | 5.84E-05    |
| -0.006826765 | 0.887749563 |
| -0.14414394  | 0.002735533 |

|              |             |
|--------------|-------------|
| -0.010593549 | 0.826619499 |
| -0.047580233 | 0.324953138 |
| -0.036090128 | 0.455398287 |
| -0.19570892  | 4.39E-05    |
| -0.032044467 | 0.507507221 |
| -0.120609702 | 0.012318775 |
| -0.089798104 | 0.062824306 |
| -0.09541964  | 0.047994392 |
| -0.22971568  | 1.48E-06    |
| -0.342506551 | 2.80E-13    |
| -0.074210776 | 0.124414019 |
| 0.11797212   | 0.014374972 |
| 0.006094736  | 0.899718926 |
| -0.001849056 | 0.96950329  |
| 0.07850125   | 0.104033164 |
| -0.005839577 | 0.903896506 |
| 0.06977441   | 0.148620256 |
| -0.196413583 | 4.11E-05    |
| -0.077356287 | 0.10919414  |
| -0.101796375 | 0.034838161 |
| -0.083078513 | 0.085302792 |
| -0.102840816 | 0.03300679  |
| -0.037733152 | 0.435125079 |
| 0.022080678  | 0.647960349 |
| 0.158626909  | 0.000964423 |
| -0.108298905 | 0.024716445 |
| 0.095171988  | 0.048579655 |
| -0.014841439 | 0.758934958 |
| -0.014218235 | 0.768763841 |
| 0.023754736  | 0.623267915 |
| 0.204189734  | 1.98E-05    |
| 0.086772763  | 0.072254323 |
| -0.379224913 | 3.72E-16    |
| -0.206204738 | 1.63E-05    |
| -0.019542842 | 0.686133334 |
| -0.326265104 | 4.02E-12    |
| -0.104663593 | 0.030007157 |
| -0.172147985 | 0.000335592 |
| -0.190928476 | 6.77E-05    |
| -0.096560058 | 0.045374956 |
| -0.03684662  | 0.445998835 |
| -0.176894141 | 0.000227279 |
| 0.19381942   | 5.21E-05    |
| -0.130664765 | 0.006662144 |
| 0.191593219  | 6.37E-05    |
| -0.070505505 | 0.144401583 |
| -0.019361284 | 0.688896538 |
| -0.023254214 | 0.630608166 |
| -0.306549613 | 8.29E-11    |
| 0.063601301  | 0.188053694 |
| -0.116857848 | 0.015330578 |

|              |             |
|--------------|-------------|
| 0.196144191  | 4.22E-05    |
| -0.02350389  | 0.626942015 |
| 0.005136111  | 0.915427368 |
| 0.192104546  | 6.09E-05    |
| -0.197438323 | 3.74E-05    |
| -0.079086186 | 0.101472103 |
| -0.032927234 | 0.495877307 |
| -0.128706865 | 0.007533855 |
| 0.001471101  | 0.975734793 |
| -0.068865886 | 0.15399266  |
| -0.196107768 | 4.23E-05    |
| -0.131975773 | 0.006130109 |
| -0.320535709 | 9.91E-12    |
| -0.12602384  | 0.008893611 |
| -0.010933907 | 0.821141457 |
| 0.014359695  | 0.766529477 |
| -0.057261038 | 0.236054533 |
| -0.180173572 | 0.000172605 |
| -0.199890307 | 2.98E-05    |
| -0.155828758 | 0.001187971 |
| 0.169130682  | 0.000427711 |
| -0.056232921 | 0.244587253 |
| 0.072302613  | 0.134420762 |
| -0.011885273 | 0.80587612  |
| -0.114696819 | 0.01734378  |
| -0.155142437 | 0.001249648 |
| -0.101985981 | 0.034499414 |
| -0.030187813 | 0.53242537  |
| -0.115369377 | 0.016693794 |
| -0.053606946 | 0.267352887 |
| -0.107040055 | 0.026449395 |
| -0.041356233 | 0.392301623 |
| 0.331224319  | 1.81E-12    |
| -0.102007557 | 0.034461044 |
| 0.063786853  | 0.186765968 |
| -0.075231301 | 0.119305203 |
| 0.124037983  | 0.010036514 |
| -0.133939746 | 0.005404269 |
| -0.148560531 | 0.002009623 |
| 0.109492782  | 0.023164386 |
| -0.199463561 | 3.10E-05    |
| 0.012813985  | 0.791045007 |
| -0.208890144 | 1.26E-05    |
| -0.500120313 | 1.36E-28    |
| 0.027324724  | 0.572023636 |
| -0.080125261 | 0.097046268 |
| -0.091836407 | 0.057061464 |
| 0.064059287  | 0.184887055 |
| -0.100516003 | 0.037200541 |
| 0.029782835  | 0.537941422 |
| -0.084099681 | 0.081519154 |

|              |             |
|--------------|-------------|
| -0.157067858 | 0.001083665 |
| -0.090786412 | 0.059972854 |
| -0.19712953  | 3.85E-05    |
| -0.027024341 | 0.576257592 |
| 0.044016373  | 0.362544427 |
| -0.057381175 | 0.235071333 |
| -0.168557254 | 0.000447684 |
| -0.110410122 | 0.022029814 |
| 0.051113778  | 0.290272528 |
| 0.119809574  | 0.012913225 |
| -0.09950578  | 0.039159136 |
| -0.184955097 | 0.000114563 |
| -0.076270286 | 0.114273768 |
| -0.026450327 | 0.584389181 |
| -0.169758421 | 0.000406798 |
| 0.444211265  | 3.21E-22    |
| 0.073864187  | 0.12618723  |
| -0.191034325 | 6.70E-05    |
| 0.087915596  | 0.068564638 |
| 0.001697069  | 0.972008959 |
| -0.150309592 | 0.001774497 |
| 0.430959708  | 7.11E-21    |
| -0.036150493 | 0.454644195 |
| 0.425400698  | 2.51E-20    |
| -0.090115341 | 0.061897091 |
| 0.180749025  | 0.000164387 |
| -0.128435677 | 0.007662309 |
| 0.421917771  | 5.46E-20    |
| -0.120689351 | 0.012260943 |
| -0.28367109  | 2.12E-09    |
| -0.217709956 | 5.21E-06    |
| -0.158638406 | 0.000963591 |
| -0.037131922 | 0.442482742 |
| 0.01368457   | 0.777210172 |
| -0.194439962 | 4.93E-05    |
| -0.123339411 | 0.010468514 |
| 0.299799278  | 2.22E-10    |
| -0.198886469 | 3.27E-05    |
| 0.243278232  | 3.27E-07    |
| -0.285798149 | 1.58E-09    |
| -0.034015897 | 0.481732353 |
| 0.081772371  | 0.090347154 |
| -0.052684552 | 0.275683546 |
| -0.016647947 | 0.730667193 |
| -0.276060815 | 5.84E-09    |
| -0.214295852 | 7.36E-06    |
| -0.192697342 | 5.77E-05    |
| -0.040020829 | 0.407780622 |
| -0.260939623 | 4.01E-08    |
| -0.032880975 | 0.496483207 |
| -0.17602645  | 0.000244246 |

|              |             |
|--------------|-------------|
| 0.032803128  | 0.497503715 |
| -0.380817905 | 2.74E-16    |
| -0.189670948 | 7.57E-05    |
| -0.078596955 | 0.103610665 |
| -0.307830781 | 6.85E-11    |
| 0.255918149  | 7.40E-08    |
| 0.027589968  | 0.568297257 |
| -0.14954087  | 0.001874545 |
| -0.172877807 | 0.000316278 |
| -0.095724808 | 0.047281335 |
| -0.068286383 | 0.157495494 |
| -0.045480909 | 0.34677976  |
| -0.035827569 | 0.458686394 |
| -0.203902188 | 2.04E-05    |
| -0.123892991 | 0.010124854 |
| -0.028022179 | 0.562250065 |
| -0.07358985  | 0.127604645 |
| 0.263140452  | 3.05E-08    |
| -0.123226558 | 0.010539828 |
| -0.156778409 | 0.001107246 |
| -0.185297888 | 0.000111202 |
| -0.102091923 | 0.034311364 |
| -0.470358591 | 4.69E-25    |
| -0.32244846  | 7.34E-12    |
| -0.104309809 | 0.030570378 |
| -0.065534243 | 0.174956105 |
| 0.02042042   | 0.672836511 |
| -0.014317031 | 0.767203159 |
| -0.069785795 | 0.148553849 |
| -0.133837005 | 0.005440233 |
| 0.208608613  | 1.29E-05    |
| -0.168806742 | 0.00043889  |
| -0.302883101 | 1.42E-10    |
| -0.310687252 | 4.47E-11    |
| -0.122484073 | 0.011019851 |
| -0.21881834  | 4.65E-06    |
| -0.120392036 | 0.012478048 |
| -0.195993389 | 4.27E-05    |
| -0.022124713 | 0.647305706 |
| -0.159832992 | 0.000880617 |
| -0.048633385 | 0.314346679 |
| 0.084434213  | 0.08030957  |
| -0.153238264 | 0.001436521 |
| 0.220041639  | 4.10E-06    |
| -0.12039221  | 0.012477919 |
| 0.014618496  | 0.762446748 |
| -0.017750222 | 0.713593715 |
| 0.167974562  | 0.000468866 |
| -0.068993245 | 0.153230803 |
| -0.118614408 | 0.013848269 |
| 0.039720823  | 0.411307322 |

|              |             |
|--------------|-------------|
| -0.072479407 | 0.133468326 |
| 0.136129333  | 0.004686971 |
| -0.083614732 | 0.08329872  |
| -0.038829126 | 0.421895532 |
| -0.08101485  | 0.093380599 |
| 0.172782282  | 0.000318746 |
| -0.035564845 | 0.461989793 |
| -0.325264455 | 4.71E-12    |
| -0.020505539 | 0.671552139 |
| -0.244134113 | 2.97E-07    |
| -0.130672606 | 0.006658842 |
| 0.016777056  | 0.728660312 |
| -0.222698116 | 3.11E-06    |
| -0.180792367 | 0.000163783 |
| 0.0105052    | 0.828042863 |
| -0.409655287 | 7.86E-19    |
| -0.121669701 | 0.011568517 |
| -0.055473588 | 0.251026199 |
| -0.18223287  | 0.000144857 |
| -0.104103802 | 0.03090249  |
| -0.088270686 | 0.067450151 |
| -0.152190256 | 0.001550006 |
| -0.18360214  | 0.000128786 |
| 0.089007607  | 0.065184628 |
| -0.049961527 | 0.301297862 |
| 0.040933682  | 0.397160675 |
| -0.132822091 | 0.005807231 |
| 0.155071219  | 0.001256214 |
| -0.052691598 | 0.275619247 |
| -0.108948759 | 0.023860845 |
| -0.055130382 | 0.25397484  |
| -0.219947197 | 4.14E-06    |
| 0.137345465  | 0.004326785 |
| 0.19423494   | 5.02E-05    |
| 0.069603335  | 0.149620827 |
| -0.078678335 | 0.103252474 |
| -0.014381188 | 0.766190178 |
| -0.127688083 | 0.00802661  |
| -0.142230528 | 0.003118486 |
| -0.032374722 | 0.503139675 |
| -0.045883615 | 0.342522309 |
| 0.498885458  | 1.93E-28    |
| -0.071666008 | 0.137893724 |
| -0.188502834 | 8.40E-05    |
| 0.034323345  | 0.477777675 |
| 0.060019688  | 0.214202656 |
| -0.094470936 | 0.050268881 |
| -0.309419302 | 5.41E-11    |
| -0.24085184  | 4.32E-07    |
| -0.235465287 | 7.89E-07    |
| -0.001430242 | 0.976408538 |

|              |             |
|--------------|-------------|
| -0.290015251 | 8.87E-10    |
| -0.143704504 | 0.002819485 |
| 0.099837381  | 0.038506831 |
| 0.05418667   | 0.262206223 |
| -0.081533903 | 0.091293443 |
| -0.110060911 | 0.022455912 |
| -0.196237844 | 4.18E-05    |
| -0.089284336 | 0.064350192 |
| 0.246711277  | 2.20E-07    |
| -0.174492881 | 0.000277163 |
| -0.067126961 | 0.164683782 |
| -0.214471716 | 7.23E-06    |
| 0.034432861  | 0.476373255 |
| -0.073831964 | 0.126353081 |
| 0.011980779  | 0.804347616 |
| -0.052688804 | 0.275644742 |
| -0.230529538 | 1.35E-06    |
| -0.125053982 | 0.009436452 |
| 0.057414332  | 0.234800484 |
| -0.084044715 | 0.081719298 |
| -0.310256069 | 4.77E-11    |
| -0.181517298 | 0.000153986 |
| 0.029338238  | 0.544029864 |
| -0.037947769 | 0.4325158   |
| 0.193160695  | 5.53E-05    |
| -0.125118857 | 0.009399242 |
| 0.056194816  | 0.244907594 |
| 0.3913281    | 3.47E-17    |
| 0.341281892  | 3.44E-13    |
| -0.151388916 | 0.001642266 |
| 0.366265185  | 4.25E-15    |
| -0.129696739 | 0.007081155 |
| -0.086368915 | 0.073596286 |
| -0.258446604 | 5.44E-08    |
| 0.34579692   | 1.60E-13    |
| -0.041201456 | 0.394077268 |
| 0.085339812  | 0.077107925 |
| -0.08997791  | 0.062297375 |
| 0.052466404  | 0.277679289 |
| 0.125961207  | 0.008927809 |
| 0.043786545  | 0.365058352 |
| -0.133629514 | 0.00551352  |
| -0.015062213 | 0.755462197 |
| -0.081678652 | 0.090718108 |
| 0.044131981  | 0.36128397  |
| -0.139097178 | 0.003851854 |
| -0.056601155 | 0.24150668  |
| -0.132274806 | 0.00601423  |
| 0.033681732  | 0.486050743 |
| -0.074135855 | 0.124795679 |
| -0.037420981 | 0.438936505 |



|              |             |
|--------------|-------------|
| 0.098211612  | 0.04179511  |
| 0.481148056  | 2.68E-26    |
| 0.244390644  | 2.88E-07    |
| 0.04860516   | 0.314627944 |
| 0.316867561  | 1.75E-11    |
| -0.009609748 | 0.842500156 |
| -0.151764729 | 0.001598388 |
| 0.216602517  | 5.83E-06    |
| -0.250850473 | 1.36E-07    |
| -0.143580435 | 0.002843609 |
| 0.11950559   | 0.013145612 |
| -0.254494136 | 8.78E-08    |
| -0.067658073 | 0.161360968 |
| -0.112399048 | 0.019734183 |
| -0.004671483 | 0.923053205 |
| -0.183158516 | 0.0001338   |
| 0.03406118   | 0.481148773 |
| 0.175357756  | 0.000258122 |
| 0.095377768  | 0.048092931 |
| 0.058593442  | 0.22531161  |
| -0.273763864 | 7.88E-09    |
| -0.141613531 | 0.003251984 |
| 0.44250482   | 4.82E-22    |
| -0.077510609 | 0.108486984 |
| -0.122412768 | 0.011066954 |
| -0.020145079 | 0.67699768  |
| -0.103737367 | 0.031500863 |
| -0.063807485 | 0.18662318  |
| -0.124476037 | 0.009773761 |
| -0.094417108 | 0.050400588 |
| -0.306715626 | 8.09E-11    |
| 0.060981389  | 0.206937677 |
| -0.230891811 | 1.30E-06    |
| -0.070915174 | 0.142077972 |
| -0.12791003  | 0.007916875 |
| -0.113197342 | 0.018873063 |
| -0.011232355 | 0.816345091 |
| -0.090011331 | 0.062199837 |
| -0.153930446 | 0.001365808 |
| -0.042992887 | 0.373822717 |
| -0.126371889 | 0.00870569  |
| -0.274514018 | 7.15E-09    |
| 0.039858591  | 0.409685566 |
| -0.017972771 | 0.710163526 |
| -0.066076318 | 0.171407778 |
| -0.132613697 | 0.005885285 |
| -0.379115076 | 3.80E-16    |
| -0.216060767 | 6.16E-06    |
| -0.094705148 | 0.049699159 |
| -0.124522703 | 0.009746133 |
| 0.163950485  | 0.000642578 |

|              |             |
|--------------|-------------|
| -0.029836942 | 0.537202801 |
| 0.213622019  | 7.88E-06    |
| -0.034960122 | 0.46964343  |
| -0.131737842 | 0.006223738 |
| -0.063995756 | 0.185323959 |
| 0.166227629  | 0.000538084 |
| -0.206813187 | 1.54E-05    |
| -0.036139101 | 0.454786456 |
| -0.103907342 | 0.03122208  |
| -0.112382774 | 0.019752088 |
| -0.07988865  | 0.098040315 |
| 0.02351024   | 0.626848899 |
| -0.09790146  | 0.042448604 |
| -0.226060816 | 2.19E-06    |
| -0.18299258  | 0.000135722 |
| -0.028195846 | 0.559829003 |
| -0.304803448 | 1.07E-10    |
| -0.112525882 | 0.019595123 |
| -0.035710341 | 0.46015875  |
| -0.185167561 | 0.000112468 |
| 0.065674782  | 0.174030957 |
| -0.257594938 | 6.04E-08    |
| -0.043127848 | 0.372323255 |
| 0.514531874  | 1.95E-30    |
| -0.098179725 | 0.041861903 |
| 0.24414655   | 2.96E-07    |
| -0.196313313 | 4.15E-05    |
| -0.213428239 | 8.03E-06    |
| -0.207933145 | 1.38E-05    |
| 0.451034245  | 6.16E-23    |
| -0.211084474 | 1.01E-05    |
| -0.008925341 | 0.853586125 |
| -0.12250926  | 0.011003256 |
| 0.019642681  | 0.684615604 |
| 0.215962125  | 6.22E-06    |
| -0.311006418 | 4.26E-11    |
| 0.046906885  | 0.331854753 |
| -0.048077996 | 0.319911496 |
| -0.35895342  | 1.60E-14    |
| -0.206422668 | 1.60E-05    |
| 0.256714041  | 6.72E-08    |
| 0.068935396  | 0.153576499 |
| -0.030305744 | 0.530824456 |
| -0.190872063 | 6.80E-05    |
| 0.166844766  | 0.000512614 |
| -0.317165249 | 1.67E-11    |
| -0.127608234 | 0.008066419 |
| -0.255412552 | 7.86E-08    |
| -0.1302299   | 0.006847547 |
| -0.238629101 | 5.55E-07    |
| -0.057815906 | 0.231537663 |

|              |             |
|--------------|-------------|
| -0.022172317 | 0.646598305 |
| 0.152008494  | 0.001570505 |
| -0.141316255 | 0.00331814  |
| 0.207595874  | 1.43E-05    |
| -0.107758439 | 0.025448071 |
| -0.154804499 | 0.001281087 |
| -0.226459874 | 2.09E-06    |
| 0.013430456  | 0.781241342 |
| -0.360533622 | 1.21E-14    |
| 0.005833131  | 0.904002085 |
| 0.06244786   | 0.196205265 |
| -0.072725063 | 0.13215357  |
| -0.278987865 | 3.97E-09    |
| -0.077136855 | 0.110205896 |
| -0.028528262 | 0.555208938 |
| -0.151672854 | 0.001609015 |
| 0.215429275  | 6.57E-06    |
| -0.214828238 | 6.98E-06    |
| 0.087791661  | 0.068957156 |
| 0.324842729  | 5.03E-12    |
| -0.027516436 | 0.569329129 |
| -0.070741354 | 0.143060348 |
| -0.105511602 | 0.028693203 |
| -0.33661796  | 7.49E-13    |
| -0.093549621 | 0.05256318  |
| -0.223930005 | 2.74E-06    |
| 0.185281209  | 0.000111363 |
| -0.18150929  | 0.000154091 |
| 0.034519749  | 0.475260628 |
| -0.121007582 | 0.012032267 |
| 0.170339638  | 0.000388288 |
| -0.065372883 | 0.176022814 |
| 0.004270942  | 0.929632874 |
| -0.101374784 | 0.035601521 |
| 0.406094864  | 1.67E-18    |
| -0.116154138 | 0.0159624   |
| -0.125430694 | 0.009222199 |
| -0.091254602 | 0.058659851 |
| -0.068431477 | 0.156612872 |
| 0.032344127  | 0.503543452 |
| -0.084426647 | 0.080336766 |
| -0.007574375 | 0.875551725 |
| -0.007625    | 0.874726766 |
| -0.142147471 | 0.003136162 |
| 0.156258343  | 0.001150806 |
| 0.451349382  | 5.70E-23    |
| -0.038984406 | 0.420040332 |
| -0.047215665 | 0.328678218 |
| -0.0299088   | 0.536222639 |
| -0.087777648 | 0.069001653 |
| -0.215235165 | 6.70E-06    |

|              |             |
|--------------|-------------|
| -0.009169641 | 0.849625554 |
| -0.145930007 | 0.002417225 |
| -0.15198752  | 0.001572887 |
| -0.356291193 | 2.57E-14    |
| -0.125319677 | 0.009284885 |
| -0.18302032  | 0.000135399 |
| -0.020005241 | 0.679114791 |
| -0.058809714 | 0.223601208 |
| 0.063398398  | 0.189469301 |
| -0.145941233 | 0.002415336 |
| -0.317202694 | 1.66E-11    |
| 0.023813252  | 0.622412188 |
| -0.128065368 | 0.007840872 |
| -0.091769492 | 0.057243441 |
| -0.142087564 | 0.003148968 |
| 0.16858516   | 0.000446692 |
| -0.111186464 | 0.021107581 |
| -0.213393618 | 8.06E-06    |
| -0.359896177 | 1.35E-14    |
| -0.063657778 | 0.187661055 |
| -0.151497197 | 0.001629512 |
| -0.11067747  | 0.021708358 |
| -0.067408207 | 0.162917868 |
| -0.036125505 | 0.454956267 |
| -0.023928941 | 0.620721847 |
| 0.082846928  | 0.086180249 |
| 0.092495999  | 0.055293211 |
| -0.110085075 | 0.022426199 |
| -0.087972698 | 0.068384407 |
| -0.139275285 | 0.00380631  |
| -0.146622357 | 0.002303204 |
| -0.015135225 | 0.75431481  |
| -0.032012159 | 0.507935546 |
| -0.112964521 | 0.019120758 |
| 0.076997636  | 0.110851625 |
| -0.045559036 | 0.345951174 |
| -0.314741062 | 2.42E-11    |
| -0.073867053 | 0.126172485 |
| -0.050238418 | 0.298623396 |
| -0.099440332 | 0.039288979 |
| -0.100719479 | 0.036816269 |
| 0.039309731  | 0.416169067 |
| 0.116408817  | 0.015731152 |
| -0.105876611 | 0.02814302  |
| 0.309786011  | 5.12E-11    |
| 0.033880138  | 0.483484234 |
| 0.060725215  | 0.208855242 |
| -0.0234712   | 0.627421512 |
| 0.003730895  | 0.938511726 |
| -0.009647002 | 0.84189759  |
| -0.08823896  | 0.067549118 |

|              |             |
|--------------|-------------|
| -0.166019356 | 0.000546941 |
| -0.055948654 | 0.246984096 |
| 0.21712521   | 5.53E-06    |
| -0.14106379  | 0.003375279 |
| -0.030303596 | 0.530853586 |
| 0.185370597  | 0.000110501 |
| -0.097522856 | 0.043257977 |
| -0.13059476  | 0.006691683 |
| -0.137296804 | 0.004340703 |
| 0.07633028   | 0.113988399 |
| -0.124275424 | 0.009893325 |
| -0.134197032 | 0.005315146 |
| 0.022591527  | 0.640382661 |
| 0.026660846  | 0.581400762 |
| 0.130881831  | 0.006571292 |
| -0.152746876 | 0.001488746 |
| 0.289880414  | 9.03E-10    |
| -0.124870998 | 0.009542111 |
| -0.179571511 | 0.000181615 |
| -0.193766986 | 5.24E-05    |
| -0.272811963 | 8.92E-09    |
| 0.030380469  | 0.529811331 |
| -0.094788632 | 0.049497392 |
| -0.0584876   | 0.226152049 |
| 0.240861662  | 4.31E-07    |
| -0.035009439 | 0.469016644 |
| -0.107103598 | 0.026359477 |
| -0.085649116 | 0.076038456 |
| -0.143730276 | 0.002814497 |
| -0.021976831 | 0.649505257 |
| 0.099049781  | 0.0400714   |
| -0.225252177 | 2.38E-06    |
| 0.058525104  | 0.225853998 |
| -0.093119035 | 0.05366499  |
| -0.121864363 | 0.011435216 |
| -0.117413197 | 0.014847557 |
| -0.136395565 | 0.004605884 |
| -0.060574051 | 0.209992774 |
| 0.074253238  | 0.124198114 |
| -0.145774316 | 0.002443564 |
| -0.084010095 | 0.081845563 |
| 0.077277723  | 0.109555538 |
| -0.063708147 | 0.187311389 |
| -0.077587093 | 0.108137852 |
| 0.035770321  | 0.459405082 |
| -0.041069398 | 0.395596104 |
| -0.106464574 | 0.027275827 |
| -0.032307031 | 0.504033255 |
| 0.052228955  | 0.279862738 |
| -0.107697852 | 0.025531239 |
| -0.069544405 | 0.149966677 |

|              |             |
|--------------|-------------|
| 0.204242206  | 1.97E-05    |
| -0.107803077 | 0.025386946 |
| -0.069349737 | 0.151113464 |
| -0.198061726 | 3.53E-05    |
| -0.06357213  | 0.188256737 |
| -0.051006411 | 0.291288288 |
| -0.132895649 | 0.005779903 |
| 0.103025348  | 0.032691911 |
| -0.169451164 | 0.000416913 |
| -0.211408828 | 9.82E-06    |
| 0.171993641  | 0.000339815 |
| 0.052322007  | 0.279005698 |
| -0.155792152 | 0.001191189 |
| -0.13432867  | 0.00527006  |
| -0.127863187 | 0.007939923 |
| -0.125163549 | 0.009373684 |
| -0.447451444 | 1.47E-22    |
| -0.029062952 | 0.547816744 |
| -0.025373039 | 0.59979212  |
| -0.069921686 | 0.147762968 |
| 0.083675191  | 0.083075163 |
| 0.223533483  | 2.85E-06    |
| -0.190443027 | 7.07E-05    |
| -0.121767841 | 0.011501141 |
| -0.061119829 | 0.205906709 |
| -0.109466994 | 0.023196999 |
| -0.110600251 | 0.021800784 |
| -0.140795057 | 0.003437081 |
| -0.006721373 | 0.889471317 |
| -0.225024089 | 2.44E-06    |
| 0.098134952  | 0.041955838 |
| -0.202417351 | 2.35E-05    |
| 0.013312218  | 0.783119043 |
| 0.548964527  | 3.27E-35    |
| 0.059560686  | 0.217733999 |
| 0.019732531  | 0.683250832 |
| -0.210770171 | 1.05E-05    |
| -0.026265219 | 0.587022753 |
| -0.17981635  | 0.000177899 |
| -0.177025392 | 0.00022481  |
